# Supplementary material for: The vaginal metabolomics profile with features of polycystic ovary syndrome: a pilot investigation in China
Source: PeerJ. 2024 Oct 8;12:e18194. doi: 10.7717/peerj.18194 (PMC11468964; doi:10.7717/peerj.18194)
Supplement: Supplemental Information 3 — Raw data of all differential metabolites in Excel. Each row represents a metabolite and each column represents a metabolomic characteristics. [file peerj-12-18194-s003.xlsx]

## Sheet: Sheet1
POS/NEG	MS2 name	MS2 score	rt	mz	SuperClass	MEAN case	MEAN control	VIP	P-VALUE	Q-VALUE	FOLD CHANGE	LOG_FOLDCHANGE
NEG	Dopamine	0.728855	359.101	299.077	Benzenoids	4.08778	0.00168453	1.47156	8.60983e-05	0.000109964	2426.66	11.2448
POS	N-Cyclopropyl-trans-2-cis-6-nonadienamide	0.911517	183.451	194.153	Lipids and lipid-like molecules	4.26484e-05	0.0695765	1.58205	4.21663e-06	1.96908e-05	0.000612972	-10.6719
NEG	Isocitric acid	0.92578	279.503	191.019	Organic acids and derivatives	40.5873	0.0255728	1.41863	0.00060438	0.000387195	1587.12	10.6322
POS	5,6-Dimethoxysterigmatocystin	0.99023	284.337	385.087	Phenylpropanoids and polyketides	0.0466799	3.8749e-05	1.53675	0.0120891	0.00448121	1204.67	10.2344
POS	4,8 Dimethylnonanoyl carnitine	0.603152	250.904	330.262	Lipids and lipid-like molecules	4.26484e-05	0.0434478	1.55416	0.00145155	0.000820598	0.0009816	-9.99258
POS	11-Dehydro-thromboxane B2	0.506799	101.394	369.225	Lipids and lipid-like molecules	0.000430563	0.326985	1.52885	1.10816e-05	3.5372e-05	0.00131677	-9.56878
NEG	3,3-Dimethylglutaric acid	0.882668	375.752	159.065	Lipids and lipid-like molecules	0.00119527	0.896727	1.45262	0.00136286	0.000693341	0.00133292	-9.55119
NEG	m-Coumaric acid	0.998483	187.756	163.039	Phenylpropanoids and polyketides	84.958	0.117637	1.4798	1.47978e-07	3.83468e-06	722.205	9.49626
NEG	Oxoadipic acid	0.944241	176.312	159.029	Organic acids and derivatives	2.06107	0.00294254	1.44303	0.00014372	0.000148347	700.439	9.45211
POS	24-Epibrassinolide	0.71007	58.7298	481.35	Lipids and lipid-like molecules	4.26484e-05	0.0287552	1.57254	0.000257823	0.000242576	0.00148315	-9.39712
NEG	L-Cysteine	0.752965	87.1915	178.017	Organic acids and derivatives	0.783953	0.00117298	1.44148	0.00054684	0.00035975	668.344	9.38445
NEG	20-Hydroxyeicosatetraenoic acid	0.781959	32.0127	319.23	Lipids and lipid-like molecules	137.838	0.256143	1.44841	8.51242e-05	0.000109195	538.127	9.0718
POS	Dioscoretine	0.962675	265.674	242.174	Lipids and lipid-like molecules	4.26484e-05	0.0148625	1.56989	0.000131237	0.000159228	0.00286953	-8.44497
NEG	2-(3,4-dihydroxyphenyl)-3,4-dihydro-2H-1-benzopyran-3,5,7-triol	0.931092	87.3648	289.071	Phenylpropanoids and polyketides	0.051027	15.5569	1.40028	0.00645003	0.00221499	0.00328003	-8.25208
POS	3,4-Dihydroxymandelaldehyde	0.576284	179.007	169.049	Benzenoids	0.0655778	0.000320349	1.5276	2.30307e-05	5.48072e-05	204.707	7.67742
POS	3-O-Feruloylquinic acid	0.887962	284.469	369.113	Organooxygen compounds	0.255641	0.00130864	1.46085	0.00520574	0.00222276	195.348	7.6099
NEG	Caprylic acid	0.535581	142.695	143.106	Lipids and lipid-like molecules	0.0255396	4.85819	1.3441	9.53292e-07	8.72136e-06	0.00525702	-7.57154
NEG	8-Hydroxyoctanoate	0.831115	140.054	159.102	Organic compounds	0.158688	28.9789	1.30148	2.34591e-06	1.43334e-05	0.00547601	-7.51266
POS	5,7-dihydroxy-2-phenyl-6,8-bis[3,4,5-trihydroxy-6-(hydroxymethyl)oxan-2-yl]-4H-chromen-4-one	0.88533	319.339	579.168		0.0329162	0.000188305	1.5036	0.00386099	0.00173491	174.802	7.44958
NEG	Sedoheptulose	0.858947	397.031	209.066	Organic oxygen compounds	0.104788	0.000606364	1.40138	0.0126339	0.00378905	172.814	7.43308
NEG	5,7-dihydroxy-3-{[3,4,5-trihydroxy-6-(hydroxymethyl)oxan-2-yl]oxy}-2-(3,4,5-trihydroxyphenyl)-4H-chromen-4-one	0.765995	65.5385	481.098		0.00247577	0.401034	1.4123	0.00138023	0.000699705	0.00617347	-7.3397
POS	(3beta,5alpha,6beta,9alpha,22E,24R)-23-Methylergosta-7,22-diene-3,5,6,9-tetrol	0.729787	110.116	461.36	Lipids and lipid-like molecules	0.068812	0.000524715	1.48085	0.0001032	0.000137836	131.142	7.03498
POS	Prostaglandin G2	0.600968	33.4188	351.214	Lipids and lipid-like molecules	0.00195418	0.252895	1.471	1.2732e-05	3.83972e-05	0.00772724	-7.01583
POS	10-Hydroxy-2,8-decadiene-4,6-diynoic acid	0.534519	196.656	177.054	Lipids and lipid-like molecules	0.717036	0.00579486	1.37264	0.000536016	0.000402522	123.736	6.95113
NEG	4-Methylbenzoic acid	0.646268	79.7817	135.044	Benzenoids	32.4416	0.286257	1.45802	0.00331335	0.00133406	113.33	6.82439
POS	Alpha-dihydroartemisinin	0.602875	110.443	285.168	Lipids and lipid-like molecules	0.000415094	0.0455803	1.48213	2.22062e-05	5.36096e-05	0.00910687	-6.77883
POS	5,7-dihydroxy-2-(4-hydroxyphenyl)-8-[3,4,5-trihydroxy-6-(hydroxymethyl)oxan-2-yl]-4H-chromen-4-one	0.804622	224.024	433.111	Phenylpropanoids and polyketides	0.0129692	0.000120715	1.4966	0.00607151	0.00252033	107.436	6.74734
NEG	Deoxyguanosine	0.574997	338.928	266.089	Nucleosides, nucleotides, and analogues	0.0387909	0.000394429	1.44587	0.00185338	0.000857274	98.3469	6.61981
NEG	Quinic acid	0.997181	355.545	191.055	Organic oxygen compounds	23.0772	0.249534	1.43062	0.000593581	0.000382154	92.4814	6.53109
POS	N-Methylsalsolinol	0.84267	347.512	194.116	Organoheterocyclic compounds	0.000633497	0.0566156	1.4346	0.00015035	0.000172867	0.0111894	-6.48172
NEG	Riboflavin	0.536287	272.506	375.129	Organoheterocyclic compounds	0.615423	0.00696519	1.36487	6.00622e-05	8.74179e-05	88.3569	6.46527
POS	Petunidin 3-glucoside	0.799755	350.51	479.113	Phenylpropanoids and polyketides	0.0033819	3.8749e-05	1.46802	0.00930018	0.00359793	87.2771	6.44753
POS	Campesterol	0.684498	29.0173	383.366	Lipids and lipid-like molecules	0.0262077	0.000301859	1.49253	0.0032524	0.00150954	86.821	6.43997
POS	2'-Hydroxyacetophenone	0.980415	272.172	137.059	Benzenoids	0.236964	0.00287043	1.39205	0.000123571	0.000153726	82.5535	6.36726
POS	2,3-Octanedione	0.735441	35.9819	143.106	Organooxygen compounds	0.00644816	0.495686	1.56696	4.57783e-09	4.41736e-07	0.0130086	-6.26439
POS	Polyethylene, oxidized	0.835018	146.264	245.137	Lipids and lipid-like molecules	0.00888967	0.604288	1.53177	9.40704e-05	0.000130367	0.014711	-6.08696
POS	Monoisobutyl phthalic acid	0.815338	78.9056	223.095	Benzenoids	0.00208028	0.137083	1.39389	0.000101888	0.000136796	0.0151753	-6.04213
POS	4-(Methylnitrosamino)-1-(3-pyridyl)-1-butanol glucuronide	0.937726	203.681	386.157	Lipids and lipid-like molecules	0.0342618	0.00053899	1.46708	0.000251551	0.000238906	63.5668	5.9902
NEG	trans-Ferulic acid	0.981175	195.11	193.05	Phenylpropanoids and polyketides	3.70397	0.0615732	1.34272	5.96171e-05	8.70673e-05	60.1555	5.91062
POS	16(17)-EpDPE	0.682321	31.3696	345.241	Lipids and lipid-like molecules	0.000430073	0.0243321	1.45559	1.89235e-05	4.84767e-05	0.0176752	-5.82213
POS	2-Methylfuran	0.992651	35.2227	83.0492	Organoheterocyclic compounds	0.00120755	0.0666969	1.44019	5.30813e-06	2.26498e-05	0.018105	-5.78747
POS	Nicotinamide N-oxide	0.90057	137.777	139.042	Organoheterocyclic compounds	0.192538	0.00353457	1.35983	0.000552507	0.000411162	54.4727	5.76746
POS	Cyanidin 3-galactoside	0.857249	355.314	449.104	Phenylpropanoids and polyketides	0.00305204	5.60681e-05	1.54189	0.000610652	0.000440424	54.4345	5.76645
POS	Glycerol tributanoate	0.691159	119.853	303.178	Lipids and lipid-like molecules	0.0451142	2.45404	1.24392	7.47183e-05	0.000112807	0.0183837	-5.76543
POS	(-)-Epigallocatechin 3-(4-methyl-gallate)	0.804557	349.622	473.103	Phenylpropanoids and polyketides	0.0224576	0.000444916	1.44902	5.39784e-05	9.1952e-05	50.4761	5.65753
POS	(R)-3-Hydroxy-Octadecanoic acid	0.678086	33.4255	301.272	Lipids and lipid-like molecules	0.0736751	0.00152865	1.4389	8.31388e-06	2.97432e-05	48.196	5.59084
POS	Digitoxigenin 3-[glucosyl-(1->6)-glucosyl-(1->4)-2,6-dideoxyribohexoside]	0.869305	232.497	829.414	Lipids and lipid-like molecules	0.000141093	0.00677939	1.50313	8.64199e-05	0.000123677	0.020812	-5.58644
POS	1-Methyladenine	0.910762	116.67	150.075	Organoheterocyclic compounds	2.2291	0.049669	1.42988	0.00336253	0.00154941	44.879	5.48797
NEG	Sebacic acid	0.92306	130.677	201.112	Lipids and lipid-like molecules	0.0750406	2.98675	1.25097	4.75401e-05	7.65429e-05	0.0251245	-5.31476
POS	Homovanillic acid	0.737525	142.448	183.064	Benzenoids	2.35786	0.0594711	1.53797	3.8947e-08	1.70988e-06	39.6472	5.30915
NEG	Suberic acid	0.74067	377.1	173.081	Lipids and lipid-like molecules	0.137546	5.42049	1.18916	0.000494881	0.000335989	0.0253751	-5.30044
POS	5a,6a-Epoxy-7E-megastigmene-3b,9e-diol 9-glucoside	0.771719	151.286	389.214	Lipids and lipid-like molecules	0.303178	0.00773415	1.34845	0.00254492	0.0012507	39.1999	5.29278
NEG	Phenylpyruvic acid	0.953661	204.442	163.039	Benzenoids	6.55108	0.168594	1.4061	3.23255e-05	5.9837e-05	38.8572	5.28011
NEG	Azelaic acid	0.907696	85.867	187.097	Lipids and lipid-like molecules	0.12575	4.42659	1.19233	4.4857e-06	1.89821e-05	0.0284079	-5.13757
NEG	Caproic acid	0.861798	72.5973	115.075	Lipids and lipid-like molecules	2.35554	79.4596	1.11691	0.00259362	0.0011108	0.0296445	-5.07609
POS	Undecanedioic acid	0.813919	102.311	217.142	Lipids and lipid-like molecules	0.00455518	0.146736	1.33329	2.28535e-05	5.45527e-05	0.0310433	-5.00958
POS	Homovanillin	0.951544	271.399	167.069	Benzenoids	0.237587	0.00759587	1.27061	0.000188583	0.000198897	31.2785	4.9671
POS	(3beta,4alpha,5alpha,23E)-4-Methylergosta-7,23-dien-3-ol	0.713901	102.124	413.376	Lipids and lipid-like molecules	0.0379419	0.00131459	1.40599	1.0214e-05	3.36405e-05	28.862	4.8511
NEG	Allantoin	0.925152	202.181	157.036	Organoheterocyclic compounds	15.5366	0.556973	1.32669	0.014104	0.00414561	27.8947	4.80192
POS	Betaine	0.999953	291.558	118.086	Organic acids and derivatives	68.224	2.538	1.52242	2.51408e-05	5.77221e-05	26.881	4.74852
NEG	3-Methoxy-4-hydroxyphenylethyleneglycol sulfate	0.717436	52.9531	263.022	Organic acids and derivatives	4.386	0.163694	1.19605	0.00338487	0.0013555	26.7939	4.74383
NEG	Hydroxyoctanoic acid	0.996815	165.278	159.102	Lipids and lipid-like molecules	1.06344	26.7634	1.34883	5.81215e-07	6.81349e-06	0.039735	-4.65345
POS	3-(2-Hydroxyphenyl)propanoic acid	0.82308	195.069	167.069	Phenylpropanoids and polyketides	9.04019	0.388185	1.4803	5.71276e-05	9.50317e-05	23.2883	4.54153
POS	2(N)-Methyl-norsalsolinol	0.91195	62.5042	180.101	Organoheterocyclic compounds	0.00780837	0.179021	1.28482	1.50832e-06	1.08735e-05	0.043617	-4.51897
POS	Alpha-Lactose	0.672671	382.889	343.122	Organic oxygen compounds	0.00701591	0.000345754	1.11882	0.00588643	0.00245627	20.2916	4.34281
NEG	2,3-Dinor-TXB2	0.730456	96.5689	341.197	Lipids and lipid-like molecules	0.0270191	0.52505	1.23823	4.81276e-06	1.94887e-05	0.05146	-4.2804
POS	Deoxyadenosine	0.993707	149.425	252.107	Nucleosides, nucleotides, and analogues	1.49308	0.0780193	1.18951	0.029382	0.00936305	19.1373	4.25832
POS	Brassicasterol	0.954843	102.51	381.349	Lipids and lipid-like molecules	0.125679	0.00663145	1.28657	2.15791e-07	3.97358e-06	18.9519	4.24427
POS	PE(22:4(7Z,10Z,13Z,16Z)/22:2(13Z,16Z))	0.712811	36.8912	848.626	Lipids and lipid-like molecules	0.0803712	0.00424689	1.30746	3.1617e-06	1.66549e-05	18.9247	4.2422
POS	Nicotine glucuronide	0.903504	432.404	339.153	Organic oxygen compounds	0.0150093	0.000834888	1.28318	0.00384308	0.00172838	17.9776	4.16813
NEG	trans-trans-Muconic acid	0.607215	110.698	141.018	Lipids and lipid-like molecules	5.27313	0.299353	1.37278	0.00014441	0.000148795	17.6151	4.13874
POS	Nandrolone	0.667181	35.1377	275.199	Lipids and lipid-like molecules	0.00882437	0.153995	1.29887	4.37548e-07	5.87545e-06	0.0573031	-4.12524
POS	Methyl 2-octynoate	0.567231	38.6857	155.106	Lipids and lipid-like molecules	0.0132429	0.227244	1.5231	0.00010442	0.000138793	0.0582763	-4.10095
NEG	2-Oxovaleric acid	0.637646	218.528	115.039	Organic acids and derivatives	1.19892	19.6071	1.4612	3.22767e-08	2.06507e-06	0.0611474	-4.03157
POS	Toluene	0.5	32.8439	93.0698	Benzenoids	0.00904199	0.147732	1.43682	8.24046e-05	0.000120077	0.0612052	-4.0302
POS	25-Hydroxycholesterol	0.895626	52.8949	425.339	Lipids and lipid-like molecules	0.0010698	0.0174664	1.3696	5.19881e-06	2.23529e-05	0.061249	-4.02917
POS	(3beta,22E,24R)-5,8-Epidioxy-23-methylergosta-6,22-dien-3-ol	0.765038	109.774	443.35	Lipids and lipid-like molecules	0.0535553	0.00335753	1.28219	4.92941e-05	8.74464e-05	15.9508	3.99555
NEG	Cyclohexanecarboxylic acid	0.773216	80.5314	127.075	Organic acids and derivatives	0.0670393	1.03396	1.21877	9.78629e-05	0.000118757	0.0648375	-3.94703
NEG	3-Methyl-2-oxovaleric acid	0.717561	172.847	129.054	Organic acids and derivatives	0.421085	6.43129	1.38745	7.46344e-10	1.19378e-07	0.0654744	-3.93292
POS	Ethyl 2-furanpropionate	0.801501	195.137	169.085	Lipids and lipid-like molecules	0.0233697	0.35209	1.19916	1.63977e-05	4.46296e-05	0.0663742	-3.91323
POS	1-Pentadecanecarboxylic acid	0.521981	198.728	311.11	Organooxygen compounds	0.00692227	0.10386	1.45904	3.76192e-07	5.39346e-06	0.0666501	-3.90725
NEG	Gentisic acid	0.954509	70.8106	153.018	Benzenoids	39.6437	2.7048	1.30271	0.00526465	0.00189635	14.6568	3.8735
NEG	Syringic acid	0.917111	381.783	197.045	Benzenoids	0.1853	0.0137961	1.43375	0.000146571	0.000150189	13.4314	3.74754
NEG	3-Hydroxycapric acid	0.704811	68.9226	187.133	Organic acids and derivatives	0.26693	3.43159	1.33736	0.000354394	0.000271284	0.0777861	-3.68434
POS	Clionasterol	0.89822	62.5759	397.38	Lipids and lipid-like molecules	0.156859	0.0127026	1.20945	2.44078e-05	5.6733e-05	12.3486	3.62627
NEG	Maleic acid	0.999934	50.6332	115.002	Organic acids and derivatives	6.01804	73.7723	1.40013	6.46512e-06	2.2978e-05	0.0815759	-3.61571
POS	N-Acetyl-b-glucosaminylamine	0.589575	472.224	221.112	Organic oxygen compounds	0.03635	0.00309638	1.52207	3.20342e-07	4.89427e-06	11.7395	3.5533
POS	alpha-Chaconine	0.502659	235.365	852.51	Lipids and lipid-like molecules	0.0183555	0.205491	1.07961	0.000151168	0.000173424	0.0893249	-3.48479
POS	PC(22:6(4Z,7Z,10Z,13Z,16Z,19Z)/20:0)	0.659243	48.3527	862.64	Lipids and lipid-like molecules	0.0974164	0.00890586	1.22259	1.58866e-06	1.1185e-05	10.9385	3.45134
POS	PC(P-16:0/18:1(11Z))	0.576561	37.1086	744.579		0.341023	0.0322151	1.519	2.09651e-06	1.28922e-05	10.5858	3.40406
NEG	6-Hydroxynicotinic acid	0.788208	195.644	138.027	Organoheterocyclic compounds	1.38397	0.134072	1.29293	0.0265703	0.00698158	10.3226	3.36773
NEG	2-Hydroxyethanesulfonate	0.978064	163.137	124.99	Organic acids and derivatives	91.3977	9.11163	1.30362	0.0172567	0.00488096	10.0309	3.32638
NEG	Sinapic acid	0.866743	168.8	223.061	Phenylpropanoids and polyketides	1.45502	0.14832	1.11062	0.0158596	0.0045532	9.80998	3.29425
POS	3-beta-Hydroxy-4-beta-methyl-5-alpha-cholest-7-ene-4-alpha-carbaldehyde	0.646478	76.4778	429.371	Lipids and lipid-like molecules	0.108595	0.0112835	1.12922	0.00226234	0.00114366	9.62418	3.26666
POS	N1-Methyl-2-pyridone-5-carboxamide	0.882943	175.188	153.065	Organoheterocyclic compounds	0.545974	0.057956	1.44714	0.00017958	0.000192442	9.42049	3.2358
POS	5-Methyltetrahydropteroyltri-L-glutamate	0.964024	345.663	641.255	Organoheterocyclic compounds	0.000660752	0.00620965	1.17074	0.00589586	0.00245943	0.106407	-3.23233
POS	Quinone	0.647303	234.169	109.028	Organic oxygen compounds	0.0263299	0.0028318	1.19164	0.000184095	0.000195705	9.29796	3.21691
NEG	Citramalic acid	0.889177	279.679	147.029	Lipids and lipid-like molecules	3.04053	0.328999	1.28256	0.00143764	0.000720417	9.24177	3.20817
NEG	cis-Aconitic acid	0.98262	460.585	173.008	Organic acids and derivatives	3.69951	0.40083	1.28201	0.00140126	0.000707346	9.22963	3.20627
POS	o-Xylene	0.843965	32.7186	107.085	Benzenoids	0.0273205	0.241811	1.50872	0.000131137	0.000159158	0.112983	-3.14583
NEG	Hydroxyphenyllactic acid	0.94472	233.39	181.049	Phenylpropanoids and polyketides	1.39177	0.157728	1.2741	0.00571714	0.00202036	8.82388	3.14141
POS	PC(22:1(13Z)/14:0)	0.535773	38.0149	788.606	Lipids and lipid-like molecules	0.284413	0.0326245	1.44317	6.02171e-05	9.81842e-05	8.71776	3.12396
POS	Citronellyl hexanoate	0.98552	33.4203	255.23	Lipids and lipid-like molecules	0.0505364	0.424538	1.47318	3.46863e-05	7.08943e-05	0.119039	-3.0705
POS	p-Mentha-1,3,5,8-tetraene	0.9877	99.496	133.101	Benzenoids	0.109151	0.915938	1.30913	0.00887808	0.00345973	0.119169	-3.06892
POS	(3beta,5alpha,6beta,22E,24R)-23-Methylergosta-7,22-diene-3,5,6-triol	0.731991	217.59	445.365	Lipids and lipid-like molecules	0.0259803	0.00318184	1.36464	0.000623603	0.000446697	8.16519	3.02949
POS	LysoPC(20:1(11Z))	0.514019	217.233	550.385	Lipids and lipid-like molecules	0.0815726	0.0102241	1.09221	0.0131509	0.00480233	7.97845	2.99611
POS	beta-D-Glucosamine	0.95039	150.372	180.087	Organooxygen compounds	2.30383	0.295076	1.16769	0.0123656	0.00456557	7.80758	2.96488
NEG	Bovinic acid	0.99041	96.3922	279.232	Lipids and lipid-like molecules	1.45537	0.193393	1.2776	0.0135959	0.00402399	7.52546	2.91178
POS	p-Cresol	0.659565	39.7766	109.065	Benzenoids	0.0320694	0.239512	1.38727	7.51832e-05	0.000113262	0.133895	-2.90083
POS	Methyl dihydrojasmonate	0.944762	38.8798	227.163	Lipids and lipid-like molecules	0.0635025	0.455174	1.00693	6.34349e-05	0.000101337	0.139512	-2.84153
POS	Falcarindiol	0.578154	31.0887	261.183	Lipids and lipid-like molecules	0.00952567	0.0663358	1.48584	9.56998e-05	0.000131741	0.143598	-2.79989
POS	Eicosadienoic acid	0.923929	134.289	309.277	Lipids and lipid-like molecules	0.0181617	0.125751	1.03348	0.00034298	0.000295603	0.144426	-2.7916
NEG	2-Hydroxybenzaldehyde	0.999644	37.7149	121.028	Benzenoids	25.2052	3.67239	1.38231	0.000392629	0.00029025	6.86343	2.77893
NEG	3,4-Dihydroxyhydrocinnamic acid	0.912877	149.926	181.049	Phenylpropanoids and polyketides	1.88375	0.277049	1.31252	0.00227538	0.0010049	6.79933	2.76539
POS	2-Furanmethanol	0.994364	34.3859	99.0439	Organoheterocyclic compounds	0.0210317	0.142267	1.27118	0.000128562	0.000157339	0.147833	-2.75796
NEG	4-Hydroxybenzoic acid	0.953241	195.583	137.023	Benzenoids	19.5103	2.90575	1.24397	0.0281226	0.0073244	6.71437	2.74725
POS	(3beta,5alpha,22E,24S)-Stigmasta-7,22,25-trien-3-ol	0.89474	51.135	411.36	Lipids and lipid-like molecules	0.0666076	0.445007	1.47876	1.0651e-06	8.85251e-06	0.149678	-2.74007
POS	PC(20:1(11Z)/14:0)	0.729151	48.5731	760.573	Lipids and lipid-like molecules	0.397152	0.0598364	1.371	1.55626e-06	1.10612e-05	6.6373	2.7306
POS	Vanilpyruvic acid	0.744776	154.247	211.059	Benzenoids	0.143598	0.0222451	1.45655	0.000213999	0.000216064	6.45527	2.69048
NEG	Hypogeic acid	0.999812	37.276	253.217	Lipids and lipid-like molecules	13.834	2.15048	1.21239	0.00533448	0.00191579	6.43299	2.68549
NEG	Arachidonic acid	0.997102	37.3387	303.233	Lipids and lipid-like molecules	7.65573	1.2026	1.09317	0.0149027	0.00433341	6.36599	2.67039
NEG	Threonic acid	0.972053	326.307	135.029	Organic oxygen compounds	2.31231	0.388054	1.20419	0.00126211	0.000655596	5.95874	2.57501
NEG	D-Glucuronic acid	0.810756	406.237	193.035	Organic oxygen compounds	0.156198	0.0263015	1.12908	0.00207331	0.000934529	5.93873	2.57015
POS	alpha-Methylstyrene	0.769633	31.663	119.085	Benzenoids	0.0437533	0.253072	1.50072	1.502e-05	4.24339e-05	0.172889	-2.53208
POS	Osmaronin	0.829073	452.006	260.111	Lipids and lipid-like molecules	0.0560923	0.00979902	1.06576	0.0430029	0.0128141	5.72427	2.51709
POS	Sinapic acid	0.88709	128.933	225.075	Phenylpropanoids and polyketides	0.313592	0.0548424	1.44185	8.5039e-05	0.000122454	5.71806	2.51552
POS	Hexanoylglycine	0.940283	267.426	174.111	Organic acids and derivatives	0.144672	0.0254866	1.37827	0.000221247	0.000220695	5.67638	2.50497
POS	2-Phenylethanol	0.98659	31.743	105.07	Benzenoids	0.0506541	0.279947	1.50914	5.52915e-05	9.32363e-05	0.180942	-2.4664
NEG	2,3-Dinor-6-keto-prostaglandin F1 a	0.568352	60.7311	325.202	Lipids and lipid-like molecules	0.156792	0.863821	1.37341	2.90244e-06	1.58302e-05	0.18151	-2.46188
NEG	Phenylacetic acid	0.879066	37.3675	135.044	Benzenoids	4.53214	0.83224	1.2954	0.0122105	0.00368364	5.44571	2.44512
POS	Ethyl oleate	0.921759	143.525	311.293	Lipids and lipid-like molecules	0.0206765	0.112143	1.15649	0.000738683	0.000502759	0.184376	-2.43928
NEG	Dodecanoic acid	0.984293	50.7961	199.17	Lipids and lipid-like molecules	0.805729	4.33888	1.27277	1.15929e-05	3.06664e-05	0.1857	-2.42895
POS	(9Z,11E,13E,15Z)-4-Oxo-9,11,13,15-octadecatetraenoic acid	0.577424	53.7559	291.194	Lipids and lipid-like molecules	0.0335528	0.179153	1.39978	0.000130276	0.000158554	0.187286	-2.41668
POS	2-Methylpyridine	0.999431	266.596	94.0651	Organoheterocyclic compounds	0.792509	0.14877	1.33103	4.49989e-05	8.30516e-05	5.32709	2.41335
POS	PE(22:6(4Z,7Z,10Z,13Z,16Z,19Z)/18:4(6Z,9Z,12Z,15Z))	0.702332	153.187	784.485	Lipids and lipid-like molecules	0.742548	0.141534	1.43065	8.44765e-05	0.000121951	5.24644	2.39134
NEG	Capric acid	0.715947	51.5715	171.138	Lipids and lipid-like molecules	0.766942	3.92371	1.30711	6.55609e-07	7.20903e-06	0.195464	-2.35503
NEG	Tetradecanedioic acid	0.983138	256.034	257.175	Lipids and lipid-like molecules	0.00745878	0.037852	1.10705	0.00186351	0.000860348	0.197051	-2.34336
NEG	2-Pyrocatechuic acid	0.886927	29.1663	153.022	Benzenoids	2.07791	0.418568	1.30872	0.000469886	0.000325225	4.96432	2.3116
POS	LysoPC(16:0)	0.585153	222.091	496.337	Lipids and lipid-like molecules	1.89013	0.38298	1.29964	0.00225419	0.00114063	4.93531	2.30314
NEG	D-Xylitol	0.646706	97.2887	151.06	Organic oxygen compounds	4.38129	0.895452	1.02573	0.0386526	0.0095989	4.89283	2.29067
POS	2-Pyrrolidineacetic acid	0.878442	112.678	130.086	Organoheterocyclic compounds	0.057662	0.0118743	1.32824	0.000546363	0.000407962	4.85602	2.27978
POS	N-Acetyl-beta-alanine	0.667878	116.216	132.065	Organic acids and derivatives	0.129826	0.0268616	1.18871	0.0060308	0.00250618	4.83314	2.27296
POS	S-(2-Methylpropionyl)-dihydrolipoamide-E	0.827817	451.546	278.122	Lipids and lipid-like molecules	0.0901318	0.0188873	1.17056	0.0453645	0.0133855	4.77208	2.25462
POS	Isovalerylglucuronide	0.53684	326.586	279.109	Organic oxygen compounds	0.0278843	0.00585583	1.11365	0.00459231	0.00200408	4.76181	2.25151
POS	Indanone	0.899072	147.511	133.064	Benzenoids	0.0960077	0.45615	1.13668	0.0194474	0.00669869	0.210474	-2.24829
POS	SM(d18:0/14:0)	0.572641	205.604	677.554	Lipids and lipid-like molecules	0.0803276	0.0170303	1.14409	0.0136758	0.0049621	4.71674	2.23779
NEG	2-Keto-3-deoxy-D-gluconic acid	0.735714	283.576	177.04	Organic acids and derivatives	7.45202	1.60207	1.11924	0.00621524	0.00215331	4.65148	2.21769
POS	3-Aminobutanoic acid	0.793182	117.737	104.07	Organic acids and derivatives	0.118125	0.0254439	1.17895	0.00585491	0.00244569	4.64256	2.21492
POS	Trigonelline	0.99589	305.002	138.054	Alkaloids and derivatives	3.29582	0.737616	1.24544	0.000185018	0.000196366	4.46821	2.1597
POS	PC(P-16:0/20:1(11Z))	0.535031	47.1457	772.61		0.120692	0.0271624	1.45527	4.34233e-07	5.85098e-06	4.44335	2.15165
NEG	10E,12Z-Octadecadienoic acid	0.999821	37.3362	279.232	Lipids and lipid-like molecules	31.9054	7.34218	1.17893	0.00448327	0.00167922	4.34549	2.11952
POS	N-Ethylglycine	0.943977	164.813	104.07	Organic acids and derivatives	0.0703312	0.0164155	1.2011	0.0177275	0.00619927	4.28445	2.09911
NEG	Behenic acid	0.948698	50.545	339.326	Lipids and lipid-like molecules	1.16163	4.95395	1.34923	7.71234e-07	7.73498e-06	0.234486	-2.09243
POS	5-(3',4'-Dihydroxyphenyl)-gamma-valerolactone	0.517484	57.8754	209.079	Benzenoids	0.459562	0.110309	1.38044	1.14103e-06	9.23578e-06	4.16613	2.05871
POS	Panaquinquecol 1	0.713389	101.197	293.209	Lipids and lipid-like molecules	0.0277376	0.115153	1.20187	1.32403e-07	3.14118e-06	0.240877	-2.05363
POS	3-Dehydrosphinganine	0.682316	158.647	300.288	Organic oxygen compounds	0.153492	0.0388916	1.05099	0.0190443	0.006583	3.94667	1.98064
POS	Formononetin 7-O-glucuronide	0.998593	295.764	445.108	Phenylpropanoids and polyketides	0.101172	0.0256424	1.24638	0.0049461	0.00213117	3.9455	1.98021
NEG	D-Mannose	0.801855	346.84	179.055	Organic oxygen compounds	2.63283	0.670979	1.21034	0.00235313	0.00103138	3.92386	1.97227
NEG	4-Acetylbutyrate	0.569563	234.085	129.054	Lipids and lipid-like molecules	0.228392	0.886734	1.20746	2.54647e-06	1.49126e-05	0.257565	-1.95699
POS	2-Propenyl 2,4-hexadienoate	0.742204	191.082	153.09	Lipids and lipid-like molecules	0.141751	0.0376468	1.30581	0.00021886	0.000219182	3.7653	1.91276
POS	SM(d18:1/20:0)	0.659527	205.001	759.633	Lipids and lipid-like molecules	0.434282	0.115502	1.22209	0.00190764	0.0010083	3.75995	1.91071
NEG	Gluconolactone	0.661417	105.071	177.04	Organic oxygen compounds	4.51804	1.20547	1.08875	0.00577307	0.00203553	3.74793	1.9061
NEG	Oleic acid	0.999843	37.1851	281.248	Lipids and lipid-like molecules	58.7267	15.6917	1.21542	0.00136355	0.000693598	3.74255	1.90402
POS	Niacinamide	0.999505	60.7408	123.055	Organoheterocyclic compounds	1.56239	0.418708	1.05247	0.0129645	0.00474598	3.73146	1.89974
POS	SM(d16:1/24:1(15Z))	0.59382	203.184	785.649	Organic nitrogen compounds	0.124261	0.0346286	1.16896	0.00118663	0.000709996	3.58839	1.84334
POS	SM(d18:0/18:1(9Z))	0.562498	206.814	731.601	Lipids and lipid-like molecules	0.82916	0.2353	1.16256	0.00363644	0.0016522	3.52384	1.81715
POS	p-Hydroxyphenylacetic acid	0.93553	199.358	153.054	Benzenoids	0.0774681	0.269442	1.44762	1.43397e-06	1.05715e-05	0.287513	-1.7983
NEG	3-Hydroxybenzyl alcohol	0.598414	134.821	123.044	Benzenoids	4.72587	1.36752	1.20722	0.000249001	0.000213384	3.45579	1.78902
POS	LysoPC(18:1(9Z))	0.581519	214.717	522.354	Lipids and lipid-like molecules	2.08563	0.607993	1.03945	0.00431204	0.00190116	3.43036	1.77836
NEG	Linoleic acid	0.99575	66.3662	279.232	Lipids and lipid-like molecules	1.44535	0.424678	1.07587	0.00721469	0.0024142	3.40341	1.76698
POS	2-Pyrrolidinone	0.999153	390.161	86.0601	Organoheterocyclic compounds	0.575686	0.172308	1.15512	0.00480175	0.00207964	3.34102	1.74029
POS	Lycoperoside D	0.753729	143.884	740.46	Lipids and lipid-like molecules	1.32248	0.398527	1.34983	0.000260833	0.000244372	3.31842	1.7305
POS	Guanidoacetic acid	0.880683	371.9	118.061	Organic acids and derivatives	0.170694	0.05159	1.22588	0.000279189	0.00025501	3.30867	1.72625
NEG	Beta-D-Galactose	0.965015	315.307	179.055	Organic oxygen compounds	27.5918	8.87645	1.05705	0.00454659	0.00169689	3.10842	1.63618
POS	SM(d18:1/14:0)	0.625162	209.679	675.542	Lipids and lipid-like molecules	0.598999	0.195784	1.02417	0.0107294	0.00405885	3.05949	1.61329
POS	Oleic acid	0.911733	33.3359	283.262	Lipids and lipid-like molecules	0.447911	1.36378	1.39644	0.000413069	0.000335707	0.328434	-1.60632
NEG	p-Hydroxyphenylacetic acid	0.530052	152.468	151.039	Benzenoids	1.81247	0.609698	1.19116	0.00382376	0.0014874	2.97273	1.57179
NEG	(10E,12Z)-(9S)-9-Hydroperoxyoctadeca-10,12-dienoic acid	0.975986	96.7829	311.223	Lipids and lipid-like molecules	2.60007	0.881072	1.01089	0.0175834	0.00495644	2.95103	1.56122
POS	SM(d18:1/22:0)	0.606661	203.262	787.662	Lipids and lipid-like molecules	0.420817	0.145168	1.216	0.000426586	0.000342942	2.89883	1.53547
POS	Formiminoglutamic acid	0.797931	230.76	175.071	Organic acids and derivatives	0.0597783	0.0207721	1.04109	0.022	0.00741293	2.87782	1.52498
POS	Tetrahydroaldosterone-3-glucuronide	0.815546	95.2662	541.259	Lipids and lipid-like molecules	0.0815047	0.028415	1.10961	0.00490058	0.00211496	2.86837	1.52023
POS	DG(16:0/16:0/0:0)	0.845982	30.0063	591.496	Lipids and lipid-like molecules	0.0150585	0.00538042	1.24804	0.000700574	0.000484533	2.79875	1.48479
NEG	Isopalmitic acid	0.999787	37.3387	255.232	Lipids and lipid-like molecules	118.048	42.7762	1.24979	0.000563655	0.000367922	2.75966	1.46449
POS	L-Carnitine	0.999416	371.008	162.112	Organic nitrogen compounds	15.9868	5.82569	1.15548	0.00316848	0.00147938	2.7442	1.45638
NEG	Heneicosanoic acid	0.831963	37.3374	325.31	Lipids and lipid-like molecules	0.946732	2.51762	1.22673	0.000132227	0.000141038	0.376042	-1.41103
POS	SM(d18:0/22:0)	0.585098	202.599	789.672	Lipids and lipid-like molecules	0.078835	0.0298423	1.13287	0.00226397	0.00114427	2.64172	1.40148
POS	4-Aminobutyraldehyde	0.999935	206.413	88.0758	Organic oxygen compounds	0.0214005	0.0550912	1.18909	0.000713066	0.000490456	0.388456	-1.36418
NEG	3-Hydroxyanthranilic acid	0.892723	55.0838	152.034	Benzenoids	0.543395	1.39614	1.05295	0.000753321	0.000452422	0.389213	-1.36137
POS	4,4-Dimethylcholesta-8,14,24-trienol	0.749898	99.926	411.36	Lipids and lipid-like molecules	0.0188915	0.0479549	1.28099	0.000758616	0.000512531	0.393944	-1.34394
NEG	Dihydrolipoate	0.636487	72.5973	207.05	Lipids and lipid-like molecules	7.42669	2.934	1.00105	0.00689813	0.00233025	2.53125	1.33985
POS	SM(d18:1/16:0)	0.78682	208.303	703.572	Lipids and lipid-like molecules	12.1826	4.85883	1.06308	0.00328822	0.00152231	2.50732	1.32615
POS	Perulactone B	0.692902	131.478	489.287	Lipids and lipid-like molecules	0.164326	0.400401	1.04062	0.0101306	0.00386825	0.410403	-1.28489
POS	Perillyl aldehyde	0.862988	33.6947	151.111	Lipids and lipid-like molecules	0.0872764	0.210351	1.4698	3.048e-09	3.49334e-07	0.414909	-1.26913
POS	Pyridoxal	0.752964	319.397	168.064	Organoheterocyclic compounds	0.234704	0.56207	1.03483	0.00287991	0.00137389	0.417571	-1.25991
NEG	Ethyl oleate	0.800398	37.4237	309.279	Lipids and lipid-like molecules	2.61099	1.10937	1.10599	0.00119457	0.000630254	2.35357	1.23485
NEG	Heptadecanoic acid	0.99891	37.5245	269.249	Lipids and lipid-like molecules	6.91987	3.28387	1.00187	0.00160187	0.000777122	2.10723	1.07534
NEG	(2E)-3-(4-hydroxy-3-methoxyphenyl)prop-2-enal	0.840246	35.7836	177.055	Benzenoids	1.16128	2.39536	1.00833	0.000193094	0.000179132	0.484803	-1.04453
POS	PC(16:1(9Z)/P-18:0)	0.589721	169.265	744.587	Lipids and lipid-like molecules	2.53535	1.25603	1.02634	0.00337197	0.00155294	2.01855	1.01332
NEG	Urocanic acid	0.859467	134.466	137.034	Organoheterocyclic compounds	0.846586	1.64999	1.05567	0.000322915	0.000254628	0.513086	-0.962726
