# Supplementary material for: The vaginal metabolomics profile with features of polycystic ovary syndrome: a pilot investigation in China
Source: PeerJ. 2024 Oct 8;12:e18194. doi: 10.7717/peerj.18194 (PMC11468964; doi:10.7717/peerj.18194)
Supplement: Supplemental Information 4 — Raw data of detectable metabolites in positive ion mode. Each row represents a detectable metabolite and each column represents a participant. [file peerj-12-18194-s004.xlsx]

## Sheet: Sheet 1
ID	rtmed	mzmed	ca01	ca02	ca03	ca04	ca05	ca06	ca07	ca08	ca09	ca10	co01	co02	co03	co04	co05	co06	co07	co08	co09	co10	QC01	QC02	QC03
1	307.49	116.081	1.1229e+07	1.05617e+06	1.66273e+06	3.00758e+06	2.85614e+06	1.51976e+06	5.44082e+06	9.33434e+06	3.60154e+06	2.49689e+07	1.4517e+06	2.45121e+06	1.63371e+06	2.05038e+06	1.00935e+06	6.67107e+06	1.56206e+06	4.3949e+06	2.32676e+06	1.017e+06	4.02378e+06	9.26929e+06	3.62433e+06
2	291.558	118.086	3.76021e+09	3.58217e+09	3.21089e+09	3.23159e+09	2.1403e+09	1.81083e+09	3.23221e+09	2.18317e+09	4.50747e+09	4.5948e+09	1.08661e+08	1.13151e+08	8.06841e+07	9.31254e+07	5.83456e+07	3.4868e+08	9.30412e+07	1.76144e+08	1.35605e+08	6.72383e+07	2.62731e+09	2.64158e+09	2.50425e+09
3	52.1318	96.0443	5.32731e+06	4.32848e+06	1.20641e+07	8.93918e+06	7.03925e+06	3.47231e+06	8.74629e+06	7.70166e+06	1.13369e+07	1.59428e+07	6.62214e+06	2.34411e+07	1.61845e+07	8.27644e+06	2.56366e+07	1.78535e+07	1.39284e+07	1.27361e+07	3.26213e+07	3.51257e+07	1.24854e+07	1.32619e+07	1.34856e+07
4	206.413	88.0758	1.09881e+06	868697	1.25167e+06	589442	725181	792574	1.81739e+06	993258	1.7123e+06	458639	3.72797e+06	2.2164e+06	2.00409e+06	6.5023e+06	2.87236e+06	1.54781e+06	4.45824e+06	3.45304e+06	2.06955e+06	1.51472e+06	1.54338e+06	1.492e+06	1.52683e+06
5	351.187	483.161	493252	185782	705088	235282	312838	413647	313530	514870	206174	511677	1.25412e+07	1.65147e+07	1.1758e+07	5.37345e+06	1.49491e+07	1.42651e+07	1.43735e+07	1.45569e+07	2.66427e+07	1.39639e+07	7.2537e+06	6.98753e+06	7.95858e+06
6	70.772	349.181	1.33639e+07	1.01956e+07	6.36419e+06	6.72621e+06	1.12191e+07	1.47685e+07	1.12322e+07	2.57402e+07	7.92213e+06	4.8047e+06	6.37046e+06	1.75996e+07	1.13968e+07	2.01221e+07	8.24649e+06	4.80434e+06	8.76367e+06	4.87358e+06	1.84217e+07	1.08076e+07	1.17382e+07	1.32455e+07	1.14664e+07
7	154.092	104.107	2.5508e+07	1.89766e+07	2.3159e+07	1.93593e+07	2.14264e+07	1.80541e+08	1.38604e+07	1.82109e+07	1.39206e+07	1.38263e+07	1.38868e+06	797617	927339	2.96441e+06	777814	1.19984e+06	2.15776e+06	1.40275e+06	459185	1.02585e+06	1.97492e+07	1.99943e+07	1.80006e+07
8	468.764	97.0283	1.06983e+06	1.80595e+06	2.4517e+07	7.2856e+06	7.67118e+06	1.57e+06	0	6.22581e+06	6.78114e+06	5.67221e+06	1.93481e+06	1.35874e+07	3.13553e+06	216260	0	1.34774e+07	0	235955	6.23703e+06	6.70507e+06	8.54004e+06	9.22351e+06	8.33545e+06
9	284.526	132.101	1.20641e+09	1.97061e+08	3.88546e+08	4.03075e+08	1.86587e+09	1.52663e+08	5.82884e+08	4.92944e+08	2.73815e+09	3.68292e+09	1.94141e+08	1.52544e+09	2.56382e+08	7.19465e+07	1.0228e+08	1.69793e+09	4.0354e+08	1.13789e+09	4.88408e+08	1.51665e+08	1.1315e+09	1.07937e+09	1.15742e+09
10	306.948	137.062	1.34032e+07	1.92691e+07	5.50786e+07	8.98923e+06	6.75755e+06	2.51246e+07	9.99973e+06	2.8913e+07	2.58436e+07	5.80568e+06	1.98678e+07	3.4148e+07	1.36906e+08	4.56742e+07	420734	2.79073e+06	497089	425697	472975	1.42172e+08	1.52739e+07	1.38109e+07	1.34609e+07
11	279.418	335.109	6.48828e+06	3.03587e+06	6.7457e+06	2.90749e+06	2.38005e+06	7.3068e+06	2.82045e+06	1.25915e+07	7.95148e+06	1.44037e+06	3.86353e+06	1.37621e+06	3.36751e+06	1.5602e+06	2.49773e+06	0	2.58831e+06	3.53257e+06	466890	0	3.0825e+06	3.28237e+06	3.91299e+06
12	231.311	467.151	398845	1.15335e+06	1.24976e+06	1.53741e+06	994277	1.50619e+06	1.98524e+06	578081	937911	353489	18871.6	0	0	0	0	30946.2	0	0	0	0	827475	775450	839160
13	407.499	365.104	2.76771e+07	5.20221e+07	3.05702e+07	6.22897e+07	2.57372e+07	5.40635e+07	8.27071e+07	8.45542e+07	1.4192e+07	3.70299e+07	6.75547e+07	5.15566e+07	6.19909e+07	4.57589e+07	7.56607e+07	6.82393e+07	4.79234e+07	4.90193e+07	8.29355e+07	9.33425e+07	4.52799e+07	3.85824e+07	2.37929e+07
14	282.533	407.187	6.37212e+06	4.05137e+06	2.9373e+06	2.97307e+06	1.94449e+06	4.25263e+06	0	2.7317e+06	2.19228e+06	1.65729e+06	1.85594e+06	3.96739e+06	1.86445e+06	1.7006e+06	1.2132e+06	0	2.75981e+06	2.25764e+06	711084	1.64975e+06	447505	962345	620402
15	60.7408	123.055	6.58896e+07	2.30025e+07	6.33483e+07	6.5641e+07	1.56614e+08	4.98571e+07	4.40673e+07	3.10706e+07	7.96393e+07	1.08242e+08	7.60574e+06	2.79758e+07	9.6431e+06	8.13368e+06	1.13504e+07	3.72389e+07	7.57782e+06	4.2194e+07	2.2219e+07	3.60728e+07	4.51112e+07	4.34241e+07	4.39877e+07
16	397.823	337.108	2.24711e+07	5.26838e+06	1.56813e+07	7.80301e+06	4.91047e+06	8.71514e+06	1.27248e+07	4.52101e+06	7.15556e+06	8.5468e+06	30901.7	164225	149389	73919.5	164120	344024	120692	75198.5	242707	111058	9.99769e+06	6.91311e+06	1.04934e+07
17	183.268	137.045	2.23133e+09	1.1943e+09	2.29047e+09	2.88937e+09	2.65583e+09	1.15465e+09	2.10395e+09	3.53251e+09	1.92537e+09	3.56384e+09	4.69338e+08	1.55031e+09	6.15424e+08	3.46305e+08	9.19969e+08	2.02603e+09	1.34577e+09	2.30287e+09	1.36222e+09	9.26378e+08	2.18176e+09	2.12065e+09	2.11866e+09
18	266.596	94.0651	4.34091e+07	1.90269e+07	4.80139e+07	1.5597e+07	2.38203e+07	4.94666e+07	5.20279e+07	5.66753e+07	4.51795e+07	3.12483e+07	3.1323e+06	1.28062e+06	1.51546e+07	5.37946e+06	8.34496e+06	6.65216e+06	5.75286e+06	5.75096e+06	1.12382e+07	1.59404e+07	3.27947e+07	2.83271e+07	3.46408e+07
19	371.008	162.112	8.71863e+08	4.81553e+08	5.22399e+08	4.97101e+08	6.94517e+08	1.7283e+09	7.55887e+08	7.66967e+08	9.11342e+08	4.15597e+08	1.88838e+08	2.72185e+08	2.86684e+08	1.43143e+08	1.79346e+08	5.40194e+08	3.22095e+08	6.57369e+08	2.17463e+08	1.34021e+08	6.58294e+08	6.41944e+08	5.92221e+08
20	173.812	136.061	2.30487e+09	7.70457e+07	1.14308e+09	2.62637e+08	5.58205e+08	2.60761e+08	2.40067e+09	4.05204e+08	2.76734e+09	8.47037e+08	3.49396e+08	3.5996e+08	1.75208e+08	1.12653e+08	3.56876e+07	5.55039e+08	2.44605e+08	2.27283e+08	1.92744e+08	9.98162e+07	9.80431e+08	9.64076e+08	9.49835e+08
21	281.302	379.134	6.88351e+06	3.72438e+06	2.63397e+06	1.60352e+06	1.36721e+06	2.57106e+06	150184	3.71209e+06	929829	1.26034e+06	2.5872e+06	1.69543e+06	2.09233e+06	949079	1.81532e+06	0	1.98739e+06	2.71662e+06	421509	703005	576415	375818	841875
22	296.981	76.0759	0	25158.8	96904.8	4.15477e+06	0	45634.6	442164	75132.9	0	65517.7	0	117863	100191	14220.9	0	32756.6	0	0	0	97469.8	296672	230185	295760
23	87.1345	481.259	7.65584e+06	6.26062e+06	4.13965e+06	4.3157e+06	5.04369e+06	6.31953e+06	6.60878e+06	1.5282e+07	3.75747e+06	1.20119e+06	1.3716e+06	8.49499e+06	2.65424e+06	5.80862e+06	1.42733e+06	1.02001e+06	2.02444e+06	667100	5.6089e+06	2.91063e+06	3.22329e+06	5.7594e+06	4.24042e+06
24	243.186	124.039	1.1005e+07	5.14908e+06	1.19668e+07	1.47345e+07	1.30752e+07	3.3975e+06	1.54814e+07	3.22951e+06	705114	4.8268e+06	2.26028e+06	304059	688813	899823	791303	7.33671e+06	812365	2.13549e+06	6.24778e+06	2.91331e+06	5.85832e+06	5.69993e+06	5.7191e+06
25	260.624	109.076	1.39757e+06	1.42733e+06	1.708e+06	1.82789e+06	404532	3.95233e+06	3.98131e+06	1.50771e+06	4.10836e+06	6.83945e+06	554788	466078	311193	328082	551922	526744	750986	441102	443645	558444	1.29826e+06	1.14436e+06	1.39534e+06
26	257.134	150.077	2.16609e+08	1.40484e+07	6.32446e+07	4.27706e+07	4.93793e+07	5.44736e+07	9.67162e+07	3.23849e+07	3.19256e+07	3.66229e+07	3.29029e+07	5.05491e+07	4.24797e+07	1.59451e+07	5.79944e+06	3.52887e+07	1.15692e+07	1.93755e+07	2.1999e+07	2.74862e+07	3.58132e+07	3.86145e+07	3.33704e+07
27	390.161	86.0601	1.90921e+07	1.52809e+07	4.02131e+07	1.39122e+07	9.19195e+06	6.73655e+07	4.03841e+07	5.52845e+07	2.03303e+07	1.39071e+07	4.47212e+06	1.85358e+06	6.01097e+06	2.98561e+06	3.80028e+07	7.08136e+06	8.23697e+06	4.77866e+06	1.3307e+07	1.10058e+07	2.35119e+07	2.29135e+07	2.29834e+07
28	235.187	269.087	4.82533e+06	1.21146e+07	1.77532e+06	992857	2.47973e+07	2.64597e+06	2.25759e+06	4.57515e+06	1.38217e+07	3.79128e+06	312268	815256	4.69327e+06	752003	3.05648e+06	2.05247e+06	6.07827e+06	3.57361e+07	2.30583e+07	2.02354e+07	9.90595e+06	9.1416e+06	9.02119e+06
29	298.732	399.124	3.19017e+06	3.91575e+06	3.31456e+06	5.0917e+06	6.98345e+06	5.28527e+06	5.89445e+06	3.96665e+06	3.34746e+06	2.12104e+06	23728.5	431425	155935	520429	336050	278465	361087	1.45837e+06	755831	77897.8	4.44819e+06	4.69889e+06	3.25969e+06
30	366.798	307.098	6.38917e+06	4.59233e+06	9.68331e+06	5.60573e+06	3.39792e+06	2.16931e+07	6.07191e+06	1.20952e+07	2.60239e+06	5.1367e+06	0	0	0	0	0	548092	154562	1.19766e+06	0	0	4.39053e+06	5.1072e+06	4.86954e+06
31	75.7079	393.208	1.24078e+07	8.16654e+06	6.01125e+06	5.66712e+06	9.2562e+06	1.44915e+07	1.04527e+07	2.40286e+07	7.99385e+06	5.51979e+06	4.5306e+06	1.70558e+07	8.29821e+06	1.5665e+07	4.81094e+06	3.19458e+06	5.6242e+06	3.53419e+06	1.2979e+07	7.58596e+06	7.8694e+06	1.17318e+07	8.53001e+06
32	184.977	268.103	6.54852e+08	2.40263e+08	1.19717e+08	4.43501e+07	7.61026e+07	1.63824e+08	2.28718e+08	7.06235e+07	4.24207e+08	1.37636e+08	4.18912e+07	4.41008e+07	7.66524e+07	7.87012e+07	3.31306e+07	5.90375e+07	1.01308e+08	1.75736e+08	4.73367e+07	3.65116e+07	1.67398e+08	1.6166e+08	1.5792e+08
33	213.254	112.05	2.58794e+08	9.56026e+06	1.51084e+08	5.8335e+07	1.81568e+08	3.31108e+07	1.9596e+08	2.74689e+07	7.25935e+08	4.02874e+08	2.49845e+07	1.86985e+08	8.69837e+07	1.31808e+07	2.84393e+07	2.06836e+07	9.69724e+07	4.88407e+07	1.62322e+07	1.39354e+07	1.75995e+08	1.69123e+08	1.71027e+08
34	236.852	425.14	160856	442375	619062	185534	239674	394968	427967	387686	331720	219991	0	0	0	0	0	0	0	0	0	0	254253	292476	315595
35	295.764	445.108	4.79629e+06	2.62243e+06	3.62809e+06	1.90967e+06	9.45467e+06	3.69485e+06	3.41336e+06	7.59155e+06	4.59418e+06	4.96517e+06	779241	1.10594e+06	735236	823215	1.67212e+06	1.66536e+06	1.22395e+06	3.40923e+06	1.43082e+06	456062	4.50815e+06	4.4144e+06	5.35567e+06
36	580.86	72.0811	890462	1.42953e+06	570863	1.95222e+06	851248	195577	1.77698e+06	4.36284e+06	3.5306e+06	688068	1.09497e+06	1.14564e+06	1.94116e+06	9.22329e+06	1.87693e+06	439904	193081	3.68196e+06	416518	6.73724e+06	6.44449e+06	1.62112e+06	2.61142e+06
37	72.1517	73.0286	0	0	1.35241e+06	1.14444e+06	1.22988e+06	274645	205557	0	720239	3.23138e+06	142179	1.23419e+06	785962	0	735231	991780	533183	52616.7	981576	81010.3	783290	1.02102e+06	1.10477e+06
38	322.073	123.044	1.47435e+07	1.42769e+06	1.87847e+07	1.12229e+07	3.48403e+07	6.22705e+06	342047	710045	1.59076e+07	3.69906e+07	1.49309e+06	7.68046e+06	2.42995e+06	1.38408e+06	1.06674e+06	4.25022e+07	2.15736e+06	1.36888e+07	9.42666e+06	1.01093e+06	2.85887e+07	2.81373e+07	3.00286e+07
39	51.6595	110.06	9.50917e+06	4.04433e+06	7.66033e+06	6.97979e+06	3.88865e+06	1.26041e+07	6.62668e+06	6.14295e+06	7.1275e+06	1.10882e+07	1.07312e+07	1.581e+07	1.4299e+07	9.51373e+06	2.32609e+07	1.83734e+07	1.15051e+07	7.92939e+06	3.86909e+07	2.09477e+07	1.08887e+07	1.12119e+07	3.47858e+06
40	283.363	152.056	6.74025e+06	5.23933e+06	993700	1.46707e+06	3.30786e+07	886987	502159	6.48058e+06	1.37219e+06	1.47688e+07	1.26409e+06	5.89785e+06	4.41701e+06	4.02669e+06	5.71989e+06	6.21596e+06	5.47151e+06	3.68701e+07	3.17794e+07	2.44247e+07	1.02714e+07	1.12246e+07	9.92984e+06
41	427.294	377.104	1.11901e+06	441325	3.34235e+06	886101	1.91396e+06	462446	390359	800739	22057.8	194538	15595.1	35926.1	0	0	0	0	0	0	0	0	772096	610886	770674
42	581.756	89.1073	1.06864e+06	3.72983e+06	1.10831e+06	1.67392e+06	1.31143e+06	1.35646e+06	1.35607e+06	3.70919e+06	1.45045e+06	1.14842e+06	1.30007e+06	1.24372e+06	2.17469e+06	1.64118e+07	2.31088e+06	1.31479e+06	1.38036e+06	2.64168e+06	1.28177e+06	8.64876e+06	3.57045e+06	1.42903e+06	1.56878e+06
43	300.978	282.118	404615	5.91034e+06	8.18971e+06	2.68648e+06	9.19324e+06	234131	835324	3.46926e+06	3.91412e+06	2.86099e+06	1.8716e+06	1.4995e+07	1.71383e+07	2.8205e+06	1.59782e+06	4.06387e+06	1.08473e+06	4.58623e+06	7.13949e+06	3.54152e+07	6.1059e+06	5.70286e+06	5.78228e+06
44	70.5261	365.156	6.66939e+06	5.07765e+06	3.04859e+06	2.04819e+06	5.54565e+06	4.94622e+06	2.52864e+06	1.08811e+07	2.77222e+06	1.81314e+06	2.28947e+06	5.53417e+06	3.50778e+06	7.57158e+06	3.74904e+06	1.7484e+06	2.3478e+06	1.97273e+06	8.06345e+06	3.57363e+06	4.82247e+06	4.33913e+06	4.75721e+06
45	468.781	527.155	6.05043e+06	6.25172e+06	5.13486e+06	1.68153e+07	9.03426e+06	3.83015e+06	1.70955e+06	5.50462e+06	7.38032e+06	8.68595e+06	9.46575e+06	5.94907e+06	9.61751e+06	3.60064e+06	1.60367e+06	4.83714e+06	1.55691e+06	4.12743e+06	1.11103e+07	1.26901e+07	6.48097e+06	6.63511e+06	1.04264e+07
46	391.241	147.076	2.07311e+08	8.39837e+07	2.29686e+08	5.96649e+07	3.77815e+08	1.29936e+07	5.02214e+07	1.81762e+08	4.55538e+08	6.2882e+08	2.04698e+07	1.69055e+08	3.27327e+07	2.33299e+06	1.32201e+06	4.37628e+08	2.08795e+07	1.14918e+08	7.56906e+07	5.10046e+07	1.86597e+08	1.85515e+08	1.89445e+08
47	203.19	400.34	7.64931e+07	2.25646e+07	2.70935e+07	3.63999e+06	3.41377e+07	1.22832e+07	4.01452e+07	3.03258e+07	1.8861e+08	1.0836e+08	4.69852e+06	4.54259e+07	3.66886e+06	9.61418e+06	1.00882e+07	4.76225e+06	9.25711e+06	3.39345e+07	5.7465e+06	1.98252e+07	2.79547e+07	2.84927e+07	2.24816e+07
48	258.876	244.091	5.50375e+06	4.25158e+06	2.20778e+06	0	448096	3.17809e+06	1.37088e+06	3.65405e+06	1.0262e+06	863377	153092	223251	358882	944022	970670	344192	861449	182144	806028	281353	1.78346e+06	1.68392e+06	1.46772e+06
49	247.902	130.049	566010	114068	2.19413e+06	86856.9	1.08411e+07	2.0359e+06	368442	1.19342e+06	611233	2.35884e+06	246796	328648	160839	194678	73764.9	350166	128422	3.20001e+06	1.66071e+06	1.36625e+06	1.40963e+06	1.60287e+06	1.43461e+06
50	288.108	100.076	9.73974e+06	95462.5	120874	270334	1.42896e+06	3.04702e+06	4.18588e+06	259564	0	121398	1.74045e+06	385464	204305	613045	581426	475897	1.10487e+06	1.03447e+06	485521	424370	945042	1.49292e+06	1.57638e+06
51	408.829	97.0283	1.27499e+06	1.14497e+06	7.96222e+06	7.12177e+06	2.23664e+06	1.9642e+06	959679	1.87702e+06	804893	1.82613e+06	2.97424e+06	1.75399e+06	1.4491e+06	545619	1.15494e+06	2.10595e+06	286295	898058	2.06877e+06	3.29596e+06	2.85031e+06	4.14784e+06	2.50179e+06
52	416.593	156.076	6.28118e+07	538856	4.96611e+06	510576	2.03667e+08	299879	304934	2.79374e+06	1.64262e+08	1.46875e+08	766171	3.54528e+07	428618	656132	675179	1.07248e+08	234804	1.57543e+06	2.58016e+06	263424	3.93068e+07	3.81009e+07	4.04527e+07
53	155.117	154.097	4.46139e+06	1.13666e+06	4.94323e+06	3.4386e+09	4.78926e+07	2.28337e+06	1.52199e+09	1.3159e+06	1.42462e+06	3.54312e+06	4.60504e+08	1.75939e+07	1.9479e+06	2.65414e+06	1.68282e+06	1.422e+06	1.92536e+06	1.15294e+06	2.23532e+06	1.42907e+06	2.69901e+08	2.63348e+08	2.59672e+08
54	37.6902	108.081	284213	290398	424636	324556	419699	191027	256825	253728	145740	266386	9.2729e+06	7.48236e+06	3.18958e+06	9.11247e+06	1.78538e+06	5.13439e+06	4.78471e+06	1.99932e+06	4.90127e+06	3.67132e+06	2.42427e+06	1.83179e+06	2.387e+06
55	210.125	113.023	266352	2.07504e+06	4.46129e+06	2.56321e+06	2.02626e+06	657704	4.92994e+06	473453	1.54474e+06	3.80206e+06	0	0	0	0	0	0	0	56533.7	0	0	1.48013e+06	1.06109e+06	1.67613e+06
56	279.164	166.085	3.86437e+08	1.30175e+08	5.52605e+08	5.53048e+08	1.21959e+09	2.1623e+08	4.76111e+08	5.85631e+08	1.66259e+09	2.34782e+09	2.00585e+08	6.85512e+08	1.83133e+08	4.15084e+07	8.68321e+07	1.13392e+09	2.15248e+08	8.91053e+08	3.60466e+08	9.5739e+07	7.31195e+08	8.03496e+08	8.23118e+08
57	284.471	86.0965	1.17923e+08	4.94229e+07	7.24745e+07	7.0551e+07	3.27572e+08	2.5249e+07	9.12515e+07	8.03168e+07	4.77166e+08	6.48312e+08	3.06377e+07	2.7086e+08	4.15312e+07	1.07216e+07	1.79515e+07	2.85868e+08	6.55772e+07	1.89707e+08	7.81524e+07	2.41853e+07	1.90457e+08	1.78641e+08	1.88061e+08
58	4.81404	118.086	4.1329e+06	4.27846e+06	4.59023e+06	2.12942e+06	3.13362e+06	1.47971e+06	3.46844e+06	5.36392e+06	2.50805e+06	3.62149e+06	2.05475e+06	1.58363e+06	1.58639e+06	2.0468e+06	3.99557e+06	1.59539e+06	1.32389e+06	2.48209e+06	1.44361e+06	1.84443e+06	2.13459e+06	1.41365e+06	2.67947e+06
59	305.002	138.054	2.11806e+08	2.3445e+08	9.72463e+07	2.03504e+08	1.41732e+08	8.57074e+07	1.26893e+08	9.7336e+07	1.91906e+08	1.60936e+08	3.74479e+07	7.05002e+06	2.60072e+07	1.31867e+07	9.48734e+07	6.4536e+07	2.0063e+07	9.21719e+06	3.9614e+07	8.71447e+07	1.04105e+08	1.05246e+08	9.89583e+07
60	412.842	293.083	1.08762e+06	1.26898e+06	1.45769e+06	647558	1.07117e+06	1.14105e+06	1.51561e+06	1.23988e+06	1.10865e+06	1.39941e+06	824650	3.09139e+06	795207	407993	1.31004e+06	1.21117e+06	358852	2.152e+06	1.00797e+06	679302	1.09528e+06	1.10704e+06	1.16048e+06
61	324.322	284.099	243817	0	41731.8	129979	1.34151e+06	0	110178	75692.8	1.2384e+06	4.06251e+06	0	1.43853e+06	0	0	0	5.53665e+06	0	500058	145200	0	1.19225e+06	870493	775978
62	432.396	421.129	470849	201422	2.00943e+06	632181	1.00166e+06	230964	232625	408284	0	0	4459.33	0	0	0	0	0	11317.8	0	0	0	431650	407973	404965
63	353.062	134.08	3.88856e+06	4.26156e+06	8.88885e+06	7.08308e+06	3.08138e+06	4.1953e+06	5.56342e+06	4.53213e+06	7.22981e+06	4.82708e+06	1.67994e+06	1.22826e+06	1.33263e+06	963332	3.81784e+06	2.60956e+06	2.25849e+06	1.95655e+06	3.75497e+06	1.84096e+06	4.23666e+06	4.21383e+06	3.55316e+06
64	467.855	543.129	534044	846558	1.42821e+06	1.65707e+06	1.2442e+06	880303	167919	752684	1.39028e+06	577491	571632	339202	582547	132966	68853.7	769978	55845.8	278770	936809	692037	653142	641704	681367
65	446.421	85.0285	411356	256683	2.40352e+06	1.39578e+06	1.44999e+06	646346	374764	1.35836e+06	1.11066e+06	870534	27566.9	3.04338e+06	717764	110961	213279	1.78364e+06	261671	173518	1.00174e+06	524080	1.17116e+06	1.16428e+06	1.19702e+06
66	62.5244	146.059	2.39157e+06	3.40756e+06	1.73806e+06	3.08578e+06	915151	3.03583e+06	2.66981e+06	397047	4.05698e+06	2.75873e+06	990443	197897	0	387517	1.56835e+06	1.53763e+06	1.10893e+06	838508	1.72703e+06	1.03849e+06	1.52775e+06	1.34928e+06	1.64809e+06
67	305.973	175.107	3.51351e+06	1.15563e+06	5.56499e+06	1.13753e+07	1.57725e+07	691540	8.89954e+06	5.86011e+06	6.06071e+07	1.04472e+08	745118	3.54293e+07	1.83481e+06	86473.6	180571	3.92778e+07	4.1918e+06	1.06058e+07	2.88795e+06	859994	1.88428e+07	1.85845e+07	1.56742e+07
68	212.286	115.086	3.76231e+06	4.79806e+06	6.51969e+06	7.40627e+06	5.64793e+06	3.95384e+06	2.5707e+06	2.69302e+06	4.7532e+06	1.32329e+06	4.54152e+06	4.6487e+06	5.38205e+06	6.57034e+06	5.73497e+06	1.13578e+07	9.16628e+06	3.35048e+06	2.73452e+07	7.58417e+06	7.28552e+06	7.29543e+06	7.61879e+06
69	439.906	656.198	0	51228.7	233236	403461	132171	48185.7	0	447977	46574	0	358813	500294	989810	83190	79475.1	473201	1.15382e+06	227467	860094	629848	286970	243692	232840
70	196.945	146.117	2.17698e+07	2.75552e+06	5.19572e+06	1.54438e+06	3.57825e+06	4.5939e+07	2.45803e+08	2.76597e+06	5.30058e+06	5.5415e+06	4.26189e+07	2.90679e+07	2.88432e+07	5.73942e+07	1.7014e+07	8.3613e+07	2.65328e+07	3.76821e+07	1.0539e+08	4.64085e+07	4.63162e+07	4.3168e+07	4.2414e+07
71	34.3859	99.0439	1.93575e+06	1.62707e+06	451230	1.10692e+06	570283	2.46901e+06	941380	1.03674e+06	72742.6	160814	8.65159e+06	7.03183e+06	5.235e+06	5.61249e+06	1.23401e+07	1.15316e+07	3.57898e+06	9.57063e+06	5.37802e+06	5.11747e+06	5.34012e+06	4.49021e+06	2.85415e+06
72	376.575	289.088	1.09625e+07	5.89165e+06	5.57557e+06	3.32689e+06	7.36688e+06	360002	329940	5.92525e+06	3.30868e+06	1.29727e+06	2.73682e+06	166305	1.56416e+06	1.18339e+06	1.053e+06	1.59836e+06	2.63635e+06	88756.3	1.3521e+06	1.29397e+06	260249	4.75238e+06	2.50648e+06
73	508.837	689.207	103842	57476.6	2.9071e+06	293023	381808	254649	6630.87	543590	1.50736e+06	1.34851e+06	29496.8	1.94719e+06	78483.9	51877.5	0	2.6343e+06	0	33659.7	613732	20048.6	1.37319e+06	1.69035e+06	1.226e+06
74	303.182	541.223	297561	32096.1	315288	0	150318	143611	155926	115069	46664.1	0	295924	690118	138924	221163	105245	371256	140381	234736	590594	108315	157489	126300	168697
75	28.127	134.059	3.45842e+06	1.9382e+06	2.55764e+06	726635	6.03931e+06	5.27763e+06	1.21395e+06	857873	1.12959e+06	1.42835e+06	552399	396585	591697	1.04822e+06	816844	317565	863243	3.96282e+06	1.47006e+06	2.67745e+06	1.88224e+06	1.81493e+06	1.85224e+06
76	715.816	102.128	5.51045e+06	1.3408e+07	5.41065e+06	7.81691e+06	9.76896e+06	2.83331e+06	4.41933e+06	8.86123e+06	4.88735e+06	8.49442e+06	6.01843e+06	8.13893e+06	5.53048e+06	6.0888e+06	5.19106e+06	2.55061e+06	2.39929e+06	1.21303e+07	4.51928e+06	4.44204e+06	1.34863e+06	8.52476e+06	1.19926e+07
77	203.168	126.066	7.38988e+07	1.08423e+07	2.41572e+07	1.39771e+07	1.74242e+07	1.56314e+07	4.91738e+07	6.8178e+06	1.28337e+07	2.01248e+07	1.10156e+07	7.92366e+06	8.00726e+06	5.6771e+06	7.02506e+06	4.74444e+06	1.13402e+07	1.18742e+07	9.09399e+06	9.15701e+06	9.39908e+06	8.64209e+06	8.77545e+06
78	358.024	303.103	0	0	64441.2	0	0	17056.3	0	0	0	153634	74869.7	446068	77431.7	43765.3	196064	122363	59809	135662	207702	154564	31568.9	11981.4	50320.4
79	149.425	252.107	1.84111e+08	1.11129e+07	1.44303e+08	2.58628e+06	1.37532e+07	1.80629e+07	4.3233e+07	3.06648e+07	1.53592e+08	5.34473e+07	4.41498e+06	6.23468e+06	5.31796e+06	4.30112e+06	2.14542e+06	4.37512e+06	4.11596e+06	3.07173e+06	5.07466e+06	879664	4.25739e+07	4.10553e+07	4.00058e+07
80	50.3781	124.075	1.06837e+07	4.13647e+06	6.87807e+06	5.12969e+06	4.05651e+06	5.56743e+06	7.03625e+06	6.71449e+06	6.24217e+06	9.42994e+06	2.48201e+08	1.68829e+08	1.48033e+08	1.32818e+08	1.83545e+08	2.01981e+08	1.67709e+08	1.32286e+08	1.77444e+08	1.5903e+08	6.4257e+07	6.42591e+07	6.22528e+07
81	305.989	187.057	2.4901e+06	1.99088e+06	1.36001e+06	1.37381e+06	1.7921e+06	2.63496e+06	1.28445e+06	3.91249e+06	438368	581715	3.58935e+06	6.31912e+06	4.74237e+06	3.86556e+06	1.33937e+06	1.21359e+06	2.76013e+06	1.41157e+06	4.79414e+06	4.6454e+06	2.35696e+06	2.45565e+06	1.9473e+06
82	305.216	139.057	1.44446e+07	1.63626e+07	8.03747e+06	1.39759e+07	9.292e+06	6.17584e+06	8.24386e+06	7.27311e+06	1.38861e+07	1.09939e+07	2.37121e+06	0	1.12266e+07	1.9192e+07	5.83055e+06	3.96163e+06	9.84193e+06	3.58732e+06	2.58319e+06	5.62841e+06	7.37799e+06	6.80251e+06	6.47951e+06
83	461.166	365.104	257375	110108	453232	488595	296301	274010	208181	326783	151728	197866	245794	108854	70144.6	79667.6	111786	116033	28251.7	103231	150814	288842	404261	147524	333747
84	323.781	417.15	0	124645	0	302192	51565.6	133759	0	0	0	75427.9	428595	1.34667e+06	492490	299194	43303.5	598232	202411	84424.8	1.84417e+06	1.98753e+06	338372	105922	241826
85	35.2227	83.0492	0	129401	0	0	87087.4	0	0	0	316750	0	4.34694e+06	3.16095e+06	2.81319e+06	4.48315e+06	3.80698e+06	5.07406e+06	2.4659e+06	1.8799e+06	4.07362e+06	3.06192e+06	1.13122e+06	1.36048e+06	1.49821e+06
86	376.554	146.091	6.86397e+07	2.1042e+06	6.21756e+07	6.91955e+07	3.54984e+07	2.35573e+07	7.05227e+07	5.55085e+07	8.16748e+07	1.32256e+08	2.31021e+07	3.98594e+07	1.21742e+08	9.98932e+07	2.86493e+07	1.9882e+08	3.43579e+07	5.60378e+07	1.77003e+08	5.27119e+07	8.46489e+07	7.91407e+07	8.15517e+07
87	353.001	314.073	95031.4	0	661076	0	431251	328561	87543.5	84551.2	1.43335e+06	3.32473e+06	26586.3	784084	45530.6	0	0	962619	61111.4	389706	39566.5	0	451635	466049	460621
88	269.154	393.114	934752	882872	1.44664e+06	313172	603494	1.06538e+06	1.10311e+06	590629	455795	1.27373e+06	0	0	0	0	0	0	0	0	0	0	471234	374851	665303
89	374.127	349.087	770449	792261	448997	314713	803691	405724	396315	859539	584607	123009	38755.2	0	0	0	0	36248.4	54917.3	118074	20699.8	0	234899	231116	238027
90	207.703	190.049	9.66654e+06	223077	1.17531e+06	1.3092e+06	513871	1.21672e+06	264161	100492	0	723731	142211	55765.1	227487	183531	44138.3	888855	158883	511939	936130	753057	1.10052e+06	1.22642e+06	1.14871e+06
91	269.219	377.139	3.07882e+06	2.94625e+06	5.7367e+06	1.98979e+06	2.67691e+06	6.52896e+06	5.77814e+06	2.48196e+06	2.70495e+06	5.31678e+06	0	0	0	0	291835	0	98901.4	0	0	0	2.57038e+06	2.50109e+06	2.82143e+06
92	398.196	353.082	2.33861e+06	1.28066e+06	1.02626e+06	397381	926203	1.07854e+06	1.16753e+06	902683	2.13112e+06	572324	0	0	0	0	0	0	0	0	0	0	710540	731716	893779
93	229.745	769.414	0	0	0	0	0	0	0	0	0	0	741275	1.59407e+06	960345	1.3107e+06	854158	668371	1.16057e+06	577064	1.1605e+06	820355	424627	344629	239931
94	237.161	152.106	878067	2.26232e+06	1.25832e+06	285521	605850	756725	1.23944e+06	583199	573388	2.02487e+06	4.47942e+06	3.51562e+06	2.30505e+06	6.26071e+06	1.15882e+07	8.62674e+06	1.05043e+07	1.08737e+07	2.61259e+06	3.4203e+06	631279	2.51464e+06	1.82166e+06
95	284.337	385.087	974951	2.53477e+06	818713	977174	5.22133e+06	975215	210441	734695	4.37267e+06	3.81576e+06	0	0	0	0	0	0	0	0	0	0	1.23842e+06	845391	1.25355e+06
96	64.2825	164.092	9.01336e+07	279450	1.17435e+06	135300	1.48346e+06	1.44379e+07	1.74848e+07	4.91559e+06	2.0694e+06	6.32939e+06	579870	1.72908e+06	162828	576454	468553	803362	235267	930157	974716	421521	7.49603e+06	7.57825e+06	7.59386e+06
97	223.726	194.116	299945	3.80692e+06	480130	195949	101626	386003	435954	58542.1	125847	423098	1.64411e+06	1.37728e+06	1.33575e+06	611529	1.61779e+06	2.83693e+06	1.91389e+06	1.75997e+06	2.86359e+06	962001	1.17571e+06	1.04621e+06	948715
98	394.084	106.05	5.07425e+06	4.53314e+06	1.36351e+07	4.55522e+06	2.09567e+07	1.33013e+06	5.41951e+06	9.73258e+06	6.69729e+07	9.86285e+07	398195	1.06301e+07	328760	40046.9	0	3.37075e+07	46131.3	3.90603e+06	2.94198e+06	149324	1.61543e+07	1.55607e+07	1.539e+07
99	395.927	133.06	1.27739e+07	1.27218e+06	9.81625e+06	1.08513e+06	1.59777e+07	835960	2.48714e+06	3.10414e+06	5.83352e+07	2.57461e+08	117305	7.54538e+06	164602	194459	158139	4.61151e+07	279929	3.68436e+06	3.40626e+06	655151	1.75527e+07	1.74809e+07	1.74147e+07
100	263.324	467.223	0	0	0	52816.6	0	0	54590.9	0	0	0	804005	514624	683004	658265	276535	548886	538151	1.32771e+06	1.11493e+06	94411.5	547961	269811	251892
101	113.878	423.217	108275	678072	0	69756.3	273954	129793	0	95482.4	354867	405165	1.10036e+06	4.76761e+06	2.99458e+06	5.95275e+06	1.0637e+06	939643	493508	517423	3.87277e+06	1.69528e+06	1.23375e+06	1.0505e+06	815871
102	118.693	282.277	1.61695e+07	1.13396e+06	3.90835e+06	1.0588e+06	1.07196e+07	4.11929e+06	9.48046e+06	5.69288e+06	1.67052e+07	1.17357e+07	2.18434e+07	9.79318e+06	908492	232462	1.7954e+07	1.96689e+07	2.80211e+07	3.17508e+07	2.13411e+06	1.42618e+06	9.59298e+06	1.07796e+07	1.04705e+07
103	100.15	86.0601	5.57536e+06	3.46639e+06	4.07677e+06	7.06859e+06	7.22e+06	1.03542e+07	6.6233e+07	5.11041e+06	4.76628e+06	4.37563e+06	4.1463e+06	4.72065e+06	7.50835e+06	4.76982e+06	3.18454e+06	3.24149e+06	7.58378e+06	7.90495e+06	4.9636e+06	5.66089e+06	6.43139e+06	5.18406e+06	6.4737e+06
104	348.418	76.0759	6.55283e+06	2.54002e+06	8.36281e+06	1.32155e+06	9.61386e+06	1.97451e+07	2.39826e+06	8.77077e+06	2.51273e+06	1.1866e+07	933165	4.36563e+06	3.45254e+06	4.45117e+06	1.08697e+07	4.23455e+06	1.70288e+06	1.84774e+07	5.3268e+06	1.37199e+07	7.46665e+06	7.16773e+06	7.68813e+06
105	155.974	386.34	62178.5	359830	876383	0	0	277452	197110	759812	4.28554e+07	0	167035	0	0	57932.3	50642.4	44018.4	126639	97057.7	0	46262	2.5079e+06	2.40733e+06	2.52521e+06
106	345.015	371.072	1.34142e+06	688391	2.413e+06	537198	1.17884e+06	1.4413e+06	1.11571e+06	1.57123e+06	1.08669e+06	1.14905e+06	0	32074.9	0	0	9936.56	38535	0	105759	0	0	769481	809622	783713
107	268.945	289.121	1.52813e+06	210544	3.9949e+06	384538	341039	868957	273272	340119	1.22128e+06	398958	114998	41797.2	0	98163.3	203439	397734	93255	95722.3	450719	42302.2	736211	561897	697859
108	285.795	275.109	2.86142e+06	2.16035e+06	102156	514008	1.9485e+06	2.33702e+06	0	327602	1.36787e+06	448957	505468	1.84021e+06	1.01116e+06	2.87871e+06	2.61093e+06	1.33878e+06	4.60109e+06	1.38581e+06	1.04496e+06	2.2344e+06	1.29152e+06	1.19029e+06	961463
109	388.602	95.0604	1.02947e+06	1.5938e+06	662051	1.44888e+08	1.11211e+06	627925	1.73508e+08	1.20887e+06	2.5786e+06	1.97185e+06	1.70156e+08	1.63628e+08	2.75579e+06	3.8355e+07	3.09397e+07	4.74964e+06	1.78614e+06	655789	6.25676e+06	5.92046e+06	5.65959e+07	5.30505e+07	5.56119e+07
110	390.169	87.0441	1.71775e+07	1.31352e+07	3.69118e+07	1.62792e+07	7.2868e+06	6.31429e+07	3.59555e+07	5.03021e+07	1.71174e+07	1.32978e+07	3.89695e+06	1.27879e+06	4.53346e+06	1.76877e+06	3.42513e+07	5.58379e+06	6.4661e+06	3.77844e+06	1.12562e+07	8.84455e+06	2.19498e+07	1.98684e+07	2.09751e+07
111	339.267	655.27	0	0	0	0	0	0	0	0	138646	0	332205	660576	171299	26730.9	194283	680139	145522	368029	290242	51331	76396.5	91534.9	28067.9
112	498.089	184.072	1.80452e+07	9.24671e+06	5.95192e+06	9.10121e+06	1.76836e+07	866254	2.4036e+06	2.39585e+06	5.07898e+07	2.56148e+07	5.87364e+06	4.07667e+06	2.64722e+06	1.26224e+06	1.76752e+06	2.88854e+07	1.53283e+06	2.25967e+07	3.91858e+06	2.31366e+06	1.06547e+07	1.09582e+07	9.33467e+06
113	99.496	133.101	3.49798e+06	1.3128e+06	3.00554e+06	2.16908e+06	1.98148e+06	3.1114e+07	1.96118e+06	2.98096e+06	2.81354e+06	3.61541e+06	3.73469e+07	1.96615e+07	3.74209e+07	1.18189e+07	3.21659e+07	1.17221e+08	3.5116e+07	9.66994e+07	2.66887e+07	4.61925e+07	3.06863e+07	2.65206e+07	2.50774e+07
114	388.644	112.087	2.90997e+06	3.37044e+06	770512	4.60644e+08	3.61151e+06	827513	5.1629e+08	3.16303e+06	8.59131e+06	6.31627e+06	5.36194e+08	5.04235e+08	1.08482e+07	1.20291e+08	9.42472e+07	1.62639e+07	7.2691e+06	5.43028e+06	2.23307e+07	2.04704e+07	1.83418e+08	1.66207e+08	1.76183e+08
115	238.874	413.14	1.53268e+06	1.73098e+06	251878	1.22982e+06	991277	2.22519e+06	1.34554e+06	1.04322e+06	812531	871353	1.09941e+06	2.35204e+06	3.93214e+06	3.62539e+06	6.09361e+06	2.00905e+06	5.13474e+06	2.61905e+06	2.00461e+06	2.40626e+06	1.55302e+06	1.32036e+06	1.51364e+06
116	291.316	144.101	1.52695e+08	3.251e+07	1.22867e+07	3.86452e+06	3.4139e+07	1.07031e+08	1.58913e+07	1.25237e+08	4.91819e+06	1.04997e+07	6.06178e+06	4.9405e+07	5.70359e+06	1.36494e+07	1.4403e+06	1.5311e+07	5.88286e+06	5.50011e+06	5.8482e+07	1.24413e+07	2.14777e+07	2.18911e+07	1.96191e+07
117	352.978	126.102	772667	1.76747e+06	2.18556e+06	1.09966e+08	719044	1.18683e+06	9.97212e+07	2.30454e+06	1.46714e+06	1.868e+06	7.20962e+07	4.98923e+06	1.65691e+06	1.39092e+07	8.16616e+06	1.28701e+06	1.17076e+06	1.47743e+06	1.58709e+06	6.85174e+06	1.33795e+07	1.28018e+07	1.34808e+07
118	341.094	299.109	0	0	52993.9	14891.3	15317	69291.6	0	13698.2	35409.1	42697.7	90302.7	3.85549e+06	124216	0	29860.4	0	108502	1.4197e+06	293198	46517.2	340794	218609	269542
119	36.5323	164.106	112067	130110	111576	25349.2	265701	173797	145234	76479.8	322596	0	1.3601e+06	4.79191e+06	3.58161e+06	5.05594e+06	3.44161e+06	3.99114e+06	2.32083e+06	2.97503e+06	4.55378e+06	3.9027e+06	971087	1.09189e+06	1.12042e+06
120	236.002	377.143	1.73719e+06	0	118469	261182	77998.5	109209	0	0	508203	381125	40560	342249	95368.3	22482.1	0	456240	47799	76435.3	28980.4	42863.5	274762	277227	206887
121	31.743	105.07	2.83862e+06	4.80136e+06	1.94611e+06	1.82812e+06	1.792e+06	2.03277e+06	2.20233e+06	3.56387e+06	1.98799e+06	2.23112e+06	1.85508e+07	1.15656e+07	1.29411e+07	1.82072e+07	1.53012e+07	2.39649e+07	1.09316e+07	9.21523e+06	1.39797e+07	1.23436e+07	9.50813e+06	7.74904e+06	1.34289e+07
122	256.551	463.118	679773	550726	599760	277473	857701	426004	844279	806495	486886	264214	0	0	0	0	0	0	0	0	0	0	563851	329809	419808
123	194.598	132.101	3.79284e+08	6.16494e+08	1.64828e+08	8.65349e+08	9.11117e+07	4.65026e+07	2.62819e+08	8.60272e+07	1.44502e+08	2.58103e+08	3.9337e+06	1.63551e+06	2.62926e+06	2.27765e+06	3.81558e+06	2.88185e+06	1.67651e+06	2.78365e+06	2.13334e+06	1.81339e+06	1.16562e+08	1.19254e+08	1.23832e+08
124	156.769	475.249	0	0	51776.8	0	0	0	0	101778	0	79564.3	4.16352e+06	1.13634e+07	6.57556e+06	9.07946e+06	4.05915e+06	1.99834e+06	5.2642e+06	2.91578e+06	1.02971e+07	5.96526e+06	2.48072e+06	3.18492e+06	2.56334e+06
125	205.138	166.072	4.47424e+07	1.36785e+07	3.5825e+07	3.41772e+07	3.42917e+07	3.2532e+07	4.09934e+07	7.47484e+06	2.02733e+07	2.48271e+07	1.23402e+07	3.0125e+07	1.60689e+07	7.90551e+06	9.46537e+06	1.59415e+07	3.53259e+06	1.29521e+07	1.25081e+07	2.49657e+07	1.75457e+07	2.83077e+07	2.20665e+07
126	96.0118	151.061	1.86283e+07	9.95471e+06	1.35974e+07	2.4061e+07	6.02013e+07	5.18654e+07	2.0556e+07	2.80367e+07	1.17751e+07	1.81572e+07	0	5.64105e+06	704636	0	3.78252e+06	3.35384e+06	1.1201e+06	8.71035e+06	0	1.47159e+07	1.17324e+07	1.27019e+07	1.35735e+07
127	198.882	126.021	6.30378e+06	143932	0	0	1.2899e+06	2.78154e+06	4.38719e+06	2.63542e+06	831474	0	0	2.07336e+06	83729.7	0	630337	101662	1.45448e+06	1.33613e+06	0	0	273183	363869	228164
128	292.127	130.086	1.59569e+06	147644	1.14176e+06	229544	3.70139e+06	945106	477846	1.88934e+07	1.9953e+06	1.04385e+07	1.79382e+06	2.31006e+07	4.01634e+06	4.30043e+06	1.7708e+06	1.75239e+07	2.2094e+06	2.89729e+06	7.6286e+06	2.11635e+06	2.57894e+06	2.7977e+06	3.14569e+06
129	33.4203	255.23	1.9907e+06	6.94195e+06	3.09625e+06	2.09229e+06	1.73891e+06	2.69175e+06	2.40424e+06	3.70931e+06	828763	876281	1.17267e+07	2.50036e+07	2.77189e+07	4.15679e+07	1.73989e+07	1.1347e+07	1.80412e+07	1.79602e+07	2.78325e+07	2.85219e+07	1.21898e+07	1.06255e+07	1.10818e+07
130	254.082	203.138	4.50807e+07	4.49308e+06	2.59844e+07	4.46995e+07	5.66729e+07	9.60604e+06	1.24338e+07	6.00274e+06	3.41471e+07	3.43088e+07	2.5931e+06	1.703e+07	1.86331e+06	95617.5	346750	3.01568e+07	154253	1.02292e+07	9.9036e+06	1.62488e+06	2.45678e+07	2.20017e+07	1.80098e+07
131	339.083	293.061	3.25961e+06	323348	7.86011e+06	3.3253e+06	2.74698e+06	5.18634e+06	5.15773e+06	3.12518e+06	2.36938e+06	2.06614e+06	3.73331e+06	8.8038e+06	3.58196e+06	1.55041e+06	1.01162e+07	8.78397e+06	1.15758e+06	2.58825e+06	6.15367e+06	4.25471e+06	5.00166e+06	3.87366e+06	3.76943e+06
132	77.2861	140.07	7.40285e+06	4.26538e+06	1.15423e+07	6.45909e+06	3.79116e+06	1.51029e+06	1.09038e+07	3.70598e+06	3.95248e+06	7.86256e+06	2.06968e+07	1.25763e+07	1.14891e+07	1.45709e+07	1.58144e+07	2.16538e+07	1.22719e+07	1.07457e+07	2.51327e+07	1.49997e+07	1.52016e+07	9.41056e+06	1.0906e+07
133	251.786	162.075	1.66447e+06	1.82054e+06	1.59059e+06	1.38721e+06	1.20433e+06	1.47421e+06	1.16666e+06	1.53927e+06	1.65999e+07	1.43969e+09	728456	3.28324e+06	892817	853257	1.1553e+06	661322	513160	800094	697075	1.405e+06	954586	978907	1.61627e+06
134	343.133	131.117	1.65635e+07	2.7229e+07	3.38199e+07	2.38192e+08	1.66644e+07	5.09276e+07	1.17367e+08	1.23593e+07	1.96662e+07	5.13747e+07	5.57791e+07	5.34585e+07	1.94864e+07	1.13412e+07	801758	6.91312e+06	5.43013e+06	3.17757e+06	1.49689e+07	5.64856e+07	4.36248e+07	4.24355e+07	4.2626e+07
135	306.815	409.145	0	0	61460.3	24258.2	47040.2	22286.2	23859.7	159371	0	0	194665	312955	194792	119191	112155	0	165673	93483	304502	152444	117838	47329.9	135901
136	85.3301	74.0603	1.50963e+07	1.60938e+07	3.91282e+07	2.58526e+07	1.72448e+07	5.10207e+06	3.14861e+07	1.83513e+07	2.08785e+07	8.41387e+07	5.04544e+06	8.38263e+06	9.13197e+06	6.75613e+06	1.05845e+07	5.74704e+06	2.2483e+06	1.09593e+07	3.62135e+06	9.00184e+06	1.93056e+07	1.64394e+07	2.15323e+07
137	255.073	240.122	2.20501e+06	233960	302510	104164	19490.9	973811	170076	108808	137901	0	777438	623109	321556	0	995802	1.39952e+06	837249	766734	1.19839e+06	679935	483144	466041	266313
138	481.742	365.104	183080	96739.3	479744	827016	223381	211967	249834	267234	98417.1	319565	181511	338236	86484.7	30283	76446.9	689204	8534.81	140703	350565	216378	429582	407336	433737
139	315.896	106.086	1.52551e+07	1.58264e+07	1.92758e+07	7.85824e+06	6.97441e+06	1.5842e+07	1.55713e+07	1.81761e+07	1.72593e+07	8.06712e+06	1.30956e+07	4.81077e+06	1.03858e+07	1.86311e+07	1.55707e+07	8.16631e+06	1.67179e+07	1.57018e+07	2.04633e+07	2.46234e+07	1.43281e+07	1.40227e+07	1.33453e+07
140	268.268	253.117	9.81015e+06	701617	1.16139e+07	2.76646e+07	4.86299e+07	2.09579e+06	9.24413e+06	6.82029e+06	5.93696e+07	4.28038e+07	1.16614e+06	4.77584e+07	1.24057e+06	780774	197857	7.54722e+06	3.38588e+06	2.24448e+07	9.86627e+06	952384	2.95722e+07	2.30735e+07	2.36184e+07
141	219.169	298.113	8.64856e+06	1.55861e+06	1.17742e+06	933212	2.0463e+06	153900	1.76465e+06	1.11123e+06	3.44125e+06	2.21342e+06	88511.2	4.41982e+06	1.1113e+06	0	76785.1	2.70963e+06	114508	750335	1.58349e+06	2.04819e+06	2.05636e+06	2.08909e+06	2.20856e+06
142	237.067	917.464	0	0	0	0	0	0	0	0	0	0	172583	376097	146855	227988	108023	95178.1	82265.6	65614.7	459955	229527	179520	151597	63700.5
143	272.033	203.051	887636	2.34034e+07	1.99765e+07	2.31477e+07	2.751e+07	1.41784e+07	1.80827e+07	4.79454e+07	2.94315e+07	7.26722e+06	2.79594e+07	2.63109e+06	4.93512e+07	4.30356e+07	5.82463e+07	1.15655e+07	3.86041e+07	2.00942e+07	1.92172e+07	2.24777e+07	2.3224e+07	2.16086e+07	2.13895e+07
144	343.821	427.097	947287	492439	566491	508337	657221	408967	913002	272456	161320	400046	0	58762.2	0	0	9024.25	0	0	76595.3	0	0	342457	327543	299523
145	195.386	95.0491	784333	3.84452e+06	3.81599e+06	5.32485e+06	4.05795e+06	2.80037e+06	5.28616e+06	1.17272e+06	3.59602e+06	2.49676e+06	0	0	0	0	2.03257e+06	0	558218	0	0	0	475409	1.08909e+06	908069
146	187.025	334.147	501967	2.90034e+06	1.47641e+06	2.7333e+06	1.5486e+06	1.64522e+06	2.13205e+06	191573	55983.4	583538	1.23174e+06	807308	1.2314e+06	4.46398e+06	3.6105e+06	1.41227e+06	2.33554e+06	2.70383e+06	3.70319e+06	1.36712e+06	1.42493e+06	1.42548e+06	1.5878e+06
147	186.098	222.147	1.22824e+06	1.13016e+06	371404	858343	2.17184e+06	999257	1.97937e+06	939775	2.19303e+06	1.38679e+06	2.61739e+06	2.46912e+06	2.89318e+06	2.24995e+06	3.84637e+06	4.66073e+06	2.25804e+06	2.84437e+06	3.68276e+06	2.58577e+06	1.31589e+06	1.43305e+06	1.97536e+06
148	414.092	577.149	206558	28085.4	0	82928	311274	330464	445030	7869.34	0	34006.2	0	0	0	0	0	0	0	0	0	0	93753.2	37091.6	33568.7
149	371.997	421.166	6.86154e+06	5.49254e+06	4.0261e+06	2.09875e+06	6.36879e+06	3.40137e+06	2.85526e+06	6.07049e+06	1.30819e+06	0	219840	0	95652.5	39750.9	312777	40195.9	648059	337985	0	0	1.57898e+06	1.70626e+06	872848
150	272.172	137.059	1.11678e+07	5.30372e+06	2.38216e+07	1.13497e+07	1.03937e+07	9.10626e+06	1.29899e+07	7.44174e+06	7.89609e+06	1.19175e+07	358469	89999.8	102832	203362	0	551865	74825.4	0	0	43461.4	7.32669e+06	7.65873e+06	6.16459e+06
151	283.089	441.207	0	34705.8	0	0	0	137255	0	0	0	0	1.42207e+07	1.14838e+07	5.51543e+06	2.477e+06	4.01309e+06	5.11714e+06	6.47828e+06	2.36099e+07	3.4689e+06	1.15891e+06	930153	1.93535e+06	910543
152	58.4147	97.0647	702406	267424	546570	220422	222820	2.10424e+06	341030	2.75481e+06	0	294918	1.02332e+07	6.10382e+06	8.2307e+06	8.04003e+06	7.89536e+06	1.17388e+07	6.21321e+06	1.22682e+07	1.07192e+07	9.4336e+06	4.26035e+06	3.70663e+06	3.76967e+06
153	238.077	569.29	0	0	0	0	0	0	0	65436.4	0	0	1.0472e+06	1.09466e+06	357574	532033	409810	955261	514303	492490	501337	160235	141232	107021	66129.8
154	251.117	481.239	0	10287.3	0	0	0	0	0	0	33173.6	0	655192	625431	606274	443917	120994	663873	402010	940506	696280	29762.1	465908	459076	208523
155	266.579	471.197	0	156144	142087	153289	237258	97844.4	0	0	134822	0	1.56144e+07	8.69085e+06	8.01576e+06	8.42442e+06	1.52414e+06	1.09782e+07	5.31309e+06	2.20176e+07	1.41452e+07	1.47089e+06	6.58811e+06	5.96271e+06	6.07781e+06
156	80.6557	453.206	1.15096e+07	6.77625e+06	4.20577e+06	2.45749e+06	6.29213e+06	4.75191e+06	3.69633e+06	1.16902e+07	2.72208e+06	3.8618e+06	2.38128e+06	4.07759e+06	3.34297e+06	4.44042e+06	2.31545e+06	1.04485e+06	1.73091e+06	2.15375e+06	6.24755e+06	1.47973e+06	6.09775e+06	3.90552e+06	5.45355e+06
157	65.1552	321.129	2.59546e+06	2.53646e+06	522034	605137	2.87455e+06	2.9482e+06	1.10515e+06	6.78175e+06	1.4744e+06	975325	2.50256e+06	5.95321e+06	3.19212e+06	6.70263e+06	3.51431e+06	953275	2.71061e+06	1.85236e+06	6.93544e+06	3.11969e+06	2.88133e+06	2.57267e+06	3.11978e+06
158	196.928	87.0441	1.46826e+06	0	0	0	0	3.38678e+06	1.73503e+07	0	0	0	2.93433e+06	1.99252e+06	2.03853e+06	4.43415e+06	0	6.2702e+06	0	1.23941e+06	7.64679e+06	3.12902e+06	2.75567e+06	3.01344e+06	2.7229e+06
159	90.8433	116.107	7.52838e+06	2.38081e+06	2.8589e+06	4.23336e+06	1.75789e+06	1.20029e+06	4.86464e+06	1.78984e+06	3.25208e+06	7.43234e+06	1.57804e+07	9.21107e+06	1.46247e+07	6.08209e+07	7.7638e+06	1.42261e+07	7.38355e+06	3.6179e+07	2.25888e+07	2.9668e+07	8.3556e+06	8.35062e+06	7.99674e+06
160	183.446	114.066	2.90113e+09	9.51974e+08	3.25365e+09	2.36437e+09	5.66379e+09	3.74995e+09	2.54723e+09	4.09802e+09	4.81988e+09	4.05486e+09	1.38306e+09	3.93426e+09	2.69287e+09	1.58776e+09	5.873e+08	2.40541e+09	1.39768e+09	3.05569e+09	2.70656e+09	4.62949e+09	3.38108e+09	3.32035e+09	3.29977e+09
161	56.7142	118.065	1.10801e+07	6.3069e+06	1.03118e+07	7.96253e+06	6.86739e+06	6.05908e+06	6.88093e+06	5.1007e+06	1.08339e+07	2.1248e+07	1.45613e+07	2.7616e+07	1.10054e+07	1.38112e+07	2.87938e+07	1.45462e+07	1.16394e+07	1.6681e+07	1.51784e+07	1.35429e+07	1.26536e+07	2.24968e+07	1.29891e+07
162	372.877	132.076	5.54929e+07	3.00532e+07	4.84324e+07	2.73436e+07	7.2759e+07	2.06744e+07	4.96844e+07	7.12832e+07	2.17093e+08	4.82175e+07	4.9809e+07	4.85529e+07	3.33121e+07	1.64128e+07	9.2493e+06	9.21106e+07	4.56616e+07	1.20995e+08	4.0233e+07	1.38567e+07	8.76207e+07	8.78261e+07	4.08635e+07
163	314.775	141.113	1.45983e+07	3.15095e+07	8.84019e+06	1.15778e+07	1.99456e+07	1.52093e+07	2.27688e+07	1.58902e+07	1.21507e+07	1.05861e+07	5.04368e+06	1.22163e+07	3.15514e+07	1.15896e+07	8.51625e+06	1.19374e+07	1.73065e+07	8.11279e+06	4.05489e+06	1.95824e+07	1.36447e+07	4.90689e+06	1.18415e+07
164	34.9875	125.096	822241	541032	269713	639690	543823	383059	436573	733398	272634	451233	1.01613e+07	9.24334e+06	1.53526e+07	2.40988e+07	1.82642e+07	2.45357e+07	8.93535e+06	1.65402e+07	1.9871e+07	1.70298e+07	8.61896e+06	5.77701e+06	9.17575e+06
165	37.0081	187.132	175440	201719	43280.5	501225	206428	144323	351518	456160	0	0	5.45037e+06	1.47405e+07	1.13433e+07	1.73627e+07	7.84597e+06	5.26026e+06	9.04344e+06	5.15066e+06	1.41159e+07	7.89742e+06	4.64986e+06	4.84511e+06	5.29464e+06
166	249.397	263.051	8.73888e+06	1.98065e+06	3.05813e+06	4.56428e+06	8.05886e+06	2.05323e+06	1.12993e+07	5.6405e+06	4.81485e+06	2.51463e+06	305223	524772	445375	1.16245e+06	2.9093e+06	2.50762e+06	133891	342388	1.29991e+06	452005	7.6648e+06	5.58277e+06	8.19651e+06
167	194.742	127.074	297668	971820	721063	0	1.10607e+06	334835	1.91687e+06	720029	1.45851e+06	3.22591e+06	4.87875e+06	896218	644503	980636	2.20208e+06	2.74446e+06	637676	1.8601e+06	1.56743e+06	731774	785587	435372	828762
168	452.432	148.059	2.02706e+06	2.38111e+06	4.06788e+06	3.69062e+06	5.32321e+06	2.04757e+06	2.62022e+06	3.51244e+06	1.34057e+07	1.17103e+07	2.84023e+06	7.61509e+06	2.54934e+06	1.09789e+06	858014	6.48533e+06	2.40134e+06	5.0465e+06	1.90104e+06	1.02036e+06	6.15388e+06	6.74662e+06	4.28115e+06
169	47.0305	152.106	681472	457501	850810	770598	105728	642927	717668	531874	355639	705157	3.54187e+06	5.01263e+06	3.69808e+06	3.93329e+06	3.06768e+06	3.25327e+06	2.62511e+06	3.79301e+06	5.69563e+06	3.644e+06	923683	1.79102e+06	1.54147e+06
170	113.087	310.309	257771	335734	0	67020.4	141660	121028	113063	0	3.51802e+06	54465.3	6.73253e+06	0	0	41816.2	5.9877e+06	4.05612e+06	7.7433e+06	8.83257e+06	0	112075	1.39072e+06	1.44727e+06	1.62978e+06
171	435.711	527.155	1.0021e+06	69331.9	1.23455e+06	780519	1.70227e+06	2.71493e+06	682658	2.13098e+06	1.47956e+06	410407	78305.3	162861	125754	24999.5	292507	242396	12773.4	253070	221312	58854.7	2.46391e+06	1.0963e+06	1.04673e+06
172	341.092	127.05	1.52493e+08	9.59712e+06	1.97768e+07	2.22024e+07	2.09849e+07	1.27531e+07	3.40689e+07	3.15909e+07	1.92247e+07	2.89578e+07	3.08846e+06	0	0	1.34256e+06	1.57366e+06	0	0	0	0	0	3.41458e+07	3.13655e+07	2.98511e+07
173	238.531	138.091	877134	1.17778e+08	1.63457e+07	2.20823e+08	2.70019e+06	1.31951e+06	3.75889e+08	2.13083e+08	2.67551e+06	6.09631e+06	1.22406e+08	439783	3.2275e+06	1.06184e+07	3.04913e+06	2.08279e+06	3.05946e+06	9.42147e+06	4.97798e+07	4.87965e+06	6.64372e+07	6.18823e+07	6.80227e+07
174	64.285	128.106	4.57614e+06	3.38934e+06	3.40924e+06	2.68921e+07	3.24617e+06	3.82836e+07	2.84244e+07	2.32618e+06	2.70762e+06	7.847e+06	1.37465e+06	158356	0	492237	1.89689e+06	1.20778e+06	928863	653785	7.24199e+06	412068	7.1825e+06	7.54007e+06	7.77969e+06
175	16.0801	288.251	1.22516e+06	1.87767e+06	1.19797e+06	2.18456e+06	1.33318e+06	1.45262e+06	1.96208e+06	1.04685e+06	1.27874e+06	2.01422e+06	1.13792e+06	1.04593e+06	1.28709e+06	1.1723e+06	1.24716e+06	1.35594e+06	1.54965e+06	1.31695e+06	1.17453e+06	1.36877e+06	1.15212e+06	1.21538e+06	878400
176	324.687	204.122	6.12764e+08	2.4439e+08	4.02059e+08	2.48424e+08	2.25255e+08	1.08176e+09	6.06112e+08	3.12963e+08	4.91124e+07	5.93349e+07	1.56117e+08	6.80411e+07	1.49116e+08	5.82754e+06	9.17648e+07	2.51723e+08	1.30351e+08	3.706e+08	2.18422e+08	1.03315e+08	3.02198e+08	3.23814e+08	3.34313e+08
177	491.375	132.101	1.04157e+07	8.10679e+06	8.23807e+06	4.19653e+06	6.60515e+06	3.08115e+06	7.88915e+06	1.09433e+07	1.46847e+07	2.30905e+07	5.72991e+06	8.03014e+06	8.43904e+06	3.59723e+06	6.91822e+06	3.90161e+06	6.0447e+06	1.27664e+07	1.45511e+07	1.20233e+07	6.13272e+06	8.80607e+06	1.09868e+07
178	265.617	138.091	569496	1.85966e+06	5.05734e+06	6.99488e+06	7.2823e+06	4.07694e+06	7.11533e+06	2.09363e+06	4.74235e+06	610192	1.82819e+07	1.2689e+07	1.24757e+07	1.45902e+07	1.56117e+07	1.41177e+07	1.46432e+07	1.39052e+07	1.7486e+07	3.39721e+06	9.03368e+06	8.58907e+06	8.41573e+06
179	371.08	120.065	1.00565e+07	5.98035e+06	1.64462e+07	6.78197e+06	4.00699e+07	8.45459e+06	8.95246e+06	1.97293e+07	1.0158e+08	4.98612e+07	2.90816e+06	1.34752e+07	4.24862e+06	1.41398e+06	1.2161e+06	5.07042e+07	2.42484e+06	1.42083e+07	8.70679e+06	1.55834e+06	2.50089e+07	2.31646e+07	2.10158e+07
180	300.774	189.122	1.50141e+07	1.48133e+06	8.04993e+06	2.30176e+07	6.74665e+07	2.94027e+06	1.26744e+07	6.28526e+06	4.25019e+07	1.45746e+08	1.71911e+06	4.3605e+07	497915	173810	597989	3.93592e+07	506066	3.62849e+07	803573	165430	2.7184e+07	2.52555e+07	2.35945e+07
181	247.394	265.116	2.6866e+06	773210	1.09803e+07	777273	4.84892e+07	9.52319e+06	2.14888e+06	5.24694e+06	2.5694e+06	1.05826e+07	1.07388e+06	1.29568e+06	878120	885601	321155	1.57199e+06	867305	171584	7.64615e+06	6.27911e+06	6.7762e+06	7.51787e+06	7.02006e+06
182	356.364	443.093	1.9904e+06	1.29661e+06	1.57534e+06	1.271e+06	1.71935e+06	1.47479e+06	1.56553e+06	1.02018e+06	597673	878679	0	0	0	0	38475.1	0	0	0	0	0	759364	713475	684137
183	337.435	727.182	318188	0	1.43241e+06	53499.4	210110	568275	182005	370268	175505	1.30512e+06	0	0	0	0	0	0	0	0	0	0	352605	312463	342537
184	402.109	233.112	3.31334e+06	293440	2.53343e+06	1.8444e+06	6.15961e+06	381027	1.06869e+06	752613	1.07092e+07	3.09147e+07	14159.8	7.77076e+06	88543.8	399718	98994.2	1.13453e+07	212447	1.97913e+06	421020	78768.6	3.41314e+06	3.63427e+06	3.30649e+06
185	18.8556	118.086	3.68554e+06	4.26371e+06	4.92127e+06	1.88178e+06	3.50689e+06	1.55197e+06	2.95936e+06	5.33509e+06	2.28254e+06	3.47307e+06	2.22484e+06	1.66727e+06	1.87481e+06	2.11086e+06	4.33315e+06	1.62147e+06	1.46807e+06	2.23465e+06	1.51419e+06	1.58556e+06	1.79317e+06	1.88138e+06	3.74778e+06
186	319.561	549.157	1.10287e+06	718399	575944	225002	477123	519562	500600	157157	0	303136	47130.1	681198	19483.1	89220.4	0	0	37732.4	42444.5	77049.8	41120.8	263928	230843	283790
187	533.926	84.0808	3.08454e+06	598505	649981	697647	1.96633e+06	508291	603144	678669	1.05711e+07	3.55876e+07	631711	5.46972e+06	476372	465505	466124	1.43911e+07	447986	922180	664538	478979	3.52894e+06	3.921e+06	2.77941e+06
188	427.854	316.137	89106.2	77291.7	286843	107987	81844.5	293420	204986	260362	525562	182617	91470.1	113015	28437.1	726775	151341	771486	67274.1	198828	955828	87791	520758	432611	795551
189	311.419	595.197	1.19535e+06	902088	983480	127040	1.0352e+06	1.06054e+06	1.22718e+06	645279	174542	334907	0	0	0	0	0	0	0	0	0	0	534727	565126	554444
190	249.536	260.184	261862	3.32573e+06	5.96479e+06	1.73423e+06	3.94304e+06	1.00538e+08	1.7401e+06	977436	2.39852e+07	4.51657e+07	4.31719e+06	4.07715e+07	4.00042e+06	550829	572473	4.42773e+06	1.50049e+06	5.43976e+06	1.70291e+06	2.16265e+06	1.38687e+07	1.36788e+07	1.21057e+07
191	301.093	218.138	4.06864e+07	1.85098e+07	6.57135e+07	2.02704e+07	2.9859e+07	9.47346e+08	2.73876e+07	2.67182e+07	1.32634e+08	1.38414e+08	4.18708e+07	7.83496e+07	2.41288e+07	5.27108e+06	7.80242e+06	3.67919e+07	1.09126e+07	4.74071e+07	1.33545e+07	1.12419e+07	1.18129e+08	1.18865e+08	1.01126e+08
192	376.457	219.059	279305	64745	142468	124000	0	31094.1	81852.8	22965.3	229227	246248	945953	2.05507e+06	874961	548226	508975	927166	444956	664128	2.53215e+06	858430	443876	337644	379647
193	39.5322	85.0648	27997.5	0	196447	0	0	0	0	0	399074	0	2.07592e+06	1.79208e+06	1.86317e+06	5.3999e+06	2.88722e+06	3.67255e+06	2.02605e+06	1.78534e+06	3.4999e+06	2.08049e+06	980081	588725	815439
194	370.545	465.193	1.33999e+06	1.64167e+06	884667	312560	1.01671e+06	725421	713960	1.61867e+06	180053	0	0	92127.2	0	0	0	0	0	0	0	0	465474	346414	109739
195	112.466	133.064	1.51573e+07	1.19731e+07	4.70284e+07	9.77567e+06	6.00569e+06	1.43358e+07	1.10741e+07	9.24975e+06	7.23858e+06	1.0592e+07	3.22835e+06	1.71302e+06	3.45756e+06	2.38304e+06	2.8917e+06	7.22199e+06	2.32484e+06	5.51906e+06	2.87629e+06	3.21498e+06	5.85251e+06	5.72228e+06	6.47403e+06
196	90.0582	141.065	1.07574e+06	0	0	77044.5	334061	3.91677e+06	6.88408e+07	673516	449412	524154	1.72109e+06	974056	927984	1.64986e+06	1.6018e+06	1.74575e+06	980763	1.56539e+06	1.06618e+06	1.37107e+06	2.80284e+06	2.79945e+06	2.84599e+06
197	385.138	166.052	7.95046e+06	7.31509e+06	2.51506e+07	7.88908e+06	9.57289e+07	5.10741e+06	1.92277e+07	2.60894e+07	2.1347e+08	5.74898e+08	1.83837e+06	1.13271e+08	5.26714e+06	388736	1.67685e+06	2.71687e+07	5.27793e+06	1.07165e+07	6.21478e+06	2.21714e+06	6.65118e+07	6.24489e+07	6.37449e+07
198	345.663	641.255	0	0	0	0	0	0	0	0	265959	0	433254	535118	199865	0	158125	535226	134216	459373	567092	17352.2	111292	118348	125114
199	475.424	467.135	14619.1	0	9079.12	0	8238.59	0	7383.96	5359.89	0	0	15189.4	292065	54879.2	75743.8	40737.2	724741	0	43583.8	135033	0	107012	110546	81617.2
200	42.0876	126.091	2.61535e+06	943481	878455	2.14242e+06	896371	474795	883564	718296	205600	1.3604e+06	3.00923e+06	1.53162e+06	4.22893e+06	6.53726e+06	2.50259e+06	6.14101e+06	3.82704e+06	5.3526e+06	1.09778e+07	6.32911e+06	1.41203e+06	1.5474e+06	1.5724e+06
201	33.3901	311.293	1.74126e+07	1.92258e+07	1.91006e+07	1.75971e+07	1.52265e+07	1.83144e+07	1.80479e+07	1.78269e+07	1.73768e+07	1.18757e+07	2.94586e+07	8.23324e+07	7.17724e+07	8.05833e+07	4.05714e+07	3.04776e+07	4.5806e+07	3.52325e+07	7.07567e+07	8.68168e+07	3.66348e+07	3.61262e+07	3.50634e+07
202	93.3285	298.095	6.35359e+06	7.13757e+06	2.45293e+06	2.49811e+06	7.46607e+06	1.0809e+07	4.6765e+07	7.19603e+07	8.05791e+06	4.97124e+06	1.55142e+06	2.25247e+06	540531	0	195932	7.35858e+06	200420	2.0717e+06	1.78688e+06	4.87468e+06	8.97823e+06	9.33162e+06	9.65199e+06
203	265.674	242.174	0	0	0	0	0	0	0	0	0	0	911018	416420	623721	439253	1.1288e+06	869153	309456	1.1123e+06	1.45939e+06	503691	111494	135571	196824
204	409.353	176.102	1.34465e+07	4.86747e+06	3.17017e+07	2.15296e+07	3.12049e+07	7.83645e+06	8.91615e+06	1.62428e+07	4.37053e+07	1.18881e+08	3.63515e+06	1.15639e+07	2.43996e+06	5.90414e+06	944466	5.29031e+07	1.48297e+06	2.50952e+06	1.60634e+07	5.06237e+06	2.61612e+07	2.81764e+07	2.81988e+07
205	395.609	146.117	9.17734e+06	4.68464e+07	3.35424e+07	9.11142e+08	4.86798e+07	3.21732e+08	3.5581e+08	4.85488e+07	8.48173e+07	7.91125e+07	6.30938e+08	2.71876e+07	1.47551e+07	6.97605e+07	1.45996e+07	6.85969e+07	1.82268e+07	5.43238e+07	3.77319e+07	1.87067e+07	1.71997e+08	1.54792e+08	1.58961e+08
206	340.553	81.0449	9.94597e+06	505464	1.18139e+06	1.24848e+06	1.23048e+06	762627	2.06789e+06	1.90413e+06	1.07424e+06	1.61464e+06	191459	17495.6	34753.1	124669	125904	124380	58913.8	87094.5	88033.3	112219	1.94881e+06	1.93246e+06	1.76631e+06
207	59.955	133.085	4.2932e+07	2.55863e+07	1.28338e+07	1.75802e+07	2.74373e+07	6.14711e+07	2.70236e+07	6.69031e+07	1.51724e+07	1.01458e+07	3.50502e+07	7.24597e+07	5.00767e+07	8.98436e+07	3.86212e+07	2.15701e+07	4.89263e+07	2.385e+07	8.00923e+07	4.88411e+07	4.52224e+07	4.20166e+07	4.08992e+07
208	355.692	256.08	5.51537e+06	1.3618e+06	4.30873e+06	3.33748e+06	810815	5.43361e+06	3.57103e+06	1.91076e+06	354407	1.62109e+06	331398	133864	162606	0	455643	1.41531e+06	99408.4	497449	485914	2.09503e+06	1.99739e+06	1.85935e+06	1.8293e+06
209	354.791	104.07	6.85517e+07	7.3946e+06	5.11447e+06	6.6121e+06	1.02464e+07	3.48e+06	1.67743e+07	3.77547e+06	1.85448e+07	1.12627e+07	7.55932e+06	1.15173e+07	3.72714e+06	3.73803e+06	6.02239e+06	5.46576e+06	3.96444e+06	4.98272e+06	1.17177e+07	4.64721e+06	1.16092e+07	1.14251e+07	1.21955e+07
210	451.97	130.049	3.15184e+06	1.97895e+06	3.29436e+06	2.57636e+06	3.3024e+06	1.10362e+06	1.43994e+06	3.12977e+06	5.21058e+06	4.72251e+06	1.72261e+06	1.47851e+06	0	0	165170	4.23739e+06	274887	239482	0	619460	2.66751e+06	3.45503e+06	2.25113e+06
211	282.706	205.096	2.05179e+07	9.49359e+06	2.55859e+07	3.42472e+07	1.40278e+08	534518	1.54104e+07	1.81365e+07	2.60166e+08	4.71985e+08	5.83745e+06	7.62371e+07	9.39019e+06	2.60644e+06	3.05078e+06	1.16612e+08	1.12366e+07	6.75264e+07	1.98534e+07	7.58774e+06	6.27306e+07	6.44128e+07	6.18828e+07
212	255.592	246.107	2.85179e+06	713128	370736	441717	969526	734350	510992	1.66223e+06	1.61607e+06	350312	135400	470946	94200.2	26342.5	51358.6	199984	251582	520661	247429	658022	560513	692785	324508
213	50.3289	138.091	3.65322e+06	2.42343e+06	5.10093e+06	2.32784e+06	2.72576e+06	4.23921e+06	1.95051e+06	3.04576e+06	3.52862e+06	4.52753e+06	6.01676e+06	6.57002e+06	6.70671e+06	1.03556e+07	9.23737e+06	9.23919e+06	6.13511e+06	6.48262e+06	6.3546e+06	6.93265e+06	904437	2.54116e+06	4.08349e+06
214	427.526	116.07	4.60458e+06	6.33647e+06	6.3901e+06	9.75787e+06	6.14004e+06	1.09671e+07	4.76889e+06	7.05443e+06	1.14184e+07	2.77489e+07	3.41261e+06	5.06378e+06	3.088e+06	4.26466e+06	2.96619e+06	9.93374e+06	2.09418e+06	4.62951e+06	4.27759e+06	1.89006e+06	6.86106e+06	6.72e+06	7.48821e+06
215	96.5716	335.166	476303	580031	115634	72509.2	248323	920703	635423	0	0	0	1.23913e+06	5.34722e+06	2.25766e+06	3.27823e+06	1.97293e+06	1.11969e+06	1.83749e+06	1.31822e+06	4.13932e+06	3.47679e+06	1.19717e+06	1.19451e+06	1.07059e+06
216	299.029	224.127	258976	71579.5	616248	1.34432e+06	262020	137549	323230	1.37587e+06	337623	60410.7	2.45005e+06	891765	1.12137e+06	532924	1.88425e+06	2.29633e+06	840686	1.83242e+06	1.43989e+06	996287	473507	416810	635692
217	52.8875	182.117	1.81595e+07	1.33197e+06	3.54945e+06	2.67414e+06	2.26731e+06	3.3499e+06	2.25369e+06	1.90895e+06	2.63859e+06	2.05559e+06	9.87814e+06	8.00929e+06	6.32358e+06	6.71722e+06	8.2821e+06	9.12439e+06	8.85038e+06	8.19102e+06	1.05086e+07	4.52396e+06	2.56056e+06	4.47404e+06	4.11299e+06
218	57.3163	223.095	1.74282e+06	676503	941588	541321	462502	644602	812242	122651	636845	515368	5.54906e+06	2.39714e+06	6.16052e+06	2.61495e+07	9.16338e+06	6.14966e+06	1.28363e+07	3.74767e+06	8.64298e+06	1.25961e+07	6.98975e+06	6.12427e+06	6.60503e+06
219	102.51	381.349	5.8822e+06	7.54378e+06	7.27509e+06	6.77643e+06	5.84135e+06	5.27347e+06	6.13158e+06	4.89401e+06	4.0164e+06	6.76591e+06	993241	0	0	0	427945	154091	585543	1.26553e+06	73251.7	0	3.14333e+06	2.72071e+06	2.60711e+06
220	180.98	105.07	3.95542e+06	4.62433e+08	1.36165e+07	2.23586e+07	6.14396e+06	4.06977e+06	2.36142e+08	1.09434e+08	8.56984e+06	1.27428e+07	3.06243e+07	2.77804e+06	4.57439e+06	3.1707e+06	3.52891e+06	5.21027e+06	4.91347e+06	2.88053e+06	7.53427e+06	3.3041e+06	5.79392e+07	5.13739e+07	4.77656e+07
221	527.39	175.118	9.71185e+07	1.18083e+06	3.46504e+06	3.55431e+06	5.78367e+07	9.70322e+06	1.12558e+07	9.06379e+06	2.42404e+08	7.01684e+08	6.66092e+06	4.05648e+08	3.53694e+07	4.89918e+06	1.91094e+06	2.02245e+08	8.04513e+06	5.66468e+07	5.64633e+07	1.39387e+07	1.59423e+08	1.68251e+08	1.23165e+08
222	81.1519	437.233	1.75532e+07	9.95737e+06	7.65981e+06	5.20141e+06	8.47383e+06	1.50292e+07	1.1305e+07	2.59655e+07	7.25621e+06	6.67335e+06	3.69291e+06	1.44777e+07	7.30978e+06	9.54417e+06	3.20102e+06	1.07203e+06	5.82722e+06	1.04941e+06	1.03568e+07	5.70688e+06	9.46667e+06	1.3363e+07	1.06352e+07
223	431.33	241.128	2.20289e+06	197383	1.61216e+06	332381	633564	22449.1	84218.7	40546.8	1.10075e+06	987001	0	1.15147e+06	144463	0	0	673694	0	335094	37857.9	0	608847	583225	519109
224	126.453	304.298	1.09938e+09	9.4319e+08	1.52161e+09	7.86665e+08	6.86562e+08	9.55395e+08	1.21544e+09	9.95378e+08	5.67111e+07	1.76111e+08	2.14736e+06	1.28026e+07	1.91208e+06	9.34965e+06	3.13529e+06	9.00286e+06	3.25197e+06	9.24108e+06	3.21842e+06	1.77702e+06	5.428e+08	5.53283e+08	5.88292e+08
225	151.533	144.08	4.51117e+06	2.91506e+06	3.90682e+07	7.93695e+06	5.2286e+06	9.65418e+06	7.23133e+07	7.51732e+06	9.58113e+06	6.7316e+06	1.19302e+06	1.4928e+06	1.79408e+06	978403	3.25333e+06	2.24817e+06	1.44716e+06	1.38795e+06	9.21033e+06	1.67615e+06	5.52277e+06	5.94995e+06	5.62308e+06
226	133.705	166.049	6.41621e+06	6.86739e+06	1.04881e+07	4.34598e+06	2.11356e+06	1.32199e+07	5.25118e+06	1.13255e+07	1.24578e+07	1.17954e+07	1.52086e+06	2.33778e+06	2.51037e+06	1.83932e+06	4.89836e+06	4.55925e+06	3.19887e+06	1.88122e+06	7.82818e+06	6.77111e+06	6.0303e+06	6.03313e+06	5.51887e+06
227	262.36	377.179	1.80158e+06	0	465939	0	2.10043e+06	93797.1	0	227767	4.63463e+06	1.1612e+06	355015	989542	70933.7	0	53723.4	494331	203637	618465	212015	26592.1	918026	903089	718020
228	215.625	236.127	65107.8	86974.9	575207	705544	102437	0	63862.7	46573.7	669915	935934	2.10877e+06	1.03969e+06	990606	298404	1.68202e+06	3.03686e+06	1.15364e+06	840894	1.94078e+06	677113	699542	686280	614638
229	305.904	150.058	1.53147e+07	7.64478e+06	1.30179e+07	3.45916e+07	6.59059e+07	1.25202e+06	2.86506e+07	2.81575e+07	1.90956e+08	1.741e+07	2.52137e+07	3.30219e+06	5.33371e+06	566384	6.59914e+06	3.03517e+08	4.80602e+06	1.73903e+08	3.42774e+07	7.71258e+06	4.50134e+07	7.35462e+07	4.15052e+07
230	271.399	167.069	1.37184e+07	1.84972e+06	1.86039e+07	8.1795e+06	1.43025e+07	9.45798e+06	8.72012e+06	1.35176e+07	7.76437e+06	1.34688e+07	751764	0	0	449820	0	1.38633e+06	0	512844	691905	0	7.60004e+06	7.54235e+06	5.84764e+06
231	98.4575	282.118	1.09697e+08	290023	3.16642e+06	70187.3	2.84559e+06	2.61807e+06	2.00738e+06	530028	2.74839e+07	2.23935e+06	1.20037e+06	6.98591e+07	6.41213e+06	1.16581e+06	3.4102e+06	2.77216e+06	1.21881e+06	1.24332e+06	4.51386e+06	1.37535e+06	1.45138e+07	1.36097e+07	1.23982e+07
232	173.234	167.069	1.73875e+07	1.16817e+07	1.78924e+07	7.22107e+06	6.51992e+06	3.39917e+07	1.32649e+07	1.11506e+07	3.44323e+06	8.62952e+06	1.84695e+07	7.68944e+06	1.43698e+07	3.40005e+07	1.31241e+07	1.39103e+07	1.8335e+07	9.57678e+06	1.80444e+07	1.31255e+07	1.16497e+07	1.02214e+07	1.0222e+07
233	67.7858	132.101	3.55659e+07	8.41198e+06	5.46566e+06	2.68752e+06	6.41003e+06	4.32475e+06	4.84802e+07	1.33576e+07	6.91806e+06	4.40052e+06	1.72243e+07	9.11792e+06	5.83352e+06	1.29258e+07	1.66068e+07	7.22171e+06	2.00673e+07	2.08927e+07	1.11623e+07	6.48919e+06	7.95455e+06	8.04929e+06	1.13483e+07
234	211.026	151.038	1.35222e+07	5.77572e+06	3.34637e+07	4.15321e+06	1.15659e+07	1.36934e+07	2.05472e+07	7.78738e+06	5.11443e+06	2.42946e+07	212521	541422	856376	1.67054e+06	1.81949e+06	585047	801667	604329	1.51248e+06	438359	1.07541e+07	9.82229e+06	9.4902e+06
235	322.073	182.08	1.3577e+08	1.16309e+07	1.75348e+08	9.97576e+07	3.23772e+08	5.75095e+07	7.77699e+07	7.01825e+07	1.44815e+08	3.45746e+08	1.57324e+07	7.31709e+07	2.42208e+07	1.28008e+07	1.07109e+07	3.80419e+08	2.15235e+07	1.21502e+08	9.0224e+07	1.03148e+07	2.35765e+08	2.40547e+08	2.45937e+08
236	150.372	180.087	2.79296e+08	1.32822e+07	1.27475e+08	8.53662e+07	9.82159e+07	1.11572e+08	1.2243e+08	2.02447e+07	6.43416e+07	9.16181e+07	5.32996e+06	3.20393e+07	1.22081e+07	2.55657e+06	8.89082e+06	3.91198e+07	7.92543e+06	9.74064e+06	8.84846e+06	1.69312e+07	5.79293e+07	5.72657e+07	5.55864e+07
237	244.828	285.179	6.5487e+06	1.00811e+07	1.09304e+07	1.50983e+07	3.35617e+06	3.37365e+06	8.23721e+06	2.71018e+06	1.17873e+07	2.81222e+06	2.17335e+06	652264	644344	737345	3.09625e+06	2.30773e+06	1.64288e+06	3.39464e+06	2.63491e+06	837828	5.15971e+06	4.75691e+06	5.21389e+06
238	221.503	135.116	68867.4	66223.3	349247	148247	28145.1	40506.5	148631	203371	245942	7.91429e+07	775318	774465	450839	672448	549849	809157	438818	789008	796580	450040	3.97366e+06	3.91664e+06	4.35888e+06
239	413.727	561.177	1.55881e+06	144895	302027	759982	838335	1.47129e+06	2.23758e+06	175536	71338.9	632613	0	0	0	0	8473.17	0	0	12093.9	25176.5	0	528502	577289	468681
240	428.018	162.075	3.71349e+06	4.05353e+06	2.60193e+07	4.63803e+06	1.26635e+07	1.60091e+07	4.89427e+06	6.75887e+06	2.88367e+07	4.18872e+07	1.7817e+06	9.42458e+06	3.30248e+06	2.01321e+06	2.46893e+06	2.33107e+07	1.42746e+06	5.69302e+06	3.84426e+06	1.92075e+06	9.51964e+06	1.07243e+07	1.09498e+07
241	75.5096	409.181	7.95953e+06	6.52462e+06	3.77758e+06	3.9392e+06	6.21205e+06	5.71893e+06	4.61602e+06	1.19507e+07	2.28788e+06	2.88458e+06	1.91537e+06	5.03277e+06	3.57343e+06	7.17695e+06	2.90978e+06	1.13708e+06	2.19719e+06	1.73266e+06	6.13579e+06	1.98541e+06	6.06955e+06	4.81056e+06	5.65097e+06
242	210.469	144.08	4.58138e+06	1.44823e+06	5.17777e+06	3.12804e+06	1.61512e+06	663656	5.79303e+08	1.66574e+06	1.54589e+06	1.18935e+06	2.70804e+08	1.41674e+06	535087	532128	942939	1.01474e+06	1.10443e+06	552704	1.37841e+06	1.64699e+06	3.76703e+07	3.4697e+07	3.8687e+07
243	301.464	239.101	325485	28451.2	453243	402545	1.16024e+06	119057	568019	465706	7.5073e+06	8.29779e+06	126919	1.90908e+07	208871	132381	68920.7	3.4443e+06	307573	2.62281e+06	335193	163744	2.63313e+06	2.50289e+06	2.21344e+06
244	337.507	503.113	70953.7	37855.8	223392	106956	104098	113614	171204	74704.7	51258.5	27966.2	0	0	0	0	0	0	0	0	0	0	63963.1	45550	65515.2
245	38.8798	227.163	2.03427e+06	9.76014e+06	4.00035e+06	2.32285e+06	4.21862e+06	2.47243e+06	3.02116e+06	4.51934e+06	0	586022	1.95168e+07	1.34082e+07	1.93956e+07	3.48256e+07	3.98786e+07	3.96668e+07	1.57457e+07	2.05575e+07	1.59938e+07	2.50053e+07	8.74756e+06	9.30681e+06	1.06083e+07
246	195.069	123.08	0	551941	0	62822.8	285846	179800	92418.1	150093	0	1.83405e+06	2.05806e+07	2.04511e+07	1.33328e+07	1.41041e+07	2.37191e+07	2.72998e+07	1.3598e+07	2.40921e+07	2.30368e+07	1.10675e+07	8.44666e+06	8.33655e+06	8.28439e+06
247	344.496	118.086	7.41616e+07	4.81274e+07	4.46664e+07	4.13642e+07	8.00356e+07	2.5392e+07	6.61793e+07	4.06522e+07	1.42936e+08	1.66868e+08	2.25202e+07	4.32861e+07	1.5257e+07	1.06201e+07	1.5906e+07	5.02491e+07	1.87446e+07	4.16327e+07	4.96266e+06	5.22874e+06	4.53604e+07	5.71953e+07	5.95038e+07
248	164.813	104.07	2.49892e+06	1.4081e+06	3.39607e+06	3.192e+06	774484	1.21186e+07	3.57796e+06	3.43087e+06	1.7282e+06	3.13254e+06	994516	902128	1.13177e+06	819048	619479	853425	451576	302563	1.34607e+06	1.09185e+06	1.95025e+06	2.07783e+06	2.39113e+06
249	546.691	246.18	1.94154e+06	188627	653318	1.20579e+06	2.53791e+06	590483	1.04544e+06	511016	5.35796e+06	4.40378e+06	1.64326e+06	3.77143e+06	823673	185580	82749.7	3.3788e+06	277992	1.36438e+06	797965	1.24475e+06	2.12203e+06	1.82571e+06	1.80941e+06
250	188.876	331.116	1.98274e+06	1.10141e+06	2.69785e+06	565565	705378	1.05044e+06	1.06623e+06	2.00253e+06	854908	1.11094e+06	178386	0	177314	77691.1	96689.2	0	284118	0	94058.4	363824	961307	683418	199995
251	273.223	196.096	3.8342e+06	380338	1.9875e+06	1.36444e+06	94900.3	1.38925e+06	1.3221e+06	714956	2.18648e+06	365146	1.8799e+06	163989	868682	3.46855e+06	4.23585e+06	4.07548e+06	3.1128e+06	1.2514e+06	4.64806e+06	1.23755e+06	2.22351e+06	2.02516e+06	1.68376e+06
252	318.488	237.086	4.56959e+06	197001	539385	219612	261861	1.59543e+06	710046	350371	369081	1.3123e+06	0	27923.5	19393.1	122681	0	154265	0	73542.9	94435	117924	504803	697119	541016
253	339.12	140.118	23115.3	0	0	0	19886.9	0	0	0	0	0	3.71212e+07	7.12281e+06	2.5929e+06	3.05603e+08	1.72566e+06	1.89892e+07	8.68206e+06	2.88727e+06	1.57956e+07	2.9356e+07	1.62887e+07	1.51095e+07	1.60081e+07
254	217.829	462.34	793902	72545	218898	1.01065e+06	1.47819e+06	1.28277e+06	1.63019e+06	401960	573564	2.34366e+06	245475	405617	116239	19188.7	287572	596882	192519	675857	301069	191248	855492	793782	642559
255	18.2468	121.05	224563	300290	282370	466589	367576	469964	485353	299312	461945	5.47828e+07	371000	436026	347479	425699	405714	393656	428286	338925	445281	427740	317463	381725	387015
256	299.889	312.128	5.94022e+06	1.26448e+07	3.68753e+07	1.19531e+07	9.6807e+06	5.41941e+06	9.19282e+06	1.4395e+07	1.37832e+07	1.17432e+07	9.11365e+06	4.56646e+06	7.14609e+06	1.09546e+07	5.29863e+06	7.63444e+06	9.51922e+06	8.0732e+06	6.82892e+06	7.45644e+06	1.26552e+07	1.14014e+07	1.16897e+07
257	267.426	174.111	8.58768e+06	8.70614e+06	8.38291e+06	8.53666e+06	2.77588e+06	3.32786e+06	9.26092e+06	4.17114e+06	4.90079e+06	1.11265e+07	913797	621252	1.04836e+06	680935	1.04508e+06	2.24426e+06	1.22228e+06	888497	3.65681e+06	971020	4.32186e+06	4.41169e+06	4.73991e+06
258	233.798	253.105	116095	14688.2	419447	65029.1	118359	160122	520511	104249	224748	160608	746734	506626	490317	249826	275362	414347	213450	266124	320758	236527	288979	323145	325636
259	117.707	275.129	365990	181207	821210	520559	7.54164e+07	255315	128701	250258	568870	2.92607e+07	0	3.65765e+06	51229	0	0	249503	276470	0	1.55375e+06	48582.5	5.82084e+06	6.29551e+06	6.1247e+06
260	304.623	437.197	164012	97244.1	126160	65600.2	137742	125060	127515	263438	0	0	1.1169e+06	2.58048e+06	1.17707e+06	1.00687e+06	490859	866499	866620	734464	1.69773e+06	1.26224e+06	743040	679512	496087
261	192.843	375.142	1.33238e+06	2.16285e+06	198382	1.18667e+06	1.87601e+06	1.5514e+06	1.39484e+06	382839	510759	97093.2	31451.2	0	0	52914.3	95611.8	39657	0	0	0	0	537051	464529	324682
262	260.986	263.137	3.09926e+07	3.85353e+06	7.52391e+06	4.00134e+07	6.89524e+07	5.22378e+06	1.50512e+07	1.23207e+07	1.18454e+08	2.88899e+08	6.75112e+06	4.62171e+07	2.11967e+06	692748	5.54154e+06	8.36138e+07	7.42794e+06	5.27406e+07	4.74918e+06	1.80494e+06	4.57656e+07	5.50988e+07	3.21797e+07
263	242.751	198.111	597637	77245.9	745237	150373	514812	580530	660039	500677	859499	484295	1.32151e+06	2.38304e+06	1.60652e+06	252744	1.01914e+06	4.87096e+06	1.54882e+06	1.90079e+06	1.95408e+06	562353	1.12746e+06	1.04696e+06	1.06109e+06
264	390.17	104.07	9.22308e+07	7.1102e+07	1.81336e+08	6.66211e+07	4.41594e+07	3.03079e+08	1.74288e+08	2.43975e+08	9.52728e+07	7.40475e+07	2.2818e+07	8.60906e+06	2.69891e+07	1.34181e+07	1.72935e+08	3.18811e+07	3.9046e+07	2.28695e+07	5.93981e+07	5.05393e+07	1.12109e+08	1.05948e+08	1.0643e+08
265	523.73	203.149	1.53074e+07	1.99333e+06	3.89178e+06	5.52981e+06	8.90128e+06	2.83691e+06	4.3972e+06	1.97145e+06	8.39156e+06	2.98386e+07	1.20215e+06	1.18604e+07	1.79594e+06	1.31869e+06	352377	1.65233e+07	434986	3.52286e+06	3.99167e+06	3.30819e+06	9.70726e+06	9.34383e+06	8.02881e+06
266	397.555	170.091	1.91701e+07	1.66686e+07	2.3047e+07	8.75307e+06	7.47711e+07	190460	1.01417e+06	1.04116e+06	1.57916e+07	8.87017e+07	1.1367e+06	6.46579e+06	2.23637e+06	4.83712e+06	374555	7.36096e+06	571469	1.13118e+07	2.4774e+06	634066	1.23638e+07	1.24834e+07	1.4896e+07
267	56.4265	141.09	2.22395e+06	450073	826523	807966	848775	549557	1.0697e+06	216473	1.05637e+06	303234	5.7817e+06	4.37494e+06	4.60862e+06	3.65199e+06	6.8475e+06	8.54079e+06	3.2464e+06	8.28824e+06	4.20126e+06	6.49294e+06	1.8456e+06	2.63016e+06	2.47025e+06
268	203.681	386.157	2.44386e+06	3.06291e+06	1.97936e+06	1.3131e+06	358759	2.49065e+06	2.80704e+06	1.28309e+06	568906	980427	182754	0	0	0	0	24436.2	0	48320.3	0	0	976901	897635	668545
269	158.173	215.127	152602	1.46816e+06	1.60099e+06	0	1.5348e+06	360322	218648	2.12848e+06	594096	353460	1.94146e+07	5.54419e+07	3.21759e+07	3.70532e+07	1.85447e+07	1.32358e+07	2.7851e+07	1.54646e+07	5.58245e+07	2.50497e+07	1.5129e+07	1.55175e+07	1.54825e+07
270	81.9701	300.287	3.09455e+09	1.23096e+08	8.13622e+08	9.43498e+07	1.60824e+09	5.04158e+08	1.80586e+09	9.49956e+08	2.77966e+09	1.97008e+09	2.66694e+08	1.93644e+09	2.03496e+08	3.63583e+07	6.36649e+07	1.12414e+09	3.74787e+08	8.18325e+08	3.56435e+08	1.95495e+08	1.14666e+09	1.17852e+09	1.18568e+09
271	337.435	533.124	197853	248346	864539	380116	266916	389365	564668	377823	276536	747109	0	0	0	0	0	0	0	0	0	0	328565	261974	205285
272	199.358	153.054	5.46909e+06	3.41057e+06	3.23598e+06	2.5619e+06	2.63633e+06	5.18733e+06	3.29902e+06	3.57421e+06	2.74255e+06	4.75985e+06	9.31394e+06	1.40441e+07	1.02996e+07	1.42644e+07	2.2783e+07	1.73561e+07	1.52002e+07	1.425e+07	1.27659e+07	1.34375e+07	5.61255e+06	5.98613e+06	5.05559e+06
273	274.757	212.088	1.67598e+08	211995	417363	235340	58430.8	3.16215e+07	3.10942e+07	437036	119879	204961	412220	598332	264631	1.16836e+06	3.111e+06	360807	423706	473916	520870	68803.6	1.6733e+07	2.17486e+07	1.032e+07
274	425	272.17	491440	11036.1	249866	715203	1.58793e+06	0	267934	314403	8.11621e+06	1.45628e+07	107000	2.1528e+07	376876	451989	27333.8	4.79188e+06	370434	2.89927e+06	303853	269995	3.98725e+06	3.97436e+06	4.04454e+06
275	440.373	231.096	183630	105613	578707	501115	853113	31412.5	387986	266894	6.17041e+06	8.32054e+06	87966.6	1.79509e+06	45910.8	0	6637.97	4.47016e+06	45749	429744	90275.9	23085.2	1.12564e+06	1.25075e+06	917102
276	129.594	144.065	2.64927e+07	2.07416e+07	1.32761e+08	6.17116e+07	3.38117e+07	1.0454e+08	2.29784e+07	8.1929e+07	6.57995e+07	6.31847e+07	6.00129e+06	1.40526e+07	1.18813e+07	6.65308e+06	2.53832e+07	2.2288e+07	9.98674e+06	6.72466e+06	2.12393e+08	1.13045e+07	3.47345e+07	2.89658e+07	8.27422e+07
277	440.397	229.117	516938	2.45111e+06	7.69034e+06	1.26551e+06	2.50893e+07	2.51868e+06	1.06932e+06	2.69517e+06	7.47883e+06	7.82637e+06	386371	2.39089e+06	1.465e+06	827062	617309	2.34964e+06	1.41733e+06	8.12651e+06	3.91475e+06	4.99045e+06	4.89036e+06	4.98716e+06	5.14679e+06
278	344.737	128.07	3.21195e+06	1.13934e+06	1.01098e+06	468658	1.4671e+06	807477	1.5922e+06	1.55302e+06	1.56002e+06	3.86721e+06	903671	946328	846189	766381	1.17685e+06	4.04624e+06	1.08951e+06	1.29127e+06	702481	812365	1.20964e+06	1.16991e+06	1.48535e+06
279	153.714	134.08	7.03996e+06	252155	1.86167e+06	429424	1.21845e+06	1.34257e+06	3.16626e+06	587145	758873	1.16735e+06	1.34952e+06	3.65043e+06	1.2048e+06	946371	337971	1.24124e+07	1.80606e+06	651826	829007	619431	2.51216e+06	2.26705e+06	2.68736e+06
280	248.677	509.233	1.06229e+06	0	0	0	0	0	0	0	0	0	389219	247738	394334	363767	64895.4	166849	198134	349977	321186	0	117887	203385	0
281	97.2662	170.08	1.16627e+09	1.77366e+07	1.06484e+08	1.88546e+07	1.32691e+07	3.96187e+07	1.25234e+08	7.02994e+07	1.40856e+07	5.91528e+07	3.17955e+06	2.63153e+06	3.67616e+06	7.63282e+06	6.30134e+06	4.14818e+06	6.90956e+06	2.55694e+06	8.40194e+06	7.64855e+06	9.76426e+07	9.21066e+07	8.85481e+07
282	334.659	258.12	138831	0	0	204743	58467.5	79676.3	147261	70322.1	0	22299.1	1.00774e+06	341741	1.09725e+06	7.81976e+06	403425	735734	296308	817221	3.81283e+06	5.98084e+06	1.42262e+06	1.58268e+06	1.39636e+06
283	516.233	189.133	2.1034e+06	25033.9	905805	662740	257210	180317	637477	83249.1	9.66385e+06	1.22034e+07	241198	3.86337e+06	529225	879591	22543	9.0878e+06	176435	11073.3	1.83303e+06	326756	2.40553e+06	2.96904e+06	2.0184e+06
284	383.116	365.104	2.8906e+07	3.76344e+07	1.09001e+08	8.12705e+07	1.46841e+08	1.09579e+08	9.48246e+07	1.38433e+08	1.24828e+08	9.45253e+07	776287	1.46018e+06	2.68079e+06	1.61193e+07	3.51043e+06	1.99511e+06	1.08258e+06	1.38285e+06	2.9995e+06	1.2166e+07	9.15165e+07	8.54933e+07	8.35498e+07
285	217.775	329.148	7.89573e+06	320614	5.25043e+06	7.08366e+06	1.65519e+07	468763	2.19163e+06	1.61355e+06	1.55383e+07	1.02271e+07	389759	6.64269e+06	626944	0	94001.6	5.54115e+06	950708	5.04146e+06	3.08941e+06	139272	5.17261e+06	5.30076e+06	4.9216e+06
286	307.738	233.062	59419.3	353481	456567	469305	1.59445e+06	385959	536085	3.65753e+06	721192	799589	361349	675182	913670	211082	1.31017e+06	790361	725782	1.26546e+06	492213	347149	948765	990934	814485
287	139.681	326.303	3.96186e+06	1.40558e+06	750468	0	1.8376e+06	326848	701070	1.42238e+06	1.58086e+06	205114	437385	1.20499e+06	179652	0	59497.6	286709	204621	905111	331458	359397	613958	838482	786407
288	408.466	325.111	427299	1.16606e+06	3.63048e+06	3.39499e+06	1.71135e+06	1.0817e+06	586618	1.25638e+06	234228	1.24935e+06	2.12629e+06	784342	892128	437096	778947	1.31229e+06	336852	614739	1.33881e+06	2.09782e+06	1.42922e+06	1.22643e+06	2.23893e+06
289	122.878	298.308	8.54204e+06	1.96358e+06	2.2816e+06	911597	3.18355e+06	730881	3.57041e+06	2.23679e+06	1.18652e+07	3.21398e+06	1.84922e+06	5.94092e+06	522064	0	169602	1.53565e+06	751398	3.30682e+06	558987	1.12675e+06	2.56467e+06	3.13162e+06	2.79506e+06
290	256.498	447.146	2.09618e+06	2.30624e+06	3.18952e+06	1.96883e+06	2.66866e+06	3.68508e+06	4.0825e+06	3.97779e+06	2.18512e+06	2.13227e+06	0	0	0	0	0	0	0	0	0	0	1.87906e+06	1.97511e+06	2.12936e+06
291	148.036	280.261	1.09599e+08	2.60879e+07	4.78597e+07	4.27914e+06	6.80576e+07	1.33873e+07	1.13913e+08	6.37294e+07	1.16992e+08	1.63835e+07	2.69251e+07	7.14072e+07	7.13192e+06	0	4.14641e+06	2.37444e+07	1.55721e+07	5.52357e+07	1.34016e+07	1.13672e+07	4.44849e+07	4.38964e+07	4.49218e+07
292	181.614	122.096	2.62223e+06	3.33835e+08	6.13248e+06	1.44255e+07	3.22422e+06	2.79114e+06	1.75506e+08	7.44402e+07	4.8771e+06	7.28693e+06	2.02908e+07	1.20553e+06	2.52835e+06	805644	548188	2.08019e+06	2.32326e+06	1.11039e+06	3.8974e+06	1.46136e+06	3.35568e+07	3.17153e+07	3.24766e+07
293	220.19	107.049	5.36079e+06	5.17024e+06	9.18515e+06	5.84404e+06	4.48528e+06	4.14833e+06	4.70818e+06	2.31411e+06	2.91187e+06	3.11858e+06	1.53422e+06	2.30142e+06	1.69679e+06	3.38954e+06	3.00156e+06	3.66245e+06	2.57149e+06	4.81931e+06	4.44905e+06	1.58648e+06	6.61325e+06	3.8947e+06	3.99626e+06
294	376.867	283.125	510631	19468.3	279220	390194	1.54846e+06	0	199461	43719	1.3791e+06	4.08934e+06	13662.4	1.45184e+06	10663.1	15021.8	9403.58	1.82991e+06	25152.2	756750	312464	15935.6	607935	581398	662918
295	48.447	170.08	1.11761e+07	6.32546e+06	9.1329e+06	9.48998e+06	7.40464e+06	1.26514e+07	1.10926e+07	1.00321e+07	3.52459e+06	6.87663e+06	3.31209e+06	4.51656e+06	758745	3.63548e+06	2.1189e+06	2.16172e+06	2.43006e+06	3.34078e+06	2.863e+06	3.40997e+06	4.27445e+06	5.44147e+06	5.37392e+06
296	533.938	130.086	7.69359e+06	585643	923957	1.39205e+06	3.67946e+06	621407	766481	843098	2.56764e+07	8.381e+07	688372	1.3343e+07	1.00367e+06	626832	470539	4.30603e+07	353397	1.75507e+06	1.25717e+06	577477	8.22186e+06	8.4477e+06	6.08842e+06
297	238.587	121.064	3.99962e+06	3.18351e+08	4.53279e+07	5.98252e+08	5.68733e+06	3.60888e+06	1.01797e+09	5.58898e+08	9.31723e+06	4.45494e+06	3.27129e+08	1.11453e+06	1.13928e+07	3.08851e+07	4.871e+06	6.57057e+06	8.87943e+06	1.00378e+06	1.38381e+08	2.19223e+07	1.75238e+08	1.72366e+08	1.81803e+08
298	76.7147	112.039	0	1.34111e+06	2.42732e+06	3.18154e+06	2.49446e+06	0	2.76858e+06	613788	2.70208e+06	2.851e+06	0	752309	750549	0	65552.5	0	0	346634	550060	0	293442	1.2577e+06	1.1595e+06
299	550.371	188.175	2.28258e+06	2.27021e+08	483611	4.85602e+06	5.63475e+06	0	9.57125e+07	2.56883e+06	1.74719e+07	209775	5.91735e+07	1.21714e+07	4.24844e+06	5.4718e+06	9.146e+07	1.40322e+06	468290	1.04673e+08	1.05795e+06	970147	2.35164e+07	2.1763e+07	1.08571e+06
300	134.289	309.277	1.13277e+06	2.01241e+06	370485	595747	692570	1.49563e+06	1.74958e+06	1.34507e+06	44245.8	0	1.93007e+06	9.46979e+06	8.86167e+06	7.06088e+06	6.77773e+06	3.87772e+06	4.30913e+06	4.19476e+06	8.6663e+06	1.07602e+07	3.9808e+06	3.75778e+06	3.52785e+06
301	353.694	168.064	2.50622e+06	4.87674e+06	5.59977e+06	2.51393e+06	2.46063e+06	3.97295e+06	3.24514e+06	5.1725e+06	3.45897e+06	3.74603e+06	5.63352e+06	5.88908e+06	7.18265e+06	1.7233e+06	2.8894e+07	2.04613e+07	1.08437e+07	4.32684e+06	3.38061e+07	9.41587e+06	7.78482e+06	7.02435e+06	7.78065e+06
302	234.807	138.048	1.60181e+06	660873	459902	0	6.64602e+06	770419	0	1.10701e+06	4.0491e+06	6.11559e+06	0	197941	1.31495e+06	0	704215	466525	1.449e+06	8.85581e+06	2.61976e+06	4.11973e+06	2.23818e+06	1.69617e+06	2.23787e+06
303	151.611	85.0649	949386	780292	1.92869e+06	176700	150683	2.26107e+06	1.12721e+06	211110	0	913582	97415.2	0	47436.5	0	0	134609	0	396143	0	48010.1	446633	236522	353315
304	143.525	311.293	161368	9.98662e+06	152409	222185	39736.4	887096	903344	393697	158173	0	3.03462e+06	8.9121e+06	5.66082e+06	8.17357e+06	4.52335e+06	3.07526e+06	4.69361e+06	3.01699e+06	1.00267e+07	8.21548e+06	3.90073e+06	3.12859e+06	3.52479e+06
305	303.605	497.196	71280.9	0	0	0	0	0	0	0	50141.3	0	302462	694815	230447	301733	52447.8	322415	54461.8	190364	661158	194393	205913	78548.4	87266.2
306	354.045	160.107	5.69028e+06	2.70958e+06	5.16124e+06	2.49115e+06	1.78751e+06	2.28781e+06	3.46418e+06	2.54851e+06	3.26459e+06	6.69293e+06	877948	1.82777e+06	2.50223e+06	9.13908e+06	3.85216e+06	4.95826e+06	2.451e+06	213994	5.56771e+06	2.6616e+06	3.57571e+06	3.62174e+06	3.838e+06
307	534.177	147.112	1.88299e+07	80570.3	1.26214e+06	916284	8.91013e+06	953364	1.01062e+06	953728	6.75982e+07	2.19826e+08	766441	3.74998e+07	166231	421648	89764.1	1.11035e+08	115508	2.20654e+06	1.29521e+06	611693	1.95583e+07	2.18501e+07	1.55702e+07
308	103.426	229.142	461554	650638	753654	684152	474872	907958	508296	784158	147121	924239	6.42255e+06	1.90225e+07	1.32177e+07	1.65976e+07	8.4327e+06	5.06029e+06	1.08754e+07	6.08691e+06	1.77033e+07	1.10436e+07	7.47138e+06	9.86009e+06	7.02567e+06
309	165.598	193.085	6.87112e+06	1.77459e+06	4.49159e+06	1.23004e+06	828993	5.9104e+06	2.33209e+06	4.49534e+06	208347	1.03388e+07	8.78113e+06	2.26636e+06	7.28299e+06	8.84615e+06	3.32446e+06	3.65655e+06	4.93296e+06	1.06701e+06	5.84272e+06	5.32417e+06	1.72447e+06	2.41594e+06	2.52749e+06
310	243.447	263.075	4.90711e+06	1.02258e+06	1.06909e+07	958373	3.93606e+06	1.47139e+06	1.67656e+06	1.49689e+06	2.49945e+06	1.02725e+06	233585	474496	233035	722155	453712	2.28545e+06	342370	411016	914842	247106	1.23933e+06	1.50394e+06	1.01219e+06
311	208.802	245.185	4.09833e+07	1.09864e+07	5.44122e+07	7.58087e+07	1.69986e+08	1.64267e+07	1.19802e+07	7.62678e+06	7.80557e+07	7.42606e+07	7.16205e+06	1.12285e+07	3.21282e+06	0	692341	6.8656e+07	7.12185e+06	3.05488e+07	1.40088e+07	873804	3.81357e+07	3.48369e+07	3.23654e+07
312	115.256	296.124	0	0	0	108524	0	0	62994.1	0	0	0	139535	3.10344e+08	0	0	35972.7	0	47538.5	30536.7	145567	114390	1.38008e+07	1.43948e+07	1.49443e+07
313	208.773	265.153	2.81942e+07	2.67626e+06	2.88995e+07	2.05097e+07	8.37575e+07	4.36732e+06	2.18697e+07	1.23701e+07	1.37711e+08	1.69689e+08	3.37557e+06	3.223e+07	3.21791e+06	0	532538	8.86239e+07	1.03604e+07	4.28831e+07	1.08987e+07	703215	4.61046e+07	4.36282e+07	3.96831e+07
314	122.229	411.367	115388	71136	221870	377660	350997	0	212926	300802	433729	261271	3.9525e+06	391387	595262	275245	2.72953e+06	2.18137e+06	5.03164e+06	5.63601e+06	628662	416391	636352	598218	790956
315	130.929	164.091	9.08139e+06	327382	6.37817e+06	3.38676e+06	5.1932e+06	2.87915e+07	1.75209e+07	1.10833e+07	8.54717e+07	3.03196e+07	3.19704e+06	4.09422e+07	1.87268e+07	572058	372008	1.57389e+07	9.59344e+06	432518	1.99357e+06	1.0202e+06	1.46723e+07	1.38021e+07	1.40871e+07
316	49.343	331.08	7.24348e+06	1.51343e+07	1.98522e+07	8.58578e+06	1.52401e+07	8.20648e+06	9.83876e+06	2.59789e+06	8.49364e+06	1.20055e+07	0	125385	111409	199615	0	0	710329	0	139019	340766	4.1337e+06	4.22493e+06	4.45989e+06
317	386.582	189.122	1.07997e+07	834284	1.76845e+06	930826	889269	858454	1.08833e+06	1.00949e+06	109941	1.73898e+06	1.15224e+06	180197	248364	991119	1.12851e+06	1.38492e+06	2.35489e+06	2.37616e+06	984776	1.05345e+06	1.53705e+06	1.41176e+06	1.40246e+06
318	266.287	291.103	837179	586906	643388	799735	746829	1.24185e+06	1.87293e+06	1.27295e+06	503946	223083	245049	166587	481682	297047	1.18052e+06	30316.8	201520	199001	151116	495296	698929	930586	703448
319	274.397	238.092	713100	90997.3	215843	1.22794e+06	1.15343e+06	99740.4	88417.6	0	1.16446e+06	212650	181471	71093.4	75526.9	275519	0	342711	113781	258044	96743.4	51390.3	490891	624008	414161
320	62.5042	180.101	320959	759514	535860	105306	0	243312	295139	134150	0	1.48436e+06	1.17811e+07	8.64642e+06	7.14581e+06	6.95321e+06	1.27418e+07	1.21503e+07	6.60572e+06	8.26023e+06	9.89415e+06	9.64532e+06	3.30102e+06	2.27906e+06	4.03723e+06
321	33.3359	283.262	2.10418e+07	2.90872e+07	2.41172e+07	2.39441e+07	1.83561e+07	2.34711e+07	2.72376e+07	2.39879e+07	1.51664e+07	1.36412e+07	3.74337e+07	9.87793e+07	8.83879e+07	1.00154e+08	5.57375e+07	4.26829e+07	6.2427e+07	4.63635e+07	8.79101e+07	9.97603e+07	4.54801e+07	4.68192e+07	4.48652e+07
322	183.451	194.153	0	0	0	0	0	0	0	0	0	0	4.23763e+06	3.17241e+06	3.48584e+06	4.80685e+06	2.38474e+06	5.00897e+06	3.12806e+06	3.80329e+06	4.08963e+06	2.1757e+06	976031	1.597e+06	1.32372e+06
323	63.196	372.291	1.07994e+06	148919	4.75981e+06	390000	2.56519e+07	997913	912219	7.40617e+06	3.73207e+08	6.26368e+07	1.14713e+06	4.88657e+07	1.39598e+07	845296	1.57777e+06	4.59597e+07	1.60879e+07	2.87911e+07	1.83982e+06	207000	3.16176e+07	3.18202e+07	3.48827e+07
324	116.67	150.075	1.5049e+08	3.82597e+07	2.10952e+08	2.07213e+08	2.94028e+07	2.07487e+07	2.13382e+08	2.6757e+07	5.5821e+07	9.81492e+07	1.83559e+06	3.90982e+06	2.16819e+06	530810	2.6863e+06	4.85674e+06	1.71332e+06	718825	5.82623e+06	838362	6.77873e+07	6.55972e+07	6.45049e+07
325	34.4633	227.199	1.02693e+07	2.32776e+07	1.36656e+07	9.15311e+06	1.10918e+07	1.23329e+07	1.22523e+07	1.323e+07	4.08016e+06	2.50645e+06	2.48983e+07	7.42481e+07	8.16772e+07	1.18792e+08	4.61518e+07	3.78329e+07	5.13702e+07	4.59687e+07	8.1355e+07	7.52337e+07	3.28242e+07	3.28798e+07	3.31708e+07
326	175.903	258.115	1.11734e+06	169569	2.60173e+06	2.34398e+06	2.10984e+06	68522	0	0	5.63116e+06	2.48586e+06	3.35117e+06	2.51947e+06	546979	677359	164819	0	0	0	695115	1.24496e+06	1.83706e+06	1.74997e+06	1.44867e+06
327	255.888	223.106	7.0432e+06	365051	2.57278e+06	2.61133e+06	5.39996e+06	782691	3.96804e+06	2.90709e+06	3.27185e+07	3.07089e+07	369972	6.9582e+07	1.72307e+06	569378	1.56292e+06	2.26414e+07	2.59751e+06	1.09821e+07	2.30336e+06	1.3495e+06	1.17914e+07	1.18523e+07	9.80833e+06
328	361.969	297.054	1.74486e+06	74051.2	6.51701e+06	414540	2.75337e+07	1.05206e+07	1.92441e+06	20236	1.7856e+07	8.61682e+07	886062	1.97856e+06	1.12041e+07	363019	370497	5.18725e+06	1.42607e+06	10828.7	288039	13240.8	1.46516e+07	1.40425e+07	1.09799e+07
329	143.879	283.261	1.9441e+06	1.44149e+07	729767	661348	930652	514704	1.54734e+06	582944	993965	602377	2.22826e+06	7.60497e+06	5.45938e+06	6.65876e+06	3.39432e+06	2.23188e+06	4.0527e+06	2.25632e+06	7.75119e+06	7.20523e+06	3.68395e+06	5.70456e+06	2.99363e+06
330	80.0514	125.07	1.55077e+07	3.04391e+06	3.07718e+06	8.95486e+06	3.03504e+07	3.83244e+06	5.25122e+06	693408	2.87303e+06	2.99647e+06	5.31083e+06	3.15021e+06	1.86993e+07	3.09343e+06	3.54609e+06	4.00523e+06	5.55177e+06	8.06936e+06	5.24813e+06	6.48405e+06	7.48421e+06	7.03594e+06	7.35442e+06
331	238.898	182.08	3.19893e+06	1.40002e+06	3.37364e+06	2.55852e+06	974682	2.83405e+06	2.34171e+06	1.46258e+06	573332	2.18548e+06	1.0455e+07	3.09617e+06	2.2562e+06	1.4232e+07	3.37933e+07	9.4848e+06	9.18678e+06	1.61319e+06	2.16985e+06	4.82635e+06	3.83917e+06	3.82739e+06	4.21084e+06
332	425	134.044	1.62618e+06	504565	2.64692e+06	166237	3.09421e+06	220108	441669	857693	1.23928e+07	3.56622e+07	0	3.66817e+06	0	0	0	3.90772e+06	0	148101	0	0	2.53838e+06	2.44002e+06	2.29616e+06
333	141.653	167.069	2.23428e+07	1.80725e+07	2.66783e+07	2.37602e+07	2.50884e+07	1.91632e+07	2.45311e+07	1.65819e+07	1.59582e+07	2.65017e+07	3.8245e+07	1.39428e+07	1.38471e+07	1.92395e+07	2.86568e+07	2.50249e+07	1.94353e+07	7.08337e+06	2.40313e+07	2.60384e+07	1.95519e+07	2.5369e+07	1.82441e+07
334	125.567	284.293	2.6899e+08	1.53537e+07	8.57249e+07	1.49667e+07	1.26187e+08	4.76104e+07	1.9565e+08	7.37144e+07	3.6057e+08	1.6482e+08	2.47217e+07	1.15228e+08	1.42164e+07	3.04263e+06	4.41906e+06	7.87528e+07	2.75949e+07	8.80991e+07	3.09569e+07	1.87439e+07	8.93891e+07	9.49941e+07	1.02583e+08
335	251.536	345.143	9.29241e+06	49303.8	189103	252807	684619	88141.7	1.1982e+06	10244.8	694180	1.90069e+06	0	513662	0	0	0	690078	0	343133	183438	0	1.27496e+06	1.23795e+06	1.01332e+06
336	30.9051	411.36	1.70608e+07	9.89641e+06	1.04945e+07	1.12492e+07	1.18901e+07	1.51863e+07	1.51026e+07	7.85931e+06	1.6157e+07	1.5311e+07	1.18775e+07	1.57213e+07	1.59562e+07	9.76851e+06	1.35748e+07	1.57327e+07	1.29681e+07	1.71852e+07	2.82601e+07	1.29925e+07	1.0855e+07	9.68369e+06	9.33018e+06
337	202.631	178.085	461429	427946	601675	805086	83284.3	459101	86800.9	534122	289218	4.41527e+06	1.92481e+06	1.9926e+06	1.35351e+06	1.12613e+06	1.02363e+06	2.41985e+06	1.17257e+06	1.56126e+06	2.3616e+06	1.78492e+06	1.12123e+06	1.10953e+06	999517
338	134.499	493.132	4.216e+06	5.17857e+06	1.40633e+07	5.26365e+06	4.69842e+06	1.26583e+07	5.95667e+06	1.26272e+07	7.08893e+06	5.17811e+06	0	0	0	0	0	0	0	0	0	0	4.03993e+06	4.64817e+06	4.95058e+06
339	62.5425	181.048	2.25371e+07	6.25395e+06	1.83311e+07	5.00298e+06	1.03522e+07	2.07645e+07	2.12063e+07	8.99676e+06	9.26815e+06	3.15442e+07	8.81592e+07	1.58566e+07	8.66061e+07	6.69017e+07	2.67737e+07	2.42364e+07	2.01308e+07	1.15536e+07	1.30092e+07	9.78551e+07	2.52908e+07	2.49921e+07	3.83878e+07
340	432.404	339.153	1.53784e+06	406358	185258	217257	654740	816209	1.08738e+06	1.40676e+06	655613	180952	0	88646.4	0	144160	9105.12	67203.9	0	15497.9	91508.1	20602.5	759813	690797	664126
341	95.188	181.048	7.23642e+07	1.7116e+07	1.04436e+08	2.27457e+07	5.63948e+07	1.0865e+08	1.11641e+08	3.14569e+07	4.42596e+07	1.06771e+08	1.93728e+08	8.51254e+07	1.59752e+08	2.26737e+08	1.13654e+08	1.32708e+08	1.27172e+08	7.02322e+07	1.08041e+08	1.81633e+08	1.13772e+08	9.98097e+07	9.34571e+07
342	305.104	140.07	1.4534e+07	1.09528e+07	2.41024e+07	1.35078e+07	6.85557e+06	1.71684e+07	2.01524e+07	2.00156e+07	1.51123e+07	6.17534e+06	5.18758e+07	5.2062e+07	3.97329e+07	3.32283e+07	9.65366e+07	5.95675e+07	7.18628e+07	4.89934e+07	8.52653e+07	6.03167e+07	3.75748e+07	3.407e+07	3.33301e+07
343	271.774	180.086	7.20531e+07	2.9191e+07	6.40507e+07	9.33641e+07	6.42416e+07	2.49453e+07	4.54836e+07	7.84982e+07	1.0979e+08	3.88892e+07	1.5178e+07	4.3516e+06	2.62481e+07	2.85e+07	6.10582e+07	1.89484e+07	3.11212e+07	1.19282e+07	6.05537e+07	2.47175e+07	5.95912e+07	4.69524e+07	4.07463e+07
344	424.32	485.125	271009	112676	138552	181034	126679	159101	311442	76657.4	53288.5	83778.8	0	0	0	0	0	0	0	0	0	0	115967	89595.7	99472.5
345	353.24	288.201	2.24624e+06	28489.2	2.63811e+06	297997	7.35307e+06	639647	1.50209e+06	958062	1.04973e+07	1.49519e+07	183796	1.08738e+07	625242	528353	58549.4	7.49011e+06	618372	2.54172e+06	3.87689e+06	1.05747e+06	3.66392e+06	3.73967e+06	3.56115e+06
346	140.696	149.095	9.62204e+06	2.58215e+06	1.56336e+07	3.97597e+06	1.63467e+06	1.20565e+07	6.9135e+06	3.57483e+06	7.56545e+06	9.75481e+06	7.01237e+06	1.0958e+07	5.65928e+06	6.13908e+06	1.17269e+07	1.13079e+07	8.46964e+06	1.3913e+07	1.39481e+07	8.39388e+06	9.31074e+06	9.12448e+06	9.18058e+06
347	137.777	139.042	1.2067e+07	4.50446e+06	2.02137e+07	3.62733e+06	4.35644e+06	1.02402e+07	6.95298e+06	9.38682e+06	1.19019e+07	7.86398e+06	0	0	61922.1	0	105006	98811.1	642256	0	117306	981677	5.98755e+06	5.37565e+06	6.02932e+06
348	352.99	187.107	1.2546e+07	5.9578e+06	2.09967e+07	1.58218e+07	5.06202e+07	5.3838e+06	1.5773e+07	2.15024e+07	8.67442e+07	1.30395e+08	5.97602e+06	4.77327e+07	7.27636e+06	2.86738e+06	2.60761e+06	4.73584e+07	1.70094e+07	3.57398e+07	8.66488e+06	4.66633e+06	3.46863e+07	3.11862e+07	3.38463e+07
349	212.644	344.277	5.43402e+06	3.3733e+06	1.51749e+06	416968	2.09933e+06	1.63498e+06	3.11376e+06	333310	1.91671e+07	6.14674e+06	437537	2.92099e+06	508584	208561	686066	706501	912786	2.60996e+06	360555	507338	3.20187e+06	2.97559e+06	2.89745e+06
350	147.511	133.064	3.70124e+06	3.38842e+06	9.05996e+06	3.07936e+06	5.92789e+06	3.81644e+06	4.98615e+06	4.16911e+06	1.86157e+06	5.58686e+06	9.4131e+06	3.40263e+06	2.75779e+07	9.80959e+07	2.64979e+07	1.17093e+07	2.31389e+07	5.4549e+06	3.28818e+07	2.61243e+07	1.43904e+07	1.47331e+07	1.38711e+07
351	62.5759	397.38	8.5927e+06	9.12731e+06	1.05844e+07	1.09808e+07	6.93676e+06	3.18024e+06	6.17939e+06	6.53278e+06	5.34581e+06	7.10722e+06	1.27888e+06	0	0	0	630076	1.10032e+06	1.56268e+06	2.09299e+06	0	0	4.05533e+06	4.28954e+06	4.11232e+06
352	250.441	231.169	531681	27839.6	525711	1.02899e+07	3.31016e+06	172030	196252	171849	3.39613e+06	6.53326e+06	0	4.1687e+06	0	0	0	2.73773e+06	45015.6	787752	123098	14981.5	644409	725956	2.57598e+06
353	153.924	201.111	1.12365e+06	1.25213e+06	1.45862e+06	121533	1.23212e+06	1.5071e+06	579070	627305	385598	684603	7.77607e+06	2.30791e+07	1.71419e+07	2.14345e+07	9.56649e+06	1.81837e+07	1.36411e+07	7.73978e+06	2.36349e+07	1.34863e+07	8.44418e+06	9.06331e+06	9.5749e+06
354	269.526	288.117	2.11103e+06	4.72407e+06	4.03451e+07	4.86966e+06	877860	7.91158e+06	3.56347e+06	3.89853e+06	8.40637e+06	4.20146e+06	1.18879e+06	283924	1.08706e+06	1.29808e+06	2.43854e+06	3.80053e+06	1.70816e+06	260424	5.07436e+06	1.45204e+06	7.83922e+06	7.88003e+06	7.31426e+06
355	336.575	459.087	266299	20851.3	205271	110714	124886	176417	206466	132144	86589.9	193741	0	0	0	12786.7	0	0	0	0	0	0	100187	84264.4	84948.5
356	52.8949	425.339	0	0	0	0	0	92381.3	0	0	277810	98075.7	832686	1.09677e+06	890376	491758	667647	1.08735e+06	734169	1.04528e+06	1.01085e+06	1.09114e+06	668998	614648	569894
357	192.333	267.121	9.32662e+07	5.36388e+07	9.70885e+07	4.04777e+07	4.16476e+07	8.11327e+07	6.50707e+07	5.26955e+07	5.22591e+07	5.44654e+07	7.70033e+06	4.15494e+06	1.46808e+06	1.64975e+06	0	0	1.46315e+06	0	5.26238e+06	1.95078e+06	5.05144e+07	5.00209e+07	4.88236e+07
358	178.822	371.147	3.52942e+06	2.14504e+06	3.16335e+06	871653	645589	4.62318e+06	1.70921e+06	918655	1.81662e+06	564413	2.02201e+06	221852	731165	449790	478690	433146	877513	221948	675448	605293	1.27299e+06	1.80963e+06	1.33277e+06
359	360.591	110.027	4.77209e+06	0	960732	986660	845234	0	812861	1.54347e+06	4.41091e+06	0	391020	0	37092.3	45397.3	203451	3.97506e+06	0	3.86881e+06	579244	89788.7	1.1739e+06	1.10944e+06	1.49445e+06
360	51.135	411.36	1.91439e+06	1.86496e+06	3.53055e+06	2.89067e+06	2.94933e+06	5.18966e+06	2.53224e+06	2.64671e+06	6.03125e+06	2.02543e+06	3.02165e+07	2.46142e+07	1.96685e+07	1.41568e+07	2.08474e+07	1.8684e+07	3.27158e+07	2.51125e+07	2.4165e+07	2.36634e+07	2.28133e+07	2.16203e+07	1.78176e+07
361	275.452	251.105	842345	26920.5	383098	2.61818e+06	1.87493e+06	68466.4	650401	80914.6	603786	85442.8	186685	0	32420.5	25328.7	119786	1.17026e+07	0	7.35124e+06	1.22327e+06	0	1.62814e+06	1.77424e+06	1.07608e+06
362	173.383	307.261	0	0	0	0	0	0	0	0	0	0	827847	2.44116e+06	3.43856e+06	5.92729e+06	1.66089e+06	722658	1.52544e+06	783732	3.4307e+06	4.27773e+06	406278	1.00707e+06	523904
363	26.2881	369.349	1.50581e+07	9.02906e+06	9.01446e+06	1.09021e+07	1.1977e+07	1.5302e+07	2.95563e+07	1.61478e+07	2.4064e+07	1.88092e+07	1.90747e+07	1.60607e+07	4.63285e+06	2.29572e+06	3.86716e+06	1.56458e+07	1.08182e+07	1.64622e+07	1.21288e+07	1.10436e+07	1.60931e+07	1.40988e+07	1.28713e+07
364	133.292	256.262	2.94697e+06	770054	558324	559617	1.24145e+06	673072	1.47297e+06	686253	3.70582e+06	1.39885e+06	842717	1.50869e+06	412460	887980	974354	2.15761e+06	1.13332e+06	1.3123e+06	744025	640241	1.16279e+06	1.1882e+06	922015
365	282.93	215.138	3.34716e+07	6.33912e+06	8.33597e+06	3.75349e+07	2.07823e+07	3.81562e+06	8.02418e+06	1.47088e+07	5.43498e+07	1.75762e+08	1.96023e+06	1.91828e+07	1.07165e+06	1.50521e+06	840118	4.34163e+07	3.62686e+06	3.12529e+07	2.78392e+06	1.29384e+06	1.58242e+07	1.55925e+07	1.58847e+07
366	247.034	281.148	4.97825e+06	498062	3.42921e+06	4.53174e+06	2.58311e+07	1.08594e+06	5.22821e+06	1.46135e+06	3.31854e+07	7.31913e+07	333572	1.03249e+07	568057	104489	114202	1.52833e+07	1.63485e+06	9.80257e+06	2.93763e+06	375100	1.49594e+07	1.45172e+07	1.16474e+07
367	266.233	146.117	1.67479e+06	1.55499e+06	1.19675e+06	7.61339e+06	1.68922e+06	226442	2.21253e+06	4.37605e+06	845315	813680	1.8678e+07	1.21331e+07	3.03486e+06	3.14676e+06	5.33736e+06	1.0021e+07	5.84895e+06	3.74398e+06	4.70323e+06	1.28789e+06	3.19623e+06	3.24238e+06	2.08142e+06
368	224.952	341.303	880910	1.83656e+06	665853	233089	589490	7.71038e+06	383005	589840	974438	1.34874e+06	225886	854254	272421	116908	147769	1.08541e+06	424453	641777	515763	112354	900892	972639	974896
369	172.634	210.075	1.9997e+06	788745	3.38685e+06	206583	2.5375e+06	1.26645e+06	770882	1.28964e+06	109329	781556	963222	971273	496942	699476	919005	657815	438148	872813	737293	754110	971972	502271	1.19526e+06
370	242.724	180.101	2.80215e+06	1.96587e+06	4.0794e+06	2.61431e+06	909970	2.55915e+06	1.86433e+06	1.08307e+06	2.00335e+06	581687	5.89393e+06	2.76521e+06	4.30164e+06	3.10812e+06	7.97107e+06	4.38584e+06	5.80054e+06	6.72393e+06	3.74592e+06	2.17955e+06	2.41738e+06	1.86037e+06	2.72297e+06
371	250.993	271.098	1.46589e+06	2.07703e+06	2.36006e+06	1.2496e+06	1.22245e+06	957913	2.14122e+06	1.22063e+06	186081	693042	43952.1	0	33166	0	86114.5	0	20398.8	20957.8	0	27810.1	653078	619782	550178
372	146.118	150.112	3.7569e+07	4.05579e+07	3.26102e+07	2.61182e+07	3.07313e+07	4.17478e+07	3.72406e+07	5.66373e+07	3.27631e+07	2.65175e+07	3.87624e+07	1.09092e+07	3.64337e+07	5.51323e+07	2.93649e+07	2.04565e+07	3.36546e+07	4.28462e+07	8.07586e+07	3.94157e+07	3.90494e+07	4.03586e+07	3.69224e+07
373	387.681	217.128	2.22001e+07	5.02161e+06	7.23115e+06	3.71418e+06	1.52037e+07	1.40481e+07	1.2819e+07	4.77932e+06	9.21345e+06	9.58854e+06	1.79253e+06	5.43266e+06	9.61003e+06	6.4044e+06	1.42235e+06	3.88279e+07	5.11019e+06	7.73833e+06	2.20157e+07	7.27844e+06	9.50959e+06	9.88053e+06	9.94486e+06
374	175.792	277.215	112609	908190	171565	689918	98388.5	1.41891e+06	395473	731244	0	0	1.05323e+06	1.11907e+06	1.64488e+06	2.21369e+06	1.60586e+06	696725	1.23551e+06	721523	1.98099e+06	1.82659e+06	493939	541230	541963
375	441.603	435.165	8.78905e+06	1.8905e+06	4.30472e+07	2.10993e+06	6.81132e+06	2.94506e+06	8.05395e+06	2.0104e+06	3.00775e+06	4.09566e+06	16639.1	30945.3	27759.6	0	51389.5	224070	0	88497.1	67906.5	48966.2	6.91504e+06	6.67543e+06	6.81306e+06
376	284.469	369.113	5.97966e+06	1.22545e+07	5.26385e+06	8.28264e+06	2.11608e+07	8.1369e+06	4.8589e+06	3.88404e+06	2.99922e+07	1.52869e+07	0	0	328022	0	0	0	356379	0	0	0	7.31453e+06	8.90023e+06	6.37442e+06
377	231.386	313.126	1.57177e+06	2.65706e+06	6.08998e+06	2.84057e+06	2.14435e+06	3.33609e+06	4.46455e+06	743213	2.53999e+06	1.52437e+06	0	19000.8	0	40228.1	0	155575	0	163171	0	0	1.77449e+06	1.77447e+06	1.62187e+06
378	318.564	119.089	1.63514e+07	1.20106e+07	8.34238e+06	7.946e+06	2.12024e+07	4.4658e+06	1.66347e+07	1.02343e+07	3.08017e+07	4.89136e+07	1.3334e+07	1.3434e+07	6.5903e+06	6.31498e+06	9.79483e+06	1.65029e+07	1.30432e+07	2.09044e+07	1.05946e+07	4.7146e+06	1.34028e+07	1.45866e+07	1.20965e+07
379	177.524	129.065	3.18094e+06	1.01565e+06	1.48394e+06	2.72089e+06	1.90828e+06	3.64242e+06	1.76232e+06	2.41584e+06	1.44e+06	1.19994e+06	1.47502e+06	1.29892e+06	2.30931e+06	2.06408e+06	2.54193e+06	2.49215e+06	2.0987e+06	1.47441e+06	2.81696e+06	2.19457e+06	2.19099e+06	2.38847e+06	1.71195e+06
380	128.933	225.075	1.22289e+07	8.09088e+06	1.88254e+07	1.05091e+07	2.0179e+07	1.42183e+07	1.3457e+07	1.9988e+07	1.08e+07	2.00392e+07	2.66149e+06	2.54431e+06	2.14174e+06	1.5855e+06	3.7692e+06	3.27491e+06	2.02933e+06	3.30847e+06	5.24854e+06	2.09276e+06	9.03604e+06	8.81639e+06	1.03744e+07
381	195.935	151.075	0	0	0	0	0	0	0	0	0	0	1.49709e+07	1.44066e+07	9.22681e+06	1.18777e+07	1.57996e+07	1.86265e+07	1.09396e+07	1.61159e+07	1.56193e+07	7.77608e+06	4.67402e+06	4.79024e+06	4.34665e+06
382	129.097	270.278	1.03585e+07	1.5874e+06	3.46405e+06	425992	3.89537e+06	926052	9.04025e+06	3.28268e+06	9.28589e+06	2.9353e+06	3.48131e+06	6.02074e+06	451743	138312	113998	1.95224e+06	783262	5.38048e+06	1.20231e+06	1.08734e+06	3.82091e+06	3.36292e+06	3.55152e+06
383	319.339	579.168	1.50061e+06	1.2596e+06	5.02289e+06	1.57132e+06	1.21254e+06	1.62613e+06	1.11717e+06	1.29156e+06	370103	863743	0	32489	0	0	0	0	0	0	0	45827.2	1.10617e+06	1.30141e+06	968569
384	239.416	240.101	1.21198e+06	454817	385868	2.72143e+06	704852	9.24506e+06	2.33486e+06	1.89307e+06	1.94231e+06	4.19047e+06	719916	1.31534e+06	833795	249572	805741	993916	701958	576671	449525	286778	1.5295e+06	1.37438e+06	1.30488e+06
385	100.515	151.038	5.86146e+06	5.80071e+06	1.64727e+07	4.54249e+06	1.27853e+07	8.76344e+06	1.13978e+07	8.3982e+06	6.87643e+06	6.60988e+06	1.44765e+07	4.86572e+06	1.21747e+07	2.02424e+07	1.64722e+07	1.13496e+07	1.87945e+07	3.92406e+06	1.52979e+07	7.09709e+06	9.15013e+06	9.11771e+06	8.24959e+06
386	175.188	153.065	3.96708e+07	1.89135e+07	3.35843e+07	1.83728e+07	1.45213e+07	4.27695e+07	3.24661e+07	2.79786e+07	9.75092e+06	2.58354e+07	8.70595e+06	1.09159e+06	2.64006e+06	3.6488e+06	2.68235e+06	777278	3.31028e+06	1.14576e+06	2.69711e+06	4.78199e+06	2.08858e+07	2.04291e+07	1.84619e+07
387	227.732	102.091	864362	785396	822412	356082	802977	159705	260563	736868	2.12468e+06	8.53623e+06	1.81246e+06	1.01503e+06	654493	693790	1.20828e+06	5.00488e+06	2.1901e+06	1.35988e+06	1.61398e+06	293353	1.04632e+06	1.26485e+06	1.21463e+06
388	431.478	246.154	4.40793e+06	249524	2.03393e+06	2.5273e+06	3.14834e+07	768160	3.19188e+06	3.2374e+06	3.5295e+07	9.42931e+07	976852	1.64042e+08	2.2709e+06	0	889131	3.82877e+07	3.09754e+06	6.15409e+07	1.18607e+07	3.51952e+06	3.06036e+07	3.3026e+07	2.8614e+07
389	101.523	427.229	0	0	0	0	0	0	0	0	0	44256.5	1.49456e+06	2.32458e+06	799471	311734	1.10153e+06	1.20138e+06	720964	2.23568e+06	1.1181e+06	581358	433191	385790	110510
390	371.9	118.061	9.1128e+06	8.65978e+06	8.71136e+06	9.25521e+06	8.91732e+06	2.7688e+06	8.20799e+06	4.87105e+06	8.61205e+06	1.04768e+07	1.29211e+06	3.35802e+06	2.22359e+06	1.95212e+06	2.45836e+06	2.5873e+06	2.81886e+06	4.67866e+06	4.12831e+06	1.21227e+06	4.16282e+06	4.48465e+06	4.55059e+06
391	290.488	273.119	1.87433e+06	1.46759e+06	1.11396e+06	789903	1.48583e+06	1.85262e+06	752058	928619	329217	995935	0	0	0	0	0	0	0	0	0	0	996661	461032	1.37781e+06
392	112.678	130.086	3.04134e+06	1.28488e+06	4.16646e+06	2.59578e+06	2.17208e+06	1.18055e+06	3.99908e+06	1.51392e+06	2.5493e+06	4.42076e+06	591657	484048	412498	1.04308e+06	638899	781940	602309	651843	921835	223724	2.00417e+06	2.10772e+06	1.72248e+06
393	90.7162	265.251	181230	444278	2.86158e+06	6.34419e+06	317728	603940	7.35751e+06	3.88974e+06	768499	81837.2	226975	181501	0	0	0	4.32268e+06	0	3.09375e+06	876553	0	1.3949e+06	1.6989e+06	1.48506e+06
394	267.99	182.08	6.89263e+07	4.04367e+07	2.46669e+07	3.95378e+07	4.22268e+07	1.62668e+07	4.72276e+07	1.53885e+07	2.91211e+07	4.40666e+07	2.06406e+06	110829	3.1845e+06	6.12759e+06	1.41077e+07	8.1474e+06	3.95737e+06	1.34563e+06	1.02647e+07	2.48955e+06	2.39062e+07	2.2277e+07	2.38871e+07
395	414.605	290.158	1.07112e+06	575188	785035	128304	925434	704600	322105	584287	568978	898265	93977	291683	174542	107627	32705.8	337705	227432	583523	1.07895e+06	488350	586430	521603	539332
396	211.346	232.116	1.77392e+06	589955	86060.8	1.58474e+06	166292	1.17569e+07	1.25359e+06	826432	309350	1.15068e+06	33674.9	254178	0	112490	105318	465925	0	0	1.40267e+06	161991	2.05353e+06	1.91906e+06	1.96654e+06
397	395.761	247.127	2.81522e+06	446136	3.29002e+06	1.72385e+06	1.15906e+07	728137	3.61301e+06	1.78092e+06	1.81659e+07	5.75694e+07	165333	1.07054e+07	273785	2.25607e+06	123826	2.62982e+07	463872	7.33292e+06	1.70759e+06	274898	7.18287e+06	7.39783e+06	7.32723e+06
398	384.564	149.026	516835	642161	1.78777e+06	497102	3.67647e+06	570140	1.4442e+06	1.92389e+06	1.19583e+07	3.14747e+07	213263	5.09497e+06	1.06546e+06	0	360390	1.19725e+06	3.5057e+06	815464	568657	228611	5.42091e+06	4.73818e+06	2.79261e+06
399	398.495	306.153	64167.5	58687	516413	19575.6	311179	235991	175945	125434	342324	0	240078	310937	126293	260372	699494	3.12481e+06	574957	142185	1.92447e+06	630399	467204	508935	510724
400	192.408	180.087	2.55687e+07	1.59557e+07	3.49565e+07	1.38393e+07	7.47109e+06	1.25417e+07	1.49193e+07	1.19098e+07	1.67019e+07	1.55395e+07	1.09627e+07	8.48968e+06	294162	1.60284e+07	1.2074e+07	1.69763e+07	1.03003e+07	6.72247e+06	9.30258e+06	1.16659e+07	1.39889e+07	1.3145e+07	1.41234e+07
401	195.015	351.104	3.42981e+06	7.0655e+06	7.14815e+06	9.91022e+06	7.85386e+06	5.72478e+06	8.08671e+06	3.83352e+06	5.87206e+06	8.77588e+06	408034	0	43931.1	0	0	0	0	0	63485.9	0	4.72692e+06	4.92238e+06	448070
402	272.998	302.148	3.1091e+06	723798	1.86707e+06	1.77722e+06	6.45752e+06	126989	3.15177e+06	826452	1.81881e+07	3.25437e+07	1.23516e+06	4.39878e+06	308730	149562	356061	1.49082e+07	1.28946e+06	6.93607e+06	926799	155772	6.88437e+06	7.24052e+06	5.76616e+06
403	51.3958	471.351	3.25359e+06	2.93001e+06	3.35188e+06	3.7672e+06	2.16743e+06	4.7465e+06	2.7912e+06	3.78257e+06	2.33902e+06	1.54952e+06	8.07113e+06	1.25433e+06	1.09992e+06	1.04007e+06	1.04676e+07	5.41378e+06	1.26693e+07	1.44783e+07	916961	1.21989e+06	2.94078e+06	3.43614e+06	3.72566e+06
404	232.497	829.414	0	29757	0	0	0	32000.3	0	0	0	0	236997	500914	338557	470894	299749	234793	238237	320628	685240	228005	208863	171345	241549
405	451.591	276.143	2.63249e+06	1.58722e+06	2.09606e+06	3.82725e+06	2.98197e+06	2.26685e+06	2.72363e+06	4.4308e+06	6.55064e+06	3.36314e+06	2.14258e+06	718727	712202	2.54225e+06	1.26498e+06	7.10503e+06	1.44457e+06	3.69422e+06	8.63426e+06	1.18262e+06	1.48213e+07	2.50811e+07	1.13069e+07
406	51.2117	249.111	3.34013e+07	5.54059e+06	1.57029e+07	1.3752e+07	9.39959e+06	2.18701e+07	1.96957e+07	6.83408e+06	6.9312e+06	9.17211e+06	1.23977e+07	5.54044e+06	3.24186e+06	4.52801e+06	5.32354e+06	7.95509e+06	3.91341e+06	6.11757e+06	3.92296e+06	3.62425e+06	8.11031e+06	7.93014e+06	8.347e+06
407	139.62	387.198	8.40539e+06	1.36902e+06	1.42417e+07	2.5396e+06	3.53586e+06	3.75938e+06	3.41902e+06	4.30945e+06	4.33158e+06	9.4842e+06	1.47657e+07	1.07268e+07	2.04697e+07	2.16961e+07	2.17544e+07	1.41417e+07	1.36392e+07	1.78181e+07	1.79016e+07	1.65249e+07	9.47767e+06	1.15784e+07	9.72152e+06
408	249.693	177.101	652818	328744	1.04596e+06	310476	344229	588822	1.33561e+07	331287	259512	1.00884e+06	586592	396798	437499	779446	270267	688414	200505	668176	771516	131576	673381	661576	741997
409	346.592	519.108	107889	0	216339	21927.3	58992.3	57958.7	79666	34485.7	0	138876	128167	759646	59057.6	316846	127689	195346	54207.6	142442	230615	178714	158526	163543	137970
410	231.544	295.164	1.70307e+07	684173	8.95556e+06	1.0662e+07	3.57441e+07	2.11106e+06	5.36075e+06	1.75024e+06	2.08101e+07	4.55403e+07	729720	7.762e+06	797672	1.36354e+06	229102	1.36705e+07	1.40549e+06	8.51753e+06	7.10133e+06	431163	1.07194e+07	9.66697e+06	9.51403e+06
411	280.261	232.153	5.13921e+08	3.41537e+07	1.01149e+08	5.23945e+07	3.40734e+07	3.73913e+08	4.14608e+07	3.41444e+07	2.90214e+08	1.25523e+08	1.51524e+07	4.7169e+07	2.94069e+07	5.4305e+06	7.56036e+06	9.84174e+06	2.07804e+07	1.05769e+08	3.82383e+06	8.37559e+06	4.04817e+07	4.28658e+07	5.08388e+07
412	50.7495	401.157	8.90368e+06	4.03095e+06	5.33035e+06	5.85861e+06	4.16814e+06	2.02728e+06	7.11596e+06	2.14895e+06	4.19694e+06	4.3113e+06	463507	84389.2	148820	561760	90325.1	487409	589606	378444	192241	0	2.05711e+06	1.24423e+06	1.49497e+06
413	193.686	383.147	2.36253e+06	1.14367e+06	1.2979e+06	1.01818e+06	946194	1.22989e+06	496697	1.09037e+06	897488	863079	0	0	0	0	0	0	0	0	0	0	768629	217213	914716
414	191.86	111.055	2.89408e+07	5.61817e+06	3.22912e+06	7.01455e+06	1.39601e+07	5.17438e+06	5.13686e+06	6.32878e+06	1.2543e+07	1.26197e+07	6.04412e+06	5.20218e+06	8.1271e+06	8.03781e+06	9.76517e+06	2.34494e+07	7.32047e+06	1.58553e+07	8.44908e+06	6.92514e+06	1.02903e+07	1.12574e+07	1.04047e+07
415	33.6947	151.111	4.02347e+06	4.7778e+06	4.03686e+06	4.695e+06	3.75523e+06	4.79629e+06	4.57268e+06	5.04864e+06	4.23316e+06	2.50366e+06	1.0884e+07	9.67943e+06	1.00698e+07	1.20883e+07	1.20597e+07	1.16852e+07	1.13368e+07	1.21495e+07	1.21862e+07	9.08154e+06	7.49162e+06	8.1057e+06	7.83023e+06
416	234.719	294.132	3.67678e+06	7.95866e+06	1.54292e+06	2.55662e+06	517182	1.59415e+06	1.40899e+06	2.25619e+06	1.71484e+06	2.06525e+06	0	0	19730.9	41382.2	0	268430	0	0	0	0	1.13961e+06	1.18221e+06	972662
417	337.4	240.108	5.45479e+06	726453	9.49685e+06	4.02356e+06	1.18747e+06	1.9955e+06	2.54414e+06	1.11655e+06	808617	1.98042e+06	2.12053e+06	1.31388e+06	1.69425e+06	803983	3.00107e+06	1.99561e+06	1.46953e+06	1.17194e+06	1.7125e+06	1.52557e+06	3.4445e+06	3.01557e+06	2.76859e+06
418	412.759	268.101	43048	81206.6	707592	348306	202189	42816.2	55361.4	231210	873845	2.48628e+06	0	307915	7542.83	0	9578.75	352249	11114.5	61826.1	97415.4	11384.3	310163	222173	211315
419	299.645	249.111	1.74519e+07	796888	1.48037e+07	1.14482e+07	4.35809e+06	8.41078e+06	7.38226e+06	1.47649e+06	2.59882e+06	2.34324e+07	163244	0	0	0	20206.8	72871.3	0	49062.6	125312	18304	5.78278e+06	5.86754e+06	5.28671e+06
420	340.589	191.101	334541	91980.3	835332	1.74532e+06	3.51608e+06	165905	1.83495e+06	826445	6.27791e+06	1.75408e+07	143236	1.06668e+07	187946	70887.9	198432	5.35154e+06	524015	3.41172e+06	694651	147924	3.26052e+06	3.02703e+06	3.01068e+06
421	219.581	315.121	1.44241e+06	309092	1.93512e+06	469398	649777	387882	806684	1.19441e+06	231439	738802	28304.3	0	31327.1	79571	117035	29437	138141	54046.1	34123	76549.6	540331	409196	581822
422	348.637	429.077	303048	69486.1	217622	80215	223894	317643	149133	248526	110162	109709	0	0	0	0	0	0	0	0	0	0	105344	103561	88916.2
423	310.473	205.117	1.34621e+07	1.26889e+06	2.40215e+07	3.12378e+07	7.3885e+07	1.52399e+07	2.12969e+07	1.43513e+07	1.35797e+08	2.44547e+08	1.8381e+06	6.58713e+07	7.09931e+06	5.90934e+06	9.70947e+06	9.45942e+07	5.63173e+06	2.96394e+07	1.30133e+07	3.24808e+06	5.32257e+07	5.86631e+07	4.1714e+07
424	358.926	425.102	663629	281387	2.65933e+06	1.01045e+06	3.20921e+06	1.70988e+06	2.59177e+06	2.69975e+06	997321	129289	0	101795	0	0	0	0	0	10305.6	0	0	492349	642878	892789
425	355.314	449.104	271813	104458	157770	112986	173865	154533	187587	121795	58624.6	73030	0	0	0	13655.8	0	0	0	0	0	0	76658.4	51389.5	58680.3
426	383.78	90.055	1.32982e+08	1.23126e+07	1.06882e+07	1.51046e+07	1.19289e+07	4.0872e+06	2.65008e+07	1.18114e+07	1.73947e+07	1.8491e+07	5.09034e+06	6.09759e+06	4.28407e+06	2.08008e+06	2.37522e+06	1.07621e+07	3.74168e+06	9.92784e+06	6.70767e+06	3.30195e+06	2.25323e+07	2.10489e+07	2.05802e+07
427	88.6414	221.079	1.74997e+06	954873	1.14375e+07	5.31995e+06	4.46183e+06	4.45821e+06	5.06867e+06	5.77429e+06	2.09705e+06	3.05909e+06	340699	201207	183000	623220	158658	309924	196351	60795.6	365844	166720	2.89581e+06	2.27152e+06	2.5456e+06
428	374.127	220.104	8.42404e+06	2.211e+06	7.34209e+06	8.144e+06	2.06839e+06	7.46512e+06	2.53167e+06	1.16546e+06	5.80279e+06	3.44451e+07	0	84736.8	0	0	0	0	0	0	151187	0	148233	1.56664e+06	650741
429	245.339	453.134	21225.3	281883	170211	191253	220322	161897	430980	110608	214139	0	0	0	0	0	0	0	0	0	0	0	129511	137582	74215.3
430	67.7959	163.122	720818	761838	1.8198e+06	777169	1.56785e+06	1.15984e+06	577689	416910	1.26808e+06	4.24403e+06	4.25368e+06	2.3567e+07	2.59839e+06	1.51386e+06	2.10029e+06	6.94081e+06	1.22435e+06	5.13088e+06	5.70182e+06	3.12823e+06	2.29452e+06	2.54144e+06	1.88722e+06
431	433.224	303.175	82831.9	0	0	43020.6	89672.5	0	10125.3	11959.4	187100	313487	0	453304	0	59667.6	6189.91	59405.5	0	209252	0	7751.35	109595	72972.5	78083.6
432	237.127	217.153	2.28816e+07	5.22844e+06	4.0435e+07	4.36913e+07	1.85279e+08	1.18774e+07	2.1397e+07	9.15453e+06	1.16788e+08	3.73715e+08	1.44028e+06	3.13303e+07	2.31688e+06	27571.1	501583	1.04345e+08	7.94779e+06	5.11771e+07	1.51824e+07	1.26308e+06	4.97385e+07	5.17105e+07	5.16695e+07
433	290.798	154.085	150978	794010	50356.6	0	0	205335	0	0	0	0	4.35567e+06	3.0568e+06	2.6067e+06	4.81352e+06	4.39005e+06	4.77574e+06	3.61356e+06	3.41263e+06	6.5923e+06	2.9459e+06	576720	213264	261197
434	139.835	189.126	3.33266e+06	1.04091e+06	8.25998e+06	1.52208e+06	1.86933e+06	1.5003e+06	2.13174e+06	2.65502e+06	2.95093e+06	5.44853e+06	4.30234e+06	7.02729e+06	3.65312e+06	3.8767e+06	8.3968e+06	7.58641e+06	6.22149e+06	9.95441e+06	1.00922e+07	6.80789e+06	4.87501e+06	5.50238e+06	4.83064e+06
435	245.57	261.143	6.50135e+06	49193.9	1.25207e+06	267546	1.8393e+06	2.06865e+06	501668	630654	9.62297e+06	7.23512e+06	347317	4.04052e+06	413753	0	16595.4	2.56472e+06	827381	2.65108e+06	344582	81175.1	2.19318e+06	2.04239e+06	1.98859e+06
436	222.342	149.059	827697	648629	1.06071e+06	382900	702983	589843	871257	402332	250377	675278	519153	909957	495536	523200	726225	1.70916e+06	1.19149e+06	2.3285e+06	1.96562e+06	588840	944254	816775	788495
437	338.343	425.082	306050	0	373933	235650	305729	152636	289448	136932	109785	299188	0	0	0	0	0	22772.7	0	0	0	0	172083	183725	153597
438	127.34	675.612	0	0	0	0	0	0	0	0	0	0	1.19225e+07	0	0	0	1.24371e+07	7.4252e+06	1.56438e+07	1.67832e+07	0	0	2.21965e+06	2.47528e+06	1.78234e+06
439	195.538	339.106	2.81961e+06	274168	4.01347e+06	491761	647921	1.98834e+06	1.3178e+06	3.22122e+06	1.67253e+06	6.6733e+06	0	0	0	0	0	0	0	0	0	0	1.38408e+06	2.37141e+06	940059
440	97.4991	243.157	0	203562	133525	286600	61046.8	0	84644.8	285711	0	54528.9	2.40063e+06	6.79161e+06	3.86727e+06	4.97592e+06	4.63523e+06	1.77624e+06	4.82703e+06	1.71913e+06	6.23396e+06	6.18857e+06	1.21111e+06	1.98027e+06	926478
441	35.1059	247.204	0	434518	0	0	244553	0	374904	277457	2.06232e+07	1.91393e+07	227707	0	0	1.12063e+06	0	293542	0	324829	194840	0	3.15167e+06	2.7742e+06	2.87853e+06
442	444.819	703.166	0	12594.3	335979	47607	288398	7771.27	0	121847	515070	43480.3	19421.4	320722	206047	12120.5	0	98454.6	83688.1	5763.86	139094	51431.7	208530	143539	141489
443	413.267	437.124	285708	115702	486665	114370	2.03874e+06	1.76534e+06	246528	165610	329710	2.35773e+06	220704	378936	585889	216621	386326	153316	153986	203146	236226	383228	611046	666494	568563
444	50.1201	167.106	3.25016e+07	1.73241e+07	2.63043e+07	3.77654e+07	2.71176e+07	1.62769e+07	3.48387e+07	1.10034e+07	1.60417e+07	1.69154e+07	1.20263e+07	1.07447e+07	4.80113e+06	6.78838e+06	1.33927e+07	1.5838e+07	3.9585e+06	1.05319e+07	1.04698e+07	5.29693e+06	1.43103e+07	1.42313e+07	1.34162e+07
445	338.813	268.103	1.12472e+06	655877	2.54486e+06	623669	538142	283996	455135	614557	589540	921038	518399	191797	180651	59211	550525	740709	233326	641985	309076	296938	715167	607864	657784
446	30.0063	591.496	1.13711e+06	752776	861143	525402	412951	645864	677169	869820	824306	499262	244804	367831	411236	166858	127391	231442	209647	265729	496670	211315	366235	336689	352929
447	270.208	343.101	1.07184e+06	0	1.86207e+06	91222.9	829301	1.08837e+06	1.64495e+06	259520	305310	1.6786e+06	1.22536e+06	247923	1.07749e+06	623370	75273.7	766448	123756	239674	1.04089e+06	327178	845001	861012	964709
448	32.7186	107.085	1.78391e+06	1.60836e+06	1.10339e+06	916772	709987	1.32038e+06	1.0796e+06	2.13582e+06	1.68181e+06	998907	1.60496e+07	9.35224e+06	1.32611e+07	1.51636e+07	9.07599e+06	2.20378e+07	7.92192e+06	7.17566e+06	1.16065e+07	1.39451e+07	7.04523e+06	9.4862e+06	9.70076e+06
449	347.512	194.116	55574	0	0	0	0	68317.7	36297.9	37081.2	0	95979.9	3.64263e+06	2.84237e+06	2.38802e+06	1.14501e+06	3.74152e+06	4.77257e+06	1.25595e+06	3.41229e+06	4.21966e+06	1.4985e+06	1.28656e+06	1.27628e+06	1.33272e+06
450	172.789	734.564	4.54521e+07	1.50602e+08	9.33417e+07	2.83276e+08	2.23957e+08	2.28439e+08	1.98086e+08	3.25611e+07	1.50328e+08	3.11464e+08	6.08717e+07	2.9872e+07	3.26434e+07	1.06368e+07	7.17319e+07	2.34499e+08	5.65652e+07	1.94879e+08	1.02442e+08	4.10644e+07	1.5158e+08	1.5028e+08	1.35102e+08
451	200.078	347.131	470551	0	248377	0	101132	0	91355.7	138248	278771	558223	5.3134e+06	5.56129e+06	4.24461e+06	4.88136e+06	8.57486e+06	6.26483e+06	5.6456e+06	5.37409e+06	4.78265e+06	4.85843e+06	2.07915e+06	1.23012e+06	2.20287e+06
452	468.766	252.106	1.68482e+06	1.02512e+06	3.52238e+06	2.24292e+06	1.34795e+06	3.74995e+06	951908	2.20309e+06	6.04376e+06	1.98081e+06	923152	118271	0	0	0	4.1627e+06	0	152236	6.13494e+06	113096	4.86934e+06	4.74298e+06	4.16928e+06
453	429.622	259.127	1.1572e+06	312564	1.09811e+06	267338	447131	528029	753948	244543	1.93494e+06	2.04007e+06	74008.9	426275	28758.9	710070	62985.5	248543	230280	44037.4	2.01098e+06	768808	720715	650815	553073
454	402.884	118.086	5.05382e+07	9.98803e+07	5.85387e+07	2.65884e+08	4.1918e+07	1.09547e+07	3.74166e+08	4.71243e+07	2.72691e+07	2.22114e+07	3.49713e+08	4.56418e+06	4.76658e+06	2.15709e+07	5.00139e+06	8.71906e+06	1.11619e+07	6.53885e+06	3.58444e+07	1.34211e+07	7.96207e+07	7.8885e+07	8.04137e+07
455	320.383	145.133	512960	2.67582e+07	7.95459e+06	3.61393e+08	4.08206e+06	1.9631e+06	8.47561e+07	4.87316e+06	862653	5.67651e+06	1.28143e+07	2.66863e+06	2.72331e+06	2.01538e+06	66719.9	0	2.57026e+06	1.37992e+06	1.08105e+06	1.0297e+06	2.70276e+07	2.72994e+07	2.65641e+07
456	346.838	230.095	0	22417.9	0	6.87013e+06	2.11232e+06	433632	0	0	2.21436e+06	4.22809e+06	100641	0	147303	1.43571e+06	281635	1.171e+07	104769	5.87653e+06	914526	422953	1.47013e+06	1.47902e+06	1.45208e+06
457	77.2676	148.096	9.83138e+06	6.12633e+06	3.2809e+07	8.01857e+06	6.77895e+06	8.37962e+06	1.17943e+07	1.34275e+07	3.25123e+07	5.82936e+06	3.00493e+06	1.06281e+07	2.43243e+06	9.32602e+06	5.0228e+06	2.9034e+06	3.12539e+06	4.84306e+06	8.65215e+06	7.95423e+06	1.19688e+07	1.18648e+07	1.17635e+07
458	97.887	279.23	267415	1.34071e+06	997429	2.78639e+06	2.3554e+06	1.63673e+06	2.20162e+06	908122	210916	802156	1.21589e+06	637510	1.10434e+06	1.49534e+06	1.42756e+06	1.50142e+06	1.13502e+06	1.3265e+06	2.01812e+06	2.3742e+06	625839	1.45015e+06	460983
459	434.689	511.161	0	0	0	0	0	0	0	0	0	0	142118	608828	45892.1	15064.7	149588	459525	0	263688	164172	80700.7	83276.3	115592	51979.6
460	267.787	233.148	2.19565e+07	3.17557e+06	3.85144e+07	7.43693e+07	2.48741e+08	1.17527e+07	5.03699e+07	2.1173e+07	2.59154e+08	4.29131e+08	4.94669e+06	9.50255e+07	5.08821e+06	168108	1.03214e+06	2.26226e+08	9.24897e+06	9.80052e+07	4.37063e+07	2.63731e+06	1.15525e+08	1.1493e+08	9.78354e+07
461	193.189	312.128	0	1.58628e+06	4.35665e+06	621827	1.55308e+06	958625	737505	2.10275e+06	4.37786e+06	2.34796e+06	376830	134831	524170	1.03332e+06	604124	663044	933491	1.53631e+06	1.16425e+06	2.1622e+06	1.88685e+06	1.71951e+06	1.74773e+06
462	444.53	373.114	4.29303e+06	1.53968e+06	2.18933e+07	2.3087e+06	1.70111e+06	3.20928e+06	1.06626e+06	3.97145e+06	4.48264e+06	3.40842e+06	0	0	0	0	0	0	0	0	0	0	2.78803e+06	2.791e+06	2.89518e+06
463	403.928	258.109	2.11797e+09	1.91864e+08	9.68482e+08	2.41649e+08	1.10142e+09	5.63674e+08	6.28828e+08	6.96272e+08	9.40701e+08	8.6158e+08	1.68239e+08	6.94537e+08	3.44724e+08	1.68816e+08	1.1935e+08	9.58667e+08	2.6822e+08	5.63452e+08	4.8897e+08	3.52445e+08	8.50128e+08	8.02563e+08	8.15439e+08
464	60.8492	319.116	2.66324e+06	0	193432	0	725422	805668	399907	1.61714e+06	170739	157453	745984	362284	1.14833e+06	4.70626e+06	1.97161e+06	1.33781e+06	3.13337e+06	962902	3.07619e+06	2.42983e+06	1.87153e+06	1.74723e+06	1.71104e+06
465	72.9211	116.07	5.44557e+06	2.33416e+06	1.01499e+07	9.46915e+06	1.07711e+07	2.90027e+06	9.05716e+06	3.80538e+06	1.78295e+07	2.39653e+07	4.38326e+06	1.05707e+07	6.18455e+06	1.12808e+06	6.78841e+06	9.02228e+06	6.41696e+06	2.44876e+06	1.30075e+07	1.70535e+06	8.36431e+06	7.65609e+06	9.41259e+06
466	192.5	600.261	6.30278e+08	3.53572e+08	6.82707e+08	2.72837e+08	2.76349e+08	5.31958e+08	4.34719e+08	3.78847e+08	3.51805e+08	3.60323e+08	5.54306e+07	3.41496e+07	1.27111e+07	1.13655e+07	2.67922e+07	1.83662e+07	1.09143e+07	1.01415e+07	3.11055e+07	1.66887e+07	3.08691e+08	3.31248e+08	3.12705e+08
467	33.605	323.256	336096	1.66024e+06	820607	277979	2.16962e+06	155024	976358	2.08951e+06	27757.5	68605.9	7.32374e+06	3.51172e+07	3.74982e+07	3.29756e+07	1.44237e+07	9.44835e+06	1.59227e+07	1.21402e+07	2.63831e+07	3.70826e+07	1.29491e+07	1.18029e+07	1.28137e+07
468	339.157	591.144	143866	134108	262719	116444	518183	255430	440860	78194.8	13271	0	0	0	0	0	0	0	0	0	0	0	170164	126360	136249
469	146.264	245.137	230461	449524	485884	359633	952029	382359	84119.6	1.09031e+06	128300	139037	2.05755e+07	5.16086e+07	3.54277e+07	4.21934e+07	2.28279e+07	2.0687e+07	2.80668e+07	1.6343e+07	5.03419e+07	2.8279e+07	1.83126e+07	1.78051e+07	1.88024e+07
470	139.911	135.116	0	1.91641e+06	9.47871e+06	361449	1.44735e+06	1.19592e+06	3.11221e+06	3.32787e+06	3.6239e+06	6.74155e+06	3.42291e+06	4.05314e+06	3.57183e+06	4.34674e+06	7.03601e+06	6.05837e+06	5.03939e+06	7.3852e+06	9.06683e+06	4.99129e+06	4.29824e+06	4.11004e+06	5.50299e+06
471	279.684	219.133	1.3186e+07	6.32829e+06	4.90668e+07	7.43317e+07	8.81048e+07	6.46971e+06	4.89481e+07	5.55417e+07	2.43286e+08	2.5548e+08	1.07286e+07	1.06085e+08	5.56787e+06	0	324763	1.76311e+08	1.25916e+07	5.22446e+07	1.1756e+07	1.13286e+06	1.13e+08	1.02527e+08	1.08283e+08
472	300.271	184.096	808014	537478	1.9933e+06	531338	515383	2.10545e+06	934799	2.18239e+06	2.25608e+06	101159	6.11039e+06	5.46006e+06	5.62305e+06	1.06361e+07	1.39842e+07	6.70613e+06	1.3338e+07	1.17958e+07	2.02507e+07	1.91973e+06	4.05274e+06	8.57905e+06	3.2236e+06
473	346.859	130.086	4.50215e+07	3.59224e+07	2.91116e+07	3.30671e+07	2.29769e+07	1.42846e+07	3.76554e+07	2.29424e+07	8.51945e+06	2.63099e+07	4.52182e+06	2.48334e+07	5.02902e+07	3.81913e+06	3.80169e+06	2.14592e+07	2.16084e+07	5.12406e+07	3.09702e+07	1.7808e+07	2.68864e+07	2.57053e+07	2.85753e+07
474	188.293	301.105	939207	1.51598e+06	1.42928e+06	927635	531306	1.45315e+06	1.1484e+06	1.2272e+06	494561	679419	0	42090.1	0	503253	162039	96869.1	214322	0	53200.1	50909.7	661275	444832	814315
475	418.423	241.128	278366	0	281938	0	731413	0	0	0	740309	609702	0	2.20822e+06	0	0	0	405266	0	77569	58694.1	0	361505	347201	260036
476	346.869	177.086	3.65409e+06	326078	1.17524e+06	3.35952e+06	4.13823e+06	472588	2.94387e+06	1.95038e+06	8.43541e+06	2.07053e+07	251003	1.34038e+07	515484	24502.9	170805	1.00715e+07	325720	6.59855e+06	1.28195e+06	501304	2.94805e+06	4.37054e+06	2.82438e+06
477	432.94	213.122	2.04336e+06	7.48271e+06	1.10956e+07	1.50809e+07	2.8762e+07	5.15868e+06	7.09232e+06	5.3726e+06	4.13454e+07	4.15065e+07	9.15028e+06	1.42475e+07	2.549e+06	3.81496e+06	2.38027e+06	2.76739e+07	1.04992e+07	1.96919e+07	1.48253e+07	8.08515e+06	1.47481e+07	1.39783e+07	1.41401e+07
478	252.846	254.087	1.24498e+07	564849	3.35489e+06	1.29637e+06	258623	529782	2.15846e+06	497736	3.54851e+06	684905	451413	405876	352945	306985	505153	729312	345993	570244	616186	566242	1.49575e+06	1.43539e+06	1.20757e+06
479	210.442	181.049	5.55407e+07	3.65508e+07	8.55448e+07	1.20233e+07	3.53704e+07	4.17032e+07	5.58052e+07	1.79529e+07	2.76006e+07	1.21177e+08	1.68158e+07	6.97138e+06	2.53203e+07	2.16397e+07	7.42562e+07	1.22729e+07	2.43194e+07	2.28702e+07	8.51222e+06	8.24756e+06	3.0115e+07	3.06573e+07	2.51122e+07
480	452.006	260.111	2.76759e+06	2.35319e+06	1.4302e+06	2.23671e+06	699756	1.19626e+07	1.4403e+06	1.63171e+06	1.28751e+06	2.1372e+06	906655	0	173874	261380	226432	1.01255e+06	161072	330790	1.87915e+06	104928	2.37356e+06	1.74586e+06	2.18516e+06
481	51.0303	385.126	5.27114e+06	6.11599e+06	4.82111e+06	5.85012e+06	8.03809e+06	1.03176e+07	9.51246e+06	4.04772e+06	5.09922e+06	7.85922e+06	743214	220282	862950	1.8132e+06	409933	138359	1.06148e+06	0	356134	287957	3.13153e+06	2.48305e+06	3.25629e+06
482	451.546	278.122	4.34527e+06	2.16066e+06	2.44766e+06	3.58719e+06	1.41141e+06	1.87493e+07	2.60903e+06	2.90423e+06	2.27171e+06	3.93323e+06	1.58381e+06	276192	366073	645517	366067	1.80888e+06	315922	770214	3.37935e+06	208682	4.20875e+06	3.13649e+06	3.42981e+06
483	74.09	227.127	0	0	380659	0	0	0	0	0	1.08162e+06	178645	1.64367e+07	1.63046e+07	1.68217e+07	1.5849e+07	1.98655e+07	1.92874e+07	1.41685e+07	2.00798e+07	2.5722e+07	1.34548e+07	9.04745e+06	7.867e+06	8.58388e+06
484	303.182	221.091	1.17852e+06	227961	430281	451418	1.29211e+06	284737	346970	790027	1.46715e+06	5.78409e+06	129808	1.03043e+06	204693	35227.1	310515	1.17668e+06	126942	552129	119104	25003	793965	852790	597222
485	195.765	329.121	9.02284e+06	2.94253e+07	2.53082e+07	3.89549e+07	2.42961e+07	1.71111e+07	3.4078e+07	6.31386e+06	2.22542e+07	1.37168e+07	701165	1.0706e+06	785286	1.01296e+06	1.85645e+06	1.41673e+06	880743	1.06291e+06	908929	903759	1.47523e+07	1.50444e+07	1.4674e+07
486	92.6133	209.079	6.08253e+07	2.77463e+07	3.99462e+07	3.27211e+07	4.2877e+07	3.16059e+07	8.51907e+07	3.32208e+07	3.34889e+07	4.78938e+07	1.33996e+06	2.18769e+06	2.81917e+06	6.84951e+06	2.49803e+06	3.28603e+06	9.57006e+06	2.42681e+06	1.52723e+06	5.10253e+06	1.9525e+07	2.15557e+07	1.91215e+07
487	195.069	167.069	2.08286e+08	5.27532e+08	5.03447e+08	7.23134e+08	4.55388e+08	3.63444e+08	6.70671e+08	1.34688e+08	4.51145e+08	3.17982e+08	9.318e+06	1.08505e+07	3.66059e+07	1.86014e+07	1.00595e+07	1.64105e+07	1.57102e+07	9.27432e+06	6.66305e+07	8.95675e+06	3.23204e+08	3.03641e+08	2.88624e+08
488	211.517	862.621	1.64205e+07	1.27198e+07	1.29639e+07	7.00736e+07	4.65377e+07	4.90425e+07	3.69701e+07	2.04675e+06	1.25713e+07	6.31634e+07	1.58597e+07	784610	5.6787e+06	2.44382e+06	1.90649e+07	3.45886e+07	1.22857e+07	3.50353e+07	1.60535e+07	6.61415e+06	2.56609e+07	2.53765e+07	2.2553e+07
489	243.011	322.174	750926	30131.2	210403	352715	1.54491e+06	55984.2	211429	25835	310800	2.10532e+06	369110	246190	528278	199279	1.75328e+06	641018	210425	231728	1.02595e+06	441858	309569	459392	310939
490	213.259	88.1122	1.07909e+06	7.81255e+07	2.09498e+06	683294	1.04433e+06	2.21719e+06	2.17732e+06	5.08118e+07	2.51342e+06	895355	503251	398757	1.40107e+06	934193	380820	1.50548e+06	1.99068e+06	534235	523414	414632	1.22847e+07	9.95776e+06	1.03354e+07
491	354.368	105.074	2.6686e+06	362726	237135	100276	330973	125473	773171	62927.8	591999	441840	333508	429554	149374	158468	275507	294040	141927	137980	492978	219106	465348	434809	457094
492	29.8938	395.366	1.22127e+07	1.39001e+07	1.01926e+07	1.47787e+07	1.55322e+07	1.1546e+07	1.69761e+07	2.4025e+07	6.37792e+06	2.07785e+07	1.66607e+07	2.80833e+06	4.90519e+06	5.07078e+06	1.19783e+07	3.51489e+06	7.9124e+06	3.55979e+06	5.89145e+06	5.14542e+06	1.54126e+07	1.35876e+06	6.03947e+06
493	31.1412	437.339	2.72547e+06	2.30972e+06	1.19812e+06	2.45393e+06	1.86044e+06	1.07481e+06	2.02015e+06	2.88669e+06	2.99013e+06	1.53206e+06	244575	0	255279	256315	477942	117255	312609	257018	0	419234	634292	500689	767980
494	36.0673	207.137	5.61076e+06	5.49668e+06	7.27443e+06	5.1635e+06	6.3435e+06	6.79868e+06	7.39917e+06	370074	5.4272e+06	5.01848e+06	2.12526e+07	1.90741e+07	1.56358e+07	1.84792e+07	2.34393e+07	2.40955e+07	1.33751e+07	2.10662e+07	1.92938e+07	1.52528e+07	1.2967e+07	6.037e+06	1.20157e+07
495	415.955	102.055	2.01416e+06	2.73196e+06	6.01183e+06	2.7691e+06	1.14118e+07	1.15709e+06	2.88967e+06	3.40458e+06	3.45587e+07	4.95766e+07	3.15915e+06	1.79722e+07	979414	698614	769194	9.49462e+06	583883	2.72699e+06	1.68584e+06	668540	8.41305e+06	8.17877e+06	8.27619e+06
496	402.933	101.06	5.30994e+06	1.43036e+07	7.92707e+06	4.51194e+07	5.07647e+06	2.26308e+06	6.50624e+07	4.91028e+06	1.1727e+06	1.1018e+06	6.39003e+07	1.14002e+06	1.29865e+06	2.97294e+06	1.18518e+06	1.50204e+06	1.27207e+06	1.21882e+06	5.51494e+06	1.85757e+06	1.21568e+07	1.1198e+07	1.22026e+07
497	458.518	245.112	794739	265227	1.13255e+06	824673	345586	785589	1.33444e+06	729921	1.86814e+06	1.37168e+06	117892	261471	83521.2	35518	64658.6	798654	131598	188089	1.0371e+06	497449	868411	752971	846463
498	327.494	340.054	353296	181246	0	0	933548	1.09804e+06	744383	286300	3.81632e+06	3.51247e+06	141879	1.89614e+06	98073.8	0	99377.7	592013	30117.4	223242	396561	339546	706063	794422	317035
499	86.2665	98.06	1.12652e+06	1.08533e+06	2.70464e+06	3.45985e+06	609051	343308	3.81196e+06	470169	2.56106e+06	5.62667e+06	541984	523668	306835	1.35522e+06	539888	829728	480962	375923	783731	536434	1.70444e+06	1.3039e+06	1.40366e+06
500	95.2662	541.259	7.01639e+06	3.27507e+06	2.5815e+06	1.41593e+06	3.90477e+06	4.89331e+06	2.91634e+06	5.90792e+06	3.2154e+06	3.31866e+06	663743	2.70024e+06	1.07212e+06	1.69722e+06	1.07284e+06	379042	717720	1.29603e+06	3.49506e+06	1.74342e+06	3.4835e+06	2.91828e+06	3.38701e+06
501	78.9056	223.095	0	226180	0	347313	0	0	194716	0	0	285553	6.27215e+06	1.36148e+06	6.25324e+06	1.78511e+07	1.0142e+07	5.04247e+06	1.07822e+07	2.65597e+06	8.15748e+06	9.33484e+06	3.85393e+06	4.90398e+06	4.80302e+06
502	119.165	249.111	5.12775e+07	2.95242e+07	4.7828e+07	1.10339e+07	3.2788e+07	5.9666e+07	2.05672e+07	3.27984e+07	1.91428e+07	7.27412e+07	6.31465e+06	647397	1.58623e+06	3.20662e+06	4.26108e+06	1.56069e+06	1.16653e+06	1.12588e+06	3.0123e+06	2.23844e+06	2.31908e+07	2.45344e+07	2.2508e+07
503	141.52	217.085	5.96947e+06	9.23593e+06	4.31584e+06	5.79504e+06	4.08315e+06	1.02474e+07	8.12874e+06	4.34156e+06	3.92692e+06	2.76381e+06	4.34153e+07	1.46763e+07	1.27995e+07	1.96046e+07	3.65596e+07	2.85263e+07	2.26182e+07	8.08805e+06	2.78468e+07	2.48434e+07	1.44326e+07	1.67298e+07	1.47693e+07
504	374.604	274.185	508984	0	1.1069e+06	0	1.52947e+07	0	777547	1.57048e+06	3.99137e+07	7.78579e+07	0	3.43673e+07	318548	540624	177702	1.12838e+07	1.68102e+06	1.28895e+07	1.58727e+06	505877	1.12996e+07	1.17812e+07	9.90438e+06
505	102.311	217.142	0	872298	422862	165760	228639	338527	135934	0	99472.4	115056	7.55134e+06	8.35571e+06	7.04593e+06	5.3107e+06	6.90429e+06	8.62222e+06	5.03724e+06	1.05998e+07	1.14572e+07	4.5752e+06	5.37719e+06	5.03331e+06	4.98391e+06
506	423.503	290.133	884142	74213.8	267079	108460	242783	124605	12909.3	81281.5	452953	760651	18935.3	435900	100030	74690	15154	1.12424e+06	6162.4	172712	1.12679e+06	87866.1	353053	367326	372379
507	78.4492	124.112	3.87022e+06	2.90787e+06	1.52551e+06	6.28887e+06	3.57847e+06	1.03723e+07	4.59075e+06	3.16444e+06	2.2454e+06	1.63959e+06	7.45261e+07	4.27857e+06	8.17904e+06	3.65817e+07	3.27025e+06	3.96259e+07	5.24411e+07	1.84489e+07	3.18535e+07	1.67236e+07	8.86423e+06	9.47534e+06	4.6442e+06
508	467.069	204.133	230056	259118	1.45442e+06	473318	637471	189675	166724	449743	2.55971e+06	4.94275e+06	223115	1.6244e+07	341120	113118	97050.2	614573	108221	1.19426e+06	537248	496031	992015	961414	1.02918e+06
509	218.197	208.132	328670	1.9551e+06	1.90483e+06	3.76681e+06	1.38722e+06	3.23874e+06	1.14655e+06	2.4679e+06	7.0835e+06	6.68788e+07	1.65074e+07	3.12177e+06	5.03393e+06	705924	3.54491e+06	1.88806e+06	3.11564e+06	1.35349e+07	3.17502e+06	3.29381e+06	6.41886e+06	6.37131e+06	5.58308e+06
510	174.63	318.298	4.03453e+06	1.11267e+07	9.50605e+06	3.45197e+06	6.86789e+06	8.07125e+06	7.85556e+06	1.14789e+07	2.88424e+07	1.84426e+07	1.25165e+06	2.26503e+07	479656	2.5243e+06	261938	5.83674e+06	2.06878e+06	2.62727e+06	729733	1.66006e+06	1.08113e+07	1.0267e+07	1.22907e+07
511	442.578	423.129	137324	27564	2.19979e+06	122263	323838	141128	524744	442516	466342	147319	10274.3	0	0	0	0	0	4885.39	0	0	0	406855	398134	404943
512	354.817	255.144	375483	28305	985242	594378	2.10027e+06	75679	691310	305555	4.77424e+06	5.92266e+06	202407	1.45267e+06	661216	631160	155936	3.50986e+06	148378	1.03251e+06	1.10408e+06	299695	1.27821e+06	1.19042e+06	1.3581e+06
513	395.64	274.185	6.83588e+06	73353	2.18227e+06	1.74176e+06	2.77837e+07	562655	325446	2.57691e+06	1.46475e+07	4.47717e+07	0	2.9939e+07	1.03075e+06	0	270162	5.94414e+06	1.28883e+06	1.75381e+07	2.14775e+06	2.28442e+06	1.03749e+07	1.00233e+07	9.26985e+06
514	192.506	231.1	2.01942e+07	1.20117e+07	2.25812e+07	8.49456e+06	9.22526e+06	1.77094e+07	1.45904e+07	1.13199e+07	1.11362e+07	1.21445e+07	3.06344e+06	1.88906e+06	1.76776e+06	1.64702e+06	2.62222e+06	1.89965e+06	1.8662e+06	1.56407e+06	3.02216e+06	1.20847e+06	1.11237e+07	9.9084e+06	9.66786e+06
515	229.46	639.189	619341	785520	401365	285554	703382	1.29304e+06	331390	747856	207525	594159	0	0	0	0	0	0	0	0	0	0	273289	253230	309429
516	192.604	452.28	2.42473e+07	2.08508e+07	1.81287e+07	1.48351e+07	2.39722e+07	1.84454e+07	2.04875e+07	2.50085e+07	0	0	4.18428e+06	1.10565e+07	3.92515e+06	3.83795e+06	2.2051e+06	2.84904e+06	3.33211e+06	2.43708e+06	5.83787e+06	6.70691e+06	1.24679e+07	1.23319e+07	1.25547e+07
517	224.454	506.357	1.69742e+06	0	122126	41041.5	173324	1.4249e+07	1.21632e+06	0	132967	612961	0	0	16976.6	0	0	384400	0	52513.2	0	0	911593	905946	738683
518	314.966	166.085	2.55643e+07	7.77638e+06	2.25219e+07	6.76144e+07	7.61551e+07	1.85021e+07	2.88179e+07	2.89162e+07	8.22537e+07	1.26247e+08	2.90167e+07	6.99678e+07	2.48624e+07	8.55036e+06	1.78467e+07	6.04231e+06	3.10408e+07	5.81699e+07	3.48334e+07	2.13662e+07	4.67412e+07	5.55801e+07	3.8959e+07
519	370.041	125.02	1.27109e+06	197001	652439	662668	770948	2.5314e+06	825275	736057	1.1169e+06	1.42574e+06	154085	737094	349327	0	59081.5	1.25848e+06	43751.6	267899	425200	311832	1.00305e+06	1.24441e+06	1.30795e+06
520	223.143	302.231	389070	3.4272e+06	2.39548e+06	227951	4.00912e+06	3.02628e+06	244380	788475	2.74429e+06	2.27687e+06	173817	1.69575e+06	666805	170727	140658	625926	487997	3.08572e+06	909545	1.26172e+06	1.79075e+06	1.53784e+06	1.60685e+06
521	246.202	215.127	449327	660163	741409	289519	330499	554578	697030	572362	795536	1.17571e+06	2.48344e+06	3.83714e+06	3.58836e+06	2.9952e+06	1.64186e+06	2.13405e+06	2.43738e+06	3.18819e+06	4.04465e+06	4.16662e+06	1.73168e+06	1.48635e+06	2.17853e+06
522	265.472	547.142	671867	1.81784e+06	3.07428e+06	1.15228e+06	1.26333e+06	2.16256e+06	1.48229e+06	140054	543852	171604	0	0	0	0	0	0	0	0	0	0	734696	650125	647203
523	49.3738	147.043	4.90698e+06	1.079e+07	8.37318e+06	1.01313e+07	5.83936e+06	4.08012e+06	6.16069e+06	2.59426e+06	5.9217e+06	6.47889e+06	2.40079e+06	2.70236e+06	2.80488e+06	1.85759e+06	4.01487e+06	3.18534e+06	2.37884e+06	2.24233e+06	1.85286e+06	2.27447e+06	2.4848e+06	4.02988e+06	3.57727e+06
524	200.594	427.358	3.87172e+06	1.17883e+06	2.3008e+06	304665	3.56796e+06	94092.3	4.79569e+06	2.5179e+06	1.73615e+07	1.19739e+07	596776	2.5053e+06	240640	620205	816319	1.23572e+06	150621	3.04885e+06	837438	2.52776e+06	2.92676e+06	2.98018e+06	2.91161e+06
525	166.505	687.373	419935	2.69163e+06	1.86021e+06	0	1.02857e+06	699043	1.37669e+06	1.22362e+06	0	0	337500	3.34272e+06	874577	2.05882e+06	622898	237593	693314	239830	1.29148e+06	1.82029e+06	871786	1.41371e+06	1.10596e+06
526	224.024	433.111	934652	442471	1.80858e+06	315239	342214	103649	325754	254472	483121	956244	32999.7	0	0	0	15829.2	0	0	0	0	0	408854	395463	370481
527	349.622	473.103	1.55983e+06	638389	1.46939e+06	1.10453e+06	841595	1.52822e+06	1.24729e+06	721857	777823	687717	28113.1	23218.9	0	0	0	29698.7	0	107664	0	16737.7	648770	625542	556516
528	362.85	90.055	3.42711e+07	2.48323e+07	1.62999e+07	1.2921e+07	2.08965e+07	1.51198e+07	2.57503e+07	2.88231e+07	2.52723e+07	2.86895e+07	5.10459e+06	4.41245e+06	1.0746e+06	2.32967e+06	2.13622e+06	1.39365e+07	3.74989e+06	1.21253e+07	2.38778e+06	1.90701e+06	7.64831e+06	8.14468e+06	1.44689e+07
529	212.379	263.141	869098	304456	4.19398e+06	1.01258e+07	2.91104e+07	224153	204270	519566	2.23727e+07	3.77466e+06	694870	277508	1.27076e+06	709733	2.69868e+06	3.20805e+07	1.64985e+06	2.37968e+07	5.85451e+06	1.74413e+06	7.69384e+06	7.06392e+06	6.75693e+06
530	148.074	316.283	3.40763e+08	8.40171e+07	1.50008e+08	1.19146e+07	2.06956e+08	4.46962e+07	3.65725e+08	2.05923e+08	3.85876e+08	5.26704e+07	8.52516e+07	2.07782e+08	2.51908e+07	9.5275e+06	1.40823e+07	7.48316e+07	4.88629e+07	1.73534e+08	4.27221e+07	3.77267e+07	1.40278e+08	1.46643e+08	1.45618e+08
531	321.273	146.08	8.02046e+06	9.55961e+06	1.04487e+07	2.51764e+07	5.24283e+06	7.44744e+06	6.5123e+06	1.29938e+07	4.68758e+06	3.45592e+06	2.84544e+06	1.05222e+06	3.14955e+06	2.39767e+06	3.38836e+06	4.94857e+06	1.18841e+07	5.64475e+06	4.23054e+07	2.08543e+06	1.11756e+07	1.03523e+07	1.0722e+07
532	322.082	136.075	3.47274e+07	2.40226e+06	4.59551e+07	2.56711e+07	7.76676e+07	1.4975e+07	1.90778e+07	1.80884e+07	3.51568e+07	8.66083e+07	3.58691e+06	1.83517e+07	5.97862e+06	3.41615e+06	2.535e+06	9.47368e+07	5.28368e+06	3.12719e+07	2.18816e+07	2.25499e+06	6.27777e+07	6.3093e+07	6.58822e+07
533	136.095	152.07	2.64382e+08	1.08954e+07	2.56282e+07	1.64055e+07	1.87588e+07	3.19355e+07	3.09093e+07	1.06952e+07	2.14992e+07	3.13722e+07	5.6818e+06	7.57613e+06	3.65561e+06	8.70275e+06	3.66826e+06	1.09694e+07	5.53203e+06	7.1598e+06	1.11696e+07	6.65259e+06	3.11389e+07	2.95056e+07	2.87583e+07
534	418.362	405.208	0	0	183907	446346	2.03511e+06	91271.1	80868.6	10320.4	652401	1.88937e+06	51534.3	525628	18754.7	0	5913.63	687950	14303.8	342665	238401	38302.1	474594	462315	351694
535	195.137	169.085	213373	3.05801e+06	1.2652e+06	1.94571e+06	929833	924833	1.38603e+06	281612	1.78821e+06	0	1.99148e+07	1.96329e+07	1.2443e+07	1.25906e+07	2.27493e+07	2.55103e+07	1.35051e+07	2.2547e+07	2.19165e+07	1.18088e+07	8.61295e+06	7.9027e+06	7.22599e+06
536	197.168	201.09	3.64444e+06	3.64479e+06	1.02138e+07	1.99662e+06	2.15639e+06	3.88787e+06	3.40089e+06	5.71668e+06	2.26263e+06	5.38295e+06	2.10447e+06	1.48646e+06	950283	1.1351e+06	1.7347e+06	1.51944e+06	1.05292e+06	1.26975e+06	1.75527e+06	768606	5.75994e+06	2.89678e+06	3.105e+06
537	235.262	307.042	92921.6	590409	0	0	1.00022e+06	0	0	62879	278832	93813.9	0	0	245939	21712	40131.1	15626	328788	1.36309e+06	604335	1.01394e+06	211855	142460	211171
538	192.512	191.069	2.39578e+07	3.23262e+07	1.90461e+07	3.24771e+07	2.86068e+07	2.21713e+07	4.43875e+07	8.77266e+06	2.2982e+07	2.34755e+07	1.61882e+06	1.2171e+06	759334	941529	1.91357e+06	1.45295e+06	1.0864e+06	1.38038e+06	1.30741e+06	840009	1.59859e+07	1.52786e+07	1.62913e+07
539	408.241	206.101	2.33706e+06	3.79567e+06	1.08018e+07	3.19205e+06	3.55719e+06	4.37771e+06	3.51836e+06	4.89254e+06	4.34962e+06	7.00974e+06	713160	3.52952e+06	3.19903e+06	2.36987e+06	5.24049e+06	1.26557e+06	4.3463e+06	2.3318e+06	3.70778e+06	3.49894e+06	1.46658e+06	1.7507e+06	4.19514e+06
540	391.224	101.071	4.93453e+06	2.80491e+06	4.98268e+06	2.18218e+06	7.97188e+06	1.66507e+06	2.02238e+06	4.1971e+06	7.53288e+06	8.3936e+06	1.844e+06	4.54815e+06	2.15714e+06	1.65242e+06	1.79792e+06	7.51253e+06	2.26048e+06	3.11038e+06	2.18319e+06	2.69955e+06	3.94222e+06	3.9027e+06	4.8724e+06
541	56.3421	136.075	9.46548e+06	280903	7.37729e+06	1.0557e+06	2.70413e+06	2.50941e+06	5.09106e+06	3.78635e+06	8.68204e+06	3.239e+07	1.81549e+06	5.72422e+06	1.16907e+06	651995	744976	3.39955e+06	2.16484e+06	4.35334e+06	6.65711e+06	1.47056e+06	5.27971e+06	5.17206e+06	4.76868e+06
542	350.51	479.113	255338	17022.4	461808	17242.9	40351.1	191872	154296	129069	36968.8	290334	0	0	0	0	0	0	0	0	0	0	49605.9	33649.8	0
543	51.6595	357.131	1.60418e+07	8.36075e+06	5.27269e+06	7.41683e+06	1.09682e+07	1.76734e+07	1.36763e+07	4.11432e+06	4.74926e+06	5.7265e+06	2.09244e+06	407986	1.08317e+06	1.62107e+06	1.22878e+06	570677	1.83831e+06	507415	671448	666322	3.62231e+06	3.6692e+06	3.28081e+06
544	230.76	175.071	5.95264e+06	1.86944e+06	1.88383e+06	1.85195e+06	3.92339e+06	3.9647e+06	1.49371e+06	2.71522e+06	2.02121e+06	1.38589e+06	830841	1.29495e+06	735394	399832	509393	642867	428861	1.27732e+06	1.27686e+06	3.33021e+06	2.00724e+06	1.83023e+06	1.95027e+06
545	102.939	383.205	0	105099	114436	71032	0	557371	0	0	0	0	4.29193e+06	4.82491e+06	3.33915e+06	2.71274e+06	4.01576e+06	4.34479e+06	2.99072e+06	6.33433e+06	5.10747e+06	1.55305e+06	2.41179e+06	2.31426e+06	2.07354e+06
546	150.733	329.1	4.45206e+06	2.85385e+06	8.58229e+06	1.21123e+06	3.94039e+06	4.76847e+06	5.2304e+06	2.75644e+06	2.28266e+06	3.05172e+06	0	0	0	0	51187.8	0	0	0	0	0	2.05806e+06	2.24131e+06	2.01105e+06
547	91.7682	355.116	4.79034e+06	2.70388e+06	3.5714e+06	1.78571e+06	4.28889e+06	7.17378e+06	6.02051e+06	1.33272e+06	581924	2.52689e+06	0	0	0	59888.5	0	0	49227.4	0	0	41302.4	1.80936e+06	1.71259e+06	834404
548	140.809	235.095	2.18895e+06	2.15924e+06	1.9296e+06	1.80315e+06	1.69352e+06	2.32131e+06	2.84698e+06	2.14598e+06	2.21942e+07	1.42442e+07	1.55748e+07	3.89201e+06	3.44212e+06	7.69258e+06	1.32996e+07	8.45136e+06	7.6136e+06	2.06345e+06	9.34353e+06	8.2964e+06	4.21147e+06	4.07696e+06	3.93433e+06
549	322.168	397.221	236975	0	0	0	0	0	0	0	73986.9	0	989387	1.11274e+06	735831	627119	265609	1.23688e+06	523880	1.13681e+06	1.44101e+06	188675	232550	169622	258559
550	198.727	125.059	1.01022e+06	537817	775174	1.22271e+06	485870	1.07405e+06	503224	318156	614318	961075	5.47323e+06	5.60037e+06	4.07186e+06	5.53622e+06	8.77304e+06	7.1165e+06	5.79079e+06	5.90416e+06	4.11556e+06	5.13781e+06	2.42016e+06	2.37655e+06	2.20664e+06
551	153.187	270.314	1.11803e+06	1.10026e+06	1.55221e+06	1.06695e+06	1.14672e+06	1.2858e+06	1.13885e+06	1.46412e+06	1.57101e+06	1.1017e+06	844655	631549	1.03265e+06	970165	926624	1.02435e+06	1.03358e+06	1.09302e+06	1.22021e+06	1.16693e+06	1.24936e+06	1.1226e+06	1.1857e+06
552	261.904	258.107	0	117643	0	102343	962791	0	0	874562	149018	903755	164854	2.01221e+06	1.21787e+06	151234	135770	674999	137811	361336	187989	2.86319e+06	634847	690685	644308
553	384.69	288.165	257943	0	253913	260195	1.93249e+06	36149.1	837612	122178	1.27943e+06	3.8776e+06	0	931561	123344	55025.4	0	2.02442e+06	91029.4	1.36366e+06	381326	46713.5	1.05449e+06	839877	992220
554	117.737	104.07	7.66256e+06	1.23066e+06	1.34522e+07	2.07311e+06	3.33534e+06	3.07404e+06	7.56818e+06	6.39144e+06	7.64564e+06	3.18537e+06	1.32136e+06	1.73828e+06	1.92536e+06	780841	655566	1.64359e+06	1.72166e+06	833815	1.34649e+06	1.02676e+06	4.48724e+06	4.45105e+06	5.0866e+06
555	389.807	128.07	4.18275e+06	2.41355e+06	4.20071e+06	1.90039e+06	3.01113e+06	4.5226e+06	3.14506e+06	5.07991e+06	3.67569e+06	4.09155e+06	1.22961e+06	1.45188e+06	1.02635e+06	904056	3.13614e+06	1.10769e+07	803896	2.28181e+06	2.02889e+06	1.24864e+06	3.37756e+06	2.94005e+06	3.34106e+06
556	383.78	433.15	1.11746e+06	824763	4.08551e+06	796423	1.65145e+06	802537	1.82283e+06	139365	1.23414e+06	1.93565e+06	11361.1	144081	17876.1	0	0	1.98724e+06	14916	430317	0	12112.8	880349	785082	834112
557	299.68	513.156	83110.5	0	558780	2.32152e+06	393186	298352	275565	0	287409	530034	0	0	0	0	0	0	0	0	0	0	480986	558186	160469
558	373.719	288.201	4.92753e+06	0	1.08965e+06	4.50395e+06	1.25904e+07	240196	801208	907884	6.54551e+06	3.05962e+07	249605	2.44816e+07	201645	0	0	1.16243e+07	438301	8.23971e+06	933671	671283	5.92849e+06	5.95759e+06	5.74654e+06
559	125.353	300.288	1.01648e+08	2.46432e+06	1.18042e+07	2.86114e+06	1.91908e+07	7.79851e+06	2.40248e+07	8.99665e+06	3.48936e+07	1.8936e+07	3.15841e+06	1.61829e+07	1.79948e+06	1.17499e+06	935616	9.17667e+06	3.86012e+06	7.12976e+06	3.89703e+06	2.63323e+06	1.16393e+07	1.32264e+07	1.31045e+07
560	86.4937	369.116	2.16262e+07	3.39893e+07	3.75453e+07	1.23101e+07	2.35733e+07	2.64861e+07	1.30851e+07	1.27312e+07	3.89503e+06	5.60803e+07	0	0	0	84827.7	0	0	58991.2	0	0	0	1.12756e+07	9.30721e+06	9.10295e+06
561	451.572	134.044	495698	109375	467348	0	666968	0	70422.8	62463.1	2.48283e+06	2.89824e+06	0	1.12357e+06	0	0	0	978425	0	43593.9	0	0	893632	715621	559483
562	98.4753	178.085	7.55375e+06	4.64925e+06	5.18933e+06	9.50161e+06	6.00647e+06	5.14033e+06	9.07827e+06	5.71973e+06	3.56401e+06	4.89015e+06	1.48161e+07	1.63637e+07	8.25507e+06	1.62706e+07	1.01203e+07	1.53691e+07	1.04648e+07	1.38456e+07	1.92695e+07	1.10734e+07	1.12133e+07	8.60787e+06	8.41493e+06
563	98.9536	193.157	0	0	0	0	0	0	0	0	0	0	2.55238e+07	1.46349e+07	1.49097e+07	1.22087e+06	3.7517e+07	3.60863e+07	2.9712e+07	5.06001e+07	1.86076e+07	1.73624e+07	1.50711e+07	1.36405e+07	1.27648e+07
564	211.047	295.079	3.04668e+06	4.09714e+06	4.32552e+06	2.51413e+06	2.17781e+06	2.72962e+06	2.34136e+06	1.60605e+06	729145	3.49778e+06	0	0	0	0	0	0	0	0	0	0	1.53639e+06	2.01708e+06	1.89761e+06
565	192.307	217.085	3.5141e+06	3.13249e+06	4.05097e+06	1.51091e+06	1.56273e+06	3.59109e+06	2.80242e+06	2.23431e+06	2.14437e+06	2.73262e+06	474081	501873	241809	141564	539733	413291	316322	323191	391584	186353	2.2959e+06	2.65555e+06	2.26338e+06
566	409.368	159.076	7.11596e+06	1.89867e+06	1.71408e+07	1.16772e+07	1.63268e+07	3.12424e+06	4.96546e+06	7.16102e+06	2.44681e+07	6.53826e+07	2.102e+06	6.24211e+06	1.4094e+06	1.88852e+06	621214	2.90264e+07	939397	1.35732e+06	8.58701e+06	2.8422e+06	1.50322e+07	1.38784e+07	1.54901e+07
567	94.3564	199.059	3.8163e+06	985760	4.74673e+06	1.17825e+06	3.55497e+06	4.87355e+06	7.68567e+06	1.34357e+06	2.84483e+06	5.43293e+06	1.12012e+07	4.13629e+06	9.10429e+06	1.33937e+07	6.22698e+06	7.08849e+06	6.71138e+06	3.17701e+06	5.55073e+06	8.89053e+06	9.07169e+06	7.70091e+06	5.47513e+06
568	208.303	703.572	5.17765e+08	2.82648e+08	4.20502e+08	6.29789e+08	7.43577e+08	6.11402e+08	5.25025e+08	5.35808e+08	9.66304e+08	4.1147e+08	2.24962e+08	2.10072e+08	2.03328e+08	6.97584e+07	1.27141e+08	5.41772e+08	2.65829e+08	5.39401e+08	1.35163e+08	1.12177e+08	4.86956e+08	5.0407e+08	4.25997e+08
569	254.017	237.122	1.41815e+07	403237	4.76517e+06	1.19752e+07	3.54205e+07	241059	8.6944e+06	2.52265e+06	1.82982e+07	4.27278e+07	212603	1.93191e+07	375296	160671	115836	1.68702e+07	1.7129e+06	1.3971e+07	420916	406178	1.46288e+07	1.30536e+07	1.08168e+07
570	198.804	139.038	2.76193e+06	3.04736e+06	2.41073e+06	2.15078e+06	1.87959e+06	2.78406e+06	1.5396e+06	3.0852e+06	1.45579e+06	1.55536e+06	1.90045e+06	3.04848e+06	853751	3.73353e+06	4.47767e+06	3.83846e+06	3.05199e+06	2.56719e+06	2.49912e+06	2.82418e+06	1.9819e+06	1.80643e+06	941812
571	552.384	287.242	2.17333e+06	3.66463e+07	810041	6.80588e+06	2.64186e+06	44101.9	1.70031e+07	1.67212e+06	1.96471e+07	889912	4.71326e+07	4.00246e+06	5.55238e+06	1.64765e+07	1.23583e+07	863069	448829	4.88647e+06	658146	3.51502e+06	8.89987e+06	4.20713e+06	2.8873e+06
572	206.834	223.131	465215	517662	463017	414465	1.75158e+06	530704	1.01795e+06	1.10467e+06	640508	767614	1.50469e+06	2.99866e+06	1.1451e+06	1.90603e+06	2.48739e+06	1.56192e+06	1.41182e+06	1.82534e+06	1.92656e+06	1.51775e+06	827883	640708	600106
573	31.743	121.101	2.19856e+06	2.07773e+06	2.5359e+06	670829	2.22679e+06	2.87269e+06	3.42091e+06	2.54697e+06	4.66177e+07	540794	6.45045e+06	7.27812e+06	9.78538e+06	1.45016e+07	1.12982e+07	1.55987e+07	1.05226e+07	6.42618e+06	8.58055e+06	3.44089e+06	1.14782e+07	1.12933e+07	1.15363e+07
574	409.371	249.089	1.16687e+06	81262.4	205314	168556	1.20585e+06	403110	287452	190796	733811	6.23721e+06	13535	1.67547e+06	24791	0	49571.7	224561	89901.5	36362.9	280303	13833.2	721978	650691	630367
575	198.801	293.1	90176.6	0	492099	0	67103.9	61383.3	268144	0	68408.2	63986.7	685781	1.15794e+06	824153	946914	2.01786e+06	1.5448e+06	1.23349e+06	947987	1.06473e+06	1.04093e+06	481583	445009	377517
576	139.726	95.0855	8.38228e+06	3.81794e+06	2.2019e+07	8.12772e+06	7.13474e+06	6.8778e+06	6.31071e+06	7.89396e+06	1.08477e+07	1.47211e+07	1.16202e+07	1.33561e+07	1.32625e+07	1.18401e+07	1.7761e+07	1.75673e+07	1.25691e+07	2.12363e+07	2.56391e+07	1.29694e+07	1.3745e+07	1.36384e+07	1.31068e+07
577	377.471	595.163	336616	167352	737313	183691	291238	370444	314516	297777	373158	356184	0	0	0	0	0	0	0	0	0	0	186240	227180	233654
578	410.211	292.137	1.26596e+06	650427	1.04242e+06	1.03134e+06	351519	891070	1.3446e+06	896104	920264	1.51037e+06	1.09813e+06	763170	639126	1.11148e+06	1.74073e+06	1.66793e+07	1.44974e+06	614484	9.59264e+06	2.14159e+06	2.48832e+06	2.39591e+06	2.46822e+06
579	282.947	188.07	2.47734e+07	1.09172e+07	3.36349e+07	4.24323e+07	1.57797e+08	7.9117e+06	1.77308e+07	2.10978e+07	3.01336e+08	5.43005e+08	6.78699e+06	9.05641e+07	1.11089e+07	2.71765e+06	1.2749e+06	1.36077e+08	1.22673e+07	7.87473e+07	2.16069e+07	8.2306e+06	7.14964e+07	7.50009e+07	6.90571e+07
580	125.57	302.303	1.34896e+09	9.01819e+07	4.80877e+08	9.18294e+07	6.19665e+08	2.77063e+08	9.8764e+08	4.14978e+08	1.90862e+09	8.80512e+08	1.70199e+08	6.60032e+08	8.56067e+07	1.74573e+07	3.23744e+07	5.05851e+08	1.69634e+08	5.10037e+08	1.77184e+08	1.11624e+08	5.47174e+08	5.40551e+08	5.65807e+08
581	149.866	125.096	7.46826e+06	4.49673e+06	1.06789e+07	4.31072e+06	1.11124e+07	3.56885e+06	2.52141e+06	3.69024e+06	2.9183e+06	4.03384e+06	1.80939e+06	2.07968e+06	1.75494e+06	1.37888e+06	1.72177e+06	1.64008e+06	1.46883e+06	4.01983e+06	1.98646e+06	1.75425e+06	3.52354e+06	3.75727e+06	4.04754e+06
582	373.607	244.164	0	20576.7	0	0	0	0	0	0	861192	0	688907	79203.7	23090.1	1.12078e+07	25943.8	497433	113619	0	285797	917738	428071	588112	472204
583	175.666	842.667	4.16272e+06	3.88231e+06	3.13125e+06	2.78845e+06	2.42674e+06	2.35376e+06	2.84545e+06	1.95603e+06	2.25647e+06	2.052e+06	2.35628e+06	1.36009e+06	493863	0	1.17614e+06	1.03387e+06	1.53709e+06	1.59929e+06	760836	54274.4	1.84007e+06	2.24618e+06	2.08115e+06
584	162.243	766.569	2.21831e+06	8.72702e+06	7.62037e+06	1.91628e+07	1.16696e+07	1.34202e+06	1.21904e+07	1.25406e+06	8.25532e+06	2.82746e+07	2.98995e+06	95311.1	945380	764595	2.74067e+06	2.40331e+07	4.15644e+06	1.93883e+07	6.88728e+06	1.91182e+06	8.50865e+06	8.10133e+06	7.47436e+06
585	168.385	337.272	631641	1.00455e+06	2.1218e+06	1.21301e+06	1.78497e+06	49286.9	3.58678e+06	2.47673e+06	739982	698931	1.18655e+06	957288	1.32162e+06	282301	118774	2.09927e+06	592964	827415	2.08629e+06	817347	1.27562e+06	1.43732e+06	1.30296e+06
586	195.216	95.0855	699805	0	217178	586411	249787	0	1.08488e+06	234346	132040	216704	9.36462e+06	1.00883e+07	6.64337e+06	7.01217e+06	1.0529e+07	1.23728e+07	5.91873e+06	1.11412e+07	1.12439e+07	5.39732e+06	2.79359e+06	3.44977e+06	3.35717e+06
587	188.919	506.312	0	0	268240	476627	0	0	115921	0	202909	0	57971.9	164152	123619	94086.4	170722	222931	316142	739418	121841	323872	849289	747246	782549
588	482.277	329.124	763011	62036.2	3.47883e+06	194711	465071	311252	612416	419053	417900	668314	0	0	0	0	0	0	0	0	6613.14	0	573158	589182	592700
589	151.286	389.214	1.98243e+07	5.1797e+06	3.99985e+07	5.75528e+06	1.04602e+07	1.3875e+07	1.1949e+07	1.28624e+07	6.72098e+06	1.5698e+07	684800	486442	90589.1	0	959942	292826	164850	862005	292797	197192	8.68496e+06	8.6054e+06	8.55687e+06
590	284.428	383.204	0	0	0	0	0	0	0	0	0	0	2.39238e+06	2.20406e+06	1.23833e+06	1.24142e+06	1.00232e+06	2.19942e+06	1.19585e+06	3.27712e+06	3.72237e+06	535710	459378	135998	143675
591	356.483	237.089	1.68743e+06	23681.3	953555	1.04834e+06	2.3568e+06	595128	1.25229e+06	253464	1.0052e+06	4.49061e+06	0	1.15776e+06	33327.6	0	0	369272	110072	325754	101066	0	850412	816474	952089
592	265.913	246.169	3.12758e+07	2.14905e+07	1.90094e+08	3.63814e+07	1.38037e+08	6.31945e+08	8.81978e+07	2.0293e+07	5.41538e+08	2.07414e+08	4.17281e+07	4.18564e+08	4.19537e+07	5.29597e+06	8.36055e+06	6.88576e+07	1.45899e+07	9.01688e+07	2.00575e+07	3.06609e+07	1.70445e+08	1.58998e+08	1.57413e+08
593	31.663	119.085	2.09928e+06	1.79774e+06	1.62475e+06	1.52484e+06	1.4362e+06	1.89978e+06	1.61936e+06	2.72676e+06	2.08677e+06	4.18414e+06	1.50744e+07	1.07553e+07	1.12935e+07	1.50188e+07	1.96472e+07	2.0217e+07	9.50853e+06	9.12448e+06	1.2171e+07	1.10427e+07	1.19404e+07	8.28478e+06	1.12183e+07
594	385.221	226.106	270369	0	331256	1.03044e+06	1.5912e+06	118230	845226	138351	742493	6.82923e+06	2.71883e+06	1.79404e+06	1.54739e+06	1.11091e+06	6.35805e+06	6.96955e+06	5.38163e+06	3.47857e+06	7.24971e+06	5.09844e+06	1.84436e+06	1.57819e+06	1.71667e+06
595	223.071	311.256	360534	163698	424305	352446	1.82716e+06	64842.3	5.82178e+06	5.74376e+06	1.28151e+07	1.58197e+06	0	1.12925e+07	1.12469e+06	18098.9	0	754939	833438	1.15431e+06	333882	332168	3.04123e+06	2.83892e+06	2.83673e+06
596	452.937	277.084	183637	94420.8	232620	212258	833872	147204	149582	185961	426820	4.20564e+06	82743.4	2.74919e+06	45803.5	192801	32456.7	604865	76332.4	279348	551765	65760	741190	449601	570839
597	83.7228	153.065	1.21591e+07	5.95582e+06	1.48934e+07	1.24078e+07	4.28381e+07	8.44555e+06	1.07302e+07	8.05991e+06	5.62368e+06	9.287e+06	1.807e+06	2.54791e+06	5.70713e+06	3.38854e+06	1.6371e+06	1.03066e+07	3.42867e+06	4.57301e+06	7.28313e+06	1.63984e+07	1.0442e+07	8.85636e+06	9.36146e+06
598	219.559	480.306	1.04323e+07	4.34748e+07	1.20539e+07	1.42093e+07	4.0215e+07	1.3679e+07	8.56347e+07	5.992e+07	1.4964e+08	5.69915e+07	2.30965e+06	8.55116e+07	2.09344e+07	535265	965972	1.74988e+07	2.09613e+07	1.90223e+07	8.34573e+06	5.04034e+06	3.80362e+07	3.82158e+07	3.49067e+07
599	165.415	613.551	72991.8	0	549736	733071	656929	0	362526	428264	1.2691e+06	1.31105e+06	104514	1.32537e+06	203980	49077.5	336525	795532	271976	1.16826e+06	407599	113785	692694	735519	561189
600	83.0435	111.055	1.47384e+08	7.76656e+06	8.876e+06	1.64154e+07	5.52464e+07	2.15715e+07	2.72836e+07	1.09228e+07	3.71656e+07	5.69226e+07	7.83121e+06	2.17734e+07	1.34304e+07	9.14286e+06	7.42991e+06	4.30921e+07	7.50542e+06	3.82235e+07	2.23596e+07	1.09514e+07	4.22523e+07	4.39714e+07	3.96861e+07
601	152.819	150.127	6.14155e+06	3.28132e+06	4.02414e+06	2.97379e+06	4.92399e+06	5.14024e+06	5.52065e+06	6.52468e+06	3.54899e+06	2.82654e+06	4.56949e+06	1.2527e+08	4.54033e+06	6.29105e+06	3.62449e+06	2.57361e+06	4.56941e+06	5.77741e+06	8.52336e+06	6.27296e+06	4.53645e+06	7.03307e+06	5.56973e+06
602	109.774	443.35	1.41852e+06	3.3913e+06	3.48883e+06	4.569e+06	2.09675e+06	1.43373e+06	2.38397e+06	2.50974e+06	3.31537e+06	1.46073e+06	306607	713188	48091.4	0	57785.4	142797	38527.7	256141	0	0	1.39836e+06	998287	994145
603	201.024	387.142	1.90685e+06	2.44075e+06	2.10975e+06	1.4065e+06	1.00823e+06	2.14273e+06	2.21655e+06	867551	968220	1.21119e+06	135716	0	0	0	0	167958	0	0	0	0	888910	1.01867e+06	902982
604	62.9479	457.343	0	0	0	0	2.21646e+06	0	139947	0	2.83714e+07	1.87836e+06	0	5.1527e+06	0	0	118460	6.41089e+06	1.23883e+06	3.4781e+06	423044	0	1.69269e+06	1.01208e+06	1.89741e+06
605	434.226	465.177	1.92299e+06	507771	7.43026e+06	1.18282e+06	2.45182e+06	1.24269e+06	2.76799e+06	995380	570100	1.37718e+06	0	18138.4	0	0	0	25482.3	0	18432.8	0	0	1.56278e+06	1.43369e+06	1.62559e+06
606	413.884	170.091	8.62833e+06	9.9084e+06	1.74695e+07	7.00065e+06	7.60508e+07	683114	1.05595e+06	2.32739e+06	5.38099e+06	3.13544e+07	914517	6.908e+06	919414	2.5048e+06	598018	1.36916e+07	500964	5.94771e+06	1.83292e+06	759312	1.5822e+07	7.94949e+06	8.0159e+06
607	200.113	428.372	6.25291e+07	1.31885e+07	2.94702e+07	2.69337e+06	3.06007e+07	1.72822e+07	2.24211e+07	1.42528e+07	1.45522e+08	1.19879e+08	1.41986e+07	5.44151e+07	7.56533e+06	1.52425e+07	2.1267e+07	8.37416e+06	1.51708e+07	3.56293e+07	9.59859e+06	3.36845e+07	3.59843e+07	3.2876e+07	3.25263e+07
608	126.06	359.146	1.88228e+06	6.33075e+06	1.0137e+06	6.03752e+06	3.43534e+06	5.71537e+06	5.03905e+06	2.23228e+06	2.38571e+06	830689	0	0	146838	1.94902e+06	189235	0	70308.5	0	312445	276392	1.27587e+06	1.81664e+06	1.76235e+06
609	337.49	521.197	0	0	0	0	0	0	0	0	0	0	120753	386357	168466	98995.7	53574.7	115419	160844	108305	303173	153753	86555.9	51198.1	27390.7
610	174.328	535.506	214116	273792	1.03992e+06	515024	4.27583e+06	78928	516681	3.26988e+06	1.26943e+07	6.15101e+06	1.08088e+06	1.12764e+07	1.12702e+06	550216	191344	1.54215e+06	575499	1.61148e+06	532276	1.89696e+06	3.32576e+06	3.98389e+06	3.06281e+06
611	340.308	262.067	290127	120534	992153	585798	131420	1.20215e+06	641538	2.32756e+06	2.20501e+06	1.53638e+06	55924.1	527716	32396.6	0	46665.9	402058	59176.4	146563	696966	99069.6	1.29568e+06	1.30167e+06	1.18094e+06
612	438.883	262.149	622336	536591	871725	476004	853256	463558	790486	770085	5.34838e+06	5.11649e+06	363180	2.42379e+07	157067	121812	302447	2.0974e+06	259444	4.03534e+06	2.48097e+06	270887	2.14739e+06	2.73004e+06	1.94889e+06
613	98.221	192.076	5.6716e+06	1.5265e+06	4.43471e+06	5.20145e+06	1.30009e+06	1.65036e+06	728439	1.10066e+07	884211	428809	6.89243e+06	6.04921e+06	8.32148e+06	1.15631e+07	1.91642e+07	2.08994e+07	7.52225e+06	8.22587e+06	1.88287e+07	9.09315e+06	7.74046e+06	6.9983e+06	6.6914e+06
614	151.57	173.106	1.06303e+06	1.54887e+06	2.60779e+07	669773	1.22259e+06	2.03199e+06	4.37134e+07	1.62698e+06	2.7718e+06	1.24465e+06	3.5202e+06	966516	1.44024e+06	693459	3.84879e+06	2.965e+06	2.24833e+06	713480	2.34465e+06	2.66503e+06	3.85351e+06	3.33306e+06	4.12236e+06
615	303.243	421.254	139507	25009.6	682446	47190.3	4.00335e+06	0	0	194893	3.08059e+06	1.71255e+06	266164	1.74368e+06	233121	0	0	1.09827e+06	133972	2.32634e+06	560836	58037.5	945743	802474	710738
616	217.609	274.114	1.18747e+06	446709	1.52425e+06	442395	563652	663653	423596	613215	336602	503634	0	0	0	27437	481623	914968	24766.8	1.00931e+06	434022	260054	481994	325417	341865
617	117.263	253.105	8.26339e+06	5.10428e+06	9.50931e+06	3.96743e+06	7.10393e+06	9.19624e+06	8.03214e+06	5.81558e+06	4.07748e+06	7.57253e+06	1.38428e+06	896703	795885	900212	1.3706e+06	1.42958e+06	693672	1.16881e+06	1.52724e+06	865864	3.59457e+06	3.95462e+06	3.72543e+06
618	143.884	740.46	9.19624e+07	6.38439e+07	6.28667e+07	4.59888e+07	6.24656e+07	7.8651e+07	7.27484e+07	9.25014e+07	3.87322e+07	2.93617e+07	2.12029e+07	2.80582e+07	2.38775e+07	2.96021e+07	1.27725e+07	1.25155e+07	1.6459e+07	1.1992e+07	2.94095e+07	2.35229e+07	4.63213e+07	4.42392e+07	4.75938e+07
619	308.235	781.247	211578	301464	99223.6	311525	185889	424643	271348	292412	171623	0	134444	27397.4	0	20970.4	0	114604	0	20782.2	0	117170	163826	240765	134422
620	319.397	168.064	1.85318e+07	1.23174e+07	1.00647e+07	7.56508e+06	5.3273e+06	2.00731e+07	2.5937e+07	8.22218e+06	3.53881e+06	4.39352e+06	3.54158e+07	2.42155e+07	1.64506e+07	2.83019e+07	5.11729e+07	4.96481e+07	3.21945e+07	1.14787e+07	1.61134e+07	3.6214e+07	1.94832e+07	1.98973e+07	1.7939e+07
621	272.041	122.081	6.22326e+06	1.1008e+07	5.35133e+06	6.08377e+06	2.55208e+06	5.35923e+06	6.87318e+06	3.02868e+06	2.00833e+06	1.39009e+06	8.73355e+06	1.04375e+06	4.78796e+06	4.93333e+06	4.89985e+06	2.96673e+06	6.20196e+06	4.20229e+06	2.08352e+06	2.32323e+06	3.89503e+06	3.66909e+06	3.82339e+06
622	103.26	639.445	0	0	0	0	0	0	0	0	0	0	737124	738761	783557	563373	189093	951974	163096	1.02207e+06	1.24735e+06	268040	523870	454664	346125
623	221.747	333.132	4.62188e+06	647893	4.80876e+06	1.34935e+06	1.76706e+06	2.80631e+06	1.73586e+06	2.88057e+06	1.36978e+06	1.84286e+06	0	0	13286.7	0	18562.7	0	0	0	74585.1	74992	1.47624e+06	1.43808e+06	1.33719e+06
624	99.926	411.36	451480	1.30196e+06	993876	1.54033e+06	738188	739883	473933	1.12026e+06	933753	974846	4.0866e+06	1.12652e+06	2.5479e+06	5.40909e+06	2.50445e+06	1.65095e+06	2.12803e+06	1.87162e+06	2.19287e+06	2.68634e+06	1.81421e+06	1.95945e+06	1.6669e+06
625	59.9584	130.086	3.63429e+07	1.75452e+07	1.21466e+07	1.51352e+07	1.83749e+07	2.47363e+07	1.97163e+07	3.46064e+07	2.00206e+07	1.94841e+07	2.08884e+07	4.18498e+07	2.53066e+07	4.64634e+07	2.22882e+07	1.97714e+07	2.3104e+07	1.63294e+07	3.94214e+07	2.55609e+07	2.56668e+07	2.20682e+07	2.53274e+07
626	35.316	191.142	2.42517e+06	3.66189e+06	2.26259e+06	1.54936e+06	2.35203e+06	2.99356e+06	3.24506e+06	1.88971e+06	1.80143e+06	1.95852e+06	5.86084e+06	5.111e+06	6.96938e+06	1.03689e+07	1.18635e+07	4.17865e+06	4.19481e+06	3.26084e+06	4.95905e+06	6.06681e+06	90747.6	3.23463e+06	3.12612e+06
627	103.89	99.0439	1.23473e+07	434166	6.06346e+06	0	93244.4	182978	1.19747e+06	0	3.63025e+06	2.79518e+06	1.01528e+06	1.61191e+06	891612	452893	753399	1.29961e+06	503471	1.51079e+06	1.70666e+06	459532	2.86376e+06	2.41267e+06	2.13702e+06
628	104.157	193.085	7.08045e+06	2.77755e+06	6.41399e+06	5.34505e+06	5.78092e+06	5.63592e+06	6.81571e+06	4.3855e+06	3.03015e+06	3.50238e+06	291220	291944	1.73942e+06	1.9905e+06	0	385974	427896	547220	1.99237e+06	875948	1.96109e+06	2.65708e+06	1.61617e+06
629	134.342	511.271	224773	94829.5	64595	0	48630.9	67685.6	149477	78941.5	0	102794	281588	1.8161e+06	1.41972e+06	3.38556e+06	1.34851e+06	325370	900097	207279	2.47751e+06	3.06768e+06	311273	358653	72625
630	87.1345	138.091	3.50545e+07	4.22102e+06	1.13815e+07	5.60576e+06	2.02699e+06	4.10121e+06	1.01052e+07	5.53659e+06	3.41502e+06	7.26326e+06	7.83588e+06	1.40163e+07	5.00328e+06	1.20884e+07	4.77612e+06	6.53492e+06	8.0875e+06	3.17166e+06	1.87912e+07	1.46822e+07	9.95044e+06	1.03143e+07	1.03653e+07
631	121.26	385.11	2.79484e+06	1.65302e+06	1.84872e+06	744908	804198	2.09246e+06	1.04131e+06	1.5673e+06	579563	1.48311e+06	0	0	37958.6	0	0	0	43828.5	0	0	39799	266974	788596	645307
632	199.744	185.08	1.54823e+07	5.60942e+06	1.82462e+07	5.24831e+06	4.75307e+06	5.79699e+06	6.58226e+06	8.6686e+06	1.10758e+07	1.54243e+07	1.04118e+08	1.4955e+08	1.09902e+08	1.53359e+08	2.36529e+08	1.77881e+08	1.64503e+08	1.54516e+08	1.35591e+08	1.46008e+08	6.63036e+07	6.85296e+07	6.00297e+07
633	265.499	579.202	495919	986555	1.0396e+06	612785	1.0818e+06	1.13744e+06	1.54518e+06	782350	759976	267554	13276.5	0	0	0	0	61545.9	45654.4	22794.1	33583.7	0	399412	618196	449443
634	154.247	211.059	7.10016e+06	6.11334e+06	7.6483e+06	5.49014e+06	8.11165e+06	5.92857e+06	7.97426e+06	4.00892e+06	3.2964e+06	1.18132e+07	1.05879e+06	1.13782e+06	1.0445e+06	1.2754e+06	1.07851e+06	1.54352e+06	690013	945692	1.62473e+06	1.21016e+06	2.91151e+06	4.03452e+06	4.14276e+06
635	130.907	227.09	4.90128e+06	2.03683e+06	3.86275e+06	5.21054e+06	4.27017e+06	3.40989e+06	4.39114e+06	2.77207e+06	3.06572e+06	4.29636e+06	5.07667e+06	7.50901e+06	5.61299e+06	5.71191e+06	4.30489e+06	6.1329e+06	3.11164e+06	6.32284e+06	8.70267e+06	3.75738e+06	1.42992e+06	2.66778e+06	2.88458e+06
636	272.565	187.107	6.38484e+06	6.2575e+06	302485	2.38443e+06	3.34996e+06	1.57004e+06	3.40714e+06	318280	1.99752e+06	4.52696e+06	6.3777e+06	778675	2.04579e+06	3.71274e+06	89344.4	1.1129e+06	1.27062e+07	633747	1.17734e+06	2.25045e+06	2.85072e+06	2.81601e+06	2.45727e+06
637	447.226	247.127	282953	411399	457104	1.19931e+06	277738	552941	196515	330938	806851	2.55989e+06	114236	669606	67357	204034	94605.3	1.62733e+06	63740.5	168053	248203	169412	370048	398157	394475
638	322.067	147.043	5.96149e+06	1.50588e+06	7.59456e+06	3.70122e+06	1.29003e+07	2.43347e+06	2.8796e+06	3.28562e+06	5.46538e+06	1.42798e+07	1.71962e+06	2.61368e+06	1.88731e+06	1.72667e+06	1.59523e+06	1.57125e+07	2.00886e+06	4.9481e+06	4.33994e+06	2.36076e+06	1.0098e+07	9.8802e+06	1.05412e+07
639	243.118	529.187	0	0	0	0	0	0	0	287687	0	0	1.02746e+06	1.37059e+06	616022	220579	2.5715e+06	968658	1.49264e+06	633020	405210	1.36765e+06	249999	324342	313453
640	38.5707	180.101	9.21545e+06	6.36771e+06	3.3721e+06	1.8849e+06	2.61492e+06	1.68199e+06	1.09514e+07	4.63356e+06	1.81523e+06	1.14057e+07	4.12015e+06	2.26673e+06	3.27403e+06	3.86407e+06	3.5989e+06	5.74921e+06	1.97531e+06	3.72644e+06	5.11029e+06	3.89668e+06	3.58597e+06	3.59878e+06	3.68707e+06
641	191.082	153.09	8.79305e+06	4.98305e+06	7.57344e+06	5.13351e+06	4.13477e+06	8.8119e+06	6.44562e+06	6.71677e+06	4.20579e+06	1.09442e+07	708621	2.06249e+06	2.23642e+06	2.67252e+06	4.896e+06	1.49187e+06	1.95139e+06	1.3971e+06	555419	2.65752e+06	4.98079e+06	5.58091e+06	4.40676e+06
642	376.676	148.096	7.15589e+07	2.0199e+06	7.95377e+06	1.57201e+06	1.25335e+06	3.02712e+06	1.13751e+07	3.6565e+06	1.18294e+07	1.737e+06	1.77385e+06	252921	1.0914e+06	970832	3.42923e+06	2.55033e+06	2.48572e+06	1.86379e+06	3.85974e+06	1.96377e+06	7.97278e+06	7.71063e+06	7.94387e+06
643	239.685	254.137	243454	257319	301932	954387	133228	184955	76136.6	123208	200821	133655	1.3251e+06	978289	714214	0	1.61643e+06	2.1728e+06	1.23595e+06	1.58927e+06	2.01942e+06	1.13877e+06	787773	908949	746739
644	176.971	201.111	220323	255992	193478	67832.8	110988	605826	0	81908.1	0	0	6.47133e+06	5.51132e+06	9.67109e+06	1.47429e+07	6.15907e+06	2.94673e+06	6.81342e+06	2.82643e+06	1.48504e+07	8.87883e+06	3.68263e+06	4.64967e+06	3.20507e+06
645	295.938	292.137	424246	0	1.30774e+06	28691.1	296893	1.10517e+06	350834	1.22808e+06	3.08929e+06	0	784758	2.24581e+06	379706	570486	1.65755e+06	3.46486e+06	1.71477e+06	4.7105e+06	1.15346e+07	2.13301e+06	1.51589e+06	634046	1.46837e+06
646	192.188	248.033	1.23689e+07	3.19568e+06	1.07989e+07	6.43964e+06	4.92369e+06	1.67792e+07	9.00755e+06	6.27803e+06	8.17638e+06	6.5041e+06	1.69957e+06	0	66907.6	153041	263921	156934	321296	93073.6	602516	138839	2.30311e+06	8.07217e+06	1.47511e+06
647	156.425	179.069	1.12993e+07	6.21004e+06	2.22422e+07	7.7459e+06	7.39629e+06	1.61534e+07	8.18549e+06	1.08523e+07	6.9309e+06	7.04807e+06	655608	864031	275773	812585	891340	899329	267941	585516	201196	479382	7.93083e+06	5.61019e+06	6.66138e+06
648	373.707	351.125	1.44743e+06	243112	1.9541e+06	801946	323927	200677	625705	241994	420028	1.19111e+06	21391.2	0	27561.1	104661	460420	0	57988.6	15669.4	0	0	339946	383514	505923
649	72.2252	134.08	4.66567e+07	1.72295e+07	1.26747e+08	1.10481e+08	1.36201e+08	4.00136e+07	9.74427e+07	3.49031e+07	2.25098e+08	4.27056e+08	4.10024e+07	1.35849e+08	7.7205e+07	7.85945e+06	7.13805e+07	9.98451e+07	7.89481e+07	1.5888e+07	1.55485e+08	1.43346e+07	1.03781e+08	1.02409e+08	1.05829e+08
650	180.101	197.08	2.42547e+07	7.41793e+07	7.53817e+07	7.47667e+07	3.2811e+07	7.28232e+07	7.59993e+07	3.33525e+07	3.2426e+07	4.21904e+07	1.2002e+06	1.22598e+06	969980	1.81412e+06	3.98341e+06	997804	1.10152e+06	2.25774e+06	1.21282e+06	1.63505e+06	3.05354e+07	3.06305e+07	3.03205e+07
651	142.448	183.064	1.05716e+08	1.36098e+08	8.8617e+07	1.0445e+08	8.56715e+07	1.58574e+08	1.5066e+08	1.10983e+08	1.16389e+08	9.6831e+07	3.41338e+06	5.18089e+06	2.69588e+06	1.47655e+06	3.08728e+06	4.26461e+06	812140	3.29975e+06	3.80274e+06	1.81845e+06	6.85716e+07	6.81846e+07	5.79036e+07
652	320.248	219.096	1.10385e+06	868593	9.38033e+06	3.19591e+06	2.26839e+07	2.11216e+06	1.22434e+07	6.56853e+06	1.70552e+06	363143	5.43829e+06	275351	538877	290784	27085.5	1.2392e+07	73663.9	6.68177e+06	5.68642e+06	0	6.65214e+06	7.67863e+06	4.97286e+06
653	35.9819	143.106	486531	347996	379446	251860	219624	480506	271556	386521	128490	175201	2.51645e+07	2.06047e+07	2.2513e+07	3.84222e+07	3.59853e+07	2.55012e+07	2.3481e+07	2.11691e+07	3.0801e+07	2.32543e+07	1.09877e+07	1.14226e+07	1.10163e+07
654	197.683	279.169	1.461e+07	1.08172e+06	7.78985e+06	2.39536e+07	4.43935e+07	1.65e+06	3.67823e+06	1.47318e+06	2.27893e+07	3.60066e+07	176566	0	35043	63955.1	0	4.07406e+07	841021	4.03267e+06	8.41537e+06	0	1.21784e+07	1.24139e+07	1.13395e+07
655	52.7638	170.117	7.01823e+06	4.07973e+06	7.0499e+06	6.02041e+06	3.5268e+06	7.68992e+06	6.35955e+06	6.75923e+06	2.60746e+06	6.05506e+06	2.7728e+06	4.36565e+06	1.85394e+06	3.97795e+06	3.4252e+06	1.65976e+06	2.3935e+06	3.73986e+06	3.1902e+06	2.87539e+06	3.04957e+06	4.13232e+06	4.25891e+06
656	29.6793	295.225	3.11165e+06	2.51736e+06	2.91469e+06	1.73228e+06	1.63575e+06	2.10326e+06	2.60052e+06	4.35348e+06	1.1713e+06	1.81547e+06	7.27996e+06	4.96033e+06	5.57639e+06	8.37085e+06	7.79963e+06	8.39006e+06	6.42514e+06	5.85137e+06	8.23993e+06	4.89986e+06	5.19754e+06	485037	4.08714e+06
657	154.772	329.155	0	0	0	0	0	0	0	0	0	0	832005	2.62186e+06	2.17658e+06	1.88834e+06	1.47562e+06	945163	1.4104e+06	786228	2.34453e+06	1.84828e+06	617078	800713	306129
658	199.389	263.09	1.34927e+06	338238	2.52544e+06	158396	0	217282	213878	705527	526873	738524	3.65844e+06	5.11379e+06	3.9882e+06	5.21199e+06	8.5786e+06	6.15014e+06	5.11908e+06	5.05487e+06	4.22352e+06	4.77269e+06	2.40253e+06	2.76037e+06	2.07245e+06
659	247.638	202.142	1.94893e+06	335160	1.39852e+06	488007	318192	607002	332550	527210	1.03944e+06	232401	2.3249e+06	2.05985e+06	2.16333e+06	711725	2.9485e+06	6.22615e+06	2.20692e+06	2.01479e+06	6.65798e+06	1.48193e+06	1.48986e+06	1.64381e+06	1.82732e+06
660	242.415	314.09	755610	447458	1.54806e+06	1.08117e+06	624617	2.19266e+06	1.9933e+06	1.88833e+06	681857	715578	184744	145225	74109.2	190733	28678.6	91757.8	225845	34782.4	54300.8	796868	796145	797328	638301
661	117.078	235.095	1.10546e+07	7.40204e+06	1.33113e+07	5.67351e+06	9.15541e+06	1.30643e+07	9.88753e+06	7.7709e+06	5.75609e+06	1.07206e+07	1.31567e+06	931475	594593	404448	1.06985e+06	1.37915e+06	379340	1.1301e+06	906803	542010	4.56108e+06	4.88687e+06	4.53872e+06
662	217.59	445.365	1.15555e+06	1.85464e+06	1.2733e+06	989747	967290	517854	696320	1.32713e+06	2.63423e+06	991359	483123	198004	23463.8	103347	147881	37366.5	195472	78469.7	90934.7	343748	1.57108e+06	1.35722e+06	1.21981e+06
663	175.425	295.225	169619	1.24682e+06	173902	815572	335173	3.42673e+06	581891	1.32123e+06	0	0	1.44254e+06	1.2875e+06	2.01966e+06	4.74817e+06	1.82021e+06	625395	1.96125e+06	771997	2.81808e+06	2.11417e+06	1.03106e+06	810888	828465
664	233.005	389.307	703040	271405	354571	44395.9	145442	35541.9	544823	422648	4.87621e+06	1.98376e+06	0	896228	0	14095.6	19449.7	29061.9	35665.6	77316.7	0	35299.4	523678	447526	477410
665	110.322	556.527	5.02162e+06	610382	2.95826e+06	2.84992e+06	6.27425e+06	2.75553e+06	4.34763e+06	4.59349e+06	6.10278e+06	3.29339e+06	1.74581e+06	2.67187e+06	1.49618e+06	51722.6	79776.7	4.28361e+06	1.60054e+06	3.1335e+06	2.2399e+06	2.32409e+06	3.16974e+06	2.79056e+06	3.03574e+06
666	316.61	269.159	2.32734e+07	546727	1.69687e+06	1.42696e+07	1.80275e+07	2.08946e+06	4.7739e+06	2.46826e+06	9.215e+06	4.14816e+07	1.59404e+06	1.90739e+07	433362	113327	167956	4.87982e+07	1.23672e+06	1.29003e+07	2.2588e+06	1.59195e+06	1.159e+07	1.14765e+07	1.10544e+07
667	228.176	220.107	46492.8	63582.8	36748.4	89991.5	0	19512.7	0	55668.6	135122	90464.4	183011	872426	151741	522571	337562	692742	219534	1.11579e+06	540607	220973	422331	418410	304665
668	110.116	461.36	2.31305e+06	4.30687e+06	4.31261e+06	6.37978e+06	2.72459e+06	734906	3.4043e+06	3.17601e+06	3.92655e+06	2.00268e+06	107636	0	0	0	0	0	80120.1	77768.5	0	0	1.29543e+06	1.64608e+06	1.09097e+06
669	33.7356	167.106	4.52493e+06	3.33611e+06	1.82264e+06	3.67585e+06	3.49738e+06	4.20691e+06	3.84877e+06	612005	1.42495e+06	1.71866e+06	1.23562e+07	1.29991e+07	9.63449e+06	2.61626e+07	2.14376e+07	1.50181e+07	8.68551e+06	9.40487e+06	1.30797e+07	8.03841e+06	6.20078e+06	6.53513e+06	5.74681e+06
670	218.882	303.121	5.555e+06	2.11384e+06	6.33022e+06	2.28311e+06	3.04559e+06	3.54564e+06	3.02505e+06	3.12454e+06	2.08091e+06	2.66409e+06	0	0	0	0	28045	0	0	0	0	0	2.09829e+06	2.05006e+06	2.08984e+06
671	48.5731	760.573	1.5988e+07	1.91144e+07	1.83392e+07	2.01949e+07	1.43099e+07	1.8249e+07	1.86907e+07	2.047e+07	2.97771e+07	1.60619e+07	4.00144e+06	829793	514075	1.02584e+06	6.07082e+06	3.24053e+06	7.08361e+06	8.2728e+06	744579	749118	1.01871e+07	1.04964e+07	1.02478e+07
672	49.3303	722.502	2.31165e+06	3.86555e+06	2.61659e+06	3.86521e+06	3.09399e+06	1.54138e+06	3.31137e+06	4.58287e+06	3.99505e+08	2.19433e+08	547741	504530	296600	517485	1.07063e+06	681775	1.27505e+06	1.15671e+06	507386	541419	2.87857e+07	3.13383e+07	2.82285e+07
673	427.697	222.132	2.40032e+07	6.98157e+06	6.52612e+07	1.06767e+07	2.03267e+07	9.80612e+06	1.58601e+07	1.70131e+07	2.00838e+07	3.79538e+07	1.64153e+06	2.82917e+06	2.68693e+06	2.75001e+06	4.96889e+06	1.77997e+06	2.39246e+06	3.00844e+06	2.90574e+06	3.12136e+06	1.53175e+07	1.36056e+07	1.58273e+07
674	283.856	294.143	896339	35924.3	261559	2.64049e+06	5.98981e+06	175350	477757	418085	9.13492e+06	1.80393e+07	55262	4.73303e+06	81804.1	0	0	5.14102e+06	218461	2.72308e+06	306234	0	1.42289e+06	1.96021e+06	1.62066e+06
675	98.638	248.111	3.43233e+06	1.32982e+06	1.93177e+06	1.48969e+06	1.8919e+06	3.08725e+06	2.51448e+06	1.63845e+06	7.26689e+06	1.99322e+06	264450	175570	76249.3	0	1.88642e+06	1.78898e+06	1.07227e+06	130791	4.10299e+06	87424.2	1.12434e+07	1.16369e+07	1.11498e+07
676	132.53	346.308	1.93458e+06	1.60375e+06	2.49286e+06	1.46662e+06	1.13161e+06	1.82293e+06	2.30552e+06	2.25843e+06	55787.9	0	0	0	0	0	0	0	0	0	0	0	693587	607088	707378
677	186.989	858.521	1.26833e+08	7.14721e+07	1.03957e+08	6.39168e+07	1.00715e+08	9.67383e+07	9.83248e+07	9.87569e+07	141616	559619	1.61373e+07	4.04893e+07	1.46688e+07	1.33072e+07	6.94251e+06	1.71611e+07	8.82849e+06	1.1679e+07	2.8217e+07	2.77591e+07	6.10363e+07	6.22536e+07	6.02984e+07
678	464.078	275.17	231105	0	11793.5	104706	605380	0	0	0	5.40564e+06	5.50929e+06	64174.1	2.02007e+07	136381	1.67316e+06	0	2.73111e+06	58369.9	891484	127850	147426	2.05176e+06	1.93374e+06	1.66466e+06
679	132.519	299.09	1.37544e+06	1.7315e+06	2.40999e+06	1.477e+06	1.27415e+06	3.71867e+06	3.48014e+06	2.02571e+06	684495	400166	480112	692509	366129	445360	208062	350583	0	404043	534572	777639	1.01942e+06	1.37707e+06	1.0157e+06
680	167.245	814.626	7.30662e+06	5.90829e+06	1.52434e+07	2.16873e+07	2.86595e+07	7.22878e+06	4.6321e+06	1.33312e+07	5.42977e+07	2.82137e+07	5.31359e+06	1.51529e+07	8.21159e+06	2.99705e+06	7.19085e+06	1.81986e+07	1.56525e+07	1.77298e+07	8.44724e+06	5.3622e+06	1.83658e+07	1.73482e+07	1.68158e+06
681	58.1563	207.064	1.92197e+07	1.32147e+07	2.15764e+07	1.49174e+07	1.95216e+07	2.12179e+07	1.71288e+07	1.72754e+07	1.77033e+07	2.03184e+07	6.85816e+06	4.88726e+06	6.64373e+06	6.61833e+06	9.64944e+06	8.05458e+06	5.6468e+06	6.77885e+06	5.60636e+06	5.77974e+06	1.33189e+07	9.73982e+06	1.42207e+07
682	482.486	262.127	1.32392e+06	884630	1.6702e+06	1.09676e+06	831815	764582	1.02473e+06	1.04847e+06	1.76648e+06	1.58154e+06	781833	377700	233709	205283	484722	2.58119e+06	450305	584611	3.4254e+06	384509	3.68357e+06	3.02937e+06	2.50201e+06
683	398.495	376.158	1.2277e+06	991725	1.37031e+07	401448	1.34958e+06	2.20038e+06	2.20424e+06	2.98307e+06	5.02264e+06	6.1127e+06	0	0	0	0	0	71515.1	29170.4	17153.1	0	0	2.68428e+06	2.63903e+06	2.43427e+06
684	266.552	294.117	5.44843e+06	458752	3.71689e+06	5.10041e+06	664457	2.20333e+06	3.88033e+06	1.14035e+06	3.87082e+06	1.38476e+06	65184.8	704939	248582	40575.9	1.69791e+06	828719	552239	853537	168908	343985	1.80458e+06	1.81716e+06	1.86836e+06
685	318.78	151.038	5.43482e+06	1.80683e+06	2.393e+06	1.8328e+06	1.02117e+06	919209	2.51207e+06	3.15305e+06	240094	6.83007e+06	306100	0	838747	2.93052e+06	5.02146e+06	0	589467	0	1.18817e+06	402037	1.02052e+06	1.02721e+06	905387
686	371.889	193.08	57073.8	0	308458	190112	608976	0	415547	369736	1.47585e+06	2.02481e+06	0	4.4329e+06	0	0	9403.84	818940	0	844502	121744	0	742057	774077	678993
687	52.1082	191.09	3.57045e+06	4.56522e+06	4.19564e+06	5.36253e+06	4.25516e+06	4.87301e+06	3.94744e+06	3.0433e+06	3.54503e+06	2.70726e+06	3.15231e+06	6.81782e+06	4.35603e+06	5.0796e+06	5.14525e+06	3.87297e+06	3.06737e+06	3.34915e+06	6.27409e+06	3.55645e+06	3.4426e+06	3.06804e+06	4.1201e+06
688	532.989	133.097	468707	447933	403956	77477.6	564044	162619	403436	596121	1.58481e+07	1.03398e+06	348528	6.33766e+06	203227	253250	358811	1.05905e+07	186247	435004	296663	319945	1.51605e+06	2.03282e+06	1.08817e+06
689	102.124	413.376	1.94146e+06	2.29937e+06	1.85664e+06	2.74493e+06	1.71511e+06	1.43834e+06	1.41639e+06	3.12096e+06	717714	1.36467e+06	348363	0	0	0	96046	0	0	220588	0	0	1.04204e+06	643809	920184
690	101.197	293.209	197299	2.26189e+06	1.36905e+06	1.97239e+06	808229	3.94924e+06	2.00052e+06	1.8396e+06	165759	123018	4.12273e+06	5.99198e+06	6.52398e+06	8.91925e+06	6.84655e+06	5.43707e+06	5.26313e+06	5.10768e+06	7.90909e+06	5.21793e+06	4.99522e+06	5.15034e+06	3.96379e+06
691	354.791	132.101	4.03511e+07	4.31902e+07	2.0644e+07	4.94432e+07	2.05695e+08	4.76643e+06	2.50098e+07	7.49339e+07	2.58308e+08	4.27749e+08	3.44528e+07	1.49087e+08	2.97318e+07	9.20942e+06	3.63344e+07	1.25782e+08	4.05909e+07	1.13351e+08	6.6178e+07	1.80997e+07	9.87234e+07	1.58233e+07	1.23963e+08
692	222.17	363.142	2.65299e+06	444823	2.51304e+06	819109	750725	1.24995e+06	1.26796e+06	1.64405e+06	949759	1.1729e+06	852498	668142	186744	0	1.82781e+06	136060	118034	876977	575913	273233	874920	989831	903792
693	258.449	824.48	0	0	0	73818.7	0	0	0	15670.7	0	0	421947	1.05582e+06	484310	483775	321244	365617	434947	267138	620672	731010	170351	461107	394114
694	36.8912	848.626	4.00697e+06	3.97141e+06	3.93179e+06	4.34613e+06	2.55417e+06	1.58337e+06	4.27315e+06	4.47661e+06	4.92984e+06	4.55203e+06	859017	0	0	0	740190	55909.6	172804	454034	0	42440.2	2.38896e+06	1.92576e+06	2.89085e+06
695	372.863	247.139	3.13903e+06	61249.1	2.17871e+06	720253	1.73304e+06	1.9964e+06	3.6474e+06	4.22107e+06	3.4571e+06	4.47542e+06	1.65624e+06	1.22844e+06	1.14262e+06	0	14202	1.55951e+07	326131	2.19822e+06	1.1642e+06	176498	2.033e+06	1.87623e+06	2.30914e+06
696	58.7298	481.35	0	0	0	0	0	0	0	0	0	0	1.66138e+06	1.24353e+06	1.43039e+06	669454	1.13602e+06	1.48695e+06	757130	2.64841e+06	2.78396e+06	867248	849146	1.20517e+06	924956
697	29.1499	577.516	502677	380773	601298	614452	938182	694432	317992	835738	2.28263e+06	1.72904e+06	281494	756397	208411	456676	352380	484012	409557	479966	542608	132345	511813	487450	405359
698	33.5273	325.272	222366	445680	352987	268331	447543	456946	330086	317316	152512	159895	1.51107e+06	1.20249e+07	1.27696e+07	1.23413e+07	3.66961e+06	2.4016e+06	6.53241e+06	2.79965e+06	9.68386e+06	1.1505e+07	4.14675e+06	3.82362e+06	4.25625e+06
699	214.119	247.131	176812	0	831764	227152	0	50097.2	0	0	0	0	1.38092e+06	1.30747e+06	1.16676e+06	617625	1.57194e+06	1.1568e+06	1.00396e+06	1.9567e+06	1.62531e+06	1.60959e+06	609555	501324	455938
700	322.909	332.132	951343	910166	5.20381e+06	1.7664e+06	570142	346108	2.22546e+06	2.00705e+06	1.00329e+06	71565	349640	336008	212395	233219	403563	0	198315	145431	0	29145.8	1.08014e+06	1.1521e+06	1.22041e+06
701	127.33	373.126	1.08452e+07	1.79394e+07	2.16345e+07	5.84515e+06	1.18782e+07	2.85124e+07	1.2871e+07	6.34069e+06	8.35966e+06	8.0527e+06	0	0	0	0	0	0	0	0	0	0	5.81273e+06	5.20252e+06	6.26847e+06
702	38.7075	127.075	743722	71395.3	54397.8	0	154082	201104	229078	98872.1	157994	203230	7.61854e+06	5.15195e+06	3.9497e+06	6.1287e+06	6.30489e+06	6.68363e+06	3.70868e+06	5.94593e+06	5.7738e+06	4.94953e+06	2.73978e+06	2.6591e+06	2.96123e+06
703	408.436	425.112	451126	1.41304e+06	1.45245e+06	713860	1.29681e+06	728585	569298	1.01706e+06	200333	270888	246890	1.05138e+06	764158	466540	1.34168e+06	305566	771571	419315	1.38926e+06	2.89767e+06	750740	396372	2.36852e+06
704	430.461	219.096	1.88608e+06	406550	3.09347e+06	2.47815e+06	6.13627e+06	431518	2.477e+06	1.94726e+06	9.55721e+06	2.21762e+07	201358	2.24397e+07	179420	0	68070.8	9.20984e+06	180449	6.22113e+06	994348	0	4.8652e+06	5.16214e+06	5.10706e+06
705	77.5932	131.081	0	0	1.0187e+06	4.3107e+06	0	2.83133e+06	5.91284e+06	0	8.68522e+06	0	2.30911e+08	1.13043e+06	969428	1.01637e+06	1.91719e+08	9.6489e+07	2.91641e+08	1.90041e+08	1.9499e+06	827596	4.00452e+07	3.91755e+07	3.96826e+07
706	315.193	203.051	5.21718e+06	2.47106e+07	1.07046e+07	1.1555e+07	1.15837e+07	1.31039e+07	1.42261e+07	2.54644e+07	5.67852e+06	4.53301e+06	1.49712e+07	5.50835e+06	2.30468e+07	2.45519e+07	2.44406e+07	9.41325e+06	2.34914e+07	1.25814e+07	1.33476e+07	1.52414e+07	1.34651e+07	1.20508e+07	1.30184e+07
707	153.187	784.485	4.67694e+07	3.48982e+07	3.60148e+07	3.61635e+07	3.70114e+07	4.56699e+07	4.48675e+07	4.88973e+07	1.64654e+07	1.32209e+07	9.33519e+06	1.08152e+07	7.45799e+06	9.28504e+06	4.22097e+06	4.07411e+06	6.54719e+06	5.10286e+06	9.45461e+06	7.73978e+06	2.37285e+07	2.13049e+07	2.53846e+07
708	450.02	493.206	0	0	119425	19327.7	1.06425e+06	0	56215.6	43780	651351	491626	24850.9	715252	27772.7	0	0	146131	39439.5	140581	234859	28567.2	286439	245965	238777
709	80.7824	591.423	722524	1.90668e+06	2.1192e+06	5.37042e+06	672144	1.14908e+06	1.28139e+06	917511	1.9899e+06	1.24048e+06	2.43671e+06	381792	1.21959e+06	1.65603e+06	981471	970751	1.24603e+06	2.00711e+06	1.24027e+06	1.76885e+06	1.6936e+06	1.24524e+06	1.54801e+06
710	56.4736	175.095	1.48292e+06	251613	124154	785520	1.04449e+06	247860	1.04244e+06	1.77393e+06	1.33508e+06	1.92228e+06	3.03728e+06	1.73553e+07	4.48332e+06	4.43067e+06	1.24418e+06	3.25582e+06	2.78713e+06	2.763e+06	4.90248e+06	1.74681e+06	2.10205e+06	2.00175e+06	2.98707e+06
711	442.578	253.128	198744	71402.9	184481	337968	579447	140531	137223	250207	899481	2.31427e+06	93174.4	861048	36635.3	0	41274.7	1.68843e+06	29363.1	494554	335627	47846.3	530233	500062	637021
712	112.678	209.091	1.18566e+07	4.06884e+06	4.90574e+06	9.12682e+06	8.96912e+06	1.64728e+07	1.3525e+07	3.5003e+06	3.86375e+06	5.56017e+06	5.98053e+06	5.04491e+06	954393	788760	8.26362e+06	4.94359e+06	1.14538e+07	4.20086e+06	1.31324e+07	8.66829e+06	2.15807e+06	1.97867e+06	2.70325e+06
713	195.093	285.13	213162	0	178816	0	250288	0	363637	0	148578	0	728215	1.54325e+06	545093	1.62065e+06	1.59331e+06	2.28598e+06	2.44144e+06	1.54231e+06	1.65135e+06	513509	99710.9	263480	112167
714	199.721	297.147	184896	0	0	1.11862e+06	820183	0	361621	55669.2	658934	202655	3.06093e+06	2.31882e+07	8.32282e+06	1.29567e+06	5.54376e+06	1.83129e+06	646094	2.70129e+06	1.37802e+06	2.58344e+06	2.00575e+06	2.27713e+06	2.52528e+06
715	257.21	151.08	1.30716e+07	764283	3.39373e+06	2.24193e+06	2.53063e+06	2.9901e+06	5.22862e+06	1.70667e+06	1.71798e+06	1.90066e+06	1.86517e+06	2.8922e+06	2.40521e+06	278683	401349	1.78018e+06	540644	874463	213870	1.4827e+06	2.14131e+06	1.85758e+06	1.75408e+06
716	269.658	260.052	247031	693256	151655	2.39592e+06	3.38371e+06	5.05385e+06	4.77112e+06	1.07856e+06	295757	1.841e+06	464769	547932	659608	1.95455e+06	0	3.09956e+06	224141	332803	526167	808719	1.15025e+06	900622	1.13828e+06
717	198.685	517.129	0	0	0	0	0	0	0	0	0	0	466687	473683	486684	564222	3.40619e+06	1.11677e+06	1.07647e+06	1.43591e+06	637278	497983	281763	170029	109264
718	410.104	245.094	1.36953e+06	310233	702635	1.16757e+06	4.18654e+06	347304	459664	669338	1.94646e+06	6.44256e+07	292347	2.36156e+07	484993	345570	332776	1.09847e+06	1.6711e+06	583150	382771	347103	5.78536e+06	5.22127e+06	5.73465e+06
719	345.596	161.091	4.50774e+06	1.71357e+06	4.07203e+06	5.12306e+06	1.82432e+07	3.4745e+06	5.30859e+06	3.59093e+06	9.60026e+06	1.88834e+07	6.0806e+06	1.14774e+07	5.7986e+06	522518	779380	1.3015e+07	1.48782e+07	1.67463e+07	2.92677e+06	1.75161e+06	1.21359e+07	1.17272e+07	1.06454e+07
720	149.917	233.116	4.28001e+06	1.76304e+06	1.61685e+06	1.12032e+06	664801	1.48e+06	1.77622e+06	971196	1.35342e+06	1.07071e+06	2.1737e+06	57549.2	0	1.25956e+06	128401	169378	0	0	44955.6	65757.5	756110	943038	988882
721	382.803	227.101	1.19632e+06	524915	865476	1.91597e+06	1.96998e+06	544029	1.00604e+06	1.08759e+06	3.50906e+06	6.9071e+06	332826	3.78511e+06	505153	1.42279e+06	625533	2.68164e+06	539274	1.71216e+06	673701	680954	2.14871e+06	1.99633e+06	1.97122e+06
722	314.722	200.091	842809	300454	1.36284e+06	477428	66096.2	706949	416407	487981	1.1636e+06	95490	1.53525e+06	1.02291e+06	882101	859654	1.29907e+06	1.98667e+06	1.77279e+06	1.40828e+06	2.0909e+06	1.50665e+06	1.09002e+06	1.1059e+06	640572
723	31.25	429.371	1.85754e+07	8.73259e+06	5.58659e+06	1.12557e+07	1.30618e+07	5.40066e+06	2.90856e+06	4.20876e+06	1.13733e+07	9.64125e+06	3.40202e+06	2.78764e+06	1.7238e+06	865847	1.15868e+06	7.509e+06	2.87295e+06	424310	4.35891e+06	3.03728e+06	219502	4.33792e+06	3.50242e+06
724	219.77	510.354	7.22092e+06	5.72798e+06	3.19945e+06	1.24418e+06	2.59439e+06	7.65277e+07	1.47629e+07	4.78424e+06	6.71818e+06	3.42485e+06	805541	5.3477e+06	767538	234631	410832	315602	771483	1.89984e+06	967864	382987	2.91125e+06	5.31096e+06	2.82954e+06
725	131.478	489.287	1.53232e+07	6.45006e+06	4.86467e+06	7.16869e+06	3.87372e+06	1.02079e+07	1.02073e+07	7.9795e+06	1.4888e+06	1.0871e+07	1.5181e+07	4.00708e+07	2.15859e+07	2.81718e+07	1.33279e+07	9.17636e+06	1.85468e+07	1.0383e+07	3.16727e+07	2.10516e+07	1.42561e+07	1.95669e+07	1.79215e+07
726	119.853	303.178	0	4.45345e+06	3.67345e+06	687037	5.60585e+06	2.18429e+06	1.24278e+06	4.78626e+06	0	0	8.07987e+07	1.95436e+08	1.55575e+08	1.7553e+08	1.15338e+08	6.10773e+07	1.28258e+08	7.03478e+07	2.07811e+08	1.06772e+08	7.33878e+07	7.56859e+07	8.02908e+07
727	187.861	379.136	1.10116e+06	1.61364e+06	383618	1.52722e+06	288634	719114	1.10119e+06	542228	971741	561390	162236	115635	31682.7	257287	113774	131337	103803	0	42439.5	0	735047	321886	719578
728	429.421	520.185	177840	374451	2.61009e+06	1.31545e+06	685413	735830	163211	924657	358332	61486.2	363611	993745	560371	405617	146417	1.33091e+06	119236	161609	842131	893766	915085	931131	925082
729	31.4776	259.168	404385	419471	284112	110792	159075	192448	345729	360474	158665	230382	1.74123e+06	1.63062e+06	1.92899e+06	2.59816e+06	2.94608e+06	2.72906e+06	2.26758e+06	1.80035e+06	2.53468e+06	1.6438e+06	1.63637e+06	1.39327e+06	1.4527e+06
730	260.624	868.505	0	0	0	0	0	0	0	0	0	0	319795	937945	354911	270513	221896	311156	368448	242641	423826	626343	417649	49780	289284
731	174.404	575.5	386091	692983	1.23334e+06	2.30723e+06	1.83546e+06	0	306268	1.81331e+06	2.16417e+06	1.12453e+06	455179	1.83357e+06	526833	94322.3	106911	1.06181e+06	903201	1.18165e+06	946286	67351.1	1.47795e+06	1.1314e+06	1.13488e+06
732	29.0173	383.366	2.56188e+06	1.20097e+06	2.81284e+06	999999	806622	753750	594317	1.45211e+06	314572	811609	0	0	0	0	0	0	124899	36404	0	0	613361	689204	587511
733	213.303	480.343	5.01699e+07	8.91056e+06	2.25585e+06	1.43451e+06	1.7391e+06	8.82922e+07	1.74135e+07	175839	1.25112e+06	4.36268e+06	694837	39365.9	111400	132295	228464	5.28936e+06	405825	1.34756e+06	580688	54725.4	9.4926e+06	9.19889e+06	7.82595e+06
734	72.9166	301.106	3.05964e+06	376579	2.65125e+06	3.43907e+06	1.7041e+06	934582	1.98086e+06	0	0	1.90028e+06	2.23256e+06	0	2.47267e+06	282247	2.72742e+06	3.05968e+06	3.5152e+06	1.1286e+06	1.33073e+06	4.16429e+06	926255	1.33225e+06	1.6635e+06
735	150.237	209.152	7.64614e+07	2.23334e+07	1.29696e+08	3.08307e+07	3.35678e+07	5.25727e+07	5.076e+07	5.15369e+07	2.93361e+07	6.22619e+07	3.17394e+06	660714	1.79769e+06	302091	3.8616e+06	2.23803e+06	1.67721e+06	3.40885e+06	2.33915e+06	1.21966e+06	3.39283e+07	3.32963e+07	3.14631e+07
736	232.268	301.105	1.40892e+06	476042	1.63262e+06	248668	562265	1.11137e+06	627177	838595	619487	319531	0	0	0	197528	187886	21375.7	0	0	0	0	568481	248452	482846
737	119.398	328.319	4.40111e+06	1.68436e+06	1.26591e+06	0	1.86456e+06	462767	2.62462e+06	3.01892e+06	4.47885e+06	1.18346e+06	736931	2.02409e+06	117930	43565.3	0	1.13486e+06	170144	683208	346725	445365	1.69227e+06	1.62455e+06	1.5696e+06
738	321.138	395.2	52951.4	0	827886	1.08628e+06	1.09691e+06	30032.8	184694	79017.1	741786	1.23534e+06	0	26844.3	0	0	0	709406	0	0	226399	0	375604	348433	652037
739	155.698	195.1	6.11551e+07	1.49475e+07	3.45785e+07	1.60977e+07	3.45258e+07	3.10181e+07	2.45143e+07	3.23212e+07	2.7787e+07	2.47611e+07	8.51647e+06	4.27721e+06	2.83353e+06	5.1111e+06	6.77417e+06	6.80536e+06	4.36854e+06	5.15818e+06	1.18629e+07	4.33587e+06	1.81127e+07	1.86264e+07	1.8211e+07
740	31.3696	345.241	0	52201.4	0	0	0	0	96471.1	95810.1	0	0	786888	700455	1.00085e+06	2.94346e+06	2.44553e+06	1.1853e+06	1.17079e+06	935197	1.19751e+06	1.21518e+06	793338	869397	752734
741	158.647	300.288	1.49999e+07	4.04237e+06	6.21062e+06	1.8867e+06	5.44078e+06	3.27406e+06	5.22736e+06	5.32527e+06	1.49176e+07	7.38699e+06	1.30058e+06	4.9759e+06	622948	158503	412412	4.41699e+06	1.04782e+06	3.46717e+06	1.21318e+06	972228	5.6605e+06	5.05332e+06	5.99424e+06
742	313.178	246.143	8.85213e+06	4.01321e+06	4.18716e+06	6.54108e+06	1.48704e+07	791615	3.39137e+06	2.20732e+06	3.09566e+07	3.72425e+07	1.02679e+06	1.38186e+07	352928	877050	480482	1.2869e+07	1.16332e+06	4.53024e+06	2.29846e+06	279997	9.32422e+06	9.70724e+06	7.67181e+06
743	119.799	361.126	1.8605e+06	4.58509e+06	1.86861e+06	2.9495e+06	2.7666e+06	2.86311e+06	3.47064e+06	1.84301e+06	985520	1.18659e+06	356950	0	0	420308	463599	327810	313753	0	0	173484	1.63183e+06	1.48921e+06	1.42156e+06
744	193.356	405.188	8.32723e+06	2.59279e+06	2.6236e+07	3.29304e+06	4.00326e+06	8.30806e+06	7.16475e+06	4.43883e+06	5.37037e+06	1.2512e+07	0	1.10418e+06	22763	0	45830	0	0	123227	43387	0	6.49471e+06	6.43638e+06	6.15051e+06
745	125.582	341.136	3.18752e+06	7.89426e+06	2.34484e+06	6.65077e+06	4.91329e+06	7.71413e+06	7.18611e+06	4.32671e+06	3.08412e+06	2.56634e+06	0	251584	0	1.38122e+06	169384	0	0	0	0	0	1.78882e+06	2.89629e+06	2.8756e+06
746	222.598	880.584	1.11692e+06	96742.2	842242	1.2309e+06	1.18636e+06	342028	128986	25979	1.16843e+06	1.52464e+06	291166	104532	461119	138003	404811	1.2811e+06	349573	1.12592e+06	703299	294153	721162	740999	715073
747	407.512	328.104	79084.4	88632	860567	827038	773895	119898	116455	465844	1.88394e+06	5.03436e+06	0	91328.5	0	0	0	244900	0	37098.7	247542	0	735067	840414	838638
748	141.308	429.371	551050	571610	389993	712740	435142	171145	450031	392235	109965	180794	0	0	0	0	0	0	0	0	0	0	139334	71447.5	170292
749	276.508	265.153	879999	1.58697e+08	1.15236e+07	4.15602e+06	672463	0	311259	0	7.8783e+06	5.01704e+07	24583.7	0	101186	0	0	0	0	534629	537904	122100	1.84852e+07	1.74132e+07	1.88021e+07
750	33.4255	301.272	3.08191e+06	3.39852e+06	4.41513e+06	4.52248e+06	2.18399e+06	3.71432e+06	4.39607e+06	5.13357e+06	4.6158e+06	811930	0	488616	0	0	0	0	237194	0	0	0	2.31978e+06	2.38954e+06	2.40412e+06
751	176.456	251.09	5.60234e+06	4.21914e+06	4.41132e+06	2.86177e+06	2.34938e+06	5.49399e+06	2.80319e+06	2.973e+06	996892	2.34186e+06	108274	0	255869	50680.2	376768	0	50759.7	0	68912.9	89829.8	2.11239e+06	2.02971e+06	2.14683e+06
752	57.2898	188.091	3.3641e+06	1.87403e+06	2.90523e+06	9.0812e+06	895339	1.4726e+06	6.20966e+06	2.86732e+06	1.81228e+06	1.47222e+06	625028	634219	434692	912170	722585	705276	293351	698201	2.66627e+06	552888	1.0728e+06	650352	816482
753	142.553	533.314	9.37277e+06	7.24956e+06	7.16297e+06	4.74978e+06	5.26294e+06	6.77762e+06	6.07895e+06	8.40369e+06	447931	5.64644e+06	9.44794e+06	2.27805e+07	1.3896e+07	1.83303e+07	7.69471e+06	6.25038e+06	1.10732e+07	8.10009e+06	2.40244e+07	1.70705e+07	9.68009e+06	9.14747e+06	9.64243e+06
754	226.093	549.485	2.45201e+06	110415	1.35411e+06	302014	1.79404e+06	0	225518	105415	5.52769e+06	408191	194529	539877	531081	95679.7	152789	361717	386777	916357	297120	151709	1.17284e+06	1.14071e+06	1.15655e+06
755	477.823	621.305	294374	0	0	0	170370	0	0	0	2.25416e+06	4.00679e+06	0	757681	101433	0	0	0	5412.13	26904.4	0	0	463824	493409	368378
756	399.197	405.155	443020	86446.7	2.73186e+06	50237.8	64624.4	46824.2	233357	127417	391093	67442.8	0	0	0	0	0	0	0	0	0	0	294079	233125	268868
757	163.95	854.693	2.45066e+06	3.31232e+06	9.15342e+06	3.25173e+07	2.8313e+07	1.39828e+07	2.70628e+07	1.47448e+06	9.11823e+06	5.11258e+07	5.10429e+06	630976	2.48256e+06	698455	1.22288e+07	2.94396e+07	4.04698e+06	2.4599e+07	9.90981e+06	5.5535e+06	1.27185e+07	1.45272e+07	1.41964e+07
758	382.889	343.122	27473.9	49180.7	444031	229250	661110	340710	383309	859511	412720	0	10256.1	0	12592.2	14908.5	112686	0	8575.14	14947.7	11542.9	15376.4	255888	245742	197271
759	351.187	265.142	810522	0	542821	27193.9	224762	361326	323431	406971	177484	171132	1.99938e+07	2.59316e+07	1.79024e+07	1.16876e+07	2.75633e+07	2.7287e+07	1.96676e+07	2.00747e+07	4.98284e+07	2.18736e+07	8.72243e+06	8.58206e+06	8.55222e+06
760	308.698	214.106	3.39668e+06	1.1648e+06	3.22136e+06	1.40158e+06	736464	3.43434e+06	2.74581e+06	1.78949e+06	2.02709e+06	284177	3.38871e+06	2.29894e+06	2.67705e+06	2.64713e+06	7.71219e+06	8.35305e+06	6.74547e+06	5.25553e+06	1.84657e+07	5.17809e+06	4.22449e+06	3.97535e+06	3.86695e+06
761	313.207	338.18	0	0	93595.8	25715.3	1.09985e+06	0	0	0	1.04275e+06	900274	59547.4	237508	0	0	0	98452.3	119753	2.23899e+06	24898.8	0	231904	269283	175248
762	165.141	826.664	1.41807e+06	2.26175e+06	6.08479e+06	2.26494e+07	2.10728e+07	9.7532e+06	2.1422e+07	697994	5.33682e+06	3.5404e+07	4.06802e+06	409898	1.87294e+06	523080	9.8988e+06	1.88005e+07	4.48498e+06	1.86524e+07	8.01584e+06	4.56447e+06	8.92483e+06	1.02338e+07	1.03674e+07
763	295.135	227.09	6.70859e+07	7.39895e+06	3.05492e+07	1.17767e+07	1.79615e+07	3.17951e+07	2.35028e+07	2.03126e+07	1.2203e+07	2.19906e+07	342419	484035	305143	562517	988066	771303	458384	772119	1.05562e+06	404995	1.66714e+07	1.64794e+07	1.57139e+07
764	205.615	396.308	1.10282e+06	0	1.55801e+06	80119	774811	415815	2.73407e+06	340664	4.12835e+06	1.4096e+06	0	744324	35272.3	121656	178879	287716	102863	1.1614e+06	91685.8	79146.1	517080	535502	344736
765	116.216	132.065	7.78427e+06	3.92909e+06	1.13241e+07	1.26571e+07	2.11246e+06	1.00187e+06	1.18574e+07	4.55987e+06	2.52122e+06	4.86796e+06	1.79619e+06	627571	1.06963e+06	1.46794e+06	2.50952e+06	1.06084e+06	1.29583e+06	1.81628e+06	1.61566e+06	1.29305e+06	3.37995e+06	3.23207e+06	2.72751e+06
766	35.1377	275.199	780461	491609	433664	571089	529306	337487	220053	380923	0	346442	7.01102e+06	8.51055e+06	6.16794e+06	1.01386e+07	1.10624e+07	9.9511e+06	7.92122e+06	4.51867e+06	9.41238e+06	7.48036e+06	6.09486e+06	6.26451e+06	5.70158e+06
767	211.481	538.517	532978	187139	401706	2.85485e+06	1.89162e+06	1.86763e+06	1.47968e+06	0	500027	2.15562e+06	545286	0	128961	46172	691255	1.716e+06	490526	1.54663e+06	638750	290998	1.15709e+06	963223	878188
768	164.63	796.616	3.76367e+06	5.34149e+06	1.42014e+07	4.83473e+07	3.7812e+07	1.10793e+07	3.09557e+07	2.77615e+06	1.34303e+07	6.83069e+07	5.58269e+06	2.112e+06	3.36788e+06	1.42043e+06	1.15564e+07	3.3805e+07	7.20558e+06	3.62128e+07	1.59958e+07	6.21124e+06	1.81623e+07	1.94581e+07	1.94074e+07
769	52.023	327.121	6.78989e+06	4.38192e+06	6.70239e+06	3.47724e+06	6.35385e+06	6.70331e+06	1.03836e+07	2.00677e+06	4.33979e+06	5.56585e+06	0	0	0	229139	0	0	228713	0	0	0	913343	918913	896264
770	158.647	107.085	4.24085e+06	3.4535e+06	7.29198e+06	2.34024e+06	2.64385e+06	4.44244e+06	4.53032e+06	1.50967e+06	2.58829e+06	2.97046e+06	1.65526e+06	1.08332e+06	309279	0	1.3302e+06	1.11662e+06	998643	463443	2.19101e+06	301831	2.52837e+06	2.21277e+06	2.18651e+06
771	142.481	419.168	330225	5.11353e+06	4.05942e+06	1.8365e+06	1.70117e+06	3.61318e+06	2.63564e+06	7.309e+06	1.64838e+06	6.79649e+06	1.40442e+07	7.7189e+06	3.87473e+06	6.05591e+06	1.16868e+07	8.19453e+06	6.68163e+06	1.87556e+06	9.44703e+06	8.59119e+06	4.83907e+06	5.41154e+06	4.80017e+06
772	165.749	798.632	5.63368e+06	2.78852e+06	7.06864e+06	2.43004e+07	2.02561e+07	8.96727e+06	2.31014e+07	1.33743e+06	4.78995e+06	3.53494e+07	4.26108e+06	1.47682e+06	2.12327e+06	828686	1.05573e+07	1.72833e+07	4.26027e+06	1.86194e+07	9.7997e+06	5.21458e+06	1.07287e+07	1.14455e+07	1.13797e+07
773	50.9585	345.131	1.42572e+07	7.82333e+06	1.04117e+07	1.69995e+07	1.12669e+07	6.60942e+06	1.30887e+07	6.91363e+06	7.12812e+06	6.52906e+06	1.51654e+06	661027	1.11729e+06	553410	1.43548e+06	836625	1.95432e+06	639686	988184	3.04108e+06	4.1738e+06	4.19323e+06	5.41813e+06
774	284.12	213.111	113359	29272.2	0	205266	0	0	0	0	385923	0	2.41758e+06	2.00187e+06	1.04435e+06	1.16545e+06	1.01989e+06	241119	1.06305e+06	2.82925e+06	3.72813e+06	767195	164111	90454.4	0
775	167.334	770.601	6.84034e+06	1.59418e+07	2.56112e+07	5.65583e+07	4.62674e+07	1.93797e+07	6.30775e+07	8.70655e+06	2.11913e+07	9.02231e+07	1.7486e+07	4.49572e+06	8.58817e+06	4.80074e+06	2.65296e+07	5.06565e+07	1.49848e+07	4.05768e+07	3.19639e+07	1.88267e+07	3.23435e+07	3.35349e+07	2.96941e+07
776	141.581	265.106	5.35902e+06	7.74934e+06	4.52987e+06	5.29872e+06	5.07036e+06	9.80432e+06	6.61781e+06	6.71146e+06	3.71997e+06	2.47629e+06	4.09473e+07	1.15099e+07	1.21127e+07	1.85995e+07	3.31895e+07	2.57587e+07	2.02288e+07	6.92429e+06	2.71037e+07	2.38509e+07	1.34871e+07	1.33608e+07	1.27811e+07
777	94.1725	273.132	0	102025	0	72257.9	0	0	0	0	0	0	2.57714e+06	3.63703e+06	1.97209e+06	1.9557e+06	3.0685e+06	3.42891e+06	2.07692e+06	3.22606e+06	2.9748e+06	1.75606e+06	1.38877e+06	1.65378e+06	1.25425e+06
778	199.322	281.101	2.89524e+06	1.24993e+06	3.94274e+06	900421	914950	1.09316e+06	844993	1.62964e+06	1.99353e+06	2.31524e+06	1.55043e+07	2.30276e+07	1.67057e+07	2.33061e+07	3.65559e+07	2.66692e+07	2.52278e+07	2.24591e+07	2.02219e+07	2.26066e+07	1.04428e+07	1.0467e+07	9.50835e+06
779	39.7766	109.065	2.21213e+06	1.57801e+06	1.29313e+06	1.30113e+06	2.14947e+06	2.01356e+06	1.15472e+06	1.80343e+06	370666	1.26491e+06	1.51372e+07	1.33703e+07	1.04953e+07	3.35414e+06	1.8378e+07	1.75176e+07	8.37857e+06	1.33627e+07	1.38206e+07	9.53603e+06	7.98475e+06	7.04455e+06	5.93295e+06
780	205.001	759.633	2.81384e+07	1.54467e+07	1.72314e+07	1.23819e+07	2.5612e+07	2.08717e+07	2.30439e+07	1.82414e+07	3.39311e+07	6.35051e+06	8.56993e+06	7.79071e+06	3.88379e+06	3.34942e+06	1.85247e+06	8.29502e+06	6.18516e+06	1.0595e+07	3.70475e+06	4.11378e+06	8.04953e+06	8.1304e+06	6.8546e+06
781	31.5862	193.121	853555	484984	182685	338189	556324	935804	692319	0	139127	112192	9.16285e+06	9.66549e+06	1.00706e+07	1.03724e+07	2.37867e+07	2.22357e+07	9.39517e+06	9.74307e+06	1.25584e+07	1.65621e+07	1.07392e+07	7.3225e+06	6.98489e+06
782	48.3527	862.64	4.98971e+06	5.04941e+06	5.05893e+06	5.60162e+06	3.10214e+06	5.64038e+06	5.0105e+06	4.58022e+06	5.63905e+06	2.47416e+06	343474	967504	390177	595733	576525	0	586837	445566	341744	490016	2.00883e+06	2.21489e+06	2.19404e+06
783	480.347	207.096	483660	420220	334565	228339	1.35094e+06	215078	417819	580487	1.43476e+06	1.9012e+06	0	477207	413575	229058	532773	105498	457992	251228	531350	532911	1.11117e+06	1.22474e+06	1.08938e+06
784	141.106	203.069	4.63469e+06	1.43565e+06	2.15649e+06	2.54195e+06	383366	3.70853e+06	3.60202e+06	1.10532e+06	2.30912e+06	1.35166e+06	5.15138e+06	1.0474e+06	1.49028e+06	2.23826e+06	4.11856e+06	3.6508e+06	2.78647e+06	995893	3.48296e+06	2.56529e+06	1.76593e+06	1.52547e+06	1.82583e+06
785	193.238	387.178	3.5766e+06	1.00626e+06	1.05465e+07	836502	1.22117e+06	3.20902e+06	2.22838e+06	1.77374e+06	2.25115e+06	4.69634e+06	132385	376899	85701.2	37128.4	133391	93748.4	67649.7	254805	128736	0	2.579e+06	2.39653e+06	2.40657e+06
786	189.058	154.049	8.37342e+06	1.6889e+07	1.65487e+07	1.68685e+07	1.27257e+07	1.25988e+07	1.33977e+07	1.22078e+07	1.20677e+07	1.96363e+07	196896	0	96202.8	284698	453566	0	935726	26735.5	111165	183995	1.04039e+07	1.14925e+07	9.62618e+06
787	174.632	706.535	5.9528e+06	9.75377e+06	1.37104e+07	1.58373e+07	1.11629e+07	5.25559e+06	1.58908e+07	1.69009e+06	3.45111e+07	1.77218e+07	3.26345e+06	2.521e+06	1.58266e+06	695375	1.75588e+06	1.12607e+07	3.61832e+06	1.41365e+07	7.13023e+06	1.24893e+06	1.12057e+07	1.0071e+07	1.00111e+07
788	162.956	792.586	3.49457e+06	4.99164e+06	3.90274e+06	9.23297e+06	5.94571e+06	1.53226e+06	9.34657e+06	557218	8.22759e+06	1.6687e+07	573184	805292	634228	493095	1.62002e+06	9.10509e+06	2.43767e+06	8.65873e+06	4.61109e+06	1.32445e+06	4.50923e+06	4.61097e+06	4.54724e+06
789	148.196	263.235	3.26674e+06	905795	1.21465e+06	0	2.29302e+06	392540	3.31406e+06	1.85818e+06	3.31643e+06	433392	0	996692	0	0	0	439867	0	1.55041e+06	0	0	330231	396494	1.16593e+06
790	165.727	830.692	440519	1.13949e+06	1.76638e+06	7.43926e+06	5.79299e+06	8.28105e+06	5.91805e+06	372302	1.04003e+06	8.79173e+06	1.13121e+06	245834	494701	66944.5	3.51895e+06	6.37054e+06	877383	4.8469e+06	1.55271e+06	1.21536e+06	2.64709e+06	3.00264e+06	3.12362e+06
791	344.661	378.138	184280	152089	294183	247813	362507	321396	495424	169492	89949.8	107058	118019	0	60563.9	163364	122266	51068.4	15104.8	19317.7	183853	86402	164321	192996	167013
792	35.9958	253.142	0	155245	132570	0	241862	0	0	0	0	0	6.24688e+06	9.77642e+06	7.39749e+06	4.43129e+06	6.71148e+06	8.74753e+06	4.1456e+06	6.50249e+06	5.36687e+06	7.5693e+06	3.32317e+06	3.90419e+06	4.26877e+06
793	408.289	288.106	140693	109191	396734	379256	25538.3	2.29957e+06	118741	129511	308304	184622	226526	121780	281879	530016	768308	165428	468583	219777	4.325e+06	182774	471709	370750	458961
794	166.5	800.648	5.65071e+06	2.15623e+06	5.08545e+06	1.91876e+07	1.48702e+07	1.33422e+07	2.07027e+07	2.2406e+06	7.18871e+06	2.62492e+07	3.27808e+06	4.55878e+06	2.32213e+06	599352	9.16987e+06	1.46393e+07	3.8021e+06	1.29977e+07	7.85699e+06	3.82545e+06	7.71924e+06	9.30731e+06	8.78228e+06
795	179.525	231.121	631923	403053	542829	117794	72983.9	128085	145500	243438	0	111296	1.35467e+06	2.6508e+06	1.61637e+06	3.2022e+06	1.97645e+06	593826	2.13229e+06	493991	1.92578e+06	1.07354e+06	499522	531260	713506
796	141.455	371.147	0	0	232897	600428	0	338951	141406	550244	0	1.24535e+06	1.53894e+07	2.08234e+06	3.22761e+06	4.20622e+06	1.25264e+07	8.68797e+06	6.92452e+06	1.57508e+06	8.13262e+06	8.48418e+06	1.35259e+06	982927	1.09975e+06
797	234.169	109.028	1.69966e+06	468903	1.79362e+06	1.48107e+06	1.18914e+06	479704	1.37032e+06	923825	1.50191e+06	1.17159e+06	66558.4	0	61754	0	363856	95406.7	165005	0	757050	58440	894422	709665	819123
798	76.4778	429.371	4.44888e+06	7.30336e+06	4.87904e+06	1.35478e+07	5.48984e+06	3.72984e+06	5.844e+06	2.82907e+06	1.39255e+06	2.84523e+06	2.04123e+06	0	97515.2	0	526654	720951	461747	1.19438e+06	250491	545395	2.48279e+06	2.66917e+06	2.19874e+06
799	319.561	247.11	591249	143389	554452	2.29885e+06	2.08049e+06	0	364189	716035	2.17642e+06	1.08117e+06	259657	525391	67972	95076.1	30721.2	1.43042e+07	0	4.23989e+06	781377	62285.7	1.6205e+06	1.28875e+06	1.73926e+06
800	489.038	187.143	1.12917e+07	355305	7.30793e+06	822889	694662	716897	3.07241e+06	304282	987609	2.44085e+07	306187	215601	322256	325723	316115	292108	272715	299739	324549	330595	3.34458e+06	3.36183e+06	2.88216e+06
801	127.361	351.105	9.5993e+06	3.25682e+06	1.96156e+07	1.77798e+06	4.22708e+06	1.08347e+07	4.83812e+06	1.98803e+07	5.00663e+06	8.05925e+06	622053	106160	41961.3	202369	357386	185863	172199	124460	578672	0	6.42481e+06	4.13285e+06	6.32326e+06
802	171.024	718.569	4.14395e+07	2.40432e+07	2.87565e+07	2.79443e+07	5.86798e+07	4.69843e+07	8.1582e+07	6.00609e+07	1.20959e+08	1.13241e+08	2.31497e+07	8.60538e+07	1.67353e+07	1.28306e+07	1.6433e+07	4.02237e+07	1.68617e+07	3.36799e+07	2.49566e+07	2.83852e+07	6.27778e+07	6.05046e+07	5.81117e+07
803	451.988	438.232	589255	357276	339760	1.8683e+06	587954	261304	191588	26479.2	7.56841e+06	6.3129e+06	503055	1.10259e+06	187562	0	32080.9	276070	243533	993478	219270	25888.6	1.48192e+06	1.53381e+06	1.5418e+06
804	51.9819	339.121	2.47321e+06	3.06668e+06	1.85446e+06	2.06731e+06	6.17614e+06	2.66628e+06	3.61259e+06	948496	1.68219e+06	2.37035e+06	0	0	196347	501516	0	0	753115	0	0	0	1.12918e+06	1.04371e+06	852730
805	249.421	267.132	2.05512e+07	330571	3.88382e+06	9.66482e+06	2.50953e+07	961523	1.40762e+07	1.23584e+06	2.83721e+07	4.43903e+07	609590	1.64953e+07	435362	0	665027	2.83164e+07	1.06626e+06	1.11395e+07	2.196e+06	323895	3.75702e+07	3.60592e+07	2.1742e+07
806	200.264	761.649	8.2168e+06	3.80338e+06	3.43093e+06	2.26146e+06	6.53957e+06	5.8554e+06	4.54261e+06	5.342e+06	9.31609e+06	2.045e+06	3.47021e+06	2.23564e+06	1.74276e+06	1.17143e+06	1.06853e+06	3.96409e+06	3.76097e+06	7.87574e+06	2.17464e+06	2.5761e+06	3.08462e+06	3.16285e+06	3.08502e+06
807	300.184	279.133	3.07438e+06	95500.4	1.49913e+06	916058	1.00313e+07	259847	1.57621e+06	630391	9.267e+06	2.92527e+07	364855	3.31844e+06	529884	0	0	1.30147e+07	1.01885e+06	7.1153e+06	967893	210722	1.74244e+06	4.42571e+06	1.23704e+06
808	290.797	333.131	1.24549e+06	2.67114e+06	1.17805e+06	1.34496e+06	1.19796e+06	776849	2.64138e+06	1.28256e+06	3.16258e+06	1.52297e+06	40334.3	0	57188.6	0	0	0	0	0	0	0	1.49788e+06	1.66122e+06	1.60485e+06
809	37.8072	758.56	4.13189e+06	3.89107e+06	4.71115e+06	1.05636e+07	7.67254e+06	3.27021e+06	5.06108e+06	5.97678e+06	1.04753e+07	9.31415e+06	1.72755e+06	5.47033e+06	3.18568e+06	2.26491e+06	2.6268e+06	3.97423e+06	3.8915e+06	3.53713e+06	3.50452e+06	3.01413e+06	5.3881e+06	5.92897e+06	5.21652e+06
810	202.833	801.679	6.76448e+06	4.47311e+06	3.5745e+06	2.7127e+06	7.68137e+06	6.71504e+06	7.25047e+06	5.26808e+06	6.97764e+06	1.16362e+06	4.6528e+06	2.75842e+06	1.82601e+06	1.05649e+06	1.30909e+06	4.44385e+06	2.38906e+06	6.06167e+06	1.53888e+06	1.29224e+06	2.33923e+06	2.49907e+06	2.19854e+06
811	149.323	199.096	1.01147e+06	1.04522e+06	2.20764e+06	2.90949e+06	2.49455e+06	1.74279e+06	2.31823e+06	1.45013e+06	1.04176e+06	2.84273e+06	532567	1.13704e+06	807504	528143	92532.6	345407	408500	400585	989851	669746	1.05639e+06	690195	1.05389e+06
812	323.81	401.177	74904.9	90021.8	83268.9	71049.5	150618	46837.3	22483.3	27149.6	0	0	1.54996e+06	0	2.10193e+06	1.61572e+06	435058	431793	1.28942e+06	605419	1.31246e+06	197517	465902	601355	562337
813	166.556	742.57	4.66288e+06	4.24679e+07	1.45627e+07	1.55935e+07	1.16885e+07	4.23416e+06	2.09239e+07	2.89967e+06	7.13169e+06	2.38208e+07	5.54705e+06	2.29803e+06	3.44422e+06	1.22324e+06	6.45995e+06	1.57745e+07	5.85946e+06	1.44344e+07	1.20814e+07	4.87468e+06	1.03123e+07	1.07716e+07	1.08916e+07
814	110.999	223.095	1.73863e+06	2.30473e+06	2.39883e+06	2.38979e+06	3.00159e+06	3.41346e+06	3.13167e+06	1.52925e+06	877529	1.0521e+06	958862	492142	564835	774770	921068	1.10616e+06	588897	791251	851598	820340	1.23032e+06	1.11897e+06	1.20745e+06
815	152.485	337.105	2.59943e+06	1.79327e+06	3.45743e+06	310307	1.96868e+06	2.55952e+06	2.81443e+06	1.32968e+06	995480	732407	0	0	0	0	0	49471.8	0	0	0	0	1.22131e+06	827293	895661
816	71.2633	227.174	8.48858e+06	1.08518e+07	6.81004e+06	1.03541e+07	9.59496e+06	9.8116e+06	6.86968e+06	1.02432e+07	795652	5.23595e+06	0	0	0	0	0	0	0	0	0	0	1.4422e+06	2.4003e+06	1.71598e+06
817	387.665	260.195	4.65725e+06	89077.2	1.87774e+06	2.28475e+06	1.42957e+07	0	693776	903246	1.76376e+07	7.6867e+07	167100	1.16242e+07	151671	470386	218419	1.27927e+07	424932	6.25746e+06	238590	691797	6.11022e+06	6.1163e+06	5.94662e+06
818	163.528	794.602	4.56709e+06	6.57348e+06	1.34826e+07	4.52516e+07	3.24825e+07	5.56967e+06	2.92024e+07	2.84244e+06	1.75609e+07	7.0092e+07	5.25369e+06	1.70558e+06	2.6532e+06	1.68457e+06	9.19315e+06	3.81637e+07	9.02546e+06	4.05911e+07	1.50182e+07	4.87794e+06	1.73912e+07	1.91727e+07	1.71968e+07
819	176.45	266.137	76368.4	3.4512e+06	520093	458887	0	1.73263e+06	502328	871105	535375	384148	673358	0	0	1.41934e+06	110683	856569	1.73013e+06	638470	2.64094e+06	382346	702246	873019	817652
820	382.105	244.128	1.89681e+06	1.11315e+06	2.94466e+06	4.83976e+06	8.63736e+06	1.16372e+06	2.65973e+06	3.24277e+06	3.39216e+07	3.2797e+07	906303	1.29148e+07	1.41742e+06	0	273365	1.0307e+07	1.80796e+06	5.80417e+06	975719	1.09734e+06	9.48363e+06	9.34989e+06	8.19417e+06
821	172.012	732.549	6.88732e+07	2.89508e+07	9.40261e+07	6.16059e+07	7.76071e+07	1.54689e+07	2.98191e+07	5.9077e+07	2.55449e+08	8.69065e+07	1.64029e+07	1.39434e+08	2.1975e+07	8.36015e+06	1.372e+07	5.62628e+07	4.79764e+07	6.42942e+07	4.46369e+07	9.41812e+06	8.54692e+07	8.11204e+07	8.37711e+07
822	165.435	840.642	99165.5	292139	1.05231e+06	2.25324e+06	1.90549e+06	450121	0	714955	1.78235e+06	2.61095e+06	279053	493264	336500	0	492254	1.59052e+06	831807	1.19104e+06	943393	199638	1.23859e+06	1.09162e+06	1.12225e+06
823	52.1492	90.055	2.29268e+06	897241	2.01225e+06	3.10575e+06	5.34598e+06	1.07156e+06	2.55344e+06	2.66976e+06	2.13517e+07	6.16096e+06	1.60816e+06	7.37507e+06	1.01592e+06	867426	796602	2.65421e+06	1.05427e+06	5.61105e+06	2.6002e+06	1.21881e+06	3.28544e+06	3.43764e+06	3.96917e+06
824	33.4079	165.09	903261	879708	425309	382079	476221	608243	694761	1.11231e+06	5.71234e+06	5.58357e+06	1.68212e+07	9.30547e+06	1.23154e+07	9.13341e+06	8.1059e+06	1.90144e+07	9.55164e+06	8.11418e+06	1.05917e+07	7.63249e+06	6.35853e+06	9.40939e+06	6.10857e+06
825	428.514	465.244	28258.6	0	20989	0	523646	0	0	11982.7	405170	1.37165e+06	0	995416	0	0	0	425766	0	213895	0	0	237513	210574	197835
826	136.786	177.054	3.67337e+07	1.16216e+07	3.66676e+07	1.04187e+07	2.15607e+07	4.2249e+07	1.95006e+07	1.6421e+07	1.2116e+07	2.48061e+07	5.66269e+06	865404	759265	1.12125e+06	946480	1.10249e+06	625504	460190	675350	664176	1.44821e+07	1.45002e+07	1.28274e+07
827	67.6185	315.121	4.91863e+06	3.14854e+06	3.98822e+06	4.83796e+06	5.00641e+06	2.85905e+06	3.63802e+06	0	1.55514e+06	1.97767e+06	2.71224e+06	846205	2.62134e+06	5.05706e+06	3.62193e+06	2.78579e+06	5.43559e+06	1.8773e+06	1.88204e+06	3.14961e+06	3.6423e+06	3.26152e+06	3.44433e+06
828	228.81	154.122	2.41491e+06	1.27467e+06	1.62083e+06	1.52837e+06	534458	1.43073e+06	1.01046e+06	1.09923e+06	2.67118e+06	915075	368017	6.32978e+06	441838	216184	617603	233394	1.13006e+06	3.25461e+06	5.08513e+06	1.08908e+06	1.72394e+06	1.72088e+06	1.36059e+06
829	209.679	675.542	2.01106e+07	7.78938e+06	1.37043e+07	3.03712e+07	3.46312e+07	2.25699e+07	2.70443e+07	2.62783e+07	6.43782e+07	2.81493e+07	8.43921e+06	7.99001e+06	8.23724e+06	3.06238e+06	3.00928e+06	2.37953e+07	1.06071e+07	2.10153e+07	7.83622e+06	3.36254e+06	2.4439e+07	2.12659e+07	1.99141e+07
830	394.854	157.06	1.85668e+07	349603	2.13847e+06	363756	1.44625e+06	2.73773e+06	3.32999e+06	492115	916235	1.65459e+06	90447.4	165795	213339	808543	185540	600124	353994	565103	499004	993029	2.73918e+06	2.1991e+06	3.34682e+06
831	231.381	326.143	3.24821e+06	219953	1.89659e+06	1.75848e+06	25686.5	572664	3.58406e+06	222457	1.09517e+06	1.4463e+06	0	0	0	0	200041	322598	129134	0	388594	0	405953	443422	746265
832	204.989	518.318	2.75084e+07	2.56972e+07	2.03914e+07	1.21485e+07	2.3044e+07	1.62874e+07	1.78517e+07	2.39518e+07	0	0	2.78282e+06	3.84317e+06	2.0356e+06	1.84982e+06	1.11091e+06	872161	1.81395e+06	1.43841e+06	1.79273e+06	2.49637e+06	7.54726e+06	8.2468e+06	6.07927e+06
833	168.369	732.583	4.01491e+06	1.84946e+06	3.7769e+06	4.91293e+06	7.86719e+06	4.03708e+06	6.60927e+06	1.1669e+07	6.33238e+06	6.60217e+06	8.32006e+06	8.79766e+06	4.73102e+06	1.66217e+06	2.45144e+06	3.31707e+06	3.53175e+06	5.9196e+06	3.80213e+06	4.49603e+06	1.19492e+07	1.35024e+06	6.44184e+06
834	223.658	304.164	3.68771e+06	239795	4.32627e+06	2.26386e+06	3.33307e+07	300547	3.84818e+06	1.59706e+06	3.05958e+07	4.22752e+07	207481	1.32792e+07	678722	204179	596167	1.37889e+07	2.75298e+06	9.38212e+06	2.7282e+06	593894	9.62698e+06	9.88629e+06	9.73006e+06
835	407.087	189.086	2.74859e+06	6.89124e+06	6.14885e+06	9.19072e+06	1.07073e+06	4.25726e+06	6.73412e+06	1.1141e+07	5.96894e+06	1.96698e+06	4.30391e+06	3.09931e+06	3.69571e+06	3.02122e+06	1.90594e+06	6.64654e+06	9.09836e+06	7.36182e+06	4.97768e+06	2.26618e+06	5.14964e+06	5.20689e+06	4.87567e+06
836	370.944	74.0603	348124	278026	543141	198787	1.07004e+06	71302.3	357579	796830	2.23385e+06	1.31452e+06	210007	415912	160944	128886	238298	1.31546e+06	130203	589970	226178	350755	529620	869103	698951
837	267.144	592.314	562583	1.46778e+06	1.64307e+06	730634	960058	712105	1.20491e+06	606776	376504	63307.7	80593.4	54825	0	0	0	84923.1	35664.4	144482	0	0	505231	509282	534617
838	393.845	246.18	669680	135496	581121	0	7.29522e+06	83849.1	449922	658833	1.51802e+07	6.47951e+07	69131.5	1.07337e+07	230604	0	70715.5	2.20725e+07	269218	4.19111e+06	1.43473e+06	347200	4.97466e+06	4.6308e+06	4.36002e+06
839	99.3785	209.152	0	0	0	0	0	0	0	0	0	0	2.21468e+07	1.08722e+07	2.5961e+07	9.61527e+06	7.78768e+07	5.67232e+07	1.27991e+07	4.1128e+07	3.12127e+07	1.85702e+07	1.87287e+07	1.5092e+07	1.58962e+07
840	165.386	828.678	1.25521e+06	2.53126e+06	4.55373e+06	1.68943e+07	1.52144e+07	1.11004e+07	1.59616e+07	454615	3.77239e+06	2.48624e+07	2.75146e+06	305504	1.42034e+06	388599	7.61669e+06	1.3693e+07	2.7071e+06	1.32758e+07	5.11595e+06	3.33625e+06	6.66549e+06	8.06157e+06	8.14987e+06
841	234.909	213.074	3.90052e+06	5.92962e+06	4.38634e+06	9.72128e+06	4.29093e+06	3.42514e+06	8.31764e+06	2.28292e+06	3.94825e+06	3.2882e+06	1.57944e+06	1.28022e+06	692561	499673	389038	1.23735e+06	596435	785821	2.40437e+06	848441	2.54733e+06	2.50114e+06	2.41884e+06
842	167.257	772.615	5.46157e+06	2.06367e+07	2.36656e+07	8.8996e+07	6.30976e+07	4.65693e+07	9.61146e+07	6.6719e+06	1.25825e+07	1.26307e+08	2.15298e+07	2.47325e+07	7.33809e+06	5.15656e+06	3.93103e+07	6.96322e+07	1.4257e+07	5.44338e+07	4.1405e+07	2.57507e+07	3.59496e+07	3.95752e+07	4.20778e+07
843	101.006	415.23	0	0	0	272576	0	0	0	321101	0	0	9.85862e+06	1.03583e+07	9.86942e+06	9.35477e+06	7.17924e+06	1.06232e+07	5.28302e+06	1.28059e+07	1.25125e+07	5.26402e+06	5.88655e+06	6.56179e+06	6.20095e+06
844	381.355	76.0395	93586.3	92744.4	232438	139683	677493	13967.8	177493	436412	2.96337e+06	2.93011e+06	40610.6	1.071e+06	73957.9	0	14443.7	1.0548e+06	6934.46	300650	176557	0	618538	639720	607938
845	468.168	262.127	2.73393e+06	2.32058e+06	2.79813e+06	2.072e+06	2.32409e+06	1.91101e+06	1.89309e+06	2.93938e+06	4.11968e+06	2.63064e+06	1.79001e+06	445826	507736	242698	822835	5.85806e+06	733522	1.07485e+06	1.051e+07	1.29004e+06	8.70757e+06	6.31397e+06	6.43972e+06
846	233.098	207.064	1.24778e+07	3.00653e+06	1.84447e+07	3.38306e+06	7.35255e+06	8.47616e+06	5.94742e+06	1.17637e+07	4.48202e+06	1.55781e+07	573138	1.25361e+06	916443	663319	2.26492e+06	616412	1.31904e+06	661059	1.25222e+06	1.68223e+06	5.74892e+06	5.66241e+06	5.68739e+06
847	310.512	260.159	2.82378e+07	1.10126e+06	1.33948e+07	2.52451e+07	4.78697e+07	2.71929e+06	9.41117e+06	5.65794e+06	7.47217e+07	1.97416e+08	1.86636e+06	5.26922e+07	1.2836e+06	240511	387745	9.81597e+07	3.4455e+06	2.66469e+07	9.31008e+06	1.69985e+06	3.42582e+07	3.71253e+07	2.67629e+07
848	142.092	339.121	2.69845e+06	714284	3.31681e+06	685027	954135	2.32664e+06	2.45311e+06	2.17452e+06	1.2241e+06	1.95592e+06	1.58389e+06	223730	565534	424923	1.373e+06	987613	647047	0	807613	980528	1.05043e+06	400163	1.08874e+06
849	438.644	342.138	805370	1.13211e+06	4.10127e+06	2.49774e+06	2.67896e+06	690379	1.33458e+06	2.60185e+06	5.20363e+06	1.27985e+06	319474	495079	295819	1.29343e+06	488476	1.4205e+06	277092	317584	2.57102e+06	821107	6.14812e+06	5.08684e+06	3.29425e+06
850	261.344	306.143	636287	0	1.04955e+06	53201	4.97227e+06	49636.9	663747	556656	6.62434e+06	7.25248e+06	81160.3	4.13371e+06	54356.9	43804.5	38017.9	4.80588e+06	238861	2.76427e+06	775723	62389.5	2.28166e+06	2.35469e+06	2.16461e+06
851	164.665	838.625	585654	1.05773e+06	1.87642e+06	6.11256e+06	5.77824e+06	372466	143113	690507	4.85178e+06	5.23446e+06	764908	653850	639638	283666	1.02085e+06	5.19422e+06	1.38412e+06	4.36895e+06	1.93601e+06	662671	2.29464e+06	2.3227e+06	2.58287e+06
852	163.009	832.579	460299	1.02645e+06	1.7947e+06	2.29475e+06	1.9487e+06	0	386724	543557	6.70676e+06	2.34385e+06	182210	711806	368133	84757.1	412498	1.90659e+06	1.52399e+06	2.19642e+06	1.15617e+06	149405	1.17585e+06	1.516e+06	1.32045e+06
853	29.4049	573.485	405951	782014	500065	243953	383063	229236	348432	560486	1.34516e+06	1.07356e+06	303203	771935	179228	27847.9	42560.3	172940	202586	214265	107224	131351	495946	247476	350931
854	322.82	190.106	1.3605e+06	250861	345161	167476	118004	506383	1.48075e+06	449655	114855	150807	633462	140887	377287	241174	444628	398606	823271	473874	257743	275438	1.06928e+06	789351	815793
855	199.699	203.105	1.01421e+06	1.06503e+06	889412	826030	925296	1.2201e+06	1.71051e+06	338459	410648	711164	387816	278788	262281	180698	173412	359426	270358	277713	614110	244080	525762	473187	627458
856	94.1917	148.06	2.20731e+06	451608	9.50725e+06	3.55595e+06	2.80888e+06	510597	1.75346e+06	1.06134e+06	380676	405341	108235	5.51209e+06	162238	0	46049.2	95328.5	837812	369038	570850	803366	1.61855e+06	1.54318e+06	1.28378e+06
857	164.839	806.566	2.60549e+06	3.47287e+06	5.50454e+06	1.90494e+07	1.21754e+07	1.40351e+06	1.56599e+06	1.75283e+06	1.6518e+07	9.66138e+06	2.71694e+06	2.95689e+06	2.02701e+06	1.92076e+06	2.37145e+06	1.30259e+07	5.38025e+06	1.1579e+07	9.43416e+06	923480	6.05252e+06	6.85264e+06	7.0612e+06
858	216.31	528.305	0	352826	293494	446553	1.25028e+06	0	2.6611e+06	499673	3.94864e+06	5.56398e+06	164178	1.9546e+06	742071	1.25236e+06	466635	733501	1.13648e+06	1.35998e+06	343193	61502	1.16265e+06	103393	1.07849e+06
859	214.16	291.157	0	0	0	46442.2	0	0	0	0	0	0	588173	524936	367053	336900	562964	516853	316298	642804	625904	585906	232366	276962	233552
860	349.331	157.06	2.79804e+07	522094	1.95368e+06	772428	2.21754e+06	6.78287e+06	5.38065e+06	392557	448306	1.19539e+06	176003	171530	196713	413121	166226	248311	150005	295286	296148	142316	4.41395e+06	1.89819e+06	5.35582e+06
861	203.262	787.662	2.39461e+07	1.7685e+07	1.33472e+07	1.54058e+07	2.48451e+07	2.84036e+07	2.28843e+07	1.72976e+07	2.54719e+07	8.88517e+06	8.34635e+06	7.56573e+06	4.33714e+06	3.58329e+06	3.92701e+06	1.13644e+07	7.23548e+06	1.65905e+07	5.50043e+06	5.16454e+06	8.12874e+06	8.93754e+06	7.4571e+06
862	175.485	257.112	1.23663e+07	3.10381e+06	2.46376e+07	2.12068e+07	1.74453e+07	3.76126e+06	3.47241e+06	763102	4.00814e+07	2.40805e+07	3.06846e+07	2.18709e+07	5.98062e+06	7.81437e+06	3.60938e+06	5.10304e+06	2.82421e+06	2.57665e+06	1.2868e+07	1.13063e+07	1.73102e+07	1.72395e+07	1.5787e+07
863	300.321	828.473	488792	403672	401692	298352	428565	401456	520508	358891	0	0	547078	1.42253e+06	488135	433302	177183	452690	434847	335431	771573	898181	586079	604838	443715
864	250.078	411.235	0	68025.2	0	23154.7	21626.8	22805.1	122671	10750	0	0	1.03928e+06	1.67483e+06	979004	537958	540947	1.33435e+06	548336	1.24121e+06	1.63006e+06	386121	331797	363182	332889
865	137.209	483.425	0	0	0	0	0	0	0	0	42610.1	0	5.27088e+06	0	114351	43092.5	5.29992e+06	3.21794e+06	6.67505e+06	7.65253e+06	113910	0	1.06687e+06	1.17021e+06	1.39071e+06
866	381.976	215.138	2.99992e+06	898650	709480	942039	281249	570092	759552	183041	1.28331e+07	522687	206847	186957	229196	329382	345559	276775	245692	358358	228056	729296	1.33333e+06	1.20382e+06	1.64554e+06
867	202.358	799.664	2.57431e+06	0	1.09326e+06	1.45876e+06	2.86645e+06	3.21119e+06	5.07761e+06	807337	2.86859e+06	1.93618e+06	762299	826273	389944	266950	312470	1.23583e+06	693406	2.81171e+06	623870	262111	928084	961289	558037
868	250.904	330.262	0	0	0	0	0	0	0	0	0	0	4.92693e+06	447699	519222	3.6404e+06	2.82502e+06	3.48013e+06	4.40813e+06	1.52418e+06	1.6683e+06	528120	3.16262e+06	2.99423e+06	2.03479e+06
869	110.443	285.168	0	0	67668.4	53620.3	47481.9	0	0	0	0	0	1.76529e+06	3.51933e+06	2.87766e+06	3.40753e+06	2.15637e+06	831040	2.52583e+06	1.69603e+06	2.98624e+06	2.42629e+06	1.53306e+06	1.23694e+06	1.17883e+06
870	320.304	310.138	1.23714e+06	76312.7	572670	1.13493e+06	3.11304e+06	395567	742142	889959	3.52397e+06	7.12368e+06	302845	3.64063e+06	179121	59091.6	679768	7.70436e+06	438817	3.08224e+06	2.19188e+06	436692	1.47948e+06	3.40024e+06	1.45449e+06
871	192.253	385.163	5.01085e+06	5.29964e+06	3.77699e+06	2.83854e+06	913343	4.24283e+06	4.43574e+06	2.04203e+06	3.15389e+06	3.95216e+06	969274	591978	539746	588466	516104	541637	368328	834052	502030	146325	3.36969e+06	3.2715e+06	2.54657e+06
872	195.859	195.1	869936	642399	872415	628258	956749	932345	845229	1.07457e+06	892428	2.40036e+06	2.40898e+06	2.48316e+06	1.97378e+06	7.10329e+06	4.60123e+06	5.36286e+06	8.51263e+06	1.0086e+06	2.79298e+06	2.46638e+06	2.02396e+06	1.84795e+06	1.53542e+06
873	380.103	196.096	484524	1.03093e+06	1.12178e+06	260402	390841	631835	677646	407018	1.62669e+06	517753	1.94345e+06	1.65509e+06	1.22327e+06	611930	2.05508e+06	3.27849e+06	1.04413e+06	1.6246e+06	2.68611e+06	1.41905e+06	1.22694e+06	1.14705e+06	1.31125e+06
874	33.4188	351.214	0	0	0	0	0	514837	0	0	0	432008	1.64498e+07	1.42244e+07	9.73864e+06	8.78178e+06	1.34235e+07	1.99034e+07	1.14608e+07	1.44363e+07	1.18954e+07	1.02471e+07	8.05377e+06	7.88692e+06	7.96694e+06
875	31.5862	209.116	0	79674.5	0	240580	122479	0	56143.9	0	1.14967e+06	955133	3.25587e+06	5.07915e+06	1.19017e+06	1.40498e+06	4.47753e+06	5.87604e+06	3.28395e+06	4.6892e+06	3.74511e+06	3.65259e+06	3.13757e+06	3.21277e+06	2.76885e+06
876	165.008	768.584	1.21035e+07	1.2857e+07	1.96728e+07	4.49136e+07	3.85697e+07	1.21621e+07	3.96361e+07	1.14396e+07	2.7623e+07	6.87524e+07	6.1045e+06	6.63009e+06	4.84582e+06	2.76591e+06	1.09524e+07	3.38953e+07	1.25092e+07	3.52542e+07	1.7592e+07	6.49019e+06	2.07807e+07	2.31353e+07	2.29049e+07
877	141.7	401.157	1.71245e+07	2.08994e+07	1.3363e+07	1.64606e+07	1.17141e+07	2.22958e+07	1.97562e+07	1.50595e+07	1.13762e+07	7.64623e+06	1.3219e+08	4.02771e+07	3.96277e+07	6.14685e+07	1.13276e+08	7.96606e+07	6.53421e+07	1.97433e+07	9.03371e+07	7.72382e+07	4.16489e+07	4.24581e+07	4.10381e+07
878	379.15	234.107	458879	169769	406837	752145	764139	884876	167639	294439	1.34502e+06	3.44706e+06	85919.3	3.50235e+06	22081	111904	50332.4	1.477e+06	114288	731788	158308	0	821975	897436	752122
879	216.043	530.32	106720	120334	312727	1.23672e+06	2.23621e+06	107210	2.71207e+06	670538	4.57896e+06	8.58485e+06	1.08239e+06	2.58088e+06	1.1843e+06	935086	353817	1.35543e+06	1.40938e+06	1.70608e+06	2.42124e+06	1.77873e+06	1.46189e+06	1.78784e+06	1.65441e+06
880	337.251	221.112	628422	0	1.12989e+06	815794	3.39184e+06	82709.9	2.52998e+06	656999	1.09459e+07	1.48584e+07	295160	1.61896e+07	489775	0	0	1.06644e+07	1.00961e+06	4.34106e+06	1.2533e+06	0	4.28147e+06	3.89815e+06	3.97464e+06
881	229.59	434.199	1.25467e+06	709862	3.3738e+06	1.33983e+06	1.10784e+06	1.784e+06	1.95509e+06	1.31409e+06	1.23305e+06	2.20882e+06	104580	234833	38459.5	0	138091	115089	150006	49806.5	136378	50878.8	1.09398e+06	1.00672e+06	977767
882	56.146	441.199	3.99814e+07	2.47667e+08	1.96215e+07	5.31591e+07	2.71334e+07	4.19732e+07	3.53491e+07	9.22964e+06	7.61425e+07	3.55368e+08	331232	0	59590.5	0	123690	302079	63423.7	293935	173679	46788.4	2.57372e+07	2.76828e+07	2.91393e+07
883	449.685	218.149	232402	148327	202456	283013	2.6495e+06	255374	226730	261972	5.03401e+06	2.19157e+07	178471	2.85458e+07	174635	468120	105589	1.10255e+07	165094	3.54476e+06	1.07683e+06	508810	3.64467e+06	3.66404e+06	3.30272e+06
884	203.184	785.649	7.11455e+06	2.16509e+06	2.78816e+06	5.51972e+06	7.3541e+06	7.38944e+06	9.75215e+06	2.68191e+06	6.89812e+06	5.64999e+06	1.4838e+06	1.30527e+06	623349	710854	1.09422e+06	2.62583e+06	1.91723e+06	5.31152e+06	1.6811e+06	914380	2.09511e+06	2.62507e+06	2.06303e+06
885	358.111	146.08	1.4476e+06	1.33639e+06	1.30138e+06	1.05989e+06	3.11961e+06	970686	1.33421e+06	2.8151e+06	1.49322e+06	1.25268e+06	614262	293329	379430	496698	859890	946109	604235	846789	600053	540366	778472	780077	1.41258e+06
886	100.965	653.461	0	0	0	0	0	0	0	0	55890	0	3.01089e+06	420727	1.75347e+06	1.90835e+06	1.19966e+06	3.06856e+06	819027	2.9426e+06	2.68224e+06	313216	1.64662e+06	1.29261e+06	1.19196e+06
887	168.375	784.58	1.50641e+08	6.07786e+07	1.42351e+08	1.35688e+08	1.54301e+08	1.97996e+07	2.59645e+07	8.23892e+07	2.47693e+08	1.29575e+08	2.95679e+07	1.09688e+08	8.83819e+07	2.51771e+07	3.67168e+07	1.31497e+08	1.59899e+08	1.48926e+08	8.00387e+07	3.48546e+07	1.22346e+08	1.23664e+08	1.21611e+08
888	162.62	820.618	1.33089e+06	1.02913e+06	2.79378e+06	1.07698e+07	8.06191e+06	1.44622e+06	6.86551e+06	342434	3.43449e+06	1.87043e+07	801061	85817.2	436760	95884.2	2.2609e+06	7.31294e+06	2.05595e+06	9.64839e+06	2.78044e+06	973217	3.6808e+06	4.0805e+06	3.75123e+06
889	103.003	195.064	9.38584e+06	3.35597e+06	1.09575e+07	3.47216e+06	5.01729e+06	6.01039e+06	8.51338e+06	6.06267e+06	7.13215e+06	7.22896e+06	2.51536e+06	3.77996e+06	2.56396e+06	4.34755e+06	3.23995e+06	3.28883e+06	2.51268e+06	2.35162e+06	3.34237e+06	2.33124e+06	3.1473e+06	2.87193e+06	3.27773e+06
890	279.322	149.059	8.23988e+06	4.31834e+06	1.11607e+07	1.24979e+07	8.65489e+06	6.01813e+06	1.19388e+07	4.80851e+06	1.18361e+07	1.74768e+07	1.30611e+06	3.62287e+06	1.01657e+06	0	354409	462273	1.22322e+06	264465	2.00777e+06	358283	4.8944e+06	5.48327e+06	5.41544e+06
891	423.748	224.09	280475	189144	445077	192515	170656	550880	327571	582622	752142	324709	959578	1.23339e+06	486756	172211	499628	3.03238e+06	357126	1.12382e+06	1.15241e+06	461835	762445	631216	713996
892	169.265	744.587	5.78161e+07	1.0575e+08	9.83462e+07	1.18334e+08	1.24777e+08	1.05785e+08	1.63103e+08	1.04803e+08	1.20146e+08	2.21465e+08	4.35185e+07	7.43385e+07	4.77696e+07	2.74993e+07	4.84428e+07	1.10204e+08	5.42736e+07	7.90273e+07	9.15259e+07	6.34462e+07	1.13468e+08	9.55628e+07	1.01505e+08
893	472.224	221.112	1.63052e+06	1.58192e+06	1.559e+06	2.11482e+06	1.48807e+06	2.33118e+06	2.39461e+06	1.79722e+06	1.0847e+06	1.69803e+06	142585	179684	186801	169716	155439	218234	80104.6	117904	267855	80329.8	1.31048e+06	1.23956e+06	1.29348e+06
894	165.488	842.655	282516	386941	1.59053e+06	1.41015e+06	1.81502e+06	391711	269145	2.0067e+06	2.27522e+06	2.50793e+06	438502	1.29953e+06	494041	110908	353723	1.6225e+06	902955	1.40118e+06	770072	435867	1.54235e+06	1.07765e+06	1.50723e+06
895	169.595	768.55	4.43671e+06	1.12797e+06	2.70947e+06	2.75138e+06	1.61268e+06	3.8023e+06	7.37466e+06	1.64878e+06	3.99306e+06	7.97775e+06	1.30764e+06	4.20671e+06	2.4097e+06	311563	902800	7.66662e+06	1.90497e+06	2.82829e+06	2.4949e+06	1.40963e+06	3.48389e+06	3.24477e+06	2.92467e+06
896	278.21	292.128	1.14729e+06	257010	572848	990725	1.51873e+06	509508	993084	391250	2.39891e+06	2.51768e+06	85154.5	4.33578e+06	521395	657152	3.21335e+06	1.42204e+06	460445	2.7463e+06	421896	0	1.14878e+06	700593	1.43247e+06
897	137.141	315.087	1.14443e+06	978156	4.06929e+06	1.2596e+06	2.41882e+06	1.1635e+06	933365	642600	1.23703e+06	693547	1.41888e+06	50252.5	191345	167172	1.23982e+06	973402	625561	36434.5	507082	823722	856776	890490	1.00298e+06
898	68.2681	540.532	6.47016e+06	280516	2.41922e+06	2.15989e+06	6.55654e+06	4.04136e+06	2.32639e+06	5.12273e+06	7.95957e+06	4.49764e+06	1.15843e+06	3.15327e+06	1.46835e+06	0	241212	3.17464e+06	1.08867e+06	2.75528e+06	1.99899e+06	1.8061e+06	3.39863e+06	3.34861e+06	3.8866e+06
899	165.122	754.568	4.58569e+06	5.80868e+06	1.28981e+07	2.49825e+07	3.43107e+07	1.27415e+06	1.42394e+07	1.07758e+07	3.68907e+07	4.95394e+07	9.06688e+06	2.97876e+07	6.3497e+06	2.7021e+06	9.65325e+06	3.04457e+07	1.18575e+07	3.13759e+07	1.07516e+07	9.55518e+06	1.58183e+07	2.25781e+07	2.00455e+07
900	50.1493	355.116	9.50177e+06	9.48437e+06	1.21103e+07	8.77509e+06	9.76168e+06	1.18088e+07	1.36915e+07	6.73512e+06	6.24148e+06	6.87392e+06	701033	133723	584206	860197	488108	0	1.73575e+06	189595	0	195671	2.51322e+06	5.04396e+06	4.48364e+06
901	404.62	336.086	1.73217e+06	615648	834902	289495	1.27062e+06	2.68248e+06	323003	1.70475e+06	2.41552e+06	3.59786e+06	23272	2.31835e+06	764810	458459	227592	651091	947565	1.19975e+06	245490	47837.1	1.40589e+06	1.46938e+06	1.35878e+06
902	222.091	496.337	9.88432e+07	1.93004e+08	4.74731e+07	4.9959e+07	3.99887e+07	2.33458e+08	9.662e+07	5.19794e+07	8.33457e+07	5.8574e+07	1.13188e+07	3.94389e+07	1.53694e+07	1.20575e+07	8.20726e+06	2.69519e+07	1.50853e+07	2.66995e+07	2.77979e+07	8.21011e+06	5.90954e+07	5.72705e+07	5.76373e+07
903	202.599	789.672	4.40699e+06	4.86204e+06	3.12983e+06	3.30273e+06	5.03157e+06	4.10562e+06	3.56233e+06	4.26944e+06	3.78426e+06	1.16582e+06	1.20101e+06	678070	507680	440251	804993	2.1064e+06	985802	5.21366e+06	1.07764e+06	2.16106e+06	892549	1.08999e+06	1.32435e+06
904	427.961	248.112	3.72766e+07	1.35259e+07	5.13976e+07	1.60434e+07	2.20278e+07	4.79848e+07	2.13673e+07	3.49858e+07	8.78527e+07	4.15173e+07	2.77163e+06	3.45462e+06	1.36329e+06	1.12205e+06	2.75727e+06	5.71093e+07	1.19792e+06	2.04662e+06	8.72015e+07	7.68591e+06	4.19575e+07	3.53846e+07	4.03817e+07
905	210.595	325.09	2.3068e+06	2.78117e+06	3.94794e+06	674280	1.56536e+06	2.25619e+06	3.18335e+06	1.37796e+06	298092	4.54378e+06	0	131448	391475	454962	46986.5	95391.3	123363	28310.9	333354	243996	1.45678e+06	1.17607e+06	1.5259e+06
906	178.114	753.444	1.81501e+06	1.03118e+06	890121	1.02452e+06	1.40541e+06	1.2661e+06	1.23754e+06	1.43774e+06	0	0	237307	1.09969e+06	258674	263503	104813	135770	189477	42158	668848	573881	721888	768709	1.16852e+06
907	214.717	522.354	4.35911e+07	8.96927e+07	6.7141e+07	2.55896e+07	9.15466e+07	6.54827e+07	2.4575e+08	2.50746e+08	8.62753e+07	1.08221e+08	6.7189e+06	6.31621e+07	2.21357e+07	2.42447e+06	5.13312e+06	4.51388e+07	5.46512e+07	7.38556e+07	1.96204e+07	7.8384e+06	8.16892e+07	1.22212e+08	1.06685e+08
908	60.7811	174.075	942039	1.7366e+06	807672	517251	943257	312744	1.50112e+06	1.89582e+06	844091	1.49616e+06	3.77502e+06	6.67569e+06	2.03476e+06	3.54151e+06	2.44398e+07	4.31019e+06	1.57623e+07	4.07614e+06	1.33728e+06	8.63061e+06	5.04856e+06	5.76947e+06	5.63288e+06
909	31.37	195.137	9.63673e+06	1.15131e+07	1.30277e+07	1.29307e+07	9.84118e+06	1.20189e+07	1.20037e+07	1.53816e+07	1.00175e+07	5.62925e+06	1.52677e+07	3.93848e+06	3.75328e+06	1.28922e+07	1.81706e+07	1.39698e+07	1.94006e+07	2.58327e+06	6.27236e+06	7.35537e+06	1.1808e+07	1.20931e+07	1.26652e+07
910	55.2762	507.365	7.06668e+06	6.53207e+06	7.07972e+06	6.08596e+06	5.84225e+06	5.8216e+06	6.47903e+06	8.78076e+06	1.0986e+07	2.1926e+07	8.79281e+06	1.77688e+06	2.1731e+06	4.6228e+06	1.00232e+07	5.47248e+06	1.0911e+07	1.22638e+07	3.47388e+06	2.49461e+06	6.49884e+06	7.61475e+06	7.2752e+06
911	90.6936	117.11	1.08873e+06	83093.7	185381	167174	0	2.99819e+06	245990	125655	202333	392551	653998	1.07284e+06	329534	3.65988e+06	716112	841367	634571	1.81868e+06	894683	1.26752e+06	739940	641069	320312
912	192.363	411.163	6.50209e+06	3.60894e+06	7.39508e+06	2.78728e+06	2.80564e+06	5.05767e+06	4.08133e+06	3.50343e+06	3.5085e+06	3.75718e+06	553489	2.30576e+06	75497.5	186141	274796	305719	111684	624297	273997	302212	2.85671e+06	3.14764e+06	2.8049e+06
913	31.0887	261.183	516141	485173	491720	236745	325980	413393	378591	678760	295885	807045	1.65666e+06	1.7508e+06	2.485e+06	8.51324e+06	5.69748e+06	3.52418e+06	4.37562e+06	2.1151e+06	3.21305e+06	3.92773e+06	2.69603e+06	2.21606e+06	2.38741e+06
914	182.275	345.167	0	236461	0	100213	0	0	0	0	0	0	7.53774e+06	1.83564e+06	2.85678e+06	4.63572e+06	1.06276e+07	6.53601e+06	3.92351e+06	1.4003e+06	6.75953e+06	764947	987286	621148	1.43246e+06
915	163.799	872.704	621238	714325	2.34513e+06	1.28173e+06	2.60573e+06	495072	952098	4.31917e+06	8.08733e+06	2.67612e+06	831667	3.72408e+06	457288	58815.7	218791	1.75883e+06	1.20318e+06	1.61547e+06	620595	391036	2.00577e+06	2.11318e+06	1.87344e+06
916	53.7559	291.194	1.25505e+06	1.19168e+06	1.52742e+06	2.84692e+06	1.59838e+06	2.43781e+06	2.12335e+06	701760	1.44916e+06	845793	7.65957e+06	1.0858e+07	8.4615e+06	6.02666e+06	1.00506e+07	1.33413e+07	7.22175e+06	1.37636e+07	8.70551e+06	5.78413e+06	7.83239e+06	6.77392e+06	7.56198e+06
917	158.483	211.095	1.26951e+07	5.19537e+06	1.66549e+07	1.22565e+06	1.0399e+07	5.3979e+06	8.0469e+06	8.39095e+06	6.31518e+06	2.07445e+07	2.62094e+06	3.79421e+06	3.79195e+06	3.23748e+06	3.42785e+06	3.47262e+06	1.92133e+06	1.58676e+06	4.52004e+06	4.84957e+06	6.52959e+06	7.60233e+06	6.37718e+06
918	37.1086	744.579	1.59964e+07	1.29796e+07	1.45056e+07	1.81118e+07	1.29744e+07	1.50862e+07	1.57258e+07	1.56591e+07	2.00765e+07	2.08984e+07	1.90998e+06	1.4121e+06	785085	829547	1.59557e+06	2.55651e+06	1.91183e+06	2.8617e+06	1.19003e+06	1.65728e+06	9.14384e+06	6.29003e+06	8.70247e+06
919	390.2	310.111	3.00963e+06	437952	1.37773e+06	2.03186e+07	2.83175e+06	2.17922e+06	6.57245e+06	856849	614500	6.84691e+06	3.65106e+06	1.01298e+06	216392	715195	778912	1.83359e+06	129227	371342	636595	86347.5	3.14783e+06	3.16485e+06	3.28236e+06
920	179.007	169.049	3.23068e+06	1.95313e+06	5.45438e+06	2.11781e+06	1.7818e+06	4.58023e+06	3.66787e+06	3.20253e+06	2.01132e+06	3.78983e+06	0	0	0	190954	0	0	0	0	0	0	1.9881e+06	1.9222e+06	1.98938e+06
921	162.811	822.634	1.12278e+06	1.18835e+06	4.63236e+06	1.69601e+07	1.29194e+07	2.53747e+06	8.87085e+06	569910	4.17155e+06	2.6111e+07	1.56362e+06	204437	761354	152585	3.36361e+06	1.12407e+07	3.41221e+06	1.44269e+07	3.90632e+06	1.67472e+06	5.55717e+06	5.69108e+06	5.86573e+06
922	128.17	327.157	0	0	0	0	0	0	0	524927	94123.1	0	3.23716e+06	3.74188e+06	3.9337e+06	3.22461e+06	1.46138e+06	713916	1.43167e+06	1.64392e+06	1.63841e+06	1.59589e+06	368872	495931	533014
923	187.04	293.137	7.44605e+06	3.52851e+06	1.47824e+07	3.79684e+06	2.66262e+06	4.35127e+06	8.87533e+06	3.09232e+06	2.80251e+06	3.58959e+06	139929	0	0	0	0	43458.9	0	0	0	0	3.60506e+06	3.4339e+06	3.70143e+06
924	468.648	127.038	556501	1.17283e+06	1.40169e+07	6.81605e+06	4.50224e+06	1.00663e+06	408312	3.91935e+06	3.91275e+06	3.27727e+06	1.25882e+06	7.48408e+06	1.77286e+06	137077	326741	7.54302e+06	0	0	3.72336e+06	3.79946e+06	4.81842e+06	4.78177e+06	5.16381e+06
925	167.49	714.538	985475	1.44713e+06	5.24086e+06	1.7709e+06	5.59403e+06	1.05043e+06	3.96213e+06	3.47271e+06	2.39124e+06	1.06344e+06	3.86816e+06	2.3589e+06	2.78644e+06	2.01258e+06	1.41375e+06	3.19243e+06	1.27177e+06	3.63517e+06	2.63277e+06	2.02772e+06	3.4559e+06	3.24459e+06	4.14995e+06
926	205.604	677.554	4.25833e+06	1.69674e+06	1.56091e+06	1.5393e+06	5.9476e+06	3.29995e+06	3.02145e+06	2.78757e+06	9.37615e+06	2.46724e+06	928979	716658	487895	328804	118488	1.47028e+06	1.19483e+06	2.40733e+06	556534	368081	1.17512e+06	1.16795e+06	940017
927	224.585	762.525	1.40533e+06	2.06443e+06	1.47754e+06	452428	4.07774e+06	337644	237674	3.80936e+06	1.01281e+07	4.48576e+06	225700	2.66511e+06	278078	1.00811e+06	425938	837220	254460	301024	638462	213134	2.56168e+06	2.15985e+06	2.4831e+06
928	149.894	786.601	203134	358548	577466	1.31616e+06	1.25347e+06	0	188204	165814	2.10004e+06	1.39082e+06	208571	0	51141.1	0	173573	372100	333730	335043	0	0	328213	485618	455576
929	162.863	896.705	0	59945.9	257306	644656	297996	0	0	468210	2.8698e+06	888936	0	363600	52026.8	0	0	405519	253481	247399	219192	0	387264	457069	442669
930	168.322	786.595	2.02672e+08	1.91455e+08	3.04842e+08	3.08646e+08	3.65377e+08	7.59099e+07	6.50086e+07	1.96276e+08	5.54405e+08	3.1706e+08	7.68662e+07	2.37273e+08	1.92029e+08	5.39121e+07	8.89173e+07	2.98645e+08	3.01697e+08	2.83388e+08	2.05026e+08	8.292e+07	2.73039e+08	2.69013e+08	2.76757e+08
931	219.169	887.561	0	50034.5	465306	1.75986e+06	1.48883e+06	73899	0	0	920193	2.72074e+06	266269	0	269259	57790.4	473869	1.22102e+06	285947	1.3337e+06	563871	383318	757193	1.03569e+06	695893
932	151.249	225.147	5.92254e+06	2.2609e+06	7.75048e+06	2.85079e+06	4.9882e+06	4.21405e+06	4.26374e+06	4.54056e+06	2.65085e+06	4.8179e+06	2.08653e+06	4.06241e+06	1.55098e+06	1.19206e+06	3.51494e+06	2.44487e+06	2.05193e+06	2.86084e+06	4.40125e+06	2.09125e+06	1.92782e+06	1.74641e+06	3.13659e+06
933	157.347	197.08	1.84129e+07	1.34621e+07	2.19486e+07	1.0731e+07	1.47675e+07	1.27122e+07	1.33515e+07	1.50981e+07	1.07046e+07	9.54922e+06	7.81075e+06	4.56692e+06	1.25869e+07	1.22501e+07	9.59802e+06	4.68343e+06	1.87753e+07	3.45418e+06	7.91971e+06	1.30822e+07	1.04351e+07	1.03512e+07	9.91522e+06
934	224.102	347.147	0	58750.4	0	0	33827.5	0	52139.9	14791	0	0	564894	0	801544	2.48675e+06	2.74731e+06	2.41166e+06	104701	243801	235527	1.76513e+06	531327	511513	588464
935	165.965	726.538	755704	3.38308e+06	2.72085e+07	2.03087e+07	1.25326e+07	0	4.19313e+06	2.26924e+07	4.54945e+07	5.57255e+07	8.1208e+06	4.13804e+07	1.38571e+07	3.61932e+06	7.88529e+06	2.31471e+07	1.45054e+07	1.007e+07	1.43854e+07	2.43962e+06	2.11466e+07	2.26623e+07	2.40214e+07
936	38.6857	155.106	1.28632e+06	545621	613276	462057	489957	618857	732607	534362	374827	526506	1.24328e+07	1.85868e+07	7.68984e+06	1.25134e+07	1.32829e+07	1.15761e+07	6.14837e+06	7.96017e+06	2.00021e+07	8.1803e+06	3.9483e+06	3.47896e+06	5.61814e+06
937	38.6128	141.09	900276	204961	482579	496164	470482	689144	706686	391061	221979	160715	1.11486e+07	1.23406e+07	6.45675e+06	8.00105e+06	1.28639e+07	1.71292e+07	4.83683e+06	9.71934e+06	1.4526e+07	7.97507e+06	4.59781e+06	5.67853e+06	4.18931e+06
938	205.936	729.587	4.39754e+06	1.57015e+06	3.29717e+06	5.84235e+06	5.44526e+06	3.23646e+06	7.81666e+06	2.26241e+06	5.76738e+06	2.03568e+06	1.17624e+06	746050	795986	197205	370159	1.65365e+06	1.38086e+06	3.70352e+06	764567	0	2.07692e+06	2.17222e+06	1.70871e+06
939	36.9706	784.575	3.62199e+06	2.7474e+06	2.66615e+06	5.04004e+06	6.63174e+06	3.44263e+06	1.8542e+06	4.47936e+06	1.19161e+07	7.73746e+06	654087	4.66882e+06	2.86049e+06	2.77425e+06	1.1586e+06	3.17896e+06	2.49043e+06	2.23513e+06	2.6696e+06	3.5458e+06	4.10435e+06	4.40807e+06	3.47651e+06
940	141.581	247.095	2.53591e+06	2.85491e+06	1.36557e+06	2.67318e+06	1.37008e+06	3.90542e+06	2.64694e+06	2.11535e+06	1.24126e+06	1.16262e+06	1.4799e+07	4.2316e+06	4.32293e+06	6.66412e+06	1.19678e+07	9.03993e+06	7.07619e+06	2.23518e+06	9.77717e+06	8.10262e+06	4.91287e+06	4.84498e+06	5.08716e+06
941	99.4695	317.158	0	437984	0	0	0	0	131589	0	0	0	1.25549e+06	3.43349e+06	2.68963e+06	3.07986e+06	1.73264e+06	1.16616e+06	2.21072e+06	1.09378e+06	3.02775e+06	2.2884e+06	1.61045e+06	2.41328e+06	1.5089e+06
942	389.217	228.121	28088.5	246617	215758	174963	171055	0	99769.6	0	0	86339.8	101002	0	233851	345221	6.02921e+07	422029	48812.3	127494	108495	669265	1.6701e+06	1.71793e+06	1.98331e+06
943	49.3987	387.142	2.05088e+07	1.94953e+07	1.27025e+07	1.78273e+07	2.75391e+07	2.00143e+07	2.39175e+07	1.25072e+07	1.61502e+07	1.512e+07	1.06738e+06	202205	1.12486e+06	1.72776e+06	1.37433e+06	0	1.6616e+06	0	493781	243137	1.0934e+07	6.83494e+06	7.31315e+06
944	114.206	160.096	2.58966e+08	5.18482e+07	8.6106e+07	7.98347e+07	2.45095e+07	1.19761e+07	1.21108e+08	2.24486e+07	4.75214e+07	2.21135e+08	2.84892e+06	1.17335e+07	3.93227e+06	8.07812e+06	9.95306e+06	1.28852e+07	2.09258e+06	1.83925e+06	2.31461e+07	1.64822e+06	6.0321e+07	5.63896e+07	5.69975e+07
945	161.277	818.602	388802	1.03534e+06	1.44072e+06	4.07823e+06	3.11345e+06	390839	3.52159e+06	153749	1.99818e+06	8.08858e+06	176270	0	64212.3	0	873294	4.09727e+06	872971	4.80508e+06	1.53619e+06	257881	2.04978e+06	1.6436e+06	1.49289e+06
946	206.814	731.601	4.52698e+07	2.42816e+07	2.95866e+07	3.22373e+07	5.00137e+07	3.38677e+07	4.29707e+07	3.67768e+07	7.65275e+07	1.15356e+07	1.61779e+07	1.31744e+07	1.0517e+07	5.10034e+06	3.86601e+06	2.06238e+07	1.18532e+07	2.32817e+07	5.81785e+06	7.32907e+06	2.17192e+07	2.1706e+07	1.68706e+07
947	125.505	162.075	1.63028e+07	1.95462e+07	5.08887e+07	1.11585e+08	4.22202e+07	1.02637e+08	1.93717e+07	2.70098e+07	4.34702e+07	6.95905e+07	6.09504e+06	1.92908e+07	1.49164e+07	7.37632e+06	2.44586e+07	8.37819e+06	1.01483e+07	6.63856e+06	3.11952e+07	1.40985e+07	3.69698e+07	1.57631e+07	3.64104e+07
948	201.279	355.116	9.49999e+06	4.53316e+06	7.52078e+06	1.50302e+06	5.56284e+06	1.00615e+07	8.34341e+06	5.58299e+06	3.72283e+06	4.31282e+06	0	0	0	0	49377.8	0	0	0	0	27066.6	3.09683e+06	3.78261e+06	2.15329e+06
949	34.6664	293.209	62961	1.18009e+06	1.3883e+06	731118	1.20212e+06	1.26436e+06	1.65808e+06	1.86742e+06	0	1.69266e+06	1.79111e+07	1.78016e+07	1.41948e+07	2.52344e+07	2.61954e+07	2.39226e+07	2.02202e+07	1.91617e+07	1.84788e+07	1.78442e+07	1.27315e+07	1.25733e+07	1.27371e+07
950	40.0444	185.116	291761	199853	437480	281260	347068	129476	307684	527821	0	70528	6.92236e+06	1.34816e+07	6.70804e+06	8.73824e+06	8.82548e+06	7.12009e+06	4.54046e+06	5.54154e+06	1.48701e+07	7.67473e+06	3.71794e+06	2.81233e+06	3.07892e+06
951	196.802	191.105	1.65981e+07	2.93933e+07	7.02693e+06	2.01699e+07	6.57559e+06	8.80409e+06	1.24181e+07	4.69147e+06	7.49296e+06	1.15183e+07	1.67318e+06	715239	1.05502e+06	572362	1.61382e+06	1.43508e+06	904636	2.85984e+06	1.11132e+06	752983	6.41842e+06	5.01577e+06	6.2403e+06
952	163.048	898.722	296500	409346	802638	1.67471e+06	1.59453e+06	58642.5	0	1.13866e+06	8.46283e+06	1.80551e+06	142451	1.43705e+06	204396	0	101792	1.2591e+06	639973	1.03776e+06	294269	73497	1.11021e+06	1.33219e+06	1.29574e+06
953	163.95	812.606	1.18301e+06	7.00256e+06	2.77915e+06	1.13617e+07	9.42065e+06	334783	964474	5.58244e+06	5.10416e+06	9.79293e+06	2.61628e+06	2.31225e+06	3.39131e+06	1.35637e+06	3.46783e+06	8.28222e+06	4.35388e+06	8.48984e+06	4.61396e+06	940875	1.01312e+07	5.16487e+06	9.18594e+06
954	469.318	504.19	18258.6	128725	2.3265e+06	750645	690627	120688	0	505045	593681	652950	143501	1.27617e+06	320941	20584.9	0	1.44869e+06	0	26160.3	681689	847543	865183	758947	835412
955	164.129	870.688	578694	525023	2.18078e+06	1.41906e+06	2.13011e+06	695094	107694	3.3822e+06	6.26114e+06	2.08699e+06	741992	2.29375e+06	368289	42543.1	474641	1.79774e+06	1.30188e+06	1.38925e+06	700991	55030.8	1.08756e+06	1.6507e+06	718826
956	163.142	834.594	1.23259e+06	2.69439e+06	2.27141e+06	1.23696e+07	6.98833e+06	446269	1.17952e+06	715729	7.81681e+06	6.37696e+06	1.08575e+06	638270	768300	477275	1.16352e+06	7.77472e+06	1.80367e+06	5.49119e+06	3.91684e+06	672904	2.81412e+06	3.46284e+06	2.87497e+06
957	163.809	836.609	955218	1.6197e+06	2.46899e+06	9.38378e+06	7.81963e+06	279761	852922	819165	7.69457e+06	7.78856e+06	909706	957834	693888	315859	1.22141e+06	6.10245e+06	1.97743e+06	5.05531e+06	2.81897e+06	506754	3.24553e+06	3.31894e+06	2.9426e+06
958	107.3	299.146	1.36523e+06	1.81585e+06	2.15562e+06	1.36585e+06	1.75677e+06	1.86098e+06	2.93016e+06	222420	989333	581451	3.95723e+06	4.80575e+06	3.54797e+06	3.39124e+06	2.23383e+06	3.44661e+06	3.35442e+06	3.06864e+06	3.83953e+06	3.1812e+06	2.0242e+06	2.13657e+06	2.19131e+06
959	50.6622	155.106	1.26816e+06	542713	515562	417612	886371	551224	439494	410610	0	639232	6.2961e+06	5.62904e+06	3.96199e+06	8.75584e+06	8.04497e+06	7.49547e+06	4.40929e+06	5.09776e+06	5.04882e+06	5.87942e+06	4.03451e+06	3.57089e+06	3.98324e+06
960	164.839	810.596	1.54177e+07	1.24348e+07	2.66631e+07	7.21647e+07	5.44109e+07	4.89558e+06	5.76536e+06	1.25364e+07	6.05065e+07	5.08385e+07	9.54254e+06	1.5184e+07	1.19998e+07	6.01627e+06	1.27086e+07	6.21713e+07	2.18069e+07	4.90292e+07	2.8644e+07	6.06305e+06	2.90507e+07	2.92102e+07	2.97989e+07
961	179.784	359.132	1.30772e+06	5.10159e+06	5.86279e+06	5.6549e+06	2.19132e+06	5.08076e+06	4.93109e+06	2.35201e+06	2.17859e+06	2.84221e+06	93544.8	0	0	74376.4	133539	32947	104875	84217.9	0	51995.6	1.92608e+06	1.77592e+06	1.91456e+06
962	218.711	524.369	1.24183e+08	1.2455e+08	3.6463e+07	2.88662e+07	4.45278e+07	2.86901e+08	1.19378e+07	3.78081e+07	9.57503e+07	4.98489e+07	6.20356e+06	3.03702e+06	1.22755e+07	3.96454e+06	2.94258e+06	1.55678e+06	1.50009e+07	2.02254e+07	1.18938e+07	3.60435e+06	5.28483e+07	5.45612e+07	4.75165e+07
963	408.566	360.148	1.68021e+07	1.53652e+07	6.46369e+07	6.29746e+07	2.70813e+07	1.35814e+07	7.06944e+06	2.68526e+07	1.13575e+07	2.54237e+07	1.97978e+07	1.48807e+07	8.44988e+06	8.43188e+06	1.08176e+07	2.78043e+07	4.93491e+06	1.18336e+07	1.80547e+07	3.10301e+07	2.43947e+07	3.9577e+07	2.76726e+07
964	141.066	251.09	4.66561e+06	3.05065e+06	6.17032e+06	2.97286e+06	2.76585e+06	7.02575e+06	6.25129e+06	2.17834e+06	1.92418e+06	3.30139e+06	3.54358e+06	219589	229426	2.00897e+06	218090	66998.5	0	185027	150098	150794	2.03639e+06	2.41002e+06	2.02346e+06
965	170.189	758.567	1.4309e+08	2.16506e+08	2.46572e+08	3.55046e+08	2.58036e+08	6.79229e+07	6.31329e+07	1.32208e+08	3.33011e+08	2.66234e+08	7.87874e+07	1.70331e+08	9.6023e+07	5.1185e+07	6.71133e+07	2.37762e+08	1.7446e+08	2.15372e+08	2.30156e+08	5.27739e+07	2.23711e+08	2.00574e+08	2.00582e+08
966	174.268	716.52	6.24535e+06	1.2029e+07	1.39323e+07	2.55326e+07	2.0819e+07	941430	5.93651e+06	1.71009e+07	2.96399e+07	1.15157e+07	4.64518e+06	1.47163e+07	5.82789e+06	817097	1.30716e+06	1.22536e+07	8.67488e+06	1.15997e+07	9.13984e+06	3.76801e+06	1.30674e+07	1.40105e+07	1.40439e+07
967	168.345	788.612	1.15094e+08	1.26839e+08	2.192e+08	1.92758e+08	2.73101e+08	1.02979e+08	9.79422e+07	2.17675e+08	3.53739e+08	2.21501e+08	6.28159e+07	1.70713e+08	1.31718e+08	3.48925e+07	6.64148e+07	2.14733e+08	1.88121e+08	2.09356e+08	1.1829e+08	6.47189e+07	1.98645e+08	1.96019e+08	1.9876e+08
968	102.348	589.407	0	296643	0	175420	0	206152	238651	186023	0	0	1.21547e+06	4.82562e+06	4.04017e+06	4.53509e+06	2.79195e+06	1.8688e+06	2.36117e+06	2.32216e+06	3.93255e+06	4.72101e+06	965342	1.11862e+06	1.43677e+06
969	160.988	774.538	568117	2.00874e+06	1.42465e+06	2.0764e+06	2.4709e+06	0	2.37773e+06	76469.7	3.67505e+06	4.07887e+06	527090	373933	395337	61385	597285	4.02267e+06	1.13755e+06	2.44021e+06	1.30054e+06	685143	1.57066e+06	1.42961e+06	1.85022e+06
970	198.357	352.164	3.26413e+06	0	0	971821	2.89699e+06	0	126264	0	3.88795e+06	6.03252e+06	30693.1	1.5563e+06	0	0	0	1.60325e+06	390672	2.18555e+06	261624	157394	1.32108e+06	1.08278e+06	1.06186e+06
971	399.496	219.079	3.52983e+06	51931.5	879006	573391	6.66522e+06	952654	381464	82525.9	2.03081e+06	1.06368e+07	130811	5.61866e+06	337980	15562.4	78563.6	478409	621113	289810	389039	291000	2.09404e+06	1.72996e+06	1.9945e+06
972	269.032	235.153	0	3.34179e+06	4.74145e+07	332244	1.85208e+06	0	388164	133057	1.77168e+06	2.92524e+06	0	578134	0	0	0	1.55272e+06	0	660512	138767	0	882590	702666	675382
973	231.064	563.209	887745	554389	1.38415e+06	475095	209802	1.01771e+06	1.09798e+06	325635	600935	682319	167771	39675.6	0	13852.9	21665.7	0	0	93617.8	0	0	433003	418056	363008
974	212.263	544.332	1.21955e+06	5.43542e+06	3.58682e+06	2.8625e+06	4.92346e+06	1.49417e+06	1.77101e+07	1.13965e+07	7.35823e+06	4.68301e+06	7.78508e+06	1.32137e+07	1.0303e+07	2.60769e+06	5.78881e+06	2.27956e+06	1.06634e+07	3.30833e+06	1.25286e+07	6.39884e+06	5.14553e+06	8.19566e+06	3.05529e+06
975	403.931	296.064	1.1319e+07	3.05631e+06	3.76867e+06	1.09324e+06	1.26663e+07	1.31463e+07	8.21729e+06	1.12429e+07	3.20787e+07	1.7968e+07	633358	1.53789e+07	4.38017e+06	1.61583e+06	1.12094e+06	7.02903e+06	4.91782e+06	9.7878e+06	4.78743e+06	1.73811e+06	8.90158e+06	8.09124e+06	8.75038e+06
976	211.922	297.168	0	0	0	0	116078	0	0	0	0	0	1.91539e+06	2.65765e+06	2.28285e+06	2.08714e+06	1.30601e+06	1.60154e+06	1.50623e+06	1.16276e+06	3.04456e+06	1.12602e+06	852188	806265	958121
977	147.071	656.614	1.23306e+06	81567.8	882052	298030	490331	223843	96950	925463	1.1434e+06	486973	845769	849100	668042	0	0	1.08976e+06	387367	708747	704373	966936	858921	562086	637378
978	197.006	294.132	1.80205e+06	910605	1.55308e+06	615960	863116	1.14687e+06	1.43188e+06	311097	804460	1.1848e+06	0	0	0	61803.6	0	0	0	0	0	0	406412	504937	279423
979	167.502	782.566	7.1183e+07	3.40814e+07	6.10602e+07	8.68214e+07	6.34655e+07	8.40194e+06	1.17608e+07	2.63951e+07	7.68133e+07	5.06646e+07	1.56229e+07	3.54753e+07	2.88366e+07	1.37392e+07	1.77841e+07	7.8384e+07	5.54624e+07	7.12691e+07	4.7485e+07	1.12222e+07	4.9693e+07	4.94412e+07	4.95981e+07
980	351.532	248.135	220125	107785	574016	63644.9	397327	251726	212102	641037	1.53385e+06	357679	502086	679051	416256	253022	773088	1.2701e+06	483874	548445	1.22045e+06	564160	430795	386946	413786
981	163.962	824.646	1.13444e+06	1.45628e+06	5.91326e+06	2.16494e+07	1.79933e+07	5.96343e+06	1.55911e+07	531180	4.17527e+06	3.40017e+07	2.59486e+06	77601.7	1.5902e+06	372549	6.95547e+06	1.7838e+07	3.71356e+06	1.61787e+07	6.24561e+06	2.82065e+06	8.31697e+06	8.55821e+06	7.41505e+06
982	170.183	756.552	3.98003e+07	2.84659e+06	1.78253e+07	1.16216e+07	1.5775e+07	5.54157e+06	1.90534e+06	1.25565e+07	3.44019e+07	6.90784e+06	0	3.45894e+07	3.17476e+06	0	913941	1.78932e+07	1.49436e+07	1.46497e+07	8.47794e+06	1.2226e+06	2.04583e+07	1.33064e+07	1.00211e+07
983	195.821	187.095	1.9015e+07	1.15088e+07	2.01051e+07	8.04089e+06	8.22177e+06	1.65064e+07	1.41595e+07	1.16969e+07	1.00572e+07	1.24896e+07	1.86457e+07	2.17633e+07	1.36121e+07	1.47723e+07	2.1024e+07	2.39532e+07	1.45654e+07	2.04691e+07	2.44794e+07	1.20452e+07	6.82457e+06	5.91257e+06	5.6303e+06
984	140.442	207.137	1.06424e+08	5.11856e+07	4.71909e+07	5.28938e+07	1.26995e+08	1.0212e+08	8.30528e+07	1.05416e+08	1.51796e+07	1.50218e+08	4.28653e+07	6.20313e+07	4.32065e+07	4.8464e+07	8.28272e+07	7.87368e+07	6.43052e+07	1.03731e+08	1.1296e+08	6.40339e+07	3.35496e+07	4.00042e+07	3.80743e+07
985	326.586	279.109	1.79533e+06	973165	547769	1.13108e+06	1.42832e+06	570649	1.17383e+06	272546	2.22039e+06	2.4074e+06	202140	477644	107974	90135.3	174061	573072	137948	333824	439647	396874	1.03496e+06	900404	821814
986	161.274	790.571	551203	4.94743e+06	680897	1.8035e+06	1.12601e+06	0	2.10417e+06	84484.2	1.73771e+06	2.22428e+06	221467	0	0	79229.5	93984.4	2.05404e+06	411131	1.26117e+06	699785	69685.6	1.16151e+06	1.09929e+06	781405
987	323.865	165.05	1.84908e+07	3.3822e+07	2.96545e+07	2.37463e+06	5.24273e+07	4.16017e+07	3.17925e+07	2.57821e+07	2.36817e+07	6.0297e+07	8.09261e+06	2.18442e+07	4.1856e+07	2.80792e+07	4.20138e+07	6.84187e+07	5.48205e+07	1.83506e+07	2.93331e+07	2.76637e+07	1.14756e+07	3.98158e+07	1.86654e+07
988	38.0149	788.606	1.05332e+07	8.99548e+06	1.2247e+07	1.39873e+07	1.28417e+07	1.05566e+07	1.19072e+07	1.33394e+07	2.36423e+07	1.56987e+07	722475	1.33491e+06	891016	1.08705e+06	1.03827e+06	3.69333e+06	786085	3.93099e+06	1.51528e+06	1.42579e+06	7.59761e+06	9.35047e+06	7.87222e+06
989	351.156	283.061	0	53181.8	57395.8	2.57812e+06	825390	140822	0	51692.4	726730	352368	185861	41276.9	134875	43448.8	76497.9	2.23975e+06	48717.6	4.91859e+06	2.12222e+06	470140	631518	640520	658148
990	34.3697	295.188	4.51394e+06	6.03698e+06	3.80507e+06	2.69211e+06	2.66674e+06	3.37312e+06	4.42756e+06	4.79361e+06	891313	2.30475e+06	2.92706e+07	1.51482e+07	1.73402e+07	2.1878e+07	3.31971e+07	3.49656e+07	1.48286e+07	1.63608e+07	1.76503e+07	2.29546e+07	1.41988e+07	1.3029e+07	1.24754e+07
991	270.094	145.049	6.98125e+06	6.516e+06	1.3714e+07	1.75342e+07	5.72071e+06	8.51626e+06	8.11226e+06	7.05116e+06	1.6269e+07	8.52464e+06	7.77361e+06	1.13033e+07	8.15281e+06	6.88635e+06	7.19701e+06	9.04391e+06	6.67835e+06	6.45616e+06	6.61815e+06	1.02042e+07	1.15834e+07	9.01277e+06	8.17017e+06
992	47.1457	772.61	5.1467e+06	6.68674e+06	6.03693e+06	6.28912e+06	4.4583e+06	7.07454e+06	5.75813e+06	6.84584e+06	3.04085e+06	7.78669e+06	781546	2.04325e+06	1.43233e+06	1.60098e+06	1.62355e+06	540367	1.36293e+06	1.36739e+06	1.63679e+06	2.02629e+06	2.14204e+06	2.99164e+06	3.28788e+06
993	303.16	226.047	85523.3	242514	106455	68955.4	605561	107861	233451	236091	350141	80299	207174	270171	391657	0	1.10566e+06	35063.7	128630	240397	0	430119	174160	170030	0
994	196.656	177.054	3.81349e+07	1.24672e+07	3.86267e+07	3.26921e+07	4.4165e+07	1.91606e+07	1.7227e+07	2.85489e+07	2.58287e+07	6.89126e+07	0	0	0	330482	959808	485742	459433	775790	222269	0	2.91106e+07	2.78094e+07	2.43463e+07
995	151.784	140.046	2.7966e+06	2.71519e+06	3.77783e+06	4.01302e+06	5.67568e+06	4.44106e+06	4.2618e+06	1.89288e+06	2.36577e+06	3.9921e+06	0	0	0	0	611706	0	0	0	0	0	1.53142e+06	2.40409e+06	1.63822e+06
996	310.526	219.025	305327	2.00535e+06	1.15949e+06	646149	1.73938e+06	639906	914139	1.44594e+06	2.12735e+07	1.91219e+07	1.53288e+06	576044	1.656e+06	1.98098e+06	2.85292e+06	1.02812e+06	2.06404e+06	914284	1.25262e+06	8.50796e+06	1.73884e+06	953943	843948
997	231.029	397.269	736213	24694	79119	0	111602	3.3682e+06	376806	162319	1.13607e+06	1.36866e+06	0	981241	43489.4	0	0	240136	56700.9	93835.2	0	0	509156	476479	347124
998	242.894	300.142	20483.8	1.39926e+06	100862	1.99152e+06	39196.6	233186	4.30052e+06	2.49633e+06	143597	80160.4	623886	0	0	0	0	0	0	0	0	188035	100508	366692	575203
999	31.3998	361.236	0	0	0	82398.3	123749	64708.8	0	0	0	65627.3	6.93889e+06	3.47079e+06	2.84345e+06	4.39487e+06	5.84112e+06	8.00965e+06	4.70488e+06	5.1122e+06	5.23674e+06	4.45749e+06	2.23297e+06	1.8819e+06	1.29479e+06
1000	265.108	382.184	819347	232611	540863	435723	849070	276073	715890	451737	653742	843141	0	60250.5	0	73761.2	14961	41893.1	0	77272	49200.3	0	343088	357315	307948
1001	468.486	505.173	40413	222172	2.94432e+06	941167	921937	90749	0	698152	680724	663055	204668	1.7907e+06	381103	20547.4	7846.09	1.60162e+06	6368.15	60022.3	654535	864300	934841	924583	929335
1002	161.713	780.585	1.52544e+06	4.19707e+06	8.86197e+06	3.26907e+07	2.52691e+07	114964	1.01135e+07	1.14396e+06	9.64612e+06	3.58465e+07	4.73739e+06	1.4919e+06	1.99826e+06	598994	5.84806e+06	2.07984e+07	6.20592e+06	2.80774e+07	8.2724e+06	4.90552e+06	1.15345e+07	1.15117e+07	1.09056e+07
1003	79.3675	413.214	0	0	0	0	0	0	0	0	0	0	1.49018e+07	1.90946e+07	1.39536e+07	6.85012e+06	1.18061e+07	1.58721e+07	9.09173e+06	2.11065e+07	2.56723e+07	8.18781e+06	8.05573e+06	5.55194e+06	7.82417e+06
1004	169.031	559.505	346959	2.23296e+06	3.45121e+06	1.39526e+06	2.26551e+06	0	2.33012e+06	2.18002e+06	847229	705340	1.40224e+06	1.40413e+06	1.79873e+06	451825	575554	2.82839e+06	1.24736e+06	2.18098e+06	2.97699e+06	1.46937e+06	2.50694e+06	2.4013e+06	2.05194e+06
1005	179.9	417.151	5.73496e+06	4.97499e+06	5.35966e+06	5.73392e+06	2.36928e+06	6.11113e+06	4.92534e+06	1.86131e+06	1.80013e+06	3.40051e+06	9.74435e+06	665400	1.1229e+06	2.44881e+06	5.7328e+06	2.55644e+06	3.32773e+06	570694	1.97797e+06	2.62339e+06	5.40634e+06	3.37037e+06	3.39043e+06
1006	33.4201	267.158	936749	839726	1.19184e+06	1.35723e+06	922785	1.44778e+06	755685	1.49327e+06	745570	892280	3.35609e+07	3.25448e+07	2.42303e+07	2.23152e+07	3.18204e+07	3.72272e+07	3.03919e+07	2.61567e+07	3.07795e+07	2.67356e+07	1.73953e+07	1.53708e+07	1.48995e+07
1007	198.728	311.11	559068	78392.3	568910	141158	408149	208290	272153	82295.2	292688	452710	3.66121e+06	5.426e+06	4.02892e+06	5.56312e+06	8.91176e+06	6.62122e+06	5.58886e+06	5.41811e+06	4.93878e+06	5.23644e+06	2.19695e+06	2.2316e+06	2.09303e+06
1008	200.277	517.167	727431	148404	686706	143027	741524	1.57321e+06	1.29417e+06	99883.8	403794	690358	38381.8	0	35963.6	0	0	0	0	0	0	654136	352319	446283	317184
1009	167.257	765.511	1.08871e+06	1.41129e+06	658626	477043	452439	2.27025e+06	1.79384e+06	2.2813e+06	0	0	1.18318e+06	4.58005e+06	5.24028e+06	3.72667e+06	2.17437e+06	558916	1.31945e+06	1.05036e+06	4.07354e+06	3.88746e+06	1.12454e+06	904506	1.75037e+06
1010	164.841	808.581	9.55791e+06	4.95744e+06	1.16102e+07	2.35959e+07	2.5031e+07	1.80224e+06	2.29731e+06	6.40339e+06	3.96125e+07	2.15653e+07	3.80969e+06	9.16477e+06	6.31244e+06	2.88718e+06	4.82728e+06	2.25638e+07	1.29608e+07	2.05041e+07	9.39722e+06	2.38963e+06	1.28859e+07	1.3391e+07	1.37692e+07
1011	203.15	359.11	1.11526e+06	406745	424326	483068	546889	174486	422521	297675	546209	485502	370604	86977.2	144726	290595	0	216180	36301.7	0	163137	97734	482983	506293	374697
1012	57.8754	209.079	2.53402e+07	2.12118e+07	2.79296e+07	2.13977e+07	1.96763e+07	2.37668e+07	2.39035e+07	1.89727e+07	1.82696e+07	1.8939e+07	3.96219e+06	4.54382e+06	8.63434e+06	4.54092e+06	3.16611e+06	3.15026e+06	1.11797e+07	1.86516e+06	8.23037e+06	9.77482e+06	1.52714e+07	1.49074e+07	1.64891e+07
1013	345.089	283.092	61427.6	263852	267319	242488	152046	552861	195134	404969	35194.5	53486.1	1.92543e+06	2.20266e+06	2.07197e+06	1.42635e+06	3.90494e+06	2.31768e+06	2.64369e+06	2.36248e+06	4.06902e+06	1.26472e+06	918327	926597	999311
1014	153.384	355.116	6.2483e+06	6.62596e+06	7.05472e+06	3.85887e+06	7.41026e+06	6.30726e+06	5.70624e+06	5.66077e+06	3.80663e+06	4.13661e+06	0	0	39393.8	75593.1	0	0	0	0	0	0	3.85272e+06	3.63695e+06	4.77879e+06
1015	31.4936	277.178	4.97594e+06	3.81388e+06	4.14084e+06	2.45867e+06	2.51353e+06	4.14149e+06	4.04064e+06	4.15289e+06	1.52882e+06	3.71766e+06	1.01647e+07	5.47838e+06	8.84486e+06	4.92036e+06	8.65276e+06	8.5037e+06	6.24537e+06	5.06435e+06	6.73571e+06	5.79649e+06	5.38845e+06	4.48188e+06	4.65732e+06
1016	158.753	714.548	1.30476e+06	491370	1.39785e+06	335201	899872	389704	1.38023e+06	3.20955e+06	3.46671e+06	0	2.73219e+06	2.71198e+06	396317	0	0	742283	575427	2.52885e+06	70175.2	0	1.54452e+06	1.1768e+06	1.3395e+06
1017	33.1626	507.423	5.71246e+06	5.52261e+06	3.85214e+06	5.27503e+06	2.73462e+06	1.52775e+06	2.77152e+06	6.40727e+06	4.67169e+06	409760	1.99543e+06	4.31146e+06	3.14304e+06	664489	810240	1.349e+06	378305	2.54457e+06	3.42994e+06	3.50073e+06	2.12572e+06	2.17478e+06	1.02143e+06
1018	217.233	550.385	4.51337e+06	301755	1.46164e+06	654881	2.21999e+06	8.90527e+06	3.3051e+06	2.39645e+06	9.95949e+06	3.94524e+06	167692	1.66003e+06	424196	213155	68178	625481	684108	813549	270547	38006	2.2749e+06	2.47964e+06	1.95187e+06
1019	314.963	429.184	0	0	78357.8	321819	327341	0	0	0	367840	1.394e+06	0	40250.6	0	0	0	442983	0	0	31300.8	0	377495	303834	204555
1020	160.553	375.179	0	0	0	0	0	0	0	0	0	0	3.07092e+06	380356	834051	1.6597e+06	1.01588e+06	377311	951533	0	1.00934e+06	1.45407e+06	280984	126772	284613
1021	172.952	746.565	3.52361e+07	3.18073e+07	4.82334e+07	4.81636e+07	6.00185e+07	6.39046e+07	5.84046e+07	2.10769e+07	4.82874e+07	4.86041e+07	2.70688e+07	4.27693e+07	2.61643e+07	9.99312e+06	1.29803e+07	7.09431e+07	3.96202e+07	7.78105e+07	3.46108e+07	3.64104e+07	3.72782e+07	4.98135e+07	4.36434e+07
1022	170.028	772.58	2.38018e+07	6.22864e+06	1.51768e+07	3.21212e+07	1.19034e+07	3.00905e+07	3.95051e+07	1.11835e+07	3.49744e+07	7.22147e+07	9.6123e+06	2.16794e+07	1.02744e+07	4.05505e+06	1.73591e+07	2.37971e+07	1.09921e+07	9.178e+06	1.25752e+07	1.66947e+07	1.73194e+07	1.63013e+07	2.04207e+07
1023	295.485	303.143	1.07361e+06	0	0	1.4541e+06	1.0482e+06	0	150126	26964	3.40671e+06	8.18611e+06	21614.2	6.65227e+06	0	0	0	2.55638e+06	0	1.65822e+06	36718.7	0	1.26953e+06	960543	1.29362e+06
1024	131.695	212.117	1.43225e+07	4.1392e+06	7.15274e+06	5.41657e+06	3.16828e+06	3.6365e+06	6.65601e+06	4.61684e+06	3.95234e+06	4.06957e+06	1.60833e+06	2.28705e+06	1.69892e+06	1.78238e+06	3.36367e+06	2.69705e+06	723209	3.7361e+06	2.59568e+06	2.07174e+06	2.92662e+06	3.46735e+06	3.18545e+06
1025	76.6278	156.138	823036	0	463025	242475	0	0	0	0	0	753808	1.2717e+07	2.19939e+06	1.38706e+07	5.97456e+07	9.19385e+06	8.78024e+06	7.85394e+06	3.834e+06	7.35519e+06	1.47983e+07	6.76764e+06	7.19227e+06	6.94029e+06
1026	65.6086	307.101	9.39793e+06	538150	2.83769e+07	2.15863e+06	1.57607e+06	1.07915e+06	3.15076e+06	601888	5.30318e+06	1.3659e+06	0	0	0	0	2.04528e+06	4.31015e+06	274315	826440	1.53121e+06	0	4.07965e+06	4.20432e+06	4.89947e+06
1027	101.394	369.225	0	0	136550	52779.6	0	0	0	0	0	0	1.59449e+07	1.77705e+07	1.52284e+07	1.17212e+07	1.69324e+07	1.90723e+07	1.27949e+07	2.49658e+07	2.36349e+07	1.08378e+07	1.18396e+07	1.1164e+07	1.10779e+07
1028	156.212	507.184	572831	643724	3.52731e+06	0	489020	97401.1	273366	1.61714e+06	821672	427590	0	0	0	0	0	0	0	0	0	0	309073	287282	149885
1029	59.87	89.0597	1.19216e+07	1.0677e+07	7.01084e+06	8.2534e+06	9.45331e+06	1.85192e+07	1.18071e+07	3.23649e+07	6.55971e+06	5.78579e+06	1.53602e+07	3.67489e+07	2.24861e+07	4.44346e+07	1.77311e+07	1.09252e+07	2.14489e+07	1.16159e+07	3.67848e+07	2.58156e+07	1.5674e+07	1.4746e+07	1.86457e+07
1030	224.703	247.143	1.99777e+07	2.35144e+06	2.27705e+06	5.33709e+07	2.18228e+07	2.23964e+07	5.95971e+06	5.718e+06	9.84695e+06	2.58084e+07	7.60928e+06	3.69907e+06	1.23579e+06	907563	2.05131e+06	6.47304e+06	2.95607e+06	1.28496e+07	1.7699e+07	4.13514e+06	1.20441e+07	1.20934e+07	1.02072e+07
1031	272.424	393.221	433544	227812	2.33503e+06	1.01964e+07	4.65291e+06	123852	445592	278741	5.58993e+06	1.42455e+07	226628	663969	23325.8	59673.2	0	4.69598e+06	41369.4	384197	1.43438e+06	0	1.42357e+06	1.99126e+06	1.08417e+06
1032	235.365	852.51	1.44123e+06	1.05433e+06	1.44675e+06	1.12348e+06	1.24781e+06	588990	647100	1.11933e+06	0	0	8.41451e+06	1.7329e+07	1.00466e+07	9.10743e+06	6.16152e+06	6.66291e+06	9.3417e+06	7.56554e+06	1.68463e+07	1.50749e+07	6.44433e+06	6.5846e+06	6.73701e+06
1033	263.44	284.169	4.49434e+06	374905	0	0	305968	390895	247464	684526	616375	85658.1	572446	131709	232178	1.2982e+06	197785	321629	310982	363778	690879	162822	906888	881197	801423
1034	51.9501	139.111	87701.8	107403	349975	91642.3	257315	112614	216399	0	557448	0	3.90421e+06	1.03642e+07	2.72864e+06	6.93971e+06	4.93447e+06	3.18713e+06	2.37236e+06	5.44567e+06	4.24351e+06	3.67542e+06	1.80776e+06	990462	2.44416e+06
1035	47.5622	648.465	0	322255	293505	0	0	0	349636	354722	2.47628e+07	1.61553e+07	0	0	0	0	0	0	0	0	0	0	2.12137e+06	2.23555e+06	2.1126e+06
1036	163.037	738.538	622204	1.11762e+06	4.05024e+06	4.10096e+06	7.07981e+06	57495.5	3.36877e+06	1.65774e+06	6.38145e+06	8.25157e+06	1.88947e+06	2.24174e+06	1.38913e+06	289261	999457	5.46575e+06	2.18164e+06	7.18035e+06	1.77396e+06	1.27284e+06	3.26557e+06	3.61431e+06	3.29109e+06
1037	30.1494	355.067	202925	340470	628541	563236	370877	325631	325251	507759	359035	725450	98730.5	109012	179543	0	0	98200.8	198935	62040.8	66576.5	86022.5	927057	1.45564e+06	1.40173e+06
1038	30.7587	277.215	7.08747e+06	4.68348e+06	6.95733e+06	2.7953e+06	2.76218e+06	3.33106e+06	6.59657e+06	7.65199e+06	1.73903e+06	3.50664e+06	7.97034e+06	7.17516e+06	7.18785e+06	1.01988e+07	9.74867e+06	8.76758e+06	7.19421e+06	7.01485e+06	8.76229e+06	7.05981e+06	6.07647e+06	1.69849e+06	5.51367e+06
1039	32.8439	93.0698	61487.8	558507	576328	328485	95691.4	568729	494164	102998	1.53598e+06	77261.3	7.45447e+06	4.82153e+06	4.95405e+06	9.52079e+06	1.08567e+07	1.46863e+07	7.21102e+06	7.05553e+06	5.39349e+06	6.48411e+06	4.08346e+06	2.69171e+06	4.37153e+06
1040	33.6532	137.095	3.52199e+06	2.06394e+06	1.72594e+06	1.43766e+06	2.13581e+06	59390.2	2.79179e+06	1.1757e+06	1.15454e+06	1.60295e+06	8.79448e+06	8.44992e+06	6.14557e+06	1.0599e+07	8.48799e+06	1.75476e+07	6.12757e+06	5.64903e+06	9.84785e+06	3.16933e+06	3.88768e+06	3.39533e+06	3.19891e+06
1041	95.066	854.702	1.35396e+06	0	2.4891e+06	2.15429e+06	3.70662e+06	584875	2.85179e+06	1.38017e+06	4.30915e+06	1.6055e+06	301457	2.14968e+06	1.17735e+06	133334	50589.6	2.58381e+06	941179	961878	575662	1.77291e+06	1.26319e+06	1.6049e+06	1.59517e+06
1042	78.3358	479.298	0	0	0	0	0	0	0	0	0	0	1.78983e+06	4.11589e+06	1.30297e+06	1.01089e+06	876567	837837	1.00249e+06	390928	2.24294e+06	1.53051e+06	215317	297690	0
1043	314.122	168.051	2.52815e+06	3.03539e+06	2.20966e+06	2.04627e+06	2.50804e+06	2.14431e+06	2.06742e+06	2.07544e+06	2.66538e+06	3.11838e+06	1.34761e+06	2.52198e+06	1.449e+06	558669	818623	2.38548e+06	1.30542e+06	2.67454e+06	1.74675e+06	1.28092e+06	2.21248e+06	1.90431e+06	2.02973e+06
1044	386.524	148.042	1.67231e+06	2.72011e+06	1.43307e+07	8.22301e+06	1.54873e+08	541710	1.73465e+06	1.81489e+06	2.14967e+08	3.58186e+08	1.49113e+07	1.96315e+08	4.89514e+07	264760	9.07683e+06	3.13317e+07	9.84323e+07	2.62028e+07	1.26851e+07	2.48761e+07	9.7371e+07	9.1339e+07	9.83168e+07
1045	224.116	760.508	0	192530	154669	0	399211	0	0	566532	1.75961e+06	709327	0	380905	41314.8	79228.2	0	73570.4	42763.1	20406	26240.3	87192.1	277404	208219	350076
1046	206.371	407.225	0	0	290276	0	0	0	0	0	0	0	291516	730525	542459	529048	276094	149778	500858	199730	699370	353123	291947	140008	267155
1047	227.536	309.204	1.41098e+06	0	0	0	0	58936.1	21676.1	0	0	0	300422	509543	332780	415670	306747	417754	259550	421848	577261	347746	131039	58897.3	169776
1048	91.6903	243.091	2.14818e+06	833190	2.47744e+06	831343	664539	1.1277e+06	4.01068e+06	0	782512	3.9749e+06	0	112206	63734.1	0	0	280541	58771.9	359282	99196.6	0	559869	517776	181144
1049	381.041	263.104	1.06021e+06	233541	322118	923467	3.31324e+06	612622	1.19222e+06	1.00472e+06	3.27432e+06	1.3876e+07	9188.46	2.04605e+06	119575	0	0	1.00847e+06	261227	494831	151369	17790	2.29233e+06	2.26037e+06	2.41989e+06
1050	96.4607	838.709	1.11907e+06	0	2.02739e+06	1.26027e+06	2.0074e+06	427534	1.00149e+06	1.83045e+06	1.66422e+06	439429	2.76524e+06	2.19442e+06	4.39313e+06	675905	351995	3.70742e+06	1.64906e+06	4.81129e+06	3.3608e+06	2.72878e+06	1.62511e+06	1.40205e+06	1.20641e+06
1051	36.8828	211.132	1.44111e+06	532631	579241	475575	1.08968e+06	727088	532913	362504	0	512337	3.71213e+07	4.00091e+07	1.84865e+07	4.03776e+07	3.52338e+07	3.06838e+07	3.34104e+07	3.94878e+07	1.99716e+07	2.18929e+07	1.38462e+07	1.20184e+07	1.26223e+07
1052	167.788	730.572	9.56017e+06	1.87593e+07	3.26914e+07	4.70377e+07	5.45495e+07	6.89507e+06	3.9697e+07	2.37516e+07	2.60633e+07	5.63398e+07	2.60084e+07	2.9199e+07	1.86257e+07	8.06262e+06	1.64729e+07	4.42228e+07	1.63559e+07	3.26601e+07	2.55415e+07	2.33581e+07	3.61713e+07	3.48773e+07	3.06211e+07
1053	50.0919	415.137	6.59215e+06	7.96761e+06	7.56245e+06	8.0941e+06	6.54745e+06	6.11117e+06	7.35881e+06	3.85865e+06	6.28146e+06	6.2908e+06	0	58116.6	159087	359792	0	49679.8	382661	0	68898.2	289486	1.99009e+06	1.7918e+06	2.64549e+06
1054	450.869	211.062	2.87386e+06	1.15029e+06	7.50952e+06	1.71541e+06	1.51156e+06	3.62188e+06	2.83005e+06	3.73884e+06	3.24477e+06	1.92873e+06	167591	126983	180125	204130	201021	173318	136106	249313	169423	133540	3.05858e+06	2.33953e+06	2.67599e+06
1055	178.592	664.487	0	3.48581e+06	0	5.50852e+07	0	0	395697	148429	67300.5	765347	192932	43512.6	44607.9	0	0	0	0	174469	103845	39040.3	3.02163e+06	2.65028e+06	2.96985e+06
1056	173.739	676.523	1.28347e+07	5.81969e+06	1.44699e+07	6.96586e+06	3.97632e+07	3.31354e+06	1.13565e+07	2.53451e+07	1.04946e+08	5.38385e+07	9.65306e+06	9.22176e+07	1.04854e+07	5.39469e+06	2.21965e+06	1.597e+07	5.77421e+06	1.36674e+07	6.51879e+06	1.52563e+07	3.04022e+07	3.08132e+07	2.88214e+07
1057	169.264	746.603	8.13484e+07	4.5741e+07	6.28564e+07	1.32059e+08	1.58207e+08	1.65447e+08	1.83397e+08	8.82261e+07	1.49869e+08	2.37216e+08	5.6019e+07	7.38096e+07	3.3455e+07	2.65865e+07	5.05519e+07	9.00415e+07	3.97412e+07	8.30004e+07	6.4681e+07	7.44812e+07	1.2036e+08	1.12123e+08	1.17588e+08
1058	202.252	815.694	3.40346e+07	4.29466e+07	1.91121e+07	2.76188e+07	3.69787e+07	5.19372e+07	3.02746e+07	2.71122e+07	3.56277e+07	1.83458e+07	1.18134e+07	1.09444e+07	8.71672e+06	5.78792e+06	1.06821e+07	2.78134e+07	1.74901e+07	3.85825e+07	1.01193e+07	1.033e+07	1.39407e+07	1.60437e+07	1.32573e+07
1059	214.032	309.168	0	0	0	81834.4	0	55139.8	0	0	0	0	1.36198e+07	1.3456e+07	1.15726e+07	5.34279e+06	1.34367e+07	1.56752e+07	1.0462e+07	1.88171e+07	1.53446e+07	1.41981e+07	6.55871e+06	6.21054e+06	6.10942e+06
1060	33.321	111.08	1.22099e+06	1.00435e+06	1.3336e+06	1.69731e+06	1.45471e+06	1.82823e+06	1.04215e+06	800334	1.21573e+06	876862	1.77703e+07	4.73909e+06	4.8118e+06	1.21417e+07	2.06897e+07	2.15859e+07	3.97204e+06	7.47627e+06	5.48953e+06	5.94359e+06	3.68705e+06	3.36424e+06	3.75474e+06
1061	177.518	365.121	454969	683008	424424	586742	72270.3	521809	723026	467833	87625.8	78742.8	0	0	0	66087.9	0	0	0	0	0	0	181512	211815	273179
1062	352.228	267.099	107132	68040.2	172626	545783	571066	17581.8	187209	100684	356370	3.33647e+06	238254	546714	74406.8	97199.1	139087	874547	145187	1.77577e+06	351010	294383	324233	401349	324260
1063	58.4896	197.08	3.66908e+07	2.13166e+07	3.12895e+07	3.87005e+07	3.26182e+07	2.38732e+07	3.43478e+07	1.90798e+07	2.43745e+07	2.55276e+07	1.45815e+07	1.06725e+07	1.65466e+07	1.90618e+07	1.58648e+07	1.1665e+07	2.5316e+07	1.05734e+07	1.91935e+07	2.52475e+07	2.30663e+07	2.32615e+07	2.39411e+07
1064	162.264	752.553	1.03091e+07	2.64633e+07	5.11467e+07	1.36729e+08	1.20853e+08	1.66136e+06	4.53856e+07	1.43633e+07	6.76701e+07	1.63999e+08	2.24405e+07	1.79974e+07	1.62794e+07	4.85017e+06	2.4478e+07	1.09282e+08	3.19734e+07	1.20672e+08	4.01128e+07	2.55641e+07	5.63627e+07	5.93023e+07	5.47167e+07
1065	225.797	734.493	0	0	72153.6	0	374378	132915	0	227481	1.70292e+06	561054	0	416710	15381.9	103768	29062.8	56702.6	21628.1	0	0	39396.3	305256	230410	279572
1066	72.1338	385.22	0	0	0	0	0	0	0	0	0	0	5.09444e+06	1.48951e+06	2.18842e+06	1.46504e+06	3.52762e+06	4.93001e+06	1.54461e+06	5.67253e+06	5.33764e+06	923730	1.20161e+06	1.03406e+06	1.44377e+06
1067	135.627	282.106	1.29346e+07	2.43907e+06	1.41189e+07	3.95251e+06	1.91299e+07	1.21297e+07	9.77441e+06	1.25138e+07	4.82721e+06	1.09925e+07	4.0098e+06	4.78326e+06	8.02915e+06	9.25616e+06	2.54858e+06	1.05912e+06	5.57239e+06	1.04343e+06	3.04066e+06	2.17908e+07	1.01537e+07	8.43308e+06	7.24205e+06
1068	172.914	744.549	6.28458e+06	1.75869e+07	2.53494e+07	2.12155e+07	3.55263e+07	0	0	7.39969e+06	4.34121e+07	6.30802e+06	9.50996e+06	2.65736e+07	1.67708e+07	0	2.40689e+06	2.73398e+07	2.26962e+07	3.88702e+07	1.42829e+07	861964	1.40605e+07	1.91476e+07	1.72699e+07
1069	85.4651	724.463	0	1.05401e+06	588863	296232	352078	515114	656878	0	0	0	2.73877e+06	0	815400	552016	792359	804490	1.85797e+06	1.27967e+06	594553	918798	279203	206271	797941
1070	320.092	208.132	4.23907e+06	1.52734e+06	8.81154e+06	4.10715e+06	5.32995e+06	7.86647e+06	1.30892e+07	1.00408e+07	2.32129e+06	3.96679e+06	1.62867e+06	2.80469e+06	3.16249e+06	947026	2.43034e+06	2.9768e+06	4.92567e+06	1.45714e+06	4.82583e+06	1.30044e+06	9.44631e+06	9.97279e+06	8.33765e+06
1071	163.956	724.525	1.27594e+07	3.29782e+07	5.64661e+07	8.03555e+07	9.9157e+07	1.48076e+06	4.02289e+07	2.67605e+07	8.0887e+07	9.23006e+07	1.95029e+07	2.2993e+07	2.10571e+07	6.25274e+06	1.59319e+07	9.96004e+07	3.36936e+07	8.46168e+07	3.31286e+07	2.15182e+07	4.5957e+07	5.01216e+07	4.71467e+07
1072	270.531	173.091	2.39422e+06	1.90425e+06	1.10596e+06	2.24534e+06	893421	3.16692e+06	2.01869e+06	1.32135e+06	1.84002e+06	2.02892e+06	6.3026e+06	6.87166e+06	371500	351989	8.99566e+06	3.31983e+06	9.67456e+06	1.68069e+06	2.43748e+07	3.18722e+06	4.37848e+06	3.42717e+06	4.0374e+06
1073	162.834	748.523	6.82642e+06	3.57777e+07	1.58664e+07	1.43695e+07	1.26547e+07	256520	1.7174e+07	2.62944e+06	3.03197e+07	1.54876e+07	4.36851e+06	4.26493e+06	3.78233e+06	1.15614e+06	3.4092e+06	1.6599e+07	7.22891e+06	1.57719e+07	7.34738e+06	3.91723e+06	1.0183e+07	1.19887e+07	9.90887e+06
1074	152.887	686.464	1.08343e+06	1.9796e+06	1.16931e+06	650767	459850	1.19618e+06	875997	1.25867e+06	0	72124.6	2.35468e+06	6.52865e+06	5.18726e+06	6.68348e+06	3.05114e+06	1.51959e+06	3.40816e+06	2.38662e+06	6.49134e+06	5.38429e+06	2.20094e+06	2.38084e+06	3.06899e+06
1075	381.199	171.112	910910	659707	700145	766135	653889	732379	841440	627569	666594	360705	458667	722218	898599	1.39923e+07	466132	873921	829058	753680	5.1236e+06	5.06655e+06	1.74534e+06	1.42595e+06	1.49845e+06
1076	138.066	667.643	0	0	61442.6	0	0	0	0	0	0	0	3.38807e+06	0	0	0	3.44734e+06	2.186e+06	3.39036e+06	4.66823e+06	0	0	498027	396924	365995
1077	154.143	289.163	0	904352	727686	0	787482	136376	0	1.49821e+06	0	0	1.79283e+07	4.56076e+07	3.59334e+07	4.15785e+07	2.10842e+07	1.31634e+07	3.03219e+07	1.4012e+07	5.01291e+07	2.89099e+07	1.83187e+07	1.84026e+07	1.84872e+07
1078	31.6529	321.24	66474.1	1.00393e+06	251007	139396	443416	183638	196502	294071	0	130402	3.38484e+06	7.0865e+06	6.22551e+06	5.505e+06	4.59284e+06	2.74371e+06	2.76727e+06	1.97096e+06	5.36427e+06	3.87084e+06	2.79848e+06	2.84695e+06	3.25316e+06
1079	240.281	299.053	1.00342e+06	1.23726e+06	664985	129652	897698	723669	591348	808629	1.78099e+06	357148	194796	322732	115122	118703	229025	351033	178363	294911	50879	112928	446404	642384	690573
1080	211.077	318.179	8.05555e+06	0	0	4.86332e+06	6.53528e+06	0	967109	0	1.12034e+06	6.03878e+06	890527	1.18992e+06	328558	330265	519235	4.31495e+06	819847	1.88987e+06	0	221902	2.23532e+06	1.95814e+06	2.17888e+06
1081	34.7708	367.209	31241.5	45363.8	87901.9	0	0	0	0	49800.1	0	0	1.15415e+07	7.68808e+06	4.81794e+06	4.89433e+06	8.81628e+06	1.16117e+07	4.24081e+06	9.8944e+06	6.8385e+06	5.30143e+06	4.21257e+06	2.06881e+06	3.9447e+06
1082	476.89	337.17	630445	0	83666.7	25512.9	1.31335e+06	0	0	27102	2.5887e+06	1.31797e+07	0	968406	48043.3	0	0	2.4024e+06	0	179005	645063	115726	1.65986e+06	2.11295e+06	1.4363e+06
1083	16.0443	137.045	488763	518124	581428	108254	479407	180029	210266	336553	261138	397892	327762	272807	116264	303851	613168	284647	194148	314654	262862	253112	400783	177784	542971
1084	179.281	281.152	0	0	0	0	0	0	0	0	0	0	1.87778e+06	1.34534e+06	3.18766e+06	2.57548e+06	6.2183e+06	3.07032e+06	1.16344e+06	2.86645e+06	2.79122e+06	1.12623e+06	936688	853260	984374
1085	31.8555	221.152	311816	222446	242505	142596	158263	112333	107879	90176.4	53152.2	346494	4.70048e+06	2.94731e+06	2.79219e+06	7.28372e+06	4.17828e+06	5.1583e+06	4.37665e+06	3.91596e+06	5.11498e+06	5.12148e+06	2.44662e+06	2.01262e+06	2.13335e+06
1086	169.261	700.525	1.65322e+07	5.50114e+07	8.04349e+07	4.30338e+07	6.79254e+07	2.78385e+06	4.84963e+07	5.43282e+07	3.40595e+07	2.78245e+07	3.60319e+07	4.00285e+07	4.2737e+07	1.33295e+07	1.47215e+07	6.50094e+07	3.13851e+07	4.52544e+07	6.2687e+07	3.8201e+07	5.05744e+07	4.97064e+07	4.76415e+07
1087	161.442	778.569	2.90906e+06	5.14502e+06	9.26123e+06	2.29769e+07	1.96549e+07	0	1.06565e+07	1.30899e+06	1.41272e+07	3.03101e+07	3.22161e+06	4.55138e+06	2.17529e+06	643590	5.52897e+06	1.6721e+07	6.851e+06	2.28157e+07	6.58187e+06	4.53556e+06	1.05476e+07	1.01157e+07	1.00952e+07
1088	160.895	776.555	3.14539e+06	1.23241e+07	9.79377e+06	2.06893e+07	1.76489e+07	310389	1.12447e+07	1.12397e+06	1.61245e+07	2.58424e+07	3.6695e+06	1.94705e+06	2.42248e+06	732399	4.99144e+06	1.86639e+07	6.93998e+06	2.17657e+07	6.82765e+06	4.02221e+06	9.56881e+06	1.04417e+07	9.79187e+06
1089	210.442	419.17	3.06287e+06	2.84032e+06	3.46744e+06	2.95951e+06	930115	2.74514e+06	1.73829e+06	909514	997786	990081	71784.6	0	18839.3	62947.7	100579	0	31762	37916.1	0	0	1.48101e+06	673095	955722
1090	143.219	391.231	0	535680	522715	0	1.48828e+06	614826	280908	1.97983e+06	0	0	3.04538e+07	7.56232e+07	5.20643e+07	6.53219e+07	3.03489e+07	1.94932e+07	4.08189e+07	1.97775e+07	7.5223e+07	4.15527e+07	2.19345e+07	2.22457e+07	2.11715e+07
1091	216.815	273.111	9.19543e+06	4.42344e+06	1.04048e+07	4.06108e+06	5.90403e+06	6.20156e+06	6.00413e+06	5.33761e+06	3.4095e+06	3.29131e+06	445555	1.23081e+06	569425	599722	257364	289003	356351	460409	312369	586326	3.4317e+06	3.60406e+06	3.27945e+06
1092	161.713	663.445	0	219541	0	138310	62569.3	155535	152767	249963	0	0	1.32042e+06	4.02325e+06	3.58185e+06	4.26521e+06	2.06046e+06	1.02692e+06	2.06865e+06	3.40701e+06	3.56191e+06	3.09079e+06	1.20782e+06	887151	1.32315e+06
1093	97.9599	810.677	4.39127e+06	484635	4.57368e+06	3.10665e+06	5.83351e+06	3.25257e+06	4.8128e+06	5.85918e+06	2.35599e+06	1.52564e+06	3.6781e+06	3.43116e+06	4.37507e+06	834767	656675	4.17515e+06	2.43469e+06	5.27743e+06	2.89333e+06	3.63619e+06	4.01027e+06	2.91569e+06	2.90683e+06
1094	156.494	399.127	4.39048e+06	1.55835e+06	9.52584e+06	2.51415e+06	1.88288e+06	751226	2.11209e+06	3.89414e+06	3.50861e+06	2.20104e+06	0	0	0	0	0	0	0	0	0	59232.8	1.79791e+06	1.95324e+06	1.88162e+06
1095	159.005	171.101	2.15801e+07	1.84193e+07	4.00725e+07	1.53192e+07	1.36947e+07	2.42281e+07	2.22714e+07	9.00356e+06	1.3942e+07	1.61177e+07	1.42226e+06	854366	1.32232e+06	1.70697e+06	3.51721e+06	1.42293e+06	2.44854e+06	1.09239e+06	4.7223e+06	2.18537e+06	1.10625e+07	1.07533e+07	1.05789e+07
1096	48.4793	377.266	1.15252e+06	822367	769948	983574	617114	111353	1.10396e+06	900884	528681	0	3.01668e+06	3.77432e+06	945378	3.96485e+06	2.13557e+06	3.03513e+06	2.40505e+06	2.38803e+06	3.43401e+06	2.22674e+06	2.09635e+06	1.15528e+06	1.31258e+06
1097	25.3886	354.098	305359	27577.6	289127	6971.07	928009	26771.5	121283	36176	7180.65	38799.1	39451.4	130501	27724.8	139101	0	0	69971.9	1.06063e+06	0	85383.9	220669	153720	168630
1098	36.0465	379.245	0	0	0	0	0	0	0	0	0	0	4.74201e+06	4.40653e+06	5.04129e+06	5.73856e+06	4.24398e+06	1.00567e+07	2.77165e+06	3.19265e+06	5.21015e+06	4.57297e+06	1.4334e+06	1.29753e+06	1.26948e+06
1099	319.421	391.205	298318	0	295236	1.993e+06	527951	0	568882	334223	474876	3.23994e+06	26517	100525	45438.4	38255.9	0	2.06745e+06	23002.6	144171	114926	59043.3	755131	785809	786362
1100	182.878	178.071	1.8367e+07	1.03634e+07	1.76384e+07	2.45721e+07	2.05989e+07	9.58006e+06	1.7985e+07	2.52209e+07	1.67041e+07	2.91802e+07	4.7545e+06	1.28624e+07	5.55664e+06	4.09504e+06	1.02885e+07	1.76706e+07	1.24163e+07	1.95325e+07	1.11175e+07	7.69095e+06	1.72466e+07	1.70281e+07	1.66399e+07
1101	107.753	726.581	1.40722e+06	589596	1.57329e+06	1.62924e+06	2.2068e+06	955992	1.91509e+06	1.86045e+06	1.98222e+06	458695	790131	1.39348e+06	586932	0	387250	1.31833e+06	531587	620422	401535	702774	1.30276e+06	1.10968e+06	1.17329e+06
1102	511.156	234.096	1.10488e+06	613916	1.29338e+06	977844	600425	3.43359e+06	626691	1.02789e+06	3.68173e+06	1.58294e+06	729972	216457	154985	166917	322230	3.85482e+06	167372	334008	4.37849e+06	98623.5	2.55998e+06	2.14361e+06	1.86868e+06
1103	112.234	536.5	7.51158e+06	2.06259e+06	7.66476e+06	5.59808e+06	1.57735e+07	5.45289e+06	5.82363e+06	1.57352e+07	1.97229e+07	6.53257e+06	5.97653e+06	1.22048e+07	4.89749e+06	1.02158e+06	946834	8.52385e+06	4.0643e+06	7.27603e+06	6.39412e+06	4.56346e+06	8.74601e+06	7.71577e+06	8.48299e+06
1104	171.024	674.507	1.43018e+07	1.08842e+07	2.72725e+07	1.23813e+07	5.2063e+07	1.12672e+06	3.41979e+07	2.62687e+07	3.93454e+07	1.0234e+07	1.49989e+07	2.69253e+07	1.87936e+07	5.81218e+06	2.69342e+06	2.74981e+07	1.23409e+07	1.61664e+07	1.65199e+07	1.67795e+07	2.59426e+07	2.46735e+07	2.36101e+07
1105	93.868	393.149	6.08845e+06	352219	1.79788e+06	3.06054e+06	2.34241e+06	1.16096e+06	4.86147e+06	237085	1.12887e+06	3.78271e+06	464514	437922	549977	945950	220970	1.16607e+06	310490	186805	1.18238e+06	824776	1.25591e+06	1.07877e+06	904906
1106	52.1492	323.137	0	5.97693e+06	3.59662e+07	2.91489e+06	768000	232419	375421	294720	5.48141e+06	957748	0	0	0	0	0	0	0	0	0	0	2.77833e+06	2.94467e+06	2.8015e+06
1107	411.148	216.062	2.36675e+07	1.25978e+06	8.1504e+06	3.29921e+06	2.31567e+07	1.4915e+07	1.15935e+07	6.47067e+06	5.59315e+07	5.76623e+07	1.69518e+06	2.44081e+07	3.75646e+06	367934	280243	3.31784e+07	1.16248e+06	6.54694e+06	4.70994e+06	1.34165e+06	1.73545e+07	1.70603e+07	1.65455e+07
1108	162.953	750.539	7.95946e+06	1.89512e+07	1.98053e+07	2.754e+07	3.14277e+07	351097	2.09059e+07	5.63106e+06	3.70414e+07	5.17414e+07	7.15308e+06	1.30328e+07	6.73191e+06	2.2487e+06	7.56428e+06	3.21042e+07	1.38466e+07	3.6096e+07	1.32551e+07	7.78467e+06	2.02677e+07	2.05522e+07	1.93737e+07
1109	161.803	671.46	7.73618e+06	7.85821e+06	7.87283e+06	6.71734e+06	6.05353e+06	6.62323e+06	8.18093e+06	6.67833e+06	3.01713e+06	3.13273e+06	1.63444e+06	1.00811e+06	981336	2.10958e+06	2.51961e+06	812113	2.54644e+06	2.11634e+06	1.35156e+06	1.91504e+06	4.21121e+06	4.06009e+06	4.68598e+06
1110	170.144	688.525	3.29179e+06	1.72337e+06	7.74049e+06	3.55138e+06	1.45423e+07	115158	9.49368e+06	8.81856e+06	4.50676e+06	2.05655e+06	9.45372e+06	8.10991e+06	5.16036e+06	1.47779e+06	957466	5.6498e+06	3.31343e+06	6.67164e+06	2.88189e+06	3.42844e+06	7.83293e+06	6.5398e+06	5.88032e+06
1111	418.808	250.092	491229	272712	1.0819e+06	609829	262507	388875	550411	597256	815578	1.0002e+06	352824	229550	21508.7	0	9845.45	306981	138609	104238	401978	110567	302186	339953	383543
1112	172.699	690.538	2.43812e+06	2.12309e+06	3.18296e+06	1.86519e+06	6.98852e+06	1.18371e+06	6.23081e+06	6.64464e+06	1.44186e+07	1.1757e+07	7.75682e+06	1.77702e+07	3.21042e+06	1.86923e+06	1.11683e+06	3.073e+06	2.01935e+06	4.73338e+06	1.73953e+06	3.24581e+06	7.14291e+06	6.33668e+06	5.46899e+06
1113	373.62	203.138	4.31978e+06	4.91088e+06	7.337e+06	6.60864e+06	1.78641e+07	4.42771e+06	3.41207e+06	3.77233e+06	9.39723e+06	3.85513e+06	3.92666e+06	3.13269e+06	1.95321e+06	2.38877e+06	872505	2.58647e+06	1.8828e+06	5.59263e+06	4.80471e+06	3.23757e+06	5.70333e+06	5.90037e+06	5.05067e+06
1114	393.424	176.091	1.2777e+06	722554	1.18023e+06	360360	610167	991955	412908	721005	1.02691e+06	587042	68085.9	107771	136973	2.25796e+06	152254	616624	171312	145695	842721	371130	552517	443424	619216
1115	102.341	335.204	0	79733.8	0	0	0	128728	81354.3	0	0	0	1.0032e+06	3.19713e+06	2.23011e+06	2.68755e+06	983552	755019	1.58523e+06	879313	2.68362e+06	1.81871e+06	1.18459e+06	1.05799e+06	1.14092e+06
1116	67.8886	211.132	7.95001e+06	0	716348	5.53885e+06	0	110821	3.01344e+06	376697	260198	341594	6.08692e+06	3.82034e+06	3.67269e+06	5.65966e+06	7.94292e+06	5.68317e+06	5.36274e+06	5.02893e+06	4.76646e+06	1.13015e+07	2.401e+06	2.21687e+06	2.7972e+06
1117	141.653	205.085	1.54517e+07	1.79287e+07	1.25572e+07	1.55805e+07	1.00686e+07	2.5187e+07	1.85401e+07	1.19433e+07	1.03811e+07	6.05451e+06	1.26112e+08	3.65299e+07	3.58448e+07	5.81484e+07	1.04357e+08	8.06543e+07	6.17278e+07	2.06244e+07	7.80486e+07	6.93587e+07	4.03533e+07	3.94427e+07	3.9634e+07
1118	192.291	204.077	1.36533e+07	7.10848e+06	1.50395e+07	4.41233e+06	5.67645e+06	1.16015e+07	1.01453e+07	7.6083e+06	6.95737e+06	7.60823e+06	9.95789e+06	1.09169e+07	6.45432e+06	5.99284e+06	1.3826e+07	488471	7.59323e+06	9.78463e+06	1.24123e+07	5.0153e+06	5.77325e+06	5.22314e+06	3.24994e+06
1119	29.7549	549.485	1.1458e+06	254753	494605	951588	696600	577037	258026	1.3391e+06	3.17213e+06	1.6172e+06	233272	916209	22305.4	296213	157697	566937	245139	442689	148172	732549	514611	787684	523314
1120	99.5945	702.511	140725	0	107045	76865.8	0	0	83083.4	0	239769	62083.8	4.99334e+06	7.84953e+06	5.52684e+06	5.38839e+06	4.2864e+06	4.95724e+06	3.12199e+06	9.63887e+06	7.00622e+06	2.43648e+06	3.09999e+06	3.88077e+06	3.99863e+06
1121	30.7017	293.173	1.11067e+06	726921	1.11409e+06	952155	645260	1.3658e+06	1.25462e+06	886050	566551	1.25827e+06	4.28371e+06	3.11244e+06	2.70224e+06	2.99437e+06	4.28683e+06	4.69679e+06	3.34843e+06	3.4666e+06	4.02368e+06	2.55197e+06	2.1725e+06	2.27341e+06	2.83757e+06
1122	201.159	514.19	422988	476111	1.43811e+06	660505	673397	403801	2.97999e+06	263339	575070	643142	106452	0	56292.1	0	0	0	0	0	0	0	505210	481073	381596
1123	97.6097	730.541	0	0	0	0	0	0	0	0	0	0	1.07304e+06	1.84575e+06	763994	397560	609405	789865	245598	2.83646e+06	1.10198e+06	309428	222667	190701	104453
1124	37.8715	333.204	0	0	0	0	0	0	0	0	0	0	3.5965e+06	3.40336e+06	2.10808e+06	4.00316e+06	3.26086e+06	5.30206e+06	1.30783e+06	2.50022e+06	4.30813e+06	2.45029e+06	1.20332e+06	1.20521e+06	1.1319e+06
1125	29.8118	281.246	592714	2.59825e+06	244487	501959	180608	421317	810820	2.15837e+06	51967.6	126320	710734	613036	609356	703409	695723	788483	751051	665586	71930.9	565675	731097	492822	805456
1126	97.6235	648.626	501592	322593	2.07967e+06	982085	1.64172e+06	941098	1.57331e+06	1.77382e+06	670578	184577	596050	977529	1.45435e+06	98769.4	0	1.13641e+06	924149	997923	953924	1.45724e+06	619683	966227	746839
1127	192.408	251.126	5.97538e+07	3.6984e+07	6.61025e+07	2.43159e+07	2.23842e+07	5.13491e+07	4.0203e+07	3.57925e+07	3.6118e+07	3.71246e+07	6.45219e+06	4.38403e+06	1.94808e+06	3.30737e+06	3.24294e+06	2.39454e+06	1.32695e+06	1.3681e+06	3.72378e+06	1.8791e+06	3.15232e+07	3.32532e+07	3.16185e+07
1128	179.918	171.064	5.02305e+07	2.8366e+07	4.10719e+07	2.89478e+07	1.81727e+07	3.34967e+07	2.7278e+07	2.76844e+07	3.66209e+07	2.6351e+07	838431	351559	505643	1.21788e+06	1.10482e+06	515924	750236	585700	959606	819133	2.10764e+07	1.93139e+07	1.89227e+07
1129	103.158	674.478	181134	122813	203627	368220	75995.6	315250	611912	0	1.10312e+06	0	1.46873e+07	1.18493e+07	1.22515e+07	9.35595e+06	7.19498e+06	1.3569e+07	5.39161e+06	1.41018e+07	1.73887e+07	4.93921e+06	7.03939e+06	7.62563e+06	7.45983e+06
1130	192.553	221.116	1.63077e+07	9.07073e+06	1.75989e+07	6.38903e+06	7.39799e+06	1.39983e+07	1.20043e+07	9.93854e+06	8.84649e+06	9.54447e+06	2.38733e+06	1.92255e+06	1.09413e+06	1.47145e+06	1.17162e+06	2.01811e+06	1.34781e+06	791440	1.61543e+06	1.52516e+06	8.73652e+06	8.45402e+06	7.89702e+06
1131	201.403	843.727	7.93163e+06	1.97261e+07	4.64031e+06	3.35806e+06	9.56864e+06	9.57293e+06	3.7224e+06	8.58167e+06	9.9255e+06	3.4322e+06	2.92351e+06	3.34626e+06	3.18635e+06	1.8667e+06	1.36612e+06	7.11802e+06	5.61794e+06	8.74928e+06	2.73838e+06	3.22482e+06	3.59797e+06	3.39248e+06	4.16424e+06
1132	235.657	224.127	3.31384e+06	509926	3.65946e+06	1.73056e+06	1.42469e+06	2.46369e+06	1.47457e+06	1.05422e+06	2.05807e+06	715597	1.89344e+06	745043	1.18656e+06	1.03099e+06	2.4253e+06	2.73139e+06	2.66547e+06	2.54405e+06	3.35693e+06	504479	1.1722e+06	1.02329e+06	830451
1133	336.528	362.204	17153.6	0	0	14435.9	0	0	0	0	95805.8	44803.6	143147	99502.3	68810.6	0	0	119904	0	432011	1.57655e+06	1.01642e+06	353454	661968	1.25476e+06
1134	341.343	89.071	1.65816e+06	1.2895e+06	2.39411e+06	1.38211e+06	1.13569e+06	1.623e+06	2.7788e+06	1.36516e+06	1.72757e+06	5.79553e+06	1.37796e+06	1.10165e+06	1.15408e+06	1.89573e+06	1.71885e+06	1.15711e+06	1.54166e+06	1.12758e+06	1.29574e+06	1.58296e+06	3.60561e+06	2.39158e+06	1.84105e+06
1135	271.804	493.186	394382	737410	842205	462274	368762	765805	182736	546986	757918	620874	21463.3	0	0	0	0	0	0	0	0	0	428501	341193	352662
1136	362.134	233.075	0	495181	0	1.19649e+06	375322	983121	575538	718738	679287	139561	1.3525e+07	2.3413e+07	1.17409e+07	1.01491e+07	9.58176e+06	1.38119e+07	7.36852e+06	1.30093e+07	2.8277e+07	8.49532e+06	6.64891e+06	6.60338e+06	5.70405e+06
1137	283.084	451.213	4.59551e+06	2.45491e+06	1.58611e+06	1.88071e+06	1.37294e+06	2.49265e+06	0	1.37031e+06	1.6324e+06	526655	923791	2.91773e+06	553283	887272	626635	198650	1.50053e+06	840253	397381	735759	0	627306	317848
1138	352.07	467.187	0	0	0	0	0	0	0	0	0	21994	1.44219e+07	9.51471e+06	1.42927e+07	7.26396e+06	2.18947e+07	8.75982e+06	1.50743e+07	9.13447e+06	1.62869e+07	1.45821e+07	2.48562e+06	2.60249e+06	2.37632e+06
1139	245.382	367.098	198662	2.07074e+06	381181	3.24964e+06	1.22385e+06	793127	2.12441e+06	232500	1.51357e+06	262472	0	0	0	0	0	0	0	0	0	0	616245	639075	652400
1140	252.786	361.181	4.8418e+06	27353	0	54856.1	0	42537.8	348175	111730	63643.7	0	0	183803	0	0	0	55334.2	0	11304.1	0	0	275635	200529	207416
1141	283.16	467.187	4.46778e+06	1.86306e+06	1.27327e+06	800344	2.01216e+06	1.51209e+06	0	1.14051e+06	869036	0	828124	1.99922e+06	169742	806437	631497	0	777683	1.03022e+06	217980	365345	161540	274689	260208
1142	327.416	267.109	1.91388e+06	755047	1.17787e+06	625075	1.66057e+06	704891	900987	565904	6.06176e+06	7.17094e+06	102869	693518	89979.1	52168.4	300691	240099	157867	310698	352461	1.09641e+06	1.01334e+06	774458	675038
1143	156.466	381.115	2.99456e+06	1.41615e+06	7.67097e+06	1.4366e+06	1.60516e+06	1.19904e+06	2.08909e+06	3.05789e+06	2.68008e+06	1.8346e+06	0	0	0	0	0	0	0	0	0	0	1.53285e+06	1.80189e+06	1.57784e+06
1144	342.331	407.093	1.38024e+06	263377	2.42548e+06	585952	590505	606105	585573	794152	650636	1.26373e+06	0	0	0	0	0	0	10724.3	0	0	0	593599	598988	578016
1145	257.403	469.166	38962.8	507596	107878	44340.1	245126	331264	621588	78836	108704	0	163764	234873	91402.2	170016	79258.1	55544.3	99566.6	233029	58741.6	18128.3	173888	62535.7	188748
1146	167.517	462.295	633237	4.05845e+06	2.64312e+06	1.92003e+06	3.92317e+06	122629	3.27248e+06	2.21984e+06	1.87982e+06	2.20084e+06	2.17387e+06	1.224e+06	1.35481e+06	171222	964070	3.66318e+06	1.03508e+06	2.39034e+06	1.80389e+06	1.78679e+06	1.83947e+06	2.23632e+06	1.80257e+06
1147	143.595	431.223	126648	0	0	0	164538	0	0	111195	0	0	5.83725e+06	1.83815e+07	1.19447e+07	1.63387e+07	8.12094e+06	5.5461e+06	8.35767e+06	4.84936e+06	1.76133e+07	1.02684e+07	4.78103e+06	4.37529e+06	3.63588e+06
1148	182.924	273.083	2.00141e+07	6.32166e+06	1.72816e+07	3.26519e+07	2.26887e+07	3.01693e+06	1.64285e+07	4.13823e+07	1.3857e+07	3.88825e+07	1.38329e+06	9.53691e+06	1.264e+06	450984	3.92387e+06	1.40847e+07	9.87806e+06	1.97615e+07	6.57191e+06	2.00253e+06	1.703e+07	1.52338e+07	1.55802e+07
1149	387.697	541.113	59154.8	1.53647e+06	1.83803e+06	433775	988644	326989	0	1.91261e+06	937641	0	140567	600845	525240	86294	9960.03	1.00341e+06	148748	396423	811226	605911	850419	920742	732566
1150	378.681	317.119	1.025e+07	324040	162469	128058	205309	278962	656711	338609	212801	0	21795.2	0	8081.04	0	9757.57	0	0	9544.87	0	10562	810548	774721	697359
1151	317.434	533.253	0	0	0	0	58762.2	0	0	0	85030	0	226039	825958	381525	351425	78737.8	330025	287073	179499	544044	414185	211051	168568	85561.7
1152	300.468	657.327	142203	64307	26475.2	76160.9	108203	58159.3	116623	117492	0	0	410452	1.13075e+06	430226	376974	48336.6	318584	280519	223825	499951	475168	201286	133935	123709
1153	371.406	286.174	0	0	0	0	0	0	0	0	0	0	514491	0	480384	5.01987e+06	0	286898	17859.1	2.45981e+06	1.71016e+06	3.75354e+06	474024	566040	309888
1154	301.464	362.104	510568	52572.7	919421	251042	247749	52925.7	316943	319202	160744	475367	0	87534.2	0	0	0	0	0	25676	285783	0	380967	340963	276417
1155	87.1697	497.234	4.43565e+06	4.27522e+06	2.12726e+06	1.87461e+06	5.21874e+06	3.85943e+06	2.20693e+06	7.43924e+06	2.57281e+06	2.54449e+06	1.03731e+06	2.59912e+06	1.7716e+06	3.01327e+06	1.21931e+06	670518	1.00169e+06	795680	2.42714e+06	1.13932e+06	3.10045e+06	3.10406e+06	2.46454e+06
1156	420.371	531.166	1.20824e+06	165698	958373	2.91033e+06	787482	815379	2.3969e+06	95228	88369.5	846001	23931.5	0	0	0	0	0	0	0	0	0	728504	797341	748873
1157	163.009	484.28	78355.8	877736	1.89721e+06	4.3243e+06	4.33674e+06	0	1.37196e+06	734257	2.64901e+06	5.48445e+06	550895	1.08528e+06	591574	462611	876981	4.08716e+06	1.332e+06	4.02825e+06	1.41089e+06	776153	2.13368e+06	2.01752e+06	1.75829e+06
1158	315.859	305.119	294430	173965	167736	347168	91128.8	77734.7	168178	143250	73858.7	126167	948554	1.8569e+06	1.21907e+06	762106	256489	289006	846452	289343	1.0147e+06	1.15286e+06	356439	386797	291197
1159	302.314	525.249	0	27844.6	32984.6	51968.8	28726.6	80506.7	0	62733.6	0	60348.4	890765	2.21525e+06	855326	756620	127940	750256	641914	461751	1.12245e+06	957272	437414	510870	204200
1160	446.493	439.139	962981	167072	3.00207e+06	7.32856e+06	3.8291e+06	2.06537e+06	1.51347e+06	4.34407e+06	339182	175413	3.7365e+06	7.32137e+06	7.50784e+06	3.00454e+06	6.47555e+06	1.2395e+07	440749	5.74615e+06	8.26803e+06	9.33642e+06	6.3668e+06	5.69677e+06	5.30283e+06
1161	63.9659	156.076	5.07641e+06	79772	4.29406e+06	1.42691e+06	490613	1.03584e+06	903824	597436	1.78928e+06	1.84828e+06	771585	407347	385672	1.35164e+06	677567	1.02869e+06	0	471884	705567	1.0185e+06	1.28367e+06	1.39507e+06	1.62541e+06
1162	295.764	429.135	1.28542e+07	6.31003e+06	1.07904e+07	7.98095e+06	2.0818e+07	1.73776e+07	1.21688e+07	2.2521e+07	1.43368e+07	1.54893e+07	2.71421e+06	4.70731e+06	2.17428e+06	2.64592e+06	3.49784e+06	5.5121e+06	4.43662e+06	8.82988e+06	4.05645e+06	1.71318e+06	1.44674e+07	1.74272e+07	1.499e+07
1163	234.41	499.139	204356	1.28268e+06	434330	752487	92723.3	1.05397e+06	1.16044e+06	325802	70612.7	155977	0	0	0	0	0	0	0	0	0	0	251928	292590	386068
1164	324.764	711.315	0	0	0	0	0	0	0	0	0	0	286552	815710	307631	133801	74668.2	268549	162911	114885	470194	583277	127308	138974	123802
1165	446.702	455.113	115682	31184.6	476231	968845	698704	1.57711e+06	203417	774082	143694	21624.6	212462	708322	479864	179793	416510	1.32525e+06	6430.38	618174	786134	568408	930430	773376	732811
1166	356.644	427.119	1.44407e+06	435864	703475	827448	756887	613866	868052	383315	122355	463276	0	0	0	0	9459.55	0	0	0	0	0	407957	447958	356329
1167	125.596	254.283	1.21445e+07	603938	4.04255e+06	318959	5.03232e+06	1.81426e+06	8.32615e+06	3.20739e+06	1.40843e+07	7.34326e+06	888376	5.4758e+06	399263	0	155980	3.63579e+06	1.29866e+06	3.65764e+06	1.39207e+06	845742	4.07668e+06	4.18921e+06	3.91169e+06
1168	377.385	409.129	3.53835e+06	506553	1.15755e+07	1.10223e+07	9.40505e+06	3.98192e+06	6.27475e+06	8.07647e+06	3.56979e+06	3.30771e+06	508741	685511	39393.6	111975	999723	428099	385074	1.90081e+06	414687	110145	3.71069e+06	3.95753e+06	4.01347e+06
1169	318.517	457.131	29409	273496	865514	376146	416973	367693	367667	296159	126533	415154	0	0	0	0	0	0	22654	0	32661.6	16447.4	159300	306038	162152
1170	121.061	467.243	334520	312496	63570.9	96336.1	189478	144491	97491.8	272877	72858.3	226847	845549	4.62769e+06	2.56574e+06	1.85375e+06	548991	333098	1.17231e+06	191394	2.89466e+06	2.71415e+06	371090	387486	171517
1171	378.392	361.148	8.10012e+06	382469	3.03463e+06	1.5192e+06	4.2197e+06	2.37807e+06	2.02197e+06	4.73569e+06	2.14288e+06	1.47207e+06	0	258379	0	218625	0	267104	0	213215	16550.6	42780.5	605139	599345	568809
1172	596.719	208.168	6.01557e+06	1.86639e+07	6.75921e+06	5.77895e+06	6.06916e+06	6.77557e+06	6.90777e+06	6.24367e+06	6.30108e+06	6.28258e+06	6.41858e+06	6.60019e+06	6.67419e+06	5.93138e+06	6.7026e+06	6.99131e+06	7.75312e+06	6.64506e+06	5.69155e+06	5.98108e+06	7.50896e+06	1.12863e+07	1.69807e+07
1173	210.834	575.213	3.09229e+06	646050	5.93712e+06	386202	1.64934e+06	2.74071e+06	4.86215e+06	1.20801e+06	807419	5.1373e+06	63154.6	44125.6	258440	350459	176001	99539.9	67663.7	59344.8	296609	124518	2.03154e+06	1.74868e+06	1.1718e+06
1174	272.498	572.231	2.45181e+06	442117	1.59987e+06	807295	1.58613e+06	1.76603e+06	1.53451e+06	659860	455648	1.28385e+06	0	0	0	0	0	87407.7	0	0	0	0	653017	754886	520661
1175	374.606	333.114	1.87508e+07	1.00099e+07	8.95856e+06	6.36179e+06	1.20163e+07	7.44051e+06	8.65839e+06	1.31009e+07	4.72542e+06	1.42935e+06	4.07729e+06	1.78975e+06	1.80635e+06	1.4015e+06	1.87424e+06	1.99256e+06	5.45677e+06	3.25659e+06	1.65319e+06	738252	6.65321e+06	6.3587e+06	5.89944e+06
1176	235.857	397.108	553765	2.22506e+06	532587	2.10778e+06	1.01724e+06	1.04875e+06	2.0809e+06	497558	973982	332735	0	0	0	124959	326916	0	71494	0	0	0	494517	546164	590040
1177	301.077	629.274	81949.4	0	0	0	0	0	41331	24264.9	0	0	192491	769347	189825	196531	21780.7	182166	52500.8	68432.4	388438	157709	134321	34666.7	82756.2
1178	386.796	406.13	1.0513e+06	706609	634059	1.73521e+06	3.81094e+06	1.47247e+06	2.35835e+06	665037	1.73079e+06	2.45977e+06	362197	554446	877387	76268.6	347440	2.73556e+06	303611	4.03302e+06	1.08978e+06	1.36401e+06	1.27019e+06	2.43047e+06	1.23928e+06
1179	308.701	469.202	0	0	0	0	0	0	0	0	0	0	1.49187e+06	1.40353e+06	324882	173768	134925	1.60832e+06	169334	1.47207e+06	406000	110723	150685	340693	48801.5
1180	295.198	132.101	4.50675e+08	1.43237e+08	2.2301e+08	1.95965e+08	6.8753e+08	8.96694e+07	3.78015e+08	3.2258e+08	1.50962e+09	2.32163e+09	1.44983e+08	8.4981e+08	1.5984e+08	4.81145e+07	9.39548e+07	9.6661e+08	2.67324e+08	7.41318e+08	2.83535e+08	1.25775e+08	6.36763e+08	6.01627e+08	5.73371e+08
1181	61.8094	261.129	2.20325e+06	648660	2.30834e+06	388402	1.01236e+06	6.28462e+06	612656	1.03333e+07	1.69495e+06	2.73691e+06	1.06238e+07	2.32965e+07	1.6304e+07	3.10837e+07	1.31634e+07	7.29699e+06	1.35906e+07	8.16153e+06	2.01491e+07	1.63396e+07	1.04522e+06	3.96129e+06	4.29706e+06
1182	146.06	286.309	8.48767e+06	1.02907e+07	8.36373e+06	9.75787e+06	7.1397e+06	8.42834e+06	9.83633e+06	9.49808e+06	1.43998e+07	7.78299e+06	1.25645e+07	5.09422e+06	6.74884e+06	9.03423e+06	1.09638e+07	5.83435e+06	9.85989e+06	9.24689e+06	7.91906e+06	6.73973e+06	8.76566e+06	8.90709e+06	8.70569e+06
1183	417.591	395.114	427411	118615	822108	318462	1.03362e+06	768483	475825	609086	126085	674548	47416.5	64690.9	28881.3	0	24736.6	538082	0	229898	127553	42762.2	609926	562549	555990
1184	226.351	414.319	720289	485338	1.1354e+06	161156	463027	160398	1.5145e+06	875818	5.11077e+06	2.97213e+06	76824.6	1.36053e+06	50150.5	15448.3	68550.1	121318	43398.3	208493	81147.3	178531	904782	799028	667560
1185	300.594	613.301	81298.2	0	24317.5	0	24634.3	0	0	48376.3	0	0	606929	1.46212e+06	521520	508115	185405	365199	394446	345655	612938	495802	291654	363451	232038
1186	343.831	599.244	0	0	11790.5	0	13631.3	0	0	0	0	92031.7	1.03581e+06	1.0829e+06	660162	89454.8	428506	1.39929e+06	443995	1.2159e+06	1.00661e+06	215151	325309	269005	272165
1187	305.033	453.17	62019.6	0	0	0	0	0	0	0	0	0	260394	500484	172033	210559	121494	181821	41060.7	137773	458491	214690	218878	67524.1	149203
1188	310.457	503.171	1.32234e+06	503266	179250	414195	566588	909906	379420	626198	249563	123276	13372.4	0	0	0	0	0	40023.2	0	0	0	431191	363026	295487
1189	262.515	299.108	237985	79536.4	82841.5	0	61228.5	196699	572764	13972.5	0	51033.3	1.10405e+06	1.43217e+06	1.53205e+06	525516	1.43006e+06	650094	922420	1.67704e+06	2.31068e+06	1.04722e+06	425431	461303	268975
1190	310.444	349.145	196407	263264	179156	54879.2	130248	224666	138089	274102	0	47387.8	1.19529e+06	2.9257e+06	1.45508e+06	1.21644e+06	457215	558055	1.23782e+06	461771	1.35463e+06	1.52935e+06	447001	567300	424162
1191	266.87	455.222	907681	711904	1.17935e+06	610721	719519	1.08883e+06	650224	123243	1.63307e+06	394575	7.89835e+07	5.51714e+07	5.7873e+07	4.7255e+07	1.79734e+07	5.08549e+07	3.57505e+07	1.01391e+08	6.26517e+07	1.3897e+07	3.05218e+07	3.44871e+07	2.22527e+07
1192	303.263	481.223	96380.9	0	135869	29743.5	0	178771	100793	274521	0	0	1.09211e+06	2.62663e+06	1.01926e+06	1.03327e+06	429876	900152	840242	511567	1.39529e+06	1.13269e+06	504406	538659	310489
1193	88.1765	352.249	0	0	0	0	0	0	0	0	0	0	50241.9	1.88687e+07	0	0	102115	118972	47848.3	39273.1	655750	0	336879	807833	867346
1194	366.507	270.214	7.65719e+06	4.97229e+06	7.47442e+06	1.04842e+07	8.31235e+06	1.14826e+07	6.55619e+06	6.08192e+06	8.20815e+06	1.41157e+07	1.84692e+07	4.87306e+06	9.78725e+06	1.51558e+07	7.59387e+06	1.7136e+07	1.08573e+07	8.35414e+06	2.36118e+07	1.34495e+07	1.96563e+07	9.66142e+06	2.3209e+06
1195	603.996	256.299	5.04478e+06	6.63542e+06	4.92952e+06	4.38059e+06	4.53469e+06	4.08544e+06	6.06986e+06	4.94035e+06	5.63836e+06	4.45486e+06	6.10673e+06	5.60295e+06	5.00139e+06	4.22496e+06	4.81436e+06	4.8692e+06	3.7622e+06	5.01399e+06	3.76837e+06	5.97525e+06	4.13932e+06	5.65295e+06	5.56359e+06
1196	352.402	143.081	6.39767e+06	8.37245e+06	4.19556e+06	5.01543e+06	1.15021e+07	3.2737e+06	4.94819e+06	4.99123e+06	5.02214e+06	7.86945e+06	2.35364e+06	2.06725e+06	1.36371e+06	1.23536e+07	2.10903e+06	5.07068e+06	2.25946e+06	2.76184e+06	2.58962e+06	2.00743e+06	6.10508e+06	4.91047e+06	5.36664e+06
1197	250.014	469.239	38585.5	44032.5	0	61394.7	21803.5	22374	184765	0	109494	0	2.547e+06	3.10053e+06	2.90543e+06	1.69826e+06	1.22002e+06	2.47986e+06	1.69493e+06	3.68183e+06	2.93614e+06	789176	1.74292e+06	1.85614e+06	630021
1198	292.173	156.041	6.66071e+06	1.23076e+07	5.86889e+06	5.36309e+06	1.08936e+07	4.4748e+06	5.69808e+06	1.00851e+07	6.00424e+06	5.07207e+06	598070	336597	269115	277737	239515	1.838e+06	242242	1.23301e+06	568799	217691	7.76919e+06	6.12901e+06	9.09282e+06
1199	244.54	448.178	821284	605365	639877	863790	702792	678246	1.48026e+06	312505	695107	787659	0	0	0	0	138472	0	0	12634.3	0	0	609700	501020	426824
1200	469.501	420.184	121493	17911.8	992708	94230	125551	138827	182325	179011	635020	507568	0	23202.4	0	0	0	39769.7	0	0	0	0	224168	241682	269715
1201	109.3	142.049	8.24157e+06	9.88665e+06	1.26148e+07	3.64396e+07	2.69126e+07	1.80025e+06	1.47101e+07	1.17346e+07	1.26585e+07	1.26228e+07	179131	343555	861512	0	724039	289643	288157	59451.8	915567	443167	7.39861e+06	7.74668e+06	6.64187e+06
1202	179.911	351.146	2.33367e+06	995108	1.78215e+06	1.41626e+06	492203	1.67611e+06	1.55218e+06	1.20052e+06	1.65595e+06	1.67593e+06	0	0	0	0	0	0	0	0	0	0	879109	805340	696187
1203	381.228	99.0552	1.00167e+06	1.47459e+06	482993	814816	1.37245e+06	206619	1.00665e+06	591478	3.26816e+06	2.2947e+06	916807	1.68706e+06	1.42077e+06	471814	862630	2.58985e+06	1.81128e+06	2.7702e+06	776908	369530	1.41736e+06	1.41686e+06	1.75734e+06
1204	282.471	159.091	635165	439607	825707	1.52959e+06	5.84187e+06	202977	380594	605633	1.16346e+07	1.97957e+07	136963	3.10885e+06	114003	399467	390044	4.54826e+06	774646	2.73892e+06	573208	238796	1.79842e+06	2.3427e+06	583735
1205	423.974	480.168	216930	75770.6	303133	150428	154801	165577	326526	74581.7	63276.2	112304	0	0	0	0	0	0	0	0	0	0	82444.3	158840	110154
1206	191.534	238.143	5.01626e+06	2.2158e+06	4.53565e+06	1.3456e+06	2.0397e+06	4.24041e+06	2.9953e+06	2.48881e+06	2.66696e+06	2.81113e+06	1.05009e+06	678377	1.23219e+06	203814	1.33072e+06	1.81752e+06	1.02747e+06	1.63672e+06	4.44968e+06	720425	2.83182e+06	2.49517e+06	1.95099e+06
1207	301.434	569.274	111392	27069	26206.9	22316.3	34850.7	0	40860	60667.3	0	0	771490	2.03621e+06	647520	651322	141092	571277	451526	368114	815692	695208	451822	446117	373210
1208	371.895	443.148	937085	705005	649914	482149	1.2346e+06	472178	523376	1.07887e+06	297437	61285.4	28357.9	99248	0	0	26954.8	0	0	0	0	0	411619	468258	497317
1209	274.818	501.156	0	0	0	0	33098.8	0	0	41050.4	38416.6	0	1.04807e+06	337280	529949	615248	503641	1.88562e+06	952924	714369	394398	911818	180074	223651	154130
1210	250.342	485.212	0	0	0	0	36062.5	0	0	0	0	0	339349	314131	311944	153015	109978	471704	175449	745576	542987	14643.3	346810	266493	176714
1211	442.605	314.169	0	0	0	0	0	0	0	7183.19	31198.9	28572	102908	112378	18399.9	6.38857e+06	8676.1	257538	7801.73	45564.7	102374	561551	654035	627736	598023
1212	87.6855	242.283	4.25618e+06	4.74119e+06	7.56392e+06	4.39166e+06	2.63514e+06	4.98985e+06	7.5095e+06	4.18953e+06	3.47743e+06	0	0	0	0	0	0	0	0	0	87994.3	0	2.43256e+06	2.41758e+06	2.41347e+06
1213	340.221	477.171	0	0	0	0	0	9496.94	0	14061.2	0	0	101633	534976	158897	89320.9	34600.1	93041.4	153025	89947.3	390477	180313	99783	83999.1	113625
1214	461.01	386.212	6083.14	0	11091.2	614850	10913.3	0	0	0	1.09277e+06	2.40408e+06	0	1.68883e+06	0	0	23882.7	322841	0	0	164616	0	325682	313866	334883
1215	435.934	317.191	338971	8518.65	116117	274352	539489	46104.2	104250	58532.8	445839	894862	90551.6	327681	48232.4	0	20696.9	670803	42889.7	368984	357126	17651.8	313334	276055	340278
1216	458.44	261.154	139693	0	0	0	47161	0	0	0	180482	370809	0	2.25607e+06	0	88656.2	0	610912	0	216318	23291.3	55845.4	165892	155401	145625
1217	345.225	383.092	244157	228003	528677	434726	721826	509592	1.10614e+06	326526	125183	283217	842891	83573.5	808567	783873	656773	304475	318609	250200	723694	402481	443004	570063	335545
1218	396.507	311.122	328246	402297	1.04047e+06	2.24528e+06	277554	367494	417579	484526	857683	272702	317833	0	0	58750.4	64913.4	0	0	0	0	10968.1	300701	296367	311359
1219	348.742	591.165	530437	0	288042	12570.9	87661.8	103809	166430	135897	49073.9	400151	0	0	0	0	0	0	0	0	22286.8	0	101767	107981	97719.9
1220	207.138	372.309	2.42361e+07	1.3055e+07	9.47816e+06	1.16136e+06	7.73815e+06	3.9955e+06	1.78732e+07	4.74455e+06	7.12351e+07	1.76538e+07	1.27329e+06	9.26008e+06	2.02949e+06	1.70991e+06	2.42496e+06	1.58628e+06	3.20435e+06	1.09045e+07	1.05037e+06	2.36885e+06	1.24406e+07	1.22526e+07	1.01385e+07
1221	424.731	361.181	3.47095e+06	0	471489	250531	225113	382055	732248	110456	504530	564480	70753.4	441857	27172.9	0	0	175448	7956.99	164269	43340.9	0	419858	394074	422570
1222	198.874	501.156	240829	0	882778	188530	838356	621266	271659	742394	866417	741102	2.00255e+06	3.92658e+06	2.82634e+06	4.36309e+06	1.23528e+07	4.01276e+06	6.2756e+06	5.51991e+06	2.26147e+06	3.20662e+06	698897	754953	694955
1223	231.209	302.206	4.52623e+06	2.22701e+06	3.35809e+06	3.58025e+06	2.73997e+06	513131	513061	276145	2.37036e+06	2.28551e+06	669592	506930	93798	121382	168165	1.19375e+06	74205.7	451984	564967	61982.3	1.25355e+06	1.35673e+06	1.08157e+06
1224	340.221	511.103	0	329954	739591	951415	210709	166093	0	690984	32515.9	0	1.12419e+06	578788	1.42962e+06	714412	275211	670465	513988	217285	1.07059e+06	2.52725e+06	441652	381800	422340
1225	264.23	458.2	897810	988029	861908	652942	159183	485184	1.30702e+06	961788	370945	5.00122e+06	34811.8	0	36169.1	39078.8	0	0	59554.1	28378.4	67775.5	0	771814	669273	581954
1226	391.937	156.065	2.59064e+06	2.35935e+06	7.21891e+06	2.31231e+06	2.67507e+06	889520	2.4941e+06	2.32414e+06	3.95492e+06	9.14473e+07	739349	1.0698e+06	1.24179e+06	1.80861e+06	1.19125e+06	808031	1.65838e+06	1.08955e+06	1.67265e+06	1.107e+06	2.42635e+06	2.11249e+06	2.39161e+06
1227	439.462	380.093	0	93586.8	220625	128169	427808	0	74790.1	139086	208605	15334.8	0	0	93127.6	117425	0	9740.95	0	0	236486	162884	412689	384835	435113
1228	251.966	555.275	73862.2	0	30566.5	14806.4	0	166554	112637	28853.6	0	0	315622	234692	209740	93923.3	27295.9	236454	76795.3	538524	201050	19868.4	146122	194565	14653.3
1229	139.649	228.267	4.2324e+07	3.84227e+07	2.407e+07	1.76382e+07	3.84416e+07	3.59587e+07	3.14164e+07	4.17779e+07	2.17161e+06	496994	211242	200020	109024	337468	240808	3.79016e+06	4.77439e+06	1.41991e+06	203496	0	1.64598e+07	1.56644e+07	1.57522e+07
1230	37.0142	146.117	1.5535e+07	7.84321e+06	3.45598e+07	2.22468e+07	1.2215e+07	1.54813e+07	2.01008e+07	1.30942e+07	1.64766e+07	4.15977e+07	0	2.14299e+06	349007	797956	165241	6.4934e+06	0	3.86212e+06	2.03405e+06	0	1.21961e+07	1.24319e+07	1.06577e+07
1231	230.505	422.3	504799	19344.9	55769.8	0	93981.4	2.46375e+06	263082	155546	836047	1.08639e+06	22445	600108	56474.1	70173.1	0	261628	17962.2	78179.4	22719.7	18088	406090	308476	346909
1232	234.126	623.321	0	0	0	0	0	0	0	0	0	0	77019.4	254779	243417	251392	113270	79598.5	179465	17380.4	325266	196309	84225.3	75774.4	78193.8
1233	132.424	412.318	0	49197.9	0	0	0	42860.7	55320.6	582845	1.35715e+07	7.17802e+07	1.63129e+07	1.43165e+06	379514	47198.2	1.04549e+06	312194	204471	456634	740349	2.59326e+06	4.65818e+06	4.78634e+06	4.64198e+06
1234	320.268	134.117	1.00057e+06	561159	710739	533781	386308	1.37883e+06	780256	709100	197200	1.44947e+06	3.44394e+06	486067	430438	734804	2.98677e+06	211424	5.75778e+06	1.2526e+06	8.87906e+06	735884	1.34771e+06	1.43444e+06	1.49984e+06
1235	231.315	129.102	9.12682e+06	2.97739e+06	4.4117e+06	5.86409e+06	4.67956e+06	2.78404e+06	3.14125e+06	2.05491e+06	3.05836e+06	4.1594e+06	888988	2.75349e+06	2.05272e+06	675402	646655	1.98054e+06	753100	1.37321e+06	1.52731e+06	2.79792e+06	3.11437e+06	2.87e+06	2.8148e+06
1236	251.452	192.085	456032	80682.6	2.84098e+06	289717	1.6687e+07	175978	3.626e+06	1.15444e+06	4.6411e+07	2.04688e+07	209923	8.37574e+06	1.74476e+06	299236	1.27255e+06	1.2618e+06	1.54e+06	9.16443e+06	689537	202787	411365	234891	1.39501e+07
1237	94.2095	214.252	1.14459e+07	1.0721e+07	1.82726e+07	8.27863e+06	7.67389e+06	1.02488e+07	1.90412e+07	1.01315e+07	9.02146e+06	1.26148e+06	0	503768	65538.8	0	38069.3	213183	46051.1	79880.2	821705	35691.3	6.67433e+06	6.70603e+06	6.7095e+06
1238	413.978	657.182	0	8552.85	78310.2	358004	159052	330456	0	495612	79153.2	0	65947.7	842384	1.0921e+06	26195.1	7999.44	608435	595440	106239	492745	237849	293145	244248	159979
1239	57.3207	288.288	2.20471e+07	2.56406e+07	2.3183e+07	2.48766e+07	1.8422e+07	2.72849e+07	2.77986e+07	3.30598e+07	1.71136e+07	2.69521e+07	1.99447e+07	2.11106e+07	1.76886e+07	1.96138e+07	2.50267e+07	1.5168e+07	2.52537e+07	2.48459e+07	2.23317e+07	1.90347e+07	2.3893e+07	2.37921e+07	2.25172e+07
1240	294.969	538.246	2.32126e+07	1.59447e+06	8.64639e+06	3.46582e+06	1.33386e+07	3.87634e+06	8.96409e+06	8.01351e+06	1.67821e+07	4.49275e+07	208526	894251	158118	59102.6	103419	1.16352e+06	328052	1.32098e+06	487507	26737.5	1.15544e+07	1.23188e+07	1.03681e+07
1241	297.85	508.237	1.86802e+06	325513	608985	973716	1.73261e+06	442351	1.3732e+06	391319	900845	2.5378e+06	0	0	0	0	0	0	0	248027	0	0	911824	1.25443e+06	825649
1242	210.681	605.222	3.55903e+06	425243	3.33581e+06	0	913620	747594	2.26984e+06	1.92284e+06	784386	6.52258e+06	0	0	0	38609.2	0	27723.2	0	0	0	31794.3	560770	1.14863e+06	1.38039e+06
1243	176.097	150.075	1.70775e+06	157617	2.45603e+06	2.60599e+06	1.09232e+06	2.52807e+06	825555	1.67851e+06	459141	899247	1.03505e+06	1.30228e+06	1.19807e+06	3.65316e+06	1.90179e+06	1.29198e+06	1.35281e+06	908590	496538	3.04573e+06	1.09784e+06	1.25729e+06	1.98659e+06
1244	33.2109	376.257	1.12593e+07	502440	1.79355e+07	1.35698e+07	1.39236e+07	626704	467739	1.41059e+07	1.72571e+07	1.07174e+07	4.90536e+06	7.81715e+06	9.21968e+06	7.36592e+06	6.60949e+06	6.58894e+06	6.08243e+06	7.60686e+06	7.28907e+06	1.11314e+07	9.25136e+06	1.03859e+07	1.08771e+07
1245	419.877	192.122	2.41154e+06	1.62735e+06	3.00329e+06	1.43146e+06	1.22587e+06	2.3899e+06	2.33632e+06	1.28097e+06	1.62345e+06	2.07177e+06	59124.6	0	0	58674.2	76963.7	17429.9	72425.7	15141.6	276279	22807.3	1.24081e+06	1.11797e+06	1.47743e+06
1246	395.638	269.109	235141	40087	199985	0	798613	412381	204797	92457.6	1.32849e+06	5.12661e+06	25806.5	800505	10003.1	8598.06	18224.4	2.44897e+06	26926.4	551974	126971	0	503207	477011	392537
1247	379.187	129.065	6.49681e+07	8.15147e+07	5.35898e+07	6.46457e+07	1.12813e+08	4.48403e+07	4.71136e+07	1.24538e+08	9.09679e+07	5.29263e+07	3.46671e+07	5.1991e+07	1.26686e+07	6.45888e+06	4.57507e+07	4.15487e+07	4.86587e+07	4.74036e+07	7.03549e+07	5.4392e+07	6.42097e+07	6.31389e+07	6.02749e+07
1248	352.072	268.152	0	10053	0	0	0	153120	0	0	0	0	389795	405622	141368	143278	1.2426e+06	2.71573e+06	902725	50976.5	2.63744e+06	711958	343116	443028	427378
1249	270.284	527.214	0	0	0	0	0	0	142573	0	0	0	364673	436978	753065	771404	1.38333e+06	818166	496657	1.26173e+06	710514	140303	214987	185831	116293
1250	443.496	348.163	1.13254e+06	1.25019e+06	581812	727009	105391	1.10732e+06	1.574e+06	375360	354438	1.04544e+06	0	42867.8	0	30964.1	0	26795.1	0	0	0	0	474221	462701	398807
1251	301.444	300.19	659987	0	149580	97829.9	190009	0	0	0	37228.3	755480	783837	240613	639948	1.25808e+06	611393	1.25649e+06	869562	225226	2.75365e+06	182199	317445	312441	317350
1252	376.505	539.228	75666.7	82831.7	57758	0	91003.4	101771	33622.2	109810	0	28144.7	177723	574566	97454.2	85446.7	21590.2	45011.7	85763	30260.6	315185	231743	109701	105166	126421
1253	536.983	189.158	7.33577e+06	5.80916e+06	5.63779e+06	9.1258e+06	9.85498e+06	2.66315e+06	3.86778e+06	1.38928e+06	1.94444e+07	7.71169e+07	767824	6.49243e+06	705934	519147	5.96025e+06	1.08635e+07	337631	9.78006e+06	2.49925e+06	2.10025e+06	9.52034e+06	9.66606e+06	9.6818e+06
1254	58.1469	204.123	2.12695e+07	155082	200149	0	860860	1.19405e+06	2.01399e+06	879366	581347	1.4852e+06	62963.6	190542	84530.6	243955	0	780512	84886.2	0	136853	75463.8	1.75796e+06	1.80772e+06	1.53405e+06
1255	85.4839	286.272	1.57029e+08	6.89714e+06	4.19778e+07	1.66377e+06	1.28111e+08	2.07194e+07	1.14138e+08	7.44797e+07	1.65629e+08	7.6169e+07	5.25884e+07	1.5319e+08	1.46374e+07	858386	5.24315e+06	4.31087e+07	2.14916e+07	7.48582e+07	2.48778e+07	9.65335e+06	6.80505e+07	6.97301e+07	6.52396e+07
1256	188.996	126.054	1.4962e+06	3.18873e+06	2.12584e+06	4.17676e+06	2.31062e+06	1.35642e+06	2.25606e+06	1.72311e+06	2.43315e+06	4.7561e+06	345167	238349	597665	759926	203398	853535	0	300772	1.15875e+06	740412	1.45766e+06	1.34692e+06	1.79722e+06
1257	222.277	510.39	4.19934e+07	4.33835e+06	1.07612e+06	4.03425e+06	2.69035e+06	1.34082e+08	1.21927e+07	3.46089e+06	3.07606e+06	8.79224e+06	407761	4.27991e+06	422894	148021	240336	2.8663e+06	397050	1.04077e+06	1.00229e+06	238005	1.13275e+07	1.00824e+07	1.05717e+07
1258	111.738	613.338	1.05443e+06	1.81821e+06	1.12171e+06	658924	1.21941e+06	1.273e+06	1.4988e+06	3.53451e+06	1.34408e+06	399332	445540	1.27476e+06	877091	647981	269083	250589	369456	96045.9	859983	472403	793704	1.00631e+06	1.34816e+06
1259	142.73	454.298	0	0	0	0	130353	0	0	41382.1	48454.8	0	1.55643e+06	6.20295e+06	3.8095e+06	3.99312e+06	3.71913e+06	649639	894208	1.82812e+06	2.55183e+06	3.0093e+06	229901	2.5104e+06	3.50907e+06
1260	323.37	262.164	6.03843e+06	1.5889e+06	5.74117e+06	1.31098e+06	3.97039e+06	2.42865e+07	3.13833e+06	3.47528e+06	1.60132e+06	729961	2.57858e+06	842985	1.31063e+06	898743	482447	3.47195e+06	1.09114e+06	3.89991e+06	834415	1.87737e+06	3.74905e+06	4.13225e+06	4.30304e+06
1261	226.03	482.358	2.28811e+08	1.80253e+07	6.36712e+06	4.72002e+06	1.30751e+07	4.5907e+08	5.10845e+07	7.86602e+06	6.98835e+07	4.9627e+07	1.46576e+06	1.89724e+07	1.55634e+06	132842	688000	1.27088e+07	1.78212e+06	2.24935e+06	1.11657e+06	1.06342e+06	4.73224e+07	4.47158e+07	4.26605e+07
1262	232.043	331.232	0	0	0	0	416193	120069	0	0	0	0	230052	145973	270644	359092	157151	2.18687e+06	100631	217630	1.26484e+06	60630.4	228770	222932	266435
1263	350.243	417.243	1.1615e+06	0	1.70255e+06	94208.9	4.46788e+06	821997	978254	539912	2.24786e+07	9.01002e+06	59145.9	1.92203e+07	452655	0	45790.8	3.90584e+06	1.54787e+06	4.63421e+06	1.07273e+06	279470	4.60279e+06	4.51774e+06	4.38466e+06
1264	355.899	303.153	144962	94834.7	10172.5	250958	343305	0	108378	73223.5	212912	2.41949e+06	0	614216	9737.5	0	0	268222	92504.5	45127.6	0	17504.6	109830	142804	118126
1265	171.117	130.158	1.49238e+07	5.06223e+07	4.97567e+07	1.37855e+07	2.42614e+07	2.36835e+07	3.8522e+07	3.68885e+07	3.52288e+07	3.44865e+07	1.30441e+07	3.16836e+07	6.60801e+07	2.46274e+07	1.42896e+07	1.91666e+07	8.76883e+06	1.6975e+07	2.48432e+07	1.17495e+07	3.44991e+07	3.20525e+07	3.15096e+07
1266	298.743	415.098	1.15443e+06	1.72959e+06	983066	1.04403e+06	3.46491e+06	1.19065e+06	1.586e+06	1.45034e+06	775108	518528	0	109806	38243.2	134120	122001	42076.4	83947.8	631404	267376	0	1.41553e+06	1.27786e+06	1.29747e+06
1267	167.495	460.279	268072	977396	2.80126e+06	474361	1.96477e+06	137061	1.64019e+06	1.47983e+06	390373	279233	1.24744e+06	756668	968069	38282.6	254568	2.42444e+06	573539	1.23216e+06	1.7061e+06	771364	943237	868911	798150
1268	270.505	274.174	5.02334e+06	193161	1.82527e+06	1.11056e+07	2.0768e+06	656003	190220	167089	2.09726e+06	4.93708e+06	430343	1.56317e+06	501021	1.50804e+06	66366	2.74118e+06	166433	355762	874848	380283	1.04269e+06	1.02603e+06	916234
1269	110.056	314.267	1.74791e+06	385512	263596	0	85649.4	0	596428	348096	2.358e+06	656032	0	2.78004e+06	0	45524.1	0	0	0	30417.3	0	0	346182	301378	414018
1270	245.57	609.211	48319.7	84502.1	79119.6	208774	120561	203355	252856	282072	253996	71416	0	0	0	0	0	0	0	0	0	0	127497	106396	80074.2
1271	264.38	216.122	3.08151e+07	1.93472e+07	2.18859e+07	1.17924e+07	5.70341e+06	6.5995e+06	3.07501e+07	1.41361e+07	4.60884e+06	3.4102e+07	970414	265445	747165	572076	1.02347e+06	1.99133e+06	838777	564954	3.45683e+06	889983	1.63234e+07	1.5554e+07	1.44917e+07
1272	447.267	302.169	0	0	0	7727.92	21863.3	0	0	0	125719	408665	706159	947621	82951	6.43562e+06	7959.33	933731	243712	60982.2	2.47058e+06	505336	551429	534379	495378
1273	417.469	336.163	40665.3	13909.5	125837	93292.2	21984.4	92254.7	24859.3	31504.7	212974	150543	146332	0	32652.2	89695.2	183036	3.10966e+06	209477	83941.9	2.69082e+06	440537	501185	492802	491166
1274	321.2	625.316	0	0	0	0	0	0	42095.7	0	0	0	8.17538e+06	221413	1.86214e+06	1.61397e+06	434179	6.22071e+06	1.23814e+06	8.31067e+06	1.86149e+06	0	1.01737e+06	1.61992e+06	488610
1275	263.965	289.174	0	0	0	280744	0	0	0	0	0	0	924684	154108	682999	931518	486004	1.02139e+06	578767	135400	2.61212e+06	299009	160533	0	42118
1276	448.343	432.217	16646	0	767392	73635.1	1.89074e+06	137758	435429	423159	4.44903e+06	1.90353e+06	1.77449e+06	6.81991e+06	230294	14236.4	8553.34	1.08492e+06	195262	1.26523e+06	728437	99697	1.38864e+06	1.47503e+06	1.27838e+06
1277	386.474	229.153	1.69677e+08	6.92239e+07	1.54029e+08	8.30368e+07	9.35552e+07	8.74598e+07	1.03598e+08	6.95251e+07	1.09341e+08	1.17935e+08	1.2236e+07	1.86861e+07	1.19531e+07	1.22376e+07	1.70981e+07	1.82468e+07	1.86674e+07	2.64761e+07	2.92321e+07	3.40436e+07	7.88908e+07	7.33863e+07	7.86283e+07
1278	247.399	310.172	129724	81466.1	259550	1.9064e+06	713210	109573	35029.4	113318	708741	326074	360786	164538	165998	425296	113231	235331	232938	269203	51463.5	92111.2	234658	291943	182995
1279	117.398	99.0552	8.38565e+07	1.16625e+06	1.70406e+06	5.16398e+06	2.23709e+06	8.66718e+06	1.51579e+07	3.26809e+06	4.27324e+06	3.46813e+06	1.57421e+06	1.0914e+06	1.75376e+06	1.91581e+06	2.161e+06	1.66734e+06	2.0711e+06	931359	3.43045e+06	2.61538e+06	7.4656e+06	7.3763e+06	7.69263e+06
1280	393.928	345.223	1.09216e+06	0	268059	63512.7	1.11539e+06	0	0	0	586825	3.29637e+06	0	114906	0	0	8676.67	1.64845e+06	6840.36	584339	199373	21660.2	357307	314874	318633
1281	429.051	374.237	660618	0	0	450875	196375	0	0	0	51063.9	1.11396e+06	84066.7	201636	0	0	0	236867	0	88417.9	0	0	185790	110248	142014
1282	73.1607	292.164	0	0	0	0	0	0	0	0	0	0	2.08542e+06	2.08292e+06	2.01005e+06	2.95829e+06	2.73046e+06	3.72034e+06	1.18186e+06	1.73567e+06	1.12411e+07	1.50536e+06	1.43414e+06	1.12449e+06	854030
1283	250.312	327.111	5.16775e+06	19624.6	88946.5	0	25600.2	371649	8.10274e+06	13719.3	0	0	0	74594.3	18683.3	0	0	0	27209.2	48351.7	30519	18702.3	2.40108e+06	1.80817e+06	5.23787e+06
1284	191.476	358.267	1.15471e+06	0	116347	0	1.87128e+06	0	0	0	1.11741e+07	7.68657e+06	0	1.07374e+06	50362.6	0	0	638175	31507.9	277059	188888	0	974972	1.29423e+06	803458
1285	267.096	270.132	151784	0	831073	527473	91799.3	256141	295705	88425	97343.1	0	1.16798e+06	167361	414548	169166	1.78568e+06	2.07722e+06	1.43541e+06	2.15098e+06	1.9532e+06	1.23364e+06	639643	649247	588446
1286	481.593	288.154	0	0	0	0	0	0	0	0	0	0	0	57494.8	0	6.28232e+06	0	1.02957e+06	0	0	1.72614e+06	1.20331e+06	566465	536348	543293
1287	361.231	275.072	607331	89457.3	3.13833e+06	174612	4.25199e+06	1.0451e+07	258692	96963.8	1.61231e+06	3.3918e+06	98133.7	90203.3	772729	0	228820	224537	193926	67582.4	66254.4	0	1.05672e+06	987865	1.15535e+06
1288	89.0494	272.257	6.26183e+07	3.44656e+06	2.50069e+07	2.8867e+06	6.56517e+07	1.31755e+07	4.85021e+07	3.88532e+07	9.84679e+07	6.43181e+07	1.18178e+07	6.64857e+07	9.10054e+06	1.52226e+06	2.08691e+06	2.34161e+07	1.5916e+07	2.55502e+07	1.6645e+07	5.57639e+06	3.62082e+07	3.84302e+07	3.38458e+07
1289	137.776	318.277	5.44148e+06	5.27249e+06	7.10181e+06	3.89929e+06	3.16641e+06	5.0146e+06	5.85104e+06	6.10731e+06	361438	750089	64616.8	42977.3	0	0	0	42522.8	0	143568	0	90549.6	2.60962e+06	2.53429e+06	2.44705e+06
1290	415.554	388.253	1.32725e+06	108419	207523	184358	615607	163623	79997.3	90530.5	749392	1.55026e+06	72077.4	948687	43525.3	18787.7	44139.5	697454	14758.8	297051	119958	16293	432759	487688	446943
1291	337.423	419.14	0	0	14410.5	132153	161699	0	25960.8	20144.2	585630	804244	0	41634.8	0	0	0	352234	0	0	0	0	109888	128977	126317
1292	519.696	428.211	244185	14441.9	1.24273e+06	233203	553544	79877.7	47034	7071.12	59624.5	266404	52950.4	118437	85998.6	6366.31	40409.3	93142.1	31118.8	0	1.67832e+06	15336.8	327157	278289	328898
1293	379.173	493.171	159199	186581	403026	149779	253665	409914	174103	261320	395569	609335	25650.2	66302.7	15089.1	0	0	0	0	90362.4	0	0	185872	170942	149316
1294	438.505	418.169	20567.3	33732.4	618786	8458.63	90154.2	70674.7	47821.2	243463	593407	287242	0	84308.9	20833.7	0	0	0	0	11618.9	0	0	130739	117987	138324
1295	437.803	447.217	222163	0	558986	170254	1.26353e+06	92869.1	321942	91167.5	1.48883e+06	1.28225e+06	20598.8	642606	59518.6	0	0	346815	45538.3	245463	201685	9842.09	421109	342511	387343
1296	64.2703	370.275	0	279614	0	0	1.05097e+06	0	159611	0	9.74079e+07	3.60538e+06	0	3.69835e+06	333914	0	0	4.57164e+06	514983	1.41754e+06	0	0	5.26815e+06	5.48991e+06	5.39329e+06
1297	393.858	442.275	175896	0	53258.8	0	94219.4	0	22560.9	0	1.7351e+06	6.19394e+06	0	784476	0	0	0	1.87262e+06	0	2.64497e+06	490668	135612	423941	440597	441406
1298	186.982	313.153	7.84857e+06	0	607429	3.69375e+06	4.60861e+06	0	0	0	3.75064e+06	6.09775e+06	484913	1.02237e+06	0	3.98723e+06	2.41933e+06	4.97022e+06	197386	494783	1.19652e+06	54899	2.17498e+06	2.36917e+06	1.97209e+06
1299	89.0511	254.246	8.65386e+07	4.40464e+06	3.7522e+07	4.6422e+06	1.01342e+08	2.1129e+07	7.7402e+07	5.94708e+07	1.57085e+08	9.84428e+07	1.8423e+07	1.02882e+08	1.34007e+07	2.51474e+06	2.76945e+06	3.80907e+07	2.47766e+07	4.10666e+07	2.65454e+07	9.00155e+06	5.5921e+07	4.87741e+07	4.95527e+07
1300	305.209	368.143	0	0	0	0	0	0	0	0	43368.2	0	2.56815e+06	2.30227e+06	2.3166e+06	2.49003e+06	4.68974e+06	7.14978e+06	1.84481e+06	1.8735e+06	4.8088e+06	1.07479e+06	1.41262e+06	1.15421e+06	1.38359e+06
1301	250.53	292.164	0	0	0	25626	121348	0	0	0	47875.3	0	1.28061e+06	2.80389e+06	1.59787e+06	1.38245e+06	3.00685e+06	4.49239e+06	704269	1.23245e+06	4.47612e+06	353972	1.054e+06	994214	1.06509e+06
1302	241.261	373.242	5.56971e+06	40829.9	0	0	30687.7	0	0	91203.1	28735.4	0	285333	223743	1.20651e+06	4.41643e+06	736675	5.46179e+06	459464	1.34023e+06	3.95815e+06	66532.4	1.03006e+06	1.21128e+06	1.06095e+06
1303	245.423	478.189	927084	345173	1.08791e+06	445970	557768	451597	863838	439161	429250	657517	0	0	0	0	0	0	0	0	0	0	325874	336882	317371
1304	337.414	167.08	7.56111e+07	4.42524e+07	9.31535e+07	6.46785e+07	3.67817e+07	3.78838e+07	3.50427e+07	4.18717e+07	3.63285e+07	2.15444e+07	8.58092e+07	7.17434e+07	8.34801e+07	1.04834e+08	1.51012e+08	8.15542e+07	1.08109e+08	6.30823e+07	1.52587e+08	1.65275e+08	7.34612e+07	7.45459e+07	7.70524e+07
1305	196.734	343.294	1.00052e+07	7.34795e+06	1.02742e+07	4.5897e+06	5.63211e+06	8.97551e+06	9.53231e+06	9.75562e+06	4.72307e+06	3.14154e+06	2.71281e+06	3.40537e+06	1.47236e+06	2.39669e+06	3.42964e+06	3.63819e+06	2.26258e+06	2.33006e+06	5.68534e+06	2.40828e+06	6.55812e+06	6.18177e+06	5.9677e+06
1306	160.318	659.322	124519	0	0	221038	542353	75114.4	75805.4	310002	0	0	528299	1.42982e+06	320738	668427	659432	497962	372189	621374	1.49041e+06	901536	444183	261904	622235
1307	322.054	276.179	182187	48851.5	382220	114820	671548	1.30013e+06	330989	638811	395409	309203	296279	913296	257978	148346	25738.1	710197	331347	587367	422493	228316	690679	679658	554566
1308	414.017	305.147	0	58454.8	16616.4	60031.8	0	8182.94	13966.6	12522.4	0	0	489733	0	219704	0	242488	958562	502366	315469	761541	218669	106908	102750	154345
1309	430.405	389.237	523442	0	35433	57488.9	1.48504e+06	0	0	0	527198	3.56427e+06	0	508054	0	0	0	343293	0	656018	43451.1	0	402169	416488	329802
1310	227.962	583.305	0	0	0	0	0	0	0	0	0	0	1.52295e+06	360823	1.59631e+06	1.47747e+06	1.72854e+06	677521	1.47291e+06	1.34023e+06	908192	476720	242773	168192	227474
1311	239.317	229.106	74393	124540	109715	54843.2	0	52989.4	0	89697.8	84433.3	145345	604847	820102	782979	1.00036e+06	804092	1.04639e+06	707268	775640	1.04276e+06	623190	329540	345296	319124
1312	279.13	120.08	2.37278e+08	8.34119e+07	3.57067e+08	3.51282e+08	7.80019e+08	1.37671e+08	2.65574e+08	3.66856e+08	9.9349e+08	1.37167e+09	1.1512e+08	4.05774e+08	1.02504e+08	1.98195e+07	5.14331e+07	6.5345e+08	1.23681e+08	5.27958e+08	2.01022e+08	5.40982e+07	4.20184e+08	4.86313e+08	4.723e+08
1313	153.498	283.102	2.33742e+07	2.13424e+06	3.64485e+06	403325	4.85077e+06	914979	5.06681e+06	3.54424e+06	6.35612e+06	6.18933e+06	0	2.45509e+06	1.59751e+06	0	0	4.53046e+06	0	220675	1.66262e+06	1.3826e+06	3.90382e+06	3.57903e+06	3.89478e+06
1314	377.385	243.133	1.42682e+06	221790	702746	1.0588e+06	3.1456e+06	356252	824982	435221	4.19923e+06	4.92798e+06	90554	2.13947e+06	159898	331064	152740	2.72914e+06	562372	1.7464e+06	1.00906e+06	215987	1.81487e+06	1.5641e+06	1.71699e+06
1315	233.761	316.221	1.54537e+06	332267	981739	529221	5.15601e+06	83206.1	301927	172290	3.40599e+06	2.89892e+06	239156	194229	101964	26136.5	96353.2	911987	129633	704532	428743	82288	606309	635462	653816
1316	411.951	274.138	425691	65094.5	465455	2.01449e+06	1.12634e+06	1.01292e+06	1.78991e+06	354375	1.21767e+06	2.57951e+06	759532	470054	1.16774e+06	4.41413e+06	234462	5.5332e+06	170587	545597	1.03702e+07	166438	1.05114e+06	1.10444e+06	1.45447e+06
1317	30.9051	313.272	2.00807e+06	2.31878e+06	3.12044e+06	2.71708e+06	763530	2.27928e+06	3.53e+06	2.47277e+06	3.68093e+06	122410	3.40078e+06	4.14604e+06	1.21272e+06	3.73737e+06	1.95736e+06	5.23387e+06	1.99391e+06	5.08693e+06	5.23934e+06	3.14388e+06	3.76461e+06	2.58432e+06	2.74553e+06
1318	151.486	310.148	4.39227e+06	3.1999e+06	6.53085e+06	2.02335e+06	1.92515e+06	8.10379e+06	6.93518e+06	1.0856e+06	2.27424e+06	4.51927e+06	0	636834	0	0	0	0	0	0	87588.2	0	2.02579e+06	1.92121e+06	1.70559e+06
1319	112.918	268.091	140929	97377.4	1.07956e+06	0	42992.3	759467	0	109821	334718	220348	1.47931e+06	1.42365e+06	2.192e+06	2.03484e+06	4.95484e+06	4.17711e+06	1.06614e+06	1.19688e+06	5.12202e+06	1.80473e+06	1.54991e+06	1.49486e+06	1.35316e+06
1320	51.0902	313.272	3.05266e+06	2.77408e+06	2.94305e+06	5.14885e+06	2.85976e+06	1.69073e+06	4.70427e+06	2.64e+06	4.90155e+06	3.08249e+06	4.76561e+06	2.85395e+06	2.94457e+06	2.15492e+06	2.51287e+06	4.7066e+06	2.27663e+06	6.16833e+06	5.4959e+06	2.02106e+06	4.02186e+06	4.9556e+06	4.24781e+06
1321	411.341	348.127	413135	402758	842469	411744	461855	1.89978e+06	320579	954212	5.356e+06	953611	8454.78	78710.1	0	0	52787.3	618170	24742.5	11493.7	2.81041e+06	340425	1.15844e+06	1.0888e+06	1.11198e+06
1322	56.3862	174.148	870860	443969	1.25728e+06	1.48223e+06	751684	866692	791072	1.08863e+06	2.8401e+06	585810	4.85767e+06	6.77279e+06	5.17109e+06	3.95276e+06	5.22162e+06	7.70628e+06	4.0714e+06	4.80005e+06	1.44378e+07	2.34912e+06	2.96355e+06	3.24636e+06	3.01848e+06
1323	99.7546	137.095	7.26246e+06	3.81472e+06	5.86892e+06	3.33069e+06	4.21415e+06	5.59042e+06	6.9924e+06	1.47006e+06	2.79264e+06	2.94518e+06	2.28885e+07	1.32188e+07	2.31159e+07	4.61181e+06	2.45787e+07	8.57847e+07	2.23625e+07	7.18597e+07	1.65479e+07	2.8182e+07	1.89292e+07	1.80263e+07	1.51745e+07
1324	238.073	196.132	1.78957e+06	703288	3.64017e+06	2.30413e+06	993160	1.76929e+06	1.59133e+06	1.06349e+06	1.55205e+06	835972	2.97418e+06	1.87704e+06	1.65355e+06	901920	2.22847e+06	2.60509e+06	1.6294e+06	3.46229e+06	2.66327e+06	1.17967e+06	888364	1.04855e+06	967978
1325	447.292	393.189	31783.2	0	8144.39	0	755656	0	0	0	1.03085e+06	2.27243e+06	0	2.85274e+06	178617	0	0	140235	27113.5	140606	46376.7	0	480422	512570	401140
1326	425.055	347.19	272846	151174	698728	125129	516621	50226.2	192133	131478	752254	1.00972e+06	9688.95	227274	0	9371.42	0	110323	0	61907.3	46343.4	0	208762	207992	233784
1327	246.904	300.19	0	0	0	23162.9	14740.7	0	0	0	0	0	2.71213e+06	452298	2.3866e+06	3.55567e+06	897042	6.80237e+06	2.79444e+06	401205	1.66648e+07	1.07844e+06	2.9384e+06	2.85102e+06	2.14475e+06
1328	97.7833	156.065	1.24311e+06	2.84674e+06	2.24112e+06	1.22622e+06	967786	1.45736e+06	3.09493e+06	2.1546e+06	2.67677e+06	3.31927e+06	1.09374e+06	674581	654592	2.3084e+06	1.28711e+06	595727	1.44428e+06	1.39009e+06	1.22204e+06	935202	1.55427e+06	1.96013e+06	1.86909e+06
1329	415.811	685.176	0	31494.2	251072	248793	256554	367173	0	341302	46277.4	0	52299.3	63141.1	519518	48884.8	0	657729	79799.1	102464	398780	151454	276497	390442	336717
1330	266.608	526.312	2.65066e+06	4.3481e+06	448570	332334	1.04685e+06	2.20533e+07	506408	1.46505e+06	7.93005e+06	7.27559e+06	0	2.0301e+06	257892	27007.3	0	316668	0	141034	47060.9	0	2.9336e+06	3.00794e+06	2.99572e+06
1331	358.489	314.169	40959.2	24995.8	10223.6	231213	286155	0	17119.9	0	382070	567641	12033.7	33506.9	0	58131	12349.5	170853	0	49225.3	0	0	112327	107338	180775
1332	376.963	314.083	1.71772e+06	909079	1.56163e+06	454705	68849.9	3.14006e+06	838786	1.45541e+06	464648	2.63696e+06	90806.6	32996.5	0	27422.5	228191	104561	42335.1	0	2.23048e+06	42646.1	917616	1.02282e+06	981844
1333	208.63	196.132	76055.5	0	0	0	0	0	71292	0	0	0	3.3398e+06	1.47327e+06	1.90188e+06	0	4.03483e+06	2.31819e+06	1.94686e+06	4.19955e+06	2.27492e+06	1.19842e+06	1.28201e+06	1.24618e+06	1.00313e+06
1334	544.167	161.128	1.57608e+06	147559	79292.2	396003	1.19339e+06	140327	186608	224536	3.2629e+06	4.72012e+06	705510	5.96762e+06	220753	133601	131597	2.56515e+06	116897	393530	651093	639072	1.90041e+06	1.88695e+06	1.37965e+06
1335	229.476	269.146	46345.4	82827.8	269037	53144.1	157272	522866	149820	301808	471538	23972.7	197071	1.65401e+06	150350	161533	509616	145346	546023	1.08535e+06	884941	302187	457784	466977	311346
1336	84.6384	298.272	1.36782e+08	5.68497e+06	5.6311e+07	5.6841e+06	6.87443e+07	2.52541e+07	1.58681e+08	7.62031e+07	1.33498e+08	1.17669e+08	1.71245e+07	8.82012e+07	8.18435e+06	1.26492e+06	2.64541e+06	4.60916e+07	2.444e+07	4.80105e+07	2.06997e+07	7.00275e+06	6.44063e+07	6.30539e+07	5.87278e+07
1337	318.431	383.114	312898	1.2693e+06	695729	709449	433573	807777	552691	857042	361965	334221	1.1073e+06	288500	1.56229e+06	2.44416e+06	1.88876e+06	595082	1.79896e+06	762563	628074	1.01317e+06	722024	588294	514185
1338	550.371	357.247	777894	362531	1.06975e+06	1.08997e+06	1.89176e+06	398269	613124	362981	1.52672e+06	2.03996e+06	683839	406291	163825	23985.7	10379.8	728494	19310.9	637280	370939	650466	764825	789110	736124
1339	413.081	384.185	143410	0	45925.1	0	126758	0	12691.3	11797	1.8313e+06	1.87471e+06	0	2.10013e+06	0	160413	0	65355.6	0	198186	0	0	369227	392347	296595
1340	409.379	200.138	2.31454e+06	147123	1.32091e+06	838924	550525	257321	746549	456712	928884	3.38276e+06	1.39949e+06	1.31924e+06	259461	5.09118e+07	116550	854971	384159	394496	1.24895e+06	5.25162e+06	2.04309e+06	2.16037e+06	2.14097e+06
1341	231.086	440.312	2.81378e+07	2.20993e+06	5.74217e+06	984722	6.37901e+06	1.15507e+08	1.42422e+07	7.30477e+06	4.17755e+07	4.99125e+07	1.938e+06	3.41329e+07	3.59193e+06	1.21987e+06	758476	1.17218e+07	3.71121e+06	5.18024e+06	2.72973e+06	1.56232e+06	2.06337e+07	1.75734e+07	1.65157e+07
1342	351.808	427.194	0	11444.2	0	0	0	0	18142.8	0	0	0	421693	400095	393022	115875	580937	467406	326929	406965	1.03737e+06	493432	89966.7	126136	135422
1343	79.9562	314.303	8.37935e+07	7.00414e+06	1.29082e+07	1.56385e+06	5.41768e+07	6.00639e+06	6.47808e+07	2.01684e+07	9.29635e+07	4.67716e+07	1.65582e+07	8.33339e+07	5.06824e+06	579816	1.91949e+06	1.524e+07	4.77005e+06	1.43868e+07	5.4939e+06	6.96322e+06	3.12201e+07	2.90941e+07	3.28723e+07
1344	464.238	304.159	144421	0	0	0	720746	12146.6	14823.9	39697.5	1.54515e+06	2.58814e+06	70414.5	4.79861e+06	34107.9	2.22019e+06	0	1.63559e+06	15369.9	1.65754e+06	173646	0	737286	203757	576964
1345	262.141	524.295	0	5.10108e+06	3.13113e+07	2.80499e+07	2.76312e+07	606925	715465	9.4689e+06	1.08383e+07	2.01567e+07	554018	4.4218e+06	296392	73387.2	22176.4	2.81667e+07	532617	1.50861e+06	6.34427e+06	344727	1.24783e+07	1.28727e+07	1.22328e+07
1346	313.642	171.075	9.01594e+07	4.95788e+06	5.14675e+06	1.40566e+07	7.7954e+06	1.0625e+07	5.9201e+06	1.35147e+06	3.04696e+06	4.85343e+06	1.09728e+06	1.00234e+06	905811	1.09636e+06	2.58352e+06	2.70298e+06	2.20418e+06	704671	6.60533e+06	2.4048e+06	8.50892e+06	7.58732e+06	7.80833e+06
1347	377.44	359.238	687268	0	102505	100285	4.64033e+06	0	21995.7	0	2.74781e+06	2.94403e+06	108232	2.59082e+06	89279.1	0	0	1.38408e+06	92286.4	1.77925e+06	298131	107844	933415	786178	793570
1348	268.64	262.117	89941	42547.9	391941	1.99447e+06	4.6559e+06	27613.3	748907	152150	4.13464e+06	4.85285e+06	0	1.34514e+06	84639.9	24794.1	0	3.89759e+06	119755	1.35593e+06	613042	45988.5	1.58129e+06	1.86404e+06	1.40264e+06
1349	305.833	302.194	77065.4	233409	230886	27439.9	526095	1.12167e+06	131214	30605.7	46136.9	247123	43754	815442	23122.4	39318.4	0	252268	0	193957	374198	368759	237441	213128	175353
1350	358.096	529.342	0	0	0	0	546648	0	0	11879.5	17041.2	739629	0	0	7054	0	0	83255.2	0	157504	32978.7	0	47291.3	82636.7	67116.2
1351	270.21	471.187	0	28219.2	0	109049	0	67488.7	0	0	62730.1	0	318262	5.8103e+06	4.05957e+06	5.72289e+06	1.90997e+07	3.4131e+06	2.09413e+06	1.38871e+06	3.34358e+06	2.34683e+06	1.07475e+06	1.54742e+06	1.85635e+06
1352	412.895	607.161	795682	18568.2	11727.2	63213.1	121940	709274	960116	128649	56998.2	81080	0	0	0	0	0	0	0	0	0	0	130651	96583.9	127827
1353	323.972	245.123	194288	53212.8	0	0	235729	0	257934	472665	58253.2	0	484112	151145	217072	233597	112385	1.14897e+06	237204	1.42296e+06	576220	0	451040	384882	180650
1354	442.675	110.071	1.16088e+07	979336	1.64311e+06	1.62686e+06	1.51761e+07	481137	647256	1.28175e+06	7.38904e+06	1.23315e+07	617193	2.25127e+06	712036	631934	526410	1.02055e+07	385675	2.1651e+06	1.35968e+06	646907	3.56021e+06	3.39774e+06	3.2349e+06
1355	134.269	272.257	3.5633e+06	3.32931e+06	2.6073e+06	3.03103e+06	2.3262e+06	4.70614e+06	3.64707e+06	3.73429e+06	344022	220255	0	120633	36179.5	924423	0	0	0	178243	0	0	1.38217e+06	1.65837e+06	1.2983e+06
1356	261.848	666.432	365552	2.92314e+06	642097	1.09482e+06	915758	2.4329e+06	1.58608e+06	498840	1.15847e+06	477483	4.97756e+06	4.47213e+06	4.54362e+06	4.28895e+06	3.92222e+06	7.52949e+06	2.39133e+06	4.26456e+06	4.91287e+06	1.98875e+06	3.91492e+06	3.13303e+06	3.54221e+06
1357	90.2638	430.263	734345	1.17147e+06	1.69987e+06	2.02743e+06	3.2837e+06	1.65229e+06	831037	7.21782e+06	6.33537e+06	1.30452e+06	840992	1.05834e+07	3.07136e+06	2.81323e+06	404936	443284	854496	1.23512e+06	1.31158e+07	948455	1.87306e+06	2.49865e+06	2.80598e+06
1358	221.118	252.121	131823	99515.6	102513	0	35645.8	0	0	70127.5	169549	0	899032	0	426196	126143	123618	1.64046e+06	237970	997989	741833	102324	441669	393028	442419
1359	315.852	156.076	141489	50525.3	4.43719e+06	2.83237e+06	2.52462e+06	232741	184691	950415	3.15682e+06	1.40074e+07	1.37333e+06	458065	363820	1.07692e+07	171109	1.305e+06	510388	553091	665273	938756	3.08877e+06	2.37996e+06	1.75977e+06
1360	301.468	540.189	1.49575e+06	214615	1.78023e+06	190186	885610	1.35276e+06	710468	851026	393576	543671	0	0	0	0	0	0	0	0	0	0	422116	605906	481224
1361	397.357	561.262	336032	0	84064.6	0	26135.6	18110	13330.8	35713.8	1.18162e+06	2.47608e+06	0	80783.6	0	0	0	2.03085e+06	0	302020	0	0	182558	280724	172887
1362	417.081	472.285	25994.6	0	62002.9	0	1.34197e+06	0	16471.7	0	155705	3.5649e+06	0	613124	0	0	0	1.62085e+06	0	1.06253e+06	70058.2	0	691766	705970	613240
1363	493.706	320.179	0	0	0	0	0	0	0	0	0	0	301232	98683.9	162204	1.7024e+07	14699.1	1.11427e+06	0	12971.9	510611	1.3448e+06	1.70435e+06	2.0962e+06	2.35081e+06
1364	238.643	250.142	667217	479997	873044	165960	232231	510011	286593	213981	811617	482982	454106	257581	204255	68983.9	430756	453254	413036	706783	521099	98204.6	337684	373700	396200
1365	240.757	186.111	5.84575e+06	3.0607e+06	2.76719e+06	4.35747e+06	1.22744e+06	2.98363e+06	4.41986e+06	1.87285e+06	1.83453e+06	3.10095e+06	817688	545026	376073	690766	888414	1.31214e+06	1.01669e+06	410084	1.40647e+06	511018	1.94251e+06	1.97111e+06	1.79853e+06
1366	347.254	359.263	1.4582e+06	0	353984	220410	2.39833e+06	140753	25507	12758.7	1.39364e+06	3.60282e+06	240526	696123	109521	0	0	1.04478e+06	16482.1	600987	412992	15791.9	721430	732315	656211
1367	454.848	335.072	507459	62233	143917	8309.9	260968	287652	95585.4	31904.3	220568	418012	0	144472	0	0	0	213471	0	0	0	0	167954	202624	164209
1368	273.879	304.185	1.25463e+07	208689	1.73088e+06	6.44306e+06	1.09549e+07	583350	1.26479e+06	0	4.70548e+06	1.03447e+07	885213	862669	0	1.02338e+06	0	6.92039e+06	0	5.21487e+06	975752	0	4.50828e+06	5.0097e+06	1.98642e+06
1369	250.12	317.155	3.95721e+06	63971.2	17404.5	50408.1	25447	19950.9	379690	145810	39595.9	0	80642.9	125911	15014.7	37323.5	18955.9	124598	0	74284.7	44193.7	16079.3	300245	200138	265686
1370	188.785	210.148	377200	894992	154324	744637	242809	351557	337107	220253	333674	459037	5.67682e+06	4.48992e+06	3.66769e+06	1.22744e+06	7.54964e+06	4.98343e+06	3.4765e+06	6.77732e+06	5.82178e+06	3.17059e+06	1.25957e+06	1.61891e+06	1.82669e+06
1371	378.501	463.161	34641.5	60942.5	340435	170232	194131	301555	216952	62116.4	28934.9	33348.8	0	0	111022	0	0	0	0	0	0	0	71978.8	42344.8	59297.4
1372	398.992	347.227	466688	0	69267.4	334769	547060	0	0	11166.8	476430	1.72861e+06	0	212334	0	0	0	951863	0	182685	113666	0	197497	277061	369011
1373	282.506	130.097	4.79908e+06	6.00425e+06	8.23736e+06	6.34679e+06	5.2466e+06	9.35184e+06	1.54503e+06	4.60757e+06	1.96542e+07	1.00634e+08	1.67763e+07	3.67884e+07	1.23815e+08	1.1998e+08	6.38856e+07	2.05872e+08	5.886e+07	5.88182e+07	1.3633e+08	4.38959e+07	2.49125e+07	2.50115e+07	2.6947e+07
1374	110.806	412.413	7.4189e+06	1.49446e+07	1.99776e+06	758843	3.81515e+06	1.15679e+06	0	4.84679e+06	5.10721e+06	702449	2.43194e+06	1.34364e+06	68377.8	295477	0	640140	157996	222554	712765	2.23723e+06	2.74224e+06	2.32475e+06	2.51987e+06
1375	429.144	661.249	242327	78354.7	859479	213608	131058	120373	204150	207814	210499	47961.7	0	0	0	0	0	0	0	0	0	0	125840	153200	161944
1376	345.669	326.18	179656	0	215629	203211	5.78238e+06	0	0	48927.6	3.4677e+06	6.65972e+06	95299	1.99104e+06	79240.6	48590.2	0	1.62066e+06	84157.4	2.87199e+06	207334	88842.4	1.83687e+06	1.13076e+06	1.00832e+06
1377	265.831	276.133	1.13651e+06	329969	2.84695e+06	2.18362e+07	2.16479e+07	511368	3.33685e+06	2.00255e+06	1.74339e+07	1.80618e+07	510898	4.14006e+06	96075.2	37313.5	19977.3	5.17563e+06	548327	6.51176e+06	3.16835e+06	153230	6.95554e+06	6.08666e+06	4.87607e+06
1378	299.665	289.128	0	0	0	274350	87150	0	0	59823.9	679514	102651	75021.4	1.10988e+07	241914	0	726391	6.93473e+06	5.25745e+06	3.8298e+06	1.4512e+07	273663	1.45197e+06	1.35725e+06	1.43913e+06
1379	147.221	235.118	1.82705e+07	5.8354e+06	5.05341e+06	6.09875e+06	1.12252e+07	5.84796e+06	8.75959e+06	1.93389e+07	1.0389e+08	9.85189e+07	6.8255e+06	1.73548e+07	7.07528e+06	4.00302e+06	7.92181e+06	2.13375e+07	4.02447e+06	2.16307e+07	7.22191e+06	5.02251e+06	1.98741e+07	1.93248e+07	1.88786e+07
1380	309.536	363.088	501875	4.39039e+06	1.77294e+06	7.20239e+06	1.34927e+06	2.17919e+06	1.7226e+06	3.48287e+06	484387	297031	1.42463e+07	2.97418e+06	6.87201e+06	6.14312e+06	1.06581e+07	4.07175e+06	4.73752e+06	4.46969e+06	6.77209e+06	2.64619e+07	3.05518e+06	2.30646e+06	2.2078e+06
1381	390.145	332.093	1.24386e+06	276255	346532	9.06942e+06	1.38661e+06	717578	2.72449e+06	397667	378462	4.12138e+06	1.71793e+06	522486	26320.7	12539.9	91285.2	930274	0	154994	329337	0	1.46848e+06	1.58195e+06	1.42833e+06
1382	263.016	221.094	0	0	84803.5	2.39682e+06	5.12877e+06	0	574934	95813.9	1.66737e+06	727286	215728	67285.1	38031.9	43914.3	67163	5.32776e+06	71797.1	3.42527e+06	2.17929e+06	139455	1.42924e+06	1.46243e+06	1.16104e+06
1383	293.367	487.285	1.43666e+07	0	0	0	0	86180.4	1.0303e+06	0	0	0	0	0	0	0	0	88971.2	0	0	0	0	859582	833906	1.08769e+06
1384	159.472	230.246	9.72215e+06	9.9245e+06	2.08442e+07	1.07528e+07	1.27212e+07	1.21796e+07	4.00712e+07	1.69392e+07	2.59737e+07	1.37364e+07	1.25345e+07	7.42656e+06	5.71119e+06	8.65844e+06	8.95848e+06	1.11156e+07	6.79271e+06	3.76088e+08	1.55531e+07	9.5644e+06	3.47341e+07	3.07422e+07	3.34442e+07
1385	240.251	251.09	1.23994e+06	511556	2.02096e+06	739386	1.03838e+06	1.9627e+06	2.24934e+06	495255	450643	706835	255086	108663	144844	97340	123072	192261	40466.4	161438	105661	82079.7	730765	583175	648559
1386	320.383	248.111	989801	554312	3.61128e+06	1.06585e+06	824004	822825	898991	1.19642e+06	104022	222267	48233.7	0	0	29956.4	18442.4	1.40169e+06	0	267181	47263.8	0	1.04474e+06	889694	867299
1387	191.287	320.15	88373.6	297881	143160	284411	460770	0	0	0	3.02669e+06	89148.3	1.45597e+06	41844.4	350255	521652	158463	1.56775e+06	267045	2.43287e+06	2.17559e+06	118765	808236	732318	622945
1388	239.956	560.325	74891.9	18841.5	0	0	27104.9	0	0	69432.2	68725.1	0	149846	415862	334335	269918	208499	57276.9	214925	80312.6	495822	218229	197234	180051	83301.5
1389	415.666	317.081	0	69667.7	11379.2	0	612319	0	12081.1	102521	1.604e+06	2.08999e+06	0	1.31301e+06	16721.2	0	0	142007	0	154781	34981.4	0	206771	74388.7	304678
1390	378.279	256.116	2.54502e+06	248492	1.0948e+06	166933	258819	596394	296571	287033	432964	1.34285e+06	450570	967314	198795	104709	804905	616988	361340	1.18402e+06	956596	681644	649309	588133	369369
1391	306.581	388.216	382979	267050	116917	178381	71726.4	201856	220663	323103	0	0	1.65869e+06	3.37329e+06	1.90113e+06	2.28122e+06	768121	810194	1.57574e+06	645358	2.35481e+06	1.97897e+06	878351	878959	774802
1392	33.4337	109.101	2.86982e+06	2.91848e+06	2.19142e+06	985031	2.74349e+06	2.17046e+06	3.27324e+06	3.75978e+06	1.87982e+06	2.76603e+06	1.38285e+07	1.3751e+07	1.37773e+07	1.56785e+07	1.53038e+07	1.70421e+07	1.09251e+07	9.97236e+06	1.69584e+07	1.25504e+07	6.12353e+06	7.74721e+06	8.37217e+06
1393	295.153	424.179	8.30997e+07	1.0413e+07	3.93369e+07	1.51067e+07	2.40777e+07	3.91103e+07	3.03881e+07	2.59334e+07	1.58052e+07	2.87232e+07	544407	679112	450029	758768	1.06354e+06	988320	672332	1.15451e+06	1.48316e+06	397268	2.03631e+07	2.10117e+07	2.00464e+07
1394	231.302	366.2	1.21011e+06	47302.9	849387	2.70618e+06	1.75004e+06	64283.6	235809	58479.9	1.6158e+06	1.68795e+06	680046	410724	89676.3	58149	21260.7	1.07134e+06	36197.4	847649	326580	86659.4	762020	634097	602804
1395	216.697	283.079	3.40634e+06	1.65296e+06	7.62934e+06	1.66367e+06	1.69027e+06	2.15136e+06	4.83382e+06	1.83873e+06	1.65709e+06	4.80174e+06	0	0	0	0	26168.3	0	19769.2	0	0	0	2.11604e+06	2.14901e+06	1.96343e+06
1396	464.15	266.158	3.51169e+07	8.7508e+06	2.91526e+07	8.31395e+06	5.45305e+06	7.33176e+06	2.18663e+07	1.16337e+07	5.4902e+06	1.16863e+07	6.19046e+06	1.87912e+07	4.49869e+06	5.03971e+06	1.98652e+07	4.65041e+06	1.19999e+07	5.77185e+06	1.32506e+08	8.62291e+06	2.04144e+07	1.86846e+07	2.02278e+07
1397	310.638	516.196	852993	333679	885299	384953	102781	379790	299960	487054	498782	358848	14028.3	0	0	0	0	0	0	0	0	38106	296775	324715	210630
1398	227.703	468.343	1.67342e+06	1.04127e+06	2.8861e+06	857883	2.12632e+06	5.18644e+07	1.12297e+07	2.08951e+06	1.178e+07	1.10552e+07	1.55121e+06	8.67335e+06	776820	597635	423164	3.4727e+06	1.16566e+06	1.59994e+06	893333	508605	6.89636e+06	6.28232e+06	5.49809e+06
1399	288.113	280.128	1.43672e+06	73014.7	318603	1.89666e+06	2.73776e+06	84494	394459	241102	1.54092e+06	5.93706e+06	0	1.19442e+07	0	0	87937.8	9.45882e+06	90239.4	2.69033e+06	345487	204875	1.71085e+06	1.84502e+06	1.60489e+06
1400	319.43	532.289	0	0	0	0	1.2808e+06	0	0	0	888126	415894	0	0	0	0	0	2.38188e+06	0	2.70875e+06	217926	0	389722	348185	360090
1401	314.077	253.031	2.87725e+06	610968	1.19687e+06	2.62312e+06	3.33716e+06	2.55207e+06	2.08949e+06	2.28012e+06	4.08826e+06	4.50907e+06	892475	2.22276e+06	1.0673e+06	173265	366460	2.66404e+06	877388	2.9457e+06	1.19237e+06	846583	2.04265e+06	2.04904e+06	2.08497e+06
1402	434.086	468.291	0	0	0	0	473923	0	0	0	275116	9.97913e+06	0	49547.1	0	0	0	1.88839e+06	0	663583	105952	26279.2	751123	701280	662544
1403	129.213	421.147	1.57878e+06	827098	1.10055e+06	502082	1.93674e+06	1.93618e+06	1.48772e+06	533349	269376	490933	0	0	0	0	0	0	0	0	0	0	282154	328146	293831
1404	242.869	212.09	9.98589e+06	1.12104e+06	5.19552e+06	1.36613e+06	1.20484e+06	3.57825e+06	2.36775e+06	2.21325e+06	1.98911e+06	2.97914e+06	1.00659e+06	729278	813587	764782	1.82935e+06	2.15161e+06	451917	554512	1.56648e+06	908903	2.11047e+06	2.77646e+06	1.95681e+06
1405	330.169	308.039	43592.3	0	0	88946.5	550445	0	109422	77186.5	1.53637e+06	3.50778e+06	0	1.74111e+06	0	0	0	3.05394e+06	0	486973	0	0	686994	631388	570404
1406	33.4174	338.339	2.13006e+07	1.02544e+07	2.14929e+07	6.58626e+06	2.56683e+07	4.90222e+07	2.66563e+07	2.11675e+07	2.69162e+07	3.99624e+07	5.41229e+06	262719	144135	486201	2.53814e+06	1.53478e+06	385110	1.55173e+06	980346	5.33858e+06	5.90845e+06	6.11695e+06	6.07802e+06
1407	258.27	328.22	1.13041e+06	625805	857168	739662	1.14791e+06	933716	657472	1.35007e+06	2.52161e+06	4.25834e+06	440116	1.70655e+06	435482	296869	413851	2.07205e+06	292948	1.77049e+06	719529	347283	381521	611657	1.69313e+06
1408	416.464	110.071	1.55109e+07	654721	1.32981e+06	509107	2.18566e+07	365348	515595	1.01279e+06	3.91126e+07	3.48371e+07	446149	5.29781e+06	409922	471097	622561	2.65071e+07	332070	865540	506446	411342	9.45217e+06	1.40576e+07	8.60864e+06
1409	353.123	355.098	291567	0	175509	92316.3	377663	181636	166196	247691	328171	469208	14528.7	672273	0	0	25473	79267.1	0	0	0	0	192427	125942	165503
1410	162.713	485.283	0	68004.1	288538	916776	858437	0	0	77985.5	421627	1.39873e+06	56443.2	0	87950	0	34919.6	914098	229901	675768	138094	150775	421814	491836	428527
1411	262.109	339.288	829252	2.28141e+06	1.51653e+07	1.67533e+07	1.24717e+07	252176	583343	4.92509e+06	6.82508e+06	1.01022e+07	413311	3.72602e+06	451631	0	104711	1.76828e+07	387621	1.54948e+06	5.10228e+06	462441	7.10223e+06	6.71683e+06	6.88089e+06
1412	410.394	304.16	1.69545e+06	145098	9.7411e+06	735259	2.51961e+07	1.47526e+06	1.69328e+07	8.54072e+06	4.77421e+07	3.88313e+07	2.56316e+06	2.7091e+07	4.57081e+06	16155.9	714587	2.13911e+07	6.05984e+06	2.86684e+07	5.11288e+06	769773	1.79231e+07	1.70455e+07	1.63019e+07
1413	168.344	186.221	1.47648e+06	1.23446e+06	5.26541e+06	1.76351e+06	2.35785e+06	2.33498e+06	1.13343e+07	3.65932e+06	3.63023e+06	1.60486e+06	3.93513e+06	1.68681e+06	1.50186e+06	1.48109e+06	1.32611e+06	2.89219e+06	1.33025e+06	1.09067e+08	4.24677e+06	2.37001e+06	8.72e+06	9.10584e+06	8.59571e+06
1414	123.788	731.674	0	0	0	0	0	0	0	0	0	0	1.95701e+06	0	0	0	1.80606e+06	822903	2.63607e+06	2.63978e+06	0	0	284902	246635	258087
1415	200.288	351.142	660822	4.70587e+06	1.05083e+06	934803	951940	448168	1.35804e+06	628315	3.05645e+06	929155	441781	0	0	0	0	0	0	82350.5	0	0	626874	519054	541162
1416	390.145	292.101	1.42554e+06	501253	992658	8.78798e+06	1.07914e+06	1.04439e+06	2.95971e+06	763875	718991	3.04696e+06	1.61496e+06	540698	75417.2	219826	348521	511429	294927	62466.3	1.83692e+06	40444.9	1.32445e+06	1.41088e+06	1.40594e+06
1417	383.786	548.284	26728.7	0	95826	0	5.50836e+06	0	0	169632	4.4251e+06	1.05389e+07	0	343769	0	0	0	321928	84156.9	411631	92164.9	0	1.38669e+06	1.19743e+06	1.36188e+06
1418	310.079	493.238	3.15148e+06	0	0	0	0	0	83506.2	0	0	0	0	0	0	0	0	0	0	0	0	0	136763	174628	159259
1419	211.892	350.215	0	0	0	0	0	0	0	0	0	0	309087	453920	179242	536071	314526	201804	212450	260855	894444	189684	100500	73128.3	147681
1420	350.756	244.153	0	0	0	0	11744.2	15795.1	0	0	0	0	4.96968e+06	741296	2.72572e+06	1.03009e+06	5.80567e+06	1.95196e+06	1.65703e+06	994412	3.48076e+06	3.35394e+06	752341	588829	623214
1421	231.292	534.315	801295	1.1741e+06	1.29172e+06	1.4817e+06	763395	1.11526e+06	1.15407e+06	793300	1.25875e+06	659694	216382	266602	321178	1.62026e+06	444300	559397	296525	278677	940715	214954	684864	654658	723906
1422	149.678	228.085	2.24974e+07	3.17954e+06	1.76846e+07	2.65667e+06	5.55473e+06	2.73484e+06	4.21917e+06	1.91125e+06	1.14585e+07	7.02434e+06	1.20918e+06	469319	2.66326e+06	2.08249e+06	829740	3.68573e+06	1.74689e+06	4.25863e+06	2.18112e+06	506890	3.94232e+06	3.62315e+06	4.16535e+06
1423	15.6143	212.163	1.20594e+06	1.73841e+06	1.52586e+06	3.36566e+06	1.09923e+06	2.03203e+06	2.96797e+06	1.22289e+06	1.82908e+06	1.60381e+06	1.43647e+06	3.26244e+06	3.45696e+06	3.46121e+06	2.1955e+06	3.50794e+06	1.95788e+06	1.41757e+06	2.45814e+06	2.30275e+06	1.75852e+06	1.01051e+06	1.47217e+06
1424	102.912	317.194	0	257558	160010	0	270178	203515	132841	477256	668745	0	4.12703e+06	1.2162e+07	8.24742e+06	9.88034e+06	4.86489e+06	2.18413e+06	6.49083e+06	3.38746e+06	1.05334e+07	6.58542e+06	4.51022e+06	4.55157e+06	4.69275e+06
1425	295.036	209.079	3.56668e+07	3.65562e+06	1.80527e+07	6.6641e+06	1.0531e+07	1.74593e+07	1.37037e+07	1.08773e+07	7.00497e+06	1.29848e+07	6.49853e+06	1.41512e+07	9.29582e+06	8.95149e+06	2.36417e+06	3.01624e+06	6.23523e+06	3.14573e+06	1.09212e+07	7.74245e+06	7.56825e+06	8.33605e+06	8.10277e+06
1426	101.459	388.239	0	3.3684e+06	0	0	0	0	0	0	0	0	1.24192e+07	1.39978e+07	1.29591e+07	7.83248e+06	1.23495e+07	1.63826e+07	9.45175e+06	1.99071e+07	1.94961e+07	7.88499e+06	9.01453e+06	8.47325e+06	8.51987e+06
1427	401.258	272.111	281926	1.52267e+06	3.58912e+06	74640.2	1.10332e+06	1.17133e+06	437768	1.29535e+06	5.90955e+06	2.85332e+06	21013.5	67591.8	0	0	112642	1.24827e+06	11685.2	42984.5	1.67657e+06	149274	1.35319e+06	923741	174028
1428	231.386	469.129	58662.4	350937	45518.8	514245	268035	0	300756	187718	175835	0	0	0	0	0	0	0	0	0	0	0	37870	102233	118105
1429	324.275	539.098	0	273551	450958	756507	97861.3	0	0	836730	0	0	547859	581372	1.04122e+06	245301	100537	328059	383828	88386.6	798326	2.33038e+06	287859	154306	151563
1430	281.912	760.297	9.95325e+06	5.6924e+06	1.0895e+07	6.14281e+06	5.2375e+06	1.42307e+07	1.03837e+07	1.7516e+07	2.41582e+06	1.56735e+06	1.76095e+06	455202	1.10118e+06	3.03306e+06	2.12096e+06	2.89593e+06	937124	1.67056e+06	3.99157e+06	1.87554e+06	6.58665e+06	6.89614e+06	6.02116e+06
1431	273.641	250.127	2.22372e+06	455282	2.81916e+06	983958	575438	1.82562e+06	1.02204e+06	1.00914e+06	755171	192319	226198	29274.8	0	34784.1	0	395976	90822.6	176885	1.08589e+06	0	846583	975677	867334
1432	385.841	525.14	2.86124e+06	9.47665e+06	2.28817e+07	1.52592e+07	1.03972e+07	4.29599e+06	986054	1.35996e+07	6.98317e+06	3.0683e+06	1.07193e+07	2.14699e+07	1.79835e+07	5.57143e+06	2.5368e+06	2.86652e+07	6.12555e+06	5.51773e+06	1.68644e+07	2.78535e+07	1.57928e+07	1.69382e+07	1.53472e+07
1433	302.009	547.293	399805	0	30725.1	22152.4	0	0	0	0	0	0	315582	733345	171247	239640	50250	38862	103400	57973.7	407104	316538	45251.7	90694	35814.9
1434	356.447	344.132	354654	138011	103925	150939	142427	252076	230467	15955.1	473481	929333	10310.5	0	8053.33	0	40832	186223	19082.9	8800.54	152363	18061.4	272188	287705	286521
1435	309.614	330.201	136300	0	0	220924	0	0	0	0	77260.5	265655	1.00999e+06	714626	618324	845850	488865	3.38588e+06	462162	329776	4.61369e+06	848533	746711	708870	580908
1436	432.259	274.174	3.98162e+06	0	10651.2	0	450098	40501.6	0	52652.5	253945	1.44085e+06	1.26752e+06	1.21382e+06	188063	2.50133e+07	204830	1.46054e+06	184857	661503	0	2.77001e+06	1.53746e+06	1.49852e+06	1.36036e+06
1437	164.597	506.315	2.01832e+06	1.08424e+06	953561	308963	890990	1.65491e+06	1.07539e+06	1.31015e+06	0	791687	1.98421e+06	9.21897e+06	3.79534e+06	5.27839e+06	2.40169e+06	1.24659e+06	3.26649e+06	1.72618e+06	7.05176e+06	3.80693e+06	2.97425e+06	2.77726e+06	2.28219e+06
1438	34.7186	291.193	988750	668836	654167	493119	894173	747667	770479	500065	1.92083e+07	1.64092e+07	1.24815e+07	1.16511e+07	1.05068e+07	1.13696e+07	1.60857e+07	1.65109e+07	9.68489e+06	1.67525e+07	1.11358e+07	1.08572e+07	8.19156e+06	8.31702e+06	8.9318e+06
1439	349.53	196.082	1.70553e+06	1.84981e+06	7.7679e+06	441949	590756	1.94792e+06	1.03978e+06	2.955e+06	1.31759e+06	548508	3.06134e+06	4.63596e+06	2.27888e+06	3.48515e+06	7.52432e+06	2.47911e+06	2.49472e+06	1.75273e+06	2.93462e+06	878674	2.73796e+06	2.471e+06	2.61662e+06
1440	212.228	264.143	113816	0	303204	5.16207e+06	2.32869e+06	743521	1.24176e+06	81797.2	1.75295e+06	90272.2	1.71444e+06	798815	1.55273e+06	930567	376663	4.0473e+06	676145	1.82241e+06	2.64124e+06	554231	835995	548374	609499
1441	438.885	364.119	132266	624074	1.97648e+06	1.84532e+06	2.5862e+06	99578.2	1.02013e+06	1.38197e+06	914492	641664	231176	17073.4	234719	2.46244e+06	194927	770459	266468	56650.3	2.32361e+06	1.57521e+06	3.57328e+06	3.61645e+06	3.64274e+06
1442	183.446	250.103	1.1533e+08	4.08767e+07	1.37426e+08	1.38942e+08	2.01652e+08	9.56322e+07	1.13614e+08	2.05301e+08	1.53986e+08	2.14731e+08	2.70331e+07	1.21534e+08	5.30859e+07	2.50869e+07	2.40248e+07	1.1073e+08	6.5359e+07	1.47952e+08	8.92911e+07	9.64373e+07	1.42657e+08	1.3215e+08	1.30327e+08
1443	162.109	373.182	80345.7	0	0	0	0	0	0	249631	0	0	865978	3.41376e+06	2.32756e+06	2.56533e+06	1.33451e+06	282067	1.50966e+06	506973	2.35775e+06	2.16241e+06	96150.8	155571	0
1444	130.803	284.33	4.18261e+07	4.70165e+06	1.72054e+07	1.0167e+07	3.7846e+07	1.94714e+07	8.79759e+07	1.58999e+07	4.96833e+07	2.91792e+07	7.25195e+07	1.36596e+06	1.03226e+07	7.23909e+07	1.16449e+08	7.03204e+07	9.55768e+07	5.85717e+07	1.79988e+07	1.9972e+07	2.50768e+07	2.42204e+07	2.24026e+07
1445	274.783	436.163	201470	0	37214.9	0	43147.3	4.50207e+06	4.64454e+06	206725	0	0	125617	0	0	186574	0	47968.8	51722.3	168732	42619.5	0	1.44958e+06	796384	2.1926e+06
1446	417.538	333.212	423568	0	291306	250489	4.10153e+06	62375.8	0	32785.4	5.11543e+06	1.50697e+07	55461	7.76521e+06	5568.97	0	0	3.3213e+06	21757.8	1.093e+06	234653	18251.9	2.26897e+06	2.39151e+06	2.22036e+06
1447	398.386	400.144	198725	342325	3.90161e+06	295427	225660	146821	114258	240614	987522	409878	21424.5	98574.4	32899.7	0	36347.3	290247	7143.84	27499.9	97317.9	16249.2	431892	400979	364351
1448	284.404	578.335	8.99659e+06	4.35544e+06	3.85394e+06	3.38328e+06	3.05503e+06	6.27528e+06	2.3799e+06	7.04094e+06	1.31287e+06	399483	3.174e+06	2.5485e+06	2.02524e+06	1.94732e+06	1.20688e+06	773989	2.58403e+06	1.54782e+06	266278	1.75534e+06	3.19041e+06	3.41396e+06	2.84658e+06
1449	309.598	373.279	331440	0	17442.8	715307	732057	0	0	0	1.19461e+06	2.17287e+06	248885	163541	0	0	0	3.98643e+06	0	287564	71174	0	498042	506078	378219
1450	267.12	415.23	0	33048.6	255694	94985.1	40649.3	125220	70697.5	42238.8	512799	0	2.67046e+07	3.66892e+07	1.93619e+07	1.5732e+07	1.44947e+07	2.74142e+07	1.24159e+07	3.91606e+07	4.55441e+07	7.83207e+06	1.08704e+07	1.16863e+07	9.58887e+06
1451	381.211	450.184	89500.2	493055	418121	238465	268349	392184	201714	63238.3	895497	239091	1.22378e+06	3.59218e+06	1.6968e+06	498608	662556	4.40447e+06	395037	1.87751e+06	2.26511e+06	1.1621e+06	1.17276e+06	1.29214e+06	1.08962e+06
1452	55.5136	156.101	1.46068e+06	492866	667272	562188	709468	617154	539503	582407	642426	711302	5.27749e+06	4.07168e+06	4.29373e+06	9.40124e+06	5.45672e+06	6.4721e+06	2.54234e+06	3.4695e+06	6.2612e+06	6.35051e+06	2.41478e+06	2.17243e+06	2.64669e+06
1453	198.726	479.173	0	0	0	0	0	0	0	0	0	0	2.4556e+06	4.38282e+06	3.31302e+06	4.71235e+06	6.81047e+06	5.80658e+06	4.97453e+06	4.39819e+06	3.84149e+06	4.35506e+06	1.46654e+06	0	1.5798e+06
1454	422.078	205.063	515932	133588	359500	298422	1.26265e+06	179687	279849	68648.3	1.40014e+06	7.56141e+06	32908.6	7.19813e+06	136537	49367.5	23388.2	232697	238498	182805	85302.2	118034	1.16195e+06	1.13988e+06	1.12286e+06
1455	231.386	464.174	3.2658e+06	4.97213e+06	4.15043e+06	1.09535e+07	5.18468e+06	3.48958e+06	8.31688e+06	2.23126e+06	5.01843e+06	3.66288e+06	0	0	0	0	0	0	0	0	24951.4	0	2.88853e+06	2.83346e+06	2.50477e+06
1456	215.625	682.425	0	0	52133.4	0	52323.9	0	0	0	0	0	411781	999893	347822	310135	133663	234083	301683	145365	490364	458437	120043	176415	294796
1457	281.629	358.205	3.4834e+07	2.00271e+07	1.18641e+07	1.0987e+07	5.59902e+06	2.44177e+07	5.58278e+06	1.97673e+07	2.88605e+06	2.16429e+06	1.70196e+07	2.04233e+07	1.98531e+07	1.27739e+07	8.10828e+06	3.18819e+06	1.93238e+07	9.76506e+06	1.38449e+07	1.39273e+07	7.64641e+06	7.77145e+06	8.48757e+06
1458	237.638	188.127	3.75245e+06	2.45325e+06	2.00557e+06	2.50546e+06	1.64947e+06	1.8623e+06	573959	1.54122e+06	3.73917e+06	2.35264e+06	2.75555e+06	2.68645e+06	1.78476e+06	1.70411e+06	1.90174e+06	2.59294e+06	2.633e+06	2.09452e+06	3.35324e+06	1.80115e+06	2.18606e+06	2.17793e+06	2.28533e+06
1459	94.6398	525.285	7.53511e+06	3.39588e+06	3.79719e+06	2.3013e+06	4.61424e+06	7.07117e+06	4.42438e+06	8.03954e+06	4.70004e+06	1.44646e+06	608207	5.56005e+06	2.42546e+06	3.44362e+06	895890	268573	1.23341e+06	548601	4.17485e+06	2.18941e+06	3.91417e+06	3.88818e+06	4.0532e+06
1460	439.528	292.149	275665	84177.8	197571	172306	118653	145126	314807	90468.3	383162	355528	261065	599788	293986	0	164268	3.66993e+06	22535	155961	3.92538e+06	133680	547422	446472	482825
1461	111.884	608.383	6.20221e+08	4.87578e+08	4.09549e+08	3.76446e+08	4.68754e+08	5.58555e+08	5.1496e+08	8.38978e+08	3.98259e+08	3.24229e+08	1.48738e+08	2.99342e+08	2.30032e+08	2.45554e+08	1.09949e+08	8.49772e+07	1.54502e+08	9.32221e+07	2.99522e+08	1.77984e+08	3.53394e+08	3.48428e+08	4.10085e+08
1462	310.362	470.201	285040	536899	187664	118009	0	303234	397203	0	0	162463	299116	259330	27624.9	0	0	244998	18514.8	269203	74154.9	0	50009.2	99129.2	126598
1463	30.376	706.616	1.13193e+06	2.47757e+06	1.35192e+06	1.08419e+06	562549	751451	1.25034e+06	1.79695e+06	713977	1.21278e+06	194948	101723	49525.3	265022	385927	305210	176477	280305	251354	163050	554897	645560	488278
1464	209.286	423.198	934362	0	1.43111e+06	107399	88066.5	1.26993e+06	875692	291839	0	974389	55224.2	47160.3	0	62263.1	49187.6	61585.8	0	45024	0	52509	416350	414785	451487
1465	101.785	213.111	404940	682031	2.08599e+06	953125	761012	620396	1.29971e+06	884735	2.40975e+06	2.31655e+06	5.40536e+06	6.38612e+06	2.89157e+06	2.98798e+06	3.57967e+06	1.59386e+07	2.63967e+06	5.6815e+06	5.79841e+06	2.45291e+06	2.72947e+06	1.83608e+06	2.46276e+06
1466	202.846	325.105	1.17909e+07	8.80595e+06	1.31529e+07	5.24566e+06	7.29692e+06	1.01951e+07	1.12746e+07	5.93587e+06	3.89614e+06	7.2599e+06	114535	2.16018e+06	272945	117459	73577.1	133719	30789.1	143004	231539	86671.6	5.31603e+06	5.26584e+06	4.88403e+06
1467	163.982	279.085	5.08051e+06	2.63063e+06	4.66275e+06	1.05164e+06	2.05479e+06	5.45584e+06	3.16826e+06	3.18977e+06	1.3774e+06	476373	448796	53844	0	0	37522.8	89818.6	0	0	0	38206.6	1.24336e+06	1.23983e+06	1.34937e+06
1468	245.57	483.145	67982	252780	139644	155139	210326	147739	287113	147591	156871	103104	0	0	0	0	0	0	0	0	0	0	120786	134082	141339
1469	355.732	274.138	2.29365e+06	66166.3	168195	1.36608e+06	277211	430595	667037	109479	3.41197e+06	622156	1.1886e+06	978700	1.06055e+06	1.49837e+06	571592	1.25834e+07	485094	248756	4.58744e+06	564139	1.44343e+06	1.4787e+06	888193
1470	317.592	331.195	2.95592e+06	0	917757	886523	1.45808e+06	157587	57822.9	47676.1	1.33386e+06	2.14712e+06	111491	348853	0	0	29202.3	933661	0	294181	501493	0	753038	1.12685e+06	640825
1471	238.097	190.106	3.58244e+06	81929.7	127077	580547	1.2124e+07	884148	1.52584e+06	1.42165e+06	2.73266e+07	3.83569e+07	120977	5.9348e+06	399368	20547.6	163419	1.31117e+07	1.31961e+06	8.55296e+06	638387	427768	4.81876e+06	4.77955e+06	4.67197e+06
1472	204.675	260.184	0	0	0	0	0	0	0	0	0	0	570565	54102.9	170493	607204	1.38898e+06	526030	792248	1.24075e+06	588371	428945	55986.5	120983	102095
1473	296.098	310.148	5.83888e+06	926786	2.46892e+06	1.96428e+06	1.72609e+06	5.97394e+06	4.60377e+06	6.22004e+06	2.03836e+07	4.04449e+06	3.54816e+06	1.25561e+06	2.60877e+06	2.74073e+06	7.87527e+06	2.77197e+07	8.12727e+06	3.15242e+06	5.49476e+07	9.27239e+06	9.564e+06	7.39175e+06	5.52349e+06
1474	428.598	338.191	90457.6	18529.9	0	0	0	0	0	0	15279.2	23823.4	29575.7	0	6178.3	1.74485e+06	87294.3	94305.3	35068	0	222511	154285	232041	173483	361074
1475	214.072	466.19	1.62606e+06	148567	5.10816e+06	1.18235e+06	716018	193530	1.48809e+06	1.8511e+06	945740	1.85271e+06	58529	1.75827e+06	140280	23357.5	848993	377214	444189	147919	237927	152444	1.02193e+06	845269	603275
1476	220.632	466.29	2.23618e+06	1.66575e+07	290574	547686	845487	2.162e+06	1.77663e+06	1.5324e+06	3.94241e+06	1.02039e+06	70672.6	3.40192e+06	394960	37862.8	0	243671	245520	522073	163162	59664.1	766021	687833	728226
1477	230.359	368.158	1.81464e+06	0	79541.1	435766	1.31112e+06	18977	242919	0	1.01218e+06	2.80048e+06	27155	584667	24826.9	10876.8	0	1.00128e+06	15884.8	505808	113842	13540.6	571764	499056	508597
1478	432.128	289.185	0	0	26925.1	57228.1	674156	0	0	0	251037	809848	13298.8	75439	0	0	0	332026	0	206254	0	0	173879	169675	172835
1479	75.8279	578.334	1.05312e+06	2.12659e+06	3.47766e+06	2.41574e+06	2.36508e+06	1.25564e+06	4.05277e+06	3.68892e+06	1.13847e+06	668590	1.37768e+06	4.31255e+06	2.43892e+06	2.19529e+06	1.44604e+06	1.64819e+06	1.0724e+06	1.02641e+06	5.38758e+06	2.65103e+06	2.62104e+06	2.70322e+06	2.66085e+06
1480	485.297	434.222	0	0	15439.4	19487.2	31227.3	5657.29	6506.27	6916.19	1.02331e+06	1.94261e+06	0	184242	0	0	0	342382	0	25711.6	0	0	130902	183193	150138
1481	153.221	449.303	1.14873e+07	1.60926e+06	9.78116e+06	267328	1.50561e+06	2.29877e+06	407772	2.15065e+06	1.27678e+06	4.66061e+06	278007	95773.9	71276.8	42816.1	0	185476	44677.5	266485	222151	0	1.77122e+06	1.90593e+06	1.70524e+06
1482	206.83	283.152	102039	66417.1	0	0	91600	0	87638.1	509739	0	0	4.13256e+06	2.60452e+06	2.17411e+06	2.05002e+06	3.12103e+06	3.03434e+06	1.63419e+06	2.30633e+06	4.22656e+06	1.10731e+06	1.01472e+06	632965	1.03621e+06
1483	397.504	539.279	670624	8858.92	229248	183709	161821	80234	33265.6	114003	1.75827e+06	3.57295e+06	17846.2	230008	9876.56	0	0	2.60267e+06	48213.7	778549	0	0	485944	441110	439566
1484	112.229	373.22	1.84597e+06	0	2.33466e+06	1.83126e+06	202788	825366	1.20316e+06	0	1.09323e+06	2.23223e+06	2.67686e+07	2.85482e+07	2.24952e+07	9.42859e+06	1.631e+07	2.94127e+07	1.80348e+07	3.53531e+07	3.49194e+07	1.64886e+07	1.37231e+07	1.35191e+07	1.4363e+07
1485	383.848	331.232	320727	0	110768	331056	461401	0	0	0	2.27458e+06	576241	9543.91	796471	0	0	0	352493	8255.79	270105	0	0	305718	212758	243993
1486	51.2127	363.141	7.24882e+06	6.16301e+06	7.14715e+06	2.01157e+07	7.5391e+06	4.68768e+06	1.60278e+07	4.33923e+06	5.70417e+06	5.90471e+06	790313	810647	859748	709509	1.23413e+06	557092	2.77261e+06	945122	1.05411e+06	2.80835e+06	3.14536e+06	3.41268e+06	4.26635e+06
1487	142.135	359.205	0	0	0	0	0	0	0	152954	0	72083.9	5.00116e+06	5.5188e+06	3.47376e+06	3.19294e+06	3.30105e+06	5.46432e+06	2.26968e+06	4.89528e+06	5.76644e+06	3.5161e+06	3.05096e+06	1.41339e+06	2.54248e+06
1488	154.039	184.063	1.22867e+08	1.11648e+08	1.14538e+08	1.06098e+08	1.19632e+08	9.2844e+08	7.68215e+07	1.0208e+08	8.54056e+07	6.48515e+07	5.15512e+06	3.78185e+06	3.42343e+06	1.62206e+07	4.72647e+06	3.66544e+06	1.36617e+07	4.21718e+06	3.9363e+06	4.96415e+06	1.11389e+08	1.09273e+08	1.0721e+08
1489	224.609	535.178	220625	426195	588759	199262	256841	346264	455569	1.20661e+06	0	0	0	0	0	40475.2	0	0	0	0	0	0	111086	104367	26562.2
1490	439.831	413.201	264430	0	29327.3	0	179832	9059.17	7476.33	0	78060.5	1.28768e+06	0	18076.1	0	0	0	373883	0	195498	0	0	142627	139751	81875.9
1491	55.8843	662.427	0	0	147414	0	294659	128986	0	435434	0	0	837168	2.15563e+06	1.30603e+06	1.49039e+06	310993	336000	927881	751927	1.81207e+06	1.17065e+06	222787	404855	651381
1492	320.372	201.086	868481	114926	2.08044e+06	820755	647788	206379	1.00801e+06	1.01318e+06	1.28952e+06	596224	427143	600482	297696	544452	758271	821077	561798	670502	454787	300604	1.07522e+06	1.05392e+06	605101
1493	276.497	563.21	4.01069e+06	4.44995e+06	3.3024e+06	2.22555e+06	747541	7.21359e+06	2.77315e+06	2.65485e+06	430093	326593	70618.8	0	81624.8	0	0	0	0	0	0	0	1.01526e+06	1.2023e+06	1.18989e+06
1494	456.521	266.122	4.67408e+06	989251	4.1482e+06	8.0913e+06	1.89391e+06	1.80001e+07	8.92467e+06	1.51565e+07	3.80517e+06	1.46214e+07	2.49433e+06	2.29676e+06	1.04341e+06	890987	1.87585e+06	3.71263e+07	880212	1.57304e+06	5.14315e+07	5.37074e+06	1.53911e+07	1.57838e+07	1.5757e+07
1495	107.833	418.263	6.94206e+07	6.55087e+07	2.21292e+07	2.9298e+07	3.6701e+07	4.45576e+07	1.84885e+07	5.71096e+07	1.11047e+07	4.12633e+07	2.31618e+07	6.91589e+07	4.08443e+07	5.84492e+07	1.81158e+07	1.57916e+07	2.73897e+07	1.44702e+07	6.96534e+07	4.67241e+07	2.18139e+07	3.34954e+07	3.13282e+07
1496	523.727	392.201	0	0	0	0	0	0	0	0	0	0	200015	62008.7	0	400128	0	162078	0	0	29257.7	346202	234048	323155	253381
1497	322.941	347.19	1.80919e+06	0	154335	153598	1.60035e+06	0	68131.7	0	557591	1.1314e+06	271152	735291	280513	222580	36798.6	619719	286808	841500	387341	155146	293637	768103	628107
1498	245.208	196.082	5.33059e+07	5.52031e+06	2.89106e+07	1.18562e+07	3.46366e+06	1.34221e+07	1.0405e+07	4.37485e+06	5.68071e+06	8.15412e+06	4.07286e+06	3.06339e+06	4.93115e+06	4.02072e+06	6.67544e+06	9.33651e+06	3.47706e+06	2.98023e+06	1.01856e+07	9.25146e+06	1.17019e+07	1.07254e+07	1.09286e+07
1499	208.695	612.297	0	0	0	0	0	0	0	0	0	0	1.00067e+07	9.7591e+06	1.04483e+07	1.72541e+07	1.24341e+07	7.39563e+06	1.23429e+07	1.08441e+07	1.64461e+07	7.29579e+06	4.94111e+06	5.53922e+06	5.4228e+06
1500	214.986	597.322	0	0	0	0	0	0	0	0	0	0	1.29832e+06	643688	1.56957e+06	2.10043e+06	3.10062e+06	1.09464e+06	1.85729e+06	1.32054e+06	504678	246118	96107	338938	226592
1501	424.32	427.205	0	167161	146438	65324.8	48796.7	8123.72	77315.3	0	0	785622	0	0	0	0	0	0	0	0	0	0	86608.3	117518	114168
1502	197.827	219.1	1.01743e+08	6.65879e+07	1.18532e+08	4.10572e+07	6.44513e+07	9.56068e+07	9.4108e+07	6.99271e+07	5.47789e+07	5.51143e+07	5.8188e+07	5.9262e+07	3.9432e+07	3.23536e+07	5.78973e+07	5.18226e+07	4.1778e+07	4.14624e+07	6.78835e+07	3.75682e+07	8.88933e+07	7.40598e+07	6.44829e+07
1503	62.531	527.174	0	0	0	0	0	0	0	0	0	0	1.34474e+07	1.55437e+06	1.53447e+07	1.39312e+07	2.45313e+06	2.92347e+06	402840	0	850088	1.81312e+07	2.7702e+06	2.91759e+06	2.81068e+06
1504	298.201	459.132	413730	1.04772e+06	479325	133847	821985	1.18702e+06	1.18509e+06	487364	0	72330.2	0	0	0	0	0	0	0	0	25346.7	0	383721	232376	678936
1505	117.567	324.163	8.36003e+07	3.25014e+07	8.82247e+07	3.92884e+07	9.62959e+06	2.37684e+07	1.23389e+08	2.85535e+07	7.47054e+07	8.31785e+07	1.36464e+07	1.28619e+07	7.09715e+06	4.46354e+06	5.74241e+07	4.96444e+07	5.05968e+07	1.1791e+07	3.30102e+08	2.69981e+07	6.16313e+07	6.27361e+07	6.39666e+07
1506	356.656	258.143	409138	108117	869451	391083	1.39535e+06	492102	245698	460016	2.36019e+06	467135	277220	414935	137398	1.38807e+06	75571.8	425453	162540	898300	619328	158694	641066	591064	609433
1507	63.4572	187.143	523307	1.25494e+06	593190	5.99106e+08	364725	2.81216e+07	4.38043e+08	239570	71289.1	295294	3.20334e+07	598371	662502	1.03458e+06	536864	857122	668553	913555	1.57856e+06	800521	4.80276e+07	4.8217e+07	4.93104e+07
1508	78.9409	236.138	0	194198	0	4.10182e+06	0	203576	160552	0	0	0	2.21403e+06	1.51232e+06	3.06178e+06	3.66858e+06	6.72853e+06	5.35359e+06	1.01234e+06	1.14645e+06	9.13395e+06	1.62447e+06	1.5172e+06	1.42597e+06	1.55629e+06
1509	409.248	290.169	77547.4	155769	222379	191123	700142	120599	109062	80293.6	1.04049e+06	2.88465e+06	121014	585007	0	287630	0	754904	67908.8	435782	0	346905	783631	701196	609020
1510	400.218	310.148	232892	30533	426768	1.2686e+06	252135	469077	161724	158398	849092	159455	298026	66321.9	109254	284790	395771	1.21453e+06	117143	100746	2.59692e+06	230748	514649	351180	492712
1511	169.95	479.282	0	0	0	0	0	0	0	0	0	0	3.45782e+06	8.82433e+06	7.19698e+06	8.13095e+06	3.28945e+06	1.2148e+06	5.05112e+06	1.01286e+06	1.00513e+07	5.56379e+06	1.28029e+06	1.77408e+06	1.84785e+06
1512	399.313	264.117	1.3419e+07	5.52974e+06	1.09361e+07	4.82775e+06	9.58923e+06	3.61767e+06	5.43652e+06	6.71631e+06	1.40666e+07	8.49863e+06	2.37099e+06	6.34752e+06	1.38785e+06	254062	655305	3.36092e+06	1.41442e+06	5.6426e+06	4.40015e+06	4.01747e+06	7.0996e+06	6.23956e+06	6.6743e+06
1513	240.439	188.164	0	0	0	0	0	0	670389	0	0	0	1.25289e+06	568135	2.43018e+06	1.53049e+06	2.77841e+06	5.53407e+06	5.58556e+06	1.14729e+06	5.17648e+06	1.5375e+06	1.49406e+06	1.40057e+06	1.36313e+06
1514	98.9618	404.191	172069	74914	1.23373e+06	154362	407609	228873	253857	124670	258381	849456	3.62296e+06	3.17957e+06	3.46151e+06	8.81767e+06	2.84038e+06	3.54518e+06	3.26227e+06	4.03428e+06	3.87185e+06	2.11373e+06	1.86501e+06	1.98263e+06	1.99752e+06
1515	400.32	317.217	67151.8	40887.2	176309	177339	438878	148435	0	0	991577	1.37811e+06	147490	453361	0	55024.1	0	1.08412e+06	0	207371	45773.6	35596.3	172179	119631	129189
1516	418.529	401.149	204898	130116	126609	114822	517902	26443	10518.6	142773	172603	1.34089e+06	0	0	0	0	5164.98	472043	0	0	0	0	50809.8	198628	63494.1
1517	214.156	341.193	0	95579.8	0	0	0	59522.6	0	70722	0	0	1.69344e+06	3.45611e+06	2.10501e+06	2.26384e+06	1.02638e+06	1.02684e+06	1.52642e+06	972236	2.75638e+06	1.48559e+06	1.10021e+06	934954	982572
1518	98.9613	174.111	1.76004e+08	1.25625e+07	9.34101e+07	6.33717e+07	5.17625e+07	9.91669e+06	9.75568e+07	7.45905e+06	2.0965e+07	1.85749e+07	1.76344e+07	7.16919e+06	1.54991e+07	6.99037e+06	1.12269e+07	3.42495e+07	3.9911e+07	1.15319e+07	1.35415e+08	2.21845e+07	4.75818e+07	4.49453e+07	4.27675e+07
1519	250.349	429.247	0	0	0	0	0	0	19554.8	0	0	0	1.8082e+06	3.21887e+06	1.71484e+06	975368	1.03145e+06	2.27099e+06	1.05978e+06	2.38309e+06	3.07452e+06	684532	708580	611643	603360
1520	169.265	702.541	5.32183e+07	1.43827e+08	1.40204e+08	1.07127e+08	1.95428e+08	2.1588e+07	1.29776e+08	1.2494e+08	1.61094e+08	1.3543e+08	9.02985e+07	1.34443e+08	8.36653e+07	3.10031e+07	3.22556e+07	1.38689e+08	6.82074e+07	1.09339e+08	8.53895e+07	1.00593e+08	1.36647e+08	1.29955e+08	1.23133e+08
1521	50.9585	864.617	2.54332e+06	2.14226e+06	2.84105e+06	2.66205e+06	1.97748e+06	3.15613e+06	2.62992e+06	3.51762e+06	3.8884e+06	7.13252e+06	1.90479e+06	148393	171487	351017	2.23739e+06	1.32593e+06	2.21437e+06	2.98383e+06	182540	398690	2.02099e+06	1.70644e+06	2.05977e+06
1522	27.1058	313.105	0	0	7736.84	0	16195.8	0	12463.1	0	7770.75	0	432762	1.67427e+06	352066	163886	1.20718e+06	679470	777375	2.01033e+06	514435	368478	299355	263697	270126
1523	90.5701	401.252	150884	0	105973	257569	92102.2	0	0	0	343375	0	2.10812e+06	2.11387e+06	2.4363e+06	2.09553e+06	1.98993e+06	2.98111e+06	1.95095e+06	3.47737e+06	4.8453e+06	1.37867e+06	1.05071e+06	988764	350689
1524	410.579	410.174	0	0	0	81770.9	44310.9	15848.9	0	18624.2	630390	1.376e+06	0	102290	0	16676.8	0	300354	0	0	14274.8	0	147017	145526	210467
1525	35.1059	335.22	0	127844	0	0	0	0	0	0	0	0	3.91932e+06	6.37849e+06	4.63721e+06	5.26578e+06	6.29485e+06	6.04617e+06	3.84467e+06	4.48863e+06	5.608e+06	4.54904e+06	2.48556e+06	2.99123e+06	2.68541e+06
1526	204.718	540.205	1.45475e+06	1.35431e+06	2.55537e+06	2.50996e+06	282690	924970	1.46547e+06	879993	1.35967e+06	1.74579e+06	0	64067.7	76582.5	0	80413	0	0	0	100733	0	552948	740669	499109
1527	256.118	241.117	1.07036e+06	0	81702.9	1.05146e+06	1.02286e+06	369145	149055	0	50373.5	2.35385e+06	445441	7.6915e+06	503482	29628	0	1.69651e+06	1.46827e+06	3.62857e+06	2.40521e+06	73963.7	725480	720685	486546
1528	372.346	422.17	1.02024e+06	915346	702655	216993	1.06262e+06	395136	502251	938953	182788	0	0	0	0	0	34662.2	0	102365	0	0	0	305900	113982	122485
1529	147.123	297.147	283743	266909	955502	644474	341141	579036	723252	167155	389727	193692	6.05708e+06	3.3104e+06	1.91153e+07	6.87703e+07	1.66302e+07	7.90169e+06	1.59645e+07	3.82619e+06	2.3548e+07	1.82839e+07	8.74625e+06	8.46689e+06	8.19577e+06
1530	50.2108	892.65	3.37013e+06	3.48878e+06	4.21382e+06	3.76547e+06	2.7638e+06	3.60193e+06	1.61385e+06	1.68618e+06	4.99959e+06	3.81714e+06	779168	0	0	0	962037	504963	944339	1.42873e+06	0	51105.2	1.91164e+06	2.28846e+06	2.32972e+06
1531	91.5632	668.651	1.44272e+06	373999	1.26723e+06	1.08503e+06	691485	2.81183e+06	0	1.01329e+06	2.282e+06	1.19049e+06	502137	1.11911e+06	1.37717e+06	255587	69904.9	1.11518e+06	633866	1.13157e+06	733200	2.00346e+06	820928	1.20583e+06	937738
1532	393.526	414.186	17748.4	35369	74725.6	0	0	69198.9	30836.1	0	33580.8	0	248674	948691	347180	100367	166126	1.74112e+06	70730.4	591066	632209	213690	288148	303526	263644
1533	71.4841	439.23	149827	0	0	0	0	0	0	0	0	0	2.18959e+06	927275	898514	202274	669039	2.4149e+06	1.35054e+06	2.85657e+06	3.03072e+06	900637	201694	528803	0
1534	246.942	288.19	5.99508e+06	115530	7.16262e+06	2.09305e+07	9.44396e+06	801782	952009	1.5173e+06	9.89959e+06	5.61436e+06	1.27978e+06	1.87659e+06	1.30404e+06	3.35979e+06	527863	2.73046e+06	969680	548984	305101	1.9043e+06	4.86173e+06	4.6163e+06	3.70951e+06
1535	404.829	226.082	2.73711e+07	1.50186e+06	4.29465e+06	2.84031e+06	8.18862e+06	8.66405e+06	1.0513e+07	8.29328e+06	3.07161e+06	825152	4.28074e+06	6.12329e+06	9.18771e+06	4.67676e+06	3.36594e+06	6.86912e+06	8.24957e+06	1.19335e+07	7.669e+06	7.19006e+06	6.84643e+06	7.41741e+06	6.69969e+06
1536	357.796	565.152	219798	143352	411692	122152	121069	198479	211589	200551	263160	228385	0	0	0	0	0	0	0	0	22912.4	0	113689	139618	138910
1537	231.419	462.194	6.9569e+06	1.11076e+07	2.65569e+07	1.30808e+07	8.96325e+06	1.39797e+07	1.89686e+07	3.29818e+06	1.00402e+07	6.55825e+06	0	0	0	0	0	0	0	0	0	0	7.3393e+06	7.11511e+06	6.87827e+06
1538	175.512	418.169	2.51289e+06	2.90352e+06	3.46192e+06	4.12182e+06	3.54056e+06	3.50181e+06	3.23578e+06	1.93661e+06	890424	698951	653475	45710.4	34110.8	88608	178280	47648.5	117585	289788	544104	187836	1.47241e+06	1.55754e+06	1.36062e+06
1539	447.267	471.29	0	0	0	0	61189.5	0	0	0	84920.5	1.96052e+06	0	42896.4	0	0	0	923058	0	78136.6	0	0	126091	91928.8	79293.6
1540	231.178	288.215	185044	1.10835e+06	9.47079e+06	3.22973e+06	2.58965e+06	1.15025e+07	891857	694132	9.3498e+06	2.42339e+07	515882	3.9601e+07	3.77979e+06	459871	332286	2.746e+06	783088	2.21431e+06	685614	3.36821e+06	7.31494e+06	6.06855e+06	5.62861e+06
1541	311.49	404.191	459142	0	0	0	1.44281e+06	0	0	0	272456	7.5746e+06	0	39418.5	0	0	0	1.02631e+06	0	980123	50420.6	0	702725	645859	508319
1542	491.862	442.189	160799	81256	838774	277355	748477	129220	757748	482849	673414	449174	0	0	0	0	0	0	0	0	0	0	358676	359508	329777
1543	216.885	441.171	0	0	0	0	53347.5	0	0	0	0	0	520535	138913	414497	6.00091e+06	4.87116e+06	1.28501e+06	4.2784e+06	167027	895424	1.2005e+06	288236	354597	411882
1544	147.139	315.157	0	0	0	0	0	0	0	0	0	0	2.45044e+06	981471	7.93154e+06	2.69716e+07	6.3111e+06	3.0066e+06	5.98827e+06	1.42808e+06	8.38325e+06	6.6048e+06	3.07195e+06	3.21518e+06	3.46388e+06
1545	459.737	434.222	0	0	52817.3	67659.9	114637	8344.03	0	7188.44	983174	1.93028e+06	0	180525	0	0	0	427806	0	32051	0	0	259867	270853	343999
1546	446.304	310.174	222804	1.05262e+06	1.07801e+06	1.70637e+06	1.21595e+06	327031	628632	217210	6.03829e+06	5.45119e+06	396108	3.5067e+06	1.98289e+06	295687	321166	879100	305130	1.27984e+06	147137	486212	1.38968e+06	1.23338e+06	1.34801e+06
1547	451.957	310.127	40304.9	0	165330	33436.9	213578	678826	0	184474	776691	264313	82188.6	13962.9	24168.9	236893	299000	647924	88437.7	0	1.14441e+06	125716	2.07325e+06	1.80663e+06	1.55796e+06
1548	234	284.159	0	0	21028.8	0	0	70914.2	24163.2	0	0	0	1.36953e+06	176019	847700	2.04832e+06	303293	1.04208e+06	1.9189e+06	1.79268e+06	1.33368e+06	2.32612e+06	602915	790376	680894
1549	120.265	330.334	2.04364e+08	5.38267e+07	6.82568e+07	9.03214e+06	9.42387e+07	4.47666e+07	6.71632e+07	9.16714e+07	2.38411e+08	6.82222e+07	4.13865e+07	1.92523e+08	2.31109e+07	6.30359e+06	7.01239e+06	7.97318e+07	3.46143e+07	9.08824e+07	3.30675e+07	3.36216e+07	8.44664e+07	8.92809e+07	8.894e+07
1550	233.098	426.295	548193	250986	163791	97057.8	60284.1	1.64468e+06	671806	198471	925484	758586	104885	1.04652e+06	0	15599.7	0	261608	65578.8	164233	0	0	270323	316704	347941
1551	223.071	508.373	2.48538e+07	2.4969e+06	2.09892e+06	2.53924e+06	3.75551e+06	2.05609e+08	2.00401e+06	185476	3.72067e+06	1.61826e+07	0	640179	174929	0	191048	6.17825e+06	168869	1.45697e+06	853537	168524	1.55186e+07	1.44813e+07	1.34873e+07
1552	258.889	536.23	0	37180.8	45902.5	0	0	143686	0	13540.9	0	0	443540	340885	35953.1	259763	200981	713466	136802	312381	75195.7	318360	264832	167561	98745.9
1553	301.449	564.32	1.29519e+06	724327	594219	567212	662860	926595	809122	844277	0	0	4.49295e+06	1.1996e+07	4.68244e+06	4.59812e+06	1.76234e+06	3.3159e+06	4.00547e+06	2.28642e+06	6.75805e+06	6.0416e+06	3.12515e+06	3.02839e+06	2.49758e+06
1554	260.435	546.28	0	0	339027	1.66548e+06	819046	0	0	40834.1	0	329282	53786.1	168519	47970.6	60584.8	0	2.0936e+06	31775.4	49529.8	205368	24031.5	396555	618855	370767
1555	254.055	518.315	594426	95051.3	16284.7	67057.3	37118.2	43180.6	0	101892	688888	0	654821	0	26533.4	192168	251749	482880	477059	390751	29721.4	0	174335	119427	93915.8
1556	274.397	214.067	726869	1.28137e+06	1.19276e+06	820648	1.06522e+06	688905	1.18605e+06	7.57516e+06	459059	1.14111e+06	171594	0	383521	152771	1.0501e+06	289513	511653	144816	3.99952e+06	227076	1.4081e+06	822886	2.61757e+06
1557	250.101	302.206	1.29356e+07	580801	1.89584e+06	2.21969e+06	4.33478e+06	527601	1.48062e+06	445079	4.7124e+06	6.98954e+06	683993	1.18317e+06	965544	582195	620427	1.45193e+06	536709	1.90733e+06	1.92829e+06	693940	3.23691e+06	3.00524e+06	2.28651e+06
1558	391.781	204.116	505297	185595	261263	366435	141912	726257	401242	180977	139076	252286	81544.7	81913.6	464196	347479	138710	2.89079e+06	183947	323704	1.33127e+06	200027	215655	239184	216349
1559	356.637	321.113	293127	39350.5	556478	458650	97264	204993	481084	117550	101810	326939	0	0	11239.5	0	23260.7	15508.1	0	0	11351.7	10900	207278	152173	151894
1560	508.693	667.226	0	0	768325	0	267951	0	0	71769.5	463187	289763	0	910611	0	0	0	610064	0	0	72633.2	0	260500	207956	245699
1561	106.802	374.236	1.3144e+07	1.77624e+07	8.66988e+06	8.67619e+06	8.23202e+06	1.4086e+07	1.42151e+07	1.60034e+07	6.68076e+06	1.28008e+07	2.7331e+07	7.20563e+07	4.07949e+07	7.3191e+07	2.27069e+07	1.97347e+07	3.88552e+07	1.91825e+07	7.95008e+07	4.9183e+07	2.68333e+07	2.74069e+07	2.84524e+07
1562	413.908	566.29	121126	12337.7	145553	167526	1.16282e+06	0	43850.9	55671.2	584099	3.0397e+06	70615.8	99448.5	0	0	0	2.7347e+06	7835.3	560024	88683.3	0	481791	476133	486155
1563	248.154	352.185	2.79126e+06	11239.4	507821	322732	964627	320839	195434	46947.6	1.07078e+06	1.13079e+06	160849	395037	39973.8	441979	19834.2	370303	95567.2	321730	335329	33693.8	547788	704127	436149
1564	353.601	207.096	1.21006e+06	429407	875972	2.23057e+06	4.02206e+06	421070	3.17805e+06	1.13082e+06	8.51397e+06	1.95574e+07	297488	1.2763e+07	433109	184457	685374	9.84887e+06	715690	5.5142e+06	1.16083e+06	670987	4.10881e+06	4.03814e+06	4.00393e+06
1565	202.17	243.122	105747	0	0	1.14494e+06	631953	87620	135697	0	83998.8	2.09364e+06	896004	1.48462e+06	357719	363285	1.39846e+06	1.21091e+06	1.03847e+06	868141	1.93375e+06	469641	701152	800204	767170
1566	265.717	548.289	2.41807e+06	2.53438e+06	2.5549e+06	1.40487e+06	1.62496e+06	1.16548e+06	1.98475e+06	856380	621703	1.0714e+06	267176	27122.3	0	0	257680	1.17762e+06	306495	372366	169366	0	848604	737719	820306
1567	419.416	450.253	131395	0	173191	727968	1.62733e+06	0	41994.8	63837.8	994211	6.17049e+06	0	493022	0	0	0	1.38524e+06	0	134915	13993.5	0	476910	526172	544901
1568	90.9248	310.273	1.1232e+06	1.60314e+06	1.69575e+06	1.27855e+06	1.41783e+06	300558	3.34017e+06	317071	1.82053e+06	2.03517e+06	63278.8	168660	0	0	0	132998	0	0	650366	1.30973e+06	816522	706516	761538
1569	262.623	592.351	842609	478066	139338	135596	921991	304216	263366	838342	0	0	737411	0	0	13777	0	0	362590	425923	0	0	184003	445626	258670
1570	415.568	324.163	3.91274e+06	494147	1.28379e+06	1.12078e+06	619949	393030	1.54067e+06	824640	655358	1.56281e+06	723353	231769	578902	245682	136531	498093	84955.6	722661	3.06876e+06	1.87053e+06	666702	649101	725692
1571	263.878	522.281	0	1.03639e+06	9.6016e+06	2.76909e+06	3.73066e+06	0	36917	3.15805e+06	2.66205e+06	2.14638e+06	127089	2.47244e+06	23225.5	0	0	6.25678e+06	0	389861	2.19651e+06	0	2.84872e+06	2.55934e+06	2.52965e+06
1572	284.483	478.225	4.29048e+06	1.78484e+06	3.74336e+06	3.62062e+06	8.76167e+06	972237	5.65377e+06	967027	9.5376e+06	9.21466e+06	0	0	0	0	0	0	0	0	0	0	3.45499e+06	4.33433e+06	3.72672e+06
1573	152.819	431.292	1.38098e+07	2.38047e+06	1.1244e+07	318787	1.67717e+06	2.95639e+06	639011	2.67313e+06	8.84813e+06	6.10882e+06	373239	1.37141e+06	291602	129043	259899	314971	0	866021	870539	0	2.17234e+06	2.58455e+06	2.44671e+06
1574	231.597	364.188	901342	0	0	0	974236	0	0	0	1.60774e+06	186779	0	0	0	0	0	267315	0	273016	62423.6	0	186382	226963	148841
1575	314.961	230.043	1.16137e+06	1.95496e+06	790204	281893	2.00991e+06	2.14171e+06	1.95842e+06	3.15612e+06	1.56062e+06	1.10121e+06	793795	3.07997e+06	2.37436e+06	940552	2.82334e+06	1.17931e+06	2.77529e+06	1.4236e+06	2.42413e+06	2.61766e+06	1.73912e+06	868028	2.99174e+06
1576	269.918	427.206	111356	122120	1.77195e+06	2.29845e+06	2.75892e+06	0	248281	70484.8	5.80768e+06	1.3781e+07	36090.9	0	0	0	0	2.16744e+06	0	56028.8	356042	0	1.10836e+06	1.58959e+06	693172
1577	267.402	197.08	4.1776e+06	1.88178e+06	3.5977e+06	1.35826e+06	1.55896e+06	1.84746e+06	2.57627e+06	1.00669e+06	816308	2.42247e+06	313347	112188	62497.4	133855	60776.4	277542	142148	75661.1	103840	81958.6	1.49433e+06	1.37807e+06	1.1594e+06
1578	324.288	602.335	583525	0	0	0	0	0	0	0	0	0	600884	168760	709759	729897	157415	153243	711259	227892	707469	272399	170584	91034.4	168721
1579	447.012	434.185	72825	18322.4	293703	489436	314495	110119	109130	266955	126285	31822.1	327245	790022	474360	334596	639124	1.54263e+06	41924	360272	615484	662259	435187	452084	406785
1580	369.14	210.955	704520	1.89579e+06	687451	1.37339e+06	708970	1.10786e+06	1.18643e+06	1.00333e+06	321552	906852	1.55739e+06	2.38501e+06	1.78447e+06	1.76108e+06	1.39138e+06	834806	1.80795e+06	1.21987e+06	1.86896e+06	2.21491e+06	1.1139e+06	1.33468e+06	1.21054e+06
1581	217.376	361.271	167975	538184	622466	2.06994e+06	3.00899e+06	217391	5.81382e+06	2.35006e+06	6.20681e+06	9.3831e+06	30185.9	5.08685e+06	1.71525e+06	0	20799.8	3.10656e+06	1.90109e+06	3.00012e+06	502876	92893.7	2.4134e+06	2.7214e+06	2.24367e+06
1582	318.513	316.185	2.61407e+06	140532	321590	912980	3.01232e+06	222047	489873	177274	3.73628e+06	4.54924e+06	316131	1.04496e+06	0	63518.1	31521.9	2.9183e+06	216213	2.7144e+06	763728	92175.7	2.04089e+06	1.57522e+06	1.85061e+06
1583	247.758	242.122	2.09468e+07	4.70078e+06	1.632e+07	1.74149e+07	1.34701e+07	3.7364e+06	1.1092e+07	8.99099e+06	1.34582e+07	1.12182e+07	950576	1.06467e+06	1.79534e+06	930757	3.17434e+06	1.58834e+06	1.88445e+06	1.45868e+06	4.35189e+06	1.28328e+06	7.51824e+06	6.97868e+06	6.86363e+06
1584	391.962	203.112	468431	170546	180831	123703	747258	215909	195045	260932	1.34163e+06	3.39105e+06	1.12085e+06	2.73927e+06	7.95151e+06	6.46136e+06	864425	3.88232e+07	2.12147e+06	3.19744e+06	2.23227e+07	3.70375e+06	3.15959e+06	3.02002e+06	3.44132e+06
1585	114.951	401.236	7.33411e+06	8.39737e+06	4.11931e+06	1.28483e+07	7.32485e+06	7.74182e+06	6.3023e+06	2.62979e+07	1.50866e+06	3.44473e+06	1.47466e+07	7.51842e+07	4.48679e+07	3.64305e+07	1.52281e+07	5.72705e+06	2.03158e+07	1.01523e+07	4.41764e+07	2.53779e+07	1.24105e+07	2.09268e+07	1.41754e+07
1586	424.885	592.278	50679.7	21988.7	394368	57645.6	260531	20191.3	32241.2	54483	0	0	0	0	0	0	0	0	0	0	0	0	44495.2	48441.3	74139.6
1587	53.8919	160.132	3.04855e+06	822646	3.16588e+06	695938	225155	2.35266e+06	516241	1.27387e+06	102166	129696	5.40741e+06	2.66849e+06	5.76654e+06	9.44045e+06	2.73181e+06	3.4691e+06	4.66659e+06	3.94069e+06	3.34761e+06	3.83727e+06	1.95219e+06	2.21667e+06	1.99435e+06
1588	140.026	547.334	2.37485e+06	2.18267e+06	3.02343e+06	2.04422e+06	344123	1.95302e+06	1.90689e+06	3.12486e+06	372568	0	812234	1.71526e+06	810597	579548	56005.8	278819	634871	173882	1.43121e+06	1.15124e+06	1.77083e+06	1.09741e+06	1.41215e+06
1589	343.836	423.257	50604.7	0	9641.82	0	289243	24249.4	178328	10989.6	429528	1.38942e+06	9669.75	149848	0	0	0	656891	20246.2	318400	30236.3	0	157739	109844	159592
1590	54.6554	444.278	9.48277e+06	7.25122e+06	4.89972e+06	4.54154e+06	7.05941e+06	1.05113e+07	6.10812e+06	1.05568e+07	1.80738e+06	1.70336e+06	1.22425e+06	3.12673e+06	2.05891e+06	2.92569e+06	1.25326e+06	954713	1.71776e+06	1.05987e+06	2.83215e+06	1.38286e+06	3.88185e+06	3.88775e+06	3.76731e+06
1591	93.4375	326.179	4.63719e+06	274339	2.6925e+06	159640	0	1.31302e+06	0	759456	1.60543e+06	749232	574655	1.00508e+06	774070	1.55851e+06	935777	750911	285448	550678	1.34708e+06	658897	716286	416461	844091
1592	234.952	618.367	176942	82108.4	330251	178971	354782	193589	126650	338207	18581.1	0	2.64232e+06	4.71795e+06	3.27052e+06	3.17724e+06	1.84062e+06	1.90699e+06	3.31586e+06	1.57515e+06	4.598e+06	3.55693e+06	1.9068e+06	1.84754e+06	1.60928e+06
1593	51.1238	898.606	103768	324854	337227	443835	428252	536407	374434	472744	5.89272e+07	3.16255e+07	0	0	0	0	0	0	0	125398	0	0	4.22993e+06	3.67925e+06	4.30323e+06
1594	133.519	274.273	1.25337e+07	2.92517e+06	4.49674e+06	656752	6.55933e+06	1.92871e+06	6.98487e+06	4.44544e+06	1.74263e+07	6.44177e+06	2.31461e+06	7.05313e+06	919262	239121	208509	3.9456e+06	2.37271e+06	5.25097e+06	3.04149e+06	1.62064e+06	5.22677e+06	5.07652e+06	4.92404e+06
1595	33.8871	177.111	1.41204e+06	3.21873e+06	2.46399e+06	3.21662e+06	2.30303e+06	2.66842e+06	2.0213e+06	3.66045e+06	2.73307e+06	1.95994e+06	2.08172e+06	2.00708e+06	2.08455e+06	3.16294e+06	3.32293e+06	2.56621e+06	2.61616e+06	3.05966e+06	2.02757e+06	1.93265e+06	1.98261e+06	2.873e+06	2.99027e+06
1596	66.8883	490.283	3.21647e+06	5.72588e+06	6.69194e+06	4.75428e+06	5.88664e+06	3.31457e+06	3.53171e+06	9.32164e+06	2.58153e+06	1.56172e+06	4.50462e+06	1.37056e+07	8.50046e+06	1.02054e+07	5.41753e+06	3.88461e+06	5.47898e+06	4.20739e+06	1.46549e+07	7.72581e+06	5.97772e+06	5.81486e+06	7.06856e+06
1597	241.674	532.33	69813.6	0	0	0	0	0	0	0	298905	0	344808	253649	168958	38979	155199	197174	256647	195413	91932.6	50893.1	108044	77271.8	84440.5
1598	168.39	364.259	356515	5.81911e+06	6.15593e+06	4.13272e+06	7.28993e+06	0	4.97339e+06	4.30347e+06	5.30339e+06	3.93426e+06	3.58925e+06	2.87794e+06	2.85349e+06	742922	1.32877e+06	6.29702e+06	2.63196e+06	5.03749e+06	3.9636e+06	2.44537e+06	4.73218e+06	4.57913e+06	4.60186e+06
1599	138.659	425.156	2.67796e+06	438203	2.27186e+06	614608	259391	1.62055e+06	384579	1.36617e+06	1.65798e+06	1.73503e+06	0	0	0	0	0	0	0	103800	56573.4	0	503244	390633	470559
1600	100.352	312.288	1.35964e+06	1.46678e+06	2.22995e+06	1.34941e+06	718290	418060	5.51567e+06	3.406e+06	1.01553e+06	524346	0	0	0	0	129904	0	0	0	519842	179036	670132	700284	121144
1601	305.114	133.031	1.19392e+06	1.1024e+06	2.03832e+06	6.46277e+06	7.47051e+06	0	1.99472e+06	1.66535e+06	3.71336e+07	0	3.56813e+06	0	216639	0	1.18933e+06	4.90785e+07	0	3.3618e+07	6.07659e+06	1.0537e+06	1.19585e+07	7.04163e+06	1.07792e+07
1602	470.096	428.174	67386.6	0	311530	195574	57265.9	369620	6421.26	17355.6	127080	270088	0	78132	0	0	0	340790	0	0	368144	0	304916	387351	205760
1603	322.031	340.196	1.07643e+06	0	0	683010	3.51847e+06	0	49635.9	0	38394	1.32429e+06	20340	0	0	0	0	1.4434e+06	0	425825	35301.1	20118.7	427847	461326	618204
1604	141.596	222.111	1.19929e+06	2.06895e+06	1.22665e+06	533206	1.1593e+06	351544	2.47772e+06	3.60629e+06	1.54499e+06	191277	1.88948e+06	816917	1.98986e+06	1.97413e+06	8.0966e+06	3.53821e+06	3.38046e+06	1.26178e+06	5.43894e+06	3.62189e+06	1.15817e+06	1.38692e+06	563923
1605	193.324	429.173	2.95227e+06	980725	3.67127e+06	848628	157921	2.3046e+06	1.06639e+06	2.18846e+06	1.6697e+06	1.94148e+06	164649	152249	0	51967	0	85536.5	228620	49325.8	105031	0	1.66031e+06	1.63067e+06	1.94338e+06
1606	427.777	288.104	701867	232355	69091.5	460329	212532	872000	416859	538038	680606	36157.6	1.05696e+06	0	854120	721219	2.03281e+06	1.40758e+06	956268	538168	4.245e+06	787501	660176	704383	649940
1607	237.195	662.391	69758	128410	148818	51016.1	28110.6	31940.2	0	124195	80034.7	0	3.17721e+06	5.88895e+06	3.5822e+06	3.31104e+06	2.18135e+06	1.81749e+06	3.38797e+06	2.07838e+06	5.38606e+06	4.56246e+06	1.98085e+06	2.15235e+06	2.04705e+06
1608	380.933	285.087	191010	32324	79508.6	71858.9	466583	45824.6	1.48421e+06	145286	382731	9.57927e+06	1.53815e+06	1.31497e+06	8473.23	0	0	531228	82023.5	84779.9	0	0	531054	373234	474822
1609	334.421	263.018	152939	21659.8	0	148905	359386	0	309538	35610.8	803113	2.63842e+06	91376.1	382208	162450	15606.6	180452	817261	192580	531916	153895	151525	445030	366703	398554
1610	81.7967	578.372	927246	1.92774e+06	2.05658e+06	1.97683e+06	1.44265e+06	1.97331e+06	1.95315e+06	2.7755e+06	4.23639e+06	0	6.3372e+06	0	68321.6	0	4.29038e+06	3.92868e+06	7.80236e+06	6.48761e+06	0	0	3.26243e+06	2.55464e+06	2.1224e+06
1611	317.049	500.158	38422.6	250280	495167	539767	0	61115.1	67828.4	492998	37533.4	0	429374	29300.5	984804	354752	116605	162889	316534	0	961582	953115	204403	150071	79502.6
1612	356.622	259.071	539265	42259.6	337372	309602	591900	152676	143178	133355	441811	1.3083e+06	0	601774	23780.8	159320	10545.5	151113	57224.3	154921	75262.4	12623.3	245010	177383	248227
1613	232.289	388.304	3.12614e+06	1.19711e+06	2.04093e+06	273439	814367	799215	2.13965e+06	248324	2.10508e+07	8.90328e+06	172499	4.01266e+06	215131	200820	217584	205747	457584	542042	144841	312103	2.44862e+06	2.09405e+06	2.13156e+06
1614	302.343	520.294	924359	572785	523729	408951	518375	672708	634210	781215	38105.8	0	4.0755e+06	9.67592e+06	4.54639e+06	4.08794e+06	1.9388e+06	2.85446e+06	4.18018e+06	2.15652e+06	6.43497e+06	5.60518e+06	3.09597e+06	2.9786e+06	2.36982e+06
1615	257.756	464.211	832643	962255	2.09769e+06	1.10332e+06	1.0784e+06	1.55905e+06	2.36445e+06	299276	419685	1.325e+06	24111.1	0	0	27058.1	11165	144159	0	60276.7	0	43358.6	623447	773298	699889
1616	217.304	257.137	0	445681	117863	93954.3	0	0	0	0	0	0	2.39261e+06	1.1382e+06	1.05847e+06	1.06172e+07	2.3345e+06	6.66627e+06	4.9288e+06	1.27329e+06	4.19115e+06	1.52814e+06	1.35865e+06	1.49778e+06	1.45213e+06
1617	52.7978	740.46	685554	846588	429441	600650	648302	268399	1.12523e+06	1.05761e+06	288617	148526	831958	262251	226731	245729	1.07318e+06	484859	1.44685e+06	949378	257363	365901	516172	531581	177093
1618	370.112	460.237	1.76443e+06	1.15206e+06	588220	290923	1.1631e+06	484883	463567	1.0178e+06	156045	0	33636	0	0	0	0	31063.9	0	0	0	0	382551	376605	294758
1619	237.041	378.173	1.24264e+06	388865	762679	1.0334e+06	806752	1.08125e+06	1.01322e+06	227630	166930	355882	0	237475	93235.5	270738	222775	129874	180489	377869	538265	53996.4	554824	537027	412216
1620	118.448	503.309	3.04073e+06	1.09109e+07	3.71219e+06	3.09486e+06	2.28987e+06	3.05553e+06	3.47603e+06	3.34443e+06	384756	267363	2.86398e+06	4.37964e+06	1.80288e+06	1.86273e+06	944551	1.1635e+06	688006	1.40488e+06	2.78329e+06	3.23616e+06	3.0378e+06	8.8112e+06	2.58254e+06
1621	338.342	381.185	19509.6	0	225987	553554	892536	0	210184	230012	2.51324e+06	6.03403e+06	13344.7	274910	23541.2	0	19247.5	3.37938e+06	40317.4	180766	253308	107307	715148	688873	747859
1622	199.769	496.2	1.75383e+07	5.62714e+06	2.36603e+07	5.53237e+06	5.63042e+06	6.44334e+06	7.97186e+06	9.36496e+06	1.28019e+07	1.66801e+07	1.02361e+08	1.66935e+08	1.18165e+08	1.63785e+08	2.70863e+08	2.02182e+08	1.82471e+08	1.67184e+08	1.54475e+08	1.53192e+08	7.20272e+07	7.415e+07	6.92516e+07
1623	253.216	448.216	0	22454.4	0	0	0	0	0	0	0	0	659895	1.19128e+06	569412	856232	441840	908583	443611	685375	516892	54606.3	307172	346154	206290
1624	75.6613	388.251	2.77586e+09	2.62544e+09	1.71382e+09	1.51142e+09	2.41224e+09	3.40025e+09	2.50786e+09	5.10854e+09	1.89461e+09	1.23427e+09	6.67292e+08	2.01689e+09	1.42143e+09	2.06147e+09	6.90161e+08	4.17287e+08	9.52233e+08	4.77061e+08	2.18903e+09	1.13502e+09	2.08113e+09	2.1232e+09	2.20017e+09
1625	270.206	511.25	0	0	0	0	0	0	0	0	0	0	3.54728e+06	2.16998e+06	914628	1.58019e+06	848022	2.69321e+06	588110	4.20782e+06	1.05026e+06	245543	654734	943646	326778
1626	283.782	534.309	1.39505e+07	7.06431e+06	5.1262e+06	4.83363e+06	3.15824e+06	9.39516e+06	3.43742e+06	8.99619e+06	1.44839e+06	480095	4.10428e+06	4.37673e+06	3.45814e+06	3.21436e+06	1.96533e+06	1.26284e+06	3.84346e+06	2.07762e+06	4.27504e+06	3.52862e+06	4.70576e+06	5.34561e+06	4.66562e+06
1627	90.7753	471.256	0	0	0	0	0	0	0	0	0	0	2.24178e+06	3.87422e+06	3.02503e+06	1.53394e+06	2.53888e+06	2.98135e+06	2.55382e+06	3.69077e+06	6.13506e+06	1.60031e+06	1.64312e+06	1.23638e+06	1.78182e+06
1628	121.298	455.167	8.12378e+06	4.32777e+06	6.87511e+06	883311	1.20692e+06	8.02682e+06	1.56516e+06	3.87473e+06	1.34666e+06	4.54699e+06	0	0	0	0	45317.5	0	0	56496.3	0	0	1.27566e+06	1.47203e+06	1.37309e+06
1629	274.76	520.273	6.76344e+06	0	0	30389	0	0	0	0	487063	0	0	142303	118632	40932.5	0	180693	39502.3	131355	33412.1	115409	72247	151671	0
1630	259.909	488.304	1.0901e+07	76717	0	385974	0	61043.3	183352	106759	215561	43055.8	288148	77446.8	22096.2	17707.6	18025.8	0	179030	0	37154.8	103579	922652	679587	738746
1631	148.194	154.049	4.53002e+06	5.61921e+06	7.90061e+06	1.16501e+06	3.46365e+06	7.73935e+06	2.13233e+06	6.76212e+06	5.06702e+06	5.58233e+06	75651.9	0	155106	80525.5	435172	0	251281	0	0	487720	1.34405e+06	1.64272e+06	1.4724e+06
1632	269.524	210.111	1.71287e+06	699282	2.85827e+06	781235	507271	1.06401e+06	874909	876731	2.30663e+06	1.02066e+06	3.11951e+06	2.62328e+06	968307	1.19868e+06	1.75951e+06	4.95183e+06	3.62954e+06	2.77093e+06	6.57419e+06	1.47712e+06	2.05283e+06	2.09872e+06	1.79912e+06
1633	141.584	314.34	1.55768e+07	1.55738e+07	3.09534e+07	1.80879e+07	1.05959e+07	1.31561e+07	3.88819e+07	3.27335e+07	2.30116e+07	9.10222e+06	1.17782e+07	9.3182e+06	8.91608e+06	1.2544e+07	2.00883e+07	8.73241e+06	1.1472e+07	1.3138e+07	1.20746e+07	1.60422e+07	1.28515e+07	1.32592e+07	1.34845e+07
1634	231.058	483.124	131399	632949	424246	283794	444636	446993	559346	210314	221020	58964.3	0	0	0	0	0	0	0	0	0	0	281075	164868	227678
1635	218.224	438.295	2.35808e+08	8.96349e+07	3.89167e+07	6.58381e+06	2.8657e+07	2.016e+08	1.35854e+08	1.51289e+07	4.01127e+07	4.16045e+07	9.64676e+06	8.43176e+06	6.54157e+06	4.35291e+06	1.96299e+06	5.05754e+07	1.20442e+07	1.07751e+07	1.12102e+07	3.20344e+06	4.88068e+07	4.90855e+07	4.50829e+07
1636	36.4445	365.193	0	0	0	32823.4	0	0	0	0	0	0	3.54635e+06	3.77453e+06	723226	1.84727e+06	2.57285e+06	5.95509e+06	1.07522e+06	2.84058e+06	911691	2.55052e+06	1.58372e+06	790988	918155
1637	141.624	598.245	2.94626e+07	4.27543e+07	3.15677e+07	2.93605e+07	1.82573e+07	4.4886e+07	4.24404e+07	2.53179e+07	1.98749e+07	1.59431e+07	2.06847e+08	7.18415e+07	7.09533e+07	1.03181e+08	1.85958e+08	1.3803e+08	1.08245e+08	3.41909e+07	1.5232e+08	1.31431e+08	6.96031e+07	7.48744e+07	7.53857e+07
1638	223.186	603.531	3.68146e+06	882029	3.00697e+06	3.59371e+06	3.89784e+06	1.12789e+06	575160	928443	4.84589e+06	5.44833e+06	1.09733e+06	1.09071e+06	1.67388e+06	335370	1.2841e+06	3.56397e+06	1.28421e+06	3.88472e+06	2.65841e+06	1.01689e+06	3.09753e+06	2.51459e+06	2.78731e+06
1639	403.728	515.21	1.34216e+08	197038	2.23126e+06	163700	1.53086e+07	3.35064e+06	4.95735e+06	4.34166e+06	1.30735e+07	4.80168e+06	59880.6	4.02605e+06	741454	224789	0	8.52807e+06	613628	3.40317e+06	1.85741e+06	662655	5.59497e+06	5.56224e+06	4.95203e+06
1640	372.796	372.184	2.00533e+06	1.9115e+06	1.42583e+06	673157	1.92871e+06	953045	918314	1.87706e+06	544771	113398	148199	0	34120.5	27852.7	173980	88993.8	430299	233148	0	0	644511	612497	427755
1641	62.7924	446.256	3.01283e+06	6.26551e+06	5.67361e+06	4.11964e+06	6.39766e+06	3.37848e+06	4.03394e+06	9.00605e+06	8.98299e+06	2.03836e+06	6.341e+06	2.1877e+07	1.23289e+07	1.95364e+07	8.69521e+06	5.57725e+06	8.21796e+06	7.19123e+06	2.19682e+07	1.16035e+07	8.1486e+06	8.0776e+06	7.08628e+06
1642	65.5936	399.236	0	0	1.00029e+06	0	0	0	0	0	774228	0	3.32627e+06	5.72706e+06	4.76685e+06	7.76436e+06	6.53906e+06	3.75112e+06	2.59969e+06	5.03111e+06	6.43643e+06	2.59332e+06	1.61884e+06	1.95697e+06	2.95631e+06
1643	420.935	349.195	3.45372e+06	28626.9	1.80025e+06	278087	253956	315627	583597	273867	389513	4.83456e+06	0	0	0	0	0	128479	0	0	11891.8	0	1.53671e+06	680729	635664
1644	192.502	237.111	3.99468e+07	2.28634e+07	4.3762e+07	1.74538e+07	1.8169e+07	3.76971e+07	3.08139e+07	2.47018e+07	2.28172e+07	2.41766e+07	5.00886e+06	2.54852e+06	1.73888e+06	1.52107e+06	3.9889e+06	2.44872e+06	1.04678e+06	1.2229e+06	3.61226e+06	1.42362e+06	2.34883e+07	2.25629e+07	2.22476e+07
1645	281.369	368.226	0	0	0	5.16009e+06	9.18978e+06	0	0	138150	1.38311e+06	396634	241736	0	0	0	0	7.80766e+06	0	205774	0	0	436487	833133	1.40753e+06
1646	148.029	298.272	5.25173e+07	1.26546e+07	2.29097e+07	1.40542e+06	3.15144e+07	5.4071e+06	5.52074e+07	3.04049e+07	5.90796e+07	8.27325e+06	1.16225e+07	3.06263e+07	2.5207e+06	164649	2.18426e+06	1.11668e+07	6.80438e+06	2.54119e+07	5.58917e+06	5.20856e+06	2.06189e+07	2.1066e+07	2.12838e+07
1647	370.042	266.096	2.63253e+06	777780	1.70029e+06	2.08636e+06	2.28572e+06	1.15469e+07	2.49398e+06	2.03169e+06	2.76324e+06	5.54571e+06	777533	3.75124e+06	1.30433e+06	367795	119911	3.0359e+06	677637	3.11479e+06	2.20933e+06	2.95922e+06	3.06565e+06	3.66906e+06	4.63382e+06
1648	211.924	566.221	8.64355e+06	1.65153e+07	2.88338e+07	1.32618e+07	1.1305e+07	1.02293e+07	2.88045e+07	9.41676e+06	1.34642e+07	1.20092e+07	1.07012e+06	0	134501	32790.9	311045	0	104144	0	166789	50444.1	6.05701e+06	7.94742e+06	7.04559e+06
1649	422.132	249.107	1.0304e+06	130832	852849	95593.7	1.93521e+06	207957	288806	188824	6.69807e+06	1.36758e+07	6679.47	2.68625e+06	0	0	23968.5	3.44269e+06	0	496082	1.63891e+06	9026.66	1.13256e+06	1.07281e+06	1.17059e+06
1650	300.321	696.398	1.2031e+06	777626	846361	764958	838659	1.22323e+06	1.09069e+06	1.00403e+06	0	0	2.70438e+06	6.66844e+06	2.76772e+06	2.46008e+06	1.0511e+06	1.8594e+06	2.30064e+06	1.44614e+06	3.74486e+06	3.79351e+06	2.06397e+06	2.16358e+06	1.5822e+06
1651	132.971	696.434	2.05403e+08	1.59071e+08	1.38786e+08	1.07419e+08	1.38316e+08	1.89296e+08	1.63193e+08	2.34763e+08	1.19026e+08	9.77924e+07	5.41454e+07	7.50449e+07	7.19943e+07	6.642e+07	3.69872e+07	3.12756e+07	5.2306e+07	3.75146e+07	8.72633e+07	5.23758e+07	1.09016e+08	1.08275e+08	1.22721e+08
1652	427.526	204.122	1.109e+06	426862	1.47358e+06	299691	729344	847912	910945	621007	676233	1.18735e+06	161177	202531	146679	152803	105091	287231	143986	239223	448669	81359.2	573142	580815	571547
1653	33.4202	249.147	6.63201e+06	1.1616e+06	2.11558e+06	1.33253e+06	1.15634e+06	4.43103e+06	2.99937e+06	886863	972948	1.32875e+06	1.16915e+07	1.16339e+07	8.3607e+06	9.01549e+06	1.31671e+07	1.93968e+07	9.72255e+06	9.69568e+06	1.01115e+07	8.64335e+06	4.47226e+06	5.1529e+06	4.33384e+06
1654	243.856	310.148	337520	26123	1.60772e+06	599484	0	68276.4	457215	149412	741478	385222	369402	0	23224.9	67563.5	178101	28377.9	381469	243105	189734	272042	154709	170599	299517
1655	303.263	476.268	716710	391317	302644	449631	307156	483287	425165	530675	0	0	3.54432e+06	1.01991e+07	3.75941e+06	4.35283e+06	1.51772e+06	2.71815e+06	4.1256e+06	1.8297e+06	5.50232e+06	4.81558e+06	2.35037e+06	2.13931e+06	1.93719e+06
1656	264.815	504.263	2.80861e+06	3.19903e+06	3.10725e+06	1.81064e+06	2.13059e+06	1.24441e+06	2.20457e+06	1.04156e+06	646189	125773	501932	138252	76649.1	114102	334345	181335	354785	347975	98588.2	62140.5	1.05912e+06	989420	833353
1657	269.146	372.184	1.56734e+06	341735	3.20477e+06	982922	677874	1.26203e+06	1.26763e+06	454053	1.14032e+06	3.09197e+06	172605	265483	20999.2	80116.4	0	243039	28896.3	69305.5	205786	21131.1	788857	931971	720301
1658	156.425	572.521	3.4342e+06	122595	1.52292e+06	2.93173e+06	1.82919e+06	829328	1.14006e+06	2.18544e+06	4.49458e+06	1.87066e+06	1.71852e+06	2.27383e+06	983527	148312	63234.9	2.00837e+06	942290	1.62668e+06	1.11804e+06	1.7386e+06	1.67463e+06	1.96395e+06	1.95979e+06
1659	304.199	432.242	774431	400051	323318	237747	302037	402222	436070	490693	0	0	2.89564e+06	6.12007e+06	3.06035e+06	2.82106e+06	1.25832e+06	1.62987e+06	2.70767e+06	1.49256e+06	4.32865e+06	3.7713e+06	1.74137e+06	1.54699e+06	1.55656e+06
1660	216.209	285.11	2.25647e+06	1.1072e+06	2.8008e+06	1.14835e+06	1.52204e+06	1.38765e+06	2.12505e+06	1.20584e+06	873643	832251	103134	33517.6	47453.2	0	53546.2	49572.3	65137.3	0	102521	86709.6	1.01674e+06	954555	892709
1661	147.123	494.236	0	0	0	0	0	0	0	0	0	0	1.13523e+07	6.04801e+06	3.91121e+07	1.40856e+08	2.9796e+07	1.40419e+07	2.95476e+07	7.99997e+06	4.5216e+07	3.5405e+07	1.6245e+07	1.67442e+07	1.66731e+07
1662	274.411	217.096	6.30216e+06	1.8603e+07	9.0452e+06	3.27272e+06	7.21431e+06	2.54014e+06	6.30145e+06	5.03784e+06	5.27698e+06	9.91659e+06	1.27477e+06	85344.9	299715	439937	1.62194e+06	1.40534e+06	535940	428629	4.91491e+06	770671	5.82672e+06	7.14476e+06	4.61758e+06
1663	139.388	344.314	2.98398e+07	1.01864e+07	5.66435e+06	891836	1.35551e+07	2.61541e+06	6.36745e+06	1.16061e+07	1.11586e+07	2.49144e+06	3.36329e+06	9.74439e+06	1.40246e+06	985790	467650	2.69395e+06	2.29369e+06	6.49951e+06	2.32359e+06	3.63849e+06	6.40254e+06	6.62029e+06	6.9066e+06
1664	408.873	324.127	87389.8	255636	914565	968765	205946	177277	40996.9	259068	698433	369596	393636	164010	168661	161430	275230	447043	60649.3	148744	1.22501e+06	910165	777968	780384	918060
1665	124.132	462.289	2.78633e+07	7.42159e+07	5.77739e+07	4.1012e+07	5.11133e+07	5.9116e+07	6.71068e+07	4.61287e+07	4.64744e+06	6.27526e+07	6.15871e+07	1.17068e+08	1.59753e+08	1.19375e+08	9.77375e+07	3.29217e+07	8.67188e+07	7.56265e+07	1.44663e+08	1.68269e+08	1.07711e+08	4.61848e+07	1.07274e+08
1666	86.7512	459.276	2.1762e+08	1.90942e+08	1.48917e+08	1.24477e+08	1.86452e+08	2.4671e+08	2.05518e+08	3.5454e+08	1.55667e+08	1.13377e+08	3.6932e+07	1.22544e+08	8.02202e+07	9.33241e+07	3.34363e+07	2.44776e+07	5.37588e+07	3.06859e+07	1.12321e+08	5.47235e+07	1.43229e+08	1.43462e+08	1.56364e+08
1667	97.9821	605.417	0	0	0	0	0	104335	0	0	0	0	777560	654878	623932	406664	90261.4	791221	423436	1.19136e+06	435308	629401	213756	129582	274319
1668	247.083	386.237	1.90859e+06	210096	864708	404986	304633	225680	344303	401318	1.41431e+06	493055	698814	421947	448317	349666	195925	315388	515951	399594	323532	289239	366085	452969	430774
1669	102.792	492.278	0	0	0	76888.6	74904.3	0	0	0	0	0	1.65395e+06	2.1305e+06	1.72759e+06	699704	1.69111e+06	2.18322e+06	1.30661e+06	2.79548e+06	3.25406e+06	1.21403e+06	1.16486e+06	1.07722e+06	1.29669e+06
1670	321.125	676.386	0	0	0	0	0	0	0	0	0	0	336322	253376	228662	217659	123831	352161	187123	485425	316432	34200.9	43604.4	124642	108655
1671	111.394	355.209	0	0	0	0	0	0	0	0	0	0	6.1504e+06	7.52225e+06	1.71077e+06	2.68343e+06	4.43069e+06	5.48887e+06	1.57184e+06	3.27442e+06	7.19927e+06	1.37365e+06	2.41447e+06	2.45349e+06	2.27765e+06
1672	56.5851	488.303	6.91976e+06	5.73426e+06	3.33601e+06	3.02258e+06	4.36528e+06	6.23463e+06	5.24514e+06	8.62638e+06	0	0	826962	1.56998e+06	1.1906e+06	1.81658e+06	772414	328135	1.13388e+06	820204	1.96651e+06	821234	2.7105e+06	2.73913e+06	2.52126e+06
1673	265.202	416.247	1.17845e+07	741740	242023	589563	550134	723544	787560	833445	1.7186e+06	230219	5.6401e+06	7.31611e+06	4.26845e+06	3.23492e+06	3.03558e+06	5.81839e+06	2.60878e+06	8.42339e+06	9.66953e+06	1.64573e+06	2.66162e+06	2.3364e+06	1.98469e+06
1674	226.465	744.304	1.11209e+06	460601	1.44232e+06	329934	584728	814407	639317	1.40199e+06	105012	368183	0	0	0	0	0	0	0	0	0	0	427122	442567	427027
1675	241.797	332.216	1.401e+07	415740	3.66513e+06	9.6094e+06	3.37456e+06	1.26239e+06	747086	323096	1.08394e+07	1.60194e+07	3.32584e+06	2.83888e+06	371431	30499.6	131275	2.07621e+07	298295	838142	1.55403e+06	105006	4.67205e+06	4.11366e+06	4.91142e+06
1676	445.466	353.19	428574	0	470814	278095	176454	28157.2	104449	58733.8	232445	93773	7607.17	138220	0	65121.9	0	227744	0	0	390969	0	237036	203584	190341
1677	37.2032	417.151	1.59737e+07	1.27976e+07	1.31996e+07	1.0258e+07	1.70381e+07	1.57696e+07	2.32385e+07	6.81738e+06	7.93436e+06	1.01542e+07	3.58146e+06	1.44502e+06	2.98035e+06	4.02686e+06	2.05209e+06	2.91425e+06	4.81555e+06	1.42184e+06	3.14668e+06	2.83549e+06	5.42321e+06	6.4979e+06	4.89133e+06
1678	451.059	264.106	1.69782e+06	417103	2.04837e+06	598331	375058	671189	484130	1.00849e+06	1.7729e+06	1.30626e+06	207521	326986	141642	17506.9	218755	746932	420452	473483	718512	86221.8	1.61712e+06	1.49999e+06	1.29951e+06
1679	102.022	547.331	4.48932e+07	3.64642e+07	3.11061e+07	2.28741e+07	3.23078e+07	4.54187e+07	3.74727e+07	6.89563e+07	2.72131e+07	2.20645e+07	8.68948e+06	2.19874e+07	1.81067e+07	1.78406e+07	7.85873e+06	5.87129e+06	1.03883e+07	7.39601e+06	2.38369e+07	1.17762e+07	2.78953e+07	2.77286e+07	2.64761e+07
1680	375.535	180.101	552999	523344	834754	725930	597144	529747	845912	1.18288e+06	702848	1.14964e+06	2.46287e+06	1.44036e+06	2.02721e+06	2.46998e+06	3.79398e+06	4.68262e+06	2.89794e+06	2.57668e+06	4.65337e+06	1.67955e+06	1.14252e+06	997193	1.18609e+06
1681	212.875	243.1	2.81028e+06	475366	2.58874e+06	527816	1.56167e+06	1.17116e+06	1.83103e+06	539483	194494	1.07025e+06	687853	2.62791e+06	565305	452138	546917	995878	512636	637411	748749	560077	705994	575491	708878
1682	263.083	372.221	9.34196e+06	1.21005e+06	126747	303389	633604	834485	973830	1.17999e+06	1.65773e+06	201415	994408	370789	156915	163071	404988	477212	620868	682773	164381	50311.7	1.41773e+06	1.23271e+06	1.39306e+06
1683	35.3568	209.152	1.80743e+06	1.03671e+06	1.18835e+06	0	855750	2.80842e+06	809498	1.36481e+06	0	0	3.86672e+07	3.45758e+07	2.89212e+07	6.34879e+07	5.53824e+07	4.1783e+07	3.10245e+07	3.11009e+07	4.65494e+07	2.83522e+07	1.62045e+07	1.32049e+07	1.86291e+07
1684	171.062	403.231	1.31735e+06	2.39775e+06	731910	167985	345677	5.81822e+06	832702	848279	472413	418975	982267	1.2895e+06	2.38742e+06	3.2785e+06	993886	406747	746141	379401	2.90478e+06	1.42385e+06	864046	1.32017e+06	301984
1685	161.898	333.189	0	218764	313145	0	493839	94598.4	151925	503220	0	0	1.15363e+07	2.87957e+07	1.96285e+07	2.42259e+07	1.28813e+07	6.22668e+06	1.8013e+07	7.12562e+06	2.81037e+07	1.66111e+07	1.04331e+07	9.69896e+06	1.00054e+07
1686	153.715	434.381	1.09425e+06	1.16835e+06	880925	1.11009e+06	485061	1.01874e+06	1.43673e+06	748578	842086	959656	571442	0	0	0	551796	373988	449991	646220	0	0	548588	778683	708462
1687	321.284	306.164	6.46993e+06	0	939536	1.92699e+06	7.10896e+06	281594	687470	297994	1.18978e+06	2.5833e+06	558705	703444	0	0	0	5.83811e+06	0	2.05689e+06	596111	0	2.26887e+06	2.5639e+06	2.49845e+06
1688	66.8994	446.294	1.08133e+07	5.95576e+06	5.97865e+06	6.29469e+06	7.3347e+06	7.58289e+06	8.44453e+06	1.26562e+07	1.43191e+07	1.07656e+07	8.20209e+06	9.68596e+06	657472	8.75956e+06	7.17343e+06	4.38225e+06	1.12209e+07	6.20583e+06	6.49136e+06	5.26451e+06	6.48363e+06	7.15166e+06	6.66154e+06
1689	54.6004	474.325	788613	428902	480773	579278	623666	557211	343820	1.00494e+06	2.56795e+06	154493	2.16805e+06	1.82516e+06	2.05689e+06	616102	1.85002e+06	1.21727e+06	2.18755e+06	1.53969e+06	1.64437e+06	590352	1.34291e+06	1.11731e+06	1.13652e+06
1690	63.2195	313.236	0	1.70251e+06	3.4957e+06	2.2275e+06	0	5.9032e+06	2.758e+06	0	0	0	342594	0	190566	0	235884	810484	0	190824	648244	383366	804104	493300	867207
1691	185.208	269.106	6.70346e+07	2.43673e+07	1.25343e+07	3.73063e+06	2.55728e+06	1.2083e+07	2.357e+07	5.15525e+06	4.61546e+07	1.27046e+07	4.05435e+06	4.05916e+06	7.86189e+06	7.55238e+06	3.20806e+06	4.28483e+06	1.00987e+07	1.76702e+07	451551	4.25008e+06	1.70844e+07	1.53641e+07	1.59187e+07
1692	399.265	510.159	0	0	0	0	0	0	0	0	0	0	686116	395043	400229	544489	380997	834413	402652	11700.9	339145	242887	161739	136183	216736
1693	71.3021	460.273	324485	0	1.46959e+06	1.28174e+06	2.22197e+06	980494	2.02247e+06	1.78703e+06	732834	2.01595e+06	1.41361e+06	6.74598e+06	4.05754e+06	5.38751e+06	2.67797e+06	1.33458e+06	2.93873e+06	766046	1.0639e+07	2.6241e+06	2.78824e+06	2.72491e+06	3.62004e+06
1694	229.75	390.188	1.41057e+06	1.38797e+06	1.22033e+06	2.21992e+06	1.38845e+06	890949	2.0124e+06	184041	511686	546029	105902	41340.2	26185.2	0	65154.4	96549.2	12995.6	18969.5	27728.5	14869.5	569278	515228	523522
1695	127.989	345.131	7.69798e+06	3.17625e+06	3.88845e+06	4.04148e+06	4.02624e+06	4.47057e+06	7.33761e+06	1.58034e+06	1.44067e+06	3.91773e+06	218157	62813.3	427621	653415	491072	98993.3	177664	95824	0	400105	2.0099e+06	1.62715e+06	1.30208e+06
1696	94.188	640.619	1.80531e+06	129844	1.05652e+06	913190	802639	1.3338e+06	113990	862504	1.73686e+06	800631	500105	531802	489654	65055.9	0	679322	303533	609364	363133	1.03799e+06	572342	568511	907313
1697	381.964	117.065	5.93332e+06	9.06086e+06	5.96059e+06	8.68348e+06	1.52416e+07	2.79549e+06	9.90385e+06	9.87792e+06	3.0583e+07	2.19559e+07	7.74612e+06	1.69095e+07	1.03628e+07	2.61463e+06	3.36733e+06	1.51957e+07	1.28131e+07	2.51848e+07	7.2651e+06	3.8496e+06	1.53817e+07	1.46103e+07	1.44033e+07
1698	161.734	368.226	0	973246	1.09818e+06	78166.1	1.00718e+06	245410	190800	975871	0	0	1.83445e+07	4.40831e+07	3.12458e+07	3.97798e+07	2.00314e+07	1.03273e+07	2.86277e+07	1.15953e+07	4.4901e+07	2.69568e+07	1.57337e+07	1.63301e+07	1.49871e+07
1699	120.336	445.261	1.62564e+07	1.8628e+07	7.6737e+06	1.04128e+07	1.33042e+07	1.73833e+07	8.2236e+06	1.28311e+07	1.52204e+06	6.82532e+06	1.11255e+07	3.91264e+07	2.98543e+07	5.89413e+07	8.56392e+06	8.29533e+06	1.75647e+07	6.85209e+06	3.61975e+07	4.20436e+07	2.73643e+07	2.53815e+07	9.23017e+06
1700	35.1021	289.177	54554.2	60227.4	0	0	56669.1	0	45499.7	191165	0	87529.8	2.03101e+06	2.90432e+06	2.15126e+06	3.73909e+06	5.4972e+06	5.74043e+06	1.03052e+06	1.36931e+06	3.12271e+06	3.43334e+06	2.12616e+06	1.79031e+06	1.92127e+06
1701	247.126	639.223	148645	168069	92249.6	86251.4	301599	750526	171148	186547	319844	277353	0	0	0	0	0	0	0	0	0	0	151270	126206	174445
1702	282.713	402.231	3.30017e+07	1.77606e+07	1.08773e+07	1.01268e+07	7.52476e+06	2.28291e+07	5.39842e+06	1.78135e+07	2.95716e+06	1.31046e+06	1.34651e+07	1.90441e+07	1.41003e+07	1.34719e+07	6.94636e+06	3.87945e+06	1.44051e+07	6.3726e+06	1.38498e+07	1.45292e+07	1.00841e+07	1.05704e+07	9.09966e+06
1703	160.974	361.162	0	0	0	0	0	0	0	0	0	0	6.17478e+06	1.12848e+06	1.82628e+06	3.43959e+06	2.07407e+06	826225	1.80131e+06	0	2.33242e+06	3.27723e+06	773750	720257	664529
1704	394.306	606.262	0	0	0	0	0	0	0	0	0	0	33685.4	211487	118811	0	30900.6	430524	10222	178254	277122	31298.1	31611.5	35469.6	0
1705	202.833	391.051	0	208935	185802	351873	294007	97528.8	0	63043.6	78196.3	305972	403218	387796	411875	72690.4	247285	182611	0	283746	507680	1.28542e+06	400930	299723	294106
1706	148.004	448.178	1.67071e+06	1.39744e+06	1.54574e+07	2.11036e+06	2.17804e+06	2.39586e+06	2.19259e+06	2.08414e+06	1.69216e+06	2.56684e+06	134630	0	0	0	0	30788.4	0	0	117517	100888	2.47123e+06	2.12773e+06	2.23789e+06
1707	34.1534	349.199	0	0	0	0	0	0	0	0	0	0	9.30252e+06	6.52761e+06	4.89324e+06	3.53195e+06	7.28522e+06	1.00364e+07	2.59286e+06	6.52394e+06	5.16873e+06	4.39162e+06	2.72827e+06	2.47576e+06	4.22523e+06
1708	352.963	272.159	134038	14751.4	0	0	537319	38829.3	89953.2	22938.7	443058	3.06789e+06	40342.7	4.44309e+06	19051.2	1.33618e+06	26977.4	1.72458e+06	361238	1.22615e+06	237238	242786	1.14116e+06	1.1403e+06	1.03998e+06
1709	346.603	498.179	172457	17033.1	167812	33848.3	58246.8	83742.6	54792.3	68479.2	57996.6	184599	127156	601567	86006.1	295051	139355	201191	41218.2	114117	201585	192660	156691	162185	164153
1710	92.3855	399.2	0	0	0	57851.8	0	0	0	0	0	0	3.7875e+06	5.37119e+06	2.34145e+06	1.35946e+06	1.99827e+06	4.04354e+06	1.41542e+06	4.83041e+06	6.112e+06	1.47003e+06	2.01776e+06	2.31012e+06	2.23023e+06
1711	244.099	363.21	90771.6	0	147217	1.97541e+06	790005	0	184469	13975.5	386732	710259	89535.4	153482	106412	130407	17059.2	1.5233e+06	127543	266903	123842	104731	174402	168480	172318
1712	268.491	359.227	7.35607e+06	175812	2.6358e+06	1.25548e+06	8.09708e+06	732570	175736	323211	7.89051e+06	7.55466e+06	597949	1.92613e+06	97939.3	21432.5	0	1.06081e+06	34328.5	1.08506e+06	1.93348e+06	100522	2.80108e+06	2.71137e+06	2.01784e+06
1713	88.8967	413.142	450402	0	9.27997e+06	3.42011e+06	2.69525e+06	2.0393e+06	2.24748e+06	2.87534e+06	1.06621e+06	1.47633e+06	0	0	0	0	0	0	0	0	0	0	1.21526e+06	1.47027e+06	1.38482e+06
1714	52.9242	400.252	7.95343e+06	8.42203e+06	5.30962e+06	1.00822e+06	6.17368e+06	1.05494e+07	7.52416e+06	1.17087e+07	304149	0	1.9118e+06	3.93142e+06	2.54426e+06	3.24088e+06	2.12718e+06	1.00364e+06	3.63681e+06	1.39669e+06	3.16075e+06	1.93318e+06	4.35571e+06	3.93526e+06	4.22922e+06
1715	241.447	574.246	318972	89011.8	326279	381093	62222.9	236088	297751	151002	234270	235815	0	0	0	0	0	0	0	0	0	0	79903.2	143394	131050
1716	138.964	318.189	0	0	0	0	40173.1	0	0	0	0	0	535106	636300	605168	474963	1.84329e+06	2.19514e+06	850873	460923	8.14979e+06	1.34874e+06	147698	66270.7	117090
[truncated: 8,134 more rows]
