# Supplementary material for: The vaginal metabolomics profile with features of polycystic ovary syndrome: a pilot investigation in China
Source: PeerJ. 2024 Oct 8;12:e18194. doi: 10.7717/peerj.18194 (PMC11468964; doi:10.7717/peerj.18194)
Supplement: Supplemental Information 5 — Raw data of detectable metabolites in negative ion mode. Each row represents a detectable metabolite and each column represents a participant. [file peerj-12-18194-s005.xlsx]

## Sheet: Sheet 1
ID	rtmed	mzmed	ca01	ca02	ca03	ca04	ca05	ca06	ca07	ca08	ca09	ca10	co01	co02	co03	co04	co05	co06	co07	co08	co09	co10	QC01	QC02	QC03
1	208.151	89.0231	3.63372e+08	4.18683e+08	4.24683e+08	4.52838e+08	6.32857e+08	2.73224e+08	5.36408e+08	5.66418e+08	4.89405e+08	1.12672e+09	3.78766e+08	3.04305e+08	3.21412e+08	2.57921e+08	3.60012e+08	3.39191e+08	1.96804e+08	3.30495e+08	5.15029e+08	5.86415e+08	3.51818e+08	5.63256e+08	3.07209e+08
2	183.844	96.9686	852693	1.45998e+06	794558	1.4855e+06	898191	1.78926e+06	1.57869e+06	596906	1.63879e+06	1.64333e+06	1.29105e+06	1.01207e+06	475567	1.2721e+06	510524	1.38203e+06	1.74452e+06	1.49006e+06	1.62705e+06	669470	1.56494e+06	1.82963e+06	1.69869e+06
3	295.859	130.086	3.35577e+08	8.92612e+07	1.38714e+08	1.24168e+08	4.50509e+08	5.67367e+07	2.78807e+08	2.0699e+08	9.59597e+08	1.84522e+09	7.76949e+07	6.03818e+08	8.34663e+07	2.80723e+07	5.32873e+07	5.79483e+08	1.43854e+08	4.05397e+08	1.67528e+08	7.71304e+07	4.15476e+08	4.00509e+08	4.24615e+08
4	50.6332	115.002	8.47874e+06	4.73174e+07	5.83584e+07	5.36645e+07	4.93426e+07	8.42927e+07	3.0831e+07	3.48615e+07	7.60296e+07	3.39966e+07	7.26793e+08	8.92116e+08	5.89505e+08	4.69015e+08	5.88431e+08	7.81393e+08	4.39417e+08	8.51893e+08	7.7076e+08	5.44096e+08	2.52907e+08	2.46611e+08	2.54002e+08
5	37.1851	281.248	6.89426e+08	4.71409e+08	2.07092e+08	3.3098e+08	2.25644e+08	9.69152e+08	7.30299e+08	6.55856e+08	3.06065e+08	2.48588e+08	8.89373e+07	2.19606e+08	1.24958e+08	9.36084e+07	8.45784e+07	2.38748e+08	1.16693e+08	1.49603e+08	1.67566e+08	1.23966e+08	3.59406e+08	3.97787e+08	3.73477e+08
6	37.3362	279.232	4.29422e+08	2.00234e+08	1.64872e+08	1.89254e+08	7.87068e+07	5.22569e+08	4.9722e+08	3.402e+08	1.28945e+08	8.88577e+07	4.99117e+07	6.78624e+07	4.86419e+07	3.23786e+07	8.15987e+07	1.31767e+08	5.48385e+07	6.48709e+07	1.03172e+08	2.52152e+07	2.04103e+08	2.15181e+08	2.04479e+08
7	37.276	253.217	1.10941e+08	2.39667e+08	4.80055e+07	8.36892e+07	2.41301e+07	7.55947e+07	1.72617e+08	3.90228e+08	5.50694e+07	3.91146e+07	1.4486e+07	4.75916e+07	1.09687e+07	9.95882e+06	9.2444e+06	1.92595e+07	1.62934e+07	1.49497e+07	1.84516e+07	3.07394e+07	9.90378e+07	1.03302e+08	9.97366e+07
8	37.3387	255.232	1.05878e+09	1.78483e+09	9.42072e+08	1.46435e+09	4.63129e+08	1.12157e+09	9.82922e+08	9.85446e+08	5.22476e+08	4.55613e+08	3.96274e+08	4.55363e+08	3.4344e+08	2.50931e+08	3.70979e+08	4.45304e+08	4.0046e+08	4.83162e+08	4.3491e+08	3.0231e+08	8.13977e+08	8.76883e+08	8.37439e+08
9	37.7149	121.028	8.23027e+07	1.53019e+08	4.2997e+08	2.27013e+08	2.34061e+08	1.43186e+08	1.78659e+08	1.45826e+08	2.245e+08	1.6429e+08	2.38796e+07	4.44267e+07	3.08332e+07	3.55536e+07	2.94965e+07	2.80963e+07	3.44052e+07	2.78417e+07	4.63446e+07	3.74672e+07	1.44012e+08	1.46322e+08	1.43888e+08
10	37.4646	367.357	3.9674e+07	5.36161e+07	3.4822e+07	3.77512e+07	3.98746e+07	2.57726e+07	3.99687e+07	4.86938e+07	3.40226e+07	2.54906e+07	3.02011e+07	3.6558e+07	2.24134e+07	1.31765e+07	1.39364e+07	5.02462e+07	3.11401e+07	3.02621e+07	3.05122e+07	1.9451e+07	3.37049e+07	3.61127e+07	3.49528e+07
11	50.6062	255.232	5.77533e+08	9.27913e+08	6.76804e+08	1.23211e+09	2.37355e+08	1.10206e+09	4.15791e+08	6.40265e+08	2.48558e+08	1.92313e+08	5.64541e+08	5.7677e+08	6.12191e+08	3.85162e+08	6.01264e+08	6.18227e+08	6.68782e+08	6.98319e+08	5.9662e+08	5.55344e+08	5.09984e+08	4.97672e+08	5.1615e+08
12	320.094	116.071	2.05502e+08	6.585e+07	8.23284e+07	7.85619e+07	3.65273e+08	4.73682e+07	1.68773e+08	1.18692e+08	4.31854e+08	8.96765e+08	6.85963e+07	2.55747e+08	5.48065e+07	2.41919e+07	2.64736e+07	3.65851e+08	5.80674e+07	2.14348e+08	1.1678e+08	5.14366e+07	2.22774e+08	2.15861e+08	2.21333e+08
13	329.898	114.055	3.97676e+07	4.32772e+07	2.49961e+07	1.09217e+08	5.12288e+07	1.75654e+08	2.51233e+07	3.07233e+07	7.3941e+07	1.64728e+08	1.45622e+07	3.07896e+07	2.12232e+07	1.174e+07	7.67529e+06	7.05048e+07	1.48233e+07	2.36603e+07	2.13636e+07	1.26351e+07	4.87967e+07	4.78766e+07	5.34739e+07
14	187.77	119.049	9.53273e+07	2.40354e+08	1.97698e+08	1.72246e+08	1.23092e+08	1.55362e+08	1.49423e+08	1.63937e+08	1.52707e+08	1.02894e+08	4.08574e+06	4.57378e+06	5.39854e+06	4.22314e+06	4.7161e+06	4.2914e+06	3.78149e+06	4.07118e+06	4.70964e+06	4.36826e+06	1.03706e+08	1.0156e+08	9.54796e+07
15	172.769	134.046	3.13318e+08	2.6296e+07	3.43326e+08	1.16181e+08	3.04623e+08	4.08733e+07	5.62725e+08	6.00845e+07	1.78918e+09	4.86245e+08	1.61471e+08	2.1416e+08	8.19723e+07	4.7672e+07	1.5767e+07	3.04996e+08	1.38159e+08	1.45849e+08	8.15707e+07	4.02787e+07	3.25704e+08	3.1776e+08	3.22269e+08
16	36.8025	147.044	1.05463e+07	1.65698e+07	3.06511e+07	2.50026e+07	2.23644e+07	2.35282e+07	2.39807e+07	7.03568e+06	1.07392e+07	7.14924e+06	874589	773750	2.20251e+06	3.98542e+06	2.23819e+06	1.89123e+06	1.09968e+06	1.09823e+06	1.43551e+06	1.3355e+06	1.05382e+07	1.06975e+07	1.32722e+07
17	329.005	128.071	1.96506e+06	589684	2.51539e+06	2.61164e+07	1.02882e+06	170858	5.886e+06	1.23646e+06	1.15261e+06	883458	2.99856e+06	0	448965	451301	0	2.762e+06	796371	430584	2.19427e+06	1.80175e+06	2.44221e+06	2.67986e+06	2.7338e+06
18	275.021	131.034	1.64176e+07	1.55537e+07	2.58714e+07	2.70374e+07	2.39924e+07	1.2111e+07	2.05976e+07	2.5584e+07	2.46234e+07	2.14028e+07	9.6914e+06	9.15687e+06	1.4545e+07	1.75472e+07	2.45609e+07	1.30984e+07	1.11709e+07	1.07621e+07	2.46577e+07	1.39418e+07	2.02709e+07	1.99291e+07	2.19631e+07
19	37.5245	269.249	6.43296e+07	1.23805e+08	3.69209e+07	5.03182e+07	2.69496e+07	4.40824e+07	6.75565e+07	8.72934e+07	4.63804e+07	2.88856e+07	2.84696e+07	5.31922e+07	1.8963e+07	1.29512e+07	2.64563e+07	3.00111e+07	3.26527e+07	4.38173e+07	2.7513e+07	2.27264e+07	5.13049e+07	5.1755e+07	5.39505e+07
20	66.4421	178.054	7.0906e+07	2.67792e+07	449460	487828	2.30062e+08	275478	1.97055e+07	1.1954e+08	3.38999e+06	6.77044e+06	280407	357768	395617	950236	157576	944561	227703	763179	59357.3	116443	2.91141e+07	2.94663e+07	2.93363e+07
21	53.3618	299.259	1.55496e+08	7.05821e+07	7.91865e+07	7.84104e+07	3.68904e+07	2.20059e+08	2.13876e+08	1.36924e+08	2.83541e+08	3.80508e+08	4.55027e+07	1.41778e+08	2.77376e+07	1.73278e+07	5.74278e+07	6.54384e+07	4.99005e+07	5.81955e+07	5.38457e+07	2.30927e+07	1.12662e+08	1.06935e+08	1.07065e+08
22	187.756	163.039	4.2287e+08	1.06282e+09	8.88075e+08	7.54427e+08	5.4096e+08	6.88895e+08	7.00238e+08	7.23588e+08	6.85307e+08	4.7064e+08	783579	1.55965e+06	987644	1.07393e+06	1.50927e+06	1.22914e+06	849389	619454	1.42796e+06	763553	4.35423e+08	4.28772e+08	4.36022e+08
23	320.929	128.034	3.26891e+08	2.59507e+08	2.96795e+08	1.53762e+08	3.02042e+08	2.06686e+08	4.08474e+08	3.83589e+08	3.16322e+08	3.40996e+08	2.71817e+08	4.3064e+08	1.37072e+08	7.20666e+07	6.45608e+08	4.10591e+08	4.82473e+08	2.6405e+08	9.45319e+08	4.99789e+08	4.13838e+08	4.19488e+08	4.1527e+08
24	36.4713	137.023	2.77628e+08	1.17092e+08	5.83527e+08	3.4529e+08	1.76823e+08	1.7287e+08	1.62066e+08	3.8334e+08	2.84168e+08	2.41472e+08	8.9052e+07	1.33782e+08	8.06725e+07	8.9145e+07	2.85097e+08	6.79691e+07	1.5594e+08	2.00164e+08	2.26525e+08	1.36495e+08	2.43755e+08	2.49695e+08	2.36625e+08
25	70.219	125.034	7.29673e+08	1.36504e+08	5.77151e+07	6.72901e+07	2.39063e+07	6.91462e+07	1.92795e+08	8.12046e+06	4.27576e+07	5.78571e+07	2.15111e+07	1.09524e+07	8.59734e+06	4.43818e+06	0	1.75703e+07	7.3654e+06	2.98712e+06	9.19808e+06	6.81394e+06	1.4235e+08	1.37584e+08	1.42621e+08
26	37.3374	227.201	1.36093e+07	1.21069e+08	1.99352e+07	2.55442e+07	8.79265e+06	1.2968e+07	1.39172e+07	9.74669e+07	8.38876e+06	5.94133e+06	1.44125e+07	1.60339e+07	1.5327e+07	2.3737e+07	1.29755e+07	1.0874e+07	1.57134e+07	1.50162e+07	1.85661e+07	2.3447e+07	2.6687e+07	3.2714e+07	3.01512e+07
27	67.334	281.248	2.79823e+07	2.51337e+07	1.69535e+07	1.40121e+07	1.21806e+07	4.18875e+07	8.40057e+06	3.08997e+07	1.06435e+07	1.14837e+07	3.58292e+06	1.1008e+07	4.66195e+06	5.67195e+06	4.40301e+06	6.68496e+06	7.59147e+06	7.79293e+06	4.93326e+06	1.10573e+07	6.53971e+06	1.43621e+07	1.96329e+07
28	33.0951	181.991	1.64842e+07	3.58089e+06	6.25611e+06	843581	5.21134e+06	952847	4.64068e+06	1.07043e+09	1.31471e+07	1.83778e+07	374733	489943	130289	671978	719353	554226	473037	2.18722e+06	0	596738	9.19181e+07	9.74479e+07	9.59629e+07
29	50.6945	227.201	1.17068e+07	1.19374e+08	2.37456e+07	4.05855e+07	6.63024e+06	2.54705e+07	9.90887e+06	1.1658e+08	7.2937e+06	3.82564e+06	3.05437e+07	3.4455e+07	4.34576e+07	5.2756e+07	3.28377e+07	2.64335e+07	3.68075e+07	3.60322e+07	3.99288e+07	7.05031e+07	3.39119e+07	3.25506e+07	3.42826e+07
30	355.545	191.055	7.95423e+07	4.29138e+08	3.58191e+08	1.76887e+08	9.01937e+07	9.50527e+07	7.64327e+07	7.86298e+07	2.22059e+08	2.68131e+08	1.47042e+06	1.26035e+06	1.01358e+06	1.51751e+06	1.8862e+06	8.03359e+06	729540	1.46186e+06	1.59011e+06	2.85283e+06	1.37769e+08	1.34207e+08	1.24575e+08
31	37.3387	303.233	6.44792e+07	3.49021e+07	1.40893e+07	3.60338e+07	2.08721e+07	2.48011e+08	9.25452e+07	1.86717e+07	4.01393e+07	6.88551e+07	3.20907e+06	1.62659e+07	6.38081e+06	2.70903e+06	7.19978e+06	3.30846e+07	7.87811e+06	1.47856e+07	1.25842e+07	1.64723e+06	4.05384e+07	3.88995e+07	3.76777e+07
32	165.278	159.102	147742	5.56522e+06	7.86106e+06	6.16077e+06	5.67189e+06	2.84536e+07	3.17004e+06	2.52144e+07	8.35647e+06	4.03639e+06	2.37748e+08	2.64652e+08	2.24759e+08	2.70586e+08	2.51686e+08	2.08593e+08	1.66952e+08	2.18178e+08	3.77284e+08	2.37113e+08	6.96983e+07	7.27426e+07	7.8335e+07
33	36.5414	241.217	2.17184e+07	1.21778e+08	2.09431e+07	3.02164e+07	9.79014e+06	1.76845e+07	2.47721e+07	8.48902e+07	1.40423e+07	6.29604e+06	1.20676e+07	1.17754e+07	7.80873e+06	9.27573e+06	1.13919e+07	1.10914e+07	1.2015e+07	1.34898e+07	1.03396e+07	1.77848e+07	3.1775e+07	3.20853e+07	5.0814e+07
34	456.152	133.013	1.0982e+07	7.06623e+07	4.44933e+07	2.77345e+06	1.10964e+08	1.46573e+07	5.53098e+06	2.58271e+07	2.58262e+08	4.71583e+07	4.45833e+06	1.58973e+06	918206	1.50951e+06	4.83191e+06	2.29538e+06	1.73093e+06	3.3273e+06	4.58129e+06	831107	2.53563e+07	1.78779e+07	1.90784e+07
35	54.1625	129.018	0	6.3323e+07	6.32475e+07	0	6.50429e+07	1.76396e+08	0	5.30661e+07	5.97078e+07	0	5.93827e+08	5.56465e+08	3.32144e+08	3.08881e+08	6.27212e+08	6.91967e+08	3.02816e+08	4.89471e+08	5.89352e+08	4.2297e+08	1.9112e+08	1.81376e+08	2.20537e+08
36	246.916	131.07	4.3994e+06	0	423506	3.98942e+06	869411	914526	8.4784e+06	744586	153903	3.27809e+06	1.32039e+07	1.43861e+07	8.24038e+06	2.12645e+07	1.89216e+07	1.23405e+07	1.10993e+07	8.99747e+06	1.33213e+07	1.57925e+07	4.93868e+06	6.19152e+06	7.22614e+06
37	66.3662	279.232	1.69659e+07	9.86757e+06	7.83705e+06	8.42413e+06	2.39198e+06	2.90922e+07	2.18857e+07	1.71635e+07	5.15807e+06	4.21042e+06	2.08127e+06	3.95847e+06	3.07892e+06	2.42107e+06	4.21383e+06	7.38744e+06	2.82327e+06	3.63969e+06	5.53607e+06	3.17825e+06	1.07809e+07	9.33996e+06	9.61005e+06
38	55.0414	297.243	6.17206e+07	5.67923e+07	6.99106e+07	8.88059e+07	6.36025e+07	2.11962e+08	1.35355e+08	1.09203e+08	1.43476e+08	2.46379e+08	9.58399e+07	2.59844e+08	1.61017e+08	1.96894e+08	1.35515e+08	1.05708e+08	1.16417e+08	9.74587e+07	2.16264e+08	2.24789e+08	1.24406e+08	1.19678e+08	1.16137e+08
39	40.7462	129.054	3.95792e+08	1.5601e+07	8.98132e+06	2.67693e+07	1.00633e+07	7.61606e+07	7.29695e+07	1.43765e+07	5.16988e+06	4.48364e+07	7.49353e+06	2.23556e+07	1.02095e+07	3.83255e+06	6.65786e+06	1.51813e+07	1.73956e+07	4.83515e+06	5.6121e+06	4.85833e+06	4.29192e+07	4.86152e+07	4.03006e+07
40	409.105	174.087	690100	86506.6	651797	366429	1.61615e+06	157236	571094	343346	2.29024e+06	8.19415e+06	141693	808979	177025	306218	0	3.56406e+06	73394.3	165307	1.23295e+06	298636	1.24363e+06	1.25519e+06	1.11683e+06
41	28.5869	367.158	299313	3.47455e+06	1.45965e+07	1.79775e+07	8.32173e+06	1.74466e+07	2.25336e+07	0	1.47915e+06	3.03945e+07	5.95111e+06	1.98707e+06	7.38398e+06	1.21815e+07	4.88311e+06	2.50477e+07	5.65346e+06	1.38457e+07	1.49148e+07	2.51888e+06	9.5011e+06	1.05713e+07	7.72872e+06
42	107.33	255.05	9.47552e+07	2.50873e+07	7.77077e+06	1.62807e+07	3.99516e+07	1.1302e+08	4.91423e+07	4.13083e+06	1.19378e+07	3.19826e+08	1.64258e+07	2.43439e+07	3.52062e+07	4.97864e+06	3.66165e+06	6.51021e+06	3.72129e+07	3.53446e+06	5.1757e+06	2.98514e+06	4.64529e+07	4.78358e+07	4.80731e+07
43	144.593	131.07	2.4388e+09	1.2053e+08	8.50767e+08	2.40566e+09	7.89613e+08	6.6496e+08	4.41668e+09	8.03644e+08	4.43937e+08	1.19594e+09	1.59315e+09	6.7178e+08	5.82751e+08	5.21272e+08	3.94716e+08	2.55475e+09	4.64712e+08	5.89405e+08	9.9389e+08	5.10821e+08	1.22999e+09	1.201e+09	1.09937e+09
44	70.2865	115.039	5.41457e+09	1.27783e+08	8.38034e+06	1.36161e+08	3.18005e+06	8.57159e+08	8.47531e+08	2.75263e+07	5.54929e+06	2.67136e+07	1.04672e+07	2.50036e+07	8.89971e+06	1.00958e+07	1.66897e+07	1.45324e+07	1.06328e+07	1.69738e+07	2.0051e+07	1.5303e+07	2.82927e+08	3.07489e+08	1.48029e+08
45	416.529	146.045	1.00752e+07	1.27001e+07	3.37713e+07	1.26842e+07	9.35351e+07	5.35392e+06	1.141e+07	2.05671e+07	3.29673e+08	4.96859e+08	2.5519e+06	1.84172e+08	5.03091e+06	1.89255e+06	469051	9.1892e+07	1.83993e+06	2.36024e+07	1.06284e+07	1.59599e+06	6.82028e+07	7.26466e+07	7.06241e+07
46	252.396	155.009	4.45173e+07	1.83544e+06	895776	2.989e+06	455691	1.7913e+06	1.14992e+07	981121	6.82662e+06	661920	1.07442e+06	602433	1.28545e+06	1.27406e+06	1.23673e+06	957253	1.04662e+06	1.11649e+06	922317	1.24353e+06	3.0727e+06	3.54193e+06	2.95099e+06
47	96.3922	279.232	2.58453e+07	1.27035e+07	7.04556e+06	4.24358e+06	2.56463e+06	1.60352e+07	2.88158e+07	1.24679e+07	4.34168e+06	4.68397e+06	1.44207e+06	1.96883e+06	795288	1.78686e+06	1.73046e+06	2.3472e+06	1.59692e+06	1.68387e+06	2.33683e+06	2.00199e+06	5.85712e+06	4.82645e+06	7.81971e+06
48	96.8034	313.238	2.36686e+07	1.53353e+07	1.95424e+07	2.8358e+07	1.68121e+07	9.48895e+07	4.55653e+07	4.53538e+07	3.22244e+06	3.611e+06	1.02812e+07	2.81057e+07	4.84064e+07	5.52413e+07	1.55839e+07	9.47663e+06	1.2102e+07	1.14024e+07	2.60589e+07	2.65297e+07	2.39496e+07	2.29645e+07	2.50075e+07
49	230.37	311.295	788970	693906	814447	653226	719319	201689	934938	536728	740513	1.04032e+06	1.33422e+06	1.58159e+06	715847	837199	692295	1.48256e+06	424315	690815	1.86634e+06	1.77599e+06	683491	767308	1.25044e+06
50	28.9051	212.002	4.125e+08	2.16252e+08	3.85936e+08	9.18163e+07	7.43236e+08	5.00688e+08	1.31549e+08	1.61061e+08	1.42227e+08	1.65405e+08	2.23576e+07	7.01623e+07	4.15618e+07	6.29901e+07	2.26498e+07	5.20797e+07	4.87481e+07	3.66531e+08	2.12371e+08	3.52759e+08	2.36018e+08	2.34349e+08	2.37533e+08
51	54.1596	157.122	7.03467e+07	7.78238e+07	2.04275e+08	1.1509e+08	8.46777e+07	1.15455e+08	8.80354e+07	1.10617e+08	9.84961e+07	1.02302e+08	1.79836e+08	1.33587e+08	1.32749e+08	1.72995e+08	1.35645e+08	1.4514e+08	2.35749e+08	1.39545e+08	2.18642e+08	1.89233e+08	6.67714e+07	6.67044e+07	6.76499e+07
52	146.325	345.134	287669	306674	602992	126296	665274	784108	164264	432102	0	0	7.95386e+06	1.55667e+07	3.96171e+06	8.35097e+06	3.19007e+07	4.76381e+06	1.34788e+06	4.83951e+07	2.63151e+06	3.11605e+06	8.20148e+06	8.12218e+06	9.03841e+06
53	466.349	129.018	6.35848e+06	1.85248e+07	1.06625e+07	6.16174e+06	3.8642e+06	9.20884e+06	4.90775e+06	5.4935e+06	9.84301e+06	3.62217e+06	103813	213860	0	565119	0	3.93828e+06	0	3.13237e+06	2.38814e+06	0	6.31014e+06	1.07681e+07	5.2727e+06
54	56.8188	271.228	1.91157e+08	2.43022e+08	1.18141e+08	1.35423e+08	8.30352e+07	1.07481e+08	5.4452e+08	1.96307e+08	1.69299e+08	1.27629e+08	9.55187e+07	1.86002e+08	8.05191e+07	4.92038e+07	6.82322e+07	9.07283e+07	7.41777e+07	9.52147e+07	1.19604e+08	7.75028e+07	1.39286e+08	1.39052e+08	1.32866e+08
55	36.4746	365.342	9.70136e+06	1.16089e+07	4.89106e+06	1.79669e+06	6.31212e+06	8.2956e+06	9.28534e+06	9.48214e+06	7.1271e+06	8.85505e+06	2.71444e+06	5.27004e+06	1.70276e+06	991910	441098	8.85025e+06	1.29184e+06	3.51442e+06	2.03986e+06	2.64143e+06	6.52231e+06	7.06837e+06	6.23246e+06
56	209.19	311.295	588733	727112	926979	416986	466920	198639	930510	566954	1.06011e+06	992778	1.68669e+06	3.76507e+06	639879	815925	782885	1.78884e+06	157750	485507	2.57542e+06	1.54521e+06	1.97081e+06	927165	994305
57	52.4918	295.227	8.01831e+07	2.12937e+08	9.13528e+07	1.15059e+08	4.19969e+07	2.55543e+08	2.11113e+08	1.43952e+08	4.18777e+07	2.98063e+07	7.23005e+07	1.26673e+08	1.23115e+08	1.14652e+08	1.12849e+08	8.24002e+07	6.49258e+07	5.13166e+07	1.52772e+08	1.52562e+08	9.82977e+07	9.78666e+07	1.00479e+08
58	206.434	188.034	2.17608e+07	1.03156e+06	2.11949e+06	2.90169e+06	3.25982e+06	4.67573e+06	1.74743e+06	456622	1.30043e+06	660007	0	0	376454	0	0	533713	374566	2.01264e+06	939306	0	3.03514e+06	2.91472e+06	2.84038e+06
59	37.3852	353.342	1.12481e+07	1.64509e+07	1.70702e+07	2.17335e+07	1.37051e+07	1.22936e+07	1.25194e+07	1.84321e+07	1.57349e+07	8.20608e+06	1.91027e+07	1.46044e+07	1.585e+07	8.96815e+06	1.20994e+07	1.77848e+07	1.75921e+07	1.54847e+07	1.82861e+07	1.1498e+07	1.43544e+07	1.48046e+07	1.37504e+07
60	50.7961	199.17	1.46966e+06	1.97797e+07	1.04125e+07	8.62278e+06	2.21954e+06	8.00208e+06	2.27489e+06	1.82304e+07	1.99156e+06	2.18703e+06	2.79646e+07	3.32675e+07	4.62222e+07	8.41695e+07	3.60931e+07	1.70491e+07	4.74464e+07	2.63646e+07	4.50277e+07	5.05947e+07	1.21164e+07	1.20655e+07	1.18923e+07
61	182.536	112.051	2.68342e+07	3.67258e+06	1.40115e+07	8.30239e+06	3.6919e+07	2.07992e+07	1.3613e+07	2.14578e+07	2.80069e+07	1.8842e+07	5.99056e+06	2.66421e+07	1.50581e+07	9.08178e+06	2.21432e+06	9.55595e+06	5.81984e+06	1.52887e+07	1.55126e+07	3.2244e+07	1.73785e+07	1.76676e+07	1.49892e+07
62	323.582	180.066	4.36939e+07	2.13367e+06	3.43268e+07	1.70109e+07	9.52042e+07	1.11969e+07	1.4955e+07	1.52187e+07	1.05422e+08	2.39089e+08	4.05515e+06	5.6594e+07	7.98768e+06	3.82307e+06	2.69127e+06	1.16499e+08	6.49231e+06	4.45844e+07	1.83338e+07	6.14528e+06	6.02824e+07	6.00855e+07	5.63994e+07
63	256.034	257.175	0	431509	0	135976	0	92040.2	52405	0	0	0	545333	170098	169945	458535	372134	139303	135952	431601	758841	313476	119761	0	130919
64	460.585	173.008	2.21745e+07	7.57765e+07	4.89896e+07	1.65953e+07	1.21933e+07	3.72785e+07	1.86803e+07	1.59427e+07	4.63625e+07	1.16462e+07	1.04053e+06	950594	1.01564e+06	876513	956226	1.72984e+07	1.30604e+06	3.418e+06	6.49977e+06	879546	2.16134e+07	2.36323e+07	1.97809e+07
65	172.876	243.062	2.85444e+07	1.46045e+08	1.06844e+08	3.12062e+07	1.48432e+08	1.36007e+08	2.25833e+07	4.18455e+08	8.72274e+07	1.31923e+08	2.21411e+07	7.25019e+07	1.02284e+08	6.39628e+07	1.18817e+08	3.16387e+07	1.06439e+08	1.007e+08	2.30949e+08	2.05558e+08	9.69953e+07	8.94362e+07	9.30721e+07
66	195.11	193.05	2.10838e+07	9.03e+06	6.20566e+07	2.25406e+07	3.70994e+07	3.13159e+07	2.8504e+07	4.05133e+07	2.23684e+07	2.16885e+07	0	224052	166112	187898	3.59495e+06	99587.3	1.0521e+06	488302	179133	185345	1.74109e+07	1.63998e+07	1.55185e+07
67	31.2952	471.348	5.42343e+06	1.16622e+07	1.74226e+07	1.63451e+07	1.28287e+07	2.51171e+07	1.5261e+07	1.67934e+07	6.88683e+06	8.36232e+06	6.25031e+06	2.17027e+06	720900	947728	6.09167e+06	4.59149e+06	7.06936e+06	7.51904e+06	1.56671e+06	1.01797e+06	5.94768e+06	1.01806e+07	8.30316e+06
68	48.9507	171.011	1.1758e+08	1.14258e+08	1.05651e+08	1.34596e+08	1.02238e+08	4.9033e+08	7.05586e+07	2.63789e+08	2.62769e+06	1.3758e+06	6.16472e+08	1.54745e+09	1.38704e+09	1.18334e+09	4.82942e+08	4.03974e+08	8.51902e+08	5.1988e+08	1.57298e+09	1.0061e+09	2.5803e+08	2.51284e+08	2.5659e+08
69	411.545	147.029	5.23168e+06	1.11197e+07	1.68335e+07	3.93809e+06	6.66698e+06	7.46136e+06	4.56119e+06	5.74976e+06	1.65915e+07	1.88712e+07	1.00035e+06	6.24291e+06	1.20152e+06	1.63342e+06	272641	5.51002e+06	1.72548e+06	1.12272e+06	1.76326e+06	1.12338e+06	6.28612e+06	3.86223e+06	9.64226e+06
70	283.389	203.082	1.04094e+07	2.81277e+06	8.8477e+06	1.07591e+07	5.02295e+07	2.36167e+06	8.53282e+06	6.87111e+06	6.08784e+07	1.39963e+08	3.02245e+06	3.45902e+07	4.31677e+06	1.01699e+06	1.00083e+06	6.5299e+07	5.13549e+06	3.07011e+07	744024	3.90642e+06	3.13191e+07	2.86734e+07	2.6912e+07
71	163.137	124.99	1.8907e+09	3.78129e+08	7.32127e+08	3.15788e+08	5.62189e+08	6.94751e+08	7.45954e+08	3.54647e+08	7.53642e+08	1.93873e+08	5.42368e+07	3.40079e+07	1.2294e+08	1.64254e+08	5.30104e+07	7.66737e+07	6.56793e+07	1.62278e+08	8.78268e+07	4.20457e+07	4.74732e+08	4.66417e+08	4.64926e+08
72	390.771	308.098	2.655e+06	281861	902532	1.57549e+07	2.46917e+06	1.86851e+06	4.87683e+06	593133	643707	6.46624e+06	2.72455e+06	1.08244e+06	78187.5	33569.4	0	1.57693e+06	8192.19	291281	143714	58383.1	2.95439e+06	2.51557e+06	2.6689e+06
73	303.703	144.066	2.46046e+07	1.9731e+06	2.72447e+06	1.71957e+06	2.86973e+06	2.98527e+07	1.49758e+07	3.39125e+06	1.47118e+06	1.92398e+06	2.12182e+06	1.34704e+06	1.63611e+06	1.78567e+06	2.18948e+06	3.23519e+06	2.11254e+06	2.66382e+06	4.59319e+06	3.13444e+06	6.03287e+06	6.27847e+06	6.13712e+06
74	96.7829	311.223	1.85243e+07	1.36504e+07	1.21846e+07	2.38632e+07	9.25207e+06	6.68943e+07	4.69124e+07	1.76904e+07	6.38541e+06	8.92055e+06	3.90667e+06	1.26585e+07	6.92969e+06	9.00331e+06	9.62077e+06	5.69263e+06	4.71396e+06	5.77416e+06	1.1056e+07	1.20058e+07	1.47167e+07	1.70765e+07	1.88552e+07
75	202.487	117.018	0	1.44773e+07	3.1508e+07	1.10098e+07	1.41992e+07	9.57114e+06	0	1.58828e+07	1.39445e+07	3.8533e+07	1.14377e+07	2.60575e+07	1.4711e+07	1.19247e+07	5.33246e+06	1.60456e+07	4.80477e+06	7.38869e+06	4.57867e+07	4.43391e+07	2.2793e+07	1.55489e+07	2.73856e+07
76	589.048	133.013	1.30613e+07	1.41544e+07	1.12345e+07	5.67e+06	8.42859e+06	1.5989e+07	5.70275e+06	1.08233e+07	5.44742e+06	2.09394e+06	9.79939e+06	5.06336e+06	1.14586e+06	2.60364e+06	4.32206e+06	6.94723e+06	1.8662e+06	2.95288e+06	8.3385e+06	1.41346e+06	9.33573e+06	7.34004e+06	1.56621e+07
77	169.061	271.082	2.11278e+07	1.92147e+08	2.98646e+08	1.79161e+08	1.06315e+08	1.73785e+08	1.10632e+08	5.89785e+07	7.47438e+07	8.85929e+07	197757	1.06068e+06	358711	1.62921e+06	0	290440	959948	675301	1.20386e+06	0	7.34251e+07	7.09938e+07	7.22395e+07
78	191.786	425.195	1.53377e+06	191826	3.12725e+06	231070	418496	1.04301e+06	464718	402797	938094	1.43074e+06	108031	160739	27760.3	1.26564e+06	164873	94119.1	51155.4	126884	808101	45595.4	692840	455987	646807
79	340.67	125.035	7.29599e+06	492193	669321	723324	511174	499431	851591	1.05143e+06	866809	950926	273134	123900	304494	373292	443185	251595	170919	294398	317862	286241	757739	766004	955075
80	326.307	135.029	2.63297e+07	1.32587e+07	3.48113e+07	2.36993e+07	8.71578e+06	2.58539e+07	1.44273e+07	3.48793e+07	5.4976e+06	5.00281e+06	1.73053e+06	2.13074e+06	2.05686e+06	863540	2.45831e+06	9.1311e+06	1.6587e+06	5.96572e+06	7.37146e+06	996103	1.14892e+07	1.13776e+07	1.75153e+07
81	338.789	159.077	7.83481e+06	0	6.74646e+06	1.70489e+07	2.18532e+07	2.66612e+06	1.19412e+07	1.14893e+07	5.43417e+07	4.49152e+07	2.90528e+06	2.03551e+07	3.93703e+06	1.04561e+06	610209	2.71698e+07	1.68712e+06	1.65843e+07	4.74646e+06	2.82594e+06	1.86461e+07	1.75282e+07	1.65646e+07
82	299.305	187.102	998077	668001	830382	4.02024e+06	2.98463e+07	893139	3.11212e+06	687001	1.00516e+07	7.84939e+07	1.49223e+06	7.60242e+06	1.23013e+06	1.39023e+06	1.07249e+06	5.22002e+06	710644	6.79125e+06	2.31752e+06	1.78802e+06	3.20657e+06	5.86068e+06	6.19973e+06
83	54.1691	289.073	3.35318e+06	1.1849e+08	3.34468e+08	8.39601e+06	1.71436e+07	2.94518e+07	1.9661e+07	5.85857e+06	2.36046e+07	7.26254e+07	2.17436e+07	3.75666e+07	1.10024e+07	8.19099e+07	6.03089e+07	1.15956e+07	1.75045e+07	1.1152e+07	3.54623e+06	1.9766e+07	1.88782e+07	1.77769e+07	1.88331e+07
84	14.728	225.185	1.99526e+06	1.72671e+06	1.88371e+06	2.12671e+06	2.01923e+06	2.32677e+06	1.99144e+06	1.7257e+06	2.00048e+06	1.76381e+06	2.24129e+06	2.19175e+06	3.00377e+06	2.11718e+06	1.37778e+06	2.2153e+06	2.49411e+06	2.8918e+06	2.01378e+06	2.14338e+06	2.08294e+06	1.90266e+06	1.95527e+06
85	311.163	191.019	5.92335e+06	4.93899e+06	5.91402e+06	1.69397e+07	1.03951e+07	6.49594e+06	9.73447e+06	1.30751e+07	1.16176e+07	1.51888e+07	0	0	0	0	0	0	0	109568	64104.6	0	7.38738e+06	9.034e+06	3.28509e+06
86	233.348	151.025	1.37885e+08	5.12313e+07	3.50924e+07	4.97688e+07	4.44526e+07	5.55921e+07	3.62541e+08	2.66322e+07	1.23813e+06	1.36422e+07	6.17914e+06	745782	878051	2.61032e+06	7.95573e+06	2.15718e+07	2.41317e+06	1.81832e+07	1.63821e+07	1.95953e+07	5.39436e+07	5.24419e+07	5.1958e+07
87	97.5835	209.118	6.49168e+06	3.16617e+06	8.9722e+06	4.20944e+06	2.07652e+06	1.75237e+07	6.98976e+06	4.62019e+06	2.12415e+06	400758	7.46189e+06	1.85871e+07	9.72668e+06	1.45258e+07	1.32658e+07	8.4829e+06	1.0541e+07	1.05825e+07	1.82892e+07	1.40126e+07	1.1678e+07	1.1726e+07	1.1411e+07
88	150.683	137.023	1.31022e+07	1.47175e+07	2.99391e+07	1.35596e+07	1.79817e+07	1.06327e+07	1.8478e+07	1.18595e+07	2.83827e+07	7.86914e+06	2.69519e+07	3.00285e+07	2.38192e+07	2.84008e+07	5.77823e+07	3.17944e+07	2.04662e+07	6.10776e+07	3.55326e+07	6.21499e+07	3.68112e+07	2.96734e+07	3.23866e+07
89	315.307	179.055	5.46956e+07	9.03932e+07	2.97244e+08	2.87959e+08	1.57573e+08	2.44587e+08	1.74677e+08	2.21248e+08	2.11327e+08	4.36123e+08	4.4854e+07	6.01304e+07	5.18069e+07	8.0903e+07	1.45796e+08	1.13136e+08	4.96254e+07	4.93325e+07	1.46563e+08	7.8098e+07	1.52304e+08	1.47545e+08	1.49795e+08
90	212.611	178.05	2.42509e+06	8.15727e+06	3.65216e+06	0	427357	2.4955e+07	149006	1.78086e+07	3.78902e+06	9.66714e+06	0	974117	1.33522e+06	126119	409170	2.08212e+06	700666	1.63756e+06	3.21443e+06	4.78752e+06	3.43168e+06	4.98279e+06	5.23029e+06
91	395.315	131.045	4.4677e+06	2.72945e+06	2.56856e+06	4.59889e+06	5.88525e+06	1.81269e+06	3.27616e+06	3.90913e+06	2.62188e+07	1.1238e+08	2.12433e+06	3.88059e+06	2.5436e+06	2.78905e+06	3.36469e+06	2.28999e+07	1.52357e+06	2.54873e+06	3.09144e+06	2.43824e+06	7.49017e+06	7.63256e+06	7.78648e+06
92	27.9126	325.184	3.51467e+09	3.47441e+09	3.46098e+09	3.26021e+09	2.47064e+09	3.54045e+09	3.22877e+09	2.7675e+09	1.88094e+09	2.45796e+09	1.56504e+09	4.8403e+08	6.40627e+08	1.39202e+09	2.19688e+09	1.62852e+09	2.27675e+09	1.82827e+09	7.3846e+08	8.56647e+08	2.49072e+09	2.47198e+09	2.55581e+09
93	186.662	399.322	0	0	0	0	0	0	0	0	0	0	2.72294e+06	0	0	0	1.75683e+06	1.82333e+06	2.71301e+06	4.29878e+06	0	0	391157	632958	611008
94	173.911	117.054	1.09527e+09	4.60465e+07	1.98997e+08	9.72053e+08	6.09295e+07	2.50383e+08	1.45865e+09	1.11979e+08	5.82963e+07	8.98501e+07	6.50407e+08	1.74259e+07	2.5062e+07	3.75484e+07	1.42973e+07	6.76341e+08	1.54916e+07	5.2089e+07	6.41717e+07	1.63773e+07	3.26739e+08	3.86646e+08	3.32865e+08
95	525.381	173.104	2.04691e+06	175300	352934	181564	4.05019e+06	194728	407978	273027	6.68393e+06	3.88043e+07	316389	1.41724e+07	821847	356441	311943	5.0427e+06	208118	1.27952e+06	1.26421e+06	385729	3.59354e+06	4.06034e+06	3.6466e+06
96	27.9167	161.986	9.78289e+06	0	0	0	0	0	2.05751e+07	7.01957e+07	0	3.88294e+06	1.77937e+06	3.72995e+06	986357	0	392910	0	1.94682e+08	843829	1.43078e+07	3.26569e+06	1.41481e+07	1.67881e+07	1.70064e+07
97	378.981	165.018	6.54869e+06	7.83894e+06	5.75758e+06	6.88085e+06	5.62559e+06	7.42463e+06	7.29088e+06	5.95388e+06	1.31327e+07	1.19015e+07	6.59677e+06	5.98373e+06	7.16106e+06	7.34843e+06	7.84318e+06	5.54961e+06	7.8692e+06	6.66095e+06	6.31996e+06	6.60475e+06	5.51494e+06	6.29107e+06	6.02366e+06
98	246.045	179.055	1.07209e+07	8.51994e+06	1.75731e+07	9.65098e+06	9.42147e+07	2.48271e+07	4.55992e+07	3.52004e+07	1.4594e+08	1.33101e+08	2.64344e+07	7.70947e+07	3.21471e+07	1.79062e+07	1.22919e+07	5.38245e+07	2.4155e+07	3.62318e+07	2.84875e+07	1.65632e+07	3.41675e+07	4.84902e+07	3.75568e+07
99	70.8106	153.018	5.30863e+08	1.70118e+08	9.22823e+08	1.20133e+08	1.0651e+08	2.25316e+08	1.29994e+08	5.53376e+08	1.61941e+08	2.87156e+08	2.77858e+06	1.92886e+07	9.24145e+06	8.56673e+06	1.04606e+08	1.37531e+07	2.80159e+07	1.65059e+07	3.68253e+07	2.02282e+07	2.45681e+08	2.50011e+08	2.59822e+08
100	204.442	163.039	3.3998e+07	7.53738e+07	7.68411e+07	5.18895e+07	4.20302e+07	2.8431e+07	4.38104e+07	3.67452e+07	6.81317e+07	5.63667e+07	1.48532e+06	3.01929e+06	1.16863e+06	1.9024e+06	779368	2.41015e+06	526415	210766	2.00211e+06	1.57791e+06	3.1414e+07	3.29357e+07	3.61098e+07
101	195.583	137.023	4.32649e+08	1.73339e+08	1.0607e+08	7.71272e+07	6.41281e+07	2.14663e+08	1.2965e+08	2.00003e+08	8.2174e+07	3.19726e+07	1.57821e+07	3.77271e+07	1.48661e+07	1.77003e+07	3.36507e+07	2.19804e+07	1.61619e+07	2.1471e+07	6.92657e+07	1.73026e+07	1.05769e+08	1.04803e+08	1.07931e+08
102	124.112	165.055	1.77831e+09	9.82445e+07	7.51948e+08	1.5654e+09	2.15559e+09	2.65293e+09	4.27382e+09	7.79357e+08	1.93367e+09	5.59417e+09	1.11577e+09	1.01584e+09	5.45011e+08	2.1049e+08	1.38539e+08	2.58519e+09	4.87081e+08	5.04254e+08	5.17075e+08	2.26982e+08	1.57591e+09	1.63153e+09	1.57004e+09
103	284.156	282.084	2.51621e+06	1.75399e+06	1.59291e+06	489746	1.15602e+07	1.41865e+06	133050	2.53828e+06	3.37059e+06	3.62718e+06	725276	1.48284e+06	1.6659e+06	1.68779e+06	2.27317e+06	1.65825e+06	1.77177e+06	1.08711e+07	1.32353e+07	1.04241e+07	3.69463e+06	3.66193e+06	3.43931e+06
104	310.322	213.123	6.01582e+06	618447	1.55964e+06	5.27252e+06	5.29312e+06	797879	3.40857e+06	3.51447e+06	1.10684e+07	2.73096e+07	441134	5.96263e+06	214559	49981.8	104221	1.27979e+07	1.34143e+06	6.13114e+06	1.17109e+06	321853	6.85853e+06	5.57417e+06	5.32234e+06
105	181.285	204.066	2.31437e+08	1.74253e+06	1.19124e+07	1.89442e+07	8.15815e+07	2.07883e+07	1.31388e+08	3.18965e+07	4.78887e+07	7.85227e+07	1.80951e+07	1.84718e+07	7.99992e+06	7.60915e+06	3.45374e+06	1.99163e+07	7.95937e+06	9.01304e+06	9.01124e+06	2.15414e+06	5.30651e+07	5.49669e+07	5.04699e+07
106	50.545	339.326	8.40754e+06	5.73479e+06	1.13287e+07	1.85031e+07	5.20673e+06	1.5144e+07	6.48925e+06	9.67632e+06	6.58444e+06	5.86128e+06	4.88349e+07	3.44525e+07	5.85517e+07	3.78088e+07	4.07888e+07	5.10301e+07	4.52427e+07	5.52586e+07	4.17306e+07	3.80023e+07	1.17123e+07	1.08519e+07	1.0774e+07
107	344.143	211.082	1.21063e+07	224431	1.48176e+06	293078	543614	994905	1.57819e+06	587040	171654	338496	2.42335e+06	3.23619e+06	1.91551e+06	739732	4.57646e+06	3.8053e+06	682185	2.67724e+06	3.3841e+06	742513	2.04332e+06	1.78579e+06	2.71003e+06
108	262.117	243.061	1.10038e+07	2.52953e+06	8.08165e+06	2.56705e+06	1.36998e+07	6.20173e+06	1.6701e+07	8.77606e+06	6.14167e+06	1.07811e+07	2.28628e+06	6.55828e+06	2.75358e+06	878030	1.19151e+06	6.8486e+06	2.60496e+06	2.02265e+06	5.77323e+06	6.73055e+06	7.12713e+06	7.41931e+06	6.40444e+06
109	233.39	181.049	7.87876e+06	6.40192e+06	6.63469e+06	8.78086e+06	1.29103e+07	5.50768e+06	7.60208e+06	2.67801e+06	1.78822e+07	2.30533e+07	1.36057e+06	1.37058e+06	1.25615e+06	1.90209e+06	1.3044e+06	1.34273e+06	1.41513e+06	1.13345e+06	1.3915e+06	2.09176e+06	4.11649e+06	4.06121e+06	4.39305e+06
110	344.409	145.05	1.48975e+06	613499	854705	201236	161119	951639	438099	773895	57273.8	0	1.96983e+06	2.32353e+06	1.25759e+06	854243	951934	2.88775e+06	936627	1.2614e+06	3.13375e+06	1.37998e+06	1.1873e+06	919399	1.13603e+06
111	176.312	159.029	2.33054e+07	2.66963e+07	2.89757e+07	9.90046e+06	1.24265e+07	1.80124e+07	1.04562e+07	1.30123e+07	1.62464e+07	5.54005e+06	0	0	229244	0	0	0	0	0	0	0	2.15242e+06	2.02435e+06	1.39538e+06
112	308.337	229.144	318592	647865	902735	952175	388347	1.25695e+06	435493	1.16417e+06	100492	126849	1.31554e+06	1.48492e+06	1.00154e+06	938571	681146	830846	662704	1.00593e+06	1.77852e+06	687055	894243	867580	740326
113	219.406	190.054	4.25071e+06	3.20445e+06	3.02212e+06	8.78381e+06	2.29354e+06	307109	1.13152e+07	1.54872e+07	2.12944e+07	868576	6.65215e+06	304799	1.55388e+06	0	1.42952e+06	7.6087e+07	1.05886e+06	9.59088e+06	5.87522e+06	1.26637e+06	8.62849e+06	8.71308e+06	8.47292e+06
114	279.668	164.071	1.31973e+08	1.54062e+07	7.55748e+07	8.34456e+07	4.03927e+08	3.54842e+07	1.15067e+08	9.28883e+07	4.80099e+08	9.59023e+08	5.41272e+07	3.13086e+08	4.35291e+07	1.25879e+07	2.00399e+07	4.77343e+08	5.67644e+07	3.22342e+08	1.17984e+08	3.84499e+07	2.32955e+08	2.39898e+08	2.44173e+08
115	235.118	267.073	1.14955e+07	2.29883e+07	3.42248e+06	2.18652e+06	6.61998e+07	6.81532e+06	5.66691e+06	1.16204e+07	3.34846e+07	1.0107e+07	733553	2.07726e+06	1.27315e+07	2.28627e+06	8.23792e+06	5.47562e+06	1.53352e+07	1.02075e+08	5.91162e+07	5.19458e+07	2.38081e+07	2.30283e+07	2.13019e+07
116	201.57	206.082	3.01184e+06	0	715985	3.00571e+06	784269	2.37361e+06	6.81634e+06	1.16445e+06	3.8083e+06	3.83025e+06	1.21246e+06	2.54415e+06	706290	283513	624404	2.30919e+06	2.34445e+06	1.35221e+06	2.32457e+06	984805	2.40658e+06	2.18542e+06	2.06086e+06
117	391.708	145.061	5.57319e+07	1.86678e+07	5.53091e+07	2.1846e+07	1.10557e+08	5.91156e+06	1.85391e+07	5.9487e+07	1.28181e+08	2.05859e+08	8.27147e+06	6.75272e+07	7.76636e+06	760279	307321	1.65103e+08	4.3095e+06	2.76349e+07	2.67372e+07	1.44761e+07	6.82365e+07	6.34907e+07	6.31356e+07
118	367.205	130.061	9.7816e+06	3.93843e+06	5.06738e+06	4.31435e+06	1.04843e+07	3.66664e+06	6.5122e+06	8.36379e+06	1.17171e+07	1.37825e+07	3.22585e+06	5.23738e+06	2.50682e+06	1.41599e+06	2.50403e+06	6.19143e+06	3.35442e+06	7.59717e+06	3.27283e+06	1.39431e+06	6.01635e+06	6.88811e+06	5.95022e+06
119	214.517	172.097	1.46055e+07	3.30007e+06	2.06509e+06	4.54763e+06	3.02558e+06	8.13325e+06	1.74211e+07	6.97846e+06	5.87595e+06	6.33078e+06	2.92008e+06	4.91499e+06	1.58815e+06	1.3611e+06	972519	3.81566e+06	3.81364e+06	2.86564e+06	4.90839e+06	2.02938e+06	5.21441e+06	5.05544e+06	5.29887e+06
120	275.139	149.044	8.83422e+06	1.05941e+07	2.18447e+07	2.51845e+07	2.49616e+07	1.02189e+07	1.54395e+07	2.14734e+07	2.24924e+07	1.74199e+07	7.75984e+06	7.15485e+06	9.46315e+06	1.13596e+07	2.01433e+07	1.24254e+07	8.75635e+06	8.38846e+06	2.21465e+07	1.05871e+07	1.825e+07	2.13784e+07	1.65698e+07
121	284.05	547.146	905359	1.22826e+06	2.87633e+06	802080	835595	1.07927e+06	979362	1.04768e+06	490859	640511	0	0	0	18281.3	0	0	0	0	0	0	737280	825613	640127
122	371.684	118.05	1.45738e+07	5.19168e+06	2.07238e+07	8.78863e+06	4.79925e+07	3.88115e+06	1.30551e+07	2.8924e+07	1.2629e+08	9.29197e+07	2.8881e+06	2.66255e+07	4.4741e+06	272107	505637	8.22654e+07	1.76937e+06	1.93088e+07	1.20173e+07	2.08665e+06	3.80621e+07	3.97393e+07	3.42727e+07
123	87.3648	289.071	2.91635e+06	0	0	0	0	0	0	0	0	0	1.29075e+08	1.71601e+08	4.9239e+07	2.65776e+08	5.25874e+08	1.02668e+08	5.21151e+07	5.70738e+07	5.12611e+07	9.55765e+07	5.93837e+07	6.35707e+07	6.51113e+07
124	279.503	191.019	1.88157e+08	3.18657e+08	4.62062e+08	7.66072e+08	2.38733e+08	1.48094e+08	2.05977e+08	3.85494e+08	1.96811e+08	3.18016e+08	50290.3	0	177949	116860	99253.9	0	63613	881999	645074	339137	1.55997e+08	1.56217e+08	1.90248e+08
125	202.181	157.036	3.03365e+08	6.42184e+07	8.84623e+07	3.39909e+07	2.55071e+07	3.61122e+07	1.83018e+08	7.22335e+07	1.1706e+08	2.03e+08	1.09932e+07	1.52962e+06	3.34278e+06	1.03788e+06	4.21344e+06	7.57665e+06	4.12822e+06	4.05023e+06	9.09215e+06	2.87279e+06	8.04158e+07	7.38369e+07	6.93803e+07
126	307.648	173.081	252170	813823	4.04131e+06	6.94763e+06	1.42208e+07	403191	7.81562e+06	4.37092e+06	4.35304e+07	7.28502e+07	1.14132e+06	2.56226e+07	774899	780680	905442	3.04081e+07	2.62397e+06	715173	814871	1.25582e+06	176157	1.47865e+07	1.41583e+07
127	130.677	201.112	0	0	1.15974e+06	1.00733e+06	444058	1.37265e+06	400941	2.00792e+06	146546	179174	1.96667e+07	3.77374e+07	2.33351e+07	2.84505e+07	2.85693e+07	2.27757e+07	2.00782e+07	2.04905e+07	5.45444e+07	1.91534e+07	1.13047e+07	1.16696e+07	1.15489e+07
128	184.748	167.034	3.2779e+07	5.75551e+06	1.30159e+07	4.60212e+06	1.23477e+07	1.1657e+07	1.35207e+07	4.87507e+06	8.44833e+06	1.12308e+07	1.12675e+07	9.69327e+06	6.79152e+06	1.10455e+07	1.14724e+07	8.42693e+06	9.27396e+06	9.52994e+06	1.04519e+07	7.79682e+06	1.36334e+07	1.03001e+07	1.56546e+07
129	413.687	174.04	1.53038e+07	2.75587e+06	9.33248e+06	5.71813e+07	9.37615e+06	2.75202e+06	1.06252e+07	1.10956e+07	1.31551e+07	1.74416e+07	4.44456e+06	1.33615e+07	1.80689e+06	257458	179265	4.14094e+07	822163	2.42733e+06	1.92029e+06	435554	1.13685e+07	1.27824e+07	1.16539e+07
130	66.2814	157.049	3.29117e+07	9.86863e+06	1.78515e+07	7.45361e+06	1.14141e+07	9.09047e+08	1.35611e+07	1.05452e+07	4.53662e+06	1.00258e+07	2.54608e+07	3.21461e+07	1.65918e+07	1.48325e+06	1.50356e+07	3.26785e+07	7.27968e+06	2.34888e+07	2.09736e+07	1.54007e+07	6.68157e+07	6.35662e+07	6.13308e+07
131	69.9977	111.007	1.2164e+07	1.78381e+07	1.45131e+07	1.09467e+07	8.96054e+06	6.34027e+06	6.75661e+06	1.09848e+07	1.51306e+07	4.25258e+06	2.4543e+06	3.70465e+06	1.66619e+06	982088	3.07792e+06	8.34092e+06	2.71524e+06	3.1679e+06	4.80625e+06	6.78205e+06	4.74595e+06	5.05733e+06	6.02489e+06
132	266.994	195.065	2.01327e+06	1.9633e+06	2.95297e+06	1.02631e+06	907923	1.38951e+06	2.1004e+06	1.01549e+06	373647	1.33878e+06	209697	114597	232765	384358	171246	156444	197825	327087	332568	245244	1.15997e+06	1.10892e+06	1.4759e+06
133	469.664	341.109	734519	892106	1.30856e+07	3.15698e+06	3.85806e+06	801665	313258	3.74296e+06	3.34976e+06	2.6051e+06	1.29141e+06	7.85593e+06	1.63009e+06	457479	213842	7.72977e+06	147459	436925	3.56495e+06	4.02375e+06	4.11904e+06	4.25183e+06	4.02706e+06
134	381.783	197.045	1.88848e+06	1.57567e+06	2.30934e+06	653677	862185	1.43369e+06	1.28695e+06	1.21775e+06	1.85947e+06	1.3607e+06	172895	68547.3	111302	181185	187990	65183.5	136969	154557	105542	111174	902043	1.06941e+06	1.05834e+06
135	69.0779	313.238	6.07379e+06	1.09185e+07	7.61857e+06	1.41123e+07	8.84789e+06	2.2065e+07	1.48807e+07	2.42367e+07	2.3701e+06	2.69534e+06	1.80786e+07	2.82549e+07	2.85672e+07	2.74468e+07	2.74135e+07	1.55515e+07	2.12464e+07	1.17518e+07	3.54051e+07	2.91553e+07	1.49813e+07	1.40943e+07	1.51046e+07
136	25.8116	465.304	5.15512e+09	2.80329e+09	4.59865e+09	4.09003e+09	4.72405e+09	5.01952e+09	6.07244e+09	6.84267e+09	9.62176e+09	5.20922e+09	6.56826e+09	8.73433e+09	4.03433e+09	2.16083e+09	2.07451e+09	6.3801e+09	4.12116e+09	4.95732e+09	6.44728e+09	6.23335e+09	5.86197e+09	5.76659e+09	6.40059e+09
137	47.3098	182.053	1.82385e+07	2.54632e+06	8.08908e+06	3.56508e+06	3.54816e+06	1.07545e+07	681997	3.87773e+06	2.0628e+06	8.78926e+06	1.12202e+06	1.52495e+06	6.38134e+06	1.63394e+06	5.31777e+06	3.17625e+06	8.48412e+06	856392	4.2514e+06	1.21194e+07	6.11034e+06	5.70985e+06	6.1486e+06
138	149.926	181.049	2.8343e+07	1.22598e+07	2.1504e+07	1.46381e+07	1.25511e+07	8.27428e+06	1.73645e+07	1.01097e+07	1.1593e+07	6.13043e+06	2.42713e+06	1.17459e+06	683791	4.60669e+06	3.12834e+06	2.0202e+06	2.92855e+06	1.44933e+06	2.85496e+06	4.88487e+06	1.07209e+07	1.08021e+07	1.07949e+07
139	293.054	218.103	1.29583e+08	3.59565e+06	1.27758e+07	9.64322e+06	1.02584e+07	2.10575e+07	3.15171e+07	6.59796e+06	9.65086e+06	1.59263e+07	5.74401e+06	7.20114e+06	3.97284e+06	1.34153e+06	606730	1.55832e+07	2.23464e+06	3.06381e+06	7.14912e+06	2.22781e+06	2.11522e+07	1.93451e+07	2.09459e+07
140	78.4817	215.165	173707	8.37318e+06	1.25755e+06	2.4642e+06	1.04038e+06	2.79874e+06	778143	3.13887e+06	739965	568630	0	577682	1.31687e+06	425529	461602	0	917920	285079	526831	2.5322e+06	1.48924e+06	1.64946e+06	904927
141	446.492	503.162	551497	140373	5.18315e+06	3.84657e+06	4.35229e+06	2.3493e+06	889233	2.91811e+06	2.59224e+06	2.63845e+06	12598.6	2.96054e+06	385983	80500.9	49051.5	2.58435e+06	51581.9	124173	857820	208152	2.32468e+06	3.81167e+06	2.39304e+06
142	229.513	193.05	3.47061e+06	1.65476e+06	1.02405e+06	1.01059e+06	841665	726253	1.03207e+06	619662	717803	1.01137e+06	108124	306381	265073	385252	329950	312235	149120	178783	340953	681496	648120	642479	796632
143	279.022	173.092	692475	0	2.41247e+06	1.95109e+06	1.93954e+07	340324	6.39744e+06	4.72548e+06	6.04885e+07	6.39718e+07	1.16017e+06	4.81338e+07	1.53171e+06	1.26247e+06	1.1715e+06	5.5329e+07	2.68044e+06	1.10438e+07	2.88036e+06	1.53597e+06	2.04611e+07	1.71972e+07	1.78116e+07
144	85.867	187.097	584826	1.31538e+06	1.54202e+06	1.00429e+06	991718	2.0678e+06	1.78506e+06	1.97872e+06	0	0	5.136e+07	4.94796e+07	4.0873e+07	4.06502e+07	4.36001e+07	4.05764e+07	2.34744e+07	3.812e+07	5.11962e+07	2.32143e+07	1.72713e+07	1.7679e+07	1.82566e+07
145	308.382	181.071	6.56513e+07	4.35638e+06	9.23414e+06	3.80518e+06	7.69814e+06	9.35508e+07	1.21518e+07	1.53296e+07	4.28425e+07	2.53606e+06	9.97827e+06	2.45704e+07	3.69799e+07	3.30033e+07	4.66085e+07	3.88105e+07	1.60886e+07	2.06021e+07	9.14661e+07	2.06983e+07	3.25719e+07	3.21802e+07	3.1549e+07
146	36.5755	151.039	3.89709e+07	3.1571e+07	7.80997e+07	3.97021e+07	4.69135e+07	2.92151e+07	4.07396e+07	3.31159e+07	4.37152e+07	3.54821e+07	4.51919e+07	5.54503e+07	7.2445e+07	1.19122e+08	6.6791e+07	5.11832e+07	9.77693e+07	5.78996e+07	7.23166e+07	7.75039e+07	5.00583e+07	5.40334e+07	5.52273e+07
147	343.542	209.066	418584	313096	675858	428124	244403	267926	205539	169238	518162	251430	513310	1.39884e+06	243737	19106.5	281848	1.57955e+06	43413.6	665001	811819	380445	679644	745454	635475
148	172.54	181.071	0	1.86314e+07	2.31423e+07	1.02178e+07	1.51558e+07	2.51243e+08	1.06394e+07	3.03849e+08	2.20394e+06	4.47097e+07	3.37655e+06	1.91353e+06	2.23235e+06	2.45848e+06	1.19383e+06	3.02995e+07	872728	2.9349e+06	3.38158e+06	4.30448e+06	4.50352e+07	4.43527e+07	4.44325e+07
149	55.0301	101.023	1.95433e+07	3.48848e+07	4.89631e+07	3.86548e+07	4.1464e+07	2.08475e+07	3.30306e+07	1.98101e+07	6.3164e+07	3.62145e+07	3.447e+07	2.44098e+07	2.8257e+07	3.13409e+07	2.71276e+07	2.72571e+07	1.97285e+07	2.66196e+07	2.86475e+07	3.14308e+07	3.0361e+07	2.87145e+07	3.51827e+07
150	55.0838	152.034	3.50976e+06	6.32544e+06	4.52821e+06	4.2511e+06	3.11917e+06	1.1087e+06	5.02102e+06	3.6188e+06	6.67557e+06	3.82572e+06	1.53902e+07	8.07085e+06	1.23094e+07	1.15127e+07	2.02498e+07	8.77289e+06	1.78797e+07	8.16115e+06	6.76727e+06	2.02245e+07	3.19951e+06	3.60378e+06	3.25926e+06
151	407.397	188.056	3.41053e+06	1.19113e+06	1.74981e+06	4.8181e+06	3.4932e+06	8.46977e+06	9.53054e+06	4.54187e+06	4.17453e+06	3.78045e+06	5.87834e+06	543711	330273	123818	159645	9.51586e+06	549715	1.08544e+06	864538	157515	3.53082e+06	3.4379e+06	3.08897e+06
152	247.793	263.104	2.38794e+06	347286	5.10707e+06	480115	2.15188e+07	3.40175e+06	675058	1.98677e+06	831767	3.96895e+06	165344	252931	0	498615	95943.8	907752	433203	8.06984e+06	3.51361e+06	3.64866e+06	3.81647e+06	3.7174e+06	2.6574e+06
153	279.679	147.029	1.3301e+07	2.7293e+07	3.75847e+07	5.73068e+07	1.06867e+07	1.15681e+07	1.44034e+07	3.17051e+07	1.61038e+07	2.55538e+07	1.61645e+06	984038	1.6155e+06	833342	1.15492e+06	1.48607e+07	392883	909023	4.27992e+06	1.10778e+06	1.17551e+07	1.01367e+07	1.31954e+07
154	388.142	175.024	476045	2.30211e+06	1.04469e+06	352892	5.78254e+06	3.22932e+06	588547	1.39022e+06	5.14105e+06	2.01419e+07	41880.9	833810	261567	435106	835904	0	467480	129925	81924.1	431611	1.93512e+06	2.43913e+06	1.69936e+06
155	195.059	251.078	4.86741e+06	2.25696e+07	1.23273e+07	1.17974e+07	1.75583e+06	3.19096e+06	1.28164e+07	6.76664e+06	1.64066e+06	6.51418e+06	1.47713e+06	2.07644e+06	350534	239437	1.26709e+06	1.71311e+07	336022	487048	2.52541e+06	1.31128e+06	6.89739e+06	6.25502e+06	7.18194e+06
156	29.1663	153.022	9.27903e+06	1.16096e+07	1.67998e+07	1.52015e+07	1.59473e+07	1.14469e+07	2.16465e+07	1.21638e+07	2.43031e+07	2.03261e+07	2.11044e+06	5.94552e+06	3.65992e+06	2.58742e+06	4.41496e+06	2.24045e+06	4.27816e+06	2.52845e+06	7.35406e+06	3.41947e+06	1.37675e+07	1.03705e+07	1.23771e+07
157	262.574	261.124	6.50206e+06	957752	1.56006e+06	9.33721e+06	7.92285e+06	344611	3.40126e+06	1.94056e+06	1.16615e+07	4.26443e+07	630831	9.35541e+06	353712	429153	511875	1.41902e+07	1.6081e+06	8.15378e+06	855442	554505	6.50382e+06	7.24516e+06	6.35618e+06
158	197.853	131.07	1.68054e+07	345080	2.38903e+06	7.20222e+06	1.26695e+06	2.7516e+06	1.45488e+07	743440	1.03707e+06	5.13428e+06	1.45874e+07	1.99712e+07	9.85961e+06	1.60743e+07	8.97551e+06	1.86806e+07	5.31964e+06	1.20097e+07	2.01212e+07	8.8344e+06	9.87886e+06	1.03986e+07	1.08676e+07
159	375.752	159.065	0	0	0	0	0	78588.3	0	0	0	0	8.56462e+06	1.50907e+07	3.96495e+06	3.37513e+06	3.84435e+06	1.58553e+07	3.87991e+06	8.79846e+06	1.1332e+07	3.96242e+06	3.72033e+06	3.5e+06	3.55155e+06
160	250.525	151.06	4.57494e+09	1.42661e+07	3.32666e+07	1.94459e+07	1.48951e+06	8.91458e+07	8.69168e+08	1.07153e+07	229945	821206	2.94159e+06	0	2.57786e+06	5.15754e+06	8.08734e+06	1.47806e+06	4.08599e+06	4.37144e+06	6.63061e+06	5.22923e+06	3.36733e+08	3.06685e+08	3.50603e+08
161	37.3675	135.044	8.37584e+07	1.90815e+07	5.30216e+07	2.96029e+07	1.60978e+07	5.00984e+07	3.78165e+07	2.07715e+07	1.96358e+07	1.7497e+07	5.88155e+06	6.38321e+06	7.9886e+06	7.8242e+06	6.01122e+06	9.11794e+06	6.2445e+06	8.25954e+06	9.68463e+06	8.76718e+06	3.96407e+07	2.57505e+07	2.5065e+07
162	440.607	632.204	0	65185.2	670682	425874	599128	113032	0	1.02896e+06	279613	0	368898	1.8772e+06	1.87051e+06	134789	74827.2	1.08035e+06	960108	344048	1.62332e+06	926403	690620	673936	653886
163	192.324	491.119	0	366797	5.76319e+06	0	0	224503	287508	1.04823e+06	148386	1.11578e+06	0	0	0	0	0	0	0	0	0	0	718532	659845	803771
164	147.44	579.172	3.74924e+06	1.0919e+07	7.93214e+06	3.09756e+06	1.74806e+07	7.87894e+06	8.79329e+06	1.03159e+07	570090	1.05426e+07	6.77569e+07	7.76416e+06	9.62202e+06	3.9953e+07	7.95096e+07	2.62503e+07	2.92035e+07	1.08755e+07	2.23038e+07	4.68691e+07	1.4086e+07	1.13942e+07	1.67017e+07
165	140.049	421.163	1.67415e+06	206239	3.05709e+06	75432.4	492090	136696	1.48883e+06	939927	1.06761e+06	2.79672e+06	1.35423e+06	2.62358e+06	2.22461e+06	4.22866e+06	7.23822e+06	3.76496e+06	2.67975e+06	3.34565e+06	6.33897e+06	3.48639e+06	1.75006e+06	1.74834e+06	2.34024e+06
166	488.917	173.008	3.787e+06	8.92818e+06	1.2233e+07	4.86676e+06	1.83636e+06	5.60155e+06	3.88134e+06	2.90272e+06	1.08786e+07	1.59471e+06	3.0494e+06	1.58625e+06	2.82948e+06	2.9601e+06	2.54171e+06	3.94772e+06	3.02097e+06	2.60749e+06	2.80848e+06	2.70336e+06	2.10121e+06	5.43558e+06	2.19257e+06
167	223.94	431.098	590222	194787	854447	102574	154615	312665	211784	191549	244659	300606	0	0	0	0	0	0	0	0	0	0	192409	292873	159660
168	23.4033	229.088	1.06145e+07	1.76949e+06	3.75342e+07	6.44587e+06	5.97772e+06	1.41358e+07	1.16103e+08	5.11142e+06	1.16731e+06	1.35675e+07	4.30476e+07	7.74166e+06	6.87298e+06	3.03002e+06	959946	1.42198e+07	4.11135e+06	1.52921e+07	8.64507e+06	910584	8.86061e+06	9.99365e+06	9.69743e+06
169	168.8	223.061	2.1884e+07	4.35018e+06	1.25096e+07	2.74625e+06	9.79551e+06	1.07109e+07	817637	1.45885e+07	2.96366e+06	2.87763e+07	433074	1.42651e+06	1.32618e+06	856347	1.27771e+06	579938	960392	611666	745762	5.30307e+06	8.99657e+06	8.03779e+06	8.9614e+06
170	72.5973	115.075	0	0	9.19394e+07	0	3.84335e+07	0	0	4.7793e+07	1.41494e+07	3.67373e+06	1.60328e+09	1.52299e+08	1.36603e+08	5.37194e+08	3.65561e+08	8.00191e+08	9.65417e+08	7.28848e+08	1.27586e+09	5.65694e+08	2.32089e+08	2.35164e+08	1.76851e+08
171	219.179	296.1	4.82423e+06	242681	526262	229168	848901	105062	918485	577535	1.92535e+06	1.20551e+06	31649.8	2.52836e+06	665230	0	57592.3	1.78197e+06	0	232841	522196	414566	866582	948753	912575
172	134.466	137.034	7.04738e+06	4.16384e+06	1.04708e+07	6.17133e+06	5.70491e+06	6.64506e+06	6.6409e+06	8.7169e+06	6.89736e+06	4.28445e+06	1.2155e+07	1.85759e+07	1.18654e+07	1.33699e+07	2.52938e+07	1.53888e+07	8.89671e+06	1.38665e+07	1.87357e+07	1.35582e+07	1.18172e+07	1.16808e+07	1.23808e+07
173	397.031	209.066	738646	189967	745004	432585	398867	88855.1	948469	204358	1.94784e+06	1.62187e+06	0	0	0	0	0	20443.2	0	0	0	0	541681	312954	518156
174	93.0464	243.196	2.37741e+06	3.19102e+06	2.19503e+06	3.74378e+06	1.76046e+06	9.96867e+06	7.26915e+06	4.7884e+06	3.09211e+06	1.14607e+06	0	275900	187018	1.10554e+06	879830	0	653780	0	303081	632158	835155	1.58087e+06	2.9581e+06
175	405.618	117.018	1.28755e+08	8.8413e+07	4.10937e+08	6.10174e+08	3.14122e+08	4.52898e+08	3.8198e+08	2.43523e+08	7.46863e+08	1.91352e+09	3.10311e+08	1.38349e+09	2.93125e+08	1.01742e+08	1.30502e+08	3.07368e+08	2.73512e+08	1.99693e+08	2.58463e+08	1.12604e+08	5.76536e+08	5.79775e+08	5.73143e+08
176	209.065	447.126	588789	209413	2.34911e+06	602192	359004	316828	756507	314358	244673	1.24816e+06	0	0	0	0	63279.5	0	0	0	0	0	638886	578016	789232
177	312.157	157.024	693306	973213	658574	1.10768e+06	224703	1.06301e+06	505587	1.66664e+06	1.58494e+06	1.96373e+06	376777	1.03979e+06	0	0	0	4.80426e+06	233490	0	0	0	1.0977e+06	957339	762981
178	200.553	152.001	3.36583e+07	3.2499e+06	7.82196e+06	1.20791e+07	1.30394e+07	1.04576e+07	1.51956e+07	2.7048e+07	1.1438e+07	3.02288e+06	1.99017e+07	5.17505e+06	2.58038e+07	7.57129e+06	8.67128e+06	5.10325e+06	3.69328e+07	8.53124e+06	3.24486e+06	2.35643e+06	1.45367e+07	1.39184e+07	1.35578e+07
179	121.35	173.044	436458	2.26114e+06	2.46649e+07	5.39677e+06	2.19739e+07	2.80186e+06	919198	1.11804e+07	1.65768e+07	1.59938e+06	1.01327e+07	5.8285e+06	1.35921e+06	0	7.35084e+06	1.03326e+07	7.70955e+06	3.4285e+07	3.09947e+07	6.76378e+06	9.40553e+06	9.32411e+06	1.06718e+07
180	78.5765	121.028	2.71109e+07	1.34734e+07	1.63076e+07	1.60768e+07	2.1783e+07	1.60439e+07	1.58498e+07	1.25376e+07	1.45253e+07	1.61222e+07	1.79175e+06	3.82728e+06	2.69015e+06	2.22829e+06	1.99894e+06	4.32747e+06	8.02568e+06	4.11603e+06	3.18441e+06	6.743e+06	1.06577e+07	4.9757e+06	1.07443e+07
181	155.204	152.082	0	0	0	8.11321e+07	417412	0	3.1399e+07	0	0	0	1.90602e+07	0	0	0	0	0	0	0	0	0	5.71632e+06	5.12383e+06	5.75958e+06
182	336.229	196.072	2.07924e+06	34650.5	41778.8	143878	365631	77656	496820	23734.7	302510	313785	163966	200876	100974	55352.2	28728.3	474639	129291	223527	378759	208994	326908	302129	199744
183	35.7836	177.055	2.0758e+06	1.06223e+07	2.31963e+07	6.69408e+06	1.43053e+07	1.62112e+07	8.12681e+06	2.8889e+06	5.21891e+06	6.86634e+06	1.30376e+07	2.2438e+07	2.52287e+07	3.2492e+07	2.78297e+07	1.93158e+07	2.62021e+07	1.86796e+07	2.24344e+07	1.76927e+07	1.22796e+07	1.69382e+07	1.58799e+07
184	36.6656	307.263	7.69575e+06	2.1164e+07	3.23488e+06	7.17213e+06	3.92673e+06	3.44774e+07	9.79974e+06	1.71315e+07	4.30225e+06	7.2325e+06	1.67373e+06	4.74694e+06	0	0	0	7.79934e+06	2.37684e+06	2.5841e+06	1.13406e+06	814408	8.99601e+06	1.08345e+07	5.46694e+06
185	181.59	549.16	852489	3.04241e+06	1.70979e+06	2.23969e+06	694403	866605	1.65797e+06	1.06884e+06	1.49424e+06	1.42736e+06	691854	270000	491971	150744	152064	613371	836804	92822.5	0	112949	524961	1.31663e+06	838419
186	37.3374	325.31	6.69814e+06	8.21689e+06	7.07349e+06	1.21435e+07	6.80136e+06	7.15891e+06	6.19711e+06	7.96219e+06	8.02543e+06	3.84717e+06	1.89833e+07	3.41835e+07	2.19016e+07	1.54592e+07	1.94706e+07	2.3747e+07	1.79763e+07	2.90522e+07	3.01785e+07	1.73646e+07	1.1976e+07	1.29504e+07	1.22235e+07
187	140.054	159.102	0	0	0	317408	293851	3.06157e+06	3.27601e+06	1.85549e+06	2.91119e+06	1.1694e+06	2.19348e+08	1.6218e+08	1.88443e+08	4.62943e+08	3.70385e+08	2.23612e+08	1.95781e+08	2.57369e+08	4.13237e+08	2.41297e+08	8.83759e+07	8.94273e+07	8.42678e+07
188	23.9864	215.072	1.45582e+07	0	1.56565e+07	4.53196e+06	0	6.64402e+06	9.50066e+07	920490	0	1.29804e+06	3.22153e+07	434087	700468	0	0	7.92912e+06	343634	1.82027e+06	1.57238e+06	0	6.17739e+06	5.98052e+06	7.09074e+06
189	219.299	478.293	1.8624e+06	5.44252e+06	4.21467e+06	5.54964e+06	2.03749e+07	3.86285e+06	3.36713e+07	3.03777e+07	7.19291e+07	2.80126e+07	1.12138e+06	6.11076e+07	1.3929e+07	0	524332	1.06886e+07	1.46514e+07	1.12744e+07	5.50211e+06	3.61741e+06	1.98902e+07	1.73125e+07	1.68125e+07
190	289.495	116.034	1.16049e+07	0	2.71996e+06	1.45865e+06	3.91211e+06	3.33366e+06	1.95196e+06	2.34753e+06	8.85149e+06	1.21687e+07	1.20189e+06	5.59578e+06	2.59406e+06	237703	0	6.61378e+06	2.26676e+06	4.09e+06	2.10291e+06	1.22739e+06	4.94896e+06	4.64609e+06	5.08009e+06
191	226.713	217.107	91044.1	0	0	0	0	0	0	0	0	30372.2	2.47826e+06	2.06032e+06	1.57705e+06	1.59585e+06	1.70373e+06	2.72569e+06	855954	1.8314e+06	1.66165e+06	2.11301e+06	799064	948106	486243
192	433.974	341.109	5.28182e+06	802613	2.48763e+07	1.34972e+07	4.31502e+06	4.04705e+06	3.7993e+06	4.42177e+06	2.65938e+06	5.07705e+06	2.33604e+06	1.76031e+06	1.09727e+06	1.64559e+06	1.43161e+06	4.53405e+06	255642	814612	3.45726e+06	1.2756e+06	5.82748e+06	5.75995e+06	5.6341e+06
193	406.237	193.035	1.36021e+06	1.24981e+06	1.27127e+06	476552	2.19258e+06	1.13412e+06	431429	786240	1.09237e+06	1.68746e+06	63269.5	614437	15952	156606	137606	568067	44781.7	311535	366060	49632.4	902774	859364	951581
194	148.934	609.181	4.43297e+06	2.71503e+06	2.56922e+06	3.0249e+06	8.68323e+06	2.45693e+06	6.75456e+06	4.63703e+06	2.48127e+06	7.78069e+06	59313.1	984038	0	0	42882.9	0	44312.6	892976	0	0	1.61813e+06	1.33653e+06	1.81376e+06
195	243.28	122.024	1.32981e+07	7.72132e+06	1.17311e+07	2.014e+07	9.51178e+06	3.50393e+06	1.20967e+07	2.94602e+06	262752	2.41244e+06	2.88822e+06	487168	894100	2.01996e+06	2.53708e+06	7.22615e+06	1.36437e+06	2.41195e+06	9.56395e+06	4.26556e+06	6.10912e+06	5.29672e+06	5.85968e+06
196	40.5917	269.069	666198	2.18103e+06	3.21624e+06	7.32998e+06	2.20927e+06	0	4.72753e+06	234848	1.01917e+07	1.75997e+06	1.00582e+06	1.84415e+06	1.08968e+06	1.87702e+06	1.19729e+06	1.70607e+06	1.8952e+06	974956	1.64834e+06	1.69725e+06	1.68198e+06	1.14355e+06	1.50129e+06
197	109.874	165.041	3.60644e+06	2.22034e+06	0	2.93832e+06	973827	0	1.61521e+06	5.77417e+06	3.38996e+06	1.30366e+06	0	2.25263e+06	225033	650560	0	0	0	2.88611e+06	4.57173e+06	1.40139e+07	2.07419e+06	2.30177e+06	2.01302e+06
198	378.029	593.15	217536	112794	691131	137481	261436	227875	199349	259901	321667	424877	0	0	0	0	0	0	0	0	0	0	214235	242449	143006
199	174.404	209.045	0	905545	1.13979e+06	476139	699357	607912	312658	782721	843287	1.46532e+06	519968	400505	1.0324e+06	632510	520960	323764	421755	548747	1.65008e+06	696386	567784	661097	583884
200	91.4471	593.188	2.46447e+06	2.13198e+06	57408.9	522596	1.17068e+06	1.98329e+06	1.61241e+06	736509	217374	1.76458e+06	0	0	0	0	0	0	0	0	0	0	60054.7	236653	299564
201	346.84	179.055	2.13016e+07	2.10045e+07	2.44568e+07	2.81131e+07	1.40689e+07	9.09745e+06	1.20513e+07	1.72198e+07	3.34297e+07	1.67029e+07	4.22884e+06	4.16185e+06	4.97655e+06	6.64154e+06	8.82459e+06	9.65635e+06	3.05036e+06	4.179e+06	1.07821e+07	5.03469e+06	1.64645e+07	1.39738e+07	1.59252e+07
202	316.29	227.128	519479	1.25637e+06	1.52464e+06	971824	740721	2.48275e+06	1.26858e+06	1.19644e+06	1.47994e+06	4.15331e+06	645433	996017	535918	718985	585499	1.84618e+06	461906	675359	1.03905e+06	401378	924491	866179	1.09797e+06
203	37.4237	309.279	2.70737e+07	3.27285e+07	8.80803e+06	1.30929e+07	1.20177e+07	2.90844e+07	2.47405e+07	3.29744e+07	1.92772e+07	1.34952e+07	7.91511e+06	1.38408e+07	7.09715e+06	8.11691e+06	9.45166e+06	1.61368e+07	9.57649e+06	8.8723e+06	9.917e+06	9.50062e+06	1.80202e+07	1.6824e+07	1.71894e+07
204	469.381	221.066	4.0416e+06	4.93633e+06	2.69556e+07	1.06764e+07	9.93175e+06	2.96803e+06	3.93736e+06	9.4971e+06	9.03203e+06	8.82739e+06	4.24998e+06	1.56612e+07	9.85358e+06	3.51544e+06	3.84407e+06	1.56124e+07	1.82537e+06	3.18215e+06	9.64874e+06	9.46669e+06	1.03227e+07	1.03055e+07	1.10659e+07
205	55.0393	181.049	1.40989e+08	5.8145e+07	8.94883e+07	7.42377e+07	5.58456e+07	1.03114e+08	9.90728e+07	4.75169e+07	5.91687e+07	2.7948e+07	1.52527e+07	1.67641e+07	2.02088e+07	2.46471e+07	1.98699e+07	1.33239e+07	2.13659e+07	1.77771e+07	1.82587e+07	2.74899e+07	3.70737e+07	4.90409e+07	4.63174e+07
206	97.1193	115.075	0	233304	2.70277e+06	0	463240	0	0	0	270891	0	1.68708e+08	1.67021e+07	1.7075e+07	6.02179e+07	4.08723e+07	8.72111e+07	1.08918e+08	8.04452e+07	1.30826e+08	1.35683e+07	1.56742e+07	1.277e+07	6.91508e+06
207	407.874	179.055	1.46656e+07	2.26751e+07	5.03501e+07	4.62256e+07	2.39226e+07	1.42365e+07	2.10754e+07	2.3477e+07	2.25295e+07	2.73498e+07	2.17292e+07	1.72019e+07	1.34951e+07	2.08061e+07	1.90162e+07	4.13113e+07	1.27918e+07	1.65355e+07	3.07455e+07	2.8032e+07	3.6868e+07	2.49141e+07	3.34075e+07
208	195.644	138.027	3.18292e+07	1.2397e+07	7.36391e+06	4.87665e+06	4.40878e+06	1.48701e+07	9.32482e+06	1.40513e+07	5.65321e+06	2.12462e+06	982650	1.77128e+06	326539	758797	1.79955e+06	749875	1.73727e+06	728357	1.70453e+06	1.80971e+06	7.23079e+06	6.96915e+06	7.31603e+06
209	82.1957	343.082	1.71458e+06	1.68719e+06	964585	961110	2.03385e+06	3.05051e+06	307026	981031	603324	557769	2.57177e+06	1.06696e+07	2.48415e+06	6.73989e+06	2.86711e+07	1.80046e+07	7.78615e+06	4.57211e+06	1.70125e+07	1.29873e+07	6.26456e+06	5.28225e+06	8.99165e+06
210	110.1	227.066	5.06081e+06	5.17669e+06	7.56023e+06	1.49428e+07	128696	1.92186e+06	3.4645e+06	4.03696e+06	856248	484531	2.18827e+06	2.1986e+06	1.35305e+06	1.55471e+06	1.99402e+06	4.67371e+07	1.06391e+06	1.01101e+06	1.4778e+06	1.28601e+06	4.10869e+06	4.44482e+06	4.66465e+06
211	32.0127	319.23	1.00139e+09	1.0388e+09	1.49863e+09	1.4314e+09	8.34932e+08	9.95831e+08	1.20403e+09	1.11006e+09	1.48991e+09	2.12001e+08	4.20711e+06	600962	343568	498881	4.15456e+06	1.40957e+06	6.81656e+06	3.59406e+06	1.57111e+06	708447	5.90097e+08	6.50694e+08	6.14623e+08
212	319.024	146.045	7.80255e+07	1.10232e+07	3.01071e+07	2.18569e+07	3.95797e+07	3.65143e+07	1.1374e+08	4.44079e+07	1.0761e+08	9.52188e+07	3.67339e+07	6.47831e+07	2.33477e+07	1.09966e+07	1.05189e+07	6.35045e+07	1.95809e+07	4.42406e+07	2.31445e+07	1.3239e+07	5.98518e+07	5.84772e+07	5.78204e+07
213	193.464	481.112	1.57297e+06	673326	3.11353e+06	789938	839316	862451	1.35092e+06	712075	1.2535e+06	1.4676e+06	175040	608152	126535	1.17798e+06	154252	1.72447e+06	2.30301e+06	62349.2	533859	152516	1.29501e+06	1.04816e+06	1.0212e+06
214	47.5774	141.018	829763	1.08043e+06	2.16147e+06	5.71978e+06	235739	2.48712e+06	1.68711e+06	1.86885e+06	592428	387878	2.79585e+06	3.04159e+06	2.62371e+06	1.21176e+06	1.29699e+06	2.29785e+06	1.54398e+06	2.89163e+06	1.68613e+06	4.60697e+06	1.48579e+06	830999	1.60889e+06
215	157.817	353.233	0	7.86819e+06	421883	5.29237e+06	352330	4.4391e+06	1.70092e+07	582634	0	99189.4	1.46352e+06	146115	119690	211059	295559	412307	196620	369630	292752	232527	1.14634e+06	842165	916584
216	353.62	149.045	9.91865e+06	1.89254e+06	2.86185e+06	3.96683e+06	3.3027e+06	6.47017e+06	6.70724e+06	5.17912e+06	6.25209e+06	3.60962e+06	1.48606e+06	3.45396e+06	1.93134e+06	1.88196e+06	2.69499e+06	4.69823e+06	2.27998e+06	2.47372e+06	8.88521e+06	2.86118e+06	4.4383e+06	4.37629e+06	4.19528e+06
217	322.692	125.023	1.58883e+06	1.33305e+06	2.78393e+06	2.4926e+06	1.66265e+06	388415	1.13439e+06	1.60328e+06	1.18507e+06	1.14375e+06	729544	250629	742532	921759	965377	1.56906e+06	664413	557441	1.64891e+06	752053	983626	1.16522e+06	1.39242e+06
218	80.5314	127.075	0	1.02523e+06	1.33339e+06	155361	522125	1.46107e+06	369787	805304	222387	241436	1.43833e+07	3.0119e+06	4.21444e+06	1.10387e+07	6.83748e+06	9.56224e+06	1.29299e+07	1.15024e+07	1.38604e+07	7.88167e+06	4.85482e+06	5.08907e+06	4.53287e+06
219	315.379	124.006	6.53348e+08	4.14267e+08	9.17453e+08	1.23261e+09	1.16725e+09	8.06369e+08	8.88467e+08	1.02235e+09	1.26735e+09	1.27995e+09	3.91687e+08	5.72663e+08	4.30218e+08	2.86566e+08	4.6214e+08	9.60975e+08	3.77679e+08	7.13937e+08	8.22367e+08	4.52952e+08	9.50229e+08	9.01858e+08	9.70567e+08
220	223.94	369.227	0	25812	0	0	0	219642	158647	0	0	35295.6	1.75823e+06	22649.9	91796.5	7.31042e+06	0	55690.4	15393.6	107993	2.47415e+06	51001.2	461518	490217	536939
221	69.8399	145.05	7.77518e+07	4.13673e+06	1.89739e+06	4.20925e+06	5.501e+06	2.06571e+06	3.86324e+06	4.18929e+06	7.6819e+06	3.65577e+06	540180	444126	708475	0	523965	2.04591e+06	0	0	1.11264e+06	5.46576e+06	8.40974e+06	6.63889e+06	6.95087e+06
222	65.5385	481.098	0	230060	0	0	0	0	0	0	0	0	6.41053e+06	2.42007e+06	4.61625e+06	2.89642e+06	8.84683e+06	4.39351e+06	844329	869946	2.86908e+06	2.15803e+06	1.12096e+06	1.26978e+06	858943
223	99.808	285.207	557594	1.07473e+06	562778	2.00158e+06	800912	4.64062e+06	4.28316e+06	2.78709e+06	235075	212492	4.07866e+06	2.17732e+06	3.36278e+06	3.35339e+06	4.32815e+06	3.44194e+06	2.46909e+06	4.55669e+06	5.19649e+06	3.95492e+06	2.51801e+06	3.13345e+06	2.97262e+06
224	94.3286	331.118	3.23527e+06	1.54525e+06	1.79481e+06	1.81988e+06	1.35947e+06	1.89429e+06	2.89864e+06	881682	1.3388e+06	1.01591e+06	0	358004	47637.3	96548.4	1.0891e+06	446738	109382	0	0	0	821504	642812	933996
225	87.1915	178.017	7.93017e+06	8.93364e+06	1.09866e+06	3.80882e+06	1.02738e+06	1.57964e+07	9.42576e+06	4.86913e+06	5.59008e+06	6.32028e+06	0	0	0	0	84041.9	0	0	0	0	0	4.01542e+06	3.65039e+06	3.87747e+06
226	390.934	195.05	605300	830940	2.1014e+06	427619	6.79531e+06	440855	322384	2.54597e+06	7.94832e+06	1.37589e+07	230290	145344	218259	246513	239444	461664	172297	242036	232320	202126	1.07966e+06	1.05709e+06	976352
227	469.058	503.162	3.46833e+06	3.42236e+06	5.05364e+07	1.58218e+07	1.58732e+07	2.47154e+06	1.43632e+06	1.33721e+07	1.24445e+07	1.21265e+07	4.57241e+06	2.73716e+07	6.08926e+06	2.60652e+06	537955	2.78995e+07	525822	1.8695e+06	1.31767e+07	1.49557e+07	1.8527e+07	1.76925e+07	1.69526e+07
228	102.644	263.129	3.32589e+06	426710	809203	726633	649214	1.50909e+06	811879	664595	214497	275148	728573	1.0592e+06	805121	857140	1.79225e+06	1.02743e+06	2.47608e+06	879162	1.49942e+06	857693	1.06014e+06	300381	882282
229	103.941	151.039	5.40616e+08	7.80348e+06	1.9426e+06	8.26577e+06	7.3112e+06	6.66367e+07	2.44351e+06	337038	5.91212e+06	7.27031e+06	6.08131e+06	8.28442e+06	5.97008e+06	6.10133e+06	4.76506e+06	5.70211e+06	5.95759e+06	4.51214e+06	1.2442e+07	9.22737e+06	3.18078e+07	3.07291e+07	3.16297e+07
230	377.1	173.081	1.13973e+06	1.30667e+06	0	2.25157e+06	848944	1.8171e+06	831313	2.33324e+06	746583	0	4.20152e+07	8.32362e+07	3.924e+07	2.4519e+07	3.0802e+07	6.03861e+07	2.6204e+07	5.09661e+07	1.01106e+08	2.58869e+07	2.12182e+07	2.20591e+07	2.21881e+07
231	95.6038	306.207	311212	495516	193469	719226	37657.6	379419	1.23393e+06	85270.7	193049	0	4.09364e+06	4.96564e+06	4.18282e+06	5.46116e+06	3.42973e+06	2.85149e+06	3.41165e+06	4.34222e+06	8.36287e+06	7.21489e+06	3.82395e+06	3.59579e+06	4.13702e+06
232	283.576	177.04	4.0044e+07	1.01559e+08	1.03623e+08	2.30387e+07	7.79504e+07	4.2612e+07	2.83096e+07	2.76195e+07	1.0334e+08	2.66536e+07	5.9865e+06	3.01209e+07	2.13618e+07	6.22074e+06	8.8063e+06	1.23288e+07	7.01871e+06	2.11656e+07	2.68549e+07	4.51312e+06	6.43309e+07	6.35829e+07	5.70898e+07
233	124.749	161.044	3.79759e+07	2.22725e+07	6.83336e+07	5.32303e+08	2.01657e+07	1.93441e+07	6.15049e+07	2.82413e+07	1.93952e+07	2.35467e+07	0	0	0	4.65339e+06	2.20054e+06	0	0	0	0	0	3.44135e+07	3.56394e+07	4.31163e+07
234	121.434	451.124	1.15456e+07	4.11973e+06	1.48902e+07	4.90199e+06	5.49758e+06	8.60886e+06	1.1049e+07	7.71527e+06	1.13638e+07	1.40816e+07	2.74157e+06	2.23473e+06	679143	3.37354e+06	3.04484e+06	580202	2.15809e+06	875814	2.88688e+06	4.16954e+06	8.34328e+06	7.04564e+06	6.46498e+06
235	96.5689	341.197	139513	143724	0	170736	191224	725087	688099	266960	56523.9	0	3.69594e+06	6.75222e+06	3.25505e+06	4.94844e+06	4.75324e+06	4.25695e+06	3.57852e+06	6.74525e+06	6.85507e+06	3.50203e+06	3.13179e+06	3.01072e+06	2.82586e+06
236	212.672	119.034	4.34342e+07	1.04069e+08	9.85378e+07	3.75169e+07	2.99612e+07	1.46467e+07	3.93114e+07	4.65553e+07	4.40162e+07	4.54357e+07	4.37592e+07	1.06894e+08	3.66717e+07	4.42122e+07	4.63872e+07	3.10017e+07	3.86648e+07	3.92129e+07	3.64165e+07	5.73891e+07	4.55638e+07	3.13888e+07	4.41004e+07
237	359.101	299.077	3.58598e+07	3.60532e+07	3.04385e+07	4.25638e+07	3.79848e+07	2.52743e+07	5.89161e+07	1.75957e+07	2.51523e+07	1.04662e+07	15038.8	0	17877.8	17509.9	16683.6	0	13028.9	39959.9	16293.1	14808.7	2.13956e+07	2.1638e+07	2.09405e+07
238	55.0565	307.191	259835	721686	2.59674e+06	1.90454e+06	1.07584e+06	2.99118e+06	2.42873e+06	1.56913e+06	391511	772361	9.32081e+06	1.63275e+07	1.82777e+07	2.21348e+07	1.96024e+07	1.21217e+07	1.19983e+07	1.03668e+07	2.02939e+07	1.91158e+07	5.82465e+06	5.96949e+06	5.65465e+06
239	68.2373	379.216	6.23032e+07	4.82259e+07	3.90278e+07	6.90203e+07	6.70084e+07	1.03389e+08	5.12471e+07	1.83476e+08	4.90528e+06	7.0376e+06	2.58688e+06	3.34194e+07	2.46141e+07	2.58233e+07	3.27894e+06	2.12162e+06	3.17645e+06	3.53434e+06	3.19657e+07	2.90637e+07	4.80524e+07	5.02621e+07	5.26638e+07
240	225.889	367.212	0	0	0	0	0	0	0	0	0	0	1.41714e+06	0	0	5.95553e+06	0	20012.9	0	22940.4	1.47645e+06	0	352896	267968	322042
241	57.6549	183.138	0	275338	462873	442473	406208	291380	0	393327	0	0	5.3692e+06	6.57868e+06	5.23382e+06	7.1145e+06	6.14231e+06	4.69577e+06	4.96801e+06	5.29786e+06	7.49299e+06	5.86181e+06	1.28449e+06	1.75916e+06	468591
242	70.8522	591.172	1.039e+07	1.25608e+06	1.02847e+07	2.04073e+06	7.25181e+06	9.66414e+06	1.35368e+07	4.97773e+06	3.17402e+06	1.02467e+07	1.63614e+06	1.1846e+06	1.386e+06	1.64776e+06	1.54014e+06	655771	540203	902352	1.17787e+06	309811	4.82739e+06	4.33923e+06	4.92744e+06
243	275.079	130.05	1.04009e+07	7.38969e+06	1.81629e+07	1.81819e+07	2.29043e+07	2.36519e+07	8.7063e+07	4.45691e+07	3.47141e+07	5.45317e+07	1.46053e+07	1.58628e+07	9.19869e+06	3.01174e+06	8.35803e+06	2.43521e+07	1.21065e+07	1.59452e+07	2.02327e+07	1.07855e+07	2.10742e+07	1.99257e+07	2.23049e+07
244	172.847	129.054	2.6457e+06	2.73946e+06	629706	531823	2.92493e+06	3.80291e+06	3.93895e+06	4.98051e+06	3.42954e+06	7.39675e+06	5.28816e+07	7.07278e+07	4.70426e+07	7.35153e+07	6.41764e+07	5.17955e+07	5.66992e+07	5.47132e+07	6.72014e+07	5.67352e+07	1.85934e+07	1.70353e+07	1.95507e+07
245	52.9531	263.022	4.98397e+07	2.28593e+07	2.94067e+07	7.03516e+07	4.03998e+07	1.3884e+07	7.22161e+07	6.00182e+06	1.77427e+07	8.6049e+06	0	0	0	0	0	0	410592	5.73134e+06	2.84923e+06	5.93417e+06	1.89612e+07	1.7196e+07	1.82899e+07
246	51.5715	171.138	1.06893e+06	5.83906e+06	1.43006e+07	8.99857e+06	4.49144e+06	8.6228e+06	2.55412e+06	9.12603e+06	6.137e+06	3.01153e+06	4.65489e+07	2.07054e+07	2.72757e+07	3.84808e+07	3.74736e+07	3.26249e+07	4.59533e+07	3.59824e+07	4.31391e+07	3.38496e+07	1.4027e+07	1.32535e+07	1.4054e+07
247	182.544	135.03	5.6873e+08	2.89877e+08	5.64136e+08	6.90541e+08	9.24403e+08	3.16437e+08	5.11413e+08	1.12447e+09	5.5626e+08	1.04445e+09	1.20716e+08	5.25781e+08	1.95172e+08	1.04303e+08	1.95249e+08	5.24087e+08	3.62436e+08	6.90009e+08	3.56874e+08	3.45754e+08	5.92344e+08	5.93251e+08	5.93992e+08
248	199.437	213.017	5.33116e+06	7.17763e+06	1.38211e+07	2.4964e+07	1.49646e+07	1.37052e+07	1.23715e+07	1.10877e+07	5.59673e+06	9.42928e+06	1.02765e+07	1.07651e+07	1.7923e+07	1.93154e+07	1.95906e+07	1.20341e+07	1.58327e+07	1.24447e+07	1.97235e+07	1.86292e+07	1.75742e+07	1.77186e+07	1.49735e+07
249	54.2034	145.013	2.22995e+07	4.16305e+07	6.12391e+07	4.5323e+07	5.24853e+07	2.81898e+07	4.22434e+07	2.0987e+07	9.19462e+07	4.34941e+07	4.11508e+07	2.00331e+07	3.02501e+07	2.61708e+07	2.18392e+07	2.18887e+07	1.88907e+07	2.17679e+07	2.99211e+07	3.8365e+07	3.8286e+07	3.44957e+07	4.16451e+07
250	315.707	353.087	30119.5	365679	2.93335e+06	1.34448e+06	2.01029e+06	545077	746873	1.04778e+06	844896	108650	388244	49590.3	155764	202848	193300	0	84949.8	56241.8	197367	592304	756611	909547	891336
251	304.906	148.043	4.2927e+06	1.85717e+06	3.14037e+06	7.64109e+06	9.47862e+06	147420	4.10221e+06	3.86077e+06	4.47309e+07	4.58709e+06	4.21986e+06	954379	1.28887e+06	0	1.61648e+06	6.09995e+07	895427	3.87773e+07	1.04685e+07	2.09893e+06	1.12279e+07	1.10694e+07	9.65433e+06
252	128.471	173.008	1.20076e+07	9.59991e+06	7.76405e+07	1.44877e+07	4.43451e+07	3.58166e+07	4.05675e+06	1.26326e+08	1.97441e+07	4.94286e+06	6.56361e+06	5.73481e+06	739151	309822	6.89952e+06	4.50416e+06	7.08116e+06	4.27445e+07	2.3659e+07	9.41512e+06	2.4662e+07	2.47032e+07	3.26916e+07
253	68.9226	187.133	309234	3.06485e+06	1.73532e+06	2.97334e+06	1.47594e+06	1.05084e+06	3.19179e+06	4.66535e+06	3.25961e+06	436246	3.02697e+07	5.69514e+07	2.91916e+07	1.86053e+07	1.87385e+07	3.60605e+07	1.51127e+07	2.42865e+07	5.33437e+07	2.33745e+07	1.52753e+07	1.57147e+07	1.60806e+07
254	275.986	187.108	2.37307e+06	2.47532e+06	2.0126e+07	4.17148e+07	8.17906e+07	5.30746e+06	2.7548e+07	1.97083e+07	4.47639e+07	1.53779e+08	3.96592e+06	3.84049e+07	1.6075e+06	2.88606e+06	3.09541e+06	1.24569e+08	7.56383e+06	3.9294e+07	2.52178e+07	2.92606e+06	4.90222e+07	3.95252e+07	5.67728e+07
255	69.6046	165.055	2.4464e+08	1.10321e+08	1.14058e+08	8.01888e+07	9.82544e+07	1.5978e+08	1.14385e+08	8.70035e+07	4.16086e+07	5.53942e+07	5.50738e+07	5.71223e+07	8.62385e+07	1.13631e+08	8.72588e+07	6.64487e+07	1.09445e+08	6.52924e+07	8.8495e+07	1.00439e+08	1.16563e+08	1.16903e+08	1.10566e+08
256	216.974	500.278	0	1.18714e+06	1.08205e+06	3.56246e+06	4.81915e+06	541248	1.0195e+07	3.6784e+06	1.18817e+07	1.51475e+07	269318	9.22205e+06	4.50458e+06	0	172072	6.3181e+06	5.14887e+06	6.82569e+06	972534	432904	4.29692e+06	4.15559e+06	3.87708e+06
257	41.5153	138.026	1.60416e+06	2.1592e+06	1.98924e+06	2.45695e+07	2.33042e+06	1.01207e+07	1.24634e+07	1.56952e+06	5.66618e+06	3.43742e+06	5.73329e+06	9.00829e+06	1.36145e+07	7.96801e+06	2.31718e+06	1.3389e+06	1.34426e+06	325267	1.41686e+07	8.26511e+06	2.38819e+06	2.04999e+06	2.04766e+06
258	96.1328	181.049	4.31429e+08	3.46374e+06	7.17261e+06	3.51838e+06	4.03969e+06	1.16362e+07	7.33152e+06	3.25824e+06	4.86703e+06	9.23261e+06	1.3902e+06	498174	1.35275e+06	1.40606e+06	1.08549e+06	1.07446e+06	1.77331e+06	3.38431e+06	281885	4.45714e+06	3.6305e+07	3.89707e+07	1.9571e+07
259	49.5919	319.119	4.71133e+06	3.27012e+06	5.64565e+06	1.53924e+07	4.67747e+06	6.66114e+06	3.68206e+06	1.20088e+06	1.455e+06	1.64072e+06	1.30725e+07	6.78183e+06	1.11203e+07	2.12887e+07	1.34002e+07	1.46862e+07	2.35973e+07	8.68669e+06	1.07036e+07	1.14149e+07	6.68798e+06	7.68381e+06	6.174e+06
260	172.574	152.034	457611	4.99696e+06	5.29201e+06	1.81382e+06	5.30556e+06	5.74252e+06	1.29374e+06	1.03178e+07	3.20961e+06	5.82698e+06	3.39511e+06	4.04475e+06	4.9527e+06	5.00633e+06	8.82245e+06	3.63334e+06	6.05334e+06	4.24612e+06	7.95847e+06	7.94829e+06	5.33999e+06	5.29125e+06	5.46e+06
261	509.473	665.213	93432.9	58254.7	1.004e+07	1.00645e+06	2.89761e+06	357148	0	1.26466e+06	5.73356e+06	3.76524e+06	22153.8	1.25024e+07	126190	38305.5	0	7.51155e+06	0	35871.1	1.16531e+06	106543	2.88986e+06	2.99242e+06	3.1083e+06
262	190.966	611.198	2.2748e+07	1.07391e+06	2.58969e+07	1.6534e+06	1.77608e+07	1.14474e+07	6.98494e+06	2.5589e+07	7.85581e+06	6.15822e+07	45426.3	0	0	0	0	0	0	0	0	0	1.29397e+07	1.21915e+07	1.25919e+07
263	178.742	128.009	2.31707e+06	3.49463e+06	2.31227e+06	1.92632e+06	5.25618e+06	3.59162e+06	6.9842e+06	1.98059e+06	1.37227e+07	1.71777e+06	5.37891e+07	568477	92078.6	86034.1	6.39329e+07	3.90936e+07	9.50293e+07	7.56341e+07	744343	357566	1.50325e+07	1.6016e+07	1.53142e+07
264	152.458	165.055	2.29526e+08	2.20007e+07	6.24843e+07	7.21646e+07	2.72554e+08	3.05422e+08	6.73199e+08	9.97919e+07	2.70633e+08	6.52169e+08	1.33531e+08	1.79679e+08	5.12232e+07	4.62924e+07	1.52394e+07	2.40111e+08	4.48432e+07	5.40379e+07	6.42602e+07	8.50216e+07	2.0567e+08	2.20214e+08	2.06839e+08
265	105.071	177.04	1.94259e+07	2.79497e+07	5.65999e+07	2.48771e+07	5.18199e+07	1.63516e+07	1.34744e+07	2.11984e+07	4.93505e+07	5.53293e+07	3.24912e+06	7.22526e+06	1.1091e+07	2.04585e+07	8.55391e+06	1.00297e+07	1.01631e+07	1.24064e+07	1.50629e+07	1.58501e+07	1.83918e+07	1.81107e+07	2.662e+07
266	33.2426	141.091	0	0	0	0	0	0	0	0	0	0	1.90593e+07	2.67243e+07	1.50932e+07	1.83203e+07	1.7402e+07	2.10944e+07	1.46036e+07	2.10922e+07	2.80444e+07	1.29543e+07	7.25468e+06	7.88519e+06	8.6338e+06
267	275.186	125.023	4.24465e+06	3.36159e+06	6.22028e+06	6.33308e+06	5.28846e+06	3.00767e+06	4.89322e+06	6.73193e+06	5.54088e+06	3.86469e+06	2.22904e+06	1.26528e+06	3.28435e+06	3.65627e+06	5.82125e+06	2.47255e+06	2.58835e+06	649413	5.52299e+06	3.29142e+06	5.1544e+06	4.66546e+06	1.22746e+06
268	244.688	307.034	1.70515e+06	1.44402e+06	4.1055e+06	1.77045e+06	1.51291e+07	4.61683e+06	1.06687e+07	7.63612e+06	5.95847e+06	1.66497e+07	5.62805e+06	1.22711e+07	7.26461e+06	5.06103e+06	9.3873e+06	7.59209e+06	7.48682e+06	8.42723e+06	5.28608e+06	5.65425e+06	7.95205e+06	7.67823e+06	5.19469e+06
269	277.11	117.054	2.96038e+07	0	0	554226	0	1.65824e+06	9.20735e+06	0	0	0	5.65138e+06	5.77259e+06	2.54339e+06	3.65278e+06	3.18501e+06	3.76419e+06	3.17664e+06	3.41598e+06	3.41104e+06	4.34634e+06	2.71455e+06	2.73022e+06	3.27291e+06
270	49.1415	193.053	3.43916e+07	1.18342e+08	8.33327e+07	3.80776e+07	1.49522e+07	3.95328e+06	2.38849e+07	5.91372e+07	1.96449e+07	2.49569e+07	2.19547e+06	4.70578e+06	1.24696e+06	1.69959e+06	1.16018e+06	968953	2.47845e+06	1.65273e+06	1.35038e+06	3.65691e+06	2.31236e+06	3.06543e+07	2.95718e+07
271	73.3982	177.04	273927	4.34371e+06	6.12444e+06	7.23744e+06	4.1066e+06	7.20551e+06	675136	5.21579e+06	3.63852e+06	2.10339e+06	2.51288e+06	1.18886e+06	6.04461e+06	5.69435e+06	9.89843e+06	3.03265e+06	5.23544e+06	3.27614e+06	9.45202e+06	1.00666e+07	2.52961e+06	4.90452e+06	3.25522e+06
272	197.042	423.129	1.62771e+07	1.39227e+06	2.57937e+06	3.1321e+06	5.82937e+06	7.9874e+06	4.74192e+06	5.40283e+06	1.93844e+06	7.94421e+06	1.22151e+06	489221	602665	1.04183e+06	369153	741619	955685	168405	790063	237639	4.0373e+06	4.85943e+06	3.32327e+06
273	97.2887	151.06	1.83907e+07	2.80735e+07	2.6563e+07	8.20827e+06	9.41469e+06	1.52308e+08	9.50976e+07	5.32158e+07	1.06303e+07	6.49606e+06	7.37376e+06	4.44678e+06	8.33479e+06	7.25313e+06	9.74299e+06	1.60764e+07	7.20581e+06	2.97842e+06	1.06412e+07	6.98264e+06	3.66021e+07	4.08483e+07	4.44513e+07
274	79.7817	135.044	5.9671e+08	2.4568e+08	3.27058e+08	1.709e+08	1.49174e+08	3.57161e+08	1.96764e+08	1.96084e+08	1.35201e+08	1.32522e+08	1.5963e+06	1.3626e+06	2.96149e+06	7.07675e+06	1.27516e+06	1.12635e+06	4.71153e+06	2.70741e+06	2.39198e+06	2.71701e+06	1.62243e+08	1.62237e+08	1.59865e+08
275	280.574	243.16	78715.5	590372	328459	493329	149317	1.05716e+06	169580	409835	0	0	1.74769e+06	1.5321e+06	813552	1.20191e+06	1.1379e+06	799693	714790	967105	2.10646e+06	1.11532e+06	764941	811356	580530
276	218.528	115.039	8.13399e+06	8.31641e+06	1.11129e+07	1.02343e+07	7.61209e+06	7.4816e+06	8.87515e+06	1.06256e+07	1.20294e+07	8.77519e+06	1.87214e+08	1.79416e+08	1.36353e+08	2.47226e+08	2.51382e+08	1.71915e+08	1.55637e+08	1.42539e+08	1.82026e+08	1.67716e+08	8.27441e+07	8.13539e+07	8.35524e+07
277	72.5973	207.05	1.43323e+07	4.07827e+07	7.32783e+07	9.43881e+07	6.12011e+07	4.37834e+07	4.06916e+07	7.24363e+07	8.35273e+07	5.26544e+07	1.41964e+07	2.16775e+07	2.60523e+07	2.25799e+07	4.16449e+07	2.34716e+07	2.22522e+07	1.92401e+07	5.28981e+07	2.77886e+07	5.70504e+07	3.9922e+07	4.16557e+07
278	322.801	226.083	895281	38316.4	4.51579e+06	453268	1.96489e+07	2.74163e+06	4.1274e+06	668367	159412	626361	2.36925e+06	177937	490672	1.95651e+06	150887	7.18572e+06	82496	2.48094e+06	3.18198e+06	436270	3.8656e+06	3.88669e+06	3.38596e+06
279	72.2663	351.184	1.1279e+07	7.95936e+06	6.86782e+06	8.35361e+06	8.71702e+06	1.26872e+07	6.29626e+06	2.14411e+07	7.48729e+06	2.98462e+06	380706	5.20049e+06	4.3688e+06	4.81219e+06	851413	367497	904936	626594	5.51831e+06	4.645e+06	6.57207e+06	7.21161e+06	1.16335e+07
280	51.666	293.212	1.45321e+07	2.43266e+07	2.03027e+07	2.86383e+07	8.18333e+06	4.31344e+07	2.05621e+07	3.40197e+07	7.63518e+06	3.98173e+06	1.08895e+07	1.78835e+07	2.35795e+07	1.84698e+07	2.62534e+07	1.48811e+07	9.75721e+06	1.07298e+07	2.66619e+07	2.48041e+07	1.72374e+07	1.78645e+07	1.73417e+07
281	161.693	435.13	0	0	90457.6	0	0	0	304059	0	340483	0	2.37609e+06	7.73929e+06	2.72126e+06	4.0811e+06	8.27971e+06	2.27596e+06	3.23886e+06	1.12742e+06	1.9194e+06	3.77643e+06	1.11141e+06	1.16965e+06	1.26699e+06
282	110.698	141.018	2.47271e+07	4.98809e+07	6.60238e+07	7.89132e+07	4.11134e+07	2.14498e+07	5.27687e+07	2.58722e+07	2.7129e+07	3.27664e+07	3.69337e+06	818875	2.97241e+06	3.83056e+06	3.21006e+06	359043	4.79738e+06	1.31263e+06	4.48355e+06	2.80534e+06	2.47254e+07	2.76769e+07	2.34065e+07
283	178.735	157.026	1.57958e+06	2.00125e+06	1.59488e+06	1.4529e+06	1.01156e+06	1.33823e+07	1.60873e+06	2.02892e+07	1.59039e+06	1.14025e+06	7.9996e+06	1.78896e+06	1.38067e+06	3.45539e+06	2.76067e+06	5.91269e+06	1.38262e+06	7.66312e+06	1.28505e+06	2.14777e+06	1.45998e+06	2.92697e+06	1.85981e+06
284	278.625	201.124	1.02893e+06	0	1.72969e+07	4.96337e+07	1.36499e+08	1.21942e+06	3.0134e+07	1.50179e+07	1.18589e+08	2.08396e+08	2.78009e+06	9.65535e+07	2.82701e+06	0	0	1.61455e+08	6.93638e+06	5.87228e+07	3.49011e+07	0	7.07293e+07	6.15456e+07	5.5328e+07
285	425.569	132.029	3.56128e+06	148211	3.18132e+06	716823	4.66019e+06	732219	964043	1.50162e+06	1.62793e+07	4.54449e+07	0	7.69112e+06	21883.8	82830.1	81052.9	9.17251e+06	37123.2	804816	119204	64601.9	4.33988e+06	5.39375e+06	4.11881e+06
286	160.009	371.15	1.99727e+06	1.96591e+06	1.23692e+06	5.19201e+06	430469	494133	1.76452e+06	675322	690006	391998	3.70115e+06	261696	1.17651e+06	2.02811e+06	756959	398765	995124	0	1.43117e+06	1.2655e+06	502890	328762	561054
287	134.821	123.044	3.08164e+07	2.65149e+07	7.82794e+07	3.49723e+07	3.4716e+07	2.90234e+07	2.58958e+07	3.67021e+07	3.51737e+07	3.9513e+07	1.7906e+07	1.34368e+07	5.3943e+06	2.08485e+07	1.7981e+07	1.72568e+07	8.98121e+06	6.08369e+06	1.39053e+07	4.54989e+06	2.87339e+07	2.95052e+07	2.90839e+07
288	312.029	274.14	1.04448e+06	0	659937	415405	1.69718e+06	108081	376704	0	2.09931e+06	5.68755e+06	124121	1.00719e+06	31608.4	0	0	840661	45163	862019	569155	55141.4	1.27784e+06	1.05845e+06	1.17205e+06
289	68.1547	449.181	373460	1.51938e+06	0	184244	924260	0	156567	686320	164960	0	1.68435e+06	758405	681227	748816	1.48044e+06	796643	588574	368740	447985	334447	253944	185109	278646
290	25.3586	223.1	3.40374e+06	2.27721e+07	1.08526e+07	2.20449e+07	9.4969e+06	4.96436e+06	5.86982e+06	2.12118e+06	3.27422e+07	9.49815e+06	0	449276	0	320819	323550	0	0	713179	754607	276097	8.21365e+06	7.0757e+06	9.20665e+06
291	78.7595	131.034	2.09164e+07	5.25171e+06	7.06068e+06	4.48536e+06	9.64821e+06	9.12855e+06	0	7.08347e+06	5.95123e+06	9.23725e+06	2.50478e+06	1.26522e+06	5.51804e+06	6.05642e+06	1.16215e+07	6.36178e+06	5.47465e+06	4.23084e+06	8.59386e+06	1.04914e+07	7.79373e+06	6.19617e+06	8.64865e+06
292	428.464	160.061	354912	246621	3.33023e+06	677827	2.13473e+06	354947	761447	1.19901e+06	6.84129e+06	9.71442e+06	138835	2.35657e+06	304612	58711	105989	6.65489e+06	54948.5	944975	581633	136050	2.05302e+06	2.03266e+06	2.20413e+06
293	288.604	158.081	2.48008e+07	1.50083e+06	2.11218e+06	1.34391e+06	1.8753e+06	3.49648e+06	1.28547e+07	1.23788e+06	922915	1.67855e+06	1.20867e+06	1.08987e+06	782129	692567	778761	1.50562e+06	813505	1.74373e+06	1.18072e+06	1.08498e+06	3.54507e+06	3.3261e+06	3.71208e+06
294	338.928	266.089	378167	268436	941143	219046	163349	53099.4	199951	257891	198469	395157	0	0	0	0	0	0	0	0	0	0	245888	191213	174321
295	86.6558	445.113	158607	1.12873e+06	777526	1.58339e+06	522555	957488	1.69936e+06	1.65082e+06	0	33793.5	0	124260	0	0	0	0	0	0	101570	0	203393	496529	402311
296	234.085	129.054	4.56594e+06	511799	1.19034e+06	393500	830510	2.38123e+06	2.16174e+06	1.63093e+06	1.32741e+06	2.01784e+06	1.03227e+07	7.55848e+06	6.99263e+06	1.13481e+07	8.6629e+06	6.93717e+06	5.65869e+06	5.77301e+06	9.97757e+06	8.46121e+06	4.52527e+06	4.06744e+06	4.59695e+06
297	60.7311	325.202	1.30599e+06	1.16002e+06	987170	382629	752685	2.23428e+06	1.94006e+06	1.51515e+06	948212	1.61626e+06	6.19976e+06	5.68741e+06	8.15163e+06	1.46588e+07	1.00994e+07	6.4897e+06	6.68295e+06	5.37029e+06	1.15561e+07	6.70581e+06	2.39688e+06	1.7786e+06	1.72257e+06
298	71.6983	457.081	0	2.63662e+06	4.5183e+06	582197	3.65707e+06	149186	3.76678e+06	0	2.4895e+06	1.42077e+06	0	0	0	0	0	0	0	0	0	0	439105	929176	765148
299	331.689	253.092	1.1893e+07	1.50949e+06	1.00017e+07	1.788e+06	705957	7.35103e+07	1.19352e+07	2.74247e+06	885341	744812	648817	2.44102e+06	377488	422267	1.82596e+06	2.37981e+06	326342	428155	1.86438e+06	346106	6.84061e+06	6.16658e+06	6.41428e+06
300	55.9438	225.08	941200	4.54706e+06	2.77431e+06	1.14938e+07	5.46361e+06	573671	9.35682e+06	903342	3.81477e+06	3.40581e+06	1.43102e+06	1.8686e+06	781350	1.52093e+06	1.54559e+06	1.78156e+06	1.74482e+06	1.58245e+06	1.17962e+06	1.60658e+06	1.5746e+06	2.09642e+06	2.08359e+06
301	101.774	353.233	308476	3.24645e+06	1.55241e+06	5.89454e+06	515833	7.44556e+06	3.83282e+06	8.0406e+06	282235	2.48549e+06	834129	1.09933e+06	241826	1.10724e+06	824013	997765	434067	735209	889906	1.55765e+06	1.73804e+06	1.72196e+06	1.30668e+06
302	60.2842	167.07	0	0	1.16533e+07	0	294605	495846	0	1.07332e+06	0	0	2.64727e+07	4.53229e+07	3.04463e+07	5.45421e+07	5.84753e+07	4.24196e+07	2.10261e+07	4.09521e+07	5.11543e+07	2.42754e+07	963701	1.87451e+06	2.32061e+06
303	153.772	211.06	5.92038e+06	6.66032e+06	1.05582e+07	5.58465e+06	3.69177e+06	5.30772e+06	6.60395e+06	4.00783e+06	7.68723e+06	2.24581e+06	3.76835e+06	3.24587e+06	2.23091e+06	3.70513e+06	1.27906e+06	2.39118e+06	2.70992e+06	2.64077e+06	1.87136e+06	2.9621e+06	5.23865e+06	2.318e+06	4.65298e+06
304	65.5461	173.044	1.57733e+06	1.58483e+07	8.06754e+06	3.43219e+06	6.43718e+06	7.58351e+06	1.84414e+06	5.11404e+06	1.05486e+07	6.89538e+06	0	0	0	0	0	0	0	0	0	0	469151	490312	1.80225e+06
305	272.506	375.129	5.5836e+06	2.92511e+06	1.02966e+07	4.07721e+06	4.79695e+06	4.18599e+06	6.33129e+06	3.2303e+06	3.03636e+06	4.08356e+06	0	0	107876	192372	65688.2	192082	0	0	52517.9	31825.2	3.21511e+06	3.77819e+06	3.44009e+06
306	217.602	151.039	1.23147e+08	1.38948e+07	0	2.31621e+07	6.88398e+06	6.49593e+06	2.14377e+07	6.60202e+06	4.51267e+06	4.60453e+06	1.56622e+06	1.70956e+06	1.57524e+06	2.16234e+06	2.58497e+06	1.42407e+06	1.77836e+06	1.71215e+06	2.2751e+06	1.9406e+06	1.21647e+07	1.29786e+07	1.06163e+07
307	142.695	143.106	0	90260.6	419015	0	0	898178	200743	0	516391	0	4.03614e+07	4.3868e+07	2.93604e+07	5.38295e+07	6.09032e+07	5.0879e+07	3.13347e+07	4.51336e+07	6.22831e+07	3.10912e+07	1.61716e+07	1.66714e+07	1.76678e+07
308	152.468	151.039	2.51034e+07	1.50309e+07	1.07349e+07	1.35256e+07	1.41106e+07	1.9221e+07	1.63222e+07	1.1599e+07	8.9543e+06	6.33874e+06	3.85077e+06	2.5184e+06	4.1361e+06	5.88672e+06	3.80921e+06	4.14212e+06	5.72289e+06	6.47576e+06	8.20561e+06	1.16183e+07	1.24101e+07	1.11417e+07	8.93465e+06
309	96.3815	168.065	2.16646e+08	0	6.99943e+06	228000	0	6.27191e+06	1.46331e+07	4.79246e+06	413809	6.7249e+06	139285	3.64094e+06	0	0	259434	1.15622e+06	273618	1.69863e+06	1.21825e+06	219860	8.52133e+06	8.351e+06	8.75929e+06
310	176.026	257.077	1.24762e+06	609371	907031	430158	1.64667e+06	1.66698e+06	3.53881e+06	227950	1.16379e+06	3.48186e+06	2.49362e+06	2.5347e+06	1.09699e+06	1.23989e+06	2.68907e+06	3.09045e+06	1.14882e+06	2.36739e+06	1.45311e+06	1.82447e+06	1.20389e+06	1.19122e+06	1.20785e+06
311	55.9374	163.039	5.52877e+07	7.17018e+06	1.59836e+07	1.87772e+07	1.94453e+07	3.17231e+07	3.15449e+07	1.80286e+07	1.2583e+07	7.58404e+07	5.45171e+06	2.29065e+07	7.99154e+06	3.57009e+06	5.56435e+06	1.78649e+07	1.45181e+07	6.98288e+06	1.07718e+07	4.78636e+06	2.05545e+07	2.1715e+07	2.35979e+07
312	205.81	239.092	1.39297e+06	304341	1.11852e+06	1.19058e+06	625239	986931	937526	636422	567392	745021	317988	207510	659106	524764	508171	245383	223291	651183	397502	191707	1.16746e+06	466070	970648
313	164.331	315.049	218660	425570	88970.4	75611.4	0	337150	1.1248e+06	269713	118543	0	0	0	0	0	444560	0	219343	0	0	0	1.37003e+06	1.32131e+06	1.13171e+06
314	217.602	117.054	9.46149e+07	0	0	3.89425e+06	0	2.3057e+06	1.61288e+07	0	0	0	1.08366e+07	8.68466e+06	7.6425e+06	1.17913e+07	8.86092e+06	1.02992e+07	7.56801e+06	7.44714e+06	1.05332e+07	6.23202e+06	1.00364e+07	1.40352e+07	9.30877e+06
315	147.398	453.261	260334	1.43917e+08	1.90664e+06	7.71216e+06	2.99685e+06	3.45602e+06	8.41533e+06	2.43522e+06	358086	188577	0	0	277216	194649	120698	0	133593	0	409711	217260	6.42006e+06	7.52913e+06	8.12589e+06
316	195.059	367.103	2.49706e+08	9.37849e+07	8.29393e+08	2.68963e+08	4.6408e+08	4.02999e+08	3.60583e+08	5.30651e+08	2.54849e+08	3.86346e+08	30770.2	0	0	0	216862	0	72987.7	0	120197	0	2.34014e+08	2.05285e+08	1.99323e+08
317	329.899	337.054	342641	423486	2.24268e+06	2.14923e+06	1.70363e+06	718165	1.36952e+06	1.77255e+06	8.75013e+06	5.7637e+06	255418	889243	193267	299014	383908	1.0994e+06	46903	89677.2	1.28058e+06	274799	1.42106e+06	1.20098e+06	941194
318	3.52133	130.086	7.29548e+06	6.79415e+06	6.47942e+06	2.69778e+06	0	2.5976e+06	0	0	0	0	3.27469e+06	2.20647e+06	2.09341e+06	2.99866e+06	4.85422e+06	3.22283e+06	1.7786e+06	0	0	0	0	3.09922e+06	7.47923e+06
319	28.5085	165.022	6.81383e+06	1.44132e+07	1.2295e+07	1.91984e+07	1.58071e+07	6.06343e+06	7.30205e+06	4.79287e+06	5.34892e+06	1.07073e+07	322686	3.89295e+06	1.23008e+06	674410	618121	714162	1.17567e+06	1.51996e+06	1.13233e+06	435339	7.97248e+06	1.09474e+07	1.14964e+07
320	28.4053	167.037	5.9489e+07	7.35494e+07	9.58269e+07	9.88737e+07	7.94757e+07	6.93657e+07	7.62167e+07	4.74977e+07	2.06136e+08	8.95492e+07	4.01104e+07	6.58757e+07	5.51318e+07	1.41924e+08	6.78839e+07	4.19981e+07	4.10228e+07	3.57589e+07	9.44962e+07	4.38004e+07	7.10547e+07	8.6149e+07	872626
321	39.0911	181.049	3.17857e+07	8.52125e+06	6.51997e+07	2.64737e+07	3.15105e+07	2.90284e+07	3.35124e+07	2.63704e+07	3.40153e+07	2.58773e+07	5.435e+07	5.93174e+07	7.06061e+07	9.2916e+07	7.63804e+07	4.58132e+07	9.24992e+07	5.71294e+07	6.19988e+07	1.36568e+08	4.56414e+07	4.56226e+07	4.76014e+07
322	17.6684	213.015	696529	970638	611665	347886	477996	309936	484323	724084	304854	1.26154e+06	299606	259488	411864	551829	752964	2.2784e+06	263742	442627	768764	477791	730491	321248	1.38772e+06
323	188.827	329.064	197274	224546	2.33223e+06	576775	867780	775027	2.05948e+06	895044	1.54845e+06	700276	0	368976	75194.3	211792	573592	1.48953e+06	467313	183159	1.93776e+06	467940	1.20967e+06	544845	980332
324	85.3762	429.118	0	1.37129e+06	969277	1.27079e+06	304597	0	967732	323371	0	34881.5	0	0	0	0	0	0	0	0	0	0	169127	0	99795.6
325	403.942	242.08	1.077e+08	3.00909e+06	1.09975e+07	2.76107e+06	3.02543e+07	1.14232e+07	1.40798e+07	1.3823e+07	1.76597e+07	8.33848e+06	3.20826e+06	1.05439e+07	6.73278e+06	4.2722e+06	1.48052e+06	2.33587e+07	5.06846e+06	1.25782e+07	1.1467e+07	6.33313e+06	1.71935e+07	1.66737e+07	1.5817e+07
326	33.1854	237.079	5.66305e+06	1.26237e+07	7.40265e+06	1.40431e+07	5.27369e+06	5.65637e+06	3.16792e+06	5.79465e+06	1.9618e+07	6.09374e+06	1.40763e+06	3.93734e+06	2.12465e+06	4.12214e+06	1.07687e+06	94784.7	2.2827e+06	1.10829e+06	5.41999e+06	2.00826e+06	4.28741e+06	6.23063e+06	4.9559e+06
327	83.4835	403.14	1.04843e+06	747669	1.41876e+06	592202	1.30576e+06	1.21914e+06	1.26756e+06	336974	916554	1.05207e+06	0	0	0	63667.6	0	0	273794	0	0	0	423907	125368	413367
328	411.193	214.048	1.77247e+07	1.10516e+06	4.92939e+06	2.39221e+06	1.56065e+07	1.1546e+07	8.85418e+06	4.20647e+06	3.87511e+07	3.54591e+07	1.21261e+06	1.81859e+07	2.92347e+06	263878	80874	2.32393e+07	952382	5.17804e+06	3.91127e+06	1.06838e+06	1.21979e+07	1.15529e+07	1.13756e+07
329	17.9821	158.081	654518	674726	846838	753838	646384	501949	541648	514476	563803	727099	543502	680434	653292	600274	634661	552441	635233	640945	688834	557950	370694	537638	836079
330	93.7738	241.082	1.51131e+07	7.67092e+06	4.43832e+07	2.4302e+07	2.17885e+06	1.4298e+07	4.42784e+06	2.05604e+07	1.53156e+07	8.95089e+06	6.89855e+06	1.21248e+07	4.43934e+06	4.60318e+06	7.42391e+06	3.14084e+07	4.89082e+06	8.87798e+06	8.14762e+06	6.17246e+06	1.12419e+07	9.74281e+06	1.14397e+07
331	279.149	344.135	6.19212e+06	1.05362e+06	1.39029e+07	1.27107e+07	8.59977e+07	3.41426e+06	2.35652e+07	2.27718e+07	1.47195e+08	1.67936e+08	5.40049e+06	2.66261e+07	6.27196e+06	2.0308e+06	5.12999e+06	6.4406e+07	7.34244e+06	2.83439e+07	5.26792e+07	1.05648e+07	4.51009e+07	4.72711e+07	4.06626e+07
332	195.996	159.065	0	0	0	108387	0	0	0	0	0	0	7.38757e+06	7.71829e+06	4.02334e+06	4.86458e+06	5.62126e+06	8.21888e+06	3.03006e+06	5.52973e+06	6.55554e+06	4.50515e+06	2.67347e+06	2.54299e+06	1.92998e+06
333	377.187	259.129	2.47472e+06	121707	1.47056e+06	2.59062e+06	8.13597e+06	380678	1.34653e+06	636617	8.61183e+06	1.816e+07	60923.9	5.9619e+06	93302.2	64599.9	47364	7.28301e+06	179754	3.00622e+06	1.04266e+06	84464.5	2.7053e+06	2.86908e+06	2.80339e+06
334	198.853	192.066	1.5595e+06	526961	1.03826e+06	932186	511580	688978	1.46408e+06	806248	1.20545e+06	1.05473e+06	2.73492e+06	1.88793e+06	1.06617e+06	800542	1.31797e+06	2.00192e+06	2.85303e+06	2.07476e+06	6.41108e+06	1.72716e+06	1.77297e+06	1.8833e+06	1.81418e+06
335	275.191	101.023	7.86639e+07	9.70892e+07	1.09312e+08	1.78104e+08	1.26363e+08	5.07574e+07	1.06191e+08	1.4305e+08	2.0777e+08	1.13451e+08	5.42497e+07	9.29944e+07	8.69192e+07	6.77194e+07	1.03217e+08	9.5429e+07	5.86084e+07	9.13431e+07	9.63808e+07	6.42736e+07	1.28185e+08	1.76342e+08	1.28047e+08
336	38.6105	337.107	2.76384e+06	4.57015e+06	1.19819e+06	3.67668e+06	9.78703e+06	4.90381e+06	1.42745e+07	0	1.10902e+06	5.06893e+06	0	0	313854	69010.2	99939.3	0	0	0	0	0	1.96829e+06	1.10959e+06	2.02098e+06
337	189.386	261.055	1.78009e+06	624966	1.35769e+06	4.62271e+06	3.26283e+06	3.92141e+06	2.47493e+06	1.41494e+06	1.53123e+06	5.02723e+06	1.39905e+07	4.94407e+07	5.36153e+07	4.19086e+06	4.59722e+06	1.48952e+07	7.05868e+06	9.82192e+06	9.08234e+07	9.55893e+06	9.25762e+06	2.16955e+07	2.1561e+07
338	149.97	153.018	4.58271e+07	3.35595e+07	6.32807e+07	3.39295e+07	2.34942e+07	3.59149e+07	4.22771e+07	5.33147e+07	2.8999e+07	1.6011e+07	1.21886e+06	3.84413e+06	563214	2.67326e+06	8.55019e+06	757234	1.50045e+06	2.98703e+06	4.82116e+06	0	3.43807e+07	2.38378e+07	3.31634e+07
339	195.708	271.059	7.43369e+06	7.67132e+07	7.96265e+07	2.60407e+07	1.41702e+07	1.47233e+07	1.40218e+07	8.27821e+06	4.54374e+07	3.68172e+07	2.16617e+06	599388	972846	920064	1.67453e+06	906810	1.62622e+06	854597	3.19092e+06	802526	2.37009e+07	2.29635e+07	2.09484e+07
340	190.589	223.074	2.38174e+06	441330	0	0	285511	998390	617702	852163	247949	1.21579e+06	7.48022e+06	5.59329e+06	5.0686e+06	1.11118e+07	2.10528e+06	7.47368e+06	6.86232e+06	2.29057e+06	1.12561e+07	3.25237e+06	3.8652e+06	3.48026e+06	3.83974e+06
341	229.79	325.088	2.9502e+06	931896	895223	8.22276e+06	1.79258e+06	3.76915e+06	1.09152e+07	1.78623e+06	725763	480830	7.5569e+06	611701	802761	348964	167197	647956	109152	853623	21739.6	146034	1.54963e+06	1.66624e+06	1.82231e+06
342	310.972	193.035	3.48554e+06	3.62775e+06	1.06779e+07	6.16835e+06	6.88182e+06	3.42374e+06	3.54604e+06	4.90814e+06	8.07263e+06	2.16274e+06	401583	1.02675e+06	264445	349266	431504	1.66022e+06	254492	297355	2.03455e+06	490882	4.33203e+06	4.21367e+06	4.36272e+06
343	55.0789	205.035	0	0	6.8868e+06	4.34185e+06	1.40745e+07	2.02276e+07	0	5.99538e+06	4.31929e+06	398143	271374	360426	553536	207256	362048	3.03998e+06	829486	7.72364e+06	1.34301e+07	8.01922e+06	3.74308e+06	3.41023e+06	2.74103e+06
344	63.8112	622.438	2.35353e+06	2.51413e+06	0	0	1.9281e+06	6.50727e+06	509365	5.73849e+06	5.00069e+06	3.23114e+06	3.14766e+06	85815.7	273944	275358	1.58433e+06	2.0297e+06	2.44943e+06	2.53861e+06	0	260558	2.52093e+06	1.89104e+06	1.78178e+06
345	359.087	137.023	3.54756e+07	3.47565e+07	3.01674e+07	4.05005e+07	3.64804e+07	2.53617e+07	5.74546e+07	1.96767e+07	2.56004e+07	1.23754e+07	2.57097e+06	5.38998e+06	2.09848e+06	2.665e+06	5.1843e+06	2.35776e+06	2.05268e+06	2.45678e+06	2.80886e+06	3.95906e+06	2.16341e+07	2.20319e+07	2.2993e+07
346	18.4945	130.086	6.01146e+06	6.46309e+06	6.45139e+06	2.80149e+06	6.53582e+06	2.40709e+06	3.8616e+06	7.85346e+06	3.12965e+06	4.62644e+06	3.2328e+06	2.23729e+06	1.82287e+06	3.12049e+06	6.35428e+06	2.2167e+06	2.67875e+06	3.34878e+06	2.43623e+06	2.66743e+06	2.64469e+06	3.43394e+06	5.66826e+06
347	333.438	251.068	0	0	0	0	0	63924.8	0	0	0	0	214399	560815	281369	328702	162619	434556	295906	432723	840835	155470	211314	112904	77248.8
348	254.239	235.108	4.39525e+06	72196	1.3142e+06	3.41089e+06	1.05758e+07	295252	2.42137e+06	585023	5.04306e+06	1.41639e+07	224572	6.75388e+06	72779.6	0	0	6.07675e+06	457205	4.6727e+06	1.39003e+06	33575.1	3.54686e+06	3.31379e+06	3.37649e+06
349	183.569	483.272	4.00556e+06	8.80031e+06	1.56038e+06	2.27226e+06	3.76458e+06	4.25991e+06	6.69462e+06	1.78961e+06	5.89301e+06	1.87837e+06	1.33661e+06	1.9162e+06	1.61868e+06	1.37322e+06	1.8669e+06	2.19896e+06	1.94034e+06	2.28714e+06	2.61778e+06	472614	3.40784e+06	3.15996e+06	2.35512e+06
350	233.246	322.114	105036	0	146455	505846	746301	0	556358	281110	894887	405039	19313.4	57117.9	0	0	0	23617	0	165920	121783	0	402324	415001	453895
351	98.9548	279.123	65280	1.46255e+06	754769	1.21083e+06	421929	442517	687829	1.89148e+06	1.01996e+06	379187	709159	590792	764872	767621	750756	690143	619398	636406	1.64864e+06	1.04517e+06	1.12181e+06	920638	1.10569e+06
352	31.2998	297.043	1.67753e+07	0	1.18812e+07	1.20295e+07	1.03881e+07	4.7234e+07	6.61451e+07	5.16852e+06	1.88891e+06	2.89281e+07	7.12071e+06	8.46452e+06	2.99538e+06	348018	0	1.14241e+07	7.05888e+06	3.2046e+06	4.52159e+06	948297	1.52241e+07	1.57639e+07	9.05267e+06
353	131.139	185.081	478924	2.04427e+06	3.16091e+06	1.84274e+06	973721	2.61114e+06	1.47596e+06	3.21212e+06	1.37181e+06	321885	1.73443e+08	2.55667e+08	1.49167e+08	1.49928e+08	2.05395e+08	2.03556e+08	9.87618e+07	1.87235e+08	2.67024e+08	1.69614e+08	6.78575e+07	7.26416e+07	7.52358e+07
354	185.616	527.17	707391	502535	826161	1.58133e+06	1.12848e+06	1.74651e+06	1.78633e+06	472948	506641	1.18737e+06	0	0	0	112391	0	0	0	48693.3	123810	0	821165	793919	754560
355	298.473	411.106	1.26105e+06	1.83981e+06	1.93223e+06	1.35701e+06	1.95355e+06	2.01913e+06	2.34888e+06	869987	538947	967624	0	0	0	48850.7	42819.7	30877.2	0	33225	72927.6	0	1.31489e+06	1.08393e+06	1.45759e+06
356	191.341	417.152	2.0887e+06	201416	1.84057e+06	172645	1.05001e+06	476608	806297	131130	322337	1.06443e+06	794867	710089	268356	540005	754972	2.13479e+06	869350	1.11803e+06	2.503e+06	255717	1.44982e+06	1.22613e+06	1.00827e+06
357	348.41	171.065	5.48067e+06	3.50865e+06	6.25129e+06	4.47066e+06	5.14564e+06	4.59248e+06	2.58028e+06	4.62346e+06	3.35928e+06	4.17728e+06	5.08068e+06	4.45506e+06	4.08797e+06	2.72298e+06	3.20611e+06	5.13561e+06	2.93384e+06	3.94291e+06	7.84119e+06	4.88569e+06	1.68153e+06	2.50408e+06	2.33102e+06
358	217.024	453.152	242270	0	233488	0	67834.5	0	115335	30691.6	0	0	447064	248147	316008	3.7153e+06	499677	1.97575e+06	1.90936e+06	788884	1.22289e+06	971937	438337	393054	335046
359	280.565	743.276	4.22479e+06	108291	4.61814e+06	3.27318e+06	1.13163e+06	2.21451e+06	1.09968e+06	350203	944698	4.42105e+06	142292	0	0	0	0	0	0	0	0	0	1.86866e+06	1.32849e+06	1.5097e+06
360	180.066	321.074	5.82602e+06	1.84272e+07	2.19466e+07	2.40834e+07	9.56243e+06	1.41094e+07	1.38836e+07	4.19273e+06	8.73023e+06	7.95772e+06	334303	176508	210010	396650	618091	240577	348084	123086	440172	335242	8.21539e+06	8.66098e+06	8.33764e+06
361	243.263	469.192	657283	60909.8	3.55389e+06	403634	858461	1.27669e+06	975271	721738	183210	1.2871e+06	0	0	0	0	0	0	0	0	0	0	694275	507509	181367
362	79.8863	329.139	169405	132437	205762	0	438573	359449	163238	119645	253657	417686	2.51608e+06	3.52161e+07	4.06163e+07	2.76903e+07	3.74318e+07	2.37487e+07	6.9674e+06	3.57317e+07	1.65342e+07	9.41082e+06	1.13457e+07	1.13247e+07	1.17608e+07
363	186.031	661.408	1.09506e+06	1.34248e+06	1.2814e+06	1.93944e+06	1.22555e+06	962874	1.07318e+06	1.47844e+06	2.01023e+06	1.15225e+06	652899	479386	146292	723138	393242	240168	775996	682648	241001	461866	860580	1.42164e+06	860397
364	349.69	389.108	3.39264e+06	901568	2.09885e+06	1.11496e+06	2.84818e+06	2.3217e+06	1.91872e+06	1.96241e+06	1.34345e+06	1.65705e+06	197300	89977.2	105269	193965	175362	214700	70146.4	22793.5	192383	203578	1.24696e+06	1.31775e+06	1.18087e+06
365	223.548	302.15	1.37821e+06	0	1.02159e+06	616584	8.7471e+06	131904	1.14195e+06	370789	8.91036e+06	1.28768e+07	28358.2	220893	153378	67552.2	0	5.21999e+06	779633	3.76894e+06	679903	157806	2.9814e+06	3.1425e+06	2.85055e+06
366	475.891	519.156	127766	217537	1.84796e+06	1.19783e+06	406359	252599	10551.5	920881	478512	301696	659727	1.72905e+06	694185	111551	21694.4	1.97376e+06	133243	148146	1.02159e+06	1.42616e+06	1.1549e+06	1.19525e+06	998337
367	154.225	281.088	3.84874e+07	2.35195e+06	1.22228e+07	1.01959e+07	8.79883e+06	3.22618e+06	1.26334e+07	1.04572e+07	1.21059e+07	9.88984e+06	2.13328e+06	4.87376e+06	5.06558e+06	2.75662e+06	3.16034e+06	1.02373e+07	1.6839e+06	869857	6.35027e+06	3.23089e+06	9.11424e+06	8.41193e+06	7.1089e+06
368	279.901	295.14	1.06025e+06	1.45696e+06	1.71364e+06	931236	2.31855e+06	2.36371e+06	3.1553e+06	4.19794e+06	1.30234e+06	596640	3.49617e+06	7.23132e+06	4.99863e+06	7.17348e+06	3.70596e+06	1.63334e+06	3.84217e+06	1.6408e+06	9.94262e+06	5.69966e+06	4.3249e+06	3.97062e+06	4.06785e+06
369	217.028	481.172	3.41401e+07	1.57684e+07	3.89041e+07	1.44743e+07	2.29523e+07	2.66045e+07	2.64103e+07	1.94642e+07	1.5063e+07	1.34489e+07	275822	722891	74325.3	1.23972e+06	927611	103256	130007	290620	293644	0	1.38661e+07	1.29008e+07	1.31962e+07
370	214.587	188.092	6.91894e+06	2.231e+06	5.29035e+06	3.37172e+06	1.34487e+07	3.35886e+06	2.79032e+07	2.39842e+07	9.82211e+06	1.1612e+07	6.24403e+06	3.16568e+06	1.6612e+06	1.56983e+06	724905	2.65613e+07	1.43947e+06	7.83396e+06	5.5978e+06	3.03217e+06	8.2427e+06	8.25766e+06	9.08253e+06
371	140.026	461.181	1.46135e+06	990362	1.43472e+06	1.90077e+06	2.18234e+06	1.0061e+06	1.40899e+06	1.90548e+06	582070	0	0	0	0	469989	54442.4	0	0	0	0	185644	307743	379094	620619
372	214.05	425.181	0	0	0	0	0	0	0	0	0	0	258814	46938.6	329884	174628	449047	360606	388452	586888	425269	93850	119131	134503	109078
373	82.6712	269.175	4.84506e+06	5.50117e+06	1.46766e+06	1.09512e+06	972943	795464	3.18161e+06	2.56546e+06	1.61032e+06	1.36629e+06	8.35818e+06	6.4508e+06	4.81543e+06	6.19597e+06	7.54943e+06	4.60308e+06	1.96559e+07	8.46295e+06	8.73812e+06	4.02035e+06	4.05119e+06	4.06443e+06	4.24454e+06
374	90.3695	172.99	1.28391e+07	2.84264e+07	4.71268e+07	4.47954e+06	5.53569e+06	1.23172e+07	1.07488e+07	1.26728e+07	2.0727e+07	1.17301e+07	0	0	0	0	0	0	0	0	0	0	1.03e+07	1.13411e+07	1.12778e+07
375	200.539	202.108	1.84089e+07	7.19722e+06	2.86517e+07	1.30012e+07	6.66517e+07	1.70153e+07	1.35345e+08	1.22926e+08	1.04206e+08	5.99597e+07	2.84909e+07	3.00282e+07	1.54632e+07	9.58569e+06	2.26733e+06	1.84087e+08	1.11149e+07	3.4921e+07	2.85011e+07	6.66254e+06	5.30358e+07	4.53251e+07	4.93755e+07
376	33.8513	277.184	1.71529e+07	1.43271e+08	2.17686e+08	2.73991e+08	1.36133e+08	2.26592e+08	1.47988e+08	2.21091e+08	2.69866e+08	2.88721e+07	2.84126e+06	1.02747e+06	1.03818e+06	1.8566e+06	2.81011e+06	1.13752e+06	1.32031e+07	2.25918e+06	3.05192e+06	3.56862e+06	1.0881e+08	1.21024e+08	1.07835e+08
377	289.474	156.065	1.75964e+07	440931	601356	513304	169461	1.30525e+06	1.10554e+07	424133	672145	316778	211430	91901.4	144491	98461.6	200734	914092	150943	175693	1.98759e+06	248487	3.15845e+06	2.31312e+06	2.14687e+06
378	370.757	245.125	27831.8	0	252471	0	338796	0	718630	605269	0	522995	214959	57570.7	0	0	0	3.16696e+06	0	357395	208446	0	304779	356795	213095
379	294.88	536.235	4.59734e+06	158831	879006	234319	1.59608e+06	345704	1.65696e+06	1.02831e+06	2.83234e+06	8.81502e+06	0	0	0	0	0	0	0	47029.5	0	0	1.37082e+06	1.38667e+06	1.33707e+06
380	186.861	467.132	120621	0	156717	0	0	0	73960.9	0	0	0	77932.2	0	1.02258e+06	183482	520950	494939	857024	1.50694e+06	288484	0	339834	254502	281272
381	319.096	455.118	658604	1.77751e+06	4.53477e+06	1.86682e+06	2.64016e+06	1.80829e+06	1.79414e+06	1.56936e+06	994473	2.12145e+06	0	0	0	0	0	0	0	0	0	0	1.03718e+06	1.71658e+06	958000
382	167.381	764.522	0	289089	71254.4	2.31785e+06	1.48194e+06	0	256049	1.07357e+06	2.24367e+06	1.87125e+06	643823	661174	84621.2	0	104290	1.5414e+06	663423	1.7842e+06	395054	297858	782315	746939	803822
383	254.698	133.05	3.86484e+07	1.13272e+06	1.16586e+06	7.9748e+06	1.02995e+06	2.66649e+06	8.20135e+06	1.20646e+06	139210	1.08194e+06	587905	6.37091e+06	731373	760013	506920	264500	585619	772911	700240	343653	4.12628e+06	3.67588e+06	4.03382e+06
384	27.1017	417.194	0	0	0	0	0	0	0	0	1.05446e+06	0	3.28758e+06	1.34035e+07	6.7623e+07	5.42951e+07	9.51818e+06	8.3987e+06	1.12629e+07	1.12468e+06	1.40109e+07	4.42158e+07	0	3.87049e+06	3.68524e+06
385	28.7802	297.153	1.35989e+09	1.22754e+09	1.42777e+09	1.12939e+09	9.97751e+08	1.38517e+09	1.32963e+09	1.15472e+09	7.27027e+08	7.71288e+08	1.02409e+08	1.09632e+08	1.35778e+08	3.33329e+08	1.49471e+08	1.56177e+08	1.28107e+08	1.07021e+08	1.54871e+08	1.66534e+08	8.00307e+08	7.56003e+08	7.95927e+08
386	108.556	381.192	677418	1.08483e+06	540669	253583	356626	923543	747606	434468	1.20195e+06	497341	333461	217922	130557	386908	512806	222564	884649	195572	174375	262163	694808	838488	425465
387	70.8902	343.118	0	0	404606	0	283052	1.88285e+06	134590	0	0	0	8.70646e+06	1.14021e+08	6.86653e+06	1.14409e+07	2.85861e+07	6.10846e+06	1.15884e+07	6.31065e+07	5.32987e+06	2.71776e+06	1.43237e+07	1.50134e+07	1.4913e+07
388	165.631	790.538	0	1.54158e+06	525653	1.28591e+06	1.03997e+06	0	0	136820	1.48687e+06	1.11027e+06	346459	406178	394562	57719.2	273132	1.40436e+06	490295	1.34428e+06	562458	215191	590238	591005	571822
389	127.756	385.114	2.56068e+07	1.22158e+07	8.19785e+07	4.86176e+07	1.10283e+08	6.01432e+07	3.121e+07	7.85037e+07	2.56658e+07	6.95304e+07	0	0	0	0	60048.7	0	0	0	0	0	3.18241e+07	3.38689e+07	3.24203e+07
390	156.032	353.087	1.02081e+06	553080	3.84776e+06	841121	792224	357766	1.31098e+06	2.02941e+06	1.32708e+06	216192	0	66575.8	0	152555	157268	480841	0	0	106723	330796	915822	813169	638527
391	26.8107	207.069	1.17163e+07	1.9583e+08	9.82492e+07	2.54605e+08	1.95033e+08	2.41968e+07	1.42234e+08	2.79065e+07	8.57677e+07	1.08853e+08	1.32504e+06	3.6939e+06	2.06131e+06	4.49399e+06	3.85964e+07	2.4765e+07	3.4827e+07	0	6.44715e+06	2.47617e+07	7.57421e+07	7.2363e+07	7.32751e+07
392	353.632	459.186	832326	32517.3	837601	115143	263207	345685	386967	332517	137542	582819	29830.3	17135.3	0	0	34787.3	13297.8	43157.8	23383.8	0	13014.8	245363	282998	281068
393	344.376	387.129	1.28447e+06	597986	359764	598405	422630	385917	848838	187966	153170	235758	0	47215.9	0	0	0	0	0	34892.7	0	0	355678	277658	261051
394	309.173	457.17	2.89344e+06	717559	5.40465e+06	1.39512e+06	2.01482e+06	2.60126e+06	2.68943e+06	3.98293e+06	904073	3.53556e+06	35193.5	0	145758	127506	287961	130368	188057	0	484587	224251	2.1221e+06	1.90105e+06	1.85762e+06
395	186.044	311.14	4.68524e+06	147304	473502	2.61843e+06	4.24288e+06	154557	349531	0	3.39015e+06	5.61165e+06	255366	787376	24491.3	86948.7	298559	3.19518e+06	154055	1.59697e+06	905265	55211.1	1.60472e+06	1.60866e+06	1.46443e+06
396	194.375	453.139	1.22515e+07	1.92446e+06	5.5275e+06	1.87052e+06	3.66519e+06	4.92295e+06	4.17716e+06	4.50703e+06	4.99438e+06	5.22667e+06	833709	1.15021e+06	485704	1.39087e+06	1.13529e+06	2.25838e+06	1.39838e+06	1.63705e+06	2.38416e+06	752189	3.64957e+06	3.06647e+06	2.91547e+06
397	23.7625	347.226	7.96048e+06	1.19576e+07	1.0371e+07	1.11368e+07	7.33609e+06	1.08326e+07	1.14211e+07	1.30291e+07	2.22045e+06	2.07685e+06	2.33457e+06	72380.3	53652.6	210917	1.19106e+07	2.96647e+06	6.49336e+06	3.90694e+06	136829	0	7.49828e+06	6.00917e+06	8.14802e+06
398	86.2245	194.048	2.55157e+08	944531	483534	2.49096e+06	4.15954e+06	1.2412e+06	1.85574e+07	378368	1.72208e+06	475498	0	97302.6	0	153780	0	0	0	250436	0	120442	1.63488e+07	1.66349e+07	1.64201e+07
399	172.413	343.212	0	0	0	0	0	0	0	490516	0	0	3.90731e+06	4.42161e+06	4.36292e+06	1.17732e+07	8.71067e+06	3.23258e+06	6.52005e+06	3.86237e+06	7.70868e+06	3.09857e+06	636005	419485	1.2048e+06
400	199.422	465.102	1.46046e+06	933616	1.40512e+07	1.58721e+06	1.73447e+06	2.94028e+06	4.07311e+06	2.33314e+06	916022	2.76229e+06	3.99764e+06	3.19092e+06	2.82445e+06	1.18248e+06	1.78889e+07	6.12199e+06	5.93252e+06	1.72204e+06	3.31802e+06	1.74692e+06	3.81196e+06	3.75903e+06	3.36358e+06
401	153.497	259.013	1.75934e+08	7.51208e+07	2.66171e+08	2.04591e+08	2.8637e+08	5.61966e+07	1.69373e+08	8.85786e+07	2.4706e+08	1.13236e+08	0	156559	0	137866	73902.9	0	0	0	0	0	9.55018e+07	1.05492e+08	1.03921e+08
402	27.6185	339.2	2.65995e+09	2.77063e+09	2.59019e+09	2.58961e+09	1.83457e+09	2.79413e+09	2.49344e+09	2.10127e+09	1.67478e+09	2.42545e+09	1.48228e+09	4.1638e+08	5.29955e+08	1.00886e+09	2.32941e+09	1.55093e+09	2.24104e+09	1.82942e+09	6.94515e+08	7.33788e+08	1.96668e+09	1.99125e+09	2.05076e+09
403	232.776	489.162	200574	433348	1.24497e+06	202867	442556	879133	231792	228166	0	1.28249e+06	1.90714e+06	3.85636e+06	139364	215615	2.55475e+06	268594	2.24917e+06	1.51723e+07	185930	30980.9	1.33423e+06	757442	1.02226e+06
404	182.732	457.22	4.02582e+06	1.82683e+06	3.54761e+06	926626	1.86352e+06	2.32257e+06	1.4658e+06	1.58623e+06	565340	1.00405e+06	445425	335611	134328	385989	293795	164826	238173	223462	177543	74821.2	470920	1.30845e+06	1.01676e+06
405	194.619	451.137	1.16581e+06	111496	299747	0	0	0	174280	0	31876.8	415598	2.61577e+06	4.23803e+06	1.31582e+06	4.78338e+06	4.30743e+06	7.40724e+06	4.51541e+06	5.78773e+06	8.21478e+06	1.89254e+06	2.11719e+06	2.06198e+06	2.0398e+06
406	58.5564	267.196	402108	4.07968e+06	160671	0	386213	1.1523e+06	0	2.64816e+06	0	0	7.08555e+06	1.23e+07	1.18364e+07	9.92043e+06	7.663e+06	9.59855e+06	9.48966e+06	8.49404e+06	1.19748e+07	1.24566e+07	1.12251e+06	1.52197e+06	546747
407	26.7026	373.169	0	0	1.1624e+06	0	0	0	0	0	0	0	3.871e+06	2.02611e+07	1.10553e+08	9.82369e+07	1.88105e+07	9.26456e+06	1.88541e+07	6.35247e+06	2.23464e+07	6.84621e+07	6.28127e+06	8.09344e+06	6.28002e+06
408	205.8	437.158	0	0	0	0	0	0	93616.5	0	42445.2	86132.5	925087	1.93243e+06	478984	6.83174e+06	608739	1.33209e+06	421677	253782	1.50925e+06	723777	659888	595602	580659
409	262.117	664.42	0	682651	166557	157810	155247	440794	380929	94972.5	0	0	1.66714e+06	1.39021e+06	1.44843e+06	1.75557e+06	1.22335e+06	1.76396e+06	841022	1.19114e+06	1.93414e+06	718848	647533	678737	645043
410	234.834	341.197	26915.1	23904.1	0	0	48741.1	64395.9	0	0	0	205600	1.4193e+06	1.93237e+06	1.49332e+06	2.21769e+06	1.13299e+06	1.33837e+06	1.11067e+06	1.7649e+06	2.90169e+06	1.32428e+06	655634	775310	512784
411	28.5022	311.168	3.94058e+09	3.76693e+09	4.07126e+09	3.40464e+09	2.79945e+09	3.87612e+09	3.88959e+09	3.23406e+09	2.15434e+09	2.32082e+09	6.62652e+08	3.88991e+08	4.95521e+08	1.10193e+09	8.95847e+08	7.82666e+08	8.66652e+08	6.88711e+08	5.5205e+08	6.58759e+08	2.40746e+09	2.40561e+09	2.55127e+09
412	187.399	189.055	1.26171e+07	1.01397e+07	7.27313e+06	4.86884e+06	1.8405e+06	8.72725e+06	3.92443e+06	6.88334e+06	4.4687e+06	4.35461e+06	2.42538e+06	2.79107e+06	871547	1.70284e+06	1.88401e+06	2.21917e+06	679429	1.34938e+06	1.79297e+06	1.56739e+06	3.95041e+06	3.46837e+06	3.7997e+06
413	290.783	447.223	0	0	0	0	0	0	0	0	0	0	338131	1.81593e+06	197074	0	0	1.0268e+06	22929.9	761030	1.3643e+06	0	207921	208645	298624
414	28.0306	275.057	584818	4.18199e+07	1.85513e+08	0	1.01255e+07	2.00729e+07	6.85881e+06	9.26783e+06	1.12244e+07	1.01735e+07	0	1.96393e+06	671901	0	0	166928	179131	2.46367e+06	0	0	4.74877e+06	7.1826e+06	8.85074e+06
415	118.012	567.171	2.64033e+06	202019	658104	614756	2.58053e+06	1.39059e+06	3.94797e+06	1.03354e+06	2.40785e+06	4.2011e+06	472235	0	361119	1.4659e+06	145321	112838	258489	0	79124.4	4.40211e+06	1.45223e+06	1.08635e+06	1.07939e+06
416	261.663	522.283	200184	2.42991e+06	1.88193e+07	1.69644e+07	2.19615e+07	223476	595683	7.03859e+06	9.93089e+06	1.73787e+07	268539	5.12425e+06	333552	0	32580.1	2.63805e+07	408147	1.50487e+06	7.21577e+06	432521	7.81729e+06	8.66805e+06	9.34397e+06
417	157.142	613.213	653186	2.42944e+06	1.45345e+06	1.55874e+06	861841	408367	1.63566e+06	244592	4.21085e+06	544972	31349	82278.6	63078.3	38625.3	0	0	150927	0	103674	38343.9	512984	802027	533554
418	32.9393	341.179	4.17948e+07	4.49087e+06	8.87189e+06	8.17231e+06	7.43868e+06	1.13507e+07	3.29257e+06	3.78065e+06	1.07662e+06	4.21164e+06	2.8185e+06	1.58172e+06	1.1774e+06	2.46661e+06	3.98001e+06	1.88047e+06	3.94743e+06	3.91693e+06	2.21779e+06	1.55139e+06	4.77177e+06	5.69728e+06	5.6485e+06
419	272.18	367.105	1.14551e+06	7.12145e+06	9.5038e+06	4.84872e+06	3.60812e+06	4.41502e+06	3.21476e+06	4.29569e+06	2.17929e+06	3.36259e+06	4.38307e+06	1.22516e+06	5.46109e+06	8.06509e+06	9.44218e+06	1.78937e+06	3.29486e+06	2.72603e+06	4.24691e+06	3.86553e+06	3.37014e+06	2.97195e+06	3.74097e+06
420	298.363	506.224	978169	87732.5	329984	204919	933353	170665	1.01718e+06	121000	540084	1.60826e+06	0	0	0	0	0	0	0	0	0	0	546196	477598	509283
421	135.603	195.029	8.42121e+07	4.74937e+07	4.30721e+07	3.99399e+07	3.40099e+07	4.57121e+07	4.56937e+07	2.72687e+07	1.71844e+07	1.76951e+07	1.00855e+08	6.2257e+07	6.89287e+07	1.45641e+08	9.62538e+07	7.02282e+07	6.26238e+07	7.35796e+07	7.14684e+07	6.1539e+07	2.60517e+07	6.23111e+07	6.08934e+07
422	271.25	487.254	0	0	0	0	0	30790.6	0	0	0	0	4.61599e+06	4.77212e+06	4.69866e+06	6.2604e+06	7.39893e+06	6.0963e+06	3.74306e+06	6.78376e+06	1.16965e+07	2.58561e+06	3.42716e+06	3.09135e+06	2.55014e+06
423	208.447	593.261	0	0	0	0	0	0	0	0	0	0	1.07257e+07	2.13536e+06	1.11637e+07	2.95012e+07	1.85278e+07	6.73657e+06	1.53382e+07	1.19659e+07	6.63539e+06	1.56077e+06	4.81514e+06	4.09443e+06	4.78712e+06
424	230.577	445.134	371010	585899	326266	961794	509271	286030	879184	242138	423703	251774	0	52511.1	0	0	132381	46872.4	0	0	29045.7	0	227719	286999	235996
425	71.6879	357.079	1.73071e+06	3.98725e+06	5.20848e+06	911838	2.18561e+06	4.50404e+06	444512	2.91101e+06	7.10226e+06	5.25009e+06	106702	250337	0	0	455177	0	84609.2	0	0	98500.3	1.96728e+06	2.61018e+06	2.22058e+06
426	25.7974	265.147	2.39163e+08	2.31832e+08	1.82925e+08	1.625e+08	1.11172e+08	2.14059e+08	2.02095e+08	1.71898e+08	1.00012e+08	1.48496e+08	6.87927e+07	1.65546e+08	1.5296e+08	3.27749e+08	2.49068e+08	9.96819e+07	1.72917e+08	1.28475e+08	3.04273e+08	1.29527e+08	1.66341e+08	1.71838e+08	1.86265e+08
427	196.089	483.164	126364	0	0	0	0	0	0	0	0	0	863229	2.86913e+06	230130	9.553e+06	1.04398e+06	6.85456e+06	6.0654e+06	432782	1.10579e+06	789425	1.34393e+06	910045	791906
428	188.05	409.09	1.88783e+06	940864	319027	1.55351e+06	1.70417e+06	551209	1.47889e+06	1.16278e+06	1.39788e+06	1.4076e+06	0	0	0	57899.5	0	0	0	103797	49043.3	0	955193	789923	422766
429	143.615	581.187	2.26692e+06	7.66343e+06	6.06133e+06	2.28829e+06	1.49663e+06	1.56998e+06	2.1937e+06	1.83268e+06	1.81134e+06	2.39486e+06	9.87918e+06	617888	1.85385e+06	4.72835e+06	8.01898e+06	5.03203e+06	4.93235e+06	732251	4.79175e+06	5.45262e+06	2.5593e+06	2.93849e+06	2.23555e+06
430	270.264	565.155	1.6078e+06	340280	4.40255e+06	800702	1.52893e+06	1.52804e+06	1.59051e+06	1.17635e+06	848526	896804	0	0	0	0	0	0	0	0	0	0	1.01031e+06	848327	1.07849e+06
431	179.465	723.477	2.13493e+06	2.20814e+06	1.38439e+06	2.51233e+06	867667	162935	0	174964	777976	315580	196985	0	82151.8	25838.5	767028	1.49846e+06	311044	425609	140120	0	595876	511254	639371
432	292.87	152.995	3.05828e+06	3.08827e+06	542430	551610	1.23698e+07	2.09375e+06	2.89322e+06	2.3659e+06	5.09553e+07	5.39348e+07	1.27901e+06	2.27175e+07	1.32409e+07	1.16474e+06	667925	695754	7.73391e+06	2.32938e+06	2.43906e+06	1.63986e+06	1.07685e+07	1.05162e+07	1.05253e+07
433	216.457	524.278	0	895862	362930	529051	831279	0	2.4557e+06	329437	4.57543e+06	2.70956e+06	0	2.38158e+06	794471	0	0	1.05401e+06	1.45431e+06	2.26329e+06	323568	0	965438	796850	898264
434	206.25	321.155	1.03722e+06	34456.9	215001	0	0	121535	0	146436	42299.6	0	2.52711e+06	4.12201e+06	2.03459e+06	978034	643382	3.8787e+06	814966	2.76895e+06	5.44884e+06	1.31244e+06	1.51719e+06	1.23035e+06	1.16403e+06
435	300.264	389.193	0	0	0	0	0	0	40904	0	48221.3	274764	0	0	0	0	0	76921	0	0	0	0	401590	317056	265739
436	23.4563	246.991	6.75434e+06	4.86161e+07	3.35881e+07	1.14384e+07	7.30477e+06	1.2622e+07	781143	3.70979e+07	3.49855e+07	8.24705e+06	1.67737e+06	0	0	0	21416.3	267480	0	2.27817e+06	163607	1.24105e+06	1.36e+07	1.40418e+07	1.40202e+07
437	229.422	567.208	1.13968e+06	993560	2.17192e+06	1.13838e+06	1.25021e+06	611432	1.60493e+06	572509	2.38778e+06	2.06726e+06	0	0	0	0	0	25331.4	20260.2	0	0	0	907197	708201	930042
438	24.1303	365.236	8.98259e+06	9.78989e+06	7.46204e+06	9.00467e+06	2.55725e+06	1.01916e+07	3.28705e+06	7.35825e+06	5.98075e+06	2.59119e+06	230923	200663	307963	942216	615247	472517	482878	1.13104e+06	1.03267e+06	0	3.1833e+06	3.94661e+06	4.81838e+06
439	420.049	241.011	83097.3	431029	452596	387319	1.49594e+06	139651	293234	786337	923340	1.41354e+06	86647.5	352719	41788.3	0	14419.6	1.24736e+06	75415	643488	380274	60509.8	560975	610015	568239
440	53.3524	309.206	251243	1.88272e+06	4.61588e+06	5.14464e+06	3.12373e+06	6.54172e+06	2.24245e+06	7.1334e+06	968597	1.21364e+06	1.47554e+07	1.68543e+07	1.95576e+07	3.57767e+07	2.05574e+07	1.27687e+07	1.74604e+07	1.03725e+07	2.57265e+07	2.34045e+07	9.2867e+06	8.93362e+06	9.42072e+06
441	167.647	431.155	206575	356684	1.47292e+06	446006	606546	934171	0	1.82634e+06	114299	158306	684843	480276	2.73459e+06	2.64987e+06	934984	601522	1.00805e+06	567946	2.18136e+06	985214	595401	559945	758655
442	123.211	495.151	4.84173e+06	1.52102e+06	4.81635e+06	2.05468e+06	3.63945e+06	5.36269e+06	5.51937e+06	2.9843e+06	2.58066e+06	3.31645e+06	9.49783e+06	2.354e+06	950736	1.18313e+07	4.64811e+06	4.24976e+06	5.98396e+06	4.68013e+06	5.21767e+06	1.04173e+07	5.11509e+06	4.5882e+06	4.7764e+06
443	69.9553	621.181	2.7775e+06	0	1.35989e+06	158171	539323	1.59968e+06	1.39707e+06	1.40762e+06	175615	3.6526e+06	80660.3	0	48609.5	0	50831.6	0	0	0	0	107390	827594	441509	564825
444	173.732	714.507	3.40713e+06	6.04862e+06	6.53595e+06	1.35703e+07	9.99717e+06	858959	3.68998e+06	1.25257e+07	1.66911e+07	6.67106e+06	3.01205e+06	8.40726e+06	3.13708e+06	709233	957939	6.05617e+06	4.84422e+06	6.67505e+06	5.37179e+06	2.44751e+06	7.79719e+06	7.24885e+06	6.63421e+06
445	275.461	188.092	1.22307e+09	735589	5.23229e+06	3.3239e+06	6.95373e+06	2.36331e+08	4.45563e+08	1.68375e+06	3.60424e+06	1.25789e+07	260757	3.27746e+06	221310	291604	272721	1.05567e+07	535689	2.2587e+06	1.7793e+06	436851	2.5019e+08	2.36516e+08	2.40258e+08
446	385.428	164.038	1.75097e+06	1.00311e+06	2.97428e+06	1.32265e+06	1.58123e+07	860596	3.42748e+06	3.40281e+06	3.62022e+07	1.31751e+08	439136	2.76075e+07	996431	13394	0	5.59608e+06	912775	1.80047e+06	1.23989e+06	365092	1.25841e+07	1.33451e+07	1.4739e+07
447	343.246	367.124	7.16288e+06	932586	1.05013e+07	2.13496e+06	2.01809e+06	2.45412e+06	2.38386e+06	3.05426e+06	2.47676e+06	4.75464e+06	0	0	0	0	0	0	0	0	0	0	3.06309e+06	2.52824e+06	2.30286e+06
448	36.7412	747.516	1.04517e+06	1.08292e+06	2.38451e+06	4.3698e+06	6.26751e+06	644406	0	422551	7.4762e+06	1.01546e+07	3.38937e+06	7.06095e+06	2.85565e+06	1.398e+06	1.52068e+06	3.34231e+06	2.08701e+06	5.85962e+06	1.60169e+06	1.38881e+06	2.87619e+06	4.56638e+06	2.5672e+06
449	152.532	127.039	1.36761e+06	1.24873e+06	4.2872e+06	1.28343e+06	4.50689e+06	1.42618e+06	3.12062e+06	2.148e+06	1.28009e+06	451256	2.82435e+07	1.86426e+07	2.87579e+07	7.80926e+07	6.07581e+07	2.03781e+07	3.62195e+07	2.80305e+07	2.64679e+07	2.45263e+07	1.43585e+07	1.27173e+07	1.18701e+07
450	350.4	415.231	85897.2	0	179876	0	487470	107694	82431.6	31048.3	2.95495e+06	1.13192e+06	0	3.04254e+06	56412.7	0	0	540640	153426	629271	147908	11410.4	685194	608990	565955
451	245.143	187.041	1.00569e+07	1.51338e+07	3.03906e+07	1.68681e+07	6.24703e+07	3.88284e+07	3.50106e+07	6.02165e+07	3.09639e+07	2.36176e+07	5.84061e+07	5.55598e+07	3.35555e+07	3.04512e+07	2.03614e+07	4.74639e+07	4.27705e+07	4.86228e+07	3.82469e+07	2.77274e+07	2.97488e+07	4.03461e+07	4.39077e+07
452	126.066	327.124	175299	1.17866e+06	1.81009e+06	2.04718e+06	1.45747e+06	3.94793e+06	0	985915	2.69901e+06	6.15976e+06	7.34757e+06	117506	2.29448e+06	3.67862e+07	9.01862e+06	2.54297e+06	8.68436e+06	2.41669e+06	4.34811e+06	4.88028e+06	2.44679e+06	2.30286e+06	1.99823e+06
453	95.4837	309.206	5.51126e+06	2.94121e+06	3.02588e+06	2.90177e+06	1.35717e+06	1.08311e+07	8.74497e+06	3.40554e+06	1.63295e+06	1.94517e+06	1.4034e+06	3.6379e+06	1.6255e+06	2.69324e+06	2.62297e+06	1.4398e+06	1.63174e+06	2.32015e+06	2.83355e+06	2.60583e+06	2.94965e+06	3.46569e+06	3.54714e+06
454	184.748	463.138	1.47026e+06	8.4479e+06	2.41427e+06	2.61473e+06	2.28052e+06	507250	2.02194e+06	336040	5.2917e+06	5.08502e+06	124685	31912.5	0	0	0	0	0	0	0	0	2.01332e+06	1.55625e+06	1.44109e+06
455	25.1967	337.205	1.55492e+07	2.39101e+07	1.244e+07	1.84342e+07	5.95958e+06	1.17853e+07	3.11407e+07	2.64157e+07	1.6241e+07	2.57963e+07	2.11209e+06	1.0543e+07	1.02612e+07	2.91977e+07	1.34542e+07	4.89583e+06	7.33119e+06	8.80579e+06	2.85597e+07	9.55747e+06	1.07667e+07	7.37427e+06	2.93935e+07
456	141.804	579.207	9.23096e+06	1.53374e+07	5.33918e+06	9.46482e+06	1.23743e+07	5.62595e+06	1.03887e+07	1.20424e+07	5.43865e+06	1.26162e+06	1.30387e+08	1.85519e+07	3.53912e+07	7.05348e+07	1.09373e+08	7.43952e+07	6.39121e+07	1.82733e+07	7.61215e+07	7.98024e+07	3.09036e+07	2.96899e+07	3.08368e+07
457	185.89	240.124	0	463131	0	0	0	188832	233567	0	0	0	9.82255e+06	2.82919e+06	481310	62138.2	1.10161e+07	2.48664e+06	2.46668e+06	5.1946e+06	8.75993e+06	45973.4	1.98144e+06	2.24189e+06	2.15206e+06
458	77.987	507.187	1.75269e+07	3.18801e+06	9.44194e+06	2.20942e+06	5.00778e+06	3.7698e+06	1.09218e+07	4.09935e+06	1.62477e+06	9.74848e+06	1.12993e+07	1.06792e+07	2.16423e+07	1.29801e+06	8.01959e+06	6.96395e+06	1.67274e+07	1.30703e+07	3.97745e+06	9.09859e+06	4.3986e+06	3.70991e+06	4.52619e+06
459	228.658	637.177	451931	613641	327891	237536	797069	991195	261021	886571	241329	426468	19361.8	0	0	29218.1	20622.2	0	0	31006.5	0	0	222819	282239	255356
460	141.016	341.27	139329	2.00123e+06	789325	5.84594e+06	585285	963489	1.96491e+06	2.94077e+06	698983	0	0	0	0	0	0	0	0	0	0	0	539620	408197	742653
461	194.849	327.108	1.58517e+08	4.06951e+08	3.98551e+08	5.29369e+08	3.14545e+08	3.06222e+08	5.42754e+08	8.42791e+07	3.13851e+08	2.61484e+08	0	0	0	416278	0	238659	0	84319.8	229492	0	2.28172e+08	2.16669e+08	2.11272e+08
462	99.1223	299.186	71134.2	731018	312318	281443	107051	782569	1.06569e+06	681538	52632.3	0	2.70557e+06	4.71927e+06	2.24979e+06	4.21063e+06	4.3343e+06	2.95926e+06	2.81677e+06	3.16627e+06	4.08792e+06	2.73128e+06	2.75122e+06	2.57552e+06	3.52582e+06
463	184.826	571.312	0	0	0	0	0	0	0	0	0	0	1.47565e+06	2.19225e+06	940700	2.79111e+06	894474	1.83855e+06	1.0543e+06	2.1956e+06	1.21698e+06	287509	473547	414052	317870
464	188.478	433.113	81595.2	283920	308524	373483	572826	97920	159125	0	161922	321698	293754	805435	306161	217501	2.187e+06	532330	1.88123e+06	37897.7	229415	576943	278362	325726	315218
465	158.806	804.592	0	128224	542753	4.72213e+06	4.45476e+06	0	1.01332e+06	0	1.13711e+06	6.98349e+06	478957	53038.6	220402	0	914636	4.06043e+06	827648	4.68e+06	972271	796555	1.60507e+06	1.58426e+06	1.37911e+06
466	209.167	597.218	1.93624e+06	943341	1.95045e+06	752554	617159	1.14841e+06	1.43246e+06	696329	355823	207554	0	0	0	29067.8	0	0	0	0	0	0	355099	545360	460787
467	66.2185	395.21	496942	1.0916e+06	374314	826401	465508	1.55237e+06	733583	1.54607e+06	397830	132930	552486	6.54503e+06	3.4597e+06	5.68544e+06	833807	744037	992837	676947	6.19291e+06	4.26037e+06	1.80792e+06	3.62345e+06	2.12023e+06
468	25.2682	309.174	4.86678e+07	4.3973e+07	2.81573e+07	2.95359e+07	1.70889e+07	3.72243e+07	3.58176e+07	3.0449e+07	2.03499e+07	3.91795e+07	8.29328e+06	3.67069e+07	2.66336e+07	6.74902e+07	2.64075e+07	1.08072e+07	1.19669e+07	2.97605e+07	9.65827e+07	2.52331e+07	2.78414e+07	2.95108e+07	3.07037e+07
469	202.831	303.217	61866.7	199824	42775.8	0	95503.7	936699	683659	77440.9	181702	248695	727946	557681	607159	625585	213293	309449	609393	997502	778873	178687	198174	179878	86033
470	112.993	537.161	2.39785e+06	1.34579e+06	2.19792e+06	1.75543e+06	3.32753e+06	3.45631e+06	4.22232e+06	1.48583e+06	2.58428e+06	2.73484e+06	2.87039e+06	362496	4.53951e+06	1.13175e+07	2.22648e+06	2.33129e+06	2.73479e+06	1.86895e+06	4.45096e+06	5.46158e+06	2.40178e+06	2.91975e+06	2.8316e+06
471	219.384	885.55	2.97107e+06	1.29491e+06	3.76871e+06	1.32589e+07	1.44743e+07	2.1112e+06	768513	88811.4	8.6282e+06	2.41779e+07	3.14182e+06	641001	2.51693e+06	933062	6.00539e+06	1.513e+07	3.04929e+06	1.4418e+07	5.50028e+06	3.32798e+06	6.39637e+06	6.20587e+06	6.69673e+06
472	219.76	301.107	2.41418e+06	772918	2.84706e+06	594695	1.32287e+06	1.92274e+06	1.31198e+06	1.79157e+06	974593	852757	0	70591.6	40775.5	0	0	0	40623.1	0	94356.3	155115	855997	889270	991479
473	24.8776	321.21	2.7054e+07	3.93411e+07	2.77129e+07	3.02403e+07	1.95242e+07	3.42767e+07	2.35363e+07	3.30853e+07	9.56291e+06	6.62454e+06	1.87492e+07	1.22931e+07	1.84048e+07	2.46859e+07	6.54631e+07	2.2342e+07	6.30954e+07	2.73805e+07	1.71497e+07	1.66591e+07	1.86172e+07	2.45514e+07	2.78556e+07
474	86.8525	155.034	4.40456e+06	5.86408e+06	4.99408e+06	4.98875e+06	5.21444e+06	4.95182e+06	4.28655e+06	5.38827e+06	5.44656e+06	5.55927e+06	2.40183e+07	1.48153e+07	9.5023e+06	5.03728e+06	1.57997e+07	2.74144e+07	4.92928e+06	1.76001e+07	1.06738e+07	9.90902e+06	6.68694e+06	5.51584e+06	7.61068e+06
475	310.07	445.206	39657.9	0	0	0	0	0	0	0	0	77711.4	2.5142e+06	3.00564e+06	1.38725e+06	1.42526e+06	1.4559e+06	3.09603e+06	1.04515e+06	3.37346e+06	4.97823e+06	1.0122e+06	969970	1.04552e+06	871716
476	119.236	509.166	1.36623e+06	85515.6	324825	463137	946502	324564	798886	290559	528286	1.8439e+06	1.97793e+06	1.31006e+06	1.58492e+06	2.33395e+06	1.71704e+06	2.14091e+06	1.75831e+06	886675	647649	3.34173e+06	957258	1.9917e+06	919728
477	391.751	313.113	1.28121e+07	915129	3.25842e+06	1.06957e+06	2.14259e+06	3.11759e+06	1.60127e+06	1.10372e+06	1.99973e+06	4.837e+06	81086.1	1.04141e+06	53040.9	0	18188.1	2.60389e+06	28651.4	560290	355245	113397	4.45969e+06	1.76764e+06	1.59777e+06
478	219.76	511.181	1.16765e+07	3.4706e+06	1.23303e+07	3.79271e+06	5.36397e+06	7.69003e+06	7.12354e+06	7.09118e+06	4.23005e+06	5.40499e+06	39876.7	90973	0	663910	226912	0	157664	25890.9	289622	0	4.02038e+06	4.27933e+06	4.21355e+06
479	210.539	593.146	352734	0	1.26866e+06	0	339700	268499	596835	439003	103800	5.46426e+06	0	40637.6	0	0	0	0	0	0	0	41933.5	396694	254912	459512
480	24.125	391.251	5.38996e+06	8.60106e+06	3.01083e+06	6.33483e+06	1.79841e+06	5.86367e+06	7.41497e+06	5.22357e+06	2.254e+06	2.56591e+06	0	0	38396.4	79441.6	59639.2	37189.2	95554.1	0	104697	62777.6	1.97508e+06	3.16368e+06	3.5344e+06
481	235.881	186.113	1.88188e+06	2.39866e+06	1.05239e+06	1.46335e+06	1.21118e+06	1.39008e+06	1.26521e+06	1.4992e+06	2.79739e+06	2.08572e+06	3.91886e+06	3.56059e+06	3.03171e+06	3.87266e+06	2.95347e+06	3.36835e+06	3.69976e+06	2.87061e+06	5.60329e+06	3.99327e+06	2.90683e+06	3.06457e+06	2.5239e+06
482	221.839	365.1	393333	268890	1.56212e+06	254088	688511	297294	799713	173614	108809	1.04535e+06	0	106090	0	0	0	42104.3	0	0	0	39928.2	431065	182999	254709
483	406.275	138.97	1.02372e+07	3.48335e+06	3.9906e+07	1.33822e+06	2.8725e+06	4.40045e+06	2.54311e+06	7.80867e+06	6.26689e+06	4.33569e+06	520684	1.46089e+06	588933	256285	163739	355538	525283	250954	419363	78173.4	2.88583e+06	3.37744e+06	2.2853e+06
484	157.809	509.165	8.52748e+06	1.00938e+06	8.11329e+06	617053	2.11585e+06	5.10783e+06	5.14399e+06	1.46192e+06	1.90297e+06	5.30518e+06	0	85270.2	466228	962705	396403	0	637354	0	473093	236615	2.34339e+06	2.54241e+06	3.49815e+06
485	391.682	457.167	234373	42799	590487	89175.2	321422	32920.1	22449.6	140594	472686	522088	30964	182907	10796.4	0	0	1.28365e+06	0	156737	182283	0	381418	458267	362313
486	287.481	351.129	1.47027e+07	7.25451e+06	2.04053e+07	1.41874e+07	1.01619e+07	7.64698e+06	7.64107e+06	1.27363e+07	1.62674e+07	2.55686e+07	633048	1.35993e+06	863753	0	6.19675e+06	0	492522	0	801490	1.01788e+06	9.78395e+06	9.15185e+06	9.24596e+06
487	361.998	273.059	1.90478e+06	392944	1.71995e+06	417126	3.1442e+06	1.44114e+06	340634	649564	2.00935e+06	1.01956e+07	0	0	917481	0	0	480244	93610.4	0	0	0	1.83754e+06	167513	1.39259e+06
488	166.928	766.54	399456	1.33015e+06	2.67854e+06	8.73814e+06	7.03392e+06	0	0	1.56613e+06	1.05737e+07	1.00343e+07	2.29826e+06	4.01199e+06	1.9582e+06	684626	2.725e+06	9.63014e+06	3.06758e+06	8.04022e+06	4.65639e+06	2.02336e+06	4.92747e+06	4.28356e+06	4.50135e+06
489	408.508	377.085	3.08044e+06	3.0735e+06	5.00584e+06	4.94456e+06	3.36932e+06	4.07888e+06	7.14054e+06	2.44518e+06	708283	1.15181e+06	7.52743e+06	3.25917e+06	5.71604e+06	3.93026e+06	5.33062e+06	3.46907e+06	4.02354e+06	5.95786e+06	4.84949e+06	5.41512e+06	3.38625e+06	2.74986e+06	4.68653e+06
490	128.459	461.218	0	0	0	0	0	0	0	0	0	0	1.21184e+07	633801	1.65468e+07	2.4092e+07	4.08215e+06	3.30516e+06	7.50526e+06	996208	7.37499e+06	9.90552e+06	3.444e+06	3.57272e+06	3.23922e+06
491	157.008	359.098	1.51922e+07	1.87787e+07	3.91767e+07	1.79426e+07	1.37701e+07	1.15777e+07	2.65331e+07	1.51428e+07	2.28886e+07	2.23889e+07	1.43111e+07	1.48107e+07	1.72917e+07	1.0882e+07	2.65107e+07	8.86418e+06	9.67784e+06	1.04698e+07	1.4898e+07	2.26281e+07	1.74386e+07	1.64951e+07	1.75499e+07
492	66.4427	317.066	0	0	0	0	0	0	0	0	0	0	1.31626e+07	2.56891e+07	1.45424e+07	1.50008e+07	3.60281e+07	2.03424e+07	8.38022e+06	8.6517e+06	1.28418e+07	1.53168e+07	6.75501e+06	6.64424e+06	5.14576e+06
493	46.3227	198.991	1.48304e+06	2.20959e+06	2.28189e+07	9.19578e+06	3.87981e+06	4.66782e+06	2.19811e+06	2.24658e+06	4.5656e+06	1.22997e+06	132228	245053	125412	501680	0	135744	748122	196315	328053	343534	3.89651e+06	3.21339e+06	2.66727e+06
494	206.168	447.151	978465	463971	1.40572e+06	177308	322562	487022	1.06306e+06	428894	417450	623336	40384.3	0	65530.7	0	300335	0	101244	225095	0	35116.1	319161	417384	430500
495	197.813	551.213	2.7798e+06	643991	4.48242e+06	675768	1.39738e+06	2.9827e+06	3.36759e+06	1.58982e+06	486810	3.50285e+06	791391	703003	570057	261331	6.83521e+06	684482	3.45185e+06	2.07292e+06	1.36081e+06	722221	1.7567e+06	798934	1.16296e+06
496	181.486	523.218	269875	91238.1	154388	0	0	69022.7	0	59395.3	209123	0	3.79743e+06	4.64275e+06	2.4003e+06	3.35697e+06	6.6909e+06	4.85953e+06	2.50789e+06	3.4139e+06	6.88774e+06	1.9883e+06	2.55717e+06	2.31233e+06	2.22653e+06
497	217.236	271.097	1.26585e+07	6.16987e+06	1.51747e+07	5.43015e+06	8.52499e+06	1.09907e+07	1.07324e+07	7.76621e+06	5.39159e+06	4.90782e+06	669785	900818	153851	397903	808005	608936	79890.3	287191	216623	620585	5.00779e+06	4.99737e+06	5.10843e+06
498	196.186	361.091	2.90728e+07	3.30569e+06	2.6413e+07	1.58264e+07	7.75067e+06	1.78015e+07	1.58234e+07	1.89509e+07	2.18709e+07	1.84111e+07	567356	1.2836e+06	124529	1.06536e+06	1.40333e+06	967315	225138	2.56257e+06	274688	398987	1.30693e+07	1.08056e+07	1.11305e+07
499	80.4653	449.108	1.04454e+06	2.76487e+06	1.20184e+06	1.46279e+06	1.36703e+06	2.41702e+06	1.85358e+06	1.98896e+06	3.06231e+06	1.48096e+06	0	0	0	59702.6	0	155374	0	0	0	505321	1.19975e+06	740376	841267
500	184.268	282.075	67985.5	0	0	171888	159057	5.4723e+06	95849.7	83451	108718	217137	429559	70612.2	167778	693510	1.48994e+06	5.69534e+06	1.49541e+06	228934	1.65093e+07	3.56604e+06	2.10721e+06	1.85061e+06	1.97074e+06
501	147.169	241.107	402592	1.11817e+06	1.70412e+06	1.2795e+06	800893	717169	1.33718e+06	751642	1.21859e+06	127205	8.57565e+06	6.04229e+06	5.91294e+06	7.81451e+06	1.2215e+07	1.12685e+07	6.71026e+06	8.2691e+06	8.95491e+06	7.63384e+06	3.65666e+06	4.04074e+06	3.72433e+06
502	219.853	393.194	359074	717052	505341	2.10887e+06	404553	136119	866542	226484	508609	188592	66396.5	246123	84440.6	236243	31080.3	0	0	0	48574.9	136236	241602	256540	309160
503	260.061	471.223	0	0	121684	0	0	0	0	0	0	0	770157	1.19887e+06	653346	966165	743127	693275	503111	1.07631e+06	1.24704e+06	218601	257948	240959	180325
504	261.412	304.13	1.35088e+06	0	207603	94732.2	839510	0	47413.1	52809.7	1.26851e+06	1.72513e+06	32909.9	1.00227e+06	0	0	0	1.14904e+06	29566.5	728323	72908.3	0	455876	455161	332634
505	25.397	329.142	0	0	0	0	0	0	0	0	0	0	1.13723e+06	5.77901e+06	3.79868e+07	3.46927e+07	6.65764e+06	2.36176e+06	5.41379e+06	929254	6.52647e+06	2.1398e+07	1.00671e+06	1.38156e+06	1.28819e+06
506	223.688	247.118	80365.9	254814	1.22631e+06	3.38207e+06	388213	1.59444e+06	401199	253691	349369	162415	2.43122e+07	3.77789e+07	2.13073e+07	1.09979e+07	1.87055e+07	2.53251e+07	1.44327e+07	3.11415e+07	5.00192e+07	1.65428e+07	1.08134e+07	1.09406e+07	1.11627e+07
507	192.273	521.129	5.42481e+06	2.1439e+06	3.38957e+07	1.08343e+06	7.22145e+06	6.77523e+06	3.25632e+06	1.52363e+07	1.38557e+06	1.14988e+07	0	0	0	0	0	0	0	0	0	0	5.54012e+06	5.38843e+06	5.89604e+06
508	103.145	533.165	5.07113e+06	2.07769e+06	3.25736e+06	463528	734962	3.16559e+06	1.54438e+06	96144.9	134588	2.13331e+06	0	0	0	57767.4	49753.8	0	0	0	0	0	863418	842611	541664
509	55.0795	167.001	1.10911e+08	1.78428e+07	1.96411e+07	6.85545e+06	1.40119e+07	4.90919e+06	3.17173e+07	1.58733e+06	1.59399e+07	2.92817e+06	3.4405e+06	5.71807e+06	5.01904e+06	6.74358e+06	1.44909e+06	672815	4.96761e+06	2.42589e+06	2.57212e+06	1.69315e+06	1.60104e+07	1.31856e+07	1.81942e+07
510	208.84	537.182	439813	1.03521e+06	467844	260021	546249	324806	901475	355798	0	0	1.69172e+07	2.32904e+06	9.18708e+06	8.72862e+06	2.48975e+07	8.03e+06	1.74708e+07	1.44716e+07	2.80182e+06	1.80105e+06	4.27604e+06	770217	3.79486e+06
511	53.3539	740.522	909125	4.93247e+06	578471	1.71343e+06	2.62809e+06	1.26159e+06	7.2408e+06	4.89473e+06	2.19435e+06	1.53818e+06	1.17339e+06	1.02719e+06	1.0026e+06	0	0	854484	858921	1.82029e+06	1.08019e+06	152604	2.7004e+06	2.45444e+06	2.39025e+06
512	50.6522	377.2	1.88558e+06	1.38862e+07	2.35681e+06	6.56562e+06	2.60494e+06	1.57563e+07	5.82279e+06	2.06961e+07	227180	474037	414176	1.87862e+06	2.54324e+06	1.16602e+06	90806.9	0	0	103350	2.25153e+06	1.17265e+06	3.89342e+06	2.75545e+06	4.43454e+06
513	53.2934	485.349	1.69286e+06	531451	0	283049	0	2.00793e+06	0	0	275770	0	1.30037e+07	1.2369e+07	1.23858e+07	1.09462e+07	7.04443e+06	1.17263e+07	8.32224e+06	1.52667e+07	2.08691e+07	9.32064e+06	4.39372e+06	5.15116e+06	4.23479e+06
514	265	519.171	416415	404303	2.86559e+06	204633	685290	1.24823e+06	1.19323e+06	532540	376872	1.78628e+06	0	0	0	0	0	54862.2	21335.1	65682.8	0	0	522066	457827	568925
515	212.13	525.162	5.87759e+06	3.22801e+06	1.57502e+07	2.33454e+06	1.04244e+07	8.94866e+06	1.85546e+07	8.09015e+06	7.93555e+06	2.18898e+07	528451	1.17634e+06	550257	1.39614e+06	1.0264e+06	695564	670318	447430	965666	1.35042e+06	7.39823e+06	4.49615e+06	3.77413e+06
516	30.9381	333.246	1.98802e+07	2.31116e+07	3.12018e+07	2.6983e+07	1.29563e+07	1.84016e+07	5.43153e+06	1.95567e+07	3.27541e+07	3.76233e+06	0	197985	317306	0	138524	0	0	307464	139000	0	1.16224e+07	1.13603e+07	1.16666e+07
517	249.699	265.119	5.22479e+06	0	629873	1.8922e+06	7.18724e+06	0	5.62702e+06	0	4.77213e+06	9.51671e+06	0	4.65466e+06	0	0	0	9.83587e+06	195873	3.52346e+06	814891	0	6.48516e+06	6.04888e+06	4.40106e+06
518	184.66	327.181	498416	1.71345e+06	737519	617466	1.13086e+06	938146	1.11406e+06	963004	1.09286e+06	1.13647e+06	2.11787e+06	1.55154e+06	2.40093e+06	1.92266e+06	2.04848e+06	1.74189e+06	1.68261e+06	1.83886e+06	1.71685e+06	1.55552e+06	1.44615e+06	1.65382e+06	1.60894e+06
519	253.311	613.178	1.08168e+06	217563	7.67069e+06	336969	0	1.29185e+06	1.03807e+06	1.35071e+06	0	1.16785e+06	0	0	0	147175	121007	0	0	0	0	0	873820	1.30648e+06	1.57803e+06
520	74.6185	185.117	813958	1.95969e+06	1.34522e+06	3.85291e+06	2.53869e+06	1.77647e+06	1.19964e+06	4.70426e+06	2.16158e+06	2.38551e+06	1.70408e+07	2.86756e+07	1.82864e+07	3.11006e+07	1.76176e+07	2.49101e+07	1.10189e+07	1.98409e+07	3.21367e+07	1.85119e+07	8.65691e+06	2.10596e+06	1.10274e+07
521	153.302	479.085	2.29974e+06	1.15997e+07	1.78034e+07	662129	820044	2.19776e+06	1.40405e+06	8.3684e+06	5.15277e+06	439389	0	0	0	0	0	0	0	0	0	0	3.53874e+06	3.00693e+06	2.82697e+06
522	222.428	331.119	1.67596e+06	177982	1.42502e+06	286191	385000	973209	614607	760042	375107	459687	42469.4	93405.3	0	0	58764.8	0	0	70316.3	0	51052.3	359789	561659	498364
523	79.3327	467.155	664582	2.18054e+06	819106	1.42983e+06	1.50769e+06	1.00898e+06	2.99924e+06	88700.7	2.50349e+06	3.3851e+06	0	0	62053	125573	0	74280.1	217990	0	0	202385	425073	441271	612070
524	80.8426	339.181	547937	1.72755e+06	1.46273e+06	1.06086e+06	898114	1.29545e+06	1.72812e+06	1.55289e+06	859471	1.47227e+06	1.89044e+07	1.63881e+07	1.56183e+07	7.01754e+07	4.87508e+07	1.04181e+07	1.68569e+07	1.6016e+07	1.23389e+07	6.29898e+06	4.6589e+06	5.34218e+06	4.68727e+06
525	194.537	255.087	1.81403e+06	614256	1.6102e+06	314179	1.31824e+06	1.29079e+06	380422	523003	2.02084e+06	456743	2.48969e+06	2.28734e+06	1.05303e+06	1.65093e+06	1.98278e+06	3.0873e+06	842273	1.83576e+06	1.87776e+06	1.54834e+06	1.42004e+06	1.17978e+06	696647
526	71.511	357.191	0	0	0	0	0	130322	0	0	0	0	3.97e+06	2.6141e+06	2.27684e+06	1.72392e+06	3.49858e+06	2.78538e+06	2.2233e+06	2.87653e+06	4.42525e+06	1.86896e+06	724538	1.01113e+06	1.01005e+06
527	201.789	563.155	983107	378327	1.40222e+06	540353	878197	1.04894e+06	972193	1.14231e+06	564814	911305	0	0	0	0	345381	0	0	0	0	0	541662	523647	455211
528	204.414	497.166	2.18341e+06	1.88583e+06	3.03403e+06	587436	1.80295e+06	1.65877e+06	2.69968e+06	1.63807e+06	672102	944273	0	0	0	0	0	0	0	0	0	0	411474	467441	323255
529	219.434	421.114	501944	509390	121444	239812	225442	253686	252715	69773.3	155908	31366	1.78264e+06	347720	923530	4.26648e+06	4.42045e+06	1.2485e+06	3.99298e+06	349301	1.90156e+06	406640	1.24817e+06	1.27828e+06	1.26984e+06
530	209.293	361.113	5.21812e+06	262063	1.34259e+06	599014	821878	2.51658e+06	1.93169e+06	444903	1.73875e+06	0	356845	79245	234673	337921	181987	537500	546831	335188	67317.3	0	597019	456722	477205
531	76.4627	255.196	4.29528e+07	9.13702e+07	3.4949e+07	3.42171e+07	1.65322e+07	2.83325e+07	4.25481e+07	3.35432e+07	1.89631e+07	1.9356e+07	1.12281e+07	1.57501e+07	1.37659e+07	2.26363e+07	1.50854e+07	1.68286e+07	1.20293e+07	1.09683e+07	1.66432e+07	1.25353e+07	1.94516e+07	2.1593e+07	3.0876e+07
532	64.1793	275.023	7.77609e+06	2.93197e+06	1.35473e+07	2.92501e+06	3.70035e+06	1.87864e+06	0	2.17533e+06	1.12208e+07	5.30401e+06	0	0	0	0	0	0	0	0	0	0	3.93577e+06	4.5047e+06	3.92417e+06
533	191.557	487.144	0	0	0	0	0	131331	0	0	0	0	287052	938710	391042	412873	2.31443e+06	955232	0	0	464896	482509	300555	265998	328821
534	230.618	438.299	2.58414e+06	1.18104e+06	2.98278e+06	501835	3.85232e+06	2.25725e+06	8.32851e+06	4.3821e+06	1.53301e+07	2.644e+07	1.3027e+06	1.96564e+07	2.11305e+06	799508	574024	6.59136e+06	2.09152e+06	3.47178e+06	1.60484e+06	940195	1.03457e+07	1.11171e+07	1.05846e+07
535	202.44	337.092	1.95262e+06	2.52373e+06	8.07449e+06	5.67149e+06	4.27734e+06	2.07955e+06	3.47942e+06	2.19439e+06	2.73634e+06	1.72598e+06	611186	291119	240322	459538	1.32211e+06	434981	618871	691183	303086	119510	1.89706e+06	1.71762e+06	1.76008e+06
536	70.8106	323.153	5.21379e+06	5.11842e+06	2.39653e+06	2.90838e+06	6.21032e+06	1.10802e+07	3.65045e+06	1.94505e+07	311113	97704.5	5.52194e+06	7.60739e+06	5.76929e+06	8.07945e+06	6.93912e+06	6.43826e+06	6.05481e+06	6.84214e+06	1.08172e+07	6.36564e+06	4.60065e+06	1.34543e+06	3.78804e+06
537	163.876	403.125	1.44263e+06	1.12397e+07	1.31109e+07	8.20205e+06	6.973e+06	1.10485e+07	1.01797e+07	8.59587e+06	1.73347e+07	9.80376e+06	0	0	0	0	0	0	0	0	0	0	5.20335e+06	5.13135e+06	4.59533e+06
538	145.869	491.212	0	0	0	0	0	0	0	0	0	0	1.21871e+06	0	187480	3.47904e+06	1.40666e+06	0	768341	0	337629	122275	824862	538023	812618
539	321.953	601.324	0	0	0	76023.6	0	0	70506	0	446371	0	1.49664e+07	1.88725e+07	8.12487e+06	6.84934e+06	4.90983e+06	3.00233e+07	5.75124e+06	2.03882e+07	1.72989e+07	3.03129e+06	5.89608e+06	7.56525e+06	4.83737e+06
540	191.442	331.08	1.58708e+06	1.01837e+06	2.17575e+06	1.73329e+07	2.28174e+06	2.91993e+06	6.52816e+06	907496	2.32057e+06	3.55824e+06	214974	361235	156813	281747	385225	415520	180502	4.5935e+06	146532	202950	2.98636e+06	2.24216e+06	2.75813e+06
541	102.292	523.111	475429	3.32801e+06	1.79521e+06	405906	505312	528771	684652	1.7649e+06	3.45425e+06	710030	54951.5	0	58229.9	109243	0	0	221403	0	0	249053	506472	478142	508536
542	75.1777	429.233	1.17181e+06	3.01471e+06	1.30054e+06	1.72532e+06	2.39974e+06	3.78246e+06	1.8595e+06	5.47821e+06	2.2636e+06	1.34931e+06	3.0572e+06	2.02954e+06	3.1529e+06	2.38956e+06	960339	5.8168e+06	2.02628e+06	3.3687e+06	3.3485e+06	1.4191e+06	1.1063e+06	1.38927e+06	1.60754e+06
543	345.548	264.087	571930	238369	275850	49644.4	765213	155094	202615	129422	105560	314563	0	95124.8	0	0	0	0	0	124093	69907.5	0	148695	190927	199443
544	245.137	343.103	4.15624e+06	9.63541e+06	5.27539e+06	1.6864e+07	5.79865e+06	3.83588e+06	1.53772e+07	834715	4.70352e+06	2.11583e+06	0	0	0	0	0	0	0	0	0	0	3.50017e+06	2.92149e+06	3.79348e+06
545	171.997	241.071	544636	5.4979e+06	5.61409e+06	3.15973e+06	3.73633e+06	6.33952e+06	1.95494e+06	3.24512e+06	2.74566e+06	1.70842e+06	4.17193e+06	4.28865e+06	1.77931e+06	2.34924e+06	4.57991e+06	3.14589e+06	2.5226e+06	3.9311e+06	4.945e+06	3.24416e+06	3.11249e+06	2.20465e+06	3.1257e+06
546	99.0127	371.207	0	0	0	0	0	0	0	0	0	0	9.51598e+06	7.04297e+06	5.60078e+06	1.75979e+06	1.10928e+07	1.09669e+07	9.64679e+06	1.50139e+07	8.48298e+06	6.30252e+06	2.76279e+06	3.52939e+06	2.56122e+06
547	212.202	241.086	3.24211e+06	2.01807e+06	5.45943e+06	1.6777e+06	3.34208e+06	2.8352e+06	4.81344e+06	1.13612e+06	1.13023e+06	1.91201e+06	2.26886e+06	2.29578e+06	1.68697e+06	2.66716e+06	2.52339e+06	2.1016e+06	1.37315e+06	2.42355e+06	2.4649e+06	1.24743e+06	1.50405e+06	1.53529e+06	1.57349e+06
548	225.292	540.367	235567	2.07967e+06	436283	406953	1.01585e+06	3.76442e+07	4.84542e+06	974652	3.51242e+06	2.83676e+06	264556	2.23074e+06	410763	82673.2	155039	1.47109e+06	486938	675917	512829	186042	4.28637e+06	4.47533e+06	3.66804e+06
549	125.749	519.186	6.61682e+06	1.25625e+07	3.89298e+06	1.25372e+07	7.76179e+06	1.06348e+07	9.8555e+06	8.21337e+06	6.52279e+06	2.96766e+06	0	1.48805e+06	0	3.26283e+06	644807	0	0	0	0	99280.5	5.09579e+06	4.73136e+06	4.79029e+06
550	267.053	524.299	1.52465e+06	2.57517e+06	94047.1	96216.1	970903	1.41545e+07	0	1.23473e+06	4.64662e+06	5.38207e+06	0	1.12906e+06	103443	0	0	262482	0	146238	0	0	2.297e+06	2.23884e+06	2.59859e+06
551	69.0779	243.087	3.84514e+07	1.07858e+07	1.76167e+07	1.45526e+07	1.40765e+07	1.68463e+07	1.53045e+07	1.55923e+07	9.38152e+06	2.1584e+07	9.59702e+06	1.17303e+07	1.66366e+07	1.43583e+07	1.72184e+07	1.102e+07	1.82849e+07	8.82011e+06	1.25979e+07	4.0661e+07	2.02639e+07	1.97541e+07	1.80714e+07
552	222.105	568.399	1.9042e+06	551819	78025.2	235125	128000	1.13754e+07	1.52273e+06	200017	0	355681	47812.4	0	0	0	46083.9	251714	48247.5	142473	0	0	693571	701460	663665
553	143.656	201.076	136258	0	0	0	0	0	0	0	0	0	3.05268e+07	1.96268e+07	9.35602e+06	1.65025e+07	2.07524e+07	3.09781e+07	6.90339e+06	1.85679e+07	1.37263e+07	8.18897e+06	6.4854e+06	7.75912e+06	4.16547e+06
554	183.354	148.027	3.19081e+06	2.441e+06	8.0775e+06	2.87479e+06	1.64797e+07	1.28282e+07	4.9463e+06	1.06343e+07	1.18583e+07	9.23581e+06	6.58582e+06	1.55109e+07	1.47221e+07	8.31473e+06	1.68159e+06	7.16591e+06	5.53452e+06	9.75958e+06	9.1281e+06	2.49058e+07	8.70819e+06	9.01261e+06	9.53577e+06
555	217.464	425.122	2.40236e+06	259955	1.84545e+06	462269	1.65044e+06	1.04031e+06	1.17123e+06	1.3948e+06	325567	6.07351e+06	0	0	0	0	0	0	0	0	0	0	1.48831e+06	1.29132e+06	1.47893e+06
556	296.613	507.151	275874	298506	566691	203575	728970	637930	739761	263941	74556.3	140381	0	0	0	0	0	0	0	0	0	0	233972	143974	254073
557	101.27	479.156	1.43933e+06	87161	311135	43410.4	156532	616501	171266	28541.4	44015.3	426513	1.1147e+06	1.03006e+06	1.30293e+06	1.7103e+06	2.47279e+06	1.20772e+06	2.98076e+06	1.40937e+06	1.42215e+06	517262	860735	662141	575077
558	74.4473	523.146	0	0	640001	0	724639	0	0	0	94111.4	1.50993e+06	1.1502e+06	359627	2.33766e+06	1.14863e+06	412507	806951	515317	688746	1.43762e+06	2.55834e+06	762901	937898	96945.2
559	208.126	267.087	8.03434e+06	685938	1.18654e+06	1.97445e+06	407379	1.0372e+06	978718	655808	161706	47222.5	159930	67906.1	97310.3	141756	215126	85005.4	695739	267536	127521	64834.9	834094	781341	943794
560	24.0528	287.023	4.71486e+06	3.49469e+06	2.39737e+06	771422	1.32571e+07	0	4.59742e+06	4.15938e+06	266153	2.80118e+06	444105	6.54764e+06	1.226e+06	4.07058e+06	732172	1.35384e+06	1.70408e+06	4.35555e+06	8.11494e+06	3.5703e+07	4.76172e+06	5.77212e+06	4.75882e+06
561	269.614	425.192	35538	0	494883	1.08084e+06	2.67648e+06	0	71840.2	216076	4.09398e+06	8.22175e+06	0	0	0	0	245791	1.31759e+06	0	427067	505368	0	687005	923058	1.01156e+06
562	172.473	121.049	7.45509e+06	7.01471e+06	9.68715e+06	3.89124e+06	6.62122e+06	1.22519e+08	6.36164e+06	1.40062e+08	5.37011e+06	1.9318e+07	1.5264e+06	3.47009e+06	2.38909e+06	3.39422e+06	2.70247e+06	1.52301e+07	2.67202e+06	3.02967e+06	3.17227e+06	3.55216e+06	2.11642e+07	2.09711e+07	2.28046e+07
563	149.369	330.046	0	188867	0	0	1.6115e+07	0	0	1.23758e+07	1.44147e+07	0	0	891601	0	0	0	2.1782e+07	1.24042e+06	2.05881e+06	3.20064e+06	263578	4.79678e+06	1.4437e+07	1.44701e+07
564	159.789	433.244	1.39943e+07	1.26636e+06	5.42516e+06	8.86169e+06	3.26021e+06	2.12486e+06	3.54482e+07	6.02509e+06	2.64462e+06	9.79089e+06	2.12149e+06	3.39536e+06	1.81824e+06	1.75075e+06	1.17376e+06	2.71668e+06	1.22495e+06	2.87512e+06	4.03314e+06	517544	602495	2.56627e+06	3.64166e+06
565	207.381	317.16	80497.7	29463.2	63189.9	0	210365	284982	0	0	67648	168154	6.13206e+06	5.52936e+06	6.8355e+06	4.97368e+06	6.414e+06	9.50171e+06	4.437e+06	7.35217e+06	1.18303e+07	2.60336e+06	3.6998e+06	3.37208e+06	3.14396e+06
566	74.9131	443.264	0	0	0	0	0	0	121593	0	0	0	1.14758e+06	1.30445e+06	1.19929e+06	2.12836e+06	1.67851e+06	1.3123e+06	1.6798e+06	1.30318e+06	2.1845e+06	1.35614e+06	774325	650825	96893.8
567	111.383	268.097	1.80459e+07	2.06108e+06	2.12397e+06	2.32055e+06	1.92468e+06	1.64459e+07	1.33905e+06	1.12131e+06	363140	314366	68636.1	0	0	0	0	0	0	0	66005.8	0	2.43736e+06	2.59769e+06	1.77856e+06
568	66.2499	113.06	4.88972e+06	0	0	0	0	2.19061e+08	1.18831e+06	0	0	491578	4.06931e+06	8.57086e+06	0	0	0	1.04707e+07	0	4.45771e+06	0	0	1.56014e+07	1.72779e+07	1.44587e+07
569	23.4927	403.216	8.24035e+06	5.19177e+06	1.6022e+07	2.24007e+06	507380	1.58422e+06	2.14511e+07	1.1832e+07	0	139336	139447	94731.9	39721.3	0	53353.5	56245.2	573035	476096	157128	0	3.86303e+06	4.74163e+06	4.25483e+06
570	67.2993	593.13	1.14843e+06	3.23073e+06	1.30096e+06	1.1754e+06	1.04008e+06	1.18133e+06	2.12733e+06	2.62339e+06	0	552700	0	0	0	0	53344.6	0	0	0	0	0	306062	278770	721952
571	154.435	721.235	2.21581e+06	0	2.61974e+06	0	0	698409	901014	1.42999e+06	748137	3.0217e+06	0	0	0	0	0	0	0	0	0	0	486139	263168	494626
572	94.8559	551.343	755598	519094	952800	1.34022e+06	507520	418210	3.58046e+06	1.83228e+06	445373	0	0	0	0	0	0	0	0	59631.7	87854.7	104682	494729	407562	523426
573	289.818	439.16	1.81124e+06	323471	2.63577e+06	477215	1.22334e+06	1.62104e+06	2.03458e+06	1.23334e+06	597810	1.18306e+06	0	37256.5	0	0	0	62540	0	0	79943.8	0	920756	785270	778968
574	201.94	205.035	6.53223e+06	3.36239e+07	3.92924e+07	6.01482e+06	5.58305e+07	1.26036e+07	2.11187e+07	2.26052e+07	1.61866e+07	6.10321e+06	184294	139094	0	94431.6	0	178479	0	0	0	0	1.82434e+07	1.78348e+07	3.61372e+06
575	280.012	493.155	780932	344845	2.55312e+06	1.82482e+06	390415	540976	1.04738e+06	218151	142441	844265	0	0	0	61377.5	37517.4	87339	0	0	0	29009.8	611657	602734	730548
576	98.7006	503.102	863884	1.63961e+06	0	1.50405e+06	208100	2.84296e+06	164308	1.82944e+06	1.26878e+06	115629	0	0	0	0	0	0	0	0	0	0	82749	245769	441427
577	67.1286	515.191	1.10027e+07	6.10341e+06	3.18644e+06	6.88519e+06	9.73359e+06	8.6317e+06	9.11408e+06	3.83709e+06	2.70593e+06	4.48948e+06	1.35195e+07	6.70604e+06	1.025e+07	2.46175e+07	1.78605e+07	1.43823e+07	2.46504e+07	9.85511e+06	1.15165e+07	1.00179e+07	1.19841e+07	1.17814e+07	1.20418e+07
578	23.0737	407.246	1.69225e+07	6.17122e+06	2.99731e+07	7.77489e+06	3.78735e+06	7.23949e+06	1.14818e+08	3.72413e+07	4.04487e+06	367465	269169	728984	841318	1.30681e+06	131277	70306.6	241863	96085.9	1.42872e+06	1.55444e+06	1.26178e+07	1.31214e+07	1.69103e+07
579	230.391	403.125	1.48618e+06	925499	1.55117e+06	3.12708e+06	4.06704e+06	1.24672e+06	2.73858e+06	1.49538e+06	2.00887e+06	1.68305e+06	38533.5	0	22542.2	378881	263627	352549	154770	69876.7	180867	208789	1.24051e+06	1.31435e+06	1.24413e+06
580	82.2681	257.077	1.2702e+07	658388	1.02802e+07	1.59857e+06	1.64458e+07	1.35014e+07	1.38659e+07	6.0814e+06	1.75523e+07	3.06039e+07	1.66558e+06	8.27102e+06	3.6889e+06	1.58372e+06	1.6345e+06	3.46249e+06	2.03073e+06	4.34623e+06	3.36217e+06	2.57459e+06	7.27798e+06	6.5093e+06	6.74512e+06
581	74.7808	545.333	0	0	0	0	0	0	0	0	0	0	3.72558e+06	2.1718e+06	2.46718e+06	4.33996e+06	3.04641e+06	3.21785e+06	3.08461e+06	2.56222e+06	3.3894e+06	2.34235e+06	1.2619e+06	1.35548e+06	911196
582	184.147	235.06	6.17727e+06	4.07181e+06	7.88039e+06	2.54789e+06	915368	9.99711e+06	1.25383e+06	4.31073e+06	3.23493e+06	2.94404e+06	486314	261608	382555	225927	146739	259135	282738	919994	0	37113.2	2.66983e+06	2.99355e+06	2.70904e+06
583	268.996	411.199	759234	159794	2.23367e+06	5.7462e+06	1.87089e+07	357431	3.59003e+06	2.00425e+06	1.90906e+07	3.21194e+07	56392.8	4.3298e+06	219038	0	47339.4	1.29812e+07	484193	4.78885e+06	3.29959e+06	0	8.09891e+06	7.89838e+06	7.27938e+06
584	351.788	429.139	232938	213709	431848	293427	468621	439051	721621	221959	171245	139988	0	0	0	0	0	0	0	0	0	0	252654	171483	162500
585	188.504	259.059	5.49689e+06	376641	4.51986e+06	1.43345e+07	1.04819e+07	786054	9.17862e+06	3.91707e+06	5.10145e+06	1.74293e+07	5.11351e+06	1.15104e+07	6.59634e+06	3.65101e+06	5.12806e+06	6.66206e+06	4.37344e+06	6.9602e+06	1.71099e+07	4.3502e+06	4.99321e+06	3.20956e+06	5.89456e+06
586	254.695	583.166	240985	690648	7.25235e+06	1.01522e+06	873657	2.54744e+06	982333	884913	0	0	0	0	0	0	30938.1	0	0	0	0	0	953161	917069	1.097e+06
587	124.201	339.072	56976.7	0	9.54775e+06	3.58838e+06	2.28021e+07	0	79472	4.29813e+06	1.45696e+07	1.36431e+06	912084	913368	58318.4	0	195902	5.39267e+06	787144	6.24422e+06	4.34614e+06	326238	6.3826e+06	6.32755e+06	7.44052e+06
588	182.282	585.327	0	0	39738.4	0	0	0	0	0	74230.9	82683.5	2.27585e+06	1.98846e+06	2.00589e+06	2.91588e+06	1.70382e+06	2.06998e+06	1.49691e+06	2.77537e+06	1.9305e+06	1.17179e+06	845442	714152	305975
589	189.577	535.183	1.25546e+06	1.93984e+06	828223	769531	2.92773e+06	1.59698e+06	1.93425e+06	732651	815934	360438	0	0	0	0	507953	0	44449.2	0	0	0	925415	804063	897076
590	198.891	264.124	3.43461e+07	0	0	0	1.73017e+06	0	75136.2	0	1.14463e+06	0	50555.1	388694	0	0	61052.9	175781	42799.4	391871	614381	131665	2.18265e+06	2.13119e+06	2.08737e+06
591	72.4968	455.227	0	0	305009	0	0	926979	0	354801	0	0	2.86139e+06	1.95904e+06	2.04996e+06	3.38602e+06	1.55249e+06	3.06891e+06	2.7146e+06	3.8033e+06	5.00649e+06	2.13573e+06	781451	1.55536e+06	958241
592	99.314	389.09	3.92631e+06	1.6917e+06	1.18584e+06	77643.4	3.75817e+06	1.99938e+06	0	870576	1.41142e+06	761489	61456.6	436110	92943.3	175640	0	0	48018.4	2.51386e+06	979547	126019	1.01967e+06	1.19651e+06	1.08588e+06
593	173.008	509.288	5.71723e+06	6.03039e+06	3.68765e+06	3.54366e+06	1.07605e+07	4.25596e+06	2.61618e+07	5.02127e+06	2.05166e+07	5.99529e+06	1.58695e+06	7.25762e+06	2.33031e+06	1.46785e+06	303936	2.45791e+06	2.7788e+06	3.9302e+06	2.34462e+06	853217	6.74048e+06	6.17222e+06	5.48056e+06
594	205.261	341.064	0	103276	55826.4	0	218699	273988	147718	189931	685543	64918.2	643011	702717	469163	0	609888	484633	497917	805488	2.36108e+06	427472	366980	399576	356776
595	187.857	233.045	5.93769e+06	4.54586e+06	3.0614e+06	1.85494e+06	815579	4.38691e+06	1.54772e+06	3.31918e+06	662963	1.44144e+06	177118	0	912736	1.14682e+06	1.53692e+06	0	1.17074e+06	269912	1.15693e+06	1.16343e+06	1.79424e+06	1.5787e+06	1.54611e+06
596	80.7926	477.14	1.04772e+07	2.05518e+06	8.92668e+06	1.64248e+06	2.88398e+06	6.21464e+06	4.60501e+06	2.02915e+06	1.49062e+06	9.07064e+06	0	0	0	0	0	0	0	0	0	0	2.32565e+06	2.01071e+06	1.66092e+06
597	132.015	327.144	204315	408528	1.2334e+06	489281	551656	2.62428e+06	770662	452709	1.3735e+06	6.18242e+06	1.24173e+07	1.51932e+07	6.24853e+06	1.54149e+07	2.99683e+07	4.38384e+07	8.46228e+06	1.05207e+07	2.87154e+07	2.63424e+07	6.5483e+06	7.71937e+06	7.26502e+06
598	222.199	463.145	1.38188e+06	2.23397e+06	2.2875e+06	5.78098e+06	4.43245e+06	2.53224e+06	5.92533e+06	1.10776e+06	1.61076e+06	2.08521e+06	0	0	0	33129.6	0	0	0	0	0	0	1.46479e+06	1.54661e+06	1.41426e+06
599	144.119	297.113	1.10604e+06	1.50711e+06	1.22772e+06	982998	535345	380895	1.70155e+06	145383	1.34865e+06	0	523376	0	0	84324.5	467221	766803	80273.6	169125	292432	327484	566002	507991	212099
600	188.975	315.085	1.52838e+06	458064	2.46535e+06	514107	791101	2.34782e+06	1.10477e+06	465318	2.28524e+06	3.65602e+06	1.43485e+06	0	4.89787e+06	2.20121e+06	1.20971e+07	717066	7.14744e+06	8.12027e+06	281903	275324	1.16596e+06	1.07179e+06	1.52036e+06
601	413.628	461.13	249411	0	271883	1.02002e+06	323410	305357	383228	0	143360	284202	0	0	0	0	0	0	0	0	0	0	197032	137446	114442
602	39.1499	271.097	1.10543e+07	7.16092e+06	7.98735e+06	2.0551e+07	9.7048e+06	1.00009e+07	1.27391e+07	3.84596e+06	5.11425e+06	4.36933e+06	1.15997e+07	7.50214e+06	1.05249e+07	1.5042e+07	9.33227e+06	1.36916e+07	3.01105e+07	8.08327e+06	1.14678e+07	9.13465e+06	1.05631e+07	1.17674e+07	1.07595e+07
603	94.9785	449.145	727575	4.04676e+06	1.16997e+06	4.6355e+06	1.38583e+06	2.86468e+06	1.0427e+06	2.92896e+06	2.20664e+06	2.33625e+06	0	0	0	0	0	0	0	0	0	0	998996	1.01461e+06	948384
604	193.288	315.145	1.90708e+06	302619	1.33965e+06	695660	928247	2.4854e+06	947231	634491	1.11616e+06	2.38468e+06	8.84217e+06	1.34626e+07	6.3738e+06	1.21596e+07	1.24711e+07	7.54114e+06	6.99504e+06	8.52437e+06	1.25699e+07	5.56111e+06	5.95148e+06	6.23381e+06	6.28214e+06
605	401.744	231.098	229776	46353	955112	752260	3.15739e+06	51068.8	751405	287224	517341	1.60937e+07	75964	3.11292e+06	38847.1	47756.5	58384.9	9.4499e+06	68953.8	928356	241717	21404.8	1.89043e+06	1.50949e+06	1.57784e+06
606	311.016	413.108	1.21393e+07	1.81654e+07	1.78733e+07	2.37735e+07	1.15318e+07	1.19243e+07	1.94258e+07	1.29376e+07	1.46835e+07	1.27403e+07	0	0	0	0	0	0	0	0	0	0	1.07277e+07	9.9455e+06	9.88651e+06
607	310.873	203.103	9.3128e+06	747621	1.82888e+07	2.04442e+07	6.82909e+07	3.00323e+06	2.63507e+07	1.75748e+07	1.43176e+08	2.17066e+08	1.69772e+06	8.33016e+07	2.51347e+06	0	0	1.10105e+08	7.79748e+06	3.91238e+07	1.85235e+07	1.63e+06	5.93457e+07	5.9285e+07	5.43194e+07
608	114.297	468.151	250638	37669.1	965698	256382	205283	681280	950726	276430	337976	852411	0	0	0	0	68191.9	0	130852	0	965058	0	0	95641.9	245266
609	33.0632	291.199	4.88856e+08	5.62106e+08	8.06589e+08	9.37999e+08	4.87897e+08	7.41214e+08	6.01146e+08	8.00013e+08	9.41467e+08	1.27001e+08	3.17908e+06	1.20995e+06	1.01349e+06	2.15086e+06	4.1809e+06	1.98249e+06	1.37153e+07	3.88996e+06	2.73534e+06	3.20465e+06	3.72236e+08	4.19472e+08	3.94506e+08
610	26.4905	209.084	1.06583e+07	4.66096e+07	2.63947e+07	2.75611e+07	2.15212e+07	1.85211e+07	7.04257e+06	1.68194e+07	6.33144e+07	1.19346e+07	352355	2.84708e+06	9.60544e+06	1.80791e+07	5.97039e+06	2.16151e+06	2.53822e+06	610242	8.36369e+06	1.83905e+06	1.3053e+07	1.64424e+07	1.92978e+07
611	18.6987	293.175	297974	1.13529e+06	2.56946e+06	1.06574e+06	596272	474738	3.59196e+07	2.40711e+06	779542	1.37407e+07	789298	971084	798302	3.81101e+06	611927	906889	873565	612614	859128	957351	2.75393e+06	565835	1.95342e+07
612	125.959	343.082	7.99431e+06	8.3148e+06	5.81902e+06	2.13165e+06	3.36139e+06	2.27535e+06	4.60674e+06	2.06031e+06	3.96902e+06	6.14558e+06	673617	1.17956e+06	569607	741278	2.01365e+06	1.51573e+06	868749	178435	1.0505e+06	980363	1.84611e+06	2.83342e+06	1.38943e+06
613	218.943	508.34	1.29533e+06	2.10526e+06	372548	230552	472492	5.20158e+06	369210	506865	1.18547e+06	427011	130582	801398	195289	90034.7	67572.5	402653	333886	298508	302879	0	789094	656704	774343
614	140.96	667.224	676979	3.64418e+06	901544	3.9013e+06	2.96425e+06	9.46766e+06	2.25412e+06	375095	3.15574e+06	4.511e+06	1.89905e+07	2.01703e+07	9.10408e+06	2.03576e+06	1.37636e+06	1.17566e+07	1.50928e+07	1.47834e+06	5.67076e+06	1.41652e+06	1.30339e+07	1.20515e+07	1.18068e+07
615	185.363	497.106	997538	93784.6	2.54157e+06	542132	500407	0	808709	584183	757186	602833	0	0	0	0	288503	0	0	0	324960	146133	356446	772052	579696
616	180.191	545.142	0	431561	451756	359013	719705	428713	571376	145027	380993	317394	190547	0	0	499991	95640.7	144042	88213.4	0	70415.6	185445	124691	431473	116384
617	32.1799	242.012	0	0	677027	378894	7.45867e+07	0	0	0	393538	5.00756e+06	0	0	0	249257	0	320872	0	1.16152e+06	1.37439e+06	1.23648e+06	2.76835e+06	3.67744e+06	3.88492e+06
618	96.5294	167.034	3.4546e+06	2.29001e+06	9.50273e+06	1.9662e+06	4.58446e+06	3.14081e+06	3.96966e+06	1.85365e+06	5.52028e+06	3.91741e+06	0	755216	539033	413824	2.26325e+06	233009	309206	0	0	1.72764e+06	3.81007e+06	2.94541e+06	4.34251e+06
619	185.241	197.022	5.33442e+06	6.85074e+06	9.61693e+06	7.21663e+06	6.31017e+06	3.5849e+06	4.73509e+06	1.19302e+07	8.17593e+06	1.46507e+07	4.67301e+06	4.20869e+06	5.07665e+06	7.60635e+06	7.56164e+06	5.01693e+06	2.73319e+06	4.92573e+06	9.07289e+06	4.7599e+06	4.25689e+06	6.47354e+06	9.93103e+06
620	224.946	717.24	1.22571e+06	1.2625e+06	1.91835e+06	157951	1.15591e+06	2.33127e+06	2.65575e+06	301447	187105	474711	100255	61849	23277.4	385602	238994	97183.3	0	0	28263.9	143961	565769	748824	827682
621	40.2754	379.139	3.94982e+06	858033	3.5293e+06	7.6843e+06	769541	0	3.49554e+06	0	2.02909e+06	1.70562e+06	1.32136e+06	1.02904e+06	1.88934e+06	1.29494e+06	1.82366e+06	2.03658e+06	2.51088e+06	1.23621e+06	1.95488e+06	3.3828e+06	1.99107e+06	1.26416e+06	841825
622	186.662	379.117	480700	0	0	136930	204213	100510	326911	114075	0	0	877012	2.32184e+06	88910.4	1.23454e+06	6.65119e+06	1.74581e+06	3.32265e+06	1.8009e+06	3.54364e+06	60537.8	1.2612e+06	1.1986e+06	1.26367e+06
623	167.793	844.606	2.36394e+06	5.94035e+06	7.13432e+06	1.16928e+07	1.28725e+07	2.58938e+06	1.3504e+06	7.62425e+06	2.19442e+07	1.26918e+07	5.29011e+06	1.31833e+07	1.1792e+07	4.33312e+06	5.3026e+06	1.22864e+07	1.6091e+07	1.34229e+07	9.41407e+06	5.64398e+06	1.0917e+07	8.64838e+06	9.79982e+06
624	183.614	183.006	2.69096e+06	5.89608e+06	5.0078e+06	7.93058e+06	4.12348e+06	7.96783e+06	5.70661e+06	1.11938e+07	1.01572e+07	1.07085e+07	2.4625e+06	715801	5.49143e+06	1.06701e+07	7.38861e+06	4.3954e+06	6.38673e+06	2.44683e+06	1.11854e+07	6.79246e+06	8.15275e+06	1.14919e+07	1.0995e+07
625	215.491	578.347	957285	9.11743e+06	2.64791e+06	929593	2.32605e+06	907943	6.57379e+06	1.13186e+07	4.20259e+06	1.58356e+06	142637	3.47649e+06	946965	1.84225e+06	386732	2.38785e+06	2.12367e+06	4.35558e+06	1.55523e+06	222077	2.81209e+06	2.7019e+06	2.88326e+06
626	350.395	373.113	567550	130364	734379	279565	466368	429931	451024	281879	181085	313081	0	0	10930	0	0	0	0	0	0	0	190569	187168	240886
627	343.425	230.012	452099	1.36517e+06	4.56027e+06	324088	1.22159e+06	2.95439e+06	667485	1.38234e+06	1.32771e+06	130129	0	0	0	0	0	0	0	0	0	0	844091	371215	823085
628	88.4524	475.254	0	71802.7	43441.2	1.79082e+06	380298	0	0	228997	84201	0	5.6086e+06	8.75691e+06	5.9139e+06	3.69066e+06	5.55151e+06	6.11155e+06	3.8989e+06	1.17604e+07	9.35114e+06	3.06194e+06	2.6497e+06	2.83327e+06	3.00856e+06
629	97.2362	391.233	0	380670	483307	877301	555784	528515	488574	595652	483682	92317.4	533681	3.18618e+06	621144	1.07566e+06	663867	96751.6	764395	387910	1.66919e+06	1.95545e+06	1.22359e+06	973854	1.02654e+06
630	127.616	659.198	915639	361378	1.21341e+06	282743	722126	840721	2.09338e+06	459864	783254	652348	577114	0	159080	328943	309008	0	128291	0	157353	58596.3	406846	527497	540775
631	91.2413	265.071	5.34172e+07	2.105e+07	5.78113e+07	2.82147e+07	1.13393e+07	1.30898e+07	3.61608e+07	2.62016e+07	1.76669e+07	5.26331e+07	2.29108e+06	2.64272e+06	960394	1.72979e+06	2.44832e+06	1.96622e+06	1.00103e+06	1.62375e+06	1.62935e+06	1.05934e+06	2.08831e+07	2.0831e+07	2.38535e+07
632	80.5665	193.071	0	1.78823e+06	0	1.97377e+06	1.18142e+06	1.18085e+06	306117	2.32614e+06	0	2.80316e+06	948910	6.89512e+06	6.05177e+06	3.97114e+06	3.42862e+06	1.39231e+06	3.66589e+06	2.92525e+06	5.27094e+06	6.12298e+06	1.65955e+06	2.66194e+06	1.41127e+06
633	68.2503	545.203	793337	164238	222660	830918	1.21883e+06	982304	0	598554	0	340130	2.67147e+06	1.58742e+06	3.22777e+06	5.0858e+06	3.7011e+06	2.59965e+06	5.65421e+06	1.52618e+06	2.49514e+06	3.76627e+06	1.96773e+06	2.17402e+06	1.66167e+06
634	235.011	373.113	3.50712e+06	5.06924e+06	3.75022e+06	9.95465e+06	5.612e+06	2.86254e+06	9.43962e+06	2.65428e+06	5.15171e+06	3.95977e+06	152736	154375	238201	676849	700891	337820	142876	143021	340417	1.9643e+06	3.22422e+06	2.82662e+06	3.18938e+06
635	149.774	325.093	7.21944e+06	2.84014e+06	8.73946e+06	4.09927e+06	4.76892e+06	2.30456e+06	1.82674e+06	4.3536e+06	4.47493e+06	2.59081e+06	0	110676	60307.7	0	158449	240982	0	69490.5	55151.4	46545.5	2.04905e+06	2.08371e+06	2.00657e+06
636	396.3	473.162	327333	0	401068	0	470042	11919.4	139465	57442.5	831007	2.96279e+06	0	62173	0	0	0	3.93012e+06	0	209706	157088	8255.24	929787	1.48105e+06	889944
637	83.1825	373.128	8.40084e+06	3.70583e+06	1.26106e+06	2.0347e+06	2.98365e+06	3.51879e+06	4.36183e+06	472297	2.74295e+06	2.26793e+06	0	0	0	0	0	175487	98579.6	0	0	0	1.6691e+06	1.94363e+06	1.36298e+06
638	100.269	355.248	2.92356e+06	1.83897e+06	1.14925e+06	2.05766e+06	172827	4.62419e+06	2.11715e+06	4.01307e+06	0	599005	1.58581e+06	3.06423e+06	765102	1.29133e+06	1.72769e+06	1.84115e+06	978835	2.22143e+06	1.80228e+06	1.52266e+06	1.24581e+06	483006	611873
639	264.181	218.066	136488	1.11565e+06	4.03602e+06	1.73992e+06	739371	429798	1.55115e+06	1.43734e+06	3.39996e+06	924304	0	0	0	0	0	0	0	0	0	0	821804	894010	584017
640	183.829	225.076	877242	5.27869e+06	1.28596e+06	6.02096e+06	2.18534e+06	1.43528e+06	3.52963e+06	353165	1.45546e+06	1.70322e+06	860327	1.50824e+06	1.07946e+06	2.61361e+06	2.6783e+06	2.18247e+06	1.78716e+06	2.39912e+06	2.58335e+06	901983	1.79678e+06	1.57427e+06	1.6078e+06
641	235.19	389.145	2.92205e+06	2.48196e+06	4.55969e+06	4.97993e+06	2.54853e+06	2.35077e+06	5.25792e+06	918970	2.97296e+06	2.87509e+06	0	0	0	23582	0	0	0	0	0	0	2.31396e+06	2.42544e+06	2.06176e+06
642	133.008	549.198	1.1564e+06	2.67573e+06	1.31067e+06	1.684e+06	625986	2.40528e+06	1.309e+06	2.11688e+06	1.19245e+06	1.92327e+06	735011	154365	67406.1	812701	166999	0	221058	0	364233	711602	975813	810367	853510
643	156.125	489.234	143925	0	764967	254805	368279	69040	2.43837e+06	352845	430675	0	2.04597e+06	3.06224e+06	1.34717e+06	859410	764374	1.19988e+06	1.24152e+06	2.23907e+06	1.50805e+06	303450	822283	496781	532860
644	172.567	792.576	0	5.87194e+06	2.41144e+06	1.14994e+07	7.63738e+06	7.92738e+06	4.01977e+06	118869	4.84217e+06	1.09108e+07	3.8673e+06	1.28809e+06	1.81294e+06	825652	5.56773e+06	1.04998e+07	3.43183e+06	8.98709e+06	5.60812e+06	3.18002e+06	4.87481e+06	4.36939e+06	3.99065e+06
645	259.42	517.192	0	0	28512.8	20009.9	0	27171.2	0	0	0	0	954188	716996	172255	736401	485911	1.58636e+06	308915	787363	315350	536039	157021	140883	82682
646	289.226	299.098	671784	657643	1.41182e+06	860727	3.96077e+06	960542	2.17004e+06	1.9319e+06	2.71705e+06	4.24288e+06	307343	115239	210477	414595	452787	212147	471067	212150	763691	1.112e+06	690293	578072	1.1485e+06
647	195.276	299.107	4.69953e+06	894318	1.47017e+06	1.99909e+06	313917	866067	1.44393e+06	233607	1.17635e+06	5.52401e+06	1.15352e+07	1.84834e+07	9.68849e+06	6.23131e+06	9.44981e+06	1.38205e+07	7.18866e+06	1.42658e+07	2.46079e+07	8.12766e+06	7.98004e+06	7.27896e+06	7.17081e+06
648	169.326	818.59	1.08317e+06	7.99228e+06	8.85289e+06	1.76224e+07	1.93789e+07	4.95614e+06	2.71122e+06	8.0943e+06	2.36056e+07	2.25434e+07	8.14566e+06	1.51212e+07	9.79332e+06	4.40864e+06	9.61027e+06	1.77191e+07	1.60693e+07	2.19711e+07	1.07893e+07	8.38843e+06	1.25595e+07	1.18794e+07	1.26458e+07
649	22.5993	436.282	2.66847e+06	1.10719e+07	7.3341e+06	1.71361e+06	1.42805e+06	3.61705e+06	1.80396e+06	2.3274e+06	1.75194e+07	940269	30099.2	130425	0	187579	27443.9	35242.4	62240.2	0	195721	0	3.41734e+06	2.78565e+06	3.40728e+06
650	200.919	393.119	1.11518e+07	3.30539e+06	7.34597e+06	2.72929e+06	4.95524e+06	5.13371e+06	4.81941e+06	2.82666e+06	4.73187e+06	3.98956e+06	2.28633e+06	1.71684e+06	1.43037e+06	2.53884e+06	1.86278e+06	1.48244e+06	2.1009e+06	1.60523e+06	1.54546e+06	1.07629e+06	3.75038e+06	3.54756e+06	3.19661e+06
651	54.1849	439.187	1.36008e+06	1.85452e+06	728243	2.91918e+06	1.80619e+06	2.14256e+06	2.33188e+06	4.59574e+06	3.36397e+06	2.8609e+07	117273	0	0	405040	139937	122786	84536.5	118312	209479	0	1.86554e+06	2.5602e+06	1.72426e+06
652	95.2711	329.16	453408	1.96447e+06	825202	2.90109e+06	256428	9.59242e+06	1.88211e+06	2.11344e+06	839183	409699	2.26303e+07	3.84603e+07	1.04091e+07	1.61736e+07	2.9128e+07	2.34496e+07	1.88165e+07	2.63558e+07	1.82791e+07	2.01723e+07	1.21608e+07	1.17335e+07	1.24714e+07
653	135.386	551.249	3.47429e+06	615243	1.021e+06	708185	638621	1.59348e+06	4.34385e+06	1.16193e+06	1.94683e+06	2.06997e+07	1.15292e+07	621023	260895	9.48229e+06	47362.7	2.6439e+06	201045	194948	696026	736914	1.78375e+06	2.24221e+06	2.69425e+06
654	181.986	519.147	2.46829e+06	7.47081e+06	3.27945e+06	7.96708e+06	2.81479e+06	3.46542e+06	4.36494e+06	2.50906e+06	4.12525e+06	2.095e+06	9.66203e+06	5.06781e+06	5.74875e+06	4.64612e+06	6.98033e+06	1.14107e+07	6.79939e+06	4.1344e+06	1.42319e+06	2.70653e+06	3.4089e+06	5.19183e+06	4.5745e+06
655	91.6569	459.076	75390.3	377081	785769	179210	1.03864e+06	6.79985e+06	247468	2.79545e+06	1.34644e+06	64429.7	0	0	0	0	0	76424.2	0	0	0	0	403733	472781	463009
656	230.623	375.07	203893	403165	577198	324778	342722	196087	41330.2	479463	767661	83981.9	23016.9	0	21546	0	0	0	14853.4	0	56286.8	407614	313268	276981	434912
657	122.05	190.035	531349	1.31006e+06	7.50579e+07	1.9062e+07	6.52794e+07	1.35854e+06	575161	3.54516e+07	5.18366e+07	4.02661e+06	3.55611e+06	6.13469e+06	5.15041e+06	1.20811e+07	2.60032e+06	1.85101e+07	1.2073e+07	9.49344e+07	7.786e+07	3.37751e+07	2.96493e+07	2.97968e+07	1.61708e+07
658	251.445	457.244	112652	61194.9	279332	53422.6	0	279001	632206	0	0	320469	1.77028e+06	1.44135e+06	1.25642e+06	1.64737e+06	1.51411e+06	1.38964e+06	1.17118e+06	2.26784e+06	2.82463e+06	699058	1.44121e+06	1.25434e+06	1.03125e+06
659	159.423	423.187	6.23956e+06	7.68175e+06	1.25547e+07	7.54283e+06	5.4884e+06	8.84977e+06	8.06158e+06	3.59216e+06	5.82085e+06	6.27132e+06	566656	0	597727	1.18197e+06	1.80615e+06	863482	1.57319e+06	367858	2.52958e+06	934654	4.73488e+06	4.59507e+06	4.31979e+06
660	283.171	383.192	2.19881e+06	714050	469385	617115	0	834803	852902	1.47127e+06	0	0	1.02627e+06	2.76209e+06	946414	1.21014e+06	550394	0	994754	296677	2.36169e+06	1.13923e+06	417211	1.00372e+06	627003
661	135.835	389.217	0	0	68384.7	0	0	0	0	0	0	0	8.85587e+06	6.21956e+06	7.4245e+06	7.01201e+06	5.59859e+06	6.18092e+06	4.44159e+06	4.29682e+06	1.39161e+07	5.05965e+06	1.7646e+06	1.98945e+06	1.77711e+06
662	132.985	309.183	4.39003e+06	1.20244e+07	8.29071e+06	1.01341e+07	7.51174e+06	4.49542e+06	9.88504e+06	9.05329e+06	2.26202e+06	999831	826706	692478	2.68905e+06	360082	1.29691e+06	1.79169e+06	1.39806e+06	1.00727e+06	3.40902e+06	1.00276e+06	3.34383e+06	4.89073e+06	4.40524e+06
663	157.915	197.031	3.74334e+06	7.24056e+07	1.43905e+08	6.15792e+07	2.53826e+08	6.8589e+07	5.68142e+07	5.78821e+07	1.78639e+08	2.44173e+08	2.21374e+07	6.01243e+07	5.19834e+07	1.33579e+07	8.69085e+06	5.15277e+07	2.32309e+07	4.38073e+07	4.22123e+07	4.39865e+07	8.05268e+07	7.68544e+07	7.77109e+07
664	298.434	267.108	1.9139e+06	187031	932056	1.83249e+06	63967.1	402722	987835	0	0	1.23372e+06	0	0	0	0	19439.1	0	0	0	27917.3	0	353541	176251	266615
665	296.062	277.119	664108	0	192818	498787	2.27769e+06	52858.7	419093	0	1.99013e+06	9.17747e+06	129190	1.41828e+06	0	0	0	2.95904e+06	35130.1	1.25356e+06	40361.8	124444	1.54466e+06	1.18244e+06	1.17935e+06
666	156.125	451.255	0	358569	243773	0	346112	0	2.41859e+06	773253	0	0	6.78885e+06	1.80636e+07	1.41984e+07	1.76363e+07	7.41232e+06	3.56511e+06	1.24229e+07	4.56293e+06	1.70238e+07	1.205e+07	6.77259e+06	5.6247e+06	5.99179e+06
667	29.989	263.059	1.84675e+08	2.80668e+06	7.8647e+07	1.10063e+08	1.62033e+07	6.08928e+07	2.36247e+08	2.25976e+07	4.14531e+06	2.52845e+07	6.02598e+07	1.93121e+07	1.63896e+07	1.55715e+07	8.59288e+06	6.25669e+07	2.37064e+07	1.81001e+07	3.62879e+07	1.07827e+07	4.79462e+07	5.52218e+07	5.24414e+07
668	28.3969	277.075	9.86622e+07	3.37708e+07	1.95907e+07	5.00714e+07	2.20414e+07	4.30941e+06	5.7164e+07	1.44071e+07	8.49311e+06	2.49941e+07	5.00912e+07	4.85371e+07	3.86036e+07	4.49433e+07	3.53838e+07	4.207e+07	5.04382e+07	4.19644e+07	8.84657e+07	2.95683e+07	3.97372e+07	4.40564e+07	4.52937e+07
669	80.3161	353.16	0	327900	0	0	0	228355	229089	62105.2	0	66232	176499	107940	213204	0	0	129680	0	195907	173612	403360	301877	776278	832912
670	208.151	263.139	7.04896e+06	863602	9.06437e+06	7.93353e+06	5.1625e+07	1.76536e+06	9.63895e+06	5.53204e+06	6.08347e+07	7.6149e+07	946360	2.14569e+07	1.75552e+06	1.29317e+06	258969	4.10227e+07	5.24205e+06	2.42103e+07	6.89783e+06	1.46669e+06	1.84538e+07	1.71281e+07	1.76239e+07
671	175.417	359.097	2.57962e+07	2.98357e+07	3.09809e+07	2.46877e+07	4.59282e+07	4.58553e+07	4.37579e+07	1.54793e+07	1.03345e+07	9.53539e+06	9.61187e+06	2.16595e+06	5.21626e+06	4.26467e+06	1.09515e+07	2.85291e+06	2.72294e+06	2.07325e+06	2.32287e+06	1.08256e+07	1.48647e+07	1.61589e+07	1.58338e+07
672	2.64841	144.066	494726	589536	0	0	0	0	494054	413965	0	0	0	0	0	0	657578	512974	376047	0	0	0	0	274643	722414
673	3.35715	327.181	0	0	377694	0	746673	683453	571938	0	438841	0	0	0	0	0	0	0	0	0	0	0	492055	674171	0
674	3.43341	151.06	0	805076	1.99814e+07	0	0	0	0	0	0	4.234e+06	0	0	0	0	0	0	0	0	0	0	1.80546e+06	0	1.50962e+07
675	3.45851	196.993	0	0	855537	1.00428e+06	0	1.2828e+06	999872	541373	768894	963375	0	1.2139e+06	769160	1.06893e+06	610053	0	1.65881e+06	964626	1.26926e+06	0	794155	987136	1.29539e+06
676	3.4969	94.9794	1.33537e+07	1.49814e+07	1.26006e+07	1.68633e+07	1.61146e+07	1.69395e+07	1.47211e+07	1.51646e+07	1.84722e+07	1.57734e+07	1.48271e+07	1.95905e+07	1.90468e+07	1.64026e+07	1.80392e+07	1.85515e+07	1.9348e+07	1.45112e+07	1.69052e+07	1.82953e+07	1.47278e+07	1.74637e+07	1.47837e+07
677	3.4969	172.957	2.32461e+06	2.22059e+06	2.51099e+06	3.34968e+06	2.3988e+06	3.46598e+06	2.72012e+06	2.67198e+06	3.0845e+06	2.20265e+06	3.29714e+06	3.08188e+06	3.54554e+06	3.05796e+06	2.74154e+06	3.90355e+06	4.32182e+06	2.6056e+06	3.57867e+06	3.19187e+06	2.79883e+06	3.11688e+06	2.44062e+06
678	3.49867	101.023	1.67731e+07	2.17964e+07	1.53941e+07	0	2.4005e+07	4.84657e+06	0	0	0	1.85463e+07	1.06408e+07	8.42039e+06	0	0	1.81511e+07	0	0	1.36304e+07	0	1.02154e+07	1.55231e+07	0	2.21732e+07
679	3.50031	110.939	0	830877	0	2.16105e+06	2.11927e+06	1.81329e+06	1.77659e+06	0	1.54428e+06	0	2.08568e+06	2.21635e+06	0	1.87136e+06	1.59145e+06	0	0	0	0	1.89122e+06	1.86026e+06	1.98935e+06	0
680	3.50083	158.081	0	0	0	742892	837526	0	0	694507	0	0	782810	381156	0	0	440293	0	412801	711507	502275	0	355192	789741	1.3423e+06
681	3.51295	75.0075	835127	1.36551e+06	1.52734e+06	979028	0	636279	1.28396e+06	0	984834	0	1.00867e+06	0	0	927366	893584	1.17231e+06	0	0	733183	0	0	1.08132e+06	1.66878e+06
682	3.51295	155.001	2.31046e+07	1.89351e+07	1.98173e+07	0	2.392e+07	0	2.59547e+07	2.53732e+07	2.29426e+07	2.92428e+07	2.72223e+07	2.56299e+07	2.36201e+07	2.54564e+07	2.05176e+07	2.53562e+07	3.14453e+07	2.66031e+07	3.14176e+07	3.2167e+07	2.09999e+07	2.46132e+07	2.88097e+07
683	3.51347	206.154	0	0	223859	0	0	0	300049	0	0	0	0	0	324646	0	0	306659	327147	0	0	346950	263151	273175	365709
684	3.51399	125.023	0	0	0	419223	0	0	0	0	727789	0	0	0	0	0	0	0	0	0	0	0	834401	624595	1.65175e+06
685	3.51399	217.002	0	1.16627e+06	0	935426	2.00049e+06	1.07646e+06	0	1.69374e+06	1.69343e+06	0	607659	1.71953e+06	0	0	3.56374e+06	838075	0	0	1.36415e+06	0	1.02481e+06	1.06988e+06	1.14005e+06
686	3.51508	141.016	1.39259e+07	1.38428e+07	1.27955e+07	1.63731e+07	1.46644e+07	1.53552e+07	1.48025e+07	1.2967e+07	0	1.17876e+07	1.25044e+07	1.59081e+07	1.47487e+07	1.10386e+07	0	1.53085e+07	1.23839e+07	1.32709e+07	1.23777e+07	1.39021e+07	1.09761e+07	1.45865e+07	0
687	3.51721	142.05	702073	770850	679289	319929	668524	375228	544064	865414	525297	490295	547040	520789	372450	465994	941320	476293	133471	439598	298499	332624	246246	495491	878545
688	3.52866	136.942	1.81911e+06	0	2.43749e+06	2.63305e+06	0	2.54541e+06	0	1.8472e+06	2.44325e+06	0	0	2.16331e+06	0	0	2.27943e+06	0	2.20507e+06	3.50389e+06	2.50461e+06	0	2.44872e+06	0	2.2656e+06
689	3.52866	161.044	0	0	0	0	0	4.64434e+06	0	0	9.28974e+06	0	9.84642e+06	9.34897e+06	0	0	0	0	4.48899e+06	0	0	0	1.44597e+07	7.49653e+06	1.68694e+07
690	3.5539	232.924	997533	786237	0	1.45628e+06	1.12721e+06	1.57182e+06	1.22695e+06	700708	1.24779e+06	1.08751e+06	1.33755e+06	1.78263e+06	1.4271e+06	1.45775e+06	1.2533e+06	1.5962e+06	2.33635e+06	0	1.32214e+06	1.37247e+06	1.04075e+06	1.18706e+06	810131
691	3.55607	76.9688	784003	882686	598014	1.0003e+06	857445	1.03816e+06	839956	471391	953713	0	1.01764e+06	975742	1.10906e+06	1.02483e+06	756285	957290	837399	1.02881e+06	896898	0	979629	970487	822859
692	3.86129	191.055	519492	373589	0	0	0	0	194332	0	0	0	0	0	0	0	0	0	68258.8	0	0	0	0	287261	680271
693	3.88063	80.9156	0	472041	554000	459755	597877	408916	0	0	0	439338	451607	0	0	635068	430238	551988	0	0	427710	555669	511202	678705	255332
694	3.94584	213.014	0	658038	495589	244381	266432	347170	253366	0	0	0	285909	0	0	392866	976505	0	274139	0	0	260919	569118	346745	0
695	3.97594	119.034	0	0	6.68634e+06	0	0	0	0	0	0	0	1.0587e+07	1.10904e+07	0	0	0	0	0	0	0	0	6.79515e+06	0	1.28156e+07
696	3.97895	90.0265	0	3.40153e+06	2.39149e+06	2.25618e+06	0	984592	0	4.74099e+06	0	2.66596e+06	1.86367e+06	1.05631e+06	1.96801e+06	1.92424e+06	0	0	0	2.98188e+06	0	0	2.38256e+06	2.72382e+06	3.78157e+06
697	4.14288	134.046	472215	673830	922073	0	988860	0	0	535979	0	653591	673603	0	700317	0	0	0	0	0	0	0	631688	384904	575863
698	4.14288	208.013	549936	0	0	527434	936802	558830	466143	474220	0	568979	0	0	0	514783	335141	544584	655870	0	389746	0	0	396352	929786
699	4.23538	309.17	0	0	0	1.40366e+06	1.548e+06	1.37692e+06	0	0	0	1.373e+06	0	1.48765e+06	1.34633e+06	0	0	0	0	0	0	0	0	1.41908e+06	1.3481e+06
700	4.40506	162.048	0	0	610741	668335	1.0904e+06	196573	0	141983	560794	806368	737813	521080	819072	1.80267e+06	0	1.09078e+06	0	0	0	0	0	565836	1.22575e+06
701	4.87271	137.94	1.55719e+07	1.21764e+07	0	0	1.35563e+07	1.49643e+07	1.50567e+07	1.47373e+07	1.06261e+07	1.49697e+07	0	0	0	1.28296e+07	0	0	0	0	0	0	1.13832e+07	1.49009e+07	1.7195e+07
702	4.995	85.0031	2.53854e+06	1.60064e+06	2.90268e+06	2.78016e+06	2.65296e+06	2.60826e+06	2.24979e+06	2.57845e+06	2.83871e+06	1.62535e+06	3.54354e+06	0	3.36688e+06	0	0	2.24414e+06	3.62483e+06	0	0	2.90394e+06	1.59211e+06	1.85089e+06	0
703	5.04598	112.014	1.06677e+06	1.42716e+06	1.62976e+06	997680	0	823220	1.04941e+06	1.22801e+06	1.2647e+06	1.3411e+06	1.21466e+06	1.10243e+06	1.07165e+06	1.12119e+06	1.23981e+06	1.03658e+06	0	1.40427e+06	1.27019e+06	793503	0	1.33237e+06	1.56402e+06
704	5.17977	154.036	3.76437e+06	3.22441e+06	2.98154e+06	3.26814e+06	3.38453e+06	2.70452e+06	2.98493e+06	2.29879e+06	0	3.38369e+06	3.09568e+06	2.99094e+06	3.45593e+06	0	3.27248e+06	3.65897e+06	3.9337e+06	2.99288e+06	3.53416e+06	3.52309e+06	2.62451e+06	2.88069e+06	3.5941e+06
705	5.33356	85.9984	1.02753e+06	888668	1.09266e+06	0	0	913404	0	405574	0	0	1.02922e+06	1.07746e+06	1.25112e+06	0	0	1.01641e+06	1.26214e+06	0	987054	0	816903	0	622650
706	11.4045	210.149	298517	159805	281120	335517	373751	331347	298290	302659	434296	265868	399621	368339	271533	301622	258979	360364	354784	244972	319342	281543	294932	282461	319275
707	11.6646	135.509	90817.5	135886	93618.8	155264	119721	179267	148414	77704.5	164379	106246	155452	114535	74072.7	37260.6	69141.2	118255	133974	152118	167843	177559	163195	104522	163304
708	11.6942	388.253	333975	276269	543033	520374	360636	340320	350787	383412	241120	367343	365636	704144	345826	99320.1	335908	771625	389941	326803	407368	365285	338212	349010	365344
709	12.0127	194.917	368350	405300	365999	318725	110865	281523	363995	401912	314707	382853	584547	282636	200414	305536	256932	332189	303640	381508	350531	315982	349038	316826	369515
710	13.3353	241.899	317561	235373	244201	418032	318232	338824	303843	204172	261566	303476	337606	452466	393543	334590	289518	390414	400920	299460	361822	363356	175857	347340	166925
711	14.7251	89.2547	521942	389290	577993	299863	382385	328011	345438	615244	503897	534417	536034	214757	291855	304648	898902	381850	345301	558097	352671	459321	542051	616077	547434
712	15.1286	177.04	552778	448288	463408	256875	479320	177407	520132	333685	555546	425938	337397	239038	321422	527384	429894	408448	193207	379836	284070	292606	411539	199413	656987
713	15.8881	232.924	887077	802767	734699	1.10812e+06	669910	1.28764e+06	875386	462611	1.0819e+06	665735	1.3151e+06	1.15424e+06	1.16993e+06	1.05271e+06	495901	1.14312e+06	1.62744e+06	915950	1.0139e+06	207589	1.17137e+06	1.08258e+06	487991
714	15.8962	78.9177	454127	445501	391797	77576.4	394729	626625	791289	470964	514214	469281	456310	460132	555762	457185	479403	509662	578527	495435	413717	451619	461522	375218	463301
715	15.8962	208.013	409845	389610	427306	524989	405718	537316	459054	396952	447018	387745	470339	542710	473046	568545	97007.4	638654	513388	485358	358646	484924	448533	555053	330934
716	16.1398	196.993	468170	471988	538593	818856	448794	800052	633273	463328	414773	487048	777542	751851	592178	772890	662740	715481	889982	719730	801441	775430	673018	764553	503738
717	16.2993	134.046	740390	656942	517939	448442	1.1272e+06	550528	488873	905728	473419	720923	526238	495469	336261	411335	746296	506057	656843	439613	490459	480200	539628	572679	691320
718	16.5933	172.957	1.97116e+06	1.77937e+06	1.8034e+06	2.09984e+06	1.71075e+06	2.17965e+06	2.06169e+06	1.25451e+06	2.08913e+06	1.70722e+06	2.37788e+06	2.3864e+06	2.2358e+06	2.30436e+06	1.5064e+06	1.93812e+06	2.7994e+06	2.34759e+06	2.35503e+06	2.6458e+06	2.0964e+06	2.13273e+06	1.78411e+06
719	16.6163	109.941	938548	1.01675e+06	1.33635e+06	1.07039e+06	998653	1.31285e+06	884624	975302	946412	1.06655e+06	1.2369e+06	1.18258e+06	1.2598e+06	1.24833e+06	1.17937e+06	1.13484e+06	1.28308e+06	1.23146e+06	1.16059e+06	1.13302e+06	1.14045e+06	1.23642e+06	1.11186e+06
720	16.7023	122.024	1.33898e+06	1.00504e+06	1.21594e+06	1.07274e+06	1.0392e+06	866051	768273	1.43605e+06	797603	1.10278e+06	1.02265e+06	989520	1.05793e+06	827294	812222	977460	866881	1.00357e+06	856383	752490	785260	1.0392e+06	1.35408e+06
721	16.7023	136.942	2.86682e+06	2.27719e+06	3.12521e+06	3.29124e+06	2.66457e+06	3.52183e+06	1.93389e+06	437198	3.21262e+06	2.48818e+06	3.13585e+06	3.41727e+06	2.90909e+06	2.88587e+06	3.22001e+06	3.09478e+06	3.32047e+06	2.747e+06	3.47642e+06	2.59162e+06	3.5359e+06	2.6625e+06	2.43225e+06
722	16.7286	112.014	1.54743e+06	1.22983e+06	1.66139e+06	1.01698e+06	1.29968e+06	827157	1.28311e+06	1.54852e+06	1.15179e+06	1.30651e+06	1.27219e+06	686920	1.02607e+06	1.04603e+06	1.40008e+06	1.17651e+06	1.015e+06	1.22849e+06	1.1743e+06	1.01768e+06	1.2995e+06	1.16157e+06	1.56141e+06
723	16.8205	76.9688	653117	573936	529192	660604	582060	639366	586109	503205	509623	564792	602827	655897	636882	683917	609134	605081	814030	457103	713825	649570	660104	648177	539947
724	16.983	139.937	2.17619e+06	1.7873e+06	2.21098e+06	2.2848e+06	2.09894e+06	2.25102e+06	2.38696e+06	1.80206e+06	2.02032e+06	2.06391e+06	2.16301e+06	2.26158e+06	2.16162e+06	1.99985e+06	2.21682e+06	2.01596e+06	2.50631e+06	2.07244e+06	2.48869e+06	2.10301e+06	2.3076e+06	2.03566e+06	1.95302e+06
725	17.1431	101.023	1.57645e+07	2.41559e+07	1.36612e+07	7.05826e+06	2.06546e+07	4.28584e+06	1.36718e+07	2.08634e+07	7.37131e+06	1.72705e+07	8.95293e+06	7.45634e+06	1.1694e+07	2.27853e+07	2.41016e+07	9.54533e+06	3.64164e+06	1.13863e+07	6.80398e+06	7.94524e+06	1.2179e+07	6.3215e+06	2.13912e+07
726	17.1632	110.939	1.35419e+06	883410	1.0321e+06	1.74155e+06	1.53171e+06	2.16056e+06	2.09164e+06	644470	1.82681e+06	853008	2.19456e+06	1.91862e+06	1.97289e+06	2.18964e+06	1.52834e+06	2.14512e+06	2.38177e+06	2.02264e+06	2.33625e+06	2.03927e+06	2.29206e+06	2.1138e+06	779565
727	17.324	154.036	2.17442e+06	3.0667e+06	3.2546e+06	3.40399e+06	2.70669e+06	3.18601e+06	2.96421e+06	2.87505e+06	2.37011e+06	2.38761e+06	3.43756e+06	3.18399e+06	3.09126e+06	2.74689e+06	2.62612e+06	2.73691e+06	3.46782e+06	2.83399e+06	3.09752e+06	3.18645e+06	2.90168e+06	2.87738e+06	2.48303e+06
728	17.3422	142.05	536063	720948	786476	546682	553723	485177	561496	775510	514844	568830	438187	448582	434848	369380	465656	383504	204939	233171	269224	372516	504036	321227	713073
729	17.3989	94.9794	1.28629e+07	1.07827e+07	1.13018e+07	1.29246e+07	1.02933e+07	1.23807e+07	1.15571e+07	9.26441e+06	1.04945e+07	1.02958e+07	1.32312e+07	1.25608e+07	1.25838e+07	1.31899e+07	1.05361e+07	1.21784e+07	1.36129e+07	1.09064e+07	1.16702e+07	1.23989e+07	1.36728e+07	1.29351e+07	9.86438e+06
730	17.4165	117.018	4.41596e+06	4.90689e+06	4.17176e+06	1.63499e+06	4.07758e+06	234310	2.78483e+06	6.45592e+06	3.23577e+06	3.42045e+06	1.20334e+06	1.59778e+06	2.70581e+06	2.84967e+06	6.90705e+06	730968	0	3.68308e+06	1.51207e+06	2.45694e+06	1.47502e+06	4.24877e+06	8.85196e+06
731	17.452	75.0075	1.3358e+06	1.24567e+06	1.09019e+06	982957	1.01186e+06	841719	1.05953e+06	1.05129e+06	744768	1.22977e+06	1.13133e+06	782489	1.02826e+06	872125	1.28586e+06	950998	831526	921262	1.08942e+06	915220	890159	943477	1.26085e+06
732	17.4783	98.0235	1.10887e+06	2.2567e+06	1.84879e+06	1.21485e+06	2.98018e+06	1.34069e+06	1.33959e+06	2.78907e+06	2.0756e+06	1.42273e+06	1.75835e+06	1.18159e+06	1.26261e+06	1.40571e+06	2.56109e+06	1.21276e+06	1.0178e+06	1.99483e+06	1.16519e+06	1.31981e+06	1.80474e+06	2.20209e+06	1.66428e+06
733	17.4963	191.055	595321	516883	285942	169789	329589	174452	245678	329390	155213	365666	247246	262542	240531	352868	317819	233891	157283	259484	225391	252071	277589	187374	494261
734	17.4972	80.9156	395934	605632	528915	658978	571075	544927	417215	402308	417024	688597	633043	509855	538481	512865	488231	337788	492583	556974	89457.5	356205	426346	634351	376359
735	17.4972	351.22	230258	166890	389641	357053	214064	290114	725386	139880	938606	159343	374235	242602	160962	396558	216879	202178	245136	260189	392446	178088	168221	215118	356477
736	17.557	126.03	493656	802666	538037	556548	558718	525589	615632	671779	465883	545976	666246	814225	470448	521913	577314	532136	587937	552699	489805	640076	503919	632908	529420
737	17.6251	144.066	445238	587383	553656	323926	426297	221522	662186	290401	385275	444793	367646	301265	622302	412050	545216	313039	626066	289366	379765	344350	271086	309374	479665
738	17.6517	85.0031	3.07242e+06	3.07487e+06	2.96453e+06	3.35707e+06	3.40972e+06	2.61513e+06	3.29527e+06	2.42524e+06	3.96444e+06	1.74196e+06	2.69352e+06	2.99391e+06	3.31866e+06	3.40881e+06	3.10358e+06	3.47699e+06	2.99349e+06	3.62952e+06	3.36684e+06	3.49225e+06	3.16472e+06	3.07016e+06	2.65087e+06
739	17.6684	116.071	3.014e+06	3.8062e+06	3.65163e+06	1.87574e+06	3.04511e+06	1.45433e+06	2.6611e+06	4.70184e+06	2.21567e+06	3.13723e+06	2.14337e+06	1.53641e+06	1.63547e+06	1.75302e+06	3.49992e+06	1.39679e+06	1.41571e+06	1.94403e+06	1.37251e+06	1.56915e+06	1.52049e+06	1.70556e+06	3.49665e+06
740	17.6684	238.092	243755	353755	208130	76533.6	371709	99678.4	212443	294425	524228	252135	216193	158290	270315	473220	377423	179363	43952.9	220487	140252	209763	348339	75964.9	347363
741	17.7059	133.05	220972	281631	450205	255977	139159	201786	235060	242381	199247	462927	234182	277108	361220	638040	261544	192982	212085	264330	299336	308661	228930	254621	517706
742	17.7059	137.94	1.53511e+07	1.48079e+07	1.51517e+07	1.55684e+07	1.62949e+07	1.64483e+07	1.31969e+07	1.47293e+07	1.38546e+07	1.52215e+07	1.55933e+07	1.59465e+07	1.58534e+07	1.61428e+07	1.55836e+07	1.51693e+07	1.83691e+07	1.60338e+07	1.564e+07	1.61259e+07	1.63613e+07	1.51677e+07	1.49176e+07
743	17.7059	221.066	2.4697e+07	3.77574e+06	1.48531e+07	2.98775e+06	2.31983e+06	1.1385e+06	2.67224e+06	3.67412e+06	3.5796e+07	2.19454e+06	4.27511e+06	1.71719e+06	2.63386e+06	3.95052e+06	3.30342e+06	2.35063e+06	911059	2.08607e+06	1.1154e+06	2.12857e+06	6.47733e+06	1.8511e+06	3.5281e+06
744	17.7577	90.0265	2.42701e+06	3.63692e+06	2.61116e+06	2.12869e+06	4.41773e+06	1.45575e+06	2.45949e+06	3.89997e+06	2.19707e+06	3.5927e+06	2.07081e+06	1.46237e+06	1.41075e+06	1.83418e+06	4.50732e+06	1.54888e+06	1.11748e+06	2.42584e+06	1.64812e+06	1.87978e+06	1.73778e+06	1.95368e+06	2.70998e+06
745	17.9919	105.018	512267	446303	769824	307965	425423	264467	374797	543584	318697	427217	355174	324139	424341	505982	452549	326467	175159	361344	411807	291083	292177	260069	696858
746	18.0079	198.04	1.477e+06	1.65261e+06	3.79224e+06	776011	884530	610202	654279	1.81994e+06	595373	1.36138e+06	827100	672466	873436	1.00332e+06	843556	1.14701e+06	617051	927220	2.20967e+06	794874	2.02666e+06	561991	3.6308e+06
747	18.0303	85.9984	1.07321e+06	1.09986e+06	709996	845448	907366	1.22619e+06	705715	842985	773543	821763	938826	1.02871e+06	966530	921737	923258	496350	1.15505e+06	792975	897624	853038	1.03761e+06	956285	594405
748	18.0466	73.0283	1.40992e+06	1.69766e+06	1.5104e+06	1.48104e+06	1.87462e+06	1.69594e+06	1.81154e+06	1.58566e+06	1.69967e+06	1.40746e+06	1.61618e+06	1.78432e+06	1.74083e+06	1.85313e+06	1.85272e+06	1.13291e+06	1.7681e+06	1.67392e+06	1.64502e+06	1.62209e+06	1.14404e+06	1.48992e+06	1.35814e+06
749	18.0601	239.902	180257	189026	244777	49841.5	235858	373219	220369	140409	218326	245928	406312	802075	416142	325931	240269	282454	432451	251357	260567	243670	278660	253801	145742
750	18.1883	88.7926	333369	509627	395205	156991	678694	186810	224486	383583	277617	423380	333345	159070	285230	157476	490082	199759	216619	206022	185951	593802	237612	265546	299418
751	18.3154	84.0078	695911	990598	683958	850406	703429	785650	664468	816114	854674	754641	762377	861680	756445	806291	891468	727805	783545	700505	795151	849027	796379	772062	721875
752	18.3174	171.102	1.56283e+06	1.32121e+06	1.77673e+06	2.27347e+06	1.52119e+06	1.07713e+06	1.98067e+06	1.60613e+06	4.15995e+06	1.55702e+06	2.08028e+06	2.26665e+06	2.5448e+06	1.68462e+06	1.78029e+06	2.07283e+06	1.12329e+06	1.94567e+06	1.26253e+06	2.47388e+06	1.2869e+06	2.36385e+06	1.69241e+06
753	18.4123	162.048	785645	934325	841649	495898	1.0546e+06	222632	761389	618799	560392	1.26633e+06	725662	519358	474002	1.38846e+06	979421	665611	264444	696579	448057	632661	674910	545798	1.31196e+06
754	18.4154	109.051	7.06762e+06	5.13854e+06	5.98221e+06	5.27575e+06	4.89861e+06	6.38533e+06	6.22096e+06	4.7683e+06	5.7872e+06	4.78964e+06	6.33246e+06	5.77931e+06	6.58398e+06	5.79939e+06	5.55197e+06	6.45509e+06	6.81897e+06	5.14061e+06	5.77111e+06	6.46704e+06	5.55469e+06	6.12705e+06	6.12811e+06
755	18.4608	113.023	3.276e+06	4.74174e+06	3.09369e+06	2.12373e+06	4.55697e+06	1.78707e+06	2.99792e+06	2.92254e+06	2.21239e+06	4.26786e+06	2.89348e+06	2.6517e+06	3.67902e+06	4.97718e+06	4.2974e+06	2.99357e+06	1.48983e+06	3.336e+06	1.95763e+06	2.69423e+06	3.01796e+06	2.4249e+06	4.88257e+06
756	18.4837	93.0082	2.05118e+06	573071	1.21504e+06	776302	613712	1.06268e+06	3.12801e+06	576289	702147	994324	938727	608597	984902	851602	607947	1.18328e+06	956189	586561	1.12505e+06	759349	1.77262e+06	590445	2.52694e+06
757	18.4945	155.001	2.33369e+07	2.41958e+07	2.26525e+07	2.64218e+07	2.3211e+07	2.86273e+07	2.38053e+07	2.3125e+07	2.38224e+07	2.37117e+07	2.47448e+07	2.63475e+07	2.60339e+07	2.41547e+07	2.22681e+07	2.29029e+07	2.45756e+07	2.36001e+07	2.25073e+07	2.37897e+07	2.69451e+07	2.46388e+07	2.06973e+07
758	18.5272	206.154	310600	207094	495677	359047	336974	391336	292486	305872	337921	307924	335060	642426	401111	343765	280581	414514	422031	324738	345237	370466	165463	295010	254053
759	18.5915	151.06	790916	1.25699e+06	1.93996e+07	0	124034	0	0	1.75257e+06	54904.1	3.70046e+06	86122.5	0	0	0	0	0	411784	1.01094e+06	0	0	2.17764e+06	0	1.18171e+07
760	18.6625	161.044	1.23297e+07	1.73607e+07	1.20426e+07	8.88332e+06	1.69118e+07	4.65751e+06	1.33954e+07	1.66569e+07	7.77424e+06	1.67892e+07	1.08106e+07	1.13027e+07	1.37418e+07	2.25416e+07	1.81361e+07	1.24464e+07	4.67825e+06	1.28864e+07	7.91756e+06	1.07685e+07	1.36554e+07	7.16605e+06	2.14686e+07
761	18.6911	353.174	1.48016e+06	596065	812114	1.09456e+06	1.17867e+06	922223	2.7466e+06	535295	943673	1.04601e+06	796520	794676	642656	639871	686799	556734	863342	802522	659369	677143	1.42891e+06	778270	548280
762	18.7404	217.003	699129	881396	843330	665104	1.2891e+06	1.10037e+06	1.46575e+06	1.03882e+06	1.64699e+06	953955	697435	1.66444e+06	1.14636e+06	854045	2.52271e+06	799694	1.04849e+06	825281	749599	1.54943e+06	1.17441e+06	1.25977e+06	777112
763	19.3222	201.025	756978	1.25907e+06	657854	362302	1.08217e+07	1.49371e+06	1.98974e+06	2.36782e+06	2.82037e+06	703163	257591	1.57934e+06	671249	208930	2.28599e+06	1.87181e+07	1.52896e+06	270134	2.28686e+07	2.03561e+06	1.82236e+06	621266	2.88146e+06
764	19.4278	156	831020	6.59738e+06	894079	1.1137e+06	1.06598e+06	1.09508e+06	724024	735816	1.09082e+06	934418	1.10422e+06	1.10135e+06	1.0353e+06	1.13318e+06	978440	731254	1.06883e+06	1.21085e+06	901581	996288	908743	1.02229e+06	764602
765	20.5471	367.011	828962	1.22085e+06	761843	889305	354760	444583	1.12507e+06	577080	1.11721e+06	1.04858e+06	263910	3.16623e+06	3.25643e+06	62482.6	249221	153387	278401	375138	3.17458e+06	2.75898e+06	1.10669e+06	1.12271e+06	1.06073e+06
766	20.6751	125.023	697417	1.05528e+06	942820	501217	1.32489e+06	746078	566026	739838	546902	949806	711060	677210	787752	1.21292e+06	946566	711128	329314	2.16425e+06	2.59734e+06	869575	970340	733187	1.32695e+06
767	20.7355	366.013	1.04737e+06	1.11592e+06	1.0272e+06	1.09053e+06	604318	600942	1.44501e+06	608813	1.10273e+06	1.38068e+06	270279	3.96745e+06	3.93284e+06	126326	300084	222241	315489	363938	4.02161e+06	3.29508e+06	1.40895e+06	1.58608e+06	1.52261e+06
768	21.0174	365.015	454880	554582	493555	466000	320738	249216	767481	208132	412900	554643	132992	1.96034e+06	1.97518e+06	37820.5	117877	107247	189140	182752	1.84497e+06	1.46435e+06	642107	775848	719257
769	21.0618	368.01	213944	587084	340548	408012	235493	287369	151889	158193	326347	494924	66981.9	1.51303e+06	1.4785e+06	32180.2	103175	62939.5	90040.8	66069	1.41899e+06	1.19159e+06	593351	558014	457763
770	21.7564	527.346	1.5579e+06	986222	1.26922e+06	2.0266e+06	1.53703e+06	2.50505e+06	590700	3.76122e+06	202002	20030	27388.7	652043	508955	389160	0	0	25705.2	0	483535	485332	1.14207e+06	1.18013e+06	1.27632e+06
771	22.1237	666.06	1.17234e+06	1.13334e+06	4.31389e+06	1.73129e+06	3.02522e+06	3.76376e+06	1.13016e+07	1.99649e+06	6.89458e+06	2.13783e+06	8.79797e+06	2.84583e+06	2.11517e+06	1.90911e+06	2.87787e+06	7.47884e+06	3.09961e+06	3.28416e+08	9.98043e+06	4.01102e+06	1.38203e+07	1.44167e+07	1.49853e+07
772	22.1246	667.062	396228	572080	2.34894e+06	868122	1.23486e+06	1.82605e+06	5.01455e+06	971578	3.65029e+06	939885	3.96348e+06	1.35502e+06	1.04821e+06	867822	1.31628e+06	3.38619e+06	1.37779e+06	1.5581e+08	4.56668e+06	1.95112e+06	6.70862e+06	6.79443e+06	7.14611e+06
773	22.1256	236.104	2.05892e+06	3.07973e+06	3.8868e+06	1.38724e+06	845173	2.07678e+06	673946	2.48145e+06	1.17673e+07	481116	534947	492116	319142	337786	227218	371821	453005	345110	1.41686e+06	351187	1.98173e+06	2.6414e+06	1.94221e+06
774	22.1256	492.344	3.72308e+06	5.9745e+06	7.60604e+06	2.64752e+06	1.47872e+06	4.25763e+06	600284	3.51775e+06	1.83942e+07	643477	310466	394821	264063	440870	152812	85028.8	185067	0	859484	207424	3.36817e+06	3.28693e+06	4.10706e+06
775	22.137	491.341	1.33696e+07	2.06249e+07	2.71141e+07	8.8877e+06	5.80338e+06	1.4776e+07	5.30527e+06	1.42703e+07	6.70689e+07	2.84566e+06	1.41954e+06	1.74597e+06	878620	1.60648e+06	588719	539000	743364	441516	3.35601e+06	911481	1.26441e+07	1.34327e+07	1.28756e+07
776	22.1669	505.357	5.62734e+06	5.49943e+06	1.18539e+07	3.38341e+06	2.97482e+06	9.61876e+06	2.27117e+06	4.96927e+06	1.64188e+07	607122	1.33791e+06	5.70679e+06	2.78985e+06	5.76935e+06	560146	682862	675704	449267	1.01901e+07	2.44311e+06	5.9932e+06	6.22957e+06	6.99499e+06
777	22.1695	478.329	6.31485e+06	1.03498e+07	1.28686e+07	3.9764e+06	3.5485e+06	7.67289e+06	612255	5.51666e+06	1.21885e+07	513619	880982	2.25261e+06	993543	2.36537e+06	386861	322634	338890	127811	3.83685e+06	1.07612e+06	4.44514e+06	5.55737e+06	5.29757e+06
778	22.1695	526.343	5.97414e+06	4.00201e+06	4.81704e+06	8.05042e+06	7.29523e+06	9.81843e+06	2.1071e+06	1.59303e+07	215648	376497	127249	2.14643e+06	1.86663e+06	1.26435e+06	124983	149895	176126	104635	2.11346e+06	2.0609e+06	4.32134e+06	5.34848e+06	5.44558e+06
779	22.1695	540.358	1.99173e+06	1.22787e+06	1.45948e+06	2.35981e+06	2.27548e+06	3.19513e+06	1.25454e+06	4.64002e+06	36916.6	26590.4	19902.4	741225	490278	461647	28987.5	25072.2	66991.7	0	596439	621642	1.34084e+06	1.48133e+06	1.37288e+06
780	22.1809	449.293	3.3428e+06	8.64979e+06	8.63007e+06	2.74816e+06	2.1069e+06	4.2176e+06	1.23196e+06	3.81454e+06	2.98329e+07	1.34116e+06	1.03407e+06	3.94523e+06	1.9639e+06	4.52563e+06	456850	406813	765006	110249	5.6505e+06	1.57672e+06	5.54683e+06	5.15702e+06	5.6067e+06
781	22.1833	668.062	59094.2	67879.8	463130	165033	403979	459395	505243	101312	921129	279678	1.18982e+06	341808	271906	246510	314030	927162	372560	4.47416e+07	1.25283e+06	600964	1.82803e+06	2.10408e+06	1.83599e+06
782	22.2138	526.845	3.86872e+06	2.42392e+06	3.07867e+06	5.2792e+06	4.82681e+06	5.8378e+06	1.59341e+06	1.07403e+07	216989	70585.2	127186	1.29953e+06	1.00564e+06	843233	78381.5	58393.8	144229	0	1.35229e+06	1.54077e+06	2.85586e+06	2.9133e+06	2.69131e+06
783	22.2141	477.326	2.44761e+07	3.73385e+07	4.75136e+07	1.51282e+07	1.18005e+07	2.85354e+07	6.93065e+06	1.96228e+07	4.68965e+07	2.11529e+06	3.30308e+06	8.17742e+06	4.73159e+06	7.75809e+06	1.41104e+06	1.15318e+06	1.89759e+06	900261	1.45066e+07	3.85672e+06	1.88982e+07	1.96819e+07	2.00158e+07
784	22.2531	98.9478	7.34152e+06	6.97751e+06	2.96764e+06	2.85557e+06	1.02813e+07	7.74718e+06	4.27845e+06	7.73574e+06	1.88736e+07	1.7445e+07	3.31285e+07	6.04021e+06	8.32533e+06	8.64954e+06	2.09527e+07	1.16768e+07	2.08772e+07	1.34565e+07	8.37712e+06	5.25259e+06	1.03222e+07	9.6081e+06	1.07103e+07
785	22.3663	235.1	2.05177e+07	2.98717e+07	3.45508e+07	1.23551e+07	9.23734e+06	2.37192e+07	5.8902e+06	2.30964e+07	1.10956e+08	4.45782e+06	1.8177e+06	2.46879e+06	1.31353e+06	1.23508e+06	517319	1.06915e+06	1.06061e+06	130546	3.14318e+06	1.57818e+06	1.9198e+07	2.14369e+07	2.19223e+07
786	22.4404	435.278	1.17971e+07	4.51878e+07	2.99622e+07	7.65002e+06	5.79392e+06	1.28465e+07	1.05005e+07	1.15587e+07	7.60463e+07	4.45466e+06	511892	1.01153e+06	773987	1.00473e+06	272371	111539	440719	63813.4	1.69351e+06	436160	1.42278e+07	1.38981e+07	1.42794e+07
787	22.4928	179.037	1.88158e+07	6.58455e+07	4.46942e+07	1.4104e+07	1.17613e+07	2.5327e+07	1.71579e+07	2.18332e+07	1.26497e+08	9.24439e+06	2.01003e+06	2.93423e+06	1.5962e+06	2.80222e+06	712105	1.04693e+06	2.62703e+06	595005	3.64763e+06	1.57952e+06	2.51301e+07	2.80168e+07	2.49872e+07
788	22.5993	222.088	2.68195e+06	6.4939e+06	6.35901e+06	2.04793e+06	1.82924e+06	4.292e+06	425022	3.83506e+06	6.97238e+06	305102	944844	2.47692e+06	1.24373e+06	3.14732e+06	398743	346770	536782	27175.4	4.58522e+06	1.2257e+06	3.39014e+06	3.43015e+06	3.35326e+06
789	22.87	221.084	4.5247e+07	7.40294e+07	7.32176e+07	2.4299e+07	2.10669e+07	5.56648e+07	1.23843e+07	4.56653e+07	7.4535e+07	3.68234e+06	1.02266e+07	3.29903e+07	1.89195e+07	3.7591e+07	5.37708e+06	4.16542e+06	5.89695e+06	2.16565e+06	5.15018e+07	1.47827e+07	3.76084e+07	4.23131e+07	4.07858e+07
790	23.0442	309.047	1.08564e+06	1.2744e+07	2.47224e+06	1.78515e+06	5.51109e+06	377980	7.43587e+06	1.50404e+06	683906	1.22532e+06	0	127806	51026.4	0	0	0	108029	227724	122249	0	1.94585e+06	2.02391e+06	2.29428e+06
791	23.136	243.104	385484	0	653948	48908.4	0	187935	0	138422	0	0	3.0972e+07	1.64691e+07	1.10338e+07	7.80365e+06	3.37411e+06	7.64798e+06	6.99571e+06	3.71695e+07	1.87097e+07	2.10853e+06	3.87475e+06	5.07941e+06	4.121e+06
792	23.1789	248.953	1.31757e+07	8.02659e+07	3.56252e+06	2.71893e+06	2.2934e+06	1.66046e+07	2.66272e+06	6.20326e+06	1.34862e+06	876678	460345	408158	4.07866e+06	4.81592e+06	167193	819095	245078	89710.7	231652	121896	4.8443e+06	4.61826e+06	5.03637e+06
793	23.2217	168.995	684546	3.88879e+07	1.5655e+06	1.20444e+06	1.42368e+06	8.11213e+06	2.28418e+06	3.76473e+06	241806	283059	0	0	0	0	0	0	0	0	40880.2	0	2.55291e+06	2.73639e+06	2.39473e+06
794	23.3408	216.055	497629	4.5592e+06	1.77806e+07	951467	9.75278e+06	2.57276e+07	3.72213e+06	452767	4.12219e+06	3.38398e+07	5.21267e+06	3.84969e+07	4.93989e+06	157279	0	1.08629e+06	4.21399e+06	5.89913e+06	1.28925e+06	0	3.9776e+06	5.36712e+06	5.18517e+06
795	23.9668	376.968	2.26935e+06	1.11254e+07	585287	7.45486e+06	3.45495e+06	7.6988e+06	6.10336e+06	7.50273e+06	5.27402e+06	5.97225e+06	8.15895e+06	5.50468e+06	1.79558e+07	1.37506e+07	1.50267e+07	1.0789e+07	1.23997e+07	1.10412e+07	7.02464e+06	9.74809e+06	6.43249e+06	7.16131e+06	9.82586e+06
796	24.0933	204.98	1.1904e+06	4.80727e+06	8.38686e+06	3.68585e+06	1.40682e+07	1.69897e+07	668774	1.02878e+06	1.43298e+06	7.24701e+06	197839	1.04682e+07	879900	8.17818e+06	2.9121e+06	927085	3.31565e+06	6.53994e+07	6.94061e+07	1.33459e+07	8.1858e+06	1.07848e+07	1.06892e+07
797	24.0964	203.001	3.38056e+06	9.18048e+06	3.3417e+06	1.31574e+07	3.85438e+07	4.07393e+06	2.81016e+06	1.14957e+07	1.59178e+06	1.05529e+07	740946	436740	728090	8.11803e+06	706077	2.45343e+06	381934	1.22635e+07	2.96264e+07	1.82388e+07	8.33281e+06	8.74645e+06	9.20678e+06
798	24.1333	217.052	2.69057e+06	2.23496e+07	7.80431e+07	3.78499e+06	4.62611e+07	1.01283e+08	3.35844e+07	3.30388e+06	1.98713e+07	1.33468e+08	2.44812e+07	1.65434e+08	2.3276e+07	1.23058e+06	380656	6.33229e+06	1.87759e+07	2.74896e+07	5.92402e+06	0	2.37754e+07	2.64567e+07	2.81679e+07
799	24.14	250.975	3.50674e+06	1.2264e+08	3.86884e+06	7.41688e+06	6.90361e+06	1.09059e+07	9.07367e+06	1.17494e+07	4.56599e+06	8.66786e+06	1.15427e+07	7.67192e+06	2.21137e+07	1.85667e+07	1.95804e+07	1.3498e+07	1.41955e+07	1.26041e+07	9.15002e+06	1.30087e+07	7.78419e+06	1.06164e+07	9.21196e+06
800	24.2782	349.241	9.05641e+06	1.73264e+07	1.35206e+07	1.64811e+07	7.0382e+06	1.4089e+07	1.16324e+07	1.39929e+07	4.31932e+06	2.21136e+06	1.40212e+07	6.18128e+06	1.51045e+07	8.15068e+06	4.61348e+07	1.66648e+07	5.31201e+07	2.11804e+07	6.07679e+06	1.09842e+07	1.27188e+07	1.3502e+07	1.33035e+07
801	24.5341	253.071	0	0	0	0	0	0	0	0	0	0	2.93736e+06	3.37861e+06	2.60775e+06	3.48051e+06	3.33594e+06	4.0727e+06	1.68117e+06	3.35954e+06	3.34258e+06	1.61587e+06	751698	1.17591e+06	487251
802	24.8685	423.221	5.59738e+07	6.80859e+07	6.00397e+07	4.58717e+07	2.88211e+07	6.05756e+07	4.66654e+07	4.14015e+07	958214	1.62144e+06	610211	7.30255e+06	2.51161e+07	2.2652e+07	5.07116e+06	1.48002e+06	4.35238e+06	1.45082e+06	4.89775e+06	8.75604e+06	2.4112e+07	2.66589e+07	3.21661e+07
803	24.8735	174.986	2.48535e+06	0	4.09834e+06	9.16567e+06	1.82111e+06	3.39656e+07	1.5257e+06	284537	6.51655e+06	808202	0	1.16374e+06	626878	1.12987e+06	2.32275e+06	2.50619e+06	2.06888e+06	2.4893e+07	2.48925e+06	4.95718e+06	4.67988e+06	3.53787e+06	3.50791e+06
804	24.8868	293.179	9.09998e+07	7.9766e+07	6.34853e+07	5.90742e+07	3.4596e+07	6.98221e+07	6.59339e+07	5.22541e+07	3.19361e+07	4.40767e+07	2.93537e+07	4.71389e+07	5.18499e+07	1.35055e+08	1.10864e+08	4.15078e+07	7.8479e+07	4.72117e+07	8.73546e+07	4.35197e+07	5.93641e+07	5.79328e+07	6.17376e+07
805	24.8868	422.229	4.53991e+08	5.4919e+08	4.64396e+08	3.61237e+08	2.39238e+08	4.6261e+08	3.65557e+08	3.36837e+08	2.67828e+07	2.00349e+07	1.78338e+07	6.40265e+07	2.10777e+08	2.03626e+08	4.84247e+07	2.6176e+07	4.23056e+07	1.67201e+07	6.71746e+07	8.75233e+07	2.08657e+08	2.1603e+08	2.61911e+08
806	24.904	172.99	1.1334e+08	1.73028e+07	1.43189e+08	2.57679e+08	8.15202e+07	9.23891e+08	1.5708e+08	2.01016e+07	1.79256e+08	3.72146e+07	1.12125e+07	7.61195e+07	3.70239e+07	5.01566e+07	7.77019e+07	5.61047e+07	1.07902e+08	6.80076e+08	1.06423e+08	1.72283e+08	1.65062e+08	1.66432e+08	1.83643e+08
807	24.904	421.226	1.96119e+09	2.34448e+09	1.96914e+09	1.61815e+09	1.03066e+09	2.0346e+09	1.56393e+09	1.49633e+09	9.83477e+07	8.91709e+07	7.74136e+07	2.71164e+08	9.16248e+08	8.77895e+08	2.20186e+08	1.16487e+08	1.93551e+08	9.46362e+07	2.90923e+08	3.90137e+08	9.30557e+08	9.40707e+08	1.14012e+09
808	24.9228	173.994	3.77882e+06	0	9.09233e+06	1.4889e+07	4.15014e+06	5.9311e+07	2.04497e+06	349817	8.76655e+06	1.29228e+06	163331	2.43223e+06	928572	1.36015e+06	3.18399e+06	3.18869e+06	4.75824e+06	3.88538e+07	4.92642e+06	7.8729e+06	7.69956e+06	5.81329e+06	7.64472e+06
809	25.0922	107.049	7.78277e+06	0	423936	159476	2.18534e+07	2.19361e+06	0	6.0836e+06	751307	3.6388e+06	2.15331e+06	3.61323e+06	2.05934e+06	1.87516e+06	2.34377e+06	1.7131e+06	81001	2.55263e+06	1.25058e+07	678781	3.30074e+06	2.92836e+06	2.61693e+06
810	25.2682	367.231	6.43863e+06	4.96607e+06	5.90628e+06	6.92391e+06	1.12141e+06	3.89965e+06	1.67284e+07	3.31425e+06	1.45105e+06	1.85106e+06	2.08379e+06	97198.6	0	5.66275e+06	9.61408e+06	2.08693e+06	6.73767e+06	1.50391e+06	0	826328	5.28962e+06	4.7242e+06	7.51999e+06
811	25.3576	294.182	5.91523e+06	1.05799e+07	7.13327e+06	5.61586e+06	3.25293e+06	8.49471e+06	2.36948e+06	4.40477e+06	1.04855e+06	6.3685e+06	2.69285e+06	4.70417e+06	7.4995e+06	1.93229e+07	1.5002e+07	5.23569e+06	1.01622e+07	5.97457e+06	1.13022e+07	5.30724e+06	5.3985e+06	5.30075e+06	7.44169e+06
812	25.369	266.151	2.36926e+07	2.68461e+07	1.81078e+07	2.01649e+07	1.18095e+07	2.24146e+07	2.17226e+07	1.95459e+07	9.02043e+06	1.77884e+07	7.29221e+06	1.6072e+07	1.9277e+07	3.98956e+07	2.61768e+07	1.18904e+07	1.94746e+07	1.58695e+07	3.8568e+07	1.42982e+07	1.89688e+07	1.80876e+07	2.18684e+07
813	25.369	507.313	9.22125e+06	1.65994e+07	7.3494e+06	4.80311e+06	4.78271e+06	7.724e+07	4.06357e+06	344817	4.73698e+06	4.95363e+06	0	0	0	0	0	0	0	0	0	0	5.55259e+06	7.04673e+06	7.51204e+06
814	25.7974	115.02	2.42841e+06	700977	1.27917e+07	0	1.20421e+07	6.29705e+06	1.28948e+07	4.18886e+06	6.69998e+06	1.82435e+07	9.57684e+06	8.40081e+06	7.07791e+06	1.98303e+06	384844	6.39673e+06	4.11282e+06	1.53484e+07	2.96471e+06	0	4.25729e+06	4.20604e+06	4.74632e+06
815	25.8025	467.31	1.22176e+08	7.88801e+07	1.11241e+08	1.08804e+08	1.09893e+08	1.395e+08	7.76165e+07	1.71798e+08	2.49175e+08	1.53599e+08	2.79783e+06	2.29644e+08	1.12503e+08	6.41114e+07	6.27141e+07	1.83349e+08	1.1364e+08	1.33637e+08	1.78488e+08	1.76438e+08	1.58882e+08	1.47792e+08	1.86391e+08
816	25.8116	466.306	1.56251e+09	8.52768e+08	1.38355e+09	1.22842e+09	1.42603e+09	1.46867e+09	1.84323e+09	2.06341e+09	2.85985e+09	1.55414e+09	1.9557e+09	2.71127e+09	1.19508e+09	6.50313e+08	6.28383e+08	1.96117e+09	1.2656e+09	1.49008e+09	1.94759e+09	1.85466e+09	1.77869e+09	1.73303e+09	1.95645e+09
817	25.8116	468.301	5.73825e+07	2.64354e+07	4.90874e+07	3.86569e+07	4.57385e+07	5.42912e+07	6.02815e+07	6.88159e+07	9.07113e+07	5.55738e+07	6.97803e+07	9.72948e+07	4.5159e+07	2.60483e+07	1.98173e+07	6.90892e+07	4.43414e+07	4.6931e+07	6.95524e+07	7.16496e+07	6.05823e+07	6.38727e+07	6.68116e+07
818	25.8121	186.045	7.99464e+06	4.33436e+07	4.63822e+08	1.20479e+07	4.1663e+08	2.1722e+08	4.30768e+08	1.94497e+08	2.85935e+08	6.46988e+08	3.43255e+08	3.52391e+08	3.04371e+08	7.60939e+07	1.98883e+07	1.89339e+08	1.48174e+08	5.55743e+08	1.85339e+08	1.77814e+07	1.75311e+08	1.75965e+08	2.04935e+08
819	25.8127	187.041	2.19531e+08	1.97052e+08	1.94179e+09	4.45733e+07	1.59317e+09	8.6481e+08	1.79879e+09	7.44046e+08	1.16156e+09	2.64904e+09	1.41273e+09	1.45397e+09	1.2349e+09	3.03916e+08	8.56842e+07	7.62108e+08	5.96061e+08	2.31263e+09	6.74097e+08	7.24516e+07	6.99164e+08	7.25104e+08	7.93719e+08
820	25.8127	931.615	3.34294e+06	2.01965e+06	3.83452e+06	2.90603e+06	6.47795e+06	5.78343e+06	1.07371e+07	9.74758e+06	1.89109e+07	8.02057e+06	1.09356e+07	1.26954e+07	3.98163e+06	2.47838e+06	2.89625e+06	8.94315e+06	5.22014e+06	7.27919e+06	1.05644e+07	8.97847e+06	7.06724e+06	7.268e+06	6.31388e+06
821	25.8511	267.143	2.03451e+06	8.51385e+06	7.60469e+06	4.91297e+06	4.03736e+06	4.58897e+06	0	4.79463e+06	0	5.89557e+06	1.53556e+06	4.71633e+06	4.37442e+06	1.31828e+07	1.07387e+07	4.38826e+06	7.06147e+06	3.32186e+06	1.37449e+07	3.92153e+06	6.89275e+06	7.13748e+06	3.54952e+06
822	25.9089	463.288	2.23309e+06	4.01301e+06	4.49132e+06	5.71363e+06	6.54111e+06	1.38629e+07	2.04389e+06	1.21656e+07	1.86023e+07	6.07433e+06	3.939e+07	2.46892e+07	7.5849e+06	2.4425e+06	2.22285e+06	5.76431e+06	5.96918e+06	7.95626e+06	9.98814e+06	8.38398e+06	6.66337e+06	1.33882e+07	7.30376e+06
823	25.9671	932.616	2.69458e+06	0	3.07545e+06	2.09191e+06	4.11076e+06	1.87077e+06	3.52399e+06	4.07981e+06	9.30681e+06	3.68367e+06	5.87133e+06	7.64249e+06	1.89704e+06	952580	1.8177e+06	5.62132e+06	2.84134e+06	4.78017e+06	5.01539e+06	5.44308e+06	4.1988e+06	3.95009e+06	4.92208e+06
824	26.0535	188.045	1.45783e+07	9.06504e+06	1.17662e+08	1.17337e+06	1.24048e+08	5.09303e+07	1.17384e+08	4.10859e+07	7.35858e+07	1.67698e+08	9.15269e+07	9.11756e+07	7.83444e+07	1.68056e+07	4.89903e+06	4.7204e+07	3.53437e+07	1.50622e+08	8.06328e+06	5.12597e+06	4.42313e+07	4.35774e+07	4.68736e+07
825	26.7594	397.226	6.85843e+06	1.73793e+07	7.63898e+06	9.34016e+06	7.28134e+06	1.24703e+07	0	5.77033e+06	4.71106e+06	1.48294e+07	883942	1.22391e+07	1.10356e+07	1.93991e+07	5.05031e+06	4.1014e+06	1.59423e+06	9.75598e+06	4.36812e+07	1.12479e+07	1.09248e+07	1.18516e+07	6.60891e+06
826	27.2906	164.899	878116	889248	0	700592	2.80956e+06	0	0	5.0214e+06	0	1.00169e+06	1.73281e+06	1.59247e+06	8.15366e+06	1.47692e+07	7.41826e+06	1.6014e+06	6.53705e+06	4.61562e+06	5.79965e+06	4.77604e+06	201558	2.19134e+06	2.905e+06
827	27.4405	327.18	1.39825e+08	1.39249e+08	1.4854e+08	1.3782e+08	1.0058e+08	1.42293e+08	1.33853e+08	1.14359e+08	7.61851e+07	1.01293e+08	6.51419e+07	1.52753e+07	2.2916e+07	5.77582e+07	9.26433e+07	6.93968e+07	9.5071e+07	7.06344e+07	3.15263e+07	1.44679e+06	9.57556e+07	9.93428e+07	1.09227e+08
828	27.4529	543.336	2.25507e+07	1.53014e+07	1.20542e+07	1.16679e+07	1.50474e+07	0	7.42493e+06	2.87135e+06	4.50959e+06	2.80599e+07	0	0	0	0	0	0	0	0	0	0	6.40062e+06	7.29208e+06	8.60099e+06
829	27.5627	341.196	9.91757e+07	1.05521e+08	1.03233e+08	1.01783e+08	6.63167e+07	1.07437e+08	9.84082e+07	8.59554e+07	6.29303e+07	9.15917e+07	5.738e+07	1.65513e+07	2.01914e+07	4.0803e+07	9.25881e+07	5.99126e+07	8.98417e+07	7.51957e+07	2.73701e+07	2.79917e+07	7.49942e+07	7.97659e+07	8.2519e+07
830	27.6107	340.203	5.66134e+08	5.88072e+08	5.58843e+08	5.53226e+08	3.80777e+08	5.80745e+08	5.15296e+08	4.30177e+08	3.40856e+08	5.05099e+08	3.18504e+08	8.3722e+07	1.13854e+08	2.20879e+08	4.93231e+08	3.26113e+08	4.73589e+08	3.7692e+08	1.43831e+08	1.56735e+08	4.21916e+08	4.19716e+08	4.402e+08
831	27.6174	126.904	0	2.63469e+06	4.11997e+06	4.51091e+06	8.61784e+06	2.37773e+06	2.40469e+06	8.05792e+06	6.75916e+06	2.78261e+07	9.68136e+07	1.73932e+07	3.5308e+07	4.83058e+06	1.24491e+07	4.47206e+07	1.47801e+07	1.71205e+07	2.59667e+07	5.12311e+07	1.03737e+07	9.51636e+06	9.82487e+06
832	27.6536	162.902	1.84928e+06	2.41014e+06	1.0711e+06	793066	2.511e+06	2.39673e+06	0	9.19088e+06	4.24542e+06	3.35757e+06	4.63857e+06	1.23142e+07	1.14542e+07	2.34461e+07	1.03032e+07	3.3928e+06	1.01013e+07	4.32408e+06	1.55903e+07	9.54375e+06	6.50661e+06	3.86706e+06	5.99429e+06
833	27.7123	261.08	6.46788e+06	3.31687e+07	7.1462e+06	1.44882e+07	1.43062e+07	0	9.64989e+06	0	3.47423e+06	2.1103e+07	0	0	0	0	0	0	0	0	0	0	4.4849e+06	6.60038e+06	5.45938e+06
834	27.9646	326.188	6.99205e+08	6.87795e+08	6.83581e+08	6.53287e+08	4.73586e+08	6.89682e+08	6.38821e+08	5.51967e+08	3.64082e+08	4.80843e+08	3.06443e+08	9.52587e+07	1.19366e+08	2.70684e+08	4.31475e+08	3.16944e+08	4.48635e+08	3.55087e+08	1.50001e+08	1.70563e+08	4.92951e+08	4.92456e+08	4.81222e+08
835	28.2173	313.164	1.56991e+08	1.4781e+08	1.66024e+08	1.35474e+08	1.058e+08	1.50032e+08	1.48992e+08	1.15586e+08	8.85343e+07	8.47951e+07	2.3934e+07	1.52398e+07	1.89269e+07	3.96774e+07	3.55662e+07	3.05639e+07	3.44487e+07	2.87198e+07	2.325e+07	2.43247e+07	1.02243e+08	9.6222e+07	9.87087e+07
836	28.2293	259.1	0	1.75497e+08	0	0	0	0	0	0	0	0	842864	0	0	0	0	0	0	2.99219e+06	0	0	1.00165e+07	1.02209e+07	1.01794e+07
837	28.5032	312.171	6.77051e+08	6.55602e+08	6.96856e+08	6.04858e+08	4.85817e+08	6.84473e+08	6.64615e+08	5.54184e+08	3.68285e+08	3.98719e+08	1.13126e+08	6.62924e+07	8.25965e+07	1.84833e+08	1.58061e+08	1.2969e+08	1.46375e+08	1.18158e+08	9.26336e+07	1.17659e+08	4.10785e+08	4.14601e+08	4.4187e+08
838	28.5032	337.184	3.8851e+07	3.37194e+07	4.3522e+07	3.22082e+07	2.71666e+07	4.02373e+07	3.47677e+07	2.74322e+07	2.1828e+07	1.9308e+07	8.96519e+06	5.03255e+06	5.67239e+06	7.67948e+06	1.41271e+07	1.03613e+07	1.1388e+07	1.18728e+07	1.57282e+07	8.91027e+06	2.18656e+07	2.23916e+07	2.95344e+07
839	28.7802	298.156	2.20049e+08	2.05484e+08	2.3627e+08	1.83598e+08	1.65022e+08	2.41542e+08	2.15395e+08	1.95009e+08	1.18027e+08	1.25715e+08	1.82069e+07	1.84426e+07	1.99916e+07	5.43876e+07	2.46702e+07	2.77885e+07	2.22094e+07	1.81907e+07	2.39261e+07	2.97179e+07	1.32529e+08	1.41768e+08	1.38469e+08
840	28.8426	323.168	4.86842e+07	4.4946e+07	5.95481e+07	3.83471e+07	3.22763e+07	4.80658e+07	4.37028e+07	3.09788e+07	1.92685e+07	2.91929e+07	4.83153e+06	1.88565e+06	1.48846e+06	9.44717e+06	6.98604e+06	8.97677e+06	1.03135e+07	8.58131e+06	2.4493e+06	5.00727e+06	2.68153e+07	2.54168e+07	2.66069e+07
841	29.0724	213.005	3.27874e+07	1.65727e+07	2.92177e+07	6.45401e+06	5.91452e+07	4.08621e+07	1.04736e+07	1.01362e+07	8.96219e+06	1.25784e+07	153629	3.34501e+06	2.44326e+06	6.25839e+06	1.83708e+06	1.25143e+06	4.05085e+06	2.94463e+07	1.77577e+07	2.68577e+07	1.57292e+07	1.74116e+07	1.98277e+07
842	29.1663	283.137	3.09195e+07	2.91773e+07	3.94567e+07	2.68356e+07	2.44102e+07	4.14777e+07	3.24976e+07	2.86925e+07	1.7284e+07	1.80287e+07	329977	1.65071e+06	1.06037e+06	6.63017e+06	2.55261e+06	3.93218e+06	7.00086e+06	1.69283e+06	2.39808e+06	1.92465e+06	2.18959e+07	1.77674e+07	1.97089e+07
843	29.439	213.997	1.45672e+07	5.77572e+06	1.43847e+07	0	3.05213e+07	1.88759e+07	1.83615e+06	4.88724e+06	3.71165e+06	1.37176e+06	455531	2.81136e+06	8.42798e+06	2.90336e+06	2.99772e+06	3.83425e+06	2.24429e+06	1.33707e+07	3.26487e+06	1.32577e+07	4.00424e+06	8.84995e+06	9.95432e+06
844	29.439	299.148	5.53321e+07	4.96402e+07	6.36109e+07	4.15066e+07	4.04944e+07	4.69125e+07	5.41159e+07	4.5978e+07	1.61217e+07	2.58919e+07	7.458e+06	2.35507e+06	5.29744e+06	1.03682e+07	5.69011e+06	7.73164e+06	2.53689e+06	7.53012e+06	5.94472e+06	5.13641e+06	3.40202e+07	3.44196e+07	2.42363e+07
845	29.4427	226.977	4.78181e+06	2.15328e+07	1.12227e+06	1.43699e+07	1.02746e+07	1.94027e+07	1.16726e+07	2.65659e+07	1.27129e+07	2.80669e+07	4.60471e+07	1.57713e+07	5.84039e+07	4.71437e+07	5.55105e+07	4.06321e+07	4.70504e+07	4.74362e+07	2.8875e+07	4.77974e+07	2.84927e+07	2.6442e+07	3.12697e+07
846	29.481	309.152	4.5374e+07	3.31499e+07	4.58424e+07	3.44482e+07	3.51094e+07	4.44864e+07	2.41064e+07	3.34106e+07	2.43919e+07	2.08721e+07	1.53378e+06	1.38883e+07	6.29581e+06	4.23477e+06	4.91246e+06	3.41814e+06	2.94683e+06	2.1502e+06	3.63451e+07	9.86409e+06	2.43365e+07	2.25445e+07	2.36374e+07
847	29.6277	369.174	1.5668e+07	1.19385e+07	1.96917e+07	8.00904e+06	1.313e+07	2.19781e+07	1.04309e+07	1.95105e+06	3.33211e+06	1.58957e+07	1.00413e+06	2.3903e+06	2.30682e+06	5.34343e+06	244833	1.24521e+07	1.98099e+06	6.6923e+06	1.68119e+07	2.31911e+06	9.07167e+06	9.04206e+06	6.65378e+06
848	30.0202	265.002	9.185e+06	2.11151e+07	3.73559e+06	2.39474e+07	2.91761e+07	0	2.25684e+06	635989	1.88246e+07	1.37943e+07	0	0	0	0	0	0	0	0	0	0	5.67309e+06	6.58605e+06	6.38159e+06
849	30.1584	182.996	1.0731e+07	1.95538e+07	7.95042e+07	5.69547e+07	3.78931e+07	1.73329e+07	3.78397e+07	7.88182e+07	2.76241e+07	3.90091e+07	523810	0	1.75661e+06	1.67033e+06	2.51115e+06	0	0	3.24026e+06	0	2.80084e+06	2.13782e+07	2.4205e+07	2.43936e+07
850	30.2214	112.655	1.51993e+07	1.49898e+07	2.32222e+06	2.0195e+07	1.74597e+07	1.27564e+07	1.14207e+07	9.92759e+06	1.17043e+07	1.78027e+07	4.51203e+07	1.93277e+07	4.63299e+07	4.97932e+07	3.71107e+07	4.07406e+07	1.65323e+07	2.50641e+07	9.48214e+06	3.74794e+07	1.90777e+07	2.43123e+07	2.05286e+07
851	30.2786	255.087	1.1334e+06	0	4.53937e+06	1.23413e+06	2.46302e+06	4.14184e+06	0	3.44171e+06	0	726813	1.02089e+06	1.05657e+07	2.90039e+06	4.43702e+06	4.57079e+06	5.18213e+06	2.85632e+06	6.67679e+06	8.0285e+06	2.61807e+06	875539	1.48369e+06	1.89664e+06
852	30.2788	113.315	7.85406e+06	1.33919e+07	3.07197e+06	1.93767e+07	1.77207e+07	2.77272e+07	7.45513e+06	2.20021e+07	1.4623e+07	1.29113e+07	4.63833e+07	1.98445e+07	4.6187e+07	5.29688e+07	3.71285e+07	4.27171e+07	1.25722e+07	3.82146e+07	1.01446e+07	3.57035e+07	2.03462e+07	2.14063e+07	1.53046e+07
853	30.279	112.984	2.03769e+09	2.50472e+09	6.03759e+08	2.30277e+09	1.71102e+09	2.44704e+09	2.15596e+09	2.75421e+09	1.93371e+09	3.10307e+09	4.25029e+09	2.59912e+09	5.06231e+09	4.54741e+09	4.64339e+09	3.69949e+09	4.46142e+09	4.10518e+09	3.34891e+09	4.26702e+09	3.10482e+09	3.12872e+09	3.1676e+09
854	30.3676	114.988	1.98907e+07	8.06867e+06	1.53539e+06	4.09177e+06	5.51819e+06	5.551e+06	3.25751e+06	5.4752e+06	2.62168e+06	4.09787e+06	1.4925e+07	8.07505e+06	2.13787e+07	1.705e+07	1.62618e+07	1.10099e+07	1.70268e+07	1.56591e+07	1.30227e+07	1.7603e+07	1.18599e+07	7.19939e+06	7.65173e+06
855	30.3689	113.988	4.02736e+07	5.12129e+07	1.23009e+07	5.20532e+07	3.77441e+07	4.94101e+07	4.68434e+07	5.76918e+07	3.9828e+07	6.21305e+07	9.29723e+07	4.76209e+07	1.02364e+08	9.4695e+07	9.32228e+07	7.67194e+07	9.61358e+07	8.69875e+07	7.10371e+07	8.94817e+07	6.60239e+07	6.84197e+07	6.5022e+07
856	30.3734	291	0	1.17777e+08	9.25034e+06	4.16521e+06	1.39164e+07	6.4877e+06	6.53348e+06	4.30608e+06	5.45161e+06	445245	0	0	0	0	0	0	0	0	0	0	6.03002e+06	9.59617e+06	8.02763e+06
857	30.378	453.253	1.13011e+07	2.58825e+07	2.75421e+07	3.77298e+07	5.05861e+07	4.67679e+07	2.93059e+07	1.00609e+08	1.59036e+06	0	0	1.00558e+07	7.27196e+06	4.78625e+06	0	0	0	126207	9.20581e+06	7.03449e+06	2.58892e+07	2.34574e+07	2.27591e+07
858	30.5606	239.059	2.27295e+06	2.20374e+06	3.64474e+06	4.13514e+06	3.65554e+06	995191	1.66051e+06	3.12904e+06	3.59616e+06	3.82073e+06	2.94111e+06	2.75807e+06	259477	2.91816e+06	0	2.894e+06	93990.8	2.9116e+06	459796	233885	6.71823e+06	8.70552e+06	1.03013e+07
859	30.7807	197.081	9.16662e+06	5.83684e+06	7.82803e+06	6.46086e+06	7.49366e+06	4.85059e+06	8.154e+06	5.38229e+06	2.74174e+06	1.03548e+07	9.69749e+06	1.76086e+07	1.01492e+07	7.04707e+06	1.53306e+07	1.08755e+07	9.07364e+06	9.05805e+06	1.8126e+07	8.66557e+06	6.8159e+06	6.33188e+06	6.29247e+06
860	30.9298	165.04	1.09372e+06	7.64977e+06	9.46933e+06	9.90677e+06	9.85229e+06	5.80915e+06	2.01647e+06	1.69612e+06	6.59686e+06	4.14276e+06	322042	4.60878e+06	1.22651e+06	668917	1.20543e+06	708267	1.53439e+06	2.00308e+06	1.53849e+06	907960	4.91402e+06	8.00726e+06	8.69764e+06
861	31.0489	203.036	1.20378e+06	3.98529e+06	1.34294e+07	1.38595e+07	9.02511e+06	3.81131e+06	8.85326e+06	2.69591e+06	4.65591e+06	5.46472e+06	615983	1.69273e+06	397436	258946	0	885512	121431	3.08613e+06	4.74881e+06	193962	2.17718e+06	2.84644e+06	2.61841e+06
862	31.074	223.028	2.17522e+06	2.64384e+06	847953	0	971481	0	1.53412e+07	9.35395e+06	4.37572e+06	5.24085e+06	598568	3.03395e+06	660544	0	137966	237340	801160	509762	2.04492e+06	189913	4.70975e+06	7.00223e+06	6.88306e+06
863	31.2105	126.952	5.40315e+06	5.3692e+07	1.88495e+07	5.03977e+06	1.75607e+07	6.71052e+06	2.30279e+06	7.71089e+06	5.71811e+07	2.16908e+07	0	320642	0	224568	0	0	0	0	0	0	1.26898e+07	1.31601e+07	1.35383e+07
864	31.2506	244.101	0	0	0	0	0	0	0	0	1.07006e+06	0	1.14933e+07	3.98937e+06	5.93173e+06	6.52325e+06	1.56072e+07	1.88412e+07	7.62951e+06	2.77204e+07	8.19458e+06	3.78609e+06	4.30211e+06	7.25794e+06	5.56446e+06
865	31.2528	281.121	4.38087e+06	4.47266e+06	7.63361e+06	3.77183e+06	6.22183e+06	8.13078e+06	4.61534e+06	5.53444e+06	4.21447e+06	3.164e+06	1.2129e+06	947152	160324	912182	598469	715907	571082	1.11897e+06	344630	725707	3.11176e+06	2.95082e+06	3.39157e+06
866	31.2998	251.022	1.06842e+07	8.01168e+07	3.476e+07	8.74889e+06	3.07382e+07	9.77265e+07	1.54207e+07	1.17329e+07	8.12909e+06	5.40263e+07	6.43659e+06	1.14841e+08	1.48329e+07	204136	945385	6.01822e+06	2.13982e+07	5.11859e+06	5.7108e+06	0	2.90072e+07	2.87775e+07	3.11894e+07
867	31.3144	209.012	2.13454e+06	7.17794e+06	5.43783e+06	4.52685e+06	3.89053e+06	5.83374e+06	3.03246e+06	3.47622e+06	1.93374e+07	5.27177e+06	531268	94466.2	0	0	0	0	0	183389	0	634374	3.36647e+06	4.12635e+06	3.12413e+06
868	31.3226	273.007	3.07682e+06	8.71131e+06	2.67139e+07	9.28654e+06	1.42299e+07	2.42004e+06	2.97086e+06	3.57316e+06	9.852e+06	5.09758e+06	0	0	0	0	0	0	0	0	0	0	4.24898e+06	4.25854e+06	5.22046e+06
869	31.3237	425.22	0	1.37287e+06	4.10644e+06	1.72213e+06	703887	3.47027e+06	0	1.372e+07	0	251983	156997	2.3824e+06	1.18854e+06	1.00064e+06	0	0	0	130253	1.35844e+06	383458	3.0216e+06	2.51015e+06	1.33257e+06
870	31.4162	353.126	2.1976e+07	2.14937e+07	3.44968e+07	8.93678e+06	3.19674e+07	6.23746e+07	1.34852e+07	4.60967e+07	1.24933e+06	579388	261165	2.63815e+06	5.95271e+06	2.91775e+06	321042	555603	876896	794523	2.06122e+06	1.08144e+06	1.46665e+07	1.43962e+07	1.52995e+07
871	31.4347	320.234	1.79928e+08	1.88129e+08	2.70376e+08	2.67751e+08	1.51908e+08	1.7932e+08	2.15336e+08	2.0255e+08	2.68837e+08	3.92372e+07	258687	0	0	0	685969	0	512324	161692	0	0	1.17915e+08	1.13927e+08	1.12288e+08
872	31.5117	249.043	2.34681e+08	5.12134e+07	6.87359e+07	5.73117e+07	4.92584e+07	1.85161e+07	2.00378e+08	5.29297e+07	7.34149e+07	3.14265e+07	4.12238e+07	3.02887e+06	4.8495e+06	1.51456e+06	3.21871e+06	3.43185e+07	4.18188e+06	2.49415e+06	8.02824e+06	6.38702e+06	2.07525e+07	1.82992e+07	2.01277e+07
873	31.5374	306.218	1.77455e+08	2.03244e+08	2.7591e+08	2.88377e+08	1.60928e+08	2.18977e+08	2.17054e+08	2.40635e+08	2.92947e+08	3.96631e+07	193167	102929	0	0	743577	0	1.06137e+06	327686	376142	0	1.17877e+08	1.36624e+08	1.2876e+08
874	31.6438	277.002	1.7615e+06	1.08733e+07	2.07618e+07	1.19647e+06	7.9773e+06	2.76837e+06	378385	6.89505e+06	1.90949e+07	5.1032e+06	0	0	0	0	0	0	0	0	0	0	1.2218e+06	470632	1.7722e+06
875	31.6438	286.986	2.45376e+06	4.12523e+06	4.83937e+06	309247	3.72329e+06	1.97201e+06	0	1.51658e+07	1.87119e+07	2.20985e+06	0	2.51394e+06	0	0	0	0	0	0	0	246413	2.09164e+06	1.3222e+06	1.44703e+06
876	31.6438	307.211	3.47987e+07	3.89628e+07	6.28763e+07	6.79769e+07	3.72852e+07	4.29784e+07	4.257e+07	5.07268e+07	7.06682e+07	8.51489e+06	172268	642939	697526	790692	549737	674011	215702	524884	541093	311395	2.63572e+07	2.89141e+07	2.53757e+07
877	31.809	154.998	2.23548e+06	417167	4.7104e+06	3.02991e+06	3.35854e+06	2.18799e+06	1.20091e+06	656829	2.22012e+06	0	1.41775e+07	2.13066e+07	9.25314e+06	1.40371e+07	1.11891e+07	1.19181e+07	9.13273e+06	1.3503e+07	1.79967e+07	1.18873e+07	9.6297e+06	9.05031e+06	8.46959e+06
878	31.816	321.227	3.41321e+07	3.30884e+07	5.24469e+07	5.2151e+07	3.21442e+07	3.51747e+07	4.36708e+07	3.84427e+07	5.61577e+07	2.6131e+06	609349	981220	282555	326338	438291	0	561219	562466	559882	525023	2.20184e+07	2.42213e+07	1.73864e+07
879	32.0085	355.194	4.718e+07	5.45764e+06	1.17292e+07	8.74493e+06	7.00348e+06	9.07535e+06	2.49348e+06	6.78531e+06	2.20005e+06	6.88724e+06	2.93506e+06	1.10713e+06	917398	1.98077e+06	2.92214e+06	1.56449e+06	3.18789e+06	3.85726e+06	1.27642e+06	1.25411e+06	1.48337e+06	832381	6.19493e+06
880	32.0541	192.981	469306	7.71542e+06	916627	6.51636e+06	2.10412e+07	548556	2.43293e+06	6.56684e+06	1.37736e+07	2.93911e+06	1.59714e+06	1.72706e+06	1.0238e+06	2.34825e+06	0	1.5993e+06	456687	9.07926e+07	6.00659e+06	2.75772e+06	8.23858e+06	9.14958e+06	9.69682e+06
881	32.0877	211.097	1.84048e+06	1.37711e+06	3.88989e+06	938380	1.6929e+06	746209	2.91535e+06	0	1.74203e+06	1.86966e+06	4.4539e+06	8.39533e+06	3.53584e+06	3.80242e+06	4.37437e+06	7.08427e+06	3.14329e+06	3.59997e+06	7.00639e+06	2.92548e+06	3.23693e+06	2.19207e+06	3.45209e+06
882	32.1303	183.986	0	0	0	0	464597	0	0	4.44106e+07	392405	296803	0	0	0	0	182466	0	0	0	0	0	2.33014e+06	2.78189e+06	2.30747e+06
883	32.1373	305.215	1.09861e+09	1.19273e+09	1.61468e+09	1.77158e+09	9.57134e+08	1.30333e+09	1.28879e+09	1.41541e+09	1.77788e+09	2.39654e+08	5.42724e+06	1.84982e+06	688834	1.04859e+06	5.09302e+06	2.42176e+06	1.28098e+07	5.10437e+06	4.51187e+06	1.99703e+06	7.4203e+08	8.13583e+08	7.71121e+08
884	32.4479	273.984	7.21435e+06	633178	9.88231e+06	2.79813e+06	1.11085e+07	5.22026e+06	1.89422e+06	6.50458e+06	3.51512e+06	8.78622e+06	0	104182	0	0	0	0	0	0	0	0	4.23289e+06	4.42434e+06	3.78202e+06
885	32.5997	173.986	0	1.44442e+06	3.33746e+06	1.27723e+06	1.89411e+06	1.85983e+06	522043	0	6.25258e+06	1.4996e+06	353015	0	0	523690	0	0	0	467064	692337	2.16185e+06	1.07687e+06	2.284e+06	2.1163e+06
886	32.9414	285.171	0	0	0	0	0	0	0	0	0	0	875106	1.65206e+06	1.09236e+06	1.50168e+06	791989	1.39619e+06	1.04583e+06	1.25096e+06	1.46643e+06	358966	340069	268050	0
887	32.9541	233.012	413175	6.08558e+06	1.10281e+07	2.2968e+07	4.44303e+06	3.79465e+06	749724	1.88317e+07	2.52922e+06	1.33865e+06	2.0352e+06	339898	192936	468552	1.31191e+06	563195	449547	7.65763e+06	6.25422e+06	1.14317e+07	5.12476e+06	6.26169e+06	4.37408e+06
888	32.9668	139.006	9.07005e+06	3.52573e+07	3.34955e+07	4.19058e+07	4.22513e+07	1.41751e+07	1.81947e+07	9.15966e+06	2.65305e+08	4.20645e+07	8.43635e+06	5.99514e+06	6.25234e+06	1.48033e+07	8.05348e+06	6.11793e+06	1.02564e+07	7.04693e+06	7.91855e+06	5.22858e+06	3.48812e+07	3.81178e+07	3.49176e+07
889	33.015	596.525	2.27287e+07	1.29874e+07	5.84454e+06	8.11774e+06	1.80419e+07	1.50032e+07	727497	1.05637e+07	1.06628e+07	1.36837e+07	7.07846e+06	5.19499e+06	2.60248e+06	2.17319e+06	1.22557e+06	4.48652e+06	2.10747e+06	4.87061e+06	3.9245e+06	6.41628e+06	7.14711e+06	7.34022e+06	7.37225e+06
890	33.0192	289.037	224345	2.9921e+06	3.97103e+07	840138	2.99836e+06	2.54598e+06	3.19266e+06	3.41839e+06	0	5.66482e+06	0	0	0	0	0	0	0	0	0	0	354207	991386	0
891	33.0192	293.195	1.83353e+07	1.85743e+07	3.06195e+07	3.72885e+07	2.02187e+07	2.73692e+07	2.08456e+07	2.74914e+07	3.5496e+07	3.99583e+06	1.80484e+06	3.24209e+06	2.22852e+06	2.38643e+06	2.3545e+06	2.75266e+06	826843	2.12174e+06	4.82193e+06	1.50647e+06	9.90026e+06	1.63058e+07	1.50597e+07
892	33.0694	84.95	1.31643e+07	1.23338e+07	8.29111e+06	5.08676e+06	1.05614e+07	1.47504e+07	7.54962e+06	3.19398e+07	1.98076e+06	2.06981e+06	5.75456e+06	5.04667e+06	1.194e+07	7.76965e+06	5.20223e+06	2.80302e+06	6.6859e+06	4.18679e+06	5.37416e+06	3.43357e+06	9.98635e+06	9.21345e+06	9.5358e+06
893	33.0694	292.203	7.13358e+07	8.12178e+07	1.21486e+08	1.40826e+08	7.57284e+07	1.05144e+08	8.59915e+07	1.1438e+08	1.39341e+08	1.77586e+07	0	0	0	0	794074	0	1.83616e+06	171602	172580	79295.6	5.45951e+07	6.40994e+07	5.75725e+07
894	33.0756	82.9529	4.13364e+07	3.35487e+07	2.07579e+07	1.68444e+07	2.91563e+07	4.47477e+07	2.1703e+07	9.12556e+07	5.08717e+06	6.76013e+06	1.76751e+07	1.26114e+07	2.99185e+07	2.04234e+07	1.51651e+07	8.6162e+06	1.82623e+07	1.18827e+07	1.34483e+07	8.6767e+06	3.03013e+07	2.60654e+07	2.54745e+07
895	33.1621	279.18	1.47063e+08	1.40408e+06	6.56446e+06	7.59413e+06	4.5033e+06	4.25112e+06	2.98588e+06	5.12813e+06	8.92168e+06	7.1506e+06	226305	0	0	0	122299	594868	336629	962872	639373	103350	3.47711e+07	2.66865e+06	2.83423e+06
896	33.2426	185.081	0	566067	398574	0	0	945700	0	0	429069	0	5.57594e+07	8.16743e+07	4.20581e+07	4.72173e+07	4.99435e+07	6.63658e+07	4.29255e+07	6.44466e+07	8.16296e+07	3.87347e+07	2.42167e+07	2.53449e+07	2.60206e+07
897	33.264	188.985	5.7553e+07	3.56703e+08	2.63983e+08	1.90385e+08	1.73468e+08	1.37486e+08	6.33944e+07	1.93585e+08	2.58384e+08	9.16107e+07	1.20376e+06	3.03613e+06	1.11358e+06	2.72307e+07	5.93659e+06	298061	1.84845e+06	1.19197e+07	3.07759e+06	1.56643e+08	1.07557e+08	1.17409e+08	1.13565e+08
898	33.6935	195.029	6.58639e+06	1.19917e+07	3.50834e+07	1.81016e+07	1.84211e+07	1.08775e+07	1.28848e+07	4.18149e+06	1.88515e+07	7.06347e+06	8.97479e+06	7.86187e+06	8.54735e+06	1.2754e+07	8.65562e+06	8.81492e+06	7.90489e+06	7.79088e+06	1.02319e+07	1.17854e+07	1.42414e+07	1.125e+07	1.30764e+07
899	33.8362	278.187	1.63337e+07	1.80485e+07	3.02113e+07	3.78822e+07	1.9444e+07	2.91959e+07	1.45824e+07	3.1452e+07	3.99248e+07	3.67484e+06	92986.3	199923	0	260413	318777	466673	1.80854e+06	124433	0	174169	1.33731e+07	1.59544e+07	1.57212e+07
900	33.971	218.996	1.35111e+08	3.43492e+08	3.54223e+08	1.33029e+08	2.46183e+08	1.58291e+08	2.82213e+08	5.03063e+08	1.48313e+08	1.4161e+08	1.19471e+06	1.94471e+07	1.78245e+06	1.25817e+07	543469	1.35985e+06	2.99459e+07	2.83129e+07	3.40712e+07	2.16996e+07	1.28005e+08	1.4997e+08	1.45987e+08
901	34.05	79.9561	2.73167e+06	1.24549e+07	8.6187e+06	1.39635e+07	1.34907e+07	4.0413e+06	1.01569e+07	4.31842e+06	2.24684e+07	6.31622e+06	1.78895e+06	1.40037e+06	1.93634e+06	2.00807e+06	1.78618e+06	579148	2.51359e+06	3.36859e+06	2.48087e+06	1.40261e+06	7.62862e+06	8.90301e+06	1.62977e+07
902	34.4796	124.99	2.61e+07	5.71729e+07	2.78595e+07	3.95127e+07	4.54811e+07	2.8818e+07	8.1531e+07	1.55892e+07	5.95039e+07	8.89773e+07	1.24016e+07	2.78076e+06	1.07338e+07	6.49265e+06	1.26165e+07	6.00819e+06	1.58711e+07	1.09459e+07	4.033e+06	3.18952e+06	3.01883e+07	3.06232e+07	2.60924e+07
903	34.8244	235.027	7.07841e+06	3.57447e+06	2.37116e+07	1.0979e+07	1.42861e+07	2.47813e+07	3.18491e+07	1.87838e+07	1.0902e+07	1.45117e+07	2.91177e+07	2.47259e+07	2.26117e+07	1.00339e+07	7.6539e+06	2.4259e+07	2.26883e+07	2.73091e+07	2.97072e+07	1.14947e+07	2.28238e+07	2.31089e+07	2.26913e+07
904	35.3642	153.091	186504	652203	1.47852e+06	2.26451e+06	2.24283e+06	933030	0	434125	593884	1.29352e+06	3.96001e+06	5.68644e+06	3.39356e+06	3.08932e+06	3.48353e+06	6.38371e+06	3.26501e+06	5.91415e+06	5.28013e+06	2.53787e+06	526676	1.5158e+06	1.19078e+06
905	35.3642	239.128	1.04391e+06	3.79452e+06	5.59546e+06	3.25132e+06	2.60306e+06	6.36784e+06	263975	1.23408e+06	1.03529e+06	2.17948e+06	6.02173e+06	9.84231e+06	6.55856e+06	5.37274e+06	5.3924e+06	7.81958e+06	6.64211e+06	6.33266e+06	1.28745e+07	9.55422e+06	767191	1.90581e+06	516168
906	35.4582	127.075	0	0	0	0	0	0	0	0	0	0	6.50377e+06	8.92936e+06	4.75217e+06	6.33093e+06	4.48644e+06	6.13888e+06	5.84802e+06	7.33157e+06	8.57682e+06	5.03937e+06	655580	1.10842e+06	326122
907	35.4948	434.347	5.95911e+06	4.2052e+06	5.89066e+06	7.18467e+06	4.78402e+06	9.55738e+06	1.81529e+06	7.3408e+06	843086	1.77625e+06	0	0	0	0	311295	0	0	250524	0	117660	3.82383e+06	3.40115e+06	3.51521e+06
908	35.5857	249.152	0	1.10522e+06	3.68407e+06	610602	2.50634e+06	2.7146e+06	851647	1.0201e+06	4.88419e+06	5.04158e+06	4.16902e+06	2.36975e+07	3.41408e+06	3.29695e+06	4.47448e+06	4.84845e+06	2.92136e+06	3.86844e+06	5.44207e+06	5.41781e+06	4.65344e+06	4.28185e+06	4.31557e+06
909	35.5857	267.123	1.57621e+06	862189	828032	249245	1.16885e+06	273075	148578	0	531428	717672	2.17081e+06	2.08652e+06	1.36234e+06	1.50291e+06	588342	4.05967e+06	1.86006e+06	3.08131e+06	1.78265e+06	1.46919e+06	1.23914e+06	656896	609462
910	35.8576	192.077	3.62615e+06	8.88894e+06	7.89135e+06	2.5836e+07	1.60549e+07	0	1.26328e+07	467968	6.93175e+06	9.08086e+06	118741	0	0	0	125496	176410	0	0	0	0	6.24815e+06	5.17765e+06	5.93381e+06
911	35.8589	241.107	3.80049e+06	0	1.70409e+06	3.82105e+06	292870	1.06564e+06	4.09181e+06	0	1.02688e+06	719321	2.03805e+06	3.4072e+06	1.29881e+06	1.96309e+06	1.64065e+06	1.20515e+06	1.09169e+06	1.90691e+06	2.95998e+06	1.37757e+06	1.52546e+06	193917	1.27939e+06
912	36.1865	171.011	1.28719e+08	1.30535e+08	9.341e+07	8.63177e+07	1.21257e+08	2.86148e+08	6.89385e+07	2.61966e+08	3.21263e+06	2.3549e+06	3.18058e+08	6.98376e+08	5.15915e+08	7.8285e+08	3.28719e+08	1.59064e+08	4.34758e+08	2.28348e+08	7.44744e+08	3.83198e+08	2.40645e+08	2.46477e+08	2.3704e+08
913	36.2427	329.248	9.61027e+06	3.47559e+06	0	458504	899716	1.80054e+07	8.57458e+06	371055	2.33835e+06	5.59733e+06	1.85212e+06	1.52934e+06	1.48398e+06	1.26829e+06	1.19744e+06	2.84197e+06	912705	1.45441e+06	2.06527e+06	906821	3.26798e+06	2.95929e+06	3.03088e+06
914	36.4612	773.532	623641	0	1.75253e+06	1.80396e+06	4.56344e+06	0	282441	0	1.07981e+07	5.59373e+06	2.44882e+06	5.53276e+06	1.6786e+06	1.10205e+06	486318	2.4064e+06	1.83507e+06	4.33378e+06	1.71371e+06	1.3306e+06	3.06553e+06	3.99598e+06	1.29218e+06
915	36.4663	93.0334	4.84063e+07	1.87024e+07	8.65703e+07	4.80135e+07	2.62052e+07	2.92541e+07	2.52318e+07	5.44301e+07	4.22322e+07	3.67014e+07	1.48865e+07	2.13561e+07	1.36584e+07	1.56172e+07	4.63038e+07	1.07032e+07	3.04906e+07	3.14385e+07	3.29677e+07	2.19123e+07	3.89699e+07	3.80147e+07	3.46443e+07
916	36.5406	539.503	3.45483e+06	7.4971e+06	3.69526e+06	6.87031e+06	976002	2.54872e+06	718283	2.01115e+06	590028	887062	0	314432	0	0	0	363948	212148	311534	411882	0	3.06539e+06	1.20203e+06	1.47991e+06
917	36.5755	377.246	2.04171e+07	2.09587e+06	0	0	552397	6.38765e+07	277834	6.15588e+06	125763	464319	157171	0	182517	255422	0	0	0	0	0	1.30615e+06	4.44204e+06	5.77385e+06	2.02595e+06
918	36.5988	393.373	5.27307e+06	9.68631e+06	852488	1.80357e+06	3.80456e+06	1.89478e+06	2.1935e+06	8.26562e+06	8.48293e+06	4.80649e+06	1.22691e+06	4.34468e+06	774575	594171	179368	4.71172e+06	689788	1.4865e+06	942850	2.09171e+06	3.86932e+06	3.81037e+06	4.11999e+06
919	36.6082	257.239	1.42978e+07	2.43616e+07	7.77555e+06	2.0882e+07	5.39487e+06	1.05532e+07	1.19711e+07	6.97055e+06	5.4755e+06	1.72505e+06	4.6826e+06	4.49155e+06	3.27507e+06	2.84859e+06	3.576e+06	4.92235e+06	4.99683e+06	5.93064e+06	3.74159e+06	3.79505e+06	9.97892e+06	7.58701e+06	7.24621e+06
920	36.6493	337.31	5.0447e+06	1.1607e+07	2.67298e+06	2.84611e+06	3.35088e+06	1.24646e+07	4.91972e+06	8.58676e+06	2.66493e+06	2.82988e+06	2.28994e+06	3.79308e+06	1.50232e+06	1.8615e+06	560662	3.8307e+06	2.29741e+06	1.6819e+06	1.97806e+06	3.52432e+06	4.61112e+06	3.88431e+06	1.69248e+06
921	36.6656	331.264	1.42463e+07	4.88198e+06	1.85952e+06	6.31045e+06	6.61012e+06	4.3033e+07	1.11803e+07	1.46545e+06	3.35948e+06	1.0321e+07	0	1.16266e+06	479710	0	704922	6.55757e+06	363589	3.29283e+06	1.74227e+06	0	5.25267e+06	5.53917e+06	6.11608e+06
922	36.692	423.42	0	4.58751e+06	3.89368e+06	4.10209e+06	3.35656e+06	5.0646e+06	908095	3.04006e+06	3.5515e+06	2.51265e+06	1.94678e+06	0	1.24323e+06	115508	0	2.31103e+06	1.91752e+06	3.53735e+06	820225	345111	3.04972e+06	2.04342e+06	1.01725e+06
923	36.7231	267.232	3.38567e+07	5.52471e+07	9.56557e+06	1.33774e+07	6.87678e+06	1.43234e+07	3.63233e+07	5.65365e+07	1.08607e+07	5.84881e+06	5.33952e+06	1.07222e+07	5.13855e+06	5.61487e+06	4.98637e+06	5.63398e+06	4.90289e+06	6.93416e+06	8.35738e+06	7.16294e+06	2.14023e+07	1.93728e+07	1.93198e+07
924	36.8697	396.392	1.56279e+06	9.11791e+06	2.33098e+06	1.40553e+06	2.57204e+06	0	636965	5.94528e+06	4.92608e+06	2.33149e+06	960565	2.39925e+06	1.03203e+06	161427	290335	3.46672e+06	968558	1.825e+06	1.29053e+06	1.23391e+06	2.72433e+06	2.86361e+06	3.17872e+06
925	37.0819	239.201	0	1.43114e+07	2.36272e+06	1.11551e+06	764695	3.08084e+06	210904	1.71669e+07	433715	618299	837965	623713	1.9749e+06	2.8598e+06	2.60256e+06	684913	1.64152e+06	2.35994e+06	0	636574	3.28426e+06	4.04134e+06	3.70286e+06
926	37.1632	115.075	0	0	0	0	0	0	0	0	0	102701	3.54763e+06	7.0466e+06	3.10736e+06	6.12916e+06	3.5792e+06	6.03482e+06	5.44375e+06	5.44187e+06	5.60161e+06	3.24958e+06	0	524049	643662
927	37.2055	282.252	1.2875e+08	8.69697e+07	3.83637e+07	6.36134e+07	4.22864e+07	1.80374e+08	1.32918e+08	1.2585e+08	5.65486e+07	4.64319e+07	1.73411e+07	4.2714e+07	2.33798e+07	1.78671e+07	1.5664e+07	4.21446e+07	2.14911e+07	2.47347e+07	2.98525e+07	2.37642e+07	7.14779e+07	7.42476e+07	6.82913e+07
928	37.2652	136.016	4.65133e+06	5.21654e+06	1.61719e+07	5.40776e+06	1.01043e+07	3.26092e+06	2.77908e+06	2.62105e+06	9.5966e+06	8.62333e+06	8.84703e+06	9.99329e+06	1.31618e+07	2.71476e+07	1.29507e+07	9.09618e+06	2.09776e+07	1.18217e+07	1.50493e+07	1.51435e+07	6.85495e+06	1.19347e+07	1.16002e+07
929	37.3146	285.27	1.09151e+07	1.42307e+07	8.30605e+06	2.31468e+07	7.84151e+06	1.09864e+07	1.60524e+07	3.07615e+06	7.15955e+06	3.44705e+06	4.51456e+06	7.80662e+06	2.99188e+06	3.24288e+06	4.08e+06	1.06583e+07	6.08141e+06	6.74876e+06	6.68154e+06	3.50614e+06	9.76788e+06	1.12746e+07	6.2579e+06
930	37.3362	283.264	9.29327e+08	1.13234e+09	7.64972e+08	1.21773e+09	4.58424e+08	9.32407e+08	9.3262e+08	5.31581e+08	4.80564e+08	4.25475e+08	2.96312e+08	4.67866e+08	2.58632e+08	1.66491e+08	2.62242e+08	6.37282e+08	3.24751e+08	3.82692e+08	3.97822e+08	2.04392e+08	6.50627e+08	6.85097e+08	6.38752e+08
931	37.3362	284.267	1.80064e+08	2.23501e+08	1.43826e+08	2.35529e+08	8.9e+07	1.78441e+08	1.75023e+08	9.82867e+07	9.00346e+07	8.13794e+07	5.72599e+07	8.83237e+07	4.91604e+07	2.99366e+07	5.02764e+07	1.20393e+08	6.3184e+07	7.31623e+07	7.59055e+07	3.81559e+07	1.21702e+08	1.32779e+08	1.20742e+08
932	37.3362	339.326	3.68366e+07	3.48715e+07	4.79467e+07	5.36357e+07	3.62603e+07	3.21065e+07	3.84672e+07	4.60482e+07	3.83071e+07	2.69885e+07	8.13318e+07	7.11497e+07	7.01902e+07	7.29689e+07	1.16919e+08	1.01063e+08	6.62463e+07	8.6634e+07	8.61085e+07	5.08122e+07	4.71685e+07	5.41493e+07	5.23209e+07
933	37.3387	256.236	1.78126e+08	2.96735e+08	1.54929e+08	2.60092e+08	7.90861e+07	1.97663e+08	1.62178e+08	1.62735e+08	8.79745e+07	7.44714e+07	6.72286e+07	7.62273e+07	5.70038e+07	4.47688e+07	6.29029e+07	7.3698e+07	7.00064e+07	8.20787e+07	7.41422e+07	5.18206e+07	1.3844e+08	1.44026e+08	1.39694e+08
934	37.3387	381.373	7.7418e+06	1.89008e+07	1.13167e+07	1.23592e+07	9.39959e+06	6.51276e+06	7.35121e+06	1.34879e+07	1.15377e+07	4.90287e+06	6.40423e+06	6.33924e+06	4.07356e+06	1.31424e+06	2.81582e+06	8.22911e+06	5.63671e+06	7.33087e+06	6.1308e+06	3.37427e+06	9.01518e+06	8.3187e+06	9.78882e+06
935	37.3466	163.039	1.04927e+07	5.48874e+06	8.02491e+06	8.01989e+06	8.74388e+06	1.0802e+07	5.49767e+06	2.24333e+06	3.52468e+06	8.368e+06	441579	2.70567e+06	1.52343e+06	756415	1.87741e+06	2.48003e+06	1.93321e+06	740447	1.37435e+06	2.20851e+06	7.0578e+06	6.40914e+06	4.02832e+06
936	37.3466	242.22	1.03633e+06	2.00049e+07	2.22546e+06	3.33173e+06	751123	2.02867e+06	389200	9.27864e+06	750734	631755	1.34898e+06	1.31346e+06	1.17978e+06	1.10551e+06	1.12832e+06	914516	1.55035e+06	1.52997e+06	563145	2.43292e+06	3.30199e+06	4.27103e+06	4.72178e+06
937	37.3466	354.346	2.42083e+06	1.56015e+06	4.51117e+06	5.04857e+06	3.28439e+06	2.86878e+06	451307	1.38547e+06	1.99479e+06	1.2275e+06	2.90635e+06	2.59427e+06	3.1686e+06	2.06737e+06	2.84868e+06	3.94921e+06	2.83925e+06	4.24355e+06	3.50922e+06	2.62163e+06	1.76539e+06	3.21094e+06	2.73e+06
938	37.3466	395.389	9.59378e+06	3.25994e+07	8.01625e+06	1.06882e+07	1.01699e+07	8.11696e+06	7.36801e+06	1.85166e+07	1.5585e+07	8.26287e+06	5.06229e+06	1.15325e+07	4.81084e+06	1.32365e+06	868502	1.18075e+07	4.91283e+06	7.7498e+06	5.59028e+06	4.08664e+06	9.94743e+06	1.17251e+07	1.14443e+07
939	37.3546	326.314	0	1.00348e+06	212253	936991	1.12996e+06	0	243845	576187	0	289845	4.483e+06	4.50661e+06	4.23361e+06	2.44088e+06	4.42655e+06	4.55085e+06	3.19957e+06	4.64569e+06	3.14536e+06	3.53355e+06	1.06102e+06	2.03575e+06	1.18752e+06
940	37.3884	304.236	1.45994e+07	3.78431e+06	0	6.99574e+06	3.85024e+06	7.62675e+07	2.02528e+07	2.38771e+06	9.18927e+06	1.55025e+07	238115	4.44225e+06	1.10097e+06	124920	1.5884e+06	4.27718e+06	1.17417e+06	3.30748e+06	2.23457e+06	0	7.98178e+06	6.00406e+06	5.02414e+06
941	37.3956	270.252	1.05589e+07	2.27671e+07	5.96117e+06	8.26036e+06	4.7842e+06	3.04757e+06	1.16344e+07	1.46668e+07	5.11476e+06	5.44878e+06	4.88055e+06	9.26931e+06	3.07379e+06	1.42895e+06	4.34672e+06	5.04053e+06	5.94166e+06	8.23325e+06	4.14397e+06	3.49998e+06	3.38829e+06	8.95679e+06	9.48844e+06
942	37.3956	280.235	8.03866e+07	3.77683e+07	2.69534e+07	3.39451e+07	1.53147e+07	9.63285e+07	9.22046e+07	6.36676e+07	2.17752e+07	1.65749e+07	8.49509e+06	1.10404e+07	8.19001e+06	4.67196e+06	7.58094e+06	2.38246e+07	9.05343e+06	1.04113e+07	1.77324e+07	4.0503e+06	3.6773e+07	3.88699e+07	3.88673e+07
943	37.4237	368.361	1.00942e+07	1.36109e+07	9.04053e+06	1.03259e+07	9.06746e+06	8.06415e+06	9.38385e+06	1.31309e+07	8.91092e+06	7.10807e+06	6.89615e+06	9.17174e+06	5.46181e+06	2.86331e+06	1.5606e+06	1.25729e+07	5.06731e+06	7.91495e+06	7.73316e+06	5.19603e+06	9.26975e+06	8.65151e+06	8.84389e+06
944	37.4406	122.032	4.11033e+06	9.231e+06	3.23517e+07	1.60699e+07	1.72637e+07	7.76681e+06	1.01905e+07	1.07785e+07	1.55038e+07	1.16423e+07	425612	1.57197e+06	1.06816e+06	734243	627949	1.206e+06	775625	880450	2.07853e+06	1.67867e+06	1.08546e+07	1.03371e+07	9.10738e+06
945	37.4406	199.17	0	1.06368e+07	3.18624e+06	1.84199e+06	471000	1.21727e+06	224214	6.39884e+06	1.02895e+06	1.36988e+06	6.87728e+06	5.71565e+06	9.73514e+06	1.98108e+07	6.50032e+06	1.40202e+06	1.09921e+07	6.20237e+06	1.21894e+07	1.06779e+07	5.15642e+06	5.49104e+06	4.81807e+06
946	37.4406	311.295	3.30663e+07	3.26866e+07	2.8455e+07	3.53802e+07	2.34489e+07	2.77525e+07	3.13304e+07	3.83765e+07	2.58075e+07	1.48937e+07	8.10848e+07	1.03905e+08	7.78783e+07	8.41774e+07	9.40743e+07	1.15299e+08	7.3776e+07	1.10957e+08	9.97731e+07	5.97063e+07	4.80146e+07	5.08347e+07	4.93163e+07
947	37.4621	165.055	2.86549e+08	6.40598e+07	1.88802e+08	8.18983e+07	3.57611e+07	1.87984e+08	1.19149e+08	7.18181e+07	5.21636e+07	3.4373e+07	8.48935e+06	8.75872e+06	1.24041e+07	7.49293e+06	1.19297e+07	9.6646e+06	8.05261e+06	9.35452e+06	1.03411e+07	8.94945e+06	7.99059e+07	7.98006e+07	7.39165e+07
948	37.4646	312.298	7.07355e+06	4.99278e+06	6.08712e+06	5.39192e+06	3.53674e+06	5.71851e+06	5.75833e+06	3.6353e+06	4.49144e+06	2.4241e+06	1.70733e+07	2.01637e+07	1.57401e+07	1.45177e+07	1.95643e+07	2.46557e+07	1.43895e+07	2.38288e+07	2.35511e+07	1.25112e+07	9.41078e+06	9.34719e+06	9.91431e+06
949	37.4887	187.097	0	0	0	111889	0	0	0	0	0	0	1.25284e+07	1.4588e+07	1.50654e+07	1.48407e+07	1.36575e+07	1.63127e+07	1.44897e+07	6.69041e+06	2.29013e+07	1.52913e+07	1.54496e+06	4.45556e+06	1.60066e+06
950	37.5245	340.329	9.00458e+06	8.58798e+06	9.98578e+06	1.23568e+07	8.24372e+06	7.9457e+06	8.50712e+06	1.0737e+07	9.71278e+06	823908	1.92651e+07	1.78589e+07	1.64723e+07	1.69185e+07	1.69498e+07	2.2362e+07	2.42505e+07	1.9268e+07	2.08516e+07	1.24956e+07	1.18502e+07	1.25408e+07	1.08887e+07
951	37.5742	254.22	1.66766e+07	3.80103e+07	7.15949e+06	2.20716e+07	3.95128e+06	1.15153e+07	3.05207e+07	6.66114e+07	9.25608e+06	1.47958e+06	3.249e+06	7.5081e+06	1.50617e+06	1.38053e+06	1.51717e+06	2.08184e+06	2.16773e+06	2.43354e+06	3.0964e+06	5.13582e+06	1.57942e+07	1.67481e+07	1.80357e+07
952	37.6902	152.042	1.13019e+06	720396	4.27077e+06	933725	2.44512e+06	479179	1.77625e+06	248291	1.01329e+06	1.82934e+06	2.9785e+06	3.40255e+06	3.97997e+06	7.66094e+06	3.34331e+06	3.16345e+06	7.81623e+06	3.5283e+06	4.34362e+06	5.24585e+06	2.76553e+06	3.14169e+06	2.74522e+06
953	37.6902	507.298	1.59648e+06	1.1096e+07	5.84382e+06	700183	1.11987e+06	4.26158e+06	634782	1.88056e+06	5.67517e+06	0	0	0	0	0	0	0	0	0	0	0	1.79572e+06	2.16236e+06	918108
954	37.7123	166.058	2.71377e+07	4.72327e+06	1.69263e+07	6.70705e+06	1.4481e+06	1.79761e+07	1.12273e+07	5.78109e+06	4.87344e+06	1.16122e+06	0	0	0	0	655130	259939	0	0	0	0	5.12378e+06	3.36363e+06	5.9173e+06
955	38.0714	229.108	597818	0	0	0	0	0	193851	0	0	33218.8	5.92135e+06	6.65938e+06	4.14565e+06	3.18059e+06	5.73634e+06	7.11012e+06	3.40429e+06	5.81806e+06	5.95073e+06	4.83549e+06	830326	113620	247484
956	38.2235	170.089	0	0	0	0	0	0	0	0	0	0	6.38244e+06	5.37387e+06	6.86803e+06	1.42727e+07	1.37497e+07	6.07265e+06	5.69289e+06	7.78456e+06	2.78836e+06	2.3683e+06	1.52071e+06	1.47573e+06	819202
957	38.2296	247.118	0	0	6.75188e+06	0	0	1.64369e+06	64497	0	0	363415	1.29336e+07	1.9109e+07	1.23248e+07	1.09783e+07	1.22559e+07	1.66328e+07	1.05608e+07	1.65888e+07	2.13676e+07	9.89343e+06	4.85143e+06	4.87454e+06	3.86836e+06
958	38.3404	169.086	1.13089e+06	565628	860522	1.10318e+06	2.52918e+06	2.4669e+06	1.62975e+06	1.68306e+06	966384	1.12616e+06	7.85786e+07	8.51013e+07	7.3373e+07	1.54908e+08	1.55211e+08	6.50533e+07	7.45648e+07	8.65938e+07	7.06742e+07	3.80385e+07	3.26847e+07	3.28495e+07	3.44018e+07
959	38.4093	329.067	1.82378e+06	4.34241e+06	1.0437e+07	5.32041e+06	5.34947e+06	3.38362e+06	2.01591e+06	236198	4.1284e+06	4.29249e+06	0	0	338873	386247	0	387040	340758	205780	0	159779	2.11633e+06	2.6798e+06	1.90916e+06
960	38.4521	431.134	1.2163e+06	558795	0	3.8274e+06	1.02376e+06	740310	1.35704e+06	335933	1.44025e+06	916875	0	0	0	0	0	0	0	0	0	0	344359	225738	0
961	38.9586	216.98	1.71981e+06	2.414e+07	7.74396e+06	2.82684e+06	7.6252e+06	8.80685e+06	534786	2.75327e+07	2.98777e+06	2.73306e+06	121305	531731	698486	224963	1.3934e+06	0	536495	0	0	1.22754e+06	6.78252e+06	6.64175e+06	6.93001e+06
962	38.9674	110.974	5.69152e+07	1.56374e+08	1.65864e+08	1.34784e+08	1.20182e+08	6.32167e+07	1.27341e+08	4.53798e+07	3.36714e+08	5.36498e+08	1.83199e+08	1.16066e+07	1.01872e+07	2.7958e+07	1.53681e+08	1.04846e+08	1.82804e+08	1.39673e+08	9.12349e+06	1.84094e+07	1.31958e+08	1.96113e+08	1.95967e+08
963	39.0996	183.065	530314	0	0	0	0	0	118427	0	0	0	6.87683e+06	9.73629e+06	4.64111e+06	2.10518e+06	4.98172e+06	5.60336e+06	5.78908e+06	6.73512e+06	4.80554e+06	5.84674e+06	511083	1.66126e+06	1.20494e+06
964	39.1051	261.134	3.73459e+06	487577	0	1.08718e+06	0	1.18752e+06	2.12608e+06	315475	0	227709	2.58679e+06	2.91568e+06	3.03561e+06	2.51816e+06	3.31754e+06	2.55812e+06	1.8054e+06	4.03499e+06	3.84581e+06	1.52629e+06	493810	806596	0
965	39.1719	301.107	2.94608e+06	0	2.01861e+06	7.8187e+06	3.43829e+06	0	2.6227e+06	1.7282e+06	547563	860626	2.93658e+06	2.02004e+06	3.56841e+06	3.57805e+06	1.60563e+06	1.00737e+06	4.71917e+06	2.54483e+06	4.457e+06	4.77271e+06	3.59394e+06	3.36009e+06	2.94891e+06
966	39.206	97.0283	1.49548e+06	4.61326e+06	4.43291e+06	3.66271e+06	4.69995e+06	2.67712e+06	3.45147e+06	949735	7.40818e+06	4.4306e+06	3.3539e+06	3.86734e+06	2.67947e+06	2.2104e+06	3.51941e+06	3.79795e+06	2.03609e+06	3.82045e+06	1.15425e+06	2.59344e+06	2.74192e+06	4.57686e+06	2.41563e+06
967	39.331	220	2.29214e+07	7.07795e+07	6.33813e+07	2.06766e+07	4.656e+07	9.9678e+06	1.77801e+07	9.0948e+07	1.99751e+07	2.0633e+07	0	608330	0	0	180331	0	565124	0	0	0	3.28251e+07	2.47493e+07	2.32925e+07
968	39.3944	195.065	6.36379e+07	1.19117e+07	3.38768e+07	1.6286e+07	1.96809e+07	3.24466e+07	2.09037e+07	2.53535e+07	1.50701e+07	1.5387e+07	1.83892e+07	1.81023e+07	1.72257e+07	2.03735e+07	2.0442e+07	1.44078e+07	1.78595e+07	1.87208e+07	2.00699e+07	1.76101e+07	2.24903e+07	2.43267e+07	1.99989e+07
969	39.4614	123.044	2.20619e+06	1.63118e+06	2.89317e+06	999028	1.62759e+06	843968	790388	2.59846e+06	475492	751406	3.2626e+06	3.30879e+06	2.43108e+06	5.43452e+06	8.10628e+06	3.37413e+06	839221	3.22339e+06	6.9502e+06	862490	1.80014e+06	1.77959e+06	1.99804e+06
970	39.8579	417.155	4.29757e+06	1.34263e+06	244322	318210	75381.1	2.58941e+06	475166	2.03955e+06	140265	249241	3.9445e+06	1.99783e+06	5.83352e+06	5.91056e+06	3.53172e+06	4.77082e+06	6.4184e+06	2.51923e+06	7.168e+06	3.35596e+06	1.92193e+06	2.49536e+06	1.99278e+06
971	39.9529	377.124	0	514797	2.11032e+06	2.70623e+06	1.98062e+06	0	994145	0	4.35694e+06	2.10516e+06	561572	194626	883092	1.58536e+06	729423	872593	891852	0	973657	1.61605e+06	1.32497e+06	1.35468e+06	768176
972	39.9791	225.076	1.80525e+07	6.17223e+06	1.1716e+07	1.17128e+07	9.94076e+06	7.18054e+06	6.59359e+06	794736	1.38528e+07	7.32067e+06	8.58425e+06	8.37576e+06	8.49279e+06	9.06366e+06	9.55591e+06	8.36282e+06	7.5871e+06	5.9138e+06	1.05575e+07	1.28857e+07	5.15845e+06	8.71553e+06	6.98377e+06
973	39.9822	166.026	258295	289672	630945	501832	3.12616e+06	479989	486601	350468	508094	1.65142e+06	6.1221e+06	6.13936e+06	8.56399e+06	1.14798e+07	8.9705e+06	3.77804e+06	1.12764e+07	6.58942e+06	6.63966e+06	1.52819e+07	1.26704e+06	2.19776e+06	1.61781e+06
974	39.9822	349.129	3.31553e+06	1.78466e+06	4.31259e+06	9.05621e+06	4.06288e+06	2.41988e+06	4.98775e+06	1.55533e+06	2.21358e+06	2.20494e+06	4.01985e+06	4.33324e+06	5.4474e+06	8.7115e+06	4.04676e+06	4.63457e+06	6.62063e+06	3.44271e+06	6.58119e+06	9.88173e+06	5.18162e+06	4.94295e+06	5.0048e+06
975	40.0783	131.034	2.14796e+06	1.83396e+06	8.42938e+06	2.05618e+06	2.32712e+06	4.12429e+06	201841	3.44286e+06	6.05629e+06	3.92932e+06	2.76159e+06	3.45824e+06	3.37014e+06	1.64773e+06	1.73306e+06	3.36102e+06	2.33752e+06	3.50985e+06	3.51749e+06	941885	2.27413e+06	1.95859e+06	3.49468e+06
976	40.3775	273.134	0	0	0	0	0	0	0	0	0	0	4.96286e+06	3.75371e+06	3.64839e+06	2.56968e+06	3.80355e+06	5.07442e+06	1.4948e+06	3.32184e+06	2.4323e+06	4.29773e+06	664089	376447	605387
977	40.6106	189.989	9.46652e+06	7.22193e+07	4.85205e+07	1.16501e+07	1.78598e+07	1.74202e+07	9.45388e+06	3.41602e+07	4.60308e+07	1.26817e+07	246991	0	0	0	0	283234	0	1.01221e+06	0	7.44399e+06	2.17665e+07	1.63571e+07	1.66153e+07
978	40.6949	243.123	0	0	0	0	0	0	0	0	0	0	3.14221e+06	3.49906e+06	2.00041e+06	716438	2.15114e+06	2.31598e+06	797542	2.70862e+06	1.81967e+06	1.91889e+06	194994	300573	113565
979	40.806	203.973	8.25973e+06	4.515e+07	2.69097e+07	6.45586e+06	2.21512e+07	1.60861e+07	3.81794e+06	6.84616e+07	6.75282e+06	1.12253e+07	0	72710.3	0	56098.9	0	0	0	0	0	184965	1.51322e+07	1.43382e+07	1.41036e+07
980	40.8156	307.085	0	0	0	0	0	0	0	0	0	0	8.03476e+06	1.30942e+07	5.4272e+06	2.2356e+06	1.95402e+06	5.83024e+06	3.51406e+06	7.76983e+06	1.13217e+07	3.74293e+06	1.28376e+06	1.88796e+06	1.13183e+06
981	40.8772	98.0235	352010	0	0	395349	1.13809e+06	242640	434445	378787	193289	673117	2.10632e+06	3.39727e+06	878594	927881	6.00761e+06	1.91375e+06	3.77927e+06	1.92962e+06	6.49407e+06	4.25392e+06	1.56359e+06	1.48244e+06	1.21228e+06
982	40.8954	221.011	1.54051e+08	1.38322e+08	2.52489e+09	5.00702e+08	1.13119e+09	3.21128e+09	6.81972e+08	3.28402e+09	1.11786e+09	1.02859e+09	2.25333e+09	3.13328e+09	2.46601e+09	7.52175e+08	2.64203e+08	2.80148e+09	2.45694e+09	2.87684e+09	2.74543e+09	6.19722e+08	1.45722e+09	1.34993e+09	2.68819e+09
983	40.8954	223.009	6.25594e+06	5.60963e+06	7.18243e+07	1.16828e+07	3.5834e+07	9.02655e+07	2.0972e+07	9.7043e+07	1.77407e+07	3.20738e+07	7.60776e+07	1.05134e+08	7.89312e+07	2.21895e+07	9.14993e+06	8.9888e+07	7.28677e+07	9.42306e+07	8.87319e+07	1.88109e+07	7.8771e+07	7.57644e+07	7.75852e+07
984	40.8987	222.015	5.79971e+06	8.10892e+06	1.14802e+08	2.35051e+07	5.25322e+07	1.4952e+08	3.33191e+07	1.51972e+08	2.46747e+07	4.638e+07	1.05229e+08	1.50796e+08	1.09187e+08	3.38714e+07	1.66028e+07	1.15787e+08	9.77327e+07	1.332e+08	1.27188e+08	2.79119e+07	1.24875e+08	1.22876e+08	1.23119e+08
985	41.0672	233.102	80687	0	0	0	0	0	0	0	0	836927	3.86126e+06	5.39875e+06	6.57182e+06	3.06686e+06	4.68543e+06	5.84653e+06	2.69466e+06	4.30057e+06	4.25627e+06	2.74493e+06	778711	276316	718648
986	41.082	205.049	6.78639e+06	8.3372e+06	1.22612e+07	8.25748e+06	1.06228e+07	5.92937e+06	7.85406e+06	3.73751e+06	8.22679e+06	4.83476e+06	0	342436	653829	321822	235439	708269	1.13199e+06	4.1299e+06	2.59711e+06	3.35513e+06	5.03536e+06	4.5832e+06	5.05887e+06
987	41.1728	190.981	6.34262e+06	5.00865e+07	1.82911e+07	2.76014e+06	1.05261e+07	1.1605e+07	5.08012e+06	2.31126e+07	2.93394e+07	8.52489e+06	0	0	0	0	0	0	0	0	0	5.07543e+06	1.05643e+07	1.11183e+07	1.02445e+07
988	41.5475	148.99	5.93864e+07	672238	1.34637e+07	6.09117e+07	9.406e+06	3.71148e+07	1.07724e+07	4.00056e+07	1.07188e+07	1.57547e+07	3.86657e+07	4.92359e+07	4.13476e+07	1.08109e+07	3.6775e+06	4.40952e+07	3.62702e+07	3.95215e+07	4.31872e+07	9.12334e+06	3.08072e+07	3.02872e+07	2.88556e+07
989	41.7895	220.111	138791	0	8.64813e+06	2.37048e+06	4.45614e+06	1.24165e+07	3.20661e+06	9.30814e+06	6.23392e+06	4.2425e+06	1.70721e+07	8.73742e+06	1.85232e+07	3.92484e+06	1.82094e+06	2.18979e+07	1.26941e+07	1.94636e+07	1.96652e+07	2.53309e+06	1.3625e+07	1.26762e+07	1.31902e+07
990	41.8782	188.273	990886	7.0282e+06	2.94714e+06	851568	1.28418e+06	2.04826e+06	254575	2.27537e+06	4.48261e+06	1.04642e+06	0	0	0	0	0	0	0	0	0	0	2.11984e+06	1.31794e+06	1.58534e+06
991	41.881	249.007	4.62654e+07	1.90746e+08	1.86341e+08	1.69316e+08	1.73582e+08	6.80277e+07	6.96617e+07	1.59717e+08	1.8859e+08	9.21133e+07	3.54385e+06	1.01999e+06	454975	386069	83340.7	3.17361e+06	197986	2.39338e+06	2.61757e+06	3.03926e+06	9.49e+07	8.69987e+07	9.17097e+07
992	41.9136	110.654	0	606199	480867	1.24163e+06	636664	0	549505	0	1.85686e+06	3.15958e+06	1.819e+06	0	97960	0	1.08943e+06	568147	2.10935e+06	1.10851e+06	0	0	903902	542599	633272
993	42.5746	224.011	135751	0	868630	298866	0	858558	91240.2	223526	424981	207866	1.88713e+06	2.4101e+06	2.20123e+06	805688	608806	2.5115e+06	742376	2.91709e+06	1.61012e+06	457109	741671	230371	296628
994	42.9113	347.008	0	3.64629e+06	2.90969e+06	732445	1.64555e+06	0	0	4.17965e+06	7.31569e+06	1.01288e+06	0	0	0	0	0	0	0	0	0	0	1.01255e+06	793091	606465
995	43.1557	305.034	7.48277e+06	7.95526e+06	3.90508e+07	9.72522e+06	7.77433e+06	1.53877e+07	7.61273e+06	2.97415e+07	2.45793e+07	1.4227e+07	0	0	0	0	0	0	0	0	0	0	1.17261e+07	1.07419e+07	1.18135e+07
996	43.6365	227.997	2.09185e+06	228004	6.42325e+06	3.09964e+06	1.41448e+07	1.71258e+07	808497	558582	295070	1.64012e+06	471456	1.45601e+06	3.02467e+06	3.04678e+06	483158	825819	723121	2.17034e+07	2.87211e+07	2.53875e+07	5.15797e+06	4.61081e+06	5.04144e+06
997	43.6849	156.962	3.17788e+07	7.01825e+08	2.3011e+08	2.99259e+07	1.44972e+08	2.20239e+08	1.49404e+07	1.91564e+08	1.08272e+09	1.05388e+08	1.00388e+06	4.8668e+06	5.68677e+06	6.90318e+06	1.36449e+06	1.52309e+06	3.3164e+06	1.6544e+06	4.4925e+06	2.69331e+06	2.59385e+08	2.80701e+08	2.49284e+08
998	43.7982	138.97	2.2254e+06	6.36943e+06	1.6849e+07	1.39464e+07	7.73891e+06	3.73433e+06	3.78135e+06	1.81896e+06	8.41057e+06	2.52252e+06	442751	1.78212e+06	993885	374474	746173	692970	870143	2.35597e+06	748052	1.0115e+06	5.92027e+06	5.3859e+06	5.0417e+06
999	43.8012	441.373	711036	1.91532e+06	1.28964e+06	609981	699551	2.18921e+06	895098	741220	0	1.36198e+06	0	0	0	0	0	0	0	0	0	0	532713	449273	261790
1000	44.0501	130.979	430451	1.09798e+06	3.3606e+06	509856	426968	1.21636e+06	837360	1.7655e+06	1.21572e+06	846536	3.30367e+06	4.69257e+06	2.02307e+06	866101	1.01423e+06	4.17715e+06	2.96582e+06	4.16278e+06	4.6267e+06	761464	1.10274e+06	2.20852e+06	1.4209e+06
1001	44.4962	158.958	2.00976e+06	6.19257e+07	1.88211e+07	2.13172e+06	1.29953e+07	1.76285e+07	924277	1.68515e+07	9.37576e+07	8.76604e+06	361171	0	326398	280074	363547	1.12584e+06	638100	401450	232982	720606	2.18273e+07	2.27427e+07	2.09649e+07
1002	44.6557	114.935	3.40452e+06	2.32712e+06	6.80249e+06	3.61095e+06	4.53345e+06	7.62306e+06	2.58502e+06	2.53451e+06	2.42114e+07	1.05521e+07	0	1.91998e+06	0	0	189133	0	590236	0	0	766695	1.87692e+06	4.67521e+06	1.30885e+06
1003	44.869	157.966	361470	1.24166e+07	3.9321e+06	284278	1.56899e+06	3.46779e+06	99186.9	2.42456e+06	2.07495e+07	1.42134e+06	0	0	0	0	46232.4	0	0	0	0	81338.2	3.95522e+06	3.96533e+06	3.35219e+06
1004	45.3195	139.937	144324	0	0	995407	0	1.38221e+06	109368	143426	0	0	2.0216e+06	1.02645e+06	1.61345e+06	1.19327e+06	1.72023e+06	1.29289e+06	1.22675e+06	1.45285e+06	1.15735e+06	1.63956e+06	142576	0	451651
1005	45.3334	362.145	705037	0	0	0	0	0	0	0	0	0	436543	735021	326454	367808	516443	593593	233715	418981	330625	429100	303694	103824	108310
1006	45.4217	125.928	2.97221e+06	2.24745e+06	2.24809e+06	2.54094e+06	2.81588e+06	2.24569e+06	2.593e+06	2.33225e+06	3.18411e+06	2.25007e+06	2.49821e+06	2.38952e+06	2.17162e+06	4.24958e+06	3.02409e+06	2.85407e+06	2.75419e+06	2.49655e+06	2.56618e+06	2.6683e+06	2.9338e+06	2.67297e+06	2.34229e+06
1007	45.4233	319.23	2.53027e+08	2.93868e+08	1.94314e+08	2.15286e+08	1.10486e+08	2.2768e+08	3.41387e+08	2.18093e+08	2.77931e+08	4.17867e+07	9.37774e+06	120411	0	693379	207770	209553	817256	1.22077e+06	5.14516e+06	4.79195e+06	1.37227e+08	1.12999e+08	1.17273e+08
1008	45.4851	159.886	913355	122319	112251	452295	565848	136378	1.32275e+06	105861	303188	637553	273053	547275	139755	647478	470476	259540	480501	115250	179441	417724	641583	224840	677946
1009	45.5341	321.227	6.06264e+06	5.37008e+06	5.62838e+06	3.82723e+06	2.50993e+06	2.37011e+06	2.93271e+06	4.29666e+06	5.75919e+06	7.1083e+06	0	0	0	0	0	0	0	0	0	0	2.10698e+06	2.47678e+06	2.27795e+06
1010	45.5655	116.933	1.56564e+06	672784	2.59835e+06	1.61136e+06	1.16069e+06	3.84439e+06	734535	797576	1.06005e+07	4.48262e+06	656482	2.92545e+06	504796	574946	921174	1.3388e+06	1.82125e+06	1.55969e+06	2.59208e+06	829484	1.23654e+06	1.83016e+06	959083
1011	45.6542	615.496	6.00172e+06	2.594e+06	1.39431e+06	532775	2.29006e+06	652519	7.17839e+06	3.52828e+06	2.01989e+06	611803	3.53312e+06	901503	0	311241	176323	535380	363235	328340	528432	364575	2.55434e+06	2.40679e+06	2.05711e+06
1012	45.807	137.94	220025	463878	2.21257e+06	5.92061e+06	71696.6	8.67195e+06	59967.2	933151	68819.7	248788	1.03517e+07	9.83301e+06	1.88943e+07	9.12034e+06	1.04828e+07	1.14591e+07	1.02079e+07	1.1013e+07	1.00088e+07	1.55537e+07	1.3203e+06	1.37553e+06	872660
1013	46.1671	415.306	216397	0	0	1.28896e+06	0	2.90504e+06	0	0	0	871976	2.0621e+06	2.88645e+06	2.98319e+06	1.41787e+06	374525	8.30136e+06	3.2878e+06	2.26779e+06	6.1791e+06	2.67686e+06	5.72471e+06	772885	723272
1014	46.1932	250.093	0	0	0	0	0	0	0	0	0	0	431695	417653	171281	544456	1.00084e+06	906327	351324	741776	783025	446661	309794	241644	178443
1015	46.2715	727.62	1.76296e+06	1.10087e+06	488605	245695	293316	267485	475336	475873	130647	0	659630	0	59290.2	59222.4	50956.4	124786	79506.2	101909	0	404004	832194	421721	648291
1016	47.0067	191.055	3.26676e+06	0	0	6.13939e+06	2.26808e+06	1.04207e+07	5.58356e+07	3.57109e+06	3.29945e+06	0	5.32057e+06	3.60074e+06	4.16128e+06	3.76269e+06	9.74754e+06	9.42935e+06	5.51556e+06	3.47253e+06	1.79795e+07	1.88723e+07	3.46255e+06	0	1.19019e+07
1017	47.1237	153.98	63911.6	163868	118792	641859	130743	0	0	0	706533	104438	853855	0	136137	979547	362332	1.26072e+06	162949	1.38633e+06	246936	565083	387638	82653.2	966470
1018	47.2794	306.218	2.98179e+07	3.31516e+07	3.59512e+07	4.36445e+07	1.93205e+07	4.44222e+07	5.03643e+07	3.59339e+07	4.26015e+07	5.05032e+06	273954	0	0	48685.5	0	0	150032	0	0	0	1.82469e+07	2.1515e+07	1.74838e+07
1019	47.2911	124.983	2.35061e+06	1.98067e+06	1.10654e+06	937558	2.2008e+06	526991	2.73773e+06	1.72175e+06	1.80865e+06	3.01975e+06	130927	298782	93123.5	500585	433564	394539	241034	0	203764	149918	1.48059e+06	1.26837e+06	1.61811e+06
1020	47.8506	135.944	2.56206e+07	2.28893e+07	3.02961e+07	3.18746e+07	2.40261e+07	5.28145e+07	1.94593e+07	2.90267e+07	2.43781e+07	2.29827e+07	4.32023e+07	5.07435e+07	6.4213e+07	3.59164e+07	4.23221e+07	4.19511e+07	5.25052e+07	4.75785e+07	3.94294e+07	5.41674e+07	2.57133e+07	2.73251e+07	2.7676e+07
1021	48.0423	244.979	3.66303e+06	5.9491e+06	1.47162e+07	4.85559e+06	2.70411e+06	2.58447e+07	1.68657e+06	1.25752e+07	1.65869e+07	4.8625e+06	0	0	0	0	0	0	0	0	0	0	7.1391e+06	6.30163e+06	6.63067e+06
1022	48.0781	174.01	263397	321016	1.73324e+06	1.14665e+06	136453	2.73945e+06	0	570511	1.98296e+06	245973	1.68999e+06	4.22873e+06	4.29895e+06	3.35738e+06	894115	1.08097e+06	2.00872e+06	1.18889e+06	5.12549e+06	2.95559e+06	828889	627253	696090
1023	48.094	305.215	1.80153e+08	5.44813e+07	2.12355e+08	2.67937e+08	1.14023e+08	2.52331e+08	2.91833e+08	2.40109e+08	2.65231e+08	3.89628e+07	855471	1.14093e+07	3.71672e+06	422995	1.98338e+06	1.0084e+07	6.15356e+06	6.28757e+06	5.3129e+06	818525	1.31764e+08	1.25044e+08	1.21911e+08
1024	48.1534	172.014	8.00614e+06	7.75021e+06	7.07468e+06	6.74652e+06	7.12378e+06	3.80559e+07	4.42695e+06	1.93794e+07	0	0	4.9709e+07	1.15356e+08	1.06149e+08	9.13281e+07	3.5718e+07	2.91375e+07	6.47544e+07	3.9122e+07	1.19405e+08	7.62265e+07	1.9063e+07	1.73878e+07	1.7836e+07
1025	48.1649	173.007	4.36471e+06	3.82376e+06	3.78685e+06	5.54496e+06	4.96502e+06	2.05299e+07	3.12009e+06	9.65717e+06	2.41118e+06	0	2.69451e+07	6.76758e+07	5.84634e+07	4.92449e+07	1.90775e+07	1.63641e+07	3.59916e+07	8.99886e+06	7.03848e+07	4.15748e+07	9.9254e+06	9.59578e+06	8.21541e+06
1026	48.1699	291.199	8.20394e+07	8.74576e+07	1.12537e+08	1.60193e+08	5.76666e+07	1.73639e+08	1.05989e+08	1.21554e+08	1.30433e+08	1.53494e+07	1.1311e+06	700624	578324	1.08947e+06	1.56426e+06	994942	3.1209e+06	1.82955e+06	1.03234e+06	785918	6.81686e+07	6.77531e+07	6.39211e+07
1027	48.2362	320.234	4.50775e+07	5.28766e+07	3.07699e+07	3.92509e+07	1.80673e+07	3.34051e+07	6.06566e+07	3.35234e+07	4.74594e+07	6.18633e+06	2.11708e+06	0	0	0	224828	296037	120377	71152.1	0	0	2.00151e+07	1.8829e+06	1.85164e+07
1028	48.5165	239.023	1.44083e+06	8.10782e+06	1.14401e+07	3.41788e+06	2.37635e+06	5.03334e+06	786342	6.04275e+06	1.62065e+07	3.52916e+06	1.65314e+06	538870	899706	844573	694974	785644	2.68003e+06	1.22602e+06	342120	288978	1.30424e+06	5.46701e+06	5.64555e+06
1029	48.5466	185.008	2.45577e+06	702055	1.98152e+06	3.89103e+06	1.28141e+06	1.03094e+06	794062	624529	1.48544e+06	1.41405e+06	3.83871e+06	5.8451e+06	6.71276e+06	2.65887e+06	3.29215e+06	3.84876e+06	3.28552e+06	4.32476e+06	3.49349e+06	6.74423e+06	1.69254e+06	1.5402e+06	1.87693e+06
1030	48.7652	188.038	0	169710	0	0	56378.5	190861	0	0	1.06459e+06	0	1.52793e+07	6.38725e+06	4.49204e+06	1.94377e+06	6.3593e+06	2.77766e+07	5.60996e+06	4.69047e+07	8.72726e+06	9.01487e+06	1.83377e+06	2.47542e+06	2.59028e+06
1031	48.7652	210.076	0	0	0	0	0	0	0	0	0	0	1.94801e+06	2.5694e+06	2.68089e+06	431754	946420	2.92525e+06	1.32923e+06	2.13199e+06	3.89871e+06	2.55474e+06	354402	252963	110699
1032	48.8767	127.002	369904	544653	1.12786e+06	1.3776e+06	610922	2.68211e+06	0	560295	299965	143831	8.66284e+06	1.09515e+07	1.13343e+07	5.92663e+06	5.99842e+06	7.26118e+06	6.49289e+06	8.67667e+06	8.88967e+06	9.92976e+06	1.69794e+06	1.3823e+06	1.13138e+06
1033	48.9894	94.0367	2.85541e+06	417820	4.76659e+06	3.33653e+06	1.07587e+06	1.92545e+06	398477	3.88639e+06	2.67169e+06	1.43053e+06	1.76566e+06	3.028e+06	2.87116e+06	1.55289e+06	3.25654e+06	2.436e+06	1.91055e+06	3.57723e+06	3.10283e+06	3.52245e+06	2.34502e+06	1.8266e+06	1.88116e+06
1034	49.0214	80.964	4.23445e+06	1.47889e+07	1.18563e+07	6.34997e+06	4.68846e+06	6.23038e+06	3.84414e+06	8.50985e+06	9.21394e+06	5.21088e+06	2.37018e+06	2.7798e+06	3.17794e+06	3.40422e+06	198151	1.89004e+06	2.95245e+06	1.92663e+06	3.56459e+06	2.64788e+06	5.40402e+06	6.38358e+06	5.67172e+06
1035	49.0214	117.007	2.38732e+06	480157	963851	2.01467e+06	555664	3.22768e+06	2.33922e+06	6.34354e+06	1.7349e+06	938335	4.12315e+06	2.90997e+06	3.80923e+06	1.73107e+06	3.5381e+06	4.43038e+06	1.01954e+06	4.98021e+06	4.06638e+06	2.75098e+06	2.18505e+06	2.394e+06	3.0115e+06
1036	49.0214	165.989	836615	1.29388e+06	670668	1.12951e+06	483126	5.06794e+06	172324	2.70905e+06	1.92646e+06	963727	3.67153e+06	5.39489e+06	4.88167e+06	5.81818e+06	2.94231e+06	1.27628e+07	4.53017e+06	3.68975e+06	4.8083e+06	4.41743e+06	1.58058e+06	1.54479e+06	1.19638e+06
1037	49.0674	192.077	4.69528e+06	5.19363e+06	6.03262e+06	2.6134e+07	8.20533e+06	479726	6.8615e+06	196273	4.63097e+06	6.51664e+06	0	0	0	367421	1.44795e+06	1.17068e+06	941317	285472	1.77432e+06	944420	4.0784e+06	3.8465e+06	4.37571e+06
1038	49.0789	321.027	1.25061e+07	2.52581e+07	1.07287e+08	2.914e+07	3.11358e+07	4.68281e+07	2.65772e+07	8.60096e+06	5.50961e+07	4.86985e+07	65289.9	88125.6	212714	130521	178343	0	61978.4	0	88114.3	175092	2.83381e+07	2.89175e+07	2.97061e+07
1039	49.1415	322.032	158974	1.24434e+06	1.32676e+07	1.88913e+06	2.61066e+06	5.56557e+06	1.31144e+06	93278.5	6.41346e+06	5.00106e+06	0	0	0	0	39219.4	0	0	0	0	0	1.17432e+06	2.24219e+06	2.22301e+06
1040	49.3409	150.019	2.88569e+07	3.58955e+06	7.55458e+06	1.07847e+07	4.89649e+06	1.05507e+06	2.81792e+06	1.16267e+06	3.6347e+06	4.5172e+06	1.285e+07	6.73408e+06	1.55462e+07	1.42995e+07	1.98381e+07	6.61839e+06	1.5387e+07	8.74896e+06	6.53986e+06	1.61077e+07	3.29669e+06	2.4718e+06	4.24834e+06
1041	49.349	164.985	2.03049e+07	4.18185e+07	4.97085e+07	2.77377e+07	2.4308e+07	1.17101e+08	1.1073e+07	7.22754e+07	6.10848e+07	3.23558e+07	9.20237e+07	1.3932e+08	1.17685e+08	1.46695e+08	7.03825e+07	5.79363e+07	1.21783e+08	8.9975e+07	1.29812e+08	9.93821e+07	5.17385e+07	4.93798e+07	5.22719e+07
1042	49.4339	265.038	2.39141e+06	434426	1.16966e+06	4.97465e+07	870690	1.89609e+07	4.36195e+06	269823	1.11989e+06	288457	48454.1	0	0	0	0	228842	0	0	0	0	4.24545e+06	3.79932e+06	3.3944e+06
1043	49.4487	381.05	4.22531e+06	2.64723e+06	8.4148e+06	8.64578e+06	4.45448e+06	1.37697e+06	3.65961e+06	351672	2.05814e+06	1.58425e+06	0	0	0	0	0	0	0	0	0	0	1.88449e+06	2.822e+06	2.85824e+06
1044	49.6604	133.991	1.84428e+06	1.9236e+06	2.94887e+06	5.51035e+06	1.04892e+06	1.04651e+07	795832	4.58199e+06	972872	1.17711e+06	7.33638e+06	7.34239e+06	1.20474e+07	7.90146e+06	9.70542e+06	1.10914e+07	6.6829e+06	6.39978e+06	8.09701e+06	1.08521e+07	2.65109e+06	3.29886e+06	3.54187e+06
1045	49.7619	168.029	1.11606e+07	2.72751e+06	8.79234e+06	1.44356e+06	1.31101e+06	4.71071e+06	1.14642e+06	1.39026e+07	1.71528e+06	2.14033e+06	2.70171e+06	2.32994e+06	2.81781e+06	1.36738e+06	2.53063e+06	2.15856e+06	3.14599e+06	2.34595e+06	4.08434e+06	4.44453e+06	3.91518e+06	5.28345e+06	3.79089e+06
1046	49.775	517.101	372673	1.42956e+06	4.47335e+06	1.03168e+06	1.63759e+06	1.1905e+06	204736	0	2.5756e+06	1.8263e+06	0	0	0	0	0	0	0	0	0	0	795410	948976	922154
1047	49.8169	93.0334	5.50067e+07	2.07532e+07	1.00161e+08	6.97733e+07	3.06634e+07	4.76225e+07	3.46682e+07	7.50351e+07	4.8346e+07	4.35368e+07	3.17072e+07	4.63632e+07	3.39572e+07	2.16781e+07	7.38053e+07	2.35483e+07	4.37827e+07	7.06465e+07	7.37824e+07	6.3568e+07	4.5903e+07	4.39298e+07	4.23116e+07
1048	49.8169	107.049	2.94599e+06	452302	303150	0	738518	1.56535e+07	2.27135e+06	3.07048e+06	626981	151113	1.90097e+06	3.15446e+06	3.17103e+06	3.43694e+06	1.85291e+06	1.43261e+06	3.04272e+06	2.47878e+06	3.88444e+06	3.34695e+06	1.37579e+06	2.03903e+06	1.90272e+06
1049	49.829	137.023	3.35347e+08	1.22957e+08	6.42256e+08	4.91493e+08	1.96601e+08	2.94244e+08	2.20971e+08	4.83538e+08	3.03754e+08	2.81904e+08	2.13707e+08	3.39177e+08	2.17408e+08	1.48715e+08	4.70864e+08	1.78158e+08	2.82868e+08	4.65589e+08	5.27032e+08	4.14691e+08	2.84788e+08	2.80361e+08	2.84093e+08
1050	49.8407	292.021	623980	6.5238e+06	3.67758e+07	9.89235e+06	1.20646e+07	1.23262e+07	1.00508e+07	0	9.31249e+06	1.17725e+07	0	0	0	0	0	0	0	0	0	0	7.44027e+06	4.84215e+06	5.89933e+06
1051	49.8444	294.037	1.02737e+07	4.46863e+06	7.36443e+06	2.35533e+07	7.55522e+06	3.64391e+06	1.32264e+07	1.12937e+06	2.39291e+06	2.03187e+06	0	0	0	0	0	0	0	0	64974.6	0	4.39221e+06	3.30765e+06	3.49918e+06
1052	49.8687	324.047	8.23357e+06	1.78374e+06	9.74667e+06	1.58778e+07	4.36266e+06	8.92163e+06	6.29937e+06	1.79838e+06	3.09302e+06	3.25004e+06	0	0	0	0	0	0	0	0	0	0	3.90171e+06	4.05442e+06	4.11091e+06
1053	49.8846	152.985	2.09105e+07	5.15244e+07	1.77811e+08	6.96574e+07	5.27878e+07	7.03741e+07	3.04126e+07	2.44494e+07	9.95539e+07	4.08165e+07	3.66806e+06	2.76808e+06	2.79023e+06	4.73041e+06	5.69188e+06	1.94007e+06	3.21716e+06	2.18223e+06	1.22909e+06	3.17411e+06	4.96886e+07	4.89143e+07	5.31174e+07
1054	49.8846	228.204	888760	1.71018e+07	2.51864e+06	4.37184e+06	211106	2.87813e+06	997478	1.66906e+07	511069	197085	1.65727e+06	4.28575e+06	6.25164e+06	7.86588e+06	4.22326e+06	2.78396e+06	6.30102e+06	4.47961e+06	5.49059e+06	9.11288e+06	4.4508e+06	4.85959e+06	4.83167e+06
1055	49.8857	71.0126	0	254924	0	217809	297154	764072	111229	219965	340776	96522.8	9.08131e+06	1.10182e+07	7.93544e+06	5.00951e+06	7.16973e+06	9.67961e+06	5.37564e+06	1.08037e+07	1.02225e+07	6.43068e+06	2.49643e+06	2.36571e+06	2.80293e+06
1056	49.8857	239.201	720410	7.29613e+06	1.50806e+06	2.75299e+06	138579	3.29246e+06	0	1.17672e+07	0	0	4.80315e+06	2.00927e+06	6.19122e+06	6.54758e+06	5.53537e+06	3.66349e+06	6.08145e+06	4.40242e+06	4.25413e+06	5.99192e+06	2.80925e+06	2.93767e+06	2.74106e+06
1057	49.8865	282.252	4.16002e+07	2.45777e+07	1.21235e+07	2.88072e+07	8.06238e+06	1.10263e+08	3.76454e+07	4.99177e+07	1.38317e+07	1.00716e+07	1.70098e+07	3.536e+07	3.23281e+07	1.58621e+07	1.46021e+07	3.8707e+07	2.51225e+07	2.96871e+07	2.6772e+07	2.94175e+07	2.98909e+07	2.63072e+07	2.81181e+07
1058	49.8967	203.996	7.66492e+07	1.42832e+07	9.84153e+07	1.88463e+06	3.00859e+06	7.32311e+06	1.6996e+07	1.85594e+07	6.62013e+07	4.50668e+07	225045	0	0	0	167048	360100	0	0	199487	0	3.06993e+07	3.03256e+07	3.00364e+07
1059	49.8967	291.018	2.41314e+07	7.98257e+07	3.47452e+08	9.8426e+07	1.12969e+08	1.48902e+08	9.52366e+07	1.84383e+07	1.10003e+08	1.15363e+08	605824	320424	70928.2	76441.8	311086	192289	0	128541	0	90087.3	9.20634e+07	8.49286e+07	8.81285e+07
1060	49.8967	323.044	8.28318e+07	3.02148e+07	7.96372e+07	1.46201e+08	3.86787e+07	8.44286e+07	7.67712e+07	3.09668e+07	3.64219e+07	3.15303e+07	0	147231	271692	66786.8	613423	136678	197771	0	0	721448	4.04896e+07	3.84384e+07	3.91647e+07
1061	49.9707	293.034	1.11504e+08	4.53774e+07	9.69802e+07	2.26701e+08	7.80689e+07	7.77639e+07	1.25845e+08	2.98428e+07	3.75433e+07	2.76784e+07	460649	0	854475	490556	117979	236943	355891	0	665631	168305	5.35526e+07	4.9766e+07	5.19248e+07
1062	49.9707	309.028	1.68043e+06	2.37185e+06	2.46722e+07	1.12956e+06	918991	9.5542e+06	1.18803e+06	2.56947e+06	4.23571e+06	1.11624e+06	0	0	0	0	0	0	0	0	68822.8	0	3.10252e+06	2.26455e+06	3.49048e+06
1063	50.2719	116.006	0	938147	2.04567e+06	1.63268e+06	1.8952e+06	3.40688e+06	671530	764884	3.00991e+06	1.34251e+06	2.87968e+07	3.76304e+07	2.41831e+07	1.83993e+07	2.48284e+07	3.50021e+07	1.72893e+07	3.44648e+07	3.16665e+07	2.34064e+07	9.99127e+06	9.23779e+06	1.03569e+07
1064	50.545	279.232	1.63696e+08	7.40998e+07	8.03686e+07	1.04395e+08	2.67385e+07	3.54382e+08	1.50076e+08	1.5992e+08	4.61264e+07	2.39186e+07	5.64402e+07	6.45507e+07	7.20252e+07	3.41744e+07	5.33848e+07	1.28247e+08	7.14419e+07	7.09365e+07	1.02476e+08	3.52756e+07	8.71544e+07	8.56216e+07	8.93242e+07
1065	50.545	281.248	2.35035e+08	1.57811e+08	9.11135e+07	1.71916e+08	6.91527e+07	5.64253e+08	2.09044e+08	2.74184e+08	9.9364e+07	7.33365e+07	8.94672e+07	1.888e+08	1.63541e+08	8.74626e+07	8.39008e+07	2.11609e+08	1.33985e+08	1.46093e+08	1.37088e+08	1.59638e+08	1.42977e+08	1.4254e+08	1.52701e+08
1066	50.545	283.264	3.96194e+08	4.50836e+08	3.81868e+08	7.0375e+08	1.59261e+08	6.39839e+08	2.97319e+08	2.41781e+08	1.79985e+08	1.41073e+08	3.23644e+08	4.20908e+08	3.45273e+08	1.64109e+08	2.87998e+08	6.03743e+08	4.12197e+08	4.00434e+08	3.68857e+08	2.76218e+08	2.90694e+08	2.82002e+08	2.85029e+08
1067	50.5647	284.267	7.42088e+07	8.57933e+07	7.12862e+07	1.37311e+08	2.61851e+07	1.17536e+08	5.51827e+07	4.41183e+07	3.11255e+07	2.57519e+07	5.93151e+07	7.95083e+07	6.4814e+07	3.10988e+07	5.22276e+07	1.15492e+08	7.88001e+07	7.59724e+07	6.86886e+07	5.09245e+07	5.5116e+07	5.47109e+07	4.81698e+07
1068	50.5845	114.664	0	0	0	0	133945	0	0	0	0	0	5.12418e+06	8.6066e+06	2.40261e+06	2.73536e+06	4.13467e+06	2.77943e+06	3.64184e+06	6.18957e+06	5.64495e+06	4.17151e+06	2.18464e+06	1.84066e+06	1.45904e+06
1069	50.5845	115.343	0	0	0	0	122733	0	0	0	0	0	6.95682e+06	8.82209e+06	3.74276e+06	3.83306e+06	4.56511e+06	2.19358e+06	4.23967e+06	6.71617e+06	4.52975e+06	3.86282e+06	2.90726e+06	1.72334e+06	1.97999e+06
1070	50.5845	200.173	0	1.59784e+06	0	0	0	0	0	1.3656e+06	0	0	2.74483e+06	4.09351e+06	5.8163e+06	9.69523e+06	918086	2.32561e+06	5.71033e+06	2.88013e+06	6.0076e+06	6.77186e+06	1.76194e+06	827007	889539
1071	50.5845	209.081	0	0	0	0	0	0	183185	0	0	0	3.01935e+06	5.5874e+06	3.38196e+06	1.90249e+06	3.24033e+06	6.34469e+06	1.74682e+06	2.94427e+06	4.03029e+06	2.67084e+06	994983	381138	438512
1072	50.5847	256.236	9.79949e+07	1.57174e+08	1.08133e+08	2.17051e+08	3.38947e+07	1.93584e+08	6.91689e+07	1.06998e+08	4.26072e+07	2.59175e+07	1.0047e+08	9.46484e+07	1.07329e+08	6.60492e+07	1.00265e+08	1.05198e+08	1.12007e+08	1.16068e+08	1.03742e+08	9.708e+07	9.28667e+07	8.20666e+07	8.62257e+07
1073	50.6276	227.092	1.7559e+06	0	1.08164e+06	0	179614	1.58782e+06	0	0	516411	0	7.11189e+06	1.00737e+07	6.14844e+06	5.35687e+06	7.40212e+06	9.45857e+06	4.71017e+06	7.11048e+06	7.69213e+06	6.98487e+06	2.6067e+06	2.94198e+06	3.08926e+06
1074	50.6302	213.185	0	1.64317e+07	1.61751e+06	1.91336e+06	0	547214	0	7.28391e+06	134704	0	5.13468e+06	3.83286e+06	4.23918e+06	4.63142e+06	3.48317e+06	4.93582e+06	4.71789e+06	5.0086e+06	2.67609e+06	7.06166e+06	2.2667e+06	2.15963e+06	2.96859e+06
1075	50.6332	323.259	0	411160	0	1.93082e+06	0	4.0739e+06	349864	171978	0	0	2.66618e+06	2.43277e+06	2.41953e+06	1.0011e+06	2.15233e+06	2.24977e+06	1.50023e+06	1.83171e+06	3.51407e+06	3.10779e+06	541102	0	1.08003e+06
1076	50.6341	387.275	0	0	229811	3.12805e+06	0	6.33996e+06	0	1.09718e+06	0	0	2.77234e+06	3.76681e+06	3.31176e+06	2.24132e+06	8.13447e+06	8.19921e+06	6.12926e+06	3.74701e+06	1.12561e+07	6.42276e+06	1.53011e+06	1.6958e+06	502677
1077	50.6384	397.332	212387	0	0	0	0	0	0	768072	0	0	2.06028e+07	1.96955e+07	1.70475e+07	1.23352e+07	1.81047e+07	2.3735e+07	1.1427e+07	1.52084e+07	2.14017e+07	1.42969e+07	3.98237e+06	3.96251e+06	5.43555e+06
1078	50.6643	241.217	1.49271e+07	8.06743e+07	1.82122e+07	3.71053e+07	5.93587e+06	2.34413e+07	1.2944e+07	7.357e+07	7.98803e+06	3.15035e+06	1.89652e+07	1.7411e+07	1.94626e+07	1.14071e+07	1.75039e+07	1.53882e+07	2.44256e+07	2.49756e+07	1.85817e+07	3.41948e+07	2.56515e+07	2.39327e+07	2.33512e+07
1079	50.6935	213.076	0	0	1.00093e+06	5.81425e+06	5.69664e+06	325513	6.11226e+06	411964	253726	1.09507e+07	1.12156e+07	1.07629e+07	6.36691e+06	6.69343e+06	6.95189e+06	1.89486e+07	5.44391e+06	9.14205e+06	7.2282e+06	9.19393e+06	3.61891e+06	3.61169e+06	3.53632e+06
1080	50.6937	201.076	0	0	0	0	0	0	254368	0	0	0	1.17485e+07	1.39351e+07	6.4675e+06	6.66161e+06	7.26774e+06	1.30984e+07	3.93029e+06	1.22628e+07	1.49543e+07	6.90188e+06	2.48676e+06	1.67885e+06	2.82165e+06
1081	50.6937	253.217	5.23908e+07	9.90091e+07	3.11719e+07	6.32519e+07	1.06567e+07	7.44973e+07	8.77889e+06	2.13014e+08	2.63567e+07	1.34562e+07	1.93318e+07	6.03955e+07	1.93611e+07	1.28361e+07	1.44475e+07	2.77491e+07	2.48225e+07	2.20884e+07	2.39822e+07	5.00978e+07	5.64746e+07	5.40419e+07	5.44484e+07
1082	50.7011	183.032	2.12911e+06	2.56798e+06	1.00665e+07	9.72902e+06	3.04989e+06	5.78516e+06	2.40907e+06	2.86752e+06	9.08e+06	3.48992e+06	4.16571e+06	9.18343e+06	4.22986e+06	1.44221e+07	3.1689e+06	3.09672e+06	4.91801e+06	2.86554e+06	7.33834e+06	4.2763e+06	5.83061e+06	5.56567e+06	5.36422e+06
1083	50.7398	225.185	2.36964e+06	1.10412e+07	1.56768e+06	4.31327e+06	887973	3.56505e+06	8.87681e+06	1.94212e+07	1.73752e+06	443837	1.46764e+06	2.59079e+06	2.23518e+06	2.12619e+06	1.71003e+06	1.79492e+06	1.52954e+06	1.91766e+06	1.32245e+06	3.79922e+06	2.98329e+06	4.08767e+06	3.63081e+06
1084	50.7419	411.385	431923	8.03777e+06	8.09032e+06	9.7675e+06	7.54846e+06	8.81963e+06	7.06471e+06	7.13574e+06	8.73607e+06	3.55344e+06	682030	4.7544e+06	3.75229e+06	550789	0	8.56279e+06	1.7084e+06	5.60334e+06	876752	471116	4.79378e+06	5.21564e+06	5.05368e+06
1085	50.755	250.011	1.91309e+07	5.04811e+07	5.79917e+07	4.12223e+07	3.78676e+07	2.58048e+06	3.5327e+07	3.2331e+07	5.68853e+07	2.06668e+07	0	0	0	0	0	0	0	0	141038	0	2.39609e+07	2.21622e+07	2.2428e+07
1086	50.7682	404.265	2.2706e+07	1.63548e+07	0	235202	355481	4.09255e+06	3.69257e+06	0	0	0	0	0	0	0	152316	286647	0	0	244542	122329	3.3619e+06	2.53646e+06	2.71672e+06
1087	50.8118	206.996	4.68113e+06	3.27482e+06	2.75403e+06	0	625241	6.83188e+06	915487	1.87793e+06	6.07773e+06	2.99143e+06	441741	0	0	525221	222521	0	770767	151526	302144	304020	2.47769e+06	1.96076e+06	2.41315e+06
1088	50.8554	251.003	9.88325e+06	2.52598e+07	3.08857e+07	2.01465e+07	1.7357e+07	2.67868e+06	1.90725e+07	1.6397e+07	2.71051e+07	9.60893e+06	0	1.31587e+06	0	211547	0	318594	56734.6	0	0	0	1.20687e+07	1.05179e+07	1.23334e+07
1089	50.8554	383.352	2.38324e+06	2.43461e+07	2.42732e+07	3.66287e+07	1.73246e+07	3.31772e+07	1.86444e+07	2.53353e+07	1.95086e+07	1.02955e+07	9.31087e+06	3.97966e+06	1.15905e+07	2.59538e+06	2.67673e+06	2.57785e+07	1.69159e+07	1.91544e+07	6.76512e+06	8.67844e+06	1.81832e+07	1.7049e+07	1.72683e+07
1090	51.1121	601.533	326256	4.55107e+06	2.77089e+06	3.08236e+06	0	4.24129e+06	1.35818e+06	1.66671e+06	0	592690	799407	245230	463676	958286	526766	292725	241527	136742	829920	515799	660271	719340	182273
1091	51.2737	369.337	1.74046e+06	6.84644e+06	5.38957e+06	7.23603e+06	3.50595e+06	7.99212e+06	5.21331e+06	7.09305e+06	5.41222e+06	3.27669e+06	3.55122e+07	4.37615e+07	2.50114e+07	1.90768e+07	3.39386e+07	4.37551e+07	2.0888e+07	3.44587e+07	4.2075e+07	2.42981e+07	1.445e+07	1.07753e+07	1.39853e+07
1092	51.4503	398.335	0	0	0	0	0	0	0	0	0	0	4.6671e+06	5.86272e+06	3.76998e+06	3.46515e+06	5.64566e+06	5.84519e+06	3.0175e+06	3.751e+06	5.87603e+06	4.59044e+06	0	693722	140889
1093	51.51	241.071	4.98697e+07	5.87414e+06	2.36375e+07	2.10069e+07	1.8095e+07	2.70208e+07	5.61215e+06	1.20938e+07	1.78295e+07	1.41542e+07	1.53308e+07	1.53956e+07	2.30964e+07	1.57131e+07	1.71516e+07	1.41038e+07	1.98637e+07	1.14214e+07	1.85926e+07	3.15377e+07	1.76536e+07	1.71108e+07	1.77966e+07
1094	51.5121	126.935	0	340686	611464	1.97539e+06	1.12687e+06	5.45855e+06	0	1.31495e+06	0	788549	4.77369e+06	5.45571e+06	5.55441e+06	1.22278e+07	5.25621e+06	2.98615e+06	6.3338e+06	4.11249e+06	6.16715e+06	5.02058e+06	1.37231e+06	3.05468e+06	647965
1095	51.5121	327.29	1.14782e+07	2.40223e+07	2.7504e+07	4.39912e+07	1.67368e+07	3.67055e+07	1.25895e+07	3.37955e+07	2.83905e+07	1.47257e+07	2.83751e+07	2.47213e+07	9.96289e+06	9.83521e+06	1.85828e+07	2.46224e+07	2.13099e+07	4.42737e+07	1.71089e+07	1.50672e+07	2.30352e+07	2.4789e+07	2.71395e+07
1096	51.5127	499.364	366847	0	1.4615e+06	1.80957e+06	225860	1.08118e+06	0	0	762239	0	3.98713e+07	3.41872e+07	3.89217e+07	3.56089e+07	2.90286e+07	3.89467e+07	2.74049e+07	5.10509e+07	6.53796e+07	2.92036e+07	1.24058e+07	1.03189e+07	1.12053e+07
1097	51.5133	143.034	2.30316e+07	7.58017e+06	6.53244e+06	1.14103e+06	3.15806e+06	1.14399e+07	2.30421e+06	4.23637e+06	1.00319e+07	2.07799e+06	1.34276e+07	1.60171e+07	1.22264e+07	6.20765e+06	1.1983e+07	1.67022e+07	5.57741e+06	1.512e+07	1.86976e+07	8.09833e+06	5.54592e+06	7.64118e+06	8.41803e+06
1098	51.5289	355.322	1.12914e+07	2.58283e+07	3.03029e+07	6.91368e+07	2.14032e+07	5.50412e+07	2.06251e+07	3.71493e+07	3.4204e+07	1.36237e+07	2.94534e+07	5.17909e+06	2.09345e+07	1.75664e+07	2.77392e+07	3.95337e+07	4.27243e+07	4.524e+07	2.50593e+07	1.82315e+07	2.81224e+07	2.87251e+07	2.40251e+07
1099	51.5289	525.14	303448	1.13453e+06	2.33288e+06	2.16362e+06	2.16127e+06	3.17841e+06	0	2.35606e+06	516592	1.82021e+06	0	0	0	0	0	0	0	0	0	0	0	777075	301464
1100	51.5438	242.075	1.81852e+06	0	2.27355e+06	4.08275e+06	2.37301e+06	2.42693e+06	0	215306	879848	1.05389e+06	913245	1.39212e+06	1.91763e+06	1.30011e+06	457110	1.03569e+06	1.25447e+06	397677	807821	2.41186e+06	1.07729e+06	1.23503e+06	253532
1101	51.5578	328.293	1.75301e+06	5.01302e+06	5.81269e+06	9.18926e+06	3.45208e+06	8.35793e+06	2.95992e+06	8.15436e+06	5.72451e+06	2.98689e+06	5.40674e+06	3.87139e+06	2.46374e+06	1.7092e+06	4.26313e+06	5.44948e+06	4.96457e+06	6.93338e+06	3.63427e+06	2.09213e+06	4.91112e+06	4.54051e+06	4.92729e+06
1102	51.5715	384.356	0	5.73532e+06	4.7392e+06	8.94417e+06	4.54778e+06	7.82945e+06	2.05528e+06	7.0101e+06	4.61137e+06	2.65758e+06	1.70235e+06	3.14225e+06	1.85528e+06	1.07919e+06	1.12322e+06	6.56625e+06	4.17561e+06	4.77901e+06	1.86303e+06	1.66768e+06	4.34068e+06	4.24567e+06	2.9772e+06
1103	51.5715	500.367	0	0	344256	0	0	0	0	0	0	0	1.24232e+07	9.71381e+06	1.28292e+07	1.00653e+07	9.2665e+06	1.18049e+07	8.22172e+06	1.57442e+07	1.91604e+07	9.84181e+06	3.59104e+06	3.3944e+06	2.83049e+06
1104	51.5889	222.991	6.42758e+06	3.28828e+07	6.28814e+06	1.1465e+07	1.7383e+07	5.26668e+06	3.8639e+06	1.03377e+07	1.03656e+07	5.83502e+06	2.42128e+06	6.29611e+06	4.33088e+06	3.39509e+06	912262	6.39227e+06	5.49469e+06	1.1236e+07	7.16817e+07	7.7744e+06	1.16729e+07	1.08659e+07	1.00036e+07
1105	51.6014	187.097	242928	475650	0	0	385603	1.08234e+06	0	739093	723222	0	4.01091e+07	4.45512e+07	3.86082e+07	3.43495e+07	2.73323e+07	3.77193e+07	3.02373e+07	3.24599e+07	5.20095e+07	4.07187e+07	1.07543e+07	1.03195e+07	1.04748e+07
1106	51.6202	245.103	0	0	0	0	0	0	0	0	0	486904	3.03295e+06	2.51022e+06	2.17851e+06	1.89744e+06	1.43965e+06	4.74894e+06	1.06891e+06	1.89741e+06	2.13402e+06	1.40223e+06	184312	150752	0
1107	51.6202	370.303	0	0	458594	1.65909e+06	0	1.61707e+06	0	768007	0	0	7.66333e+06	9.92088e+06	5.75993e+06	4.00564e+06	7.24426e+06	9.97877e+06	4.249e+06	6.93391e+06	9.24644e+06	5.20737e+06	2.4301e+06	2.13532e+06	1.17268e+06
1108	51.6232	211.06	6.11117e+07	2.30997e+07	4.42262e+07	4.57548e+07	3.71179e+07	6.73839e+07	2.87385e+07	2.92258e+07	2.35541e+07	1.73362e+07	6.43119e+07	5.35454e+07	6.78626e+07	6.52418e+07	6.86467e+07	4.77525e+07	6.8119e+07	4.87839e+07	5.38394e+07	6.15011e+07	4.44655e+07	4.33711e+07	4.80097e+07
1109	51.6296	389.246	2.27848e+07	1.16926e+07	0	0	295056	5.76839e+06	6.0838e+06	0	0	0	527737	166381	572984	0	522545	600863	0	505407	707552	393682	2.00942e+06	2.25083e+06	2.6167e+06
1110	51.66	717.507	0	3.81721e+07	0	0	235636	234863	4.38786e+06	517066	2.66243e+06	491785	448825	631155	0	525880	1.55337e+06	134306	0	0	0	0	1.94342e+06	2.01923e+06	1.90431e+06
1111	51.6707	175.006	7.99634e+06	2.55288e+07	6.19852e+06	7.23838e+06	1.46728e+07	1.22948e+07	2.7229e+06	1.74318e+07	9.6938e+07	9.63663e+06	0	0	0	0	0	0	0	1.47108e+07	0	0	1.31772e+07	1.39269e+07	1.33332e+07
1112	51.9718	263.165	0	0	0	0	0	0	0	0	0	0	2.95989e+06	3.34714e+06	3.0517e+06	2.51326e+06	6.73837e+06	3.54505e+06	1.62848e+06	2.46969e+06	4.47976e+06	1.84629e+06	375689	343524	0
1113	52.0335	277.038	5.64208e+06	6.91779e+06	1.69563e+07	8.53885e+06	6.60092e+06	4.15909e+06	6.72838e+06	2.06311e+06	5.66381e+06	1.98681e+06	130268	0	124940	0	47326.6	0	0	0	0	0	3.95897e+06	3.34086e+06	4.97291e+06
1114	52.0773	389.124	0	829592	2.74136e+06	4.10089e+06	1.11014e+06	2.50542e+06	612505	570965	1.54557e+06	1.22104e+06	0	0	0	364561	0	0	0	0	0	97774.7	859481	1.14481e+06	185969
1115	52.3898	326.278	0	0	0	0	0	314793	0	0	0	0	1.95055e+06	2.4999e+06	3.28989e+06	2.0941e+06	2.0786e+06	2.50054e+06	2.0254e+06	1.74791e+06	4.54901e+06	1.48111e+06	498647	423369	376251
1116	52.3921	369.301	1.17011e+06	6.84611e+06	5.38883e+06	7.81002e+06	3.50392e+06	7.25184e+06	3.18182e+06	5.55097e+06	4.188e+06	3.22747e+06	3.47979e+07	4.44399e+07	2.5267e+07	1.77797e+07	3.371e+07	4.22929e+07	2.01335e+07	3.35372e+07	4.20624e+07	2.37588e+07	9.30171e+06	9.85199e+06	7.74249e+06
1117	52.4309	257.176	1.32438e+07	2.81163e+07	1.26482e+07	1.51899e+07	6.58737e+06	1.13195e+07	3.58788e+07	2.18736e+07	7.58764e+06	4.00721e+06	5.64753e+06	1.30073e+07	6.72083e+06	1.04001e+07	6.98552e+06	7.53724e+06	5.52998e+06	7.40158e+06	1.70945e+07	6.11245e+06	1.02672e+07	1.15853e+07	9.9968e+06
1118	52.4309	511.364	0	0	0	0	0	0	0	0	0	0	881562	739610	1.20425e+06	2.52911e+06	1.60174e+06	788948	1.46244e+06	1.59404e+06	2.55913e+06	1.62863e+06	0	362112	350140
1119	52.4336	599.468	0	331769	707537	372227	436281	499390	0	690330	392785	1.44084e+06	4.70955e+06	2.67938e+06	4.29166e+06	1.00852e+06	5.234e+06	3.27195e+06	7.40509e+06	2.99269e+06	7.56187e+06	6.13209e+06	1.33799e+06	2.16044e+06	2.39335e+06
1120	52.4428	212.064	6.76488e+06	273188	3.46873e+06	4.42496e+06	3.74451e+06	6.22292e+06	2.14451e+06	2.53983e+06	1.37207e+06	868257	6.65804e+06	5.25715e+06	6.59996e+06	6.19479e+06	6.10415e+06	4.09755e+06	7.18554e+06	5.23057e+06	6.44956e+06	5.3655e+06	4.67415e+06	5.12891e+06	3.92661e+06
1121	52.4428	495.13	5.8617e+06	5.89119e+06	9.18753e+06	8.5259e+06	8.92006e+06	7.7189e+06	6.04006e+06	4.27305e+06	5.5637e+06	6.23867e+06	0	0	0	0	0	0	0	0	0	0	3.78932e+06	4.05127e+06	4.08306e+06
1122	52.4573	401.246	7.52597e+06	1.80324e+07	0	0	160063	4.37793e+07	2.3176e+07	1.36436e+06	0	0	435684	189062	151612	0	0	760197	0	292734	828667	454980	4.22981e+06	4.23446e+06	5.01978e+06
1123	52.4573	449.221	4.18708e+06	7.08005e+06	1.05376e+07	3.90801e+06	2.87319e+06	8.29858e+06	3.7457e+06	1.05408e+07	8.4348e+06	4.6953e+06	0	0	0	0	0	0	0	0	0	0	4.85007e+06	4.70283e+06	4.44953e+06
1124	52.4817	296.231	1.49483e+07	3.98298e+07	1.55043e+07	2.04296e+07	7.65761e+06	4.69333e+07	3.92935e+07	2.51168e+07	6.15615e+06	3.77883e+06	1.31415e+07	2.17328e+07	2.27205e+07	2.12594e+07	1.95963e+07	1.49778e+07	1.02142e+07	9.44042e+06	2.95933e+07	2.92632e+07	1.88553e+07	1.90259e+07	1.4357e+07
1125	52.4909	325.274	0	410590	683060	2.68539e+06	427586	3.8771e+06	0	0	1.04138e+06	201046	9.89826e+06	1.16271e+07	9.1518e+06	1.13887e+07	1.3753e+07	1.20734e+07	9.62288e+06	1.32971e+07	1.04405e+07	9.72745e+06	3.79193e+06	5.76325e+06	5.49545e+06
1126	52.5018	351.039	8.79946e+06	7.32072e+06	1.34652e+07	1.26533e+07	6.73715e+06	821879	1.0092e+07	1.58332e+06	4.47815e+06	4.64061e+06	0	0	0	0	0	0	0	0	0	0	3.82989e+06	3.76301e+06	3.81159e+06
1127	52.5524	496.132	1.49143e+06	791030	2.55768e+06	1.73509e+06	2.02712e+06	1.73467e+06	0	1.08128e+06	1.31549e+06	1.36984e+06	0	0	0	0	0	0	105452	0	0	0	806341	638254	348203
1128	52.5688	225.222	2.40261e+06	7.91507e+06	1.34615e+06	1.56846e+06	886678	1.56062e+06	9.12668e+06	6.57108e+06	1.77906e+06	444325	1.16585e+06	803877	885673	1.33173e+06	447188	985644	947897	1.20729e+06	630671	965538	1.85001e+06	2.19446e+06	2.25662e+06
1129	52.5748	229.002	2.38335e+06	2.43944e+06	8.56513e+06	3.02698e+06	2.50087e+06	209991	3.61007e+06	1.28738e+06	3.17575e+06	5.05282e+06	0	0	0	0	0	0	0	932500	0	1.7982e+06	2.30455e+06	913155	2.04952e+06
1130	52.8478	151.042	8.29244e+07	7.19936e+07	7.58429e+07	9.94027e+07	7.62737e+07	3.08447e+07	8.52579e+07	3.05079e+07	1.56064e+08	8.28154e+07	6.15271e+06	6.79686e+06	6.98181e+06	1.2266e+07	1.11802e+07	8.15507e+06	8.99109e+06	6.81562e+06	8.61864e+06	9.68214e+06	4.61806e+07	4.80704e+07	4.84493e+07
1131	52.8826	600.471	0	0	0	0	155465	194692	0	0	0	274982	1.62428e+06	1.21166e+06	1.97806e+06	3.45547e+06	1.89328e+06	1.45391e+06	2.74524e+06	943581	2.76916e+06	1.72905e+06	731308	613848	664678
1132	53.2709	247.118	702446	0	0	0	0	0	0	0	0	0	7.12091e+06	9.2737e+06	6.77258e+06	4.55641e+06	5.15256e+06	8.49986e+06	3.99878e+06	9.09236e+06	5.81446e+06	7.29383e+06	0	610671	757765
1133	53.2741	539.358	0	0	0	0	0	0	0	0	0	0	1.1368e+06	877579	1.33441e+06	2.27497e+06	1.24132e+06	1.65264e+06	1.10171e+06	1.1262e+06	2.61237e+06	921965	142713	547149	317214
1134	53.2844	380.219	3.00789e+07	2.25671e+07	1.65677e+07	3.13311e+07	2.78232e+07	6.03206e+07	2.18567e+07	9.47491e+07	1.57374e+06	1.61418e+06	630535	2.99734e+07	1.53584e+07	1.77863e+07	737531	407519	1.15061e+06	925924	2.39146e+07	1.65873e+07	2.05152e+07	2.39467e+07	2.37245e+07
1135	53.294	342.272	0	0	0	371607	0	1.04586e+06	300954	175139	0	0	1.19829e+07	1.72223e+07	7.63296e+06	9.94821e+06	1.20809e+07	1.7142e+07	7.58324e+06	8.0935e+06	1.21617e+07	6.2834e+06	4.31739e+06	4.6906e+06	5.51149e+06
1136	53.2974	379.216	1.5601e+08	1.30983e+08	8.97205e+07	1.64981e+08	1.40479e+08	3.99466e+08	1.13079e+08	4.7628e+08	1.04253e+07	1.05017e+07	1.12386e+07	1.61364e+08	7.34708e+07	9.34409e+07	5.48242e+06	6.70123e+06	9.22024e+06	1.44879e+07	1.28642e+08	8.48017e+07	1.19428e+08	1.1283e+08	1.13555e+08
1137	53.2996	439.415	0	2.89318e+06	2.184e+06	2.81714e+06	2.41143e+06	1.56652e+06	3.2444e+06	1.58292e+06	2.86333e+06	1.51159e+06	0	0	99681.7	0	0	376818	342385	695565	0	0	818524	914072	1.04494e+06
1138	53.3127	310.21	261417	0	246839	783823	383150	723290	0	442199	0	0	2.37522e+06	2.77922e+06	4.04695e+06	6.20745e+06	3.25009e+06	2.1116e+06	2.89078e+06	2.26071e+06	3.41501e+06	4.28413e+06	1.17626e+06	1.06937e+06	862823
1139	53.314	376.233	8.06511e+07	9.68693e+07	1.50279e+06	2.74527e+06	397814	2.69845e+07	2.05798e+07	2.8495e+06	707026	224167	0	137293	0	751921	340142	395392	0	0	0	1.50599e+06	1.01936e+07	1.06844e+07	9.94142e+06
1140	53.3147	264.026	3.61133e+06	702603	2.45399e+06	5.52989e+06	3.2518e+06	602122	5.89911e+06	244523	0	233266	0	0	0	0	0	0	0	0	0	0	1.51676e+06	1.02952e+06	708840
1141	53.3253	158.126	5.75332e+06	6.36531e+06	1.74534e+07	1.06878e+07	7.60103e+06	1.04898e+07	7.64176e+06	8.81843e+06	9.22504e+06	9.10386e+06	1.40548e+07	1.11516e+07	1.18583e+07	1.56091e+07	1.11558e+07	1.26169e+07	1.96368e+07	1.23127e+07	1.84637e+07	1.68655e+07	5.60458e+06	6.18188e+06	6.0183e+06
1142	53.3253	261.007	2.61305e+07	1.05922e+08	3.00807e+08	7.80865e+07	1.36734e+08	6.64252e+07	1.56371e+08	1.17708e+07	1.00605e+08	9.22109e+07	0	0	0	0	0	0	237366	0	0	0	7.0663e+07	7.17847e+07	7.06624e+07
1143	53.3422	99.0439	1.24674e+07	5.85629e+06	4.87722e+06	9.84332e+06	4.45831e+06	887822	1.64653e+07	8.7447e+06	1.33024e+07	7.43775e+06	3.06383e+06	5.49925e+06	5.1042e+06	2.13579e+06	5.78397e+06	5.97225e+06	2.88768e+06	5.46091e+06	2.29565e+06	6.39971e+06	1.37649e+07	5.00395e+06	1.52026e+07
1144	53.3444	461.362	2.53247e+06	1.845e+06	4.50691e+06	3.36933e+06	1.62216e+06	2.0311e+06	0	3.5173e+06	9.3111e+06	487772	3.83012e+06	4.99457e+06	340649	138790	2.66906e+06	3.55832e+06	791171	3.41146e+06	392807	1.99927e+06	2.62141e+06	2.19764e+06	2.54283e+06
1145	53.3614	300.262	3.37466e+07	1.25202e+07	1.4707e+07	1.37205e+07	7.76388e+06	4.41589e+07	3.97919e+07	2.60858e+07	5.54383e+07	7.68705e+07	8.39352e+06	2.73142e+07	5.27867e+06	3.70354e+06	5.2273e+06	1.27057e+07	8.30227e+06	8.96749e+06	7.08255e+06	5.29603e+06	1.90455e+07	2.0389e+07	2.04975e+07
1146	53.3861	155.001	3.8106e+06	3.36792e+06	1.04553e+07	6.80042e+06	4.86055e+06	8.63844e+06	3.60456e+06	7.48814e+06	5.24524e+06	4.31816e+06	3.22456e+06	401125	2.87212e+06	3.53084e+06	1.58358e+06	2.56086e+06	2.39347e+06	1.34368e+06	4.06012e+06	2.32158e+06	5.01676e+06	4.46498e+06	3.46095e+06
1147	53.3957	149.023	3.29586e+08	9.76162e+07	1.25135e+08	2.52006e+08	9.80524e+07	2.77754e+07	1.02604e+08	2.32245e+07	4.80297e+07	1.06721e+08	7.52242e+06	8.73192e+06	8.86561e+06	7.01375e+06	1.0048e+07	5.37747e+06	9.08341e+06	5.95364e+06	2.08224e+07	1.17727e+07	5.06567e+07	4.78368e+07	2.1897e+07
1148	53.7386	262.01	1.01994e+06	8.23973e+06	2.62137e+07	5.22318e+06	1.23658e+07	5.33373e+06	1.3144e+07	484104	8.47919e+06	7.53244e+06	0	0	0	0	0	0	142671	0	0	0	5.93132e+06	5.99413e+06	5.72796e+06
1149	53.7422	486.352	0	0	0	0	0	0	0	0	0	0	3.8762e+06	2.3945e+06	3.61174e+06	2.54985e+06	1.94982e+06	3.5904e+06	2.43228e+06	3.6048e+06	5.63618e+06	2.28532e+06	1.04916e+06	703867	1.00257e+06
1150	54.1317	435.201	0	0	0	0	129621	234622	0	723971	0	0	755473	1.00164e+06	97030.4	1.29254e+08	300068	258728	667440	368566	861646	761682	6.44336e+06	6.60159e+06	6.60936e+06
1151	54.1465	86.0316	0	331173	0	0	0	225144	0	0	0	0	2.1877e+06	3.4618e+06	1.1342e+06	1.16411e+06	2.40096e+06	4.53767e+06	803184	2.52004e+06	2.29565e+06	1.33469e+06	170267	133083	0
1152	54.1465	203.091	0	582760	1.2068e+06	0	0	163927	0	179447	379927	0	5.21562e+06	7.5898e+06	4.24356e+06	7.46107e+06	5.76588e+06	7.1461e+06	4.06438e+06	5.23765e+06	6.802e+06	3.67198e+06	1.72031e+06	1.16771e+06	1.15914e+06
1153	54.1516	215.092	0	0	0	0	0	0	0	0	0	0	2.26666e+07	3.56404e+07	1.73818e+07	1.66127e+07	1.81677e+07	2.7514e+07	1.33147e+07	2.63146e+07	3.4004e+07	1.91039e+07	1.04005e+07	9.89787e+06	9.32212e+06
1154	54.1545	122.974	4.69572e+07	5.10641e+07	2.20698e+08	9.19412e+07	9.56678e+07	5.50273e+07	5.91087e+07	3.03514e+07	3.94103e+07	4.10221e+07	1.03194e+07	1.96137e+07	1.32492e+07	4.73549e+06	7.07263e+06	1.57604e+07	7.64547e+06	2.4697e+07	2.43619e+07	1.33325e+07	5.62798e+07	5.73103e+07	6.0586e+07
1155	54.1545	216.095	0	0	0	0	0	0	0	0	0	0	1.41737e+06	2.45848e+06	1.18474e+06	847520	942152	1.65803e+06	832726	1.35589e+06	474421	269300	154677	0	399835
1156	54.1561	131.022	0	579193	2.45011e+06	1.09727e+06	678069	1.22236e+06	0	900303	746689	864199	3.95106e+06	3.94702e+06	1.8584e+06	1.08316e+06	3.40583e+06	4.01778e+06	1.68898e+06	2.55587e+06	2.4638e+06	1.62606e+06	561254	951466	1.70195e+06
1157	54.1568	239.055	4.52326e+06	2.7796e+06	6.3404e+06	5.86547e+06	3.37557e+06	4.98358e+06	2.16897e+06	1.10233e+06	4.94851e+06	1.2767e+06	4.03192e+06	2.95344e+06	2.03896e+06	4.19009e+06	2.59238e+06	2.82802e+06	3.05562e+06	2.40206e+06	2.75599e+06	4.04175e+06	3.90752e+06	3.76701e+06	3.42728e+06
1158	54.1625	230.996	899679	4.85899e+06	1.06899e+07	3.04362e+06	6.0902e+06	2.11277e+06	6.98024e+06	370572	3.73578e+06	3.1765e+06	0	0	0	0	0	0	0	0	0	0	2.44946e+06	2.39943e+06	2.6294e+06
1159	54.1625	742.537	4.08799e+06	1.18834e+07	1.38587e+06	705476	2.15065e+06	4.13382e+06	1.51379e+07	7.90009e+06	5.72785e+06	2.59008e+06	2.0191e+06	2.55324e+06	293552	147624	131265	905311	1.56484e+06	313190	1.13643e+06	378812	2.70276e+06	2.87948e+06	3.01419e+06
1160	54.1654	375.23	3.98113e+08	4.6598e+08	6.60032e+06	1.20143e+07	5.66166e+06	1.40647e+08	1.03553e+08	1.41476e+07	5.38348e+06	4.29721e+06	2.63423e+06	540022	718117	6.04808e+06	1.8279e+06	4.01884e+06	1.67879e+06	639161	2.06132e+06	7.89074e+06	4.80897e+07	5.32987e+07	3.42637e+07
1161	54.1908	224.061	1.31953e+07	8.41493e+06	1.84513e+07	3.989e+07	8.23471e+06	1.0313e+07	1.03155e+07	2.33801e+06	4.4494e+06	1.76396e+07	686236	1.18466e+06	2.75085e+06	1.17785e+06	121861	4.50645e+06	944063	3.65459e+06	5.53933e+06	1.49779e+07	6.80721e+06	9.56456e+06	6.65833e+06
1162	54.2002	285.243	1.15573e+07	2.1181e+07	1.11406e+07	9.74634e+06	6.60696e+06	7.99804e+06	2.32714e+07	1.68502e+07	2.58051e+07	2.2457e+07	4.9181e+06	2.22327e+07	3.44725e+06	3.8004e+06	3.43829e+06	4.04139e+06	5.02907e+06	6.51744e+06	6.39462e+06	3.7923e+06	1.11882e+07	1.19249e+07	1.19937e+07
1163	54.2002	326.111	0	0	0	0	0	0	0	0	0	0	2.04039e+06	5.06146e+07	1.96786e+06	3.74405e+06	1.08108e+07	3.75839e+06	8.55065e+06	2.88985e+07	2.0288e+06	2.08766e+06	5.271e+06	5.57485e+06	5.28828e+06
1164	54.2034	85.0283	3.9581e+06	8.89337e+06	9.53054e+06	4.90857e+06	9.98312e+06	3.05372e+07	4.87566e+06	7.75222e+06	8.40487e+06	4.56647e+06	9.64233e+07	9.29185e+07	5.4348e+07	5.14291e+07	9.1281e+07	1.2088e+08	4.56855e+07	7.1792e+07	8.19111e+07	6.39741e+07	2.90647e+07	2.94053e+07	3.41661e+07
1165	54.2034	337.093	1.59121e+06	3.87074e+06	3.46136e+06	4.17145e+06	1.83324e+06	5.66908e+06	359420	2.33207e+06	3.16742e+06	394093	0	0	0	0	0	0	0	0	0	0	1.64576e+06	1.67914e+06	1.05855e+06
1166	54.2144	325.107	0	0	0	0	0	0	0	0	0	0	1.07474e+07	2.61733e+08	1.13909e+07	2.00595e+07	6.59217e+07	2.17586e+07	4.96837e+07	1.59762e+08	1.39197e+07	1.13299e+07	2.91226e+07	2.91213e+07	2.95045e+07
1167	54.2283	744.553	857317	2.65185e+06	0	267737	1.24222e+06	2.60306e+06	1.08882e+07	3.11772e+06	3.07391e+06	1.57775e+06	2.24134e+06	1.94152e+06	81523.3	0	336051	0	0	0	242865	229109	1.44875e+06	1.20507e+06	1.15241e+06
1168	54.2317	130.021	0	1.31419e+06	1.1642e+06	1.81292e+06	2.99309e+06	6.41121e+06	0	553908	2.44742e+06	2.05072e+06	3.0468e+07	2.94216e+07	1.688e+07	1.53598e+07	2.78491e+07	3.50778e+07	1.44469e+07	2.29866e+07	2.52574e+07	1.59236e+07	8.64003e+06	9.0699e+06	1.13017e+07
1169	54.2668	234.015	727098	2.27757e+06	2.71132e+06	316078	1.35068e+06	179694	834716	214579	4.80563e+06	7.4478e+06	0	0	0	0	0	0	0	157395	0	0	1.29965e+06	853048	1.00133e+06
1170	54.2933	417.24	4.00534e+06	1.25111e+07	553662	283133	167417	1.22871e+06	1.2743e+07	4.17048e+07	442088	400615	446767	0	71689.4	476912	232395	0	895790	224064	280130	4.60471e+06	5.11088e+06	4.8218e+06	4.88187e+06
1171	54.2933	716.523	924146	8.29246e+06	768062	345469	1.0181e+06	715807	1.37114e+07	2.5226e+06	7.05459e+06	2.2186e+06	1.83865e+06	3.3082e+06	121654	0	265840	653285	238690	313786	500680	408911	1.93782e+06	1.94402e+06	1.50217e+06
1172	54.6196	202.017	1.18284e+07	1.44722e+06	239919	2.83605e+06	2.22869e+06	3.89391e+06	3.86977e+06	3.37213e+06	1.37305e+06	664506	7.15991e+06	1.32617e+06	4.48483e+06	3.47918e+06	9.11911e+06	5.58235e+06	8.2036e+06	4.62963e+06	5.50615e+06	8.1552e+06	5.33674e+06	5.09292e+06	5.29596e+06
1173	55.0301	128.616	0	0	0	0	0	322200	0	0	0	0	4.97427e+06	4.5925e+06	1.72268e+06	612566	4.08119e+06	5.98525e+06	2.01115e+06	1.56212e+06	3.6129e+06	2.09083e+06	1.72878e+06	1.3132e+06	873748
1174	55.0301	241.18	3.19969e+06	3.78558e+07	3.5282e+06	5.35046e+06	3.0152e+06	4.83308e+06	967260	1.3831e+07	1.4518e+06	980395	5.29931e+06	5.31162e+06	6.75602e+06	5.71624e+06	4.77826e+06	6.46348e+06	5.11563e+06	6.03609e+06	9.41014e+06	6.51883e+06	3.01633e+06	7.61776e+06	2.24298e+06
1175	55.0397	643.493	0	249688	0	0	0	0	0	0	0	0	2.94122e+06	1.802e+06	2.57273e+06	2.50203e+06	1.00559e+06	6.37896e+06	1.41297e+06	2.29403e+06	1.00189e+06	2.17843e+06	887004	835633	263649
1176	55.0713	290.075	0	1.11673e+07	3.41709e+07	0	351483	296548	0	0	0	5.87609e+06	2.73071e+06	2.0107e+06	1.33297e+06	6.59432e+06	9.65581e+06	1.30891e+06	1.81524e+06	368647	319694	2.31254e+06	264771	1.50788e+06	379775
1177	55.0713	298.246	1.09583e+07	8.28724e+06	1.19064e+07	1.56874e+07	1.26458e+07	3.94862e+07	2.2784e+07	2.02136e+07	2.68935e+07	4.85772e+07	1.83205e+07	5.0769e+07	3.12328e+07	3.78883e+07	2.71581e+07	2.00859e+07	2.3702e+07	1.7851e+07	4.09046e+07	4.27456e+07	2.38883e+07	2.31426e+07	2.21653e+07
1178	55.0713	314.241	0	0	0	435208	196551	305436	0	871950	389946	0	1.40876e+07	1.43716e+07	9.79937e+06	1.26504e+07	1.08213e+07	1.6498e+07	1.14328e+07	7.05433e+06	1.39974e+07	1.0405e+07	4.36042e+06	4.89766e+06	4.52927e+06
1179	55.0856	102.027	0	645929	1.28745e+06	763358	1.23556e+06	356389	219239	1.32518e+06	1.9174e+06	919331	988903	589410	788946	710643	199889	418418	420301	446470	326591	848336	361631	735935	1.05915e+06
1180	55.0867	313.238	3.13813e+06	2.96341e+06	3.5383e+06	4.22965e+06	2.56543e+06	3.1441e+06	1.04378e+06	4.49485e+06	2.17637e+06	316008	7.72682e+07	8.43879e+07	5.50133e+07	7.06307e+07	6.50993e+07	8.6156e+07	6.24222e+07	4.12627e+07	7.21476e+07	5.00121e+07	2.86786e+07	2.69746e+07	1.91289e+07
1181	55.1021	503.14	0	0	0	0	0	0	0	0	0	0	7.1038e+06	1.75668e+06	4.08908e+06	536669	1.67997e+07	5.71542e+06	1.4867e+06	450762	1.65945e+06	2.50202e+06	1.47915e+06	1.94164e+06	1.3306e+06
1182	55.4794	497.181	484085	960237	455795	680153	1.18148e+06	191330	0	350081	208964	331445	1.6935e+06	583398	1.47547e+06	2.86869e+06	1.70154e+06	1.82335e+06	3.68619e+06	1.07303e+06	1.24735e+06	1.47307e+06	1.05938e+06	1.68357e+06	358469
1183	55.9116	615.462	0	0	0	0	0	0	0	0	0	0	3.68303e+06	1.21341e+06	3.66464e+06	4.0045e+06	1.48651e+06	1.89388e+06	2.4604e+06	1.52785e+06	3.28362e+06	3.27275e+06	369025	1.16463e+06	712722
1184	55.9123	217.107	821428	1.48806e+06	297043	0	0	1.49557e+06	0	1.37352e+06	2.4647e+06	1.46589e+06	1.07032e+07	9.12512e+06	8.26005e+06	1.21586e+07	9.86586e+06	1.38629e+07	7.2725e+06	8.5302e+06	1.35946e+07	1.04017e+07	3.38831e+06	2.45615e+06	3.17423e+06
1185	55.9295	272.231	3.23392e+07	3.84813e+07	1.74339e+07	2.07404e+07	1.2968e+07	1.72468e+07	8.97835e+07	3.14671e+07	2.42223e+07	2.12517e+07	1.59001e+07	2.99817e+07	1.25607e+07	7.87444e+06	1.03827e+07	1.46488e+07	1.14449e+07	1.50069e+07	1.85209e+07	1.18898e+07	2.23343e+07	2.22764e+07	2.18569e+07
1186	55.9345	246.991	6.02633e+06	2.40522e+07	1.04153e+07	1.20092e+07	1.38381e+07	3.30041e+06	8.6834e+06	1.07131e+07	1.28359e+07	5.25906e+06	0	0	0	0	0	0	0	0	0	0	7.20736e+06	7.40042e+06	6.28285e+06
1187	55.9365	630.481	0	0	0	0	0	0	0	0	0	0	1.98319e+06	1.12114e+06	1.6964e+06	1.64898e+06	460073	1.81313e+06	801171	292930	796988	1.87332e+06	172002	335158	0
1188	55.9374	233.012	1.98528e+07	2.05111e+07	5.61242e+07	1.46804e+07	2.11178e+07	9.64607e+06	2.05821e+07	1.14612e+07	7.10013e+07	9.90017e+07	0	0	0	0	0	0	0	0	0	0	2.25073e+07	2.25462e+07	2.21753e+07
1189	55.9438	257.212	1.2476e+07	2.58395e+07	1.0243e+07	1.15366e+07	6.62656e+06	7.79734e+06	3.6826e+07	1.95259e+07	7.23608e+06	3.73206e+06	5.20745e+06	7.04465e+06	1.31908e+06	4.8528e+06	4.37192e+06	5.15758e+06	4.35238e+06	5.25716e+06	7.58409e+06	4.20492e+06	9.0513e+06	8.53575e+06	9.46538e+06
1190	55.9438	419.257	4.97639e+07	8.85985e+07	1.33752e+06	513046	1.45225e+06	7.53629e+07	745505	1.23275e+07	2.16726e+06	3.69472e+06	551247	126216	1.58614e+06	864341	887781	522289	1.58066e+06	923689	705891	3.93293e+06	1.19618e+07	1.21205e+07	1.23972e+07
1191	55.9503	243.16	2.44619e+06	5.91821e+06	1.35252e+06	890198	976683	948498	9.02194e+06	4.33211e+06	638487	363993	1.63546e+07	2.02794e+07	1.17512e+07	2.31187e+07	1.26295e+07	1.60065e+07	1.54113e+07	1.61976e+07	1.89905e+07	1.11584e+07	5.60555e+06	5.83764e+06	6.24578e+06
1192	55.9617	244.163	0	0	0	0	0	0	0	0	0	0	1.59439e+06	2.53387e+06	1.15787e+06	2.80468e+06	1.07927e+06	1.75878e+06	1.71955e+06	1.91401e+06	2.07527e+06	1.13335e+06	303948	415716	378127
1193	55.9617	525.343	0	0	0	0	0	0	0	0	0	0	623795	179830	912227	936406	381481	711617	463130	759015	1.06082e+06	874129	0	118371	111701
1194	56.7766	585.452	0	0	0	0	128265	0	0	0	0	0	986822	552533	1.11289e+06	1.94074e+06	655986	233033	1.66051e+06	742754	1.27743e+06	2.05791e+06	208461	426892	356816
1195	56.7766	629.478	0	0	0	0	105249	0	0	0	0	0	5.67006e+06	3.38482e+06	3.6599e+06	4.82137e+06	2.19889e+06	3.93681e+06	2.22533e+06	896755	2.28034e+06	4.45563e+06	1.57556e+06	988789	1.641e+06
1196	56.7994	106.98	2.96139e+06	2.49443e+06	3.92216e+06	2.16042e+06	3.11337e+06	6.68371e+06	4.81885e+06	3.91912e+06	2.94473e+06	3.33561e+06	3.05344e+06	7.35946e+06	1.18765e+07	1.52886e+07	3.05382e+06	2.49893e+06	3.62112e+06	2.25417e+06	2.67877e+06	4.30491e+06	3.88833e+06	5.65476e+06	2.74194e+06
1197	56.8142	91.0541	5.75059e+06	363452	616731	1.98667e+06	2.5835e+06	2.94883e+06	0	1.06794e+06	326533	1.01413e+07	207741	1.85981e+06	434743	0	0	1.15331e+06	1.30204e+06	533008	485381	220582	1.95971e+06	2.10078e+06	1.55105e+06
1198	56.8142	321.17	321115	1.23754e+06	529131	727559	590631	3.56407e+06	0	939742	241281	1.66185e+06	1.06034e+06	2.63757e+06	1.95154e+06	1.11357e+06	1.57841e+06	1.76223e+06	1.75046e+06	1.50137e+06	2.91611e+06	2.26425e+06	465597	573214	265725
1199	57.2376	270.215	0	853080	2.35542e+06	2.47074e+06	1.89537e+06	1.34578e+06	1.59763e+06	8.20521e+06	220729	411560	9.26793e+06	8.22856e+06	7.38664e+06	8.15758e+06	6.82627e+06	5.67831e+06	1.75873e+06	8.53484e+06	9.25998e+06	6.25211e+06	1.01357e+06	815197	2.48291e+06
1200	57.6769	269.212	6.41107e+06	1.93805e+07	1.79372e+07	2.16348e+07	1.48905e+07	1.71288e+07	1.85462e+07	5.34507e+07	8.42171e+06	8.75989e+06	4.62246e+07	6.57094e+07	4.96266e+07	5.5428e+07	5.10898e+07	4.36681e+07	3.79225e+07	5.44747e+07	6.50807e+07	4.80407e+07	2.22537e+07	2.25501e+07	2.41274e+07
1201	57.6781	328.127	0	0	0	0	0	0	0	0	0	0	2.72075e+06	3.01456e+07	8.0819e+06	2.70266e+06	1.09715e+07	4.04687e+06	1.24559e+07	2.03452e+07	6.00453e+06	3.01261e+06	2.85899e+06	2.87159e+06	2.15724e+06
1202	57.6835	327.124	338591	0	0	0	0	0	0	0	0	0	1.65835e+07	1.43115e+08	3.94793e+07	1.72663e+07	5.36208e+07	1.97532e+07	6.33841e+07	9.67094e+07	2.90187e+07	1.4011e+07	1.29528e+07	1.23593e+07	1.22252e+07
1203	58.5517	79.956	5.39104e+07	5.67845e+07	7.6503e+07	1.09321e+08	6.20027e+07	4.38754e+07	6.74508e+07	4.44941e+07	4.91039e+07	4.94529e+07	6.54486e+06	7.94051e+06	4.93166e+06	9.55244e+06	6.27117e+06	5.28786e+06	7.5339e+06	7.22529e+06	1.11263e+07	4.22216e+06	4.6554e+07	4.70738e+07	5.24999e+07
1204	58.552	387.238	0	547350	0	0	0	184364	0	0	0	0	1.62383e+07	3.24284e+07	1.91424e+07	1.20717e+07	1.61292e+07	1.90649e+07	1.23943e+07	2.02689e+07	2.865e+07	1.63362e+07	3.5272e+06	4.37618e+06	2.26881e+06
1205	58.5587	96.6967	1.93867e+06	0	800608	1.44332e+06	2.5373e+06	1.44756e+06	0	1.97207e+06	0	825696	0	0	134710	470532	397711	317603	0	201105	245209	0	5.33806e+06	3.2508e+06	866142
1206	58.5615	185.011	3.77121e+07	3.13407e+07	7.71065e+07	9.92467e+07	6.71649e+07	1.65399e+07	7.38391e+07	2.0938e+07	3.4653e+07	5.79017e+07	3.57685e+06	8.50838e+06	1.33246e+07	1.57823e+07	4.53718e+06	3.41341e+06	5.03767e+06	5.47494e+06	1.00796e+07	6.52089e+06	4.28858e+07	4.45905e+07	4.51536e+07
1207	59.4179	95.951	1.57989e+07	2.05536e+07	2.35539e+07	2.91348e+07	2.29664e+07	1.44244e+07	2.45715e+07	1.68293e+07	1.7149e+07	1.98156e+07	2.01157e+06	2.04138e+06	1.5129e+06	2.37415e+06	2.44854e+06	2.38018e+06	3.82325e+06	2.28704e+06	2.6669e+06	709905	1.57914e+07	2.08765e+07	1.63646e+07
1208	59.4179	129.054	2.34319e+09	6.30719e+07	9.72233e+06	1.33752e+08	2.60653e+07	4.25297e+08	2.51956e+08	7.01695e+07	1.37424e+07	2.82179e+08	1.45069e+08	2.97339e+08	9.0796e+07	6.30251e+07	0	2.16375e+08	1.93047e+08	8.7858e+07	1.04503e+08	0	2.12325e+08	2.30187e+08	2.44184e+08
1209	59.4227	98.9547	2.23268e+07	2.96087e+07	3.81882e+07	3.9846e+07	3.16857e+07	2.05703e+07	3.51445e+07	2.10651e+07	2.72979e+07	2.55981e+07	4.24838e+06	3.88299e+06	2.85037e+06	4.43517e+06	4.65197e+06	3.50399e+06	4.88311e+06	4.46299e+06	8.04627e+06	3.18974e+06	2.81123e+07	2.69667e+07	3.09509e+07
1210	59.4282	140.985	2.56953e+10	2.98198e+10	3.99514e+10	4.35746e+10	3.2236e+10	2.42183e+10	3.61328e+10	2.36021e+10	2.77952e+10	2.82631e+10	4.03194e+09	3.72322e+09	2.75774e+09	4.26171e+09	4.50019e+09	3.55224e+09	4.64588e+09	3.99201e+09	7.11806e+09	2.47389e+09	2.54844e+10	2.60575e+10	2.64238e+10
1211	59.4282	141.988	5.3844e+08	6.44519e+08	8.42897e+08	9.1201e+08	6.85258e+08	4.95906e+08	7.7684e+08	4.95316e+08	5.86524e+08	6.03075e+08	8.27328e+07	7.56983e+07	5.48991e+07	8.50136e+07	9.48531e+07	7.50234e+07	9.16283e+07	8.43174e+07	1.45853e+08	5.02221e+07	5.27768e+08	5.49795e+08	5.76698e+08
1212	59.4282	142.981	1.08243e+09	1.31136e+09	1.74339e+09	1.88275e+09	1.39216e+09	1.0536e+09	1.65557e+09	1.04427e+09	1.21705e+09	1.26231e+09	1.71093e+08	1.50576e+08	1.10933e+08	1.80665e+08	1.93454e+08	1.5254e+08	2.01018e+08	1.68522e+08	2.92428e+08	9.85781e+07	1.08526e+09	1.13052e+09	1.19221e+09
1213	59.4284	169.086	2.33498e+06	1.15584e+06	1.53334e+06	2.10496e+06	1.43242e+06	4.46394e+06	3.29589e+06	3.63102e+06	2.53087e+06	1.58029e+06	1.81483e+08	1.87718e+08	1.71069e+08	4.25348e+08	3.53358e+08	1.23992e+08	1.47727e+08	1.61519e+08	1.70895e+08	8.60733e+07	9.00304e+07	5.97707e+07	4.48412e+07
1214	59.4285	140.526	2.44024e+08	1.7767e+08	3.93502e+08	3.5129e+08	1.97431e+08	2.10296e+08	2.3069e+08	1.96561e+08	1.80122e+08	2.43311e+08	3.1665e+07	2.40061e+07	2.36443e+07	4.29686e+07	3.67348e+07	3.05562e+07	4.73586e+07	2.69837e+07	5.69888e+07	2.11564e+07	3.02972e+08	2.39632e+08	1.26923e+08
1215	59.4329	96.9589	5.93759e+08	7.10105e+08	9.5967e+08	9.89291e+08	7.5647e+08	5.65834e+08	8.99944e+08	5.78048e+08	6.41102e+08	6.60331e+08	1.21877e+08	1.06848e+08	8.83543e+07	1.25968e+08	1.32704e+08	1.07606e+08	1.37162e+08	1.19955e+08	1.91828e+08	7.60562e+07	6.34041e+08	6.20927e+08	6.38902e+08
1216	59.4329	143.984	1.85303e+07	1.55887e+07	2.0961e+07	3.30406e+07	1.70101e+07	1.99171e+07	2.49473e+07	6.85398e+06	1.86147e+07	1.70573e+07	1.87987e+06	2.90158e+06	1.70566e+06	3.435e+06	3.74572e+06	2.53612e+06	3.15019e+06	2.89595e+06	5.20304e+06	791762	2.21595e+07	1.27674e+07	2.24056e+07
1217	60.2609	282.98	3.29036e+07	3.79147e+07	6.89158e+07	7.65972e+07	4.94133e+07	2.98639e+07	6.19759e+07	2.72439e+07	3.49548e+07	4.02348e+07	0	0	0	0	377377	0	0	326268	0	0	2.32576e+07	2.89437e+07	3.21773e+07
1218	60.295	141.447	2.63402e+08	1.90693e+08	3.6882e+08	3.44702e+08	2.4945e+08	2.16434e+08	2.53673e+08	2.11191e+08	2.00489e+08	2.11914e+08	3.66774e+07	3.47309e+07	3.66724e+06	3.90041e+07	3.85245e+07	2.76221e+07	3.46243e+06	2.81573e+07	6.19174e+07	2.20864e+07	2.90897e+08	2.61294e+08	2.37016e+08
1219	60.2962	293.175	0	436342	2.67576e+06	0	1.21419e+06	0	0	1.74904e+06	984226	1.38811e+06	6.43286e+06	1.91552e+07	9.62005e+06	1.34187e+07	7.24927e+06	7.37365e+06	9.90983e+06	1.20722e+07	9.76581e+06	1.42801e+07	412896	567910	862862
1220	60.3074	80.9156	1.1163e+08	2.5126e+07	1.37903e+07	6.4899e+06	3.45268e+07	2.32655e+07	7.55192e+07	2.36316e+07	4.34439e+07	5.99478e+07	1.22672e+08	1.59195e+08	7.76888e+07	7.03368e+07	4.29044e+07	9.10968e+07	3.58857e+07	6.36677e+07	1.94335e+08	2.24079e+08	4.91288e+07	5.28797e+07	5.14883e+07
1221	60.7315	78.9176	9.34475e+07	2.17879e+07	1.37347e+07	1.36174e+07	2.45079e+07	1.87022e+07	5.93397e+07	1.80764e+07	3.68474e+07	4.30637e+07	9.58469e+07	1.2449e+08	6.11552e+07	5.53771e+07	3.12481e+07	7.02698e+07	2.83267e+07	4.6383e+07	1.51107e+08	1.76195e+08	3.90146e+07	3.91087e+07	4.12532e+07
1222	61.178	203.128	0	0	641323	0	0	0	0	0	0	0	1.17375e+07	2.77005e+07	1.28683e+07	5.98136e+06	7.47605e+06	1.44876e+07	7.00206e+06	9.44069e+06	1.82191e+07	1.05751e+07	1.17581e+06	627933	1.49674e+06
1223	61.1806	253.181	3.6897e+06	3.44158e+06	0	0	0	675015	4.01046e+06	7.71956e+06	1.30611e+06	395170	7.25803e+06	6.49833e+06	7.38258e+06	7.58654e+06	1.91237e+06	7.89368e+06	6.33505e+06	8.9247e+06	8.00863e+06	6.63719e+06	1.16904e+06	356910	3.00711e+06
1224	61.1813	773.532	0	0	0	474984	1.77805e+06	285727	0	0	8.89742e+06	8.01999e+06	6.43402e+06	9.08478e+06	3.93678e+06	2.1653e+06	1.39144e+06	5.9914e+06	3.33387e+06	8.66577e+06	4.51382e+06	2.25438e+06	980221	866765	1.82291e+06
1225	61.5735	173.081	0	0	0	0	0	0	222583	0	0	0	3.89965e+07	6.78918e+07	2.27542e+07	1.9355e+07	1.85899e+07	3.69772e+07	1.84189e+07	4.22943e+07	5.10913e+07	9.664e+06	1.04349e+07	8.87728e+06	6.74399e+06
1226	61.5955	377.246	6.18541e+07	1.1991e+07	0	0	0	2.19942e+08	9.96998e+06	1.71946e+07	911262	2.53772e+06	1.50358e+06	604565	779058	2.27854e+06	2.03295e+06	2.45083e+06	1.54588e+06	790581	823740	8.39964e+06	1.2354e+07	1.57751e+07	1.80224e+07
1227	62.0304	246.124	2.60352e+06	509077	0	0	570574	699332	251103	0	190762	1.35023e+06	872256	1.20444e+06	1.49602e+06	1.47572e+06	3.82563e+06	2.39099e+06	927574	705806	3.51427e+06	1.14503e+06	531643	0	921875
1228	62.0536	312.226	0	229965	0	0	169351	3.80699e+06	553602	2.5624e+06	0	0	5.09467e+06	5.68902e+06	7.68906e+06	1.00049e+07	9.54805e+06	6.43144e+06	3.6516e+06	3.75606e+06	9.22491e+06	9.02475e+06	303500	858585	1.90404e+06
1229	62.0561	775.549	754859	0	0	450488	4.76129e+06	0	0	223821	7.744e+06	6.01795e+06	6.66127e+06	7.22502e+06	1.94083e+06	1.40098e+06	992613	5.71359e+06	2.84597e+06	8.59987e+06	3.91064e+06	2.07348e+06	745771	1.00707e+06	4.20982e+06
1230	62.0599	201.149	1.27378e+07	0	0	0	0	0	0	202137	0	0	6.8746e+06	7.30263e+06	3.62394e+06	1.00425e+07	4.77136e+06	5.47194e+06	2.85637e+06	4.91679e+06	6.02228e+06	2.95972e+06	2.45353e+06	590667	3.01608e+06
1231	62.8456	371.281	0	0	0	0	504892	0	0	280798	3.09607e+07	5.47804e+06	1.79049e+06	8.36001e+06	1.9869e+06	810292	1.60337e+06	7.08931e+06	2.3438e+06	4.48508e+06	0	1.68761e+06	1.70543e+06	955870	2.9106e+06
1232	62.862	194.012	5.17141e+06	354866	0	0	1.28716e+06	7.581e+06	849864	2.66078e+06	4.26785e+06	1.19658e+07	295340	9.98413e+06	2.60991e+06	0	82617.8	195086	2.53806e+06	216266	80797.8	51452.6	2.46721e+06	2.16053e+06	2.14781e+06
1233	62.9051	130.094	2.75973e+07	0	0	0	1.9077e+06	8.64905e+06	6.28431e+06	1.90271e+06	0	956872	9.24211e+06	996086	1.03645e+06	3.96509e+06	2.32858e+06	5.09856e+06	4.84344e+06	5.46078e+06	7.0926e+06	1.0086e+06	1.04601e+06	1.96076e+06	880648
1234	62.9188	197.117	0	0	0	0	0	0	0	533565	0	0	1.02327e+07	1.74553e+07	1.02543e+07	1.04692e+07	8.91697e+06	8.32316e+06	5.17483e+06	7.29721e+06	1.31149e+07	5.21699e+06	479348	337379	1.94827e+06
1235	62.9317	526.165	0	0	0	0	0	0	0	0	0	0	1.23431e+07	1.49107e+06	1.42116e+07	1.35344e+07	2.25148e+06	2.83836e+06	926806	0	1.26657e+06	1.69765e+07	319346	554246	1.15455e+06
1236	62.9325	370.278	0	0	0	0	5.75902e+06	0	0	2.04067e+06	1.34545e+08	1.87919e+07	863016	3.28711e+07	8.66721e+06	0	229692	3.27703e+07	9.44558e+06	1.59682e+07	1.95489e+06	881825	9.94554e+06	9.67559e+06	1.64183e+07
1237	62.9415	747.519	6.85538e+06	4.73391e+06	3.35327e+06	9.07306e+06	2.20532e+07	3.61452e+06	9.56955e+06	2.11504e+06	5.99691e+07	6.6678e+07	1.18748e+07	2.4065e+07	9.42417e+06	7.11116e+06	5.01195e+06	1.07816e+07	6.64361e+06	1.50405e+07	5.88416e+06	2.53828e+06	1.13682e+07	1.58487e+07	1.89816e+07
1238	63.3021	223.06	2.0415e+06	0	0	0	0	2.49951e+06	250558	913692	466457	0	2.69162e+06	2.01833e+06	1.35692e+06	3.73549e+06	2.37715e+06	2.41455e+06	1.8932e+06	1.39439e+06	1.33544e+06	1.60615e+06	544014	490434	1.01686e+06
1239	63.3057	745.502	4.48107e+06	3.75246e+06	328744	1.75806e+06	3.85574e+06	569835	3.02953e+06	674127	7.25415e+06	1.15836e+07	2.2967e+06	4.19432e+06	3.07517e+06	2.12308e+06	805710	2.4411e+06	1.32278e+06	2.446e+06	2.07467e+06	841772	1.37961e+06	1.46838e+06	2.92721e+06
1240	63.3546	525.162	0	0	0	0	0	0	0	0	0	0	4.71739e+07	5.96114e+06	5.27056e+07	5.10632e+07	1.01023e+07	1.25304e+07	4.6739e+06	710000	5.90793e+06	6.21858e+07	2.2988e+06	3.44597e+06	3.90095e+06
1241	63.6972	637.459	978989	1.36525e+06	388035	0	1.27998e+06	6.70648e+06	0	5.22803e+06	6.69257e+06	5.41231e+06	6.44555e+06	1.71957e+06	3.15838e+06	2.93869e+06	5.46884e+06	5.45995e+06	5.47378e+06	5.72097e+06	2.63606e+06	2.12628e+06	3.86403e+06	4.17687e+06	5.76474e+06
1242	63.7194	511.109	327325	0	0	0	0	0	0	0	0	0	3.71942e+07	8.56712e+06	2.27752e+07	3.92112e+06	1.99296e+07	2.07499e+07	3.26341e+06	3.49665e+06	8.52718e+06	1.41363e+07	3.8407e+06	5.35929e+06	5.49363e+06
1243	63.7194	512.113	0	0	0	0	0	0	0	0	0	0	9.66808e+06	1.64151e+06	5.63759e+06	277914	4.49867e+06	5.05249e+06	479998	360795	1.29299e+06	3.10195e+06	546532	731960	239846
1244	63.7315	495.151	0	0	0	0	0	0	0	0	0	0	1.41841e+07	2.78925e+06	1.39947e+07	2.22843e+07	6.24702e+06	3.26041e+06	3.38549e+06	516565	5.49488e+06	1.94517e+07	499801	232367	0
1245	63.7364	636.457	2.04901e+07	1.01598e+07	0	5.12331e+06	1.32077e+07	2.7139e+07	3.14602e+06	2.5763e+07	2.77246e+07	2.33063e+07	2.7187e+07	5.28692e+06	1.04121e+07	9.63647e+06	2.1728e+07	2.3792e+07	2.27042e+07	2.40354e+07	1.19187e+07	7.34701e+06	1.61814e+07	1.82956e+07	2.36566e+07
1246	63.7412	635.453	5.84113e+07	2.87516e+07	6.5733e+06	1.80606e+07	2.89551e+07	6.8912e+07	1.04541e+07	6.78022e+07	6.87388e+07	5.99076e+07	6.69506e+07	1.24704e+07	2.66626e+07	2.32305e+07	5.17681e+07	5.56613e+07	5.26125e+07	5.78666e+07	2.98607e+07	1.83145e+07	4.15161e+07	4.43804e+07	5.52904e+07
1247	63.7412	748.52	2.16045e+06	2.15383e+06	760378	764785	9.04271e+06	1.08884e+06	2.57371e+06	280093	2.35846e+07	2.89562e+07	4.71797e+06	1.08587e+07	4.41124e+06	3.07707e+06	1.99157e+06	4.38875e+06	2.3782e+06	6.81562e+06	2.13603e+06	1.40148e+06	4.0667e+06	7.16867e+06	6.24148e+06
1248	63.8058	228.05	0	1.72773e+06	0	741648	3.89098e+06	0	0	6.27728e+06	1.42959e+06	177053	202648	137797	485103	183840	71645.4	3.77555e+06	1.04641e+06	3.28059e+06	3.1889e+06	1.24118e+06	2.0446e+06	2.46586e+06	2.66389e+06
1249	63.8112	608.425	2.48246e+06	0	0	0	1.44553e+06	667844	0	1.57734e+06	859635	785289	1.28153e+06	185199	129726	56751.8	439738	994078	790317	1.15911e+06	0	471579	625642	390240	660256
1250	63.8157	164.001	7.6039e+06	2.05734e+06	0	361859	1.51275e+06	7.59419e+06	2.47552e+06	2.97851e+06	5.46715e+06	4.53861e+06	2.51691e+06	5.36208e+06	3.86744e+06	4.69867e+06	2.24079e+06	2.27976e+06	3.26787e+06	2.41373e+06	4.51873e+06	2.52052e+06	3.23142e+06	3.42476e+06	3.61619e+06
1251	63.8202	621.435	1.21621e+07	6.57129e+06	1.24852e+06	2.43935e+06	6.72854e+06	1.53552e+07	527424	1.6117e+07	6.3798e+06	1.24426e+07	7.6679e+06	199941	756454	619573	4.19164e+06	6.15127e+06	5.89124e+06	6.2835e+06	952292	1.08496e+06	8.20525e+06	8.17611e+06	1.02697e+07
1252	64.1971	749.526	413901	203133	0	286572	1.63663e+06	483229	854379	0	6.85595e+06	8.07367e+06	926824	2.45869e+06	1.00939e+06	794942	634110	1.68312e+06	667701	1.80744e+06	1.38953e+06	577501	812148	586037	2.01608e+06
1253	64.5049	311.223	8.81176e+06	5.54357e+06	6.92083e+06	2.07195e+07	3.0428e+06	1.89731e+07	7.15364e+06	1.04153e+07	2.28525e+06	1.28183e+06	2.90746e+07	3.64372e+07	4.21845e+07	6.238e+07	4.7704e+07	2.66307e+07	2.33816e+07	1.9926e+07	6.18786e+07	4.91779e+07	9.35916e+06	9.27322e+06	9.05984e+06
1254	64.5782	357.265	0	0	0	0	0	0	0	0	1.00059e+07	437398	3.84552e+06	5.83105e+06	1.60609e+06	1.99407e+06	2.40643e+06	5.36925e+06	1.50676e+06	2.52146e+06	1.76938e+06	1.03485e+06	1.16773e+06	1.42352e+06	1.67982e+06
1255	64.5958	429.249	0	0	0	0	0	0	0	0	0	0	3.84067e+06	4.21131e+06	3.21412e+06	2.7384e+06	4.14465e+06	4.39466e+06	2.50788e+06	5.0087e+06	4.92126e+06	2.22802e+06	249181	474587	597019
1256	64.6068	607.421	6.19445e+06	1.87936e+06	0	470651	4.87355e+06	5.11723e+06	0	5.16918e+06	3.2917e+06	4.89246e+06	3.6212e+06	929054	655751	383416	1.42434e+06	2.6914e+06	2.49974e+06	2.8798e+06	616797	933803	3.90949e+06	3.53241e+06	3.63045e+06
1257	64.6447	344.288	0	0	0	0	0	379557	220720	0	0	0	1.82489e+06	1.04935e+06	1.24721e+06	1.05804e+06	1.40536e+06	955157	1.01182e+06	1.75411e+06	1.93693e+06	1.08331e+06	523430	345077	0
1258	64.6599	148.972	1.45513e+07	3.182e+07	3.49586e+07	6.5524e+06	2.09475e+07	9.5447e+06	4.36136e+06	2.11223e+07	2.30398e+07	1.66208e+07	1.88474e+06	875130	3.13436e+06	3.07941e+06	1.38681e+06	1.84998e+06	2.03769e+06	2.09569e+06	1.16486e+06	1.30561e+06	1.47942e+07	1.31653e+07	1.69601e+07
1259	64.6599	203.001	1.55327e+07	2.12873e+07	3.96804e+07	9.67879e+06	2.28643e+07	9.01861e+06	1.43626e+07	8.11318e+06	3.54035e+07	2.89237e+07	0	0	0	0	0	0	0	0	0	0	1.63819e+07	1.431e+07	1.45817e+07
1260	64.6599	487.092	0	4.30703e+06	8.90791e+06	646024	7.5421e+06	3.07981e+06	5.01969e+06	336745	5.86678e+06	5.75673e+06	0	0	0	0	0	0	0	0	0	0	3.06271e+06	2.79607e+06	3.91175e+06
1261	64.6917	155.107	946350	1.86458e+06	1.22248e+06	211792	1.41495e+06	2.21474e+06	1.61024e+06	2.45813e+06	1.49976e+06	2.49843e+06	8.01924e+06	1.01683e+07	8.33408e+06	1.23794e+07	1.17289e+07	1.23752e+07	9.23879e+06	9.62077e+06	1.46556e+07	8.54969e+06	2.42737e+06	3.67363e+06	3.53057e+06
1262	64.9954	221.011	1.47393e+07	5.676e+06	1.00061e+08	4.89609e+06	1.28538e+08	5.927e+07	6.39481e+07	1.94714e+08	9.348e+07	1.20324e+08	8.57128e+07	1.52256e+08	1.15726e+08	3.28612e+07	4.23564e+07	1.09619e+08	1.03853e+08	1.11284e+08	1.23669e+08	2.74843e+07	1.57843e+08	1.65939e+08	1.02649e+08
1263	65.0298	183.029	1.57777e+07	2.19527e+06	6.53933e+06	7.71047e+06	6.8608e+06	9.02611e+06	4.53034e+06	2.6861e+06	7.33578e+06	7.14846e+06	1.37963e+06	0	0	0	0	0	0	0	0	0	3.35238e+06	5.50613e+06	4.71385e+06
1264	65.4092	285.029	1.53269e+06	3.28745e+06	5.22122e+06	2.01647e+06	2.81861e+06	3.88249e+06	396160	2.924e+06	5.96449e+06	759586	0	213058	385604	468517	0	0	127422	0	363954	0	1.52705e+06	1.96245e+06	2.18462e+06
1265	65.4442	469.243	0	0	0	0	0	0	0	0	0	0	5.70621e+06	6.13761e+06	5.5015e+06	6.55949e+06	5.40257e+06	5.82659e+06	5.67319e+06	8.02672e+06	9.82482e+06	3.24265e+06	2.11775e+06	2.61072e+06	2.47557e+06
1266	65.4739	356.262	0	0	0	0	432529	0	0	0	5.71947e+07	3.62603e+06	608066	9.16616e+06	1.1917e+06	1.68827e+06	1.15905e+06	2.69784e+06	454079	2.16316e+06	757211	339318	3.62846e+06	4.33814e+06	5.01701e+06
1267	65.5142	470.247	0	0	0	0	0	0	0	0	0	0	1.34177e+06	1.3862e+06	1.19356e+06	1.42443e+06	1.19576e+06	1.0964e+06	1.07139e+06	1.75447e+06	2.29334e+06	680035	292854	528678	0
1268	65.5187	661.179	3.60673e+06	5.21392e+06	3.48998e+06	2.15451e+06	2.99734e+06	361804	4.42396e+06	744900	1.38569e+06	2.83326e+06	0	0	0	0	0	0	0	0	0	42780.8	1.29113e+06	1.16535e+06	1.85582e+06
1269	65.537	256.236	1.26082e+07	2.85614e+07	8.15211e+06	2.40507e+07	5.87266e+06	1.41772e+07	1.04862e+07	1.4082e+07	5.28481e+06	5.32623e+06	5.16588e+06	7.11584e+06	5.28386e+06	4.89175e+06	6.46514e+06	6.51399e+06	5.46238e+06	6.42435e+06	6.64945e+06	6.29935e+06	6.58524e+06	9.08349e+06	1.18763e+07
1270	65.5635	870.703	220280	0	0	0	844195	1.95145e+06	0	678346	362114	422950	735259	1.13745e+06	411341	132192	123558	1.09848e+06	515257	1.06156e+06	720459	773119	0	401256	887191
1271	65.5643	415.234	0	0	0	0	0	0	0	2.14459e+07	539516	0	4.19414e+06	1.04552e+07	5.36188e+06	9.12089e+06	6.9469e+06	4.59462e+06	2.76598e+06	4.2046e+06	6.66773e+06	2.02406e+06	2.77677e+06	2.02932e+06	2.15776e+06
1272	65.5697	719.487	1.36998e+06	273168	0	3.4347e+06	2.14343e+06	0	598487	0	7.20625e+06	1.30355e+07	1.0805e+06	6.6076e+06	827146	225119	311015	536132	349234	318962	66912.7	91908.1	2.07417e+06	1.94445e+06	2.09643e+06
1273	65.578	201.112	0	0	0	670277	0	569521	185242	394373	413392	0	8.02736e+06	1.02745e+07	4.27084e+06	1.58067e+07	1.41348e+07	5.76339e+06	7.43772e+06	5.33782e+06	1.06274e+07	8.24592e+06	3.5496e+06	3.84977e+06	4.1013e+06
1274	65.578	416.237	0	0	0	0	170166	0	0	0	0	0	502240	1.75927e+06	1.13967e+06	1.913e+06	1.08809e+06	461284	569412	1.01761e+06	2.00153e+06	424178	0	210527	245075
1275	65.879	124.039	4.45551e+06	5.63869e+06	5.70373e+06	1.38056e+06	2.99672e+06	2.51158e+07	3.83641e+06	1.25055e+07	1.20064e+07	1.31671e+07	1.77175e+06	2.66852e+06	4.47022e+06	2.15629e+06	7.4267e+06	5.22978e+06	4.32465e+06	3.05761e+06	2.90879e+07	1.07029e+07	6.54422e+06	8.39184e+06	8.35271e+06
1276	66.2185	158.053	1.53724e+06	0	0	0	0	7.35038e+07	147234	0	0	746813	722767	1.61339e+06	395277	117489	315915	1.72042e+06	342403	926450	247425	280048	4.26319e+06	4.81637e+06	3.67885e+06
1277	66.2185	219.05	3.55193e+06	1.29673e+06	3.32353e+06	0	201715	1.14355e+06	0	1.48967e+06	919613	451363	445092	778131	322185	146447	2.254e+06	3.63191e+06	677855	1.19825e+06	1.39665e+06	311370	1.27974e+06	1.44373e+06	948210
1278	66.2477	255.232	8.43192e+07	1.67753e+08	8.60726e+07	1.22542e+08	3.06265e+07	9.61521e+07	6.73286e+07	8.38307e+07	3.06731e+07	3.14499e+07	3.56615e+07	4.38263e+07	3.38419e+07	3.47211e+07	4.4162e+07	6.3889e+07	4.00609e+07	4.39092e+07	4.23287e+07	4.26519e+07	7.41189e+07	6.18443e+07	8.18707e+07
1279	66.2845	284.267	9.74696e+06	1.2373e+07	8.6771e+06	1.50513e+07	3.57828e+06	1.27294e+07	7.18438e+06	4.76528e+06	3.70659e+06	3.98181e+06	3.24483e+06	4.62945e+06	3.26904e+06	2.25913e+06	5.65087e+06	6.64766e+06	2.84363e+06	4.09864e+06	3.83148e+06	2.77163e+06	3.84259e+06	4.93742e+06	6.97105e+06
1280	66.3294	212.023	1.81495e+06	0	588414	0	7.93735e+06	1.65227e+06	0	0	2.47543e+07	1.9684e+07	0	200390	323867	0	0	0	225442	0	0	55748.8	3.46933e+06	2.90529e+06	3.03389e+06
1281	66.4018	283.264	5.49967e+07	6.53895e+07	6.3445e+07	8.30454e+07	2.13522e+07	6.81962e+07	5.29675e+07	3.55342e+07	2.01687e+07	2.36324e+07	1.9464e+07	3.01184e+07	1.7379e+07	1.29898e+07	2.25722e+07	3.91944e+07	2.53374e+07	2.53988e+07	4.41685e+07	1.66006e+07	3.69927e+07	5.09309e+07	4.23022e+07
1282	66.4222	687.423	1.19814e+06	2.18346e+06	648179	3.46758e+06	2.26343e+06	1.5604e+06	1.62686e+06	4.03091e+06	0	944247	252147	47723.1	0	45412	0	50018.7	0	267041	0	33217	1.0822e+06	757085	1.05073e+06
1283	66.4427	191.107	216783	0	0	0	142806	306808	153253	0	0	425194	3.07371e+06	6.25162e+06	5.7606e+06	3.70406e+06	3.05476e+06	2.37454e+06	2.70878e+06	2.84706e+06	5.51701e+06	6.7194e+06	1.13332e+06	1.10022e+06	841811
1284	66.4618	318.07	0	0	0	0	0	0	0	0	0	0	1.69003e+06	3.98196e+06	1.78751e+06	1.72032e+06	6.22133e+06	2.12852e+06	776119	703776	1.34129e+06	1.55268e+06	176235	563290	302820
1285	66.4652	200.01	1.99431e+07	7.06044e+06	1.31004e+07	3.82991e+06	2.95243e+06	2.49375e+06	7.55749e+06	2.6723e+06	6.50884e+06	1.31996e+06	8.12334e+06	683986	722874	869060	7.35094e+06	3.35623e+06	1.47521e+07	4.49245e+06	0	257035	3.18697e+06	2.04509e+06	2.59084e+06
1286	66.4731	721.501	0	8.15386e+06	333081	3.57989e+06	2.49852e+06	323023	3.91093e+06	183682	2.39585e+06	4.49658e+06	999951	460801	268973	247783	52704.9	1.16323e+06	236654	535208	1.00546e+06	114962	1.83832e+06	2.06373e+06	2.04824e+06
1287	66.8505	201.002	1.20496e+06	3.39237e+06	5.48319e+06	1.30045e+06	373421	589264	0	1.0096e+06	2.45905e+06	509434	0	0	0	0	0	0	0	0	0	0	1.19569e+06	1.01295e+06	1.02471e+06
1288	67.1282	253.108	230174	0	0	0	0	0	0	0	0	0	5.37323e+06	6.46423e+06	4.83485e+06	2.96935e+06	2.73735e+06	3.29241e+06	2.39259e+06	4.16847e+06	5.04916e+06	5.57401e+06	1.09462e+06	844232	675734
1289	67.1848	176.985	5.85461e+06	1.7111e+07	2.695e+07	7.94717e+06	1.07421e+07	1.94064e+07	1.41028e+07	8.59723e+06	2.13043e+07	4.98364e+06	109919	0	456425	0	0	203519	0	748216	1.67393e+06	1.18963e+06	9.4122e+06	9.7231e+06	9.45039e+06
1290	67.1848	516.196	3.42548e+06	1.32058e+06	800814	1.2055e+06	2.72879e+06	1.76943e+06	1.7256e+06	767253	328166	974982	4.14727e+06	2.15217e+06	2.86478e+06	7.34456e+06	5.12554e+06	4.2361e+06	7.55809e+06	2.74837e+06	3.24357e+06	2.88727e+06	2.64209e+06	3.29785e+06	3.37862e+06
1291	67.1987	617.187	4.21265e+06	822234	3.15666e+06	199424	3.44007e+06	4.07034e+06	2.67165e+06	2.00903e+06	160795	2.89102e+06	42894.8	0	0	0	0	0	0	0	0	0	1.03172e+06	1.36761e+06	1.57481e+06
1292	67.2789	129.018	0	4.74721e+07	5.5539e+07	5.12556e+07	6.4548e+07	2.63423e+07	0	6.85556e+07	5.5942e+07	4.652e+07	6.99616e+07	9.15047e+07	6.81496e+07	4.46826e+07	4.46565e+07	9.91105e+07	3.48318e+07	4.80439e+07	8.073e+07	8.53187e+07	5.59305e+07	5.87154e+07	5.14921e+07
1293	67.2789	199.006	3.53224e+07	9.7216e+07	1.89225e+08	6.1436e+07	5.60845e+07	3.75618e+07	4.38141e+07	4.07805e+07	8.53406e+07	2.56902e+07	0	0	0	0	0	0	0	0	0	0	4.58732e+07	4.69688e+07	4.48302e+07
1294	67.2903	325.056	3.99066e+06	3.26063e+06	3.70346e+06	2.87667e+06	1.87741e+06	2.71012e+06	3.19857e+06	1.67242e+06	4.33422e+06	3.08113e+06	0	0	235498	555680	1.60164e+06	0	0	0	0	255171	1.80334e+06	2.73003e+06	1.94211e+06
1295	67.2926	301.238	214267	1.72099e+06	254252	736482	707662	1.59764e+06	1.10281e+06	2.38645e+06	3.62275e+06	1.43685e+06	756246	508047	517361	603750	463748	548794	733135	408964	841889	220760	940958	1.63816e+06	669151
1296	67.3727	465.14	0	143232	0	0	0	0	0	0	0	0	1.16777e+06	316043	1.27193e+06	2.20883e+06	531922	110314	704639	46005.6	392456	1.62762e+06	0	166593	142373
1297	67.5567	205.053	1.89642e+06	3.04209e+07	1.37043e+07	6.06966e+07	3.11537e+07	0	5.31561e+07	0	1.43101e+07	3.25127e+07	108262	201818	56092.4	115712	376216	89084.2	85336.4	0	0	0	1.15281e+07	1.18124e+07	1.01196e+07
1298	67.841	135.944	1.427e+07	8.21545e+07	2.20684e+07	7.78426e+07	4.42433e+07	4.60035e+07	3.70746e+07	2.14648e+07	1.61276e+07	4.80404e+07	4.52584e+07	3.61898e+07	3.98546e+07	1.74267e+07	3.56796e+07	3.62087e+07	3.76692e+07	3.65375e+07	3.50614e+07	3.80344e+07	1.84944e+07	7.78924e+07	4.01445e+07
1299	68.0288	323.044	4.23201e+06	1.7318e+06	3.0961e+06	2.93864e+06	2.7042e+06	372769	2.15062e+06	231107	1.91734e+06	2.76181e+06	0	0	0	0	0	0	0	0	0	0	1.11487e+06	1.22814e+06	627575
1300	68.0331	189.112	643230	759553	1.4815e+06	530283	850849	2.12019e+06	216267	1.05778e+06	772373	438655	1.35644e+07	3.54327e+07	1.40248e+07	8.57234e+06	9.16562e+06	1.72425e+07	7.28402e+06	1.27655e+07	3.14598e+07	1.65071e+07	8.22708e+06	7.12132e+06	1.04028e+07
1301	68.0576	411.129	6.29573e+06	5.25344e+06	3.55319e+07	7.33119e+06	1.3139e+07	1.352e+07	1.10281e+07	1.63996e+07	1.17587e+07	2.4002e+07	0	0	0	0	0	0	0	0	0	0	1.07368e+07	1.13355e+07	1.02574e+07
1302	68.145	343.25	311910	127936	233335	0	5.02852e+06	4.99263e+06	4.19376e+06	3.25184e+06	1.80714e+08	1.12181e+07	376460	2.66262e+07	2.52839e+06	1.51524e+06	0	9.46873e+06	2.48734e+06	3.15525e+06	458757	1.83561e+06	1.6246e+07	1.70479e+07	1.65928e+07
1303	68.1812	217.034	1.44312e+07	5.53877e+07	3.96965e+07	2.20662e+07	1.72804e+07	2.22048e+07	1.2117e+07	1.58547e+07	5.08636e+07	9.55486e+06	90271	4.65501e+06	2.00882e+06	952661	6.65237e+06	2.31709e+07	1.05058e+06	818635	1.14617e+07	718562	1.8213e+07	1.82887e+07	2.09686e+07
1304	68.2031	397.223	0	0	0	0	0	0	0	0	0	0	5.62677e+06	5.41849e+06	3.77239e+06	9.26433e+06	8.08469e+06	6.01097e+06	6.26141e+06	4.19639e+06	5.28224e+06	3.97792e+06	2.0682e+06	2.18772e+06	2.22846e+06
1305	68.2361	342.247	0	0	1.67082e+06	0	2.57117e+07	0	1.38753e+06	1.02389e+07	8.99906e+08	5.52856e+07	955162	1.22746e+08	1.62939e+07	843687	77156.1	4.6688e+07	1.72125e+07	2.27342e+07	2.5684e+06	2.58811e+06	7.28413e+07	7.08532e+07	7.55629e+07
1306	68.4975	760.594	1.66076e+06	0	0	502413	3.04416e+06	1.41525e+06	0	1.96694e+06	1.59958e+06	2.12918e+06	550725	1.42132e+06	488569	0	101457	1.57923e+06	320812	1.12402e+06	591697	693499	1.56635e+06	1.58039e+06	760519
1307	68.5605	546.206	0	0	0	0	144040	0	0	0	0	0	547911	470560	629151	1.57366e+06	837076	629610	1.36398e+06	434197	403213	834459	367254	296144	0
1308	68.5868	119.975	2.12397e+06	0	1.06934e+06	2.42233e+06	2.30389e+06	2.57797e+06	3.27669e+06	2.19893e+06	2.74963e+06	4.82966e+06	1.01073e+06	3.24905e+06	2.08439e+06	77693.3	948568	3.67659e+06	2.11538e+06	5.31177e+06	2.60541e+06	2.32165e+06	2.52534e+06	3.49408e+06	2.07703e+06
1309	68.796	188.137	0	0	0	122444	0	0	0	399583	112233	0	1.94662e+06	5.3449e+06	2.66923e+06	1.44537e+06	1.35642e+06	2.68722e+06	1.12745e+06	2.19571e+06	4.76009e+06	2.20578e+06	1.1373e+06	635221	680956
1310	68.9842	156.97	1.9717e+07	8.6178e+06	1.77917e+07	5.15922e+06	1.162e+07	5.47732e+08	7.23098e+06	6.95636e+06	8.29133e+06	6.5659e+06	1.49411e+07	2.54765e+07	9.00763e+06	1.4839e+06	1.18338e+07	2.37729e+07	5.24132e+06	1.73278e+07	1.3901e+07	9.00433e+06	4.16443e+07	4.69755e+07	2.9726e+07
1311	69.0221	244.09	3.47966e+06	0	280643	995724	1.32078e+06	1.53437e+06	298721	1.71517e+06	179028	1.93777e+06	941330	868678	1.69496e+06	1.36938e+06	1.95297e+06	854571	1.88971e+06	813086	1.13989e+06	4.42176e+06	1.2203e+06	1.79542e+06	1.40176e+06
1312	69.0453	93.0334	8.65717e+06	5.07438e+06	4.99841e+06	2.45051e+06	3.76779e+06	3.1563e+06	4.42414e+06	7.17131e+06	3.67431e+06	4.76842e+06	2.1535e+06	2.89023e+06	2.29602e+06	3.01521e+06	3.8409e+06	2.21344e+06	3.35527e+06	3.27132e+06	3.9821e+06	3.4181e+06	4.85685e+06	4.43521e+06	4.40998e+06
1313	69.0678	179.055	972650	5.88249e+06	0	1.12668e+07	1.33399e+07	1.95776e+06	868012	2.05395e+07	0	0	677251	3.71187e+06	268648	1.31317e+06	662869	556697	130313	292345	642684	6.97414e+06	1.32065e+06	976885	1.71855e+06
1314	69.0863	309.206	3.88754e+06	7.90914e+06	3.12285e+06	5.84714e+06	4.93406e+06	1.35679e+07	7.84056e+06	1.51007e+07	1.72791e+06	1.62915e+06	8.57245e+06	1.40302e+07	1.44254e+07	2.25403e+07	1.77285e+07	1.14355e+07	1.06593e+07	8.46421e+06	2.03656e+07	2.35572e+07	9.27354e+06	8.39574e+06	1.48208e+07
1315	69.087	493.135	0	134784	415430	0	1.21101e+06	0	466550	0	0	455116	4.52843e+06	937443	4.74499e+06	3.67186e+06	1.76801e+06	1.95907e+06	2.63575e+06	1.52629e+06	2.12391e+06	6.53261e+06	1.53589e+06	1.48486e+06	1.13691e+06
1316	69.1167	263.077	1.76475e+07	975612	5.32035e+06	1.23533e+06	2.10609e+06	4.98942e+06	5.32888e+06	809092	543209	714842	8.91035e+06	2.37516e+06	2.49816e+06	5.91375e+06	6.94304e+06	9.31739e+06	1.01224e+07	5.75526e+06	1.75312e+07	9.46563e+06	7.60643e+06	7.78624e+06	806612
1317	69.1272	196.069	1.72452e+07	6.22654e+06	7.43348e+06	5.52003e+06	6.42697e+06	8.08439e+06	1.66704e+06	7.67856e+06	3.58743e+06	9.77336e+06	3.82565e+06	3.9127e+06	6.81956e+06	6.00023e+06	6.71052e+06	3.57473e+06	8.01932e+06	2.65265e+06	4.25023e+06	1.70494e+07	8.91296e+06	8.20151e+06	7.78481e+06
1318	69.1272	213.076	2.69819e+07	1.187e+07	1.30077e+07	8.41839e+06	1.05998e+07	1.63707e+07	1.21433e+07	8.65929e+06	5.00952e+06	6.29649e+06	6.83678e+06	7.13305e+06	1.1963e+07	1.37696e+07	9.03748e+06	7.52248e+06	1.2749e+07	9.19759e+06	1.1688e+07	1.35613e+07	1.42554e+07	1.32665e+07	1.25293e+07
1319	69.1436	180.042	1.57874e+07	4.30241e+06	6.15604e+06	4.63381e+06	4.35174e+06	6.49718e+06	5.47719e+06	6.28511e+06	2.27041e+06	7.3173e+06	2.61325e+06	3.15141e+06	5.70903e+06	5.37514e+06	6.77208e+06	3.28265e+06	6.89477e+06	2.73889e+06	3.9503e+06	1.51411e+07	6.72793e+06	7.23449e+06	7.29167e+06
1320	69.3305	195.065	1.54164e+08	5.46868e+07	8.41067e+07	6.14598e+07	6.88461e+07	5.90693e+07	6.9829e+07	7.8352e+07	2.2119e+07	8.91736e+07	3.79263e+07	3.94712e+07	7.00675e+07	6.0014e+07	7.38602e+07	3.72077e+07	7.51852e+07	3.30797e+07	4.59418e+07	1.60881e+08	8.24557e+07	7.95036e+07	7.73834e+07
1321	69.4308	179.034	1.31838e+07	873497	4.11547e+06	1.54536e+06	898007	4.86772e+06	2.95946e+06	0	5.64952e+06	1.09593e+07	2.94795e+06	6.82471e+06	3.45109e+06	2.32332e+06	3.77319e+06	2.77228e+06	4.01109e+06	1.98237e+06	2.74702e+06	4.3595e+06	3.32504e+06	4.06878e+06	4.44708e+06
1322	69.5172	122.036	4.9979e+06	1.73652e+06	1.46999e+06	1.57521e+06	1.58677e+06	3.17735e+06	2.08861e+06	1.26736e+06	738908	926407	927046	1.1421e+06	1.69884e+06	2.50923e+06	1.82497e+06	1.27785e+06	2.42387e+06	1.19176e+06	1.6338e+06	2.0367e+06	1.98444e+06	1.83312e+06	1.83097e+06
1323	69.5172	137.023	5.56166e+07	2.07546e+07	7.45737e+07	4.92967e+07	2.83108e+07	2.49379e+07	2.91069e+07	5.87763e+07	4.15222e+07	3.8721e+07	3.32902e+07	5.90243e+07	1.89315e+07	2.04778e+07	4.01667e+07	5.45647e+07	4.58477e+07	5.61748e+07	6.96753e+07	5.69655e+07	4.69225e+07	4.89525e+07	4.09952e+07
1324	69.5554	150.031	5.69798e+07	2.3566e+07	2.40666e+07	1.80341e+07	2.06864e+07	3.3649e+07	2.50766e+07	1.93383e+07	8.25138e+06	1.10592e+07	1.20318e+07	1.18772e+07	1.98229e+07	2.6882e+07	1.87129e+07	1.41479e+07	2.60282e+07	1.46606e+07	1.93651e+07	2.39388e+07	2.51843e+07	2.58239e+07	2.37491e+07
1325	69.5935	164.034	653824	544274	1.81133e+06	649746	2.28438e+06	7.89967e+06	180039	1.27816e+06	5.52462e+06	4.8272e+06	580400	1.418e+06	1.21039e+06	1.72543e+06	1.75316e+06	2.13769e+06	1.6444e+06	1.11894e+06	1.27353e+06	1.52943e+06	293375	1.54082e+06	770834
1326	69.6564	166.058	2.15857e+07	1.00621e+07	9.87497e+06	7.50669e+06	8.22775e+06	1.41093e+07	1.03009e+07	7.93447e+06	1.38791e+06	5.63995e+06	4.9107e+06	5.23933e+06	8.1379e+06	1.0372e+07	7.99484e+06	5.81172e+06	9.6083e+06	6.17433e+06	8.54099e+06	8.88979e+06	1.07895e+07	1.06149e+07	9.9545e+06
1327	69.6852	148.068	1.46914e+08	0	0	148017	0	4.15127e+07	4.38383e+07	0	0	0	0	0	0	0	0	0	0	0	0	0	1.27124e+07	1.05837e+07	1.48848e+07
1328	69.7362	83.0126	0	737619	698227	404638	1.272e+06	1.48919e+06	554325	3.32161e+06	1.33236e+06	4.02676e+06	901068	477790	736463	732124	1.43458e+06	2.71011e+06	791851	1.27956e+06	1.40695e+06	527112	1.29887e+06	1.25733e+06	1.63964e+06
1329	69.7865	183.102	0	734230	0	0	0	0	1.4326e+06	0	0	0	1.5617e+07	2.31863e+07	1.7147e+07	2.62741e+07	2.49389e+07	1.50151e+07	1.36487e+07	1.6163e+07	2.08241e+07	1.16371e+07	6.03198e+06	5.90047e+06	6.01655e+06
1330	69.8791	144.065	0	970210	0	0	212715	1.43239e+06	0	824892	0	361646	976564	6.83629e+06	417923	503722	1.22755e+06	792664	1.19608e+06	1.18518e+06	281997	739635	243894	562341	228594
1331	69.9154	126.038	3.77887e+07	6.22098e+06	3.02738e+06	3.03939e+06	1.35972e+06	2.76346e+06	9.6137e+06	396914	1.69685e+06	2.61296e+06	697649	495089	383730	0	0	580155	305491	100903	268771	225204	7.15561e+06	7.15024e+06	7.33575e+06
1332	69.9366	331.118	827519	898763	2.42332e+06	558770	1.55053e+06	2.60126e+06	511367	1.84821e+06	484422	2.08683e+06	706029	835777	197045	765480	1.25692e+06	625893	200640	543589	1.01748e+06	426102	360102	691696	336521
1333	69.955	256.997	0	284162	2.53843e+06	1.74918e+06	1.9449e+06	0	242745	0	1.5364e+06	1.08393e+06	0	0	0	0	0	0	0	0	0	0	542959	146982	331774
1334	69.957	116.042	2.91903e+08	6.53652e+06	199841	5.73777e+06	0	4.3659e+07	4.46812e+07	1.21677e+06	438773	535990	220711	777981	316623	92086.1	184906	317835	199533	138219	320302	374281	1.56728e+07	1.55319e+07	6.53945e+06
1335	69.9708	559.384	0	0	0	0	0	0	0	0	0	0	2.60574e+06	2.72616e+06	3.27656e+06	1.81472e+06	1.54773e+06	2.99154e+06	1.17704e+06	3.24206e+06	7.30211e+06	1.8233e+06	1.0533e+06	897495	865221
1336	69.9886	300.262	0	268625	175598	461650	579116	1.54028e+06	482229	2.5127e+06	0	380728	2.13653e+06	3.94328e+06	1.33404e+06	2.11071e+06	2.20598e+06	2.18641e+06	1.58447e+06	2.04716e+06	1.51016e+06	1.19732e+06	1.18514e+06	1.00249e+06	910668
1337	70.0049	141.091	0	0	0	0	0	0	0	0	0	0	4.61389e+07	1.89807e+07	2.42085e+07	6.48084e+07	4.61354e+07	3.4256e+07	4.72008e+07	3.65179e+07	5.12057e+07	2.98528e+07	1.23121e+07	1.42674e+07	1.09847e+07
1338	70.254	355.248	0	0	0	0	0	0	0	0	0	0	3.14288e+06	3.32601e+06	3.67767e+06	9.23014e+06	8.84803e+06	5.19021e+06	3.40777e+06	3.53989e+06	4.5525e+06	5.20488e+06	2.14665e+06	2.05561e+06	2.12536e+06
1339	70.4315	447.347	0	1.36346e+06	1.22303e+06	3.37704e+06	726625	1.05778e+06	1.4205e+06	1.32705e+06	1.74624e+06	163150	403519	356351	292084	219929	214051	334530	349386	378574	449052	309650	847162	443560	622396
1340	70.4433	407.134	519923	2.11883e+06	1.68754e+06	2.317e+06	1.72613e+06	1.36243e+06	274999	345786	833233	938967	1.87306e+06	990835	1.39882e+06	2.08424e+06	1.58682e+06	1.26165e+06	2.21686e+06	1.17095e+06	1.04538e+06	1.74434e+06	1.24004e+06	1.27586e+06	1.21401e+06
1341	70.5459	147.065	2.1775e+09	0	5.55863e+06	1.54949e+07	0	7.05767e+08	6.78864e+08	0	0	0	2.30689e+06	740398	412650	251950	0	669873	883759	1.63709e+06	369620	154879	1.38722e+08	2.01585e+08	1.51928e+08
1342	70.6322	247.028	2.83523e+06	4.47075e+06	3.02336e+06	3.59671e+06	3.06081e+06	6.56463e+06	1.81482e+06	3.50508e+06	4.89047e+06	1.19158e+06	0	0	0	0	0	0	0	0	0	0	1.2569e+06	3.26117e+06	2.1388e+06
1343	70.6449	109.028	4.45411e+07	1.41817e+07	7.00305e+07	9.58219e+06	8.67773e+06	1.76116e+07	1.12562e+07	4.63078e+07	1.35354e+07	2.26807e+07	1.48553e+06	4.16062e+06	1.70158e+06	2.04094e+06	1.13533e+07	2.52453e+06	3.2391e+06	4.54957e+06	4.34965e+06	3.73865e+06	2.21301e+07	2.14826e+07	2.21104e+07
1344	70.7178	139.112	0	0	0	0	0	0	0	0	0	0	2.53479e+06	4.42732e+06	2.94487e+06	4.76848e+06	4.61928e+06	1.71791e+06	1.52711e+06	2.79714e+06	4.33658e+06	996420	205960	1.0149e+06	618698
1345	70.728	154.021	3.80262e+07	1.16756e+07	6.54476e+07	7.97501e+06	7.32089e+06	1.49769e+07	9.09581e+06	4.0228e+07	1.07508e+07	2.04033e+07	3.32964e+06	2.26294e+06	1.31386e+06	856850	7.17852e+06	2.95131e+06	1.34359e+06	2.43721e+06	1.23364e+06	2.82637e+06	1.67654e+07	1.77222e+07	1.92041e+07
1346	70.832	108.02	3.64872e+07	1.04684e+07	5.68994e+07	6.99424e+06	6.8131e+06	1.49936e+07	9.05452e+06	3.73142e+07	1.00364e+07	1.84546e+07	975847	1.82921e+06	1.02352e+06	1.37351e+06	7.96632e+06	1.03064e+06	2.43689e+06	1.5104e+06	2.98076e+06	1.93893e+06	1.67576e+07	1.66622e+07	1.71974e+07
1347	70.832	159.065	445376	1.18107e+06	5.48078e+06	0	574098	7.19206e+06	735034	1.04376e+06	766327	4.72936e+06	3.46898e+06	1.8585e+06	1.95266e+06	3.29839e+06	3.73062e+06	2.65408e+06	1.41963e+06	3.371e+06	2.29471e+06	2.41145e+06	3.02605e+06	3.17226e+06	1.37916e+06
1348	70.9106	105.018	0	355088	0	769151	540187	0	0	419555	160017	395513	484676	525610	1.15135e+06	1.1625e+06	1.41285e+06	604309	703627	679403	1.37069e+06	1.1873e+06	107201	376452	0
1349	70.9177	243.196	0	9.32599e+06	1.75557e+06	4.00629e+06	2.15301e+06	5.64186e+06	1.01022e+07	8.19552e+06	1.52544e+06	786559	3.45231e+06	3.93176e+06	2.70331e+06	4.77022e+06	4.99224e+06	3.57016e+06	4.06383e+06	3.23593e+06	5.87053e+06	4.36944e+06	3.75342e+06	4.31042e+06	3.86244e+06
1350	70.9177	299.259	3.61386e+06	6.33936e+06	4.02812e+06	7.81646e+06	5.55358e+06	1.70136e+07	6.37173e+06	1.1762e+07	4.37587e+06	5.61479e+06	1.30485e+07	2.80495e+07	9.28734e+06	1.26213e+07	1.23513e+07	1.25972e+07	1.08442e+07	1.27325e+07	1.29769e+07	9.1298e+06	8.07993e+06	8.9455e+06	8.33761e+06
1351	71.05	592.174	804509	122824	2.90595e+06	233648	1.88503e+06	2.73481e+06	4.21728e+06	1.0178e+06	314575	1.9898e+06	0	162124	377836	247712	380043	72185.3	0	0	107036	0	1.29597e+06	1.42942e+06	892159
1352	71.0733	490.284	0	0	0	0	2.37076e+06	0	0	1.2994e+06	5.93261e+07	6.24435e+06	0	3.90686e+06	342361	0	0	1.06687e+06	339990	422824	0	0	3.71227e+06	4.3661e+06	3.52864e+06
1353	71.0965	344.122	0	0	0	0	0	0	0	0	0	0	1.78958e+06	2.28075e+07	1.05574e+06	2.1578e+06	5.78984e+06	1.18163e+06	2.10479e+06	1.29892e+07	1.15824e+06	433009	2.99892e+06	2.68906e+06	1.36309e+06
1354	71.1111	245.012	1.91597e+07	2.12614e+07	4.51243e+07	1.32523e+07	1.8344e+07	1.44263e+07	1.84706e+07	8.78033e+06	2.23618e+07	8.62713e+06	0	0	0	0	0	0	0	0	0	0	1.39027e+07	1.34657e+07	1.36411e+07
1355	71.2696	380.219	1.0463e+07	8.44399e+06	5.8732e+06	1.44251e+07	1.19737e+07	1.75002e+07	8.2286e+06	3.46855e+07	347607	257729	421141	6.88933e+06	4.8326e+06	4.5287e+06	407762	287261	477151	293571	4.33858e+06	4.56885e+06	9.74566e+06	9.00803e+06	9.02811e+06
1356	71.3295	323.185	5.96156e+06	5.11568e+06	3.22513e+06	4.20956e+06	7.71486e+06	1.01928e+07	3.89853e+06	1.76166e+07	361382	97910.4	3.39787e+06	5.06602e+06	5.94644e+06	1.31857e+07	6.92925e+06	4.32828e+06	6.19918e+06	7.35888e+06	1.39117e+07	6.43633e+06	4.76885e+06	4.77415e+06	5.01734e+06
1357	71.4535	152.499	0	558921	4.24337e+06	155969	142710	1.48836e+06	182010	4.37445e+06	541322	1.17239e+06	0	0	0	0	577243	0	0	0	0	0	771387	1.6495e+06	641480
1358	71.4902	255.05	1.52938e+07	1.70843e+07	1.21312e+07	2.17468e+07	1.05023e+07	1.25143e+07	1.28318e+07	3.98544e+06	2.18e+07	5.3611e+06	3.16202e+06	2.58756e+06	2.45742e+06	3.87504e+06	1.74432e+06	2.37302e+06	2.54771e+06	1.92143e+06	3.35496e+06	4.74575e+06	1.0106e+06	9.86668e+06	9.78425e+06
1359	71.5022	315.253	461815	3.17194e+06	2.17633e+06	4.82528e+06	2.18365e+06	4.40395e+06	4.25723e+06	4.17005e+06	674990	790323	1.80906e+07	1.6466e+07	1.90609e+07	1.39318e+07	1.27688e+07	1.39435e+07	1.26586e+07	1.59311e+07	3.09209e+07	2.52888e+07	9.73378e+06	9.86632e+06	9.17484e+06
1360	71.5066	188.951	433858	1.77396e+06	1.20428e+06	2.86656e+06	2.12631e+06	3.10755e+06	2.36103e+06	4.49883e+06	2.27417e+06	3.40023e+06	4.00517e+06	2.78578e+06	3.44348e+06	3.26997e+06	3.65647e+06	3.83363e+06	4.38665e+06	3.8086e+06	3.29276e+06	3.52631e+06	2.95092e+06	2.98679e+06	3.16129e+06
1361	71.5205	383.279	0	119048	0	0	0	107427	0	0	0	0	1.29487e+06	2.85205e+06	1.40098e+06	1.64256e+06	425482	367118	891933	892167	2.15743e+06	3.00188e+06	383768	283844	570872
1362	71.5995	190.948	0	1.38834e+06	240790	1.52573e+06	1.1995e+06	1.56688e+06	370893	2.65083e+06	1.41684e+06	1.85483e+06	2.34754e+06	1.68086e+06	2.28925e+06	1.9746e+06	2.55661e+06	3.10644e+06	2.9144e+06	2.39974e+06	2.33617e+06	2.49269e+06	1.15208e+06	2.165e+06	1.94139e+06
1363	71.65	199.978	5.9048e+07	2.26144e+06	6.72374e+06	863139	1.22445e+06	1.34719e+06	1.09135e+07	3.57589e+06	889437	726449	1.16025e+06	360056	0	0	1.93067e+06	604207	1.39468e+06	626999	0	0	3.63894e+06	4.12085e+06	4.47782e+06
1364	71.6917	289.038	7.04995e+06	2.41763e+07	4.04484e+07	1.23154e+07	9.93457e+06	1.21538e+07	7.08414e+06	1.11949e+07	4.82205e+07	1.50966e+07	0	0	0	0	0	0	0	0	0	0	1.48109e+07	9.8674e+06	1.24818e+07
1365	71.6981	161.044	8.67677e+06	1.29445e+07	1.54893e+07	1.67621e+07	2.94873e+07	3.14736e+07	1.2844e+07	1.69523e+07	1.74718e+07	3.64558e+07	9.77639e+06	9.71156e+06	9.99473e+06	1.64806e+07	1.9058e+07	1.47942e+07	9.03391e+06	9.09896e+06	1.95508e+07	1.42455e+07	1.41004e+07	1.25346e+07	1.90739e+07
1366	71.6983	403.27	0	2.26442e+06	668614	2.04018e+06	415623	795871	906568	2.42867e+06	236936	765906	0	0	0	0	0	0	0	0	0	0	237892	256809	161376
1367	71.7193	75.0075	1.36277e+06	5.31024e+06	3.45615e+06	9.3066e+06	5.3452e+06	4.52449e+06	2.48485e+06	6.99878e+06	3.35085e+06	5.00254e+06	4.00881e+06	3.17796e+06	8.21008e+06	7.08993e+06	1.06407e+07	4.24757e+06	6.28973e+06	4.92887e+06	6.94228e+06	9.30261e+06	4.42533e+06	5.13052e+06	3.952e+06
1368	71.7305	155.001	7.33128e+06	7.7067e+06	6.42726e+06	6.70626e+06	7.07847e+06	8.66138e+06	6.41953e+06	7.97028e+06	7.28107e+06	7.98948e+06	2.20866e+06	2.71201e+06	1.47499e+07	655122	981243	7.74964e+06	1.16223e+07	5.5295e+06	2.1149e+06	6.24187e+06	7.59158e+06	6.4085e+06	6.94072e+06
1369	71.7622	557.368	0	0	0	0	0	0	0	0	0	0	1.02288e+06	953257	1.32879e+06	1.79798e+06	1.83304e+06	912004	1.24054e+06	1.1969e+06	2.99234e+06	1.60475e+06	144041	142437	264480
1370	72.0025	223.097	491889	770730	355600	575809	1.36636e+06	1.38393e+06	1.68527e+06	0	987801	660044	2.56622e+06	4.04706e+06	2.64008e+06	3.72095e+06	3.25656e+06	3.14182e+06	1.04906e+06	1.48503e+06	4.53575e+06	3.12712e+06	832374	1.10526e+06	634609
1371	72.0676	237.061	213509	6.85398e+06	5.39493e+06	1.08954e+07	1.00941e+07	4.78848e+06	5.1899e+06	1.77762e+07	3.64832e+06	9.11948e+06	2.44461e+06	1.77862e+06	6.49617e+06	4.63885e+06	7.68425e+06	3.39321e+06	5.04723e+06	2.77445e+06	6.14973e+06	6.65585e+06	5.89958e+06	6.04786e+06	4.89025e+06
1372	72.2257	329.233	0	297472	0	0	0	216267	0	138508	2.54601e+06	0	2.27835e+06	1.66375e+06	1.25458e+06	1.64639e+06	1.48503e+06	2.07707e+06	1.9045e+06	1.31946e+06	1.99417e+06	1.30186e+06	861360	396465	360679
1373	72.2566	293.124	0	0	1.64014e+06	0	0	219805	0	130211	0	1.51786e+06	2.25122e+06	78932.7	611092	1.89636e+06	1.74607e+06	1.23176e+06	3.55656e+06	1.24069e+06	2.78662e+06	2.67946e+06	149888	339957	0
1374	72.4794	263.113	1.64398e+07	1.06711e+06	2.93297e+06	1.23684e+06	2.15676e+06	4.21061e+06	4.03544e+06	2.98387e+06	0	1.11681e+06	9.12342e+06	2.42804e+06	2.51109e+06	5.89987e+06	7.27306e+06	9.6538e+06	1.10124e+07	5.79623e+06	2.07631e+07	9.87289e+06	7.60653e+06	7.20634e+06	6.68005e+06
1375	72.5248	114.736	2.639e+07	409723	259730	196162	0	7.10567e+06	1.60198e+06	188596	0	0	1.59767e+07	699434	941134	4.43571e+06	2.62073e+06	7.77411e+06	1.17528e+07	5.52444e+06	5.65735e+06	4.36491e+06	2.86842e+06	3.77128e+06	1.57617e+06
1376	72.561	203.055	1.601e+06	1.86415e+06	1.17215e+06	1.33791e+06	1.11809e+06	4.86002e+06	468737	2.05623e+06	2.1613e+06	981177	9.41671e+06	8.61589e+06	6.13694e+06	3.32258e+06	5.52568e+06	1.33015e+07	2.79733e+06	7.24504e+06	6.55849e+06	7.05006e+06	3.87564e+06	5.14957e+06	4.30479e+06
1377	72.5806	485.182	3.4136e+06	2.90074e+06	3.37843e+06	6.41157e+06	6.13741e+06	2.64475e+06	7.85837e+06	1.11011e+06	1.24426e+06	2.17477e+06	533499	0	314825	837910	168365	0	1.20775e+06	339837	92319.9	0	2.41296e+06	2.30345e+06	2.26242e+06
1378	72.5815	699.561	0	126152	263907	1.06658e+06	2.72618e+06	3.12057e+06	496994	1.23317e+06	1.88682e+06	6.16522e+06	241271	970555	409194	0	99103.5	1.7414e+06	193467	999190	544525	969015	846217	1.04018e+06	1.13498e+06
1379	72.5858	561.162	1.17463e+06	455063	2.7727e+06	127923	1.43337e+06	1.67895e+06	3.62956e+06	641766	427270	705260	0	73106.9	65351.6	206903	96137.4	0	0	75756.4	0	0	891682	496573	979819
1380	72.5864	115.415	2.20703e+07	369039	0	0	100768	7.67548e+06	643159	0	0	0	1.65285e+07	823129	1.02651e+06	4.06273e+06	2.51733e+06	7.03154e+06	1.34374e+07	7.14685e+06	1.16682e+07	3.80649e+06	1.92953e+06	3.14231e+06	1.47603e+06
1381	72.5915	758.577	4.21258e+06	699295	2.89085e+06	5.05841e+06	1.23096e+07	1.49625e+07	4.45267e+06	6.35912e+06	8.44043e+06	2.60379e+07	2.03309e+06	4.17347e+06	1.70593e+06	504782	832559	7.83725e+06	1.449e+06	4.47785e+06	3.4378e+06	3.89844e+06	5.58831e+06	5.48403e+06	6.55066e+06
1382	72.5936	538.164	2.69584e+06	216804	1.76519e+06	133391	1.00424e+06	807425	0	786607	0	3.28119e+06	0	0	0	0	0	0	0	0	81220.3	0	445089	281612	666270
1383	72.6066	122.974	6.99007e+07	2.44187e+08	8.88323e+08	3.40088e+08	4.04815e+08	2.53966e+08	3.32547e+08	2.86126e+08	2.65017e+08	1.44876e+08	5.13641e+07	7.16335e+07	1.36399e+07	9.73588e+06	2.88577e+07	7.60465e+07	1.08364e+07	1.22841e+08	3.23822e+07	6.39107e+07	1.84926e+08	8.71478e+07	1.24438e+08
1384	72.6066	149.023	860088	2.99604e+06	2.93031e+06	1.77495e+06	2.39765e+06	6.10829e+06	725432	3.08276e+06	2.98486e+06	2.61288e+06	825144	1.83206e+06	1.18243e+06	5.74972e+06	2.7182e+06	1.62849e+06	5.90274e+06	3.31788e+06	2.41079e+06	4.10359e+06	1.80007e+06	2.44515e+06	1.46169e+06
1385	72.6234	201.975	1.86544e+07	1.2877e+06	0	192845	93994.7	132431	1.62325e+06	472941	514052	71472.7	0	0	0	103840	0	100764	0	327230	0	0	803799	1.10569e+06	955858
1386	72.6352	116.079	0	677851	4.93101e+06	120696	2.02374e+06	0	0	4.07586e+06	627517	1.13154e+06	1.00255e+08	8.88136e+06	8.46852e+06	3.3349e+07	2.25436e+07	4.98566e+07	6.13243e+07	4.45386e+07	7.81496e+07	3.51158e+07	1.53505e+07	1.48632e+07	1.55507e+07
1387	72.648	698.558	1.14376e+06	455739	1.92665e+06	2.65126e+06	6.74145e+06	7.55674e+06	2.28271e+06	2.87197e+06	4.21986e+06	1.39211e+07	1.04513e+06	2.27653e+06	947690	228795	395552	4.10552e+06	1.17673e+06	2.5604e+06	2.06172e+06	1.9081e+06	3.08823e+06	3.01211e+06	3.31745e+06
1388	72.6732	208.054	3.33206e+08	3.89727e+06	2.99342e+06	5.58312e+06	6.7291e+06	3.44496e+06	1.72024e+07	5.22043e+06	5.3098e+06	3.30643e+06	727107	1.28101e+06	1.61663e+06	947977	3.08541e+06	1.33612e+06	1.80165e+06	991793	3.31855e+06	1.76447e+06	2.1439e+07	2.22923e+07	2.33774e+07
1389	72.6879	759.582	0	153838	1.15912e+06	1.98463e+06	5.71608e+06	6.95876e+06	2.2116e+06	2.96909e+06	4.02832e+06	1.26324e+07	718298	2.08597e+06	739966	114042	234838	3.91665e+06	416918	1.63558e+06	1.1141e+06	1.59061e+06	2.83509e+06	2.53494e+06	3.73129e+06
1390	72.8685	211.024	3.22002e+07	8.37945e+06	2.3998e+07	1.05614e+07	9.43737e+06	3.24575e+07	8.40112e+06	1.29669e+07	5.39568e+06	1.10669e+07	0	306088	178749	367408	1.30426e+06	645971	0	684231	1.15021e+06	0	1.05222e+07	1.12905e+07	1.16725e+07
1391	73.0135	475.145	0	899055	727488	820566	0	0	732430	598233	1.11945e+06	1.20201e+06	0	0	0	0	0	0	0	0	0	0	187631	196040	0
1392	73.1048	264.117	693927	0	185528	0	187406	0	0	130758	0	0	752668	99827	276508	680687	702392	971325	1.16318e+06	679061	2.12093e+06	1.19289e+06	378441	963005	0
1393	73.1952	537.161	1.08581e+07	1.70346e+06	8.55578e+06	1.40393e+06	4.68767e+06	5.21953e+06	2.09195e+06	3.92849e+06	1.15189e+06	1.27461e+07	0	0	0	0	0	0	0	0	0	0	2.74177e+06	3.12123e+06	3.11268e+06
1394	73.2307	99.0076	2.14807e+06	7.09508e+06	9.47072e+06	1.19654e+07	1.43521e+07	6.12846e+06	8.35148e+06	1.18153e+07	5.62832e+06	7.05215e+06	3.03572e+06	3.90292e+06	3.59769e+06	4.33513e+06	5.98625e+06	6.87604e+06	3.5713e+06	6.13734e+06	8.36513e+06	6.94223e+06	4.84724e+06	6.73449e+06	1.00314e+07
1395	73.3291	152.01	5.69593e+06	1.73905e+06	6.53539e+06	1.96201e+06	2.22154e+06	3.54965e+06	709845	3.50044e+06	8.57985e+06	4.31924e+06	2.86868e+06	2.58396e+06	3.07422e+06	3.37724e+06	4.69911e+06	1.80507e+06	3.55e+06	2.11957e+06	2.41549e+06	3.93838e+06	1.61797e+06	1.60417e+06	2.54945e+06
1396	73.344	401.218	0	0	0	0	0	138204	0	0	0	0	5.36361e+06	1.00545e+07	6.4131e+06	6.99987e+06	5.28036e+06	7.0663e+06	3.65257e+06	6.95214e+06	9.91065e+06	4.13515e+06	2.60771e+06	2.31656e+06	2.61132e+06
1397	73.4204	147.029	0	8.33195e+07	6.86473e+07	9.8912e+07	1.10988e+08	1.66823e+07	0	3.56823e+08	7.2814e+07	9.34805e+07	3.82947e+07	5.22254e+07	4.55002e+07	4.25873e+07	9.13016e+07	8.25408e+07	4.92416e+07	4.06079e+07	1.41213e+08	4.91772e+07	6.2055e+07	4.24062e+07	6.12506e+07
1398	73.4515	117.018	2.86021e+07	1.74866e+07	7.75349e+06	1.01925e+07	9.77591e+06	5.94923e+06	6.39499e+06	1.56065e+07	7.43528e+07	8.76273e+06	3.068e+06	5.03391e+06	1.30507e+07	1.33954e+07	1.57983e+07	7.12233e+06	8.5709e+06	1.12491e+08	9.58396e+07	1.26565e+07	6.78338e+06	8.39307e+06	9.39051e+06
1399	73.4651	163.006	2.82895e+06	5.5681e+06	4.2034e+06	1.90561e+06	3.69489e+06	6.62245e+06	1.96585e+06	5.43655e+06	1.04872e+07	4.54787e+06	802416	1.31277e+06	714826	1.35032e+06	1.21625e+06	1.07519e+06	1.46163e+06	1.12112e+06	920587	779912	3.27615e+06	3.04902e+06	2.74795e+06
1400	73.4651	474.262	0	1.62449e+06	1.74797e+06	2.26486e+07	5.27917e+06	1.38255e+06	381526	3.26224e+06	1.243e+06	0	0	2.2133e+06	0	0	0	6.97774e+06	55766.1	1.51714e+06	5.83651e+06	0	4.35946e+06	2.54993e+06	5.28701e+06
1401	73.4726	301.201	0	939917	0	391650	487361	959591	569483	1.33786e+06	1.25007e+06	565430	950800	1.32929e+06	1.15728e+06	1.04211e+06	1.2726e+06	792366	798975	1.65107e+06	2.1249e+06	703726	653304	452073	980306
1402	73.5018	148.032	0	4.5469e+06	2.38959e+06	5.3503e+06	5.58447e+06	0	0	1.91658e+07	3.86356e+06	3.96883e+06	1.85423e+06	2.3062e+06	2.10473e+06	1.99913e+06	5.15554e+06	4.15793e+06	2.22941e+06	1.60981e+06	7.03823e+06	1.94851e+06	1.56379e+06	1.13335e+06	1.41192e+06
1403	73.5336	402.221	0	0	0	0	0	0	0	0	0	0	396735	1.52933e+06	974434	1.14831e+06	506361	481359	255397	1.24508e+06	965605	412948	0	125616	135829
1404	73.576	373.15	0	153937	0	605502	112937	214826	0	495991	133494	0	1.46758e+06	2.03542e+06	1.81766e+06	2.02305e+06	3.2328e+06	2.55711e+06	1.78753e+06	1.85194e+06	6.77559e+06	2.10677e+06	1.46175e+06	2.13155e+06	1.61016e+06
1405	73.8809	391.143	3.33112e+06	805498	0	1.58594e+06	951521	0	964160	0	288770	625439	0	0	0	0	0	0	0	0	0	0	416218	342699	372234
1406	73.8889	225.112	1.39533e+06	4.81201e+06	3.79426e+06	4.56767e+06	2.18627e+06	4.97811e+06	3.58862e+06	5.88364e+06	1.49157e+06	1.3498e+06	4.71998e+07	5.60633e+07	4.78008e+07	5.38195e+07	5.31114e+07	5.26374e+07	4.72765e+07	5.6723e+07	8.85645e+07	4.81037e+07	2.43239e+07	2.55919e+07	2.67069e+07
1407	73.8889	226.116	0	0	0	416672	80445.4	138580	0	320068	143409	0	5.52824e+06	6.73754e+06	5.83077e+06	6.45131e+06	5.49967e+06	6.07931e+06	5.52747e+06	5.93628e+06	1.1611e+07	6.03738e+06	3.04239e+06	2.87998e+06	3.16586e+06
1408	74.0446	151.006	2.00318e+07	5.36471e+07	3.41503e+07	1.63429e+07	2.83454e+07	1.57918e+07	1.9693e+07	7.1173e+07	9.09118e+07	4.40689e+07	6.28397e+06	5.53719e+06	5.99589e+06	9.6508e+06	5.61123e+06	4.68991e+06	8.40668e+06	4.23309e+06	6.89508e+06	4.87046e+06	2.63829e+07	2.4835e+07	2.49652e+07
1409	74.0912	167.034	1.05103e+07	5.20384e+06	8.89077e+06	5.23152e+06	5.39671e+06	7.69145e+06	9.39906e+06	3.22254e+06	7.22275e+06	7.15176e+06	2.47629e+06	3.05463e+06	2.24985e+06	2.58684e+06	3.38233e+06	2.47553e+06	3.22292e+06	2.23782e+06	2.82681e+06	2.97062e+06	5.4501e+06	4.88795e+06	5.5847e+06
1410	74.2988	218.012	3.10543e+06	1.50703e+06	1.12083e+06	485262	1.04965e+06	4.44377e+06	1.09874e+06	1.37037e+06	3.76418e+06	2.50848e+06	0	0	116519	0	0	468549	1.70002e+06	0	128189	529098	1.08169e+06	1.26052e+06	1.1534e+06
1411	74.2988	267.091	394337	887540	954608	220012	560138	265186	102420	1.06336e+06	6.45226e+06	808588	381522	357886	459694	348300	84172.6	434438	130870	155047	365284	248135	753969	705358	597707
1412	74.324	183.999	8.48613e+06	1.75829e+07	6.44463e+07	1.09739e+07	1.36304e+07	1.56312e+07	1.88122e+07	1.08643e+07	2.34915e+07	8.9561e+06	0	0	0	0	0	0	0	0	0	0	1.43537e+07	1.52845e+07	1.43752e+07
1413	74.324	184.992	8.73795e+06	1.85017e+07	6.83077e+07	1.13756e+07	1.43402e+07	1.44698e+07	1.87574e+07	1.20231e+07	2.66322e+07	8.81024e+06	0	0	820683	0	973857	636965	0	911809	594740	1.57189e+06	1.23925e+07	1.36691e+07	1.41347e+07
1414	74.3451	80.9639	2.25719e+06	6.86376e+06	7.32482e+06	2.32056e+06	4.52622e+06	2.87913e+06	1.79688e+06	5.69358e+06	1.02501e+07	4.02483e+06	180853	251578	302941	917638	468022	413654	763250	336713	236808	0	3.27212e+06	2.719e+06	2.69159e+06
1415	74.3464	319.139	0	648691	2.14655e+06	951997	1.69441e+06	397763	0	4.54661e+06	1.50144e+06	964982	499548	1.25504e+06	930892	981473	1.73981e+06	1.3225e+06	592772	635540	2.07027e+06	1.0291e+06	1.14731e+06	1.16503e+06	1.1728e+06
1416	74.5704	139.006	1.32653e+07	4.17113e+06	1.04312e+07	5.46025e+06	1.19689e+07	1.51152e+07	8.44685e+06	1.45325e+07	1.73485e+07	1.3233e+07	1.89526e+06	2.94793e+06	3.48094e+06	4.14778e+06	3.79959e+06	968460	3.43542e+06	2.50293e+06	4.42829e+06	5.11913e+06	8.15702e+06	7.49051e+06	7.97361e+06
1417	74.7808	199.097	0	0	0	623894	352013	946489	274343	1.35571e+06	308429	792168	1.53486e+07	1.98509e+07	1.18462e+07	1.60999e+07	1.54843e+07	1.80446e+07	1.25016e+07	1.59344e+07	2.23894e+07	1.63185e+07	4.33179e+06	5.11317e+06	4.85746e+06
1418	74.9036	182.996	2.32123e+08	4.42953e+08	1.57449e+09	2.8252e+08	3.39071e+08	3.66597e+08	4.54014e+08	2.77736e+08	5.91543e+08	2.21195e+08	1.17899e+07	1.37474e+07	9.20999e+06	1.61862e+07	1.12538e+07	8.56793e+06	1.2336e+07	1.09793e+07	1.5603e+07	7.46329e+06	3.57887e+08	3.75121e+08	3.81247e+08
1419	74.9036	367.066	4.30594e+06	1.02549e+07	1.52739e+07	5.12911e+06	1.14671e+07	3.9549e+06	8.50877e+06	3.25795e+06	6.64519e+06	1.69007e+07	0	0	0	0	0	82057	0	592501	0	0	5.97879e+06	5.9401e+06	6.65815e+06
1420	75.0974	546.336	0	0	0	0	0	0	0	0	69892.5	0	906686	631572	506265	1.3374e+06	645635	1.00713e+06	767255	498794	698467	379362	0	324439	106789
1421	75.1962	172.105	255478	2.20029e+06	5.22515e+06	2.50597e+06	3.62984e+06	1.74892e+06	1.59403e+06	5.67782e+06	5.25333e+06	714598	3.57799e+06	8.13335e+06	7.28442e+06	7.37682e+06	5.75129e+06	5.33581e+06	3.17067e+06	5.17076e+06	6.74817e+06	5.10164e+06	3.8779e+06	4.79301e+06	4.19457e+06
1422	75.271	363.145	2.41457e+06	2.48362e+06	159668	2.51512e+06	202234	2.23144e+06	1.38691e+06	530415	1.37736e+06	431118	0	0	0	69156.3	68867	0	0	0	0	0	576270	722748	581044
1423	75.4549	171.102	1.66018e+07	3.02809e+07	7.78345e+07	2.85178e+07	4.52125e+07	2.47328e+07	2.57521e+07	7.31659e+07	6.56402e+07	2.49827e+07	6.74163e+07	1.26712e+08	1.11532e+08	1.22301e+08	9.52349e+07	9.23608e+07	5.79289e+07	8.77714e+07	1.21958e+08	8.20695e+07	7.14329e+07	7.81147e+07	7.85958e+07
1424	75.4549	543.39	0	0	0	0	0	0	0	0	62438	0	1.34379e+06	1.27277e+06	1.65161e+06	1.96924e+06	629294	1.72423e+06	1.16374e+06	1.66646e+06	3.1444e+06	1.12842e+06	0	441166	419495
1425	75.538	186.121	0	0	0	78671.6	0	0	0	0	0	0	1.728e+06	3.01518e+06	2.15074e+06	3.6925e+06	1.70559e+06	2.24625e+06	1.11399e+06	1.72042e+06	2.64236e+06	1.55543e+06	1.1478e+06	837645	721058
1426	75.7053	407.174	2.38128e+06	9.05012e+06	8.52856e+06	1.72336e+07	6.09238e+06	3.78623e+06	4.13262e+06	4.5686e+06	1.14131e+07	2.25548e+06	82883.6	1.97578e+06	653733	534503	82856.3	0	0	0	821511	605322	3.086e+06	3.3353e+06	3.49642e+06
1427	76.0586	145.013	2.92629e+07	8.15977e+06	1.06807e+07	6.67066e+06	8.47684e+06	7.87078e+06	5.11292e+06	8.1059e+06	1.06357e+07	6.58673e+06	1.86296e+06	3.66979e+06	2.62234e+06	1.85409e+06	7.30422e+06	9.40125e+06	2.16279e+06	2.75477e+06	1.49118e+07	1.67655e+07	6.67949e+06	7.55996e+06	7.79042e+06
1428	76.121	110.024	0	568828	2.78344e+06	401522	1.08995e+06	105338	356295	1.93448e+06	744476	965011	0	369413	218411	93725.1	93284.4	188035	237423	0	115404	189124	95379.8	159054	389468
1429	76.1615	408.177	0	1.02612e+06	645564	3.16312e+06	646102	727210	375197	445986	1.88467e+06	53781.9	0	220607	0	0	0	0	0	0	0	0	222775	135402	292199
1430	76.1668	181.049	1.69876e+09	1.01118e+07	2.33162e+06	6.24977e+06	8.17953e+06	3.06423e+07	9.45202e+06	6.09882e+06	1.78929e+07	2.14318e+07	4.34945e+06	7.81211e+06	7.22665e+06	7.64805e+06	9.32968e+06	5.17272e+06	1.06803e+07	3.57085e+06	3.56017e+06	1.15848e+07	9.66645e+07	1.15274e+08	1.01694e+08
1431	76.3183	233.031	2.59325e+06	1.92677e+06	4.71362e+06	2.5811e+06	2.64381e+06	3.07227e+06	1.24755e+06	3.7049e+06	2.9694e+06	3.8912e+06	0	0	0	0	0	0	813734	991047	2.41338e+06	1.04921e+06	3.10887e+06	3.92741e+06	3.41761e+06
1432	76.3364	351.039	3.94458e+06	4.1842e+06	8.38569e+06	6.73546e+06	3.9586e+06	465411	6.32675e+06	803107	2.53981e+06	2.39855e+06	0	0	0	0	0	0	0	0	0	0	1.91319e+06	2.62468e+06	1.92702e+06
1433	76.5305	377.124	0	847052	1.40174e+06	1.27484e+06	711757	274979	1.12973e+06	0	472086	420508	0	0	0	0	79147.2	0	0	0	0	0	148489	0	92344.9
1434	76.5692	124.97	4.54753e+07	1.87356e+06	2.89918e+07	4.93299e+06	6.31151e+06	5.83582e+06	5.85874e+06	2.44122e+06	2.37351e+06	2.96354e+06	0	0	0	0	0	0	0	147455	0	0	2.11247e+06	821659	1.50797e+06
1435	76.6163	256.2	8.23095e+06	1.68872e+07	7.01123e+06	6.29666e+06	2.76554e+06	4.82259e+06	6.68025e+06	6.07425e+06	2.78536e+06	3.45961e+06	1.76063e+06	2.70677e+06	2.21163e+06	4.03121e+06	2.6611e+06	2.87088e+06	2.30924e+06	2.77728e+06	2.94305e+06	1.63621e+06	3.55402e+06	3.62847e+06	5.01181e+06
1436	76.7882	457.333	1.50266e+06	2.3432e+06	1.28143e+06	2.42645e+06	736965	2.64894e+06	1.83319e+06	2.3992e+06	2.12829e+06	627604	580203	628571	586198	75253.4	305199	256048	570560	783940	581261	501800	913072	1.13503e+06	762230
1437	76.8388	94.0287	163816	389511	136665	540933	476696	1.25377e+06	290718	1.8556e+06	2.64106e+06	2.50168e+06	114875	1.08393e+06	513988	421354	1.44701e+06	761039	661380	173312	2.79134e+06	1.32562e+06	1.08781e+06	887423	727915
1438	76.9753	122.024	4.71213e+06	9.66063e+06	2.71628e+07	1.49612e+07	2.62814e+07	2.55327e+07	1.13053e+07	3.27957e+07	4.85103e+07	3.68894e+07	5.92131e+06	2.30466e+07	1.65617e+07	8.8424e+06	3.17899e+07	1.4409e+07	1.07408e+07	1.1949e+07	5.20685e+07	2.1141e+07	2.45131e+07	2.47537e+07	2.20526e+07
1439	77.0521	213.022	2.29795e+06	2.99464e+06	1.40012e+06	5.06156e+06	1.6837e+06	3.61205e+06	2.68824e+06	909386	2.02349e+06	348695	0	0	0	0	0	0	0	0	0	0	581770	806716	927117
1440	77.1001	197.117	0	1.42908e+06	0	1.43134e+06	847579	0	603715	1.18602e+06	135603	752315	4.25147e+06	7.37244e+06	6.99269e+06	1.22287e+07	5.81052e+06	4.75203e+06	6.89896e+06	3.3823e+06	1.11353e+07	5.97375e+06	2.77064e+06	3.41244e+06	2.84256e+06
1441	77.1001	383.207	221879	0	0	0	0	0	0	0	0	0	2.69166e+06	2.8404e+06	1.07754e+06	1.69622e+06	2.23054e+06	2.57985e+06	2.57008e+06	633178	1.83795e+06	1.01205e+06	434374	512148	392201
1442	77.1025	272.231	0	1.2839e+06	235672	1.42784e+06	164028	1.53746e+06	863859	1.84089e+06	652464	365224	6.70322e+06	6.30263e+06	3.78997e+06	4.98627e+06	5.17608e+06	4.50403e+06	5.30629e+06	5.14557e+06	5.0211e+06	3.08091e+06	1.97916e+06	2.81223e+06	2.11094e+06
1443	77.1049	271.228	5.28732e+06	1.54149e+07	5.04596e+06	8.08394e+06	3.78978e+06	1.01494e+07	1.42095e+07	1.15133e+07	8.74577e+06	3.12665e+06	4.20607e+07	2.57694e+07	2.34485e+07	2.69219e+07	2.35934e+07	4.23549e+07	2.46252e+07	4.16756e+07	3.29579e+07	1.83396e+07	1.39511e+07	1.62922e+07	2.46965e+07
1444	77.145	182.053	1.56245e+08	0	0	0	0	1.72776e+06	0	0	189628	300770	146867	99643.6	592091	123220	76473.9	142264	276172	107977	0	345450	1.01363e+07	9.34569e+06	8.74862e+06
1445	77.1854	275.023	2.14252e+06	4.0666e+06	9.40662e+06	1.71386e+06	2.66838e+06	5.87965e+06	1.16976e+06	1.64761e+06	6.96104e+06	2.71762e+06	0	0	0	0	0	0	0	0	0	0	1.57421e+06	2.3798e+06	1.89122e+06
1446	77.6333	317.124	0	542502	0	107318	717776	540832	496261	448054	492272	1.41433e+06	4.21947e+06	7.49037e+06	2.94618e+06	6.46198e+06	1.01215e+07	5.05091e+06	4.83564e+06	2.53379e+06	3.02954e+06	3.86411e+06	5.1432e+06	3.90235e+06	1.91898e+06
1447	77.8441	699.229	266003	0	0	0	889916	1.05747e+06	1.44276e+06	1.15988e+06	215506	1.0768e+06	1.28485e+06	586277	1.33021e+06	2.13813e+06	372554	1.15934e+06	1.37641e+06	209764	0	1.68964e+06	663680	635936	1.02608e+06
1448	77.8465	325.202	1.69594e+06	3.85407e+06	2.82664e+06	2.83402e+06	1.9726e+06	1.07508e+06	3.79208e+06	2.87833e+06	1.92115e+06	2.27036e+06	8.54869e+06	1.11807e+07	9.88684e+06	1.51614e+07	1.08853e+07	9.32026e+06	6.3276e+06	8.37996e+06	1.01675e+07	1.12302e+07	5.9498e+06	5.71872e+06	5.33915e+06
1449	77.8605	337.132	2.86251e+06	5.96388e+06	8.25663e+06	1.11219e+07	5.1915e+06	1.80582e+06	6.99833e+06	1.22381e+06	4.83532e+06	5.48344e+06	0	0	0	0	0	0	0	186696	0	0	3.44843e+06	3.28351e+06	2.82202e+06
1450	77.9219	327.038	3.17514e+06	1.25574e+06	921843	0	0	554032	0	2.72988e+06	3.82908e+06	1.39265e+06	0	0	0	0	0	0	0	0	0	0	149481	527510	769181
1451	77.9264	160.039	1.80889e+07	1.46391e+06	1.10872e+06	891391	847670	4.4886e+06	1.44703e+06	792696	624509	1.42135e+06	1.0596e+06	425354	339415	595653	1.08911e+06	630112	740968	0	1.49408e+06	843121	2.11695e+06	1.91418e+06	2.28162e+06
1452	77.9626	508.19	880086	0	152863	0	146655	253998	662109	0	0	295087	1.85058e+06	2.54476e+06	6.27792e+06	0	1.1526e+06	1.2921e+06	4.69842e+06	3.46414e+06	602462	1.85531e+06	506857	799842	1.10375e+06
1453	77.9781	345.097	0	0	0	76636.6	75301.1	0	0	0	0	0	1.0346e+06	4.3177e+06	1.0839e+06	2.26938e+06	1.0828e+07	4.43208e+06	796481	0	1.23232e+06	1.78244e+06	1.43645e+06	1.14361e+06	1.66469e+06
1454	78.3598	232.028	2.71649e+07	2.75791e+06	1.63507e+06	1.4194e+07	4.16455e+06	4.05241e+07	1.49321e+07	1.07296e+07	1.38248e+07	8.00104e+06	8.45154e+06	737664	4.20485e+06	3.22282e+06	7.99844e+06	1.70498e+07	1.14721e+07	8.75622e+06	2.84325e+07	1.32069e+07	2.80317e+07	2.798e+07	2.80388e+07
1455	78.5353	452.374	1.15075e+06	2.2528e+06	1.89204e+06	2.27429e+06	1.13049e+06	248910	1.87611e+06	1.36646e+06	2.1941e+06	538834	0	0	0	0	0	0	0	0	0	0	604374	970126	650744
1456	78.6558	205.035	7.05246e+06	2.53238e+06	4.67233e+06	1.75025e+06	1.17452e+06	2.00953e+07	2.83683e+06	4.41201e+06	8.3647e+06	1.68437e+06	0	0	43999.3	533469	0	354251	230071	648220	1.06182e+06	2.3528e+06	2.53889e+06	2.42691e+06	3.08493e+06
1457	78.826	186.084	0	0	0	0	0	0	0	0	0	0	1.2554e+06	1.9676e+06	1.56676e+06	7.86076e+06	1.57358e+06	1.59569e+06	1.29759e+06	1.4113e+06	2.49858e+06	1.44604e+06	476404	422241	781078
1458	79.0998	429.213	0	1.16354e+06	1.30144e+06	948827	1.57834e+06	2.92562e+06	0	2.70069e+06	432908	599564	1.3509e+07	2.32864e+07	1.25072e+07	7.49972e+06	1.11142e+07	1.71162e+07	1.0942e+07	1.75504e+07	2.16018e+07	8.18069e+06	7.15215e+06	7.63291e+06	7.81518e+06
1459	79.0998	430.215	0	190400	0	0	239464	433154	0	313109	77464.4	0	2.65353e+06	5.11332e+06	2.50129e+06	983734	2.50461e+06	3.00916e+06	2.00022e+06	3.946e+06	5.16617e+06	1.70105e+06	1.17328e+06	1.10541e+06	1.33225e+06
1460	79.1624	300.039	4.59042e+06	260951	2.1131e+06	2.83176e+07	1.79662e+07	8.67963e+06	1.42634e+07	5.64443e+06	9.5141e+06	4.15093e+07	5.32787e+06	0	1.30105e+06	0	5.31454e+06	2.45712e+07	2.94348e+06	1.79425e+07	6.48216e+06	6.4457e+06	1.0716e+07	1.04334e+07	7.90968e+06
1461	79.2095	107.049	4.40637e+07	1.71844e+07	2.13188e+07	1.16916e+07	1.06314e+07	2.31793e+07	1.25571e+07	1.3165e+07	9.26917e+06	9.82889e+06	494098	278691	175605	886818	339341	363225	813604	264647	149307	252623	9.76214e+06	1.02084e+07	1.06703e+07
1462	79.2419	330.143	0	0	0	0	0	0	0	0	148336	36324.6	139558	7.13644e+06	8.10314e+06	3.27184e+06	7.32134e+06	4.41989e+06	603841	7.55185e+06	3.40518e+06	850799	1.85711e+06	1.23647e+06	1.43032e+06
1463	79.5822	759.25	4.07664e+06	0	770148	178162	724215	2.25322e+06	2.67374e+06	1.42628e+06	868197	2.27448e+06	4.79008e+06	959905	1.79277e+06	695045	1.04922e+06	1.9805e+06	608488	112109	644817	6.91678e+06	999540	1.16607e+06	1.52914e+06
1464	79.5835	295.046	1.06521e+07	8.24828e+06	8.32979e+06	8.98775e+06	4.60546e+06	5.14677e+06	5.7342e+06	3.91645e+06	5.64334e+06	4.52835e+06	0	0	0	0	0	0	0	0	0	0	3.93116e+06	3.16334e+06	3.23142e+06
1465	79.5836	173.117	1.45907e+06	2.26441e+06	1.96472e+06	2.95298e+06	2.52726e+06	8.01966e+06	3.8145e+06	4.3634e+06	3.16593e+06	2.98092e+06	3.21978e+07	5.72818e+07	2.73564e+07	2.74831e+07	1.96216e+07	3.4146e+07	1.87479e+07	2.15695e+07	5.45886e+07	2.22946e+07	1.75295e+07	1.66243e+07	1.72737e+07
1466	79.5836	349.057	2.64505e+06	5.89375e+06	5.97446e+06	2.40152e+06	5.43087e+06	1.35496e+06	4.2343e+06	1.31445e+06	1.36268e+06	5.0506e+06	118990	501168	366989	208240	795314	365228	0	789690	502527	826060	2.39603e+06	1.4376e+06	2.24626e+06
1467	79.6123	136.047	5.16926e+07	1.95184e+07	2.65565e+07	1.44875e+07	1.17722e+07	3.05764e+07	1.54472e+07	1.63575e+07	1.1072e+07	1.07136e+07	0	0	0	0	0	0	0	0	0	0	1.36722e+07	1.27994e+07	1.27968e+07
1468	79.6484	545.369	0	0	0	0	0	0	0	61456.1	0	0	1.14788e+06	1.39418e+06	374818	0	160869	1.45238e+06	728918	1.4288e+06	1.94259e+06	571837	141318	282205	334968
1469	79.6771	314.242	904831	1.90127e+06	1.79527e+06	5.12367e+06	1.63176e+06	1.09711e+07	6.52791e+06	3.60965e+06	643890	568961	273597	1.97014e+06	2.7423e+06	640644	505915	942448	1.46643e+06	670370	2.89587e+06	2.35029e+06	1.85655e+06	2.40511e+06	1.57219e+06
1470	79.7356	73.0283	643398	2.70794e+06	1.08643e+06	2.74882e+06	1.74571e+06	1.00932e+06	1.15222e+06	2.35172e+06	1.67792e+06	2.0473e+06	1.11367e+06	2.33175e+06	3.31642e+06	2.31926e+06	1.15709e+06	4.89019e+06	2.05339e+06	1.46735e+06	2.1847e+06	2.84719e+06	1.47948e+06	1.91364e+06	2.87214e+06
1471	79.8422	371.317	2.64541e+06	4.55707e+06	2.67775e+06	5.74009e+06	2.22926e+06	3.01888e+06	5.84656e+06	4.09604e+06	2.75681e+06	1.05035e+06	427080	92453.6	423368	112468	240461	261603	332987	854565	435987	60745.8	1.13537e+06	1.70105e+06	1.42508e+06
1472	79.8883	113.023	9.99273e+06	4.10574e+06	1.45455e+07	2.20477e+07	1.09944e+07	1.53294e+07	9.97557e+06	1.39608e+07	1.81569e+07	1.45603e+07	5.94443e+06	3.98666e+06	3.27587e+07	8.44282e+06	9.26634e+06	6.03175e+06	8.11294e+06	6.46703e+06	9.30218e+06	8.99728e+06	1.19436e+07	8.51949e+06	1.17754e+07
1473	80.0952	565.229	1.35532e+06	458530	829877	202646	412688	1.25726e+06	563076	748104	116601	950233	3.72851e+06	1.55e+06	4.56635e+06	5.98357e+06	4.78487e+06	2.45903e+06	2.24527e+06	3.53631e+06	2.29629e+06	3.45966e+06	971760	1.09599e+06	827434
1474	80.1008	185.081	982910	1.58616e+06	0	2.09744e+06	1.61737e+06	4.45525e+06	967373	1.85955e+06	1.70231e+06	2.24036e+06	1.55738e+07	3.1334e+07	1.26086e+07	8.68367e+07	2.95498e+07	2.82194e+07	2.01921e+07	8.95896e+06	3.85551e+07	1.99054e+07	7.2305e+06	1.14161e+07	1.28588e+07
1475	80.1008	329.27	0	0	0	0	0	0	0	0	0	0	2.02076e+06	5.74272e+06	1.62965e+06	0	1.23755e+06	600042	1.72188e+06	4.66191e+06	4.46749e+06	2.11216e+06	1.26272e+06	1.4262e+06	1.17088e+06
1476	80.2715	281.114	0	0	164330	660762	558130	307060	0	0	108873	265232	628940	510851	0	484123	0	1.27712e+06	235155	565735	0	498893	2.69624e+06	2.84197e+06	2.76801e+06
1477	80.3042	397.045	1.71688e+07	3.67207e+07	8.57484e+07	3.5889e+07	5.04914e+07	5.92531e+06	3.44168e+07	9.39113e+06	9.99314e+07	4.99143e+07	0	0	0	0	0	0	0	0	0	0	3.08652e+07	3.08074e+07	3.05326e+07
1478	80.3978	134.036	3.73492e+07	1.5654e+07	2.01117e+07	1.0429e+07	9.73525e+06	2.19256e+07	1.1872e+07	1.20345e+07	8.7631e+06	9.08453e+06	0	0	0	0	0	0	0	90241.6	0	0	1.30945e+06	9.5353e+06	9.39671e+06
1479	80.4631	701.437	2.16416e+06	806108	910299	2.51731e+06	291779	579756	2.18268e+06	985792	0	264970	0	0	0	0	0	0	0	0	0	0	227995	559798	668788
1480	80.4783	512.148	5.80415e+06	240324	3.14198e+06	382402	1.13784e+06	2.79735e+06	3.98198e+06	1.64451e+06	1.62318e+06	5.42919e+06	90698.5	0	248513	414255	0	237729	92117.4	0	0	1.68524e+06	1.42753e+06	1.15092e+06	1.49984e+06
1481	80.5108	344.086	216267	125134	0	0	32512.3	379259	58002	0	0	0	575644	1.64174e+06	190293	767785	2.55369e+06	4.39728e+06	1.11785e+06	1.0896e+06	1.0464e+06	1.93301e+06	515518	592283	399895
1482	80.5206	169.086	3.84319e+07	5.02741e+07	6.6772e+07	6.18143e+07	5.93136e+07	1.24021e+08	7.05682e+07	6.76172e+07	7.32826e+07	6.60578e+07	2.09961e+09	2.26639e+09	1.87802e+09	4.47431e+09	3.55596e+09	1.59972e+09	1.85565e+09	1.95121e+09	1.92332e+09	1.09933e+09	1.05519e+09	1.06982e+09	1.07153e+09
1483	80.5206	206.012	3.13532e+06	563382	2.53251e+06	4.00967e+06	1.44331e+06	3.71045e+06	1.84644e+06	2.8604e+06	2.41749e+06	1.72883e+06	0	0	0	0	0	0	55054.7	0	0	0	1.33137e+06	1.41599e+06	1.27725e+06
1484	80.5206	398.047	2.04764e+06	5.52206e+06	1.28363e+07	5.07106e+06	7.43909e+06	305551	5.30566e+06	1.34468e+06	1.45114e+07	7.67644e+06	0	0	0	0	0	0	0	0	0	0	4.29751e+06	3.90053e+06	4.46684e+06
1485	80.5332	649.432	3.87542e+06	5.77499e+06	6.34067e+06	9.74779e+06	6.83254e+06	4.76219e+06	3.20275e+06	6.13915e+06	7.94837e+06	7.03917e+06	1.26979e+07	6.41833e+06	4.80264e+06	4.2645e+06	4.34177e+06	6.69257e+06	7.15909e+06	9.9801e+06	6.56083e+06	6.18768e+06	6.77683e+06	6.69304e+06	5.77152e+06
1486	80.5653	125.096	0	8.91862e+06	1.20804e+07	1.20018e+07	1.18421e+07	2.48449e+07	1.19541e+07	1.31584e+07	1.4316e+07	1.36617e+07	4.2092e+08	4.2298e+08	3.68711e+08	8.97267e+08	6.9201e+08	3.0296e+08	3.9129e+08	3.83397e+08	3.60418e+08	2.15975e+08	2.09213e+08	2.14302e+08	2.05877e+08
1487	80.5665	133.05	1.12854e+06	2.49272e+06	1.5058e+06	883619	2.26027e+06	2.46605e+06	830531	2.79412e+06	3.20819e+06	3.52358e+06	1.02454e+06	5.51409e+06	5.38094e+06	3.98722e+06	2.85439e+06	1.0037e+06	3.19321e+06	2.3301e+06	5.19945e+06	5.66913e+06	2.29894e+06	3.1736e+06	1.8994e+06
1488	80.5816	170.089	2.74254e+06	4.19544e+06	6.07151e+06	5.57165e+06	4.64751e+06	1.09984e+07	6.51446e+06	6.43526e+06	6.07852e+06	2.68136e+06	2.1669e+08	2.18201e+08	1.8603e+08	4.40871e+08	3.56705e+08	1.55522e+08	1.85939e+08	1.91361e+08	1.82149e+08	1.04124e+08	9.90014e+07	1.00759e+08	1.05401e+08
1489	80.6218	123.08	0	0	0	0	0	0	0	0	0	0	1.64399e+07	1.61177e+07	1.43625e+07	3.26331e+07	2.48401e+07	1.42855e+07	1.40711e+07	1.62925e+07	1.43159e+07	8.70581e+06	6.64802e+06	4.96686e+06	5.32691e+06
1490	80.6218	126.099	0	441388	589396	532291	717913	1.74954e+06	465473	658203	708024	642640	3.50942e+07	3.45999e+07	3.0158e+07	7.24665e+07	5.84282e+07	2.44474e+07	3.08366e+07	3.20871e+07	2.84647e+07	1.66214e+07	1.71465e+07	1.70833e+07	1.59312e+07
1491	80.6218	531.317	0	0	0	0	0	0	0	0	0	0	1.85993e+06	1.8979e+06	333784	2.08633e+06	449440	1.34224e+06	1.18406e+06	939045	1.10551e+06	1.09159e+06	300935	437534	559810
1492	80.6257	110.698	1.52381e+07	3.10092e+06	6.14419e+06	6.85444e+06	1.41586e+06	4.20566e+06	1.13174e+07	3.09539e+06	101202	1.60681e+06	0	189427	70978.9	278891	0	2.04415e+06	0	245249	0	690823	5.50032e+06	4.33411e+06	3.68307e+06
1493	80.6257	481.135	3.86573e+07	1.24542e+06	9.51913e+06	1.61372e+06	3.45993e+06	6.76287e+06	9.75984e+06	2.6207e+06	4.25064e+06	1.67614e+07	3.10542e+07	5.71498e+06	2.74748e+07	6.17591e+07	1.08062e+07	1.03463e+07	8.90691e+06	3.3922e+06	6.31686e+06	2.57556e+07	1.43309e+07	1.44575e+07	1.51032e+07
1494	80.6257	531.149	2.52883e+06	594596	3.11863e+06	881092	816821	1.53097e+06	3.60181e+06	805862	849808	1.20927e+06	0	0	0	0	174010	0	0	0	0	0	369466	375804	516828
1495	80.7245	650.434	898025	2.62326e+06	2.07281e+06	3.96409e+06	2.61819e+06	1.86501e+06	1.57682e+06	2.36106e+06	3.27412e+06	3.13962e+06	4.69176e+06	2.54504e+06	2.27129e+06	1.60805e+06	1.79612e+06	2.58344e+06	2.68064e+06	3.82727e+06	2.37872e+06	2.92634e+06	2.75524e+06	2.45794e+06	2.20189e+06
1496	80.73	151.075	0	0	2.205e+06	0	0	0	0	0	0	0	4.03571e+06	4.05573e+06	2.79601e+06	1.71567e+06	4.09349e+06	5.82183e+06	2.52973e+06	5.30952e+06	4.71055e+06	1.79883e+06	0	402723	2.01927e+06
1497	80.7322	340.185	0	0	0	0	0	0	92662.5	0	0	0	3.12295e+06	1.49716e+06	2.88425e+06	1.49171e+07	9.15517e+06	880753	3.38541e+06	3.32747e+06	1.45186e+06	452042	393388	443346	268109
1498	80.7342	111.341	1.6295e+07	3.12962e+06	6.30971e+06	8.42193e+06	1.42207e+06	4.95127e+06	1.24465e+07	3.10716e+06	102216	1.57102e+06	274082	0	0	268571	0	2.05517e+06	0	245575	0	607136	4.89266e+06	4.31865e+06	3.8825e+06
1499	80.7342	759.504	0	0	0	0	0	62159.8	0	260799	199958	0	2.92944e+06	1.61813e+06	1.04702e+06	2.58019e+06	2.31152e+06	554609	2.05868e+06	2.01881e+06	234428	659223	1.21148e+06	1.01452e+06	1.18133e+06
1500	80.7465	303.145	139388	0	0	85777.4	137833	0	147488	112044	0	72280.5	1.09547e+06	5.1711e+06	3.92124e+06	6.29963e+06	4.50844e+06	1.60568e+06	3.1744e+06	1.80203e+06	2.69407e+06	2.69283e+06	642980	967899	437339
1501	80.7549	124.712	0	0	0	0	0	0	0	0	44531.9	0	2.64834e+06	1.28112e+06	2.13782e+06	6.53349e+06	4.32598e+06	1.12709e+06	2.13393e+06	1.12099e+06	726949	438860	1.20134e+06	1.52519e+06	1.25319e+06
1502	80.8402	214.071	1.86044e+06	0	760683	41549.6	2.83002e+06	2.21981e+06	1.18009e+06	686143	2.71223e+06	5.16945e+06	644815	689190	917569	1.2394e+06	0	163819	1.09506e+06	741845	923773	1.23033e+06	660571	853904	757984
1503	80.8426	347.134	2.23607e+06	0	57484.2	538543	519409	97972.9	334167	287485	131449	971270	3.96922e+06	2.59019e+06	7.02873e+06	1.38028e+07	1.7938e+07	3.0794e+06	7.46051e+06	2.39264e+06	6.22295e+06	6.22119e+06	2.98662e+06	2.35512e+06	2.54444e+06
1504	80.8963	413.218	0	0	0	0	0	0	0	0	0	0	1.7738e+06	2.81569e+06	1.21899e+06	118513	1.21617e+06	1.90155e+06	1.74103e+06	326757	2.2832e+06	1.08697e+06	319821	355949	628672
1505	80.9032	563.176	2.27072e+06	1.26805e+06	2.50088e+06	197932	3.27387e+06	1.77905e+06	1.75505e+06	1.04866e+06	42332.5	2.27768e+06	0	0	0	0	0	0	0	0	0	0	332766	0	405748
1506	80.9711	473.26	357993	2.73659e+06	1.49942e+06	586948	2.61591e+06	2.86355e+06	718440	5.67821e+06	2.17163e+06	1.68277e+06	0	181137	930837	783449	173567	0	489399	0	180882	486682	1.08229e+06	1.09264e+06	658832
1507	80.9845	437.144	3.70454e+06	5.2029e+06	1.05331e+06	1.63127e+06	1.14543e+06	1.97538e+06	2.49592e+06	1.25067e+06	1.32985e+06	3.63069e+06	118066	165370	110085	0	0	0	93040.6	137445	0	0	1.17601e+06	712832	1.13037e+06
1508	81.0461	313.238	1.23837e+07	1.62211e+07	2.11222e+07	2.43761e+07	1.27749e+07	6.24742e+07	3.5725e+07	3.85527e+07	5.42452e+06	4.27658e+06	1.58903e+07	2.08538e+07	1.95375e+07	2.27631e+07	1.70873e+07	1.3725e+07	1.36526e+07	1.08823e+07	3.00489e+07	2.98203e+07	1.86654e+07	2.56144e+07	2.46724e+07
1509	81.1006	169.692	0	0	121399	0	66292.9	608623	0	0	37715.5	0	1.96489e+07	1.42378e+07	2.30827e+07	4.12512e+07	2.6146e+07	1.51882e+07	1.46495e+07	1.36378e+07	1.6222e+07	4.9605e+06	1.0089e+07	9.34077e+06	8.513e+06
1510	81.1981	175.097	3.26419e+07	2.37469e+07	3.97434e+07	0	2.22145e+07	6.45637e+07	2.55696e+07	4.69043e+07	3.25133e+06	0	2.76069e+09	4.49979e+09	2.06628e+09	1.62437e+09	1.92681e+09	4.27534e+09	1.23792e+09	3.0474e+09	4.07286e+09	3.22512e+09	1.4207e+09	1.39825e+09	1.40031e+09
1511	81.1981	176.1	740218	1.67314e+06	3.74455e+06	1.0596e+06	1.45082e+06	4.39377e+06	1.40482e+06	3.64062e+06	870801	243702	2.28889e+08	3.57516e+08	1.69308e+08	1.36667e+08	1.56594e+08	3.52989e+08	1.01095e+08	2.48822e+08	3.37189e+08	1.85422e+08	1.20967e+08	1.18485e+08	1.15099e+08
1512	81.2269	511.144	2.67217e+07	1.79007e+06	1.47509e+07	2.93802e+06	5.52766e+06	1.07953e+07	1.68027e+07	8.47263e+06	6.87498e+06	2.30721e+07	4.79039e+06	1.50698e+06	4.13445e+06	4.91851e+06	1.69449e+06	2.27738e+06	411072	433146	1.45737e+06	7.39834e+06	7.46548e+06	7.15823e+06	8.3479e+06
1513	81.2647	351.202	5.95607e+06	6.6857e+06	4.84223e+06	6.05418e+06	5.92525e+06	9.2406e+06	5.74439e+06	1.47603e+07	2.72087e+06	1.10421e+06	1.10738e+07	2.24459e+07	6.30708e+06	5.5898e+06	5.38225e+06	2.03993e+07	2.33417e+06	1.11283e+07	1.55843e+07	6.70866e+06	5.66378e+06	5.93481e+06	5.55815e+06
1514	81.3025	175.735	0	0	0	0	0	0	0	0	0	0	2.36979e+07	3.79877e+07	1.97322e+07	1.15522e+07	1.24672e+07	2.82672e+07	1.07557e+07	1.05563e+07	3.05454e+07	1.33735e+07	1.03052e+07	9.66216e+06	5.67729e+06
1515	81.3685	335.078	72562.7	2.06886e+06	4.35134e+06	1.9325e+06	2.79393e+06	419866	3.10035e+06	1.51838e+06	817043	460020	0	0	0	0	0	96326.9	0	0	0	0	268267	306746	474499
1516	81.3843	168.483	0	0	0	87947.4	406264	718749	0	46994.7	404057	53634.1	1.85876e+07	1.66165e+07	2.1616e+07	3.9597e+07	2.49218e+07	7.87936e+06	1.64452e+07	9.8262e+06	1.27426e+07	6.20901e+06	6.7738e+06	8.74789e+06	7.64695e+06
1517	81.3894	112.022	7.12772e+07	1.75262e+07	2.6518e+07	3.1087e+07	6.73456e+06	1.97674e+07	9.10827e+07	1.5292e+07	1.25581e+06	8.81285e+06	2.88426e+06	2.37253e+06	70744.1	2.43759e+06	0	8.91355e+06	1.70548e+06	2.58165e+06	1.01048e+06	4.43133e+06	1.85075e+07	1.99951e+07	1.9328e+07
1518	81.4255	111.019	1.67521e+09	4.40421e+08	6.30432e+08	7.51502e+08	1.7202e+08	4.72717e+08	2.11583e+09	3.70101e+08	3.46912e+07	2.14314e+08	6.82735e+07	7.01009e+07	7.35976e+06	7.01292e+07	1.62161e+07	2.1475e+08	4.04894e+07	6.4585e+07	3.38058e+07	1.12706e+08	4.56587e+08	4.7474e+08	4.60334e+08
1519	81.5715	209.012	627313	9.08167e+06	1.84612e+07	3.85179e+06	3.03213e+06	4.03665e+06	5.95698e+06	2.16668e+06	8.91648e+06	4.35158e+06	279010	0	0	255533	489913	0	455935	123578	184641	0	4.17243e+06	4.84178e+06	4.2059e+06
1520	81.8616	447.132	926416	564076	1.39861e+06	351858	571660	409181	503261	629629	694625	1.45624e+06	0	0	0	0	0	0	107212	168402	0	119828	276384	683167	0
1521	81.9506	427.171	138762	121680	104825	63638	255925	474037	188843	67012.5	134082	651313	129442	1.72554e+06	511575	0	0	255365	421597	213623	174449	231155	1.01601e+06	642857	961942
1522	82.0054	259.155	0	252882	64025	0	449596	277900	0	948997	1.10594e+06	0	3.4926e+06	3.84436e+06	3.39232e+06	4.5062e+06	2.18234e+06	2.33689e+06	3.77688e+06	2.8711e+06	6.06624e+06	2.85575e+06	1.82171e+06	1.94718e+06	1.34738e+06
1523	82.0458	451.124	1.26881e+07	307637	2.51541e+06	69233.2	1.0045e+06	6.29267e+06	1.36849e+06	81696.2	993789	3.77425e+06	5.41226e+06	1.11547e+06	5.88081e+06	1.2767e+07	9.58164e+06	2.44227e+06	2.99057e+06	528444	3.13208e+06	5.37802e+06	3.96865e+06	3.2658e+06	3.67342e+06
1524	82.0989	97.0282	2.15861e+07	5.8852e+06	1.01853e+07	1.04315e+07	6.90597e+06	8.55741e+06	6.36001e+06	1.06789e+07	3.8938e+06	4.35053e+06	359344	3.90277e+06	3.23149e+06	724110	1.46987e+06	1.13247e+06	2.53203e+06	1.25515e+06	2.84924e+06	4.08564e+06	3.58039e+06	3.10652e+06	3.4165e+06
1525	82.2346	325.071	863703	0	334780	116259	273942	0	365907	0	341717	118927	892493	7.91571e+06	813606	1.38962e+06	1.29172e+07	1.05935e+07	3.31697e+06	2.2323e+06	2.37239e+06	3.21812e+06	892055	2.74181e+06	2.45465e+06
1526	82.3041	345.192	0	0	0	0	0	0	0	0	38642.2	0	2.14087e+06	1.27127e+06	1.74906e+06	707896	0	1.37091e+06	426597	2.58948e+06	4.10425e+06	381246	158217	99233.5	90077.8
1527	82.3547	635.416	0	481401	359505	778779	668767	798049	171604	554316	830347	773000	288775	0	0	0	0	0	135848	788414	206248	0	0	167669	242705
1528	82.4381	189.003	167222	1.74253e+06	2.30212e+07	9.01252e+06	1.69839e+07	485418	45311	5.4833e+06	1.58867e+07	1.48636e+06	1.8817e+06	4.95431e+06	2.49631e+06	3.49564e+06	282863	1.18956e+07	6.53182e+06	5.39378e+07	4.02858e+07	1.01018e+07	1.62573e+07	1.22873e+07	1.03109e+07
1529	82.4642	174.461	0	0	0	0	0	0	0	46442.7	0	0	2.35064e+07	5.71289e+07	2.26803e+07	1.16235e+07	1.21629e+07	1.48966e+07	6.79691e+06	1.98043e+07	1.62191e+07	1.4838e+07	8.78648e+06	5.32574e+06	5.46099e+06
1530	82.62	191.001	3.44924e+06	4.75115e+06	3.59929e+06	780151	716083	2.06073e+06	1.37994e+06	2.87542e+06	3.00434e+06	972764	333964	0	265115	1.19993e+06	225125	130517	706442	491161	149852	0	2.17719e+06	1.41765e+06	1.37836e+06
1531	82.62	317.098	1.09708e+06	144962	161170	0	784288	1.33013e+06	329789	0	696932	1.61563e+06	1.49152e+06	3.63151e+06	1.44782e+06	1.31619e+06	5.36671e+06	1.71946e+06	1.81963e+06	585306	394228	1.74201e+06	974802	1.39122e+06	1.06689e+06
1532	82.7474	358.296	2.86793e+06	76565.2	669213	0	2.86652e+06	475893	1.92015e+06	1.26897e+06	5.19372e+06	5.01618e+06	0	2.4223e+06	0	0	0	1.47659e+06	491429	1.61941e+06	0	0	924984	1.1025e+06	795257
1533	82.7712	307.028	616039	521713	789135	711538	1.26379e+06	897186	370790	995873	507027	471247	0	0	0	0	0	0	0	0	0	0	189563	124200	149447
1534	82.8826	177.1	935456	1.57227e+06	0	0	0	276766	862336	0	0	0	1.61223e+07	2.72784e+07	1.43982e+07	5.55888e+06	6.5181e+06	2.36494e+07	5.46922e+06	1.57948e+07	2.46381e+07	1.51211e+07	6.374e+06	6.97699e+06	6.61743e+06
1535	82.8871	157.013	3.01615e+06	2.48951e+06	2.25078e+06	1.58571e+06	2.39099e+06	6.90292e+07	1.04619e+06	854090	3.17148e+06	947266	621706	1.34853e+06	786190	0	375758	620751	357359	1.09995e+06	0	2.16361e+06	5.07017e+06	6.46554e+06	4.21748e+06
1536	83.1502	162.031	797623	2.25953e+06	1.34886e+06	747345	1.83865e+06	1.05352e+06	631264	782244	1.8615e+06	861162	115112	0	43707	0	72497.2	0	58513.2	94924.3	0	197799	357598	267647	350897
1537	83.2562	361.129	5.65237e+06	2.70282e+06	849798	1.69574e+06	2.63981e+06	2.48441e+06	2913420	1.15223e+06	2.15561e+06	1.82844e+06	330406	779487	0	77008.7	1.6792e+06	282613	531571	0	91910	934961	1.17342e+06	1.22956e+06	1.06752e+06
1538	83.3224	286.039	5.35232e+06	249700	187174	762642	313386	2.06176e+06	641306	399513	815597	2.884e+06	0	0	0	0	0	0	0	0	0	0	300877	124701	215945
1539	83.4205	507.151	2.63701e+07	1.25563e+07	3.28361e+07	1.00699e+07	2.27001e+07	2.0402e+07	1.78249e+07	1.02502e+07	4.18858e+06	2.53285e+07	6.33368e+06	7.53246e+06	1.17073e+07	818413	6.32288e+06	2.73517e+06	9.04149e+06	7.69129e+06	2.37426e+06	7.76514e+06	9.90892e+06	9.97394e+06	9.9024e+06
1540	83.5186	391.139	4.76642e+06	2.02051e+06	1.85545e+06	1.30336e+06	2.47351e+06	2.17367e+06	2.82991e+06	532523	1.6646e+06	2.22631e+06	0	0	0	0	0	0	164931	0	0	0	900455	940790	1.02123e+06
1541	83.7609	508.154	6.02679e+06	3.33841e+06	8.28933e+06	2.41176e+06	5.27495e+06	5.23316e+06	4.61563e+06	2.48239e+06	992071	6.39946e+06	143478	571441	1.80519e+06	0	347937	0	1.40693e+06	1.03875e+06	0	435413	2.24311e+06	2.44981e+06	2.55458e+06
1542	84.0157	157.049	1.32373e+07	4.20254e+06	7.51037e+06	3.97076e+06	5.16344e+06	2.1932e+08	3.03422e+06	2.64947e+06	5.68564e+06	2.6734e+06	5.66544e+06	9.64707e+06	4.06986e+06	0	3.43807e+06	9.30069e+06	665008	6.20836e+06	5.36247e+06	8.10415e+06	6.8693e+06	1.94565e+07	2.0454e+07
1543	84.0242	453.395	177995	980253	341473	396342	262348	236139	579214	443939	324728	166207	0	0	0	0	0	0	0	0	0	0	63863.8	77516	0
1544	84.0774	260.031	0	2.91573e+06	2.15502e+06	1.40882e+06	1.37722e+06	1.54705e+06	662273	1.33846e+06	5.21574e+06	563352	0	0	0	0	0	63931.5	0	0	0	0	538579	937918	400330
1545	84.1159	316.257	3.16625e+06	4.29027e+06	4.48886e+06	7.60539e+06	2.77938e+06	1.1356e+07	9.61618e+06	6.25634e+06	6.55547e+06	2.07572e+07	1.0373e+07	1.87445e+07	1.47717e+07	1.39089e+07	9.27982e+06	9.27891e+06	7.67354e+06	9.74177e+06	1.99189e+07	2.13547e+07	9.74764e+06	9.99939e+06	9.75083e+06
1546	84.2133	693.253	777317	426392	946274	794537	1.66614e+06	1.06615e+06	1.86989e+06	368359	565120	844462	2.08398e+06	378491	1.67835e+06	3.10747e+06	2.13451e+06	1.57542e+06	4.4331e+06	981009	913636	1.28579e+06	1.10849e+06	1.2903e+06	1.16876e+06
1547	84.2177	259.027	1.92597e+07	3.23144e+07	2.70761e+07	1.70344e+07	1.62512e+07	2.06615e+07	1.59452e+07	2.22702e+07	5.25534e+07	1.15119e+07	0	0	0	86829	0	0	0	0	0	0	1.40937e+07	1.5581e+07	1.52746e+07
1548	84.3772	213.113	1.00702e+06	102557	54863.8	431524	255465	1.87109e+06	778191	1.19529e+06	164726	157520	6.97652e+06	7.82229e+06	5.58918e+06	6.05108e+06	6.24205e+06	5.99937e+06	5.22921e+06	6.90888e+06	8.64392e+06	5.00708e+06	2.91121e+06	2.85009e+06	2.96157e+06
1549	84.8638	217.107	0	0	0	0	0	0	0	0	0	0	6.49939e+06	6.79454e+06	6.73815e+06	6.48167e+06	7.33224e+06	6.94553e+06	4.4207e+06	5.61396e+06	7.71812e+06	4.45892e+06	834336	1.74382e+06	1.85023e+06
1550	84.965	424.342	405734	1.01717e+06	833821	839680	223167	224672	691378	808446	797154	116093	0	0	0	0	0	0	0	177821	0	0	51259.5	78815	344711
1551	84.9831	459.166	0	0	0	0	0	0	0	0	0	0	1.61302e+06	2.37451e+06	208786	4.46342e+06	7.16762e+06	802784	236222	268214	397051	975109	491477	357561	328857
1552	85.498	261.024	0	1.20861e+06	806382	356713	524569	348098	256490	438554	1.76057e+06	233501	0	198537	0	0	0	0	0	0	0	0	153821	83732.1	0
1553	85.5173	571.349	0	0	0	36639.1	0	100983	0	0	0	0	8.67521e+06	1.33135e+07	9.82032e+06	1.7928e+07	1.34686e+07	1.00351e+07	9.94989e+06	9.06349e+06	1.51348e+07	6.78041e+06	4.56618e+06	4.53951e+06	4.44294e+06
1554	85.7702	248.056	1.87089e+06	0	3.20202e+06	133301	276771	382228	709699	1.26112e+06	674215	671112	105149	121807	0	0	0	80929.5	619633	0	1.30325e+06	799260	449272	387003	683840
1555	85.8624	305.088	3.08521e+06	296500	1.95039e+06	1.34035e+06	976615	3.80264e+06	1.9533e+06	1.0943e+06	1.02839e+06	182785	0	0	0	68373.5	0	104196	39168.8	141688	0	0	984515	931506	1.03461e+06
1556	85.9172	572.351	0	0	0	0	0	0	0	0	0	0	2.09556e+06	3.35757e+06	3.18991e+06	5.78639e+06	3.89556e+06	2.91538e+06	3.2945e+06	2.60583e+06	4.29228e+06	2.17307e+06	1.10593e+06	1.01166e+06	1.16084e+06
1557	86.0769	239.059	1.85458e+06	2.27666e+06	2.79159e+06	4.72587e+06	2.02693e+06	475540	2.61225e+06	536036	2.65304e+06	4.17898e+06	1.41367e+06	1.25618e+06	1.07348e+06	679718	1.12971e+06	1.55751e+06	1.11317e+06	1.39912e+06	1.41327e+06	935969	1.38656e+06	1.13229e+06	1.02048e+06
1558	86.0892	231.087	409267	0	719938	205654	306963	402289	439043	504950	644219	673073	4.06039e+06	2.61235e+06	2.1718e+06	2.34531e+06	3.35235e+06	3.97312e+06	1.69132e+06	2.37349e+06	3.57843e+06	1.62425e+06	1.01147e+06	912228	981097
1559	86.1513	315.253	1.65517e+07	2.25901e+07	2.30213e+07	3.81736e+07	1.43104e+07	5.81446e+07	4.86991e+07	3.23311e+07	3.33283e+07	1.0931e+08	5.12144e+07	9.92547e+07	7.15889e+07	7.2349e+07	4.85021e+07	4.99941e+07	3.94242e+07	4.17532e+07	1.00223e+08	1.0936e+08	5.02876e+07	4.94614e+07	5.23231e+07
1560	86.2598	266.074	1.44312e+06	517694	1.79513e+06	875489	112227	109294	544548	1.07993e+06	110326	2.02941e+06	88597.9	0	0	0	0	0	0	0	0	116061	531404	451881	236793
1561	86.5724	465.175	0	0	0	0	0	0	0	0	0	0	1.8552e+06	7.23183e+06	482989	1.46581e+06	4.4939e+06	2.21846e+06	183054	522491	332259	1.75949e+06	251189	514244	356362
1562	86.6026	271.191	4.74184e+06	902537	564294	867124	543120	882525	1.92232e+06	1.04869e+06	676851	525261	1.78243e+06	1.62412e+06	1.2801e+06	1.68174e+06	1.55858e+06	1.61303e+06	1.47172e+06	2.99257e+06	1.88237e+06	1.43582e+06	607306	1.11984e+06	979943
1563	86.6329	234.007	3.40041e+06	6.54222e+06	2.45285e+06	3.12914e+06	3.27337e+06	2.34132e+06	2.33051e+06	2.94374e+06	3.09472e+06	4.09362e+06	0	0	0	0	0	0	0	0	0	193209	1.38863e+06	2.20603e+06	1.14714e+06
1564	86.7605	517.286	2.21085e+06	3.28721e+06	1.22702e+06	1.40895e+06	2.85573e+06	3.66718e+06	1.9724e+06	6.56785e+06	2.10461e+06	2.23592e+06	401162	1.26111e+06	1.63658e+06	1.31601e+06	259549	1.44523e+06	1.0583e+06	596948	804931	818760	1.69341e+06	1.61126e+06	1.8675e+06
1565	86.7742	566.232	0	84410.6	2.53722e+06	0	191400	242953	92895	569286	0	577260	760632	188135	1.18155e+06	1.58774e+06	1.18194e+06	540765	1.58037e+06	176064	0	467222	230591	506456	360076
1566	86.897	565.155	1.07105e+06	235941	9.22639e+06	286626	1.24365e+06	1.24583e+06	1.29495e+06	2.76268e+06	390652	2.38819e+06	3.37557e+06	1.34018e+06	3.34722e+06	6.01647e+06	4.32881e+06	2.41889e+06	6.22083e+06	2.14728e+06	2.16211e+06	2.32189e+06	966181	945906	802707
1567	86.9207	238.075	2.56026e+06	0	849641	1.56875e+06	1.98551e+06	967967	4.89249e+06	448149	361481	2.96565e+06	410120	169058	329032	0	73362.9	1.11985e+06	298228	378559	570432	295581	968316	792411	1.24859e+06
1568	86.9207	573.415	1.19538e+06	1.29361e+06	1.50337e+06	1.969e+06	925632	516370	764131	1.57029e+06	1.37764e+06	197790	466354	266236	287536	343647	328927	512960	419851	409296	827344	222161	330160	507435	331116
1569	86.9432	271.082	0	685283	0	43579.8	272927	1.66593e+06	1.9737e+06	0	86105.7	680929	4.21609e+06	4.43455e+06	1.11422e+06	0	538509	1.405e+06	311510	1.63367e+06	1.91218e+06	1.05511e+06	447628	501843	200856
1570	87.006	389.124	579619	305660	313440	0	909428	257946	850896	139180	236616	280683	0	0	0	93678.8	0	0	0	0	0	0	42557.1	0	247872
1571	87.301	754.555	0	0	0	0	0	0	0	0	0	0	1.23001e+06	0	510310	963522	293192	851567	87885.5	901972	386608	0	0	261346	205886
1572	87.3834	290.074	0	57090.4	0	0	0	100798	0	47522.6	0	0	2.13015e+07	3.8947e+07	7.34573e+06	4.25434e+07	8.42735e+07	1.59599e+07	1.0261e+07	9.08106e+06	8.31745e+06	2.19352e+07	1.29466e+07	1.13541e+07	1.5192e+07
1573	87.4389	753.55	0	0	0	0	0	0	0	0	0	0	3.10268e+06	1.34718e+06	1.9684e+06	2.7463e+06	1.25078e+06	1.81915e+06	974549	2.35373e+06	2.14933e+06	843465	485983	715103	690445
1574	87.4548	405.249	883286	1.65687e+06	128591	1.32807e+06	261107	1.38157e+06	375741	461962	187376	158459	77677.2	0	0	0	0	0	0	0	0	0	82606.8	128566	53677.5
1575	87.584	291.077	0	0	0	0	0	0	0	0	0	0	2.04119e+06	2.13297e+06	321695	3.79624e+06	7.05608e+06	1.47214e+06	642173	343595	116929	1.08829e+06	578799	410951	606066
1576	87.6039	227.019	4.21751e+06	4.58769e+06	8.96821e+06	5.41277e+06	5.76285e+06	6.98466e+06	4.4421e+06	4.05522e+06	7.83606e+06	5.55882e+06	0	0	0	0	0	0	0	0	0	0	3.24428e+06	3.35526e+06	3.59719e+06
1577	87.6078	267.018	485033	1.24703e+06	525137	0	714283	3.5918e+06	1.4952e+06	567540	4.67698e+06	42792.2	0	0	0	0	0	0	0	0	0	0	477753	540290	690956
1578	87.6403	537.161	8.1553e+06	1.10344e+06	6.62507e+06	1.43642e+06	6.5646e+06	4.75322e+06	7.16642e+06	3.99165e+06	1.84066e+06	1.3067e+07	416421	811679	821976	600667	2.1642e+06	451578	610696	415869	1.859e+06	491072	2.75272e+06	4.42788e+06	3.19998e+06
1579	87.6499	412.133	2.87791e+06	1.08587e+06	1.19601e+07	6.93567e+06	5.57913e+06	7.00354e+06	5.63517e+06	7.72544e+06	4.22272e+06	4.95508e+06	0	0	0	0	0	0	0	0	0	0	3.4067e+06	3.50593e+06	3.99943e+06
1580	87.7392	413.134	98277.7	159442	1.79338e+06	786005	798751	607731	760393	1.20195e+06	516657	676760	0	0	0	0	0	0	0	0	0	0	150098	273270	328345
1581	87.7392	538.164	2.0613e+06	212556	1.63127e+06	102153	1.6537e+06	1.15815e+06	1.93463e+06	1.09906e+06	527117	2.76041e+06	0	187627	79875.6	0	127180	0	0	0	0	0	524641	606188	685663
1582	87.8344	411.129	1.51959e+07	4.25709e+06	5.89047e+07	2.66698e+07	2.73211e+07	3.74871e+07	2.90924e+07	3.86408e+07	2.76191e+07	2.38293e+07	0	181627	0	0	66109.1	0	0	0	0	0	2.14218e+07	1.8057e+07	1.88298e+07
1583	88.1472	191.996	937907	1.7253e+06	1.15652e+06	775874	1.02878e+06	743104	1.09695e+06	606123	2.97085e+06	2.49319e+06	81708.3	121449	104257	58292.1	0	0	0	0	0	0	851567	796159	921657
1584	88.3222	272.059	1.81224e+06	0	318378	365049	1.42413e+06	1.64431e+06	1.47382e+06	138482	772519	5.75768e+06	144682	0	0	53272.8	0	522566	115270	402453	0	0	609822	677585	714823
1585	88.3427	476.258	91706.7	540097	0	0	112298	6.18632e+06	0	311841	389054	0	1.05519e+06	1.89204e+06	1.2923e+06	352928	1.35535e+06	1.39979e+06	956092	2.80699e+06	2.25617e+06	427290	571158	687944	439671
1586	88.4438	587.212	207770	917596	436107	611606	776941	709797	886719	275811	440071	425185	0	0	0	60038.1	94202.9	0	0	0	0	0	136125	310828	284649
1587	88.5178	211.097	2.76953e+06	286381	1.41051e+06	1.21439e+06	1.29897e+06	2.95643e+06	1.59268e+06	211676	505594	1.22488e+06	8.1904e+06	1.05158e+07	8.95481e+06	9.82773e+06	9.0011e+06	8.76938e+06	7.13792e+06	9.85314e+06	1.37622e+07	6.62956e+06	3.91212e+06	4.85442e+06	4.29097e+06
1588	88.573	101.06	3.92833e+08	2.55552e+06	8.31651e+06	1.87794e+06	1.03917e+06	9.79391e+06	3.87224e+07	4.434e+06	0	0	1.45512e+08	1.20245e+07	6.65444e+06	2.59873e+07	2.24564e+07	6.74352e+07	7.81252e+07	5.35476e+07	1.1966e+08	5.19352e+07	5.39411e+07	5.24879e+07	5.64351e+07
1589	88.573	102.063	2.10333e+07	185797	0	0	0	0	2.01547e+06	0	0	0	7.43062e+06	633398	304195	1.1386e+06	931576	3.01859e+06	3.9084e+06	2.27681e+06	5.53888e+06	2.44597e+06	2.41682e+06	2.25714e+06	2.46418e+06
1590	88.6387	199.133	9.79477e+06	2.90884e+06	2.53079e+06	3.16275e+06	2.59155e+06	6.26515e+06	5.05538e+06	5.10805e+06	2.84508e+06	1.70835e+06	6.74729e+06	9.2081e+06	9.35691e+06	1.35646e+07	1.06791e+07	7.60402e+06	8.75988e+06	8.92325e+06	1.31239e+07	6.97154e+06	5.79972e+06	6.30921e+06	6.20437e+06
1591	88.8082	287.055	263895	1.01912e+06	169587	690720	142668	328423	400555	682767	218861	218295	3.33107e+06	5.38109e+06	1.56793e+06	9.65503e+06	1.29683e+07	3.79624e+06	1.77346e+06	1.39348e+06	968586	2.36333e+06	2.02088e+06	1.37325e+06	1.16055e+06
1592	88.9308	200.137	1.11661e+06	338300	312180	565711	329566	1.66268e+06	733838	602935	477323	500314	596738	658322	784396	900807	709438	799394	772911	933092	1.56559e+06	682346	563128	488438	557845
1593	89.2428	205.071	1.58159e+06	7.13361e+06	1.83358e+06	4.85212e+06	57007.7	0	1.93267e+06	0	0	802015	0	0	81101.6	0	195359	0	0	140449	0	0	1.39729e+06	1.22698e+06	1.30948e+06
1594	89.2878	212.1	0	78749.6	0	0	0	50428	0	31297.4	0	74779.8	1.02385e+06	1.09952e+06	894900	850511	985719	560315	1.17616e+06	947021	1.32333e+06	708331	125867	423404	93334.7
1595	89.3721	202.152	79633.2	324336	210125	319593	209690	1.35739e+06	288379	1.05999e+06	92419.5	75866.9	405196	110797	61682.9	168528	95841.7	206947	65243.7	0	0	0	309255	299057	293023
1596	89.3944	439.378	0	890734	452643	571863	324775	380620	811142	563793	592124	404095	0	0	0	0	0	0	70162.2	0	0	0	63116.3	85583.1	365982
1597	89.499	379.216	2.0405e+07	1.75835e+07	1.25999e+07	2.20154e+07	2.12676e+07	2.86626e+07	1.97247e+07	6.04228e+07	2.81396e+06	2.42232e+06	948601	1.46205e+07	1.00914e+07	1.08933e+07	1.24208e+06	597880	1.22949e+06	1.19681e+06	1.31236e+07	1.25773e+07	1.67079e+07	1.72769e+07	1.80937e+07
1598	89.6489	567.171	3.81308e+06	38013.9	751941	342334	4.59593e+06	931376	6.37575e+06	2.20833e+06	989395	6.5228e+06	0	0	95038.8	1.11648e+06	0	0	0	0	0	0	1.00109e+06	1.07599e+06	1.37265e+06
1599	89.7699	369.191	991098	0	0	0	0	0	0	0	0	0	1.21923e+06	1.62567e+06	656267	846293	861329	4.6984e+06	823430	1.1972e+06	1.27987e+06	773840	1.12123e+06	491675	754157
1600	90.0254	201.149	1.79132e+06	4.90614e+06	3.53008e+06	4.28972e+06	2.34582e+06	1.34477e+07	3.08953e+06	9.59041e+06	2.57171e+06	1.88271e+06	5.44533e+06	6.79947e+06	4.51259e+06	3.53931e+06	3.0623e+06	2.75708e+06	2.63144e+06	3.25171e+06	3.59899e+06	5.03345e+06	3.99213e+06	3.90171e+06	4.1829e+06
1601	90.2014	298.041	500335	350265	619996	1.02043e+06	1.36523e+06	94340.4	668400	236606	355680	263610	0	0	0	0	0	0	0	0	0	0	100026	170945	157424
1602	90.292	655.238	693697	84263.5	278972	0	295282	724475	613624	32605.4	0	112836	3.06124e+06	2.10043e+06	1.08379e+07	3.29455e+06	1.53404e+06	467362	4.21813e+06	2.56676e+06	1.30706e+06	6.05768e+06	1.39866e+06	1.54342e+06	1.63681e+06
1603	90.4396	222.991	461245	2.07826e+06	567041	62849.2	965589	610086	225718	758847	1.4016e+07	4.68926e+06	0	0	57218.4	0	0	0	0	62972.4	118379	70436.5	1.15258e+06	1.11069e+06	1.53489e+06
1604	90.4396	347.113	7.24142e+06	168755	423403	243904	462504	1.03454e+06	371158	681713	91688.7	1.35141e+06	317413	99208.8	152410	811090	2.16356e+06	363265	324850	0	550609	904625	416253	671906	418236
1605	90.548	247.039	2.92175e+06	578757	1.04868e+06	588725	502590	481646	736978	301357	1.1865e+06	1.61448e+06	0	0	292686	0	128141	0	233822	99371.3	0	0	642369	685224	722515
1606	90.548	383.08	596070	1.54214e+06	256289	1.43571e+06	897070	1.81541e+06	1.55506e+06	368280	1.33214e+06	123639	559763	0	156164	256217	0	0	290605	0	0	0	269515	333945	243312
1607	90.548	440.164	1.25634e+07	2.79658e+06	2.5355e+06	2.38748e+06	3.17025e+06	5.16054e+06	6.01505e+06	1.35218e+06	2.24054e+06	3.7331e+06	117370	0	43479.6	60001.9	0	117900	510095	0	135105	381066	2.37815e+06	2.21745e+06	2.36752e+06
1608	90.614	488.257	0	0	0	0	0	0	0	0	0	0	2.60201e+06	5.22691e+06	3.23643e+06	2.39095e+06	2.41518e+06	2.86833e+06	2.62527e+06	3.11744e+06	5.82332e+06	1.988e+06	878575	1.40166e+06	947007
1609	90.6395	577.359	0	48375.6	1.49246e+06	4.24382e+06	141544	164121	4.73579e+06	1.58593e+06	97667.6	0	96906	0	0	0	0	4.15847e+06	0	0	323300	0	876165	844237	691446
1610	90.8733	487.254	0	59846.9	0	45920.9	0	0	0	0	0	0	1.20338e+07	2.34112e+07	1.17819e+07	1.06989e+07	1.41875e+07	1.37131e+07	1.06243e+07	1.75931e+07	2.59195e+07	9.72056e+06	5.18164e+06	5.80371e+06	7.30463e+06
1611	90.8839	797.633	277715	452630	292742	318424	295451	222468	103482	555578	481992	497596	0	0	0	0	0	0	0	0	0	0	70235.9	130256	48182.5
1612	90.9398	656.242	0	0	0	0	0	134151	172988	0	0	0	1.03304e+06	221854	4.33993e+06	950811	199848	0	1.53071e+06	824413	155510	1.81859e+06	65527	363099	270096
1613	91.088	889.716	447711	86567	386860	440528	385896	485698	0	370513	809617	408440	133847	128068	306281	0	0	164694	108231	234392	0	707868	123052	245049	258919
1614	91.1404	439.16	5.50117e+07	1.13066e+07	1.07997e+07	1.0984e+07	1.40244e+07	2.31161e+07	2.7886e+07	5.25376e+06	9.78551e+06	1.87866e+07	1.42916e+06	1.9355e+06	1.72663e+06	4.37466e+06	3.87734e+06	2.41522e+06	4.19537e+06	2.16516e+06	3.95589e+06	3.61601e+06	1.30031e+07	1.04521e+07	1.34341e+07
1615	91.1424	163.05	4.70574e+06	3.04671e+06	2.76591e+06	5.04282e+06	3.25868e+06	2.88998e+06	6.48323e+06	1.70372e+06	2.77008e+06	8.13901e+06	1.02626e+07	7.70927e+06	2.89863e+06	2.41231e+06	1.34756e+07	7.40405e+06	2.25406e+07	6.58164e+06	1.81274e+07	2.13211e+07	6.36239e+06	6.58706e+06	7.56278e+06
1616	91.1792	431.246	0	592967	744504	719982	271196	0	418088	222110	2.73588e+06	537836	160966	0	165386	80305.5	254375	232761	0	376819	0	0	858943	178660	973150
1617	91.1792	796.629	1.07983e+06	1.29077e+06	722318	757373	573835	572434	608742	1.37893e+06	995361	885047	168195	0	0	0	0	0	194285	280955	0	0	561177	374166	430146
1618	91.2199	142.981	3.17054e+06	9.3208e+07	1.44579e+08	1.13682e+08	1.12954e+08	5.07134e+07	7.80386e+07	7.65221e+07	5.64615e+07	1.06978e+08	2.30354e+06	4.85966e+06	4.20054e+06	4.04061e+06	6.14592e+06	2.13457e+06	3.82291e+06	1.29919e+07	1.20099e+07	1.17558e+07	2.18611e+06	8.89582e+07	9.23268e+07
1619	91.2199	215.001	6.15316e+06	1.14878e+07	2.22695e+07	6.48882e+06	5.92054e+06	5.70048e+06	5.52059e+06	4.37542e+06	9.26845e+06	3.95121e+06	0	0	0	0	0	0	0	0	0	0	5.49155e+06	5.64241e+06	5.5122e+06
1620	91.2268	857.654	0	442438	302788	435228	234851	141862	124213	536420	336928	399029	0	0	0	0	0	193457	0	64433	0	0	162793	164906	118694
1621	91.2337	309.061	4.30701e+06	2.84636e+06	5.27193e+06	3.09037e+06	1.11252e+06	1.31748e+06	4.74243e+06	2.90013e+06	2.1524e+06	6.30838e+06	114208	0	0	0	0	78842.2	0	0	0	0	2.04137e+06	1.9063e+06	1.91028e+06
1622	91.2337	888.712	1.46509e+06	279685	1.00675e+06	869373	802715	1.39294e+06	118734	1.32631e+06	1.84433e+06	1.08949e+06	571107	545944	743230	92809.9	113035	1.50105e+06	452957	1.09389e+06	134061	999342	955358	522490	964578
1623	91.2541	415.197	0	0	0	0	0	0	0	0	0	0	4.5596e+06	8.28158e+06	2.54527e+06	1.40982e+06	3.05929e+06	3.96723e+06	1.83888e+06	2.19819e+06	2.27368e+06	1.11785e+06	1.81014e+06	1.74273e+06	2.10692e+06
1624	91.2612	173.994	201136	1.04216e+06	2.46744e+06	740134	507105	159038	214899	671633	969096	532511	0	0	0	0	0	0	0	0	0	0	236853	299581	131090
1625	91.2806	856.65	599960	636805	802101	890791	409170	420511	458102	976973	1.43215e+06	786011	205745	0	287145	83451.2	172017	92105.4	215023	165728	0	231452	122944	390432	284895
1626	91.3012	207.05	4.84867e+06	5.68825e+06	8.79284e+06	1.38361e+07	1.30926e+07	8.13061e+06	7.47886e+06	8.60681e+06	7.10858e+06	6.07238e+06	3.99716e+06	3.10069e+06	5.14935e+06	7.21556e+06	9.2424e+06	5.03449e+06	5.6117e+06	3.97312e+06	7.55324e+06	6.49774e+06	7.57408e+06	9.82541e+06	8.8701e+06
1627	91.4381	264.16	0	0	0	0	0	0	0	0	0	0	285225	223439	173022	57133.4	2.16194e+06	1.56305e+06	593898	728778	1.62839e+06	172212	167999	60241.4	178289
1628	91.5239	497.129	402529	31911	0	0	89338.7	363125	429846	287587	172674	432955	8.48077e+06	800050	5.8481e+06	2.80141e+06	1.02213e+06	1.06456e+06	3.55119e+06	429597	110539	6.64102e+06	848218	1.42536e+06	853302
1629	92.0187	347.207	0	0	0	0	0	0	0	0	53485.1	0	288522	1.28353e+06	774814	1.27943e+06	269972	85175	583953	215676	646126	919835	274213	225960	586303
1630	92.1037	341.01	0	0	0	38915.7	0	0	36560.6	0	34521	42884.6	2.14895e+06	3.28556e+06	1.37198e+06	1.71573e+06	0	503873	1.62851e+06	1.17729e+06	2.73534e+06	2.568e+06	434896	719594	745754
1631	92.1282	239.092	806374	739053	1.64422e+06	1.78438e+06	909772	570237	1.10425e+06	105799	912441	1.85693e+06	1.82905e+06	3.24672e+06	1.42336e+06	1.46675e+06	2.01761e+06	2.07131e+06	1.27053e+06	3.28714e+06	3.34231e+06	1.32568e+06	1.19383e+06	560848	1.51333e+06
1632	92.1295	417.249	1.5025e+06	267740	1.11617e+06	319365	520469	0	236786	428119	869425	1.66993e+06	4.04367e+06	6.97246e+06	3.86164e+06	3.86591e+06	3.14536e+06	1.97624e+06	3.35544e+06	4.13374e+06	4.32986e+06	2.63785e+06	1.71455e+06	1.82219e+06	2.36821e+06
1633	92.1429	396.311	855219	1.08141e+06	1.00438e+06	642261	344009	253716	863992	1.07622e+06	1.11799e+06	100739	83112.4	0	0	0	0	0	104503	148556	0	0	152892	247731	347655
1634	92.1684	253.075	603810	4.0097e+06	3.47636e+06	3.22888e+06	1.71955e+06	247048	1.41306e+06	730805	1.03993e+07	3.20779e+06	1.14146e+06	1.5564e+06	1.00408e+06	1.27745e+06	835482	1.4496e+06	885871	601223	1.15217e+06	583920	1.23868e+06	1.13359e+06	1.44808e+06
1635	92.2861	217.017	2.59801e+06	1.89805e+06	2.84958e+06	1.49252e+06	1.47032e+06	1.76512e+06	1.85394e+06	946822	1.9707e+06	2.72906e+06	0	105846	232863	119743	1.24314e+06	88306.5	320917	0	92713.7	632772	1.11197e+06	1.04705e+06	1.11841e+06
1636	92.3637	470.175	7.3883e+06	808668	701264	1.81721e+06	2.83656e+06	2.56605e+06	5.42363e+06	1.94229e+06	2.70594e+06	4.22575e+06	0	0	0	0	119158	0	76615.7	0	93697.4	368586	518336	1.07295e+06	1.87028e+06
1637	92.4705	279.091	1.40331e+06	2.8878e+06	2.63386e+06	4.16216e+06	2.15451e+06	1.41567e+06	2.13744e+06	648561	4.65969e+06	2.10291e+06	76215.6	0	59862.7	56405	0	0	99054.8	0	185756	0	1.27824e+06	1.18007e+06	1.15676e+06
1638	92.861	469.171	3.08123e+07	5.61814e+06	1.03188e+07	8.1938e+06	1.26011e+07	1.05587e+07	2.31855e+07	8.34076e+06	1.0414e+07	1.82959e+07	934576	631374	1.24177e+06	1.93772e+06	2.06127e+06	1.0477e+06	2.31901e+06	619533	1.07216e+06	3.2693e+06	7.97473e+06	7.82371e+06	8.926e+06
1639	92.8816	153.091	0	0	0	0	0	0	0	0	0	0	4.36133e+06	8.79476e+06	4.29453e+06	9.2101e+06	6.97198e+06	4.47405e+06	5.2044e+06	5.48645e+06	7.174e+06	5.63445e+06	770953	610840	823691
1640	92.9617	127.112	2.17745e+06	585016	2.65687e+06	0	1.32513e+06	2.81334e+06	2.85184e+06	2.7056e+06	2.39957e+06	1.76637e+06	2.33696e+07	4.91719e+07	3.00893e+07	6.0369e+07	5.01503e+07	2.52264e+07	3.77724e+07	3.24614e+07	4.61257e+07	4.38558e+07	2.36114e+07	2.31231e+07	2.57542e+07
1641	92.9834	128.115	0	0	0	0	0	0	0	0	0	0	1.80449e+06	3.11929e+06	2.35355e+06	4.03997e+06	3.86732e+06	1.76187e+06	2.51627e+06	2.49264e+06	3.27654e+06	3.64373e+06	1.38747e+06	1.24609e+06	1.72611e+06
1642	92.9834	319.14	0	137738	285550	262771	115812	247276	207879	332410	312644	423975	1.11589e+06	866001	2.02339e+06	3.17936e+06	5.59893e+06	1.05237e+06	2.44984e+06	901882	3.17589e+06	3.02023e+06	1.22759e+06	1.77857e+06	1.15627e+06
1643	92.9834	413.193	65102.4	0	1.13192e+06	436499	0	220973	0	404280	0	135280	505036	438033	629889	516052	399089	5.85747e+06	568884	245428	870985	421988	2.00195e+06	1.94378e+06	1.65736e+06
1644	93.0132	337.275	169818	168319	133474	552041	185816	444330	501131	424610	654135	158928	785695	674584	540538	116394	0	150293	224644	827565	674724	807374	499347	407786	609155
1645	93.0435	172.105	1.83209e+07	3.84004e+06	6.85715e+06	3.14393e+06	3.43323e+06	9.00505e+06	7.93917e+06	6.29281e+06	5.00894e+06	4.85062e+06	3.90417e+07	7.62449e+07	4.43807e+07	8.78226e+07	7.60516e+07	3.9654e+07	5.49507e+07	5.04244e+07	6.82386e+07	6.46493e+07	3.53697e+07	3.46776e+07	3.80591e+07
1646	93.055	415.124	870146	1.36901e+06	2.07825e+06	1.68229e+06	3.12633e+06	1.21718e+06	1.88221e+06	1.10746e+06	572747	1.02671e+06	0	0	0	0	0	0	0	0	0	0	0	143403	137862
1647	93.0628	171.102	5.80544e+07	4.34092e+07	6.69462e+07	3.66746e+07	3.86757e+07	1.04631e+08	8.53178e+07	6.83122e+07	6.1491e+07	5.41102e+07	4.13644e+08	8.10745e+08	4.79709e+08	9.5324e+08	8.07219e+08	4.30202e+08	5.86927e+08	5.38832e+08	7.47528e+08	7.00971e+08	3.80535e+08	3.78001e+08	4.10787e+08
1648	93.0628	349.15	103523	750181	1.26019e+06	771675	1.21166e+06	639684	701806	427455	518305	1.30801e+06	2.41654e+06	1.47125e+06	4.66839e+06	9.67179e+06	1.351e+07	2.09208e+06	7.01286e+06	2.55536e+06	6.45385e+06	7.84949e+06	3.13168e+06	2.74096e+06	2.78756e+06
1649	93.0628	350.153	0	0	0	0	63540.6	0	0	0	0	0	105412	0	467007	1.32758e+06	1.94858e+06	99743.8	822980	88151.3	461644	913363	88888.9	167258	0
1650	93.1526	242.086	1.08777e+06	631955	4.27911e+06	2.53696e+06	193511	1.41241e+06	279756	2.00425e+06	1.581e+06	722128	121668	587097	0	316363	0	3.30532e+06	126165	139129	945576	234781	1.16841e+06	633886	982002
1651	93.1585	301.104	4.04711e+06	2.00249e+06	1.23527e+07	6.94351e+06	693035	3.70621e+06	1.29321e+06	5.89942e+06	4.17859e+06	2.56599e+06	517487	162496	580095	200774	723369	9.49266e+06	288615	78265.1	1.01602e+06	505545	3.63305e+06	2.93988e+06	3.01965e+06
1652	93.2705	281.106	1.34933e+06	432032	809580	586067	617088	540750	0	859933	552644	462374	650108	714283	392501	570999	688352	523945	332783	528628	548884	274251	598975	491313	524137
1653	93.3995	302.107	229765	1.86128e+06	1.45782e+06	730384	131824	252478	142870	693274	441391	110617	0	0	0	0	0	951565	0	0	0	0	266700	136775	84553.6
1654	93.4622	377.2	683050	920633	1.239e+06	794492	503584	1.97873e+06	1.54592e+06	1.43383e+06	470600	191186	0	331547	538850	340777	167360	0	0	0	399581	58896.3	702294	562224	475202
1655	93.5357	860.682	925452	102273	465894	255100	422495	266224	0	662439	1.22734e+06	478116	109734	483383	221244	0	0	182250	143730	338312	0	206832	311526	293723	412004
1656	93.8561	421.113	4.76508e+07	1.15769e+07	2.43862e+07	8.82601e+06	1.13349e+07	2.162e+07	1.53122e+07	1.09332e+07	1.6803e+07	1.88606e+07	5.33486e+06	6.83912e+06	4.93557e+06	9.50148e+06	5.82315e+06	4.01082e+06	5.55333e+06	3.25704e+06	7.19048e+06	4.71766e+06	1.57662e+07	1.44336e+07	1.72044e+07
1657	93.8561	561.312	1.64596e+06	2.45401e+06	1.00235e+06	1.2022e+06	1.92359e+06	3.27334e+06	1.69658e+06	3.8923e+06	1.67902e+06	1.70071e+06	0	564361	958867	826813	105780	0	486750	0	634540	663509	1.16024e+06	1.0496e+06	1.10562e+06
1658	93.8857	305.16	822284	336575	68100.7	414239	79776.9	209172	634728	371673	453100	35173.5	0	103454	134184	97520.8	0	0	67794.1	129404	114148	0	542518	514416	556190
1659	93.9434	193.05	304658	6.69366e+06	1.65843e+07	6.18235e+06	9.11674e+06	6.19976e+06	2.13371e+06	1.45912e+06	2.65857e+06	3.6284e+06	927870	1.21788e+06	616733	1.43466e+06	2.68183e+06	709942	1.52594e+06	1.10155e+06	649086	269062	983468	1.19583e+06	867686
1660	93.9438	523.181	0	0	0	0	0	48841.5	0	0	0	0	2.66385e+06	2.18961e+06	4.06765e+06	7.95023e+06	2.46277e+06	2.77535e+06	2.83681e+06	3.43173e+06	7.80126e+06	3.95722e+06	2.22813e+06	1.90791e+06	2.35804e+06
1661	94.053	521.167	2.17958e+06	329076	1.58315e+06	695863	1.62953e+06	3.47822e+06	3.08173e+06	356473	0	1.86878e+06	2.0393e+06	220014	1.44937e+06	4.08528e+06	823944	1.18578e+06	367051	590464	1.55175e+06	1.49804e+06	1.29816e+06	649791	1.44765e+06
1662	94.0619	575.343	1.36745e+06	228136	1.10578e+06	1.42958e+06	295237	68530.3	286849	2.42082e+06	406581	0	0	0	0	0	0	82695.3	0	0	221847	0	492767	237727	619574
1663	94.1052	145.013	1.92856e+07	2.10265e+07	2.80332e+07	1.88156e+07	1.91046e+07	3.05094e+07	1.74243e+07	2.52799e+07	2.70192e+07	1.34478e+07	1.21777e+06	3.86686e+06	1.23844e+06	427647	3.14549e+06	2.51263e+06	546757	0	7.56517e+06	3.808e+06	4.76511e+06	1.78732e+07	1.90572e+07
1664	94.1155	249.061	3.87865e+06	2.14171e+06	5.74142e+06	5.46168e+06	3.79046e+06	3.6028e+06	2.7125e+06	2.99101e+06	3.65131e+06	2.12605e+06	74869.6	468152	264199	99092.8	303918	1.28382e+06	882201	2.77189e+06	916900	114417	2.25078e+06	1.21704e+06	1.88965e+06
1665	94.15	343.118	2.39719e+06	1.55725e+06	877098	1.59403e+06	1.41668e+06	1.39517e+06	2.01736e+06	551328	1.27658e+06	890425	456288	2.20724e+06	798730	2.14505e+06	5.14021e+06	2.65606e+06	1.53245e+06	706971	2.1287e+06	1.8492e+06	0	1.06265e+06	1.03639e+06
1666	94.2545	274.039	3.54726e+06	800892	1.32075e+06	1.91579e+06	872620	2.72068e+06	2.44859e+06	1.90588e+06	838556	1.27512e+06	0	0	0	0	0	100957	120584	0	0	0	1.05271e+06	1.07422e+06	1.08826e+06
1667	94.2601	270.207	8.19222e+06	786331	455528	629588	290485	1.56727e+06	835770	622988	1.37596e+06	706386	650625	703996	421883	532959	469909	236816	795601	669780	779869	1.0995e+06	938420	902017	667913
1668	94.5532	445.244	0	0	0	0	0	0	0	0	0	81001.9	2.01897e+06	6.9579e+06	2.00944e+06	2.8361e+06	4.41241e+06	3.13635e+06	2.38835e+06	4.94762e+06	5.18997e+06	1.69341e+06	1.66992e+06	1.72025e+06	2.21429e+06
1669	94.6338	277.071	373394	710491	1.15489e+06	631950	715954	563488	308152	585096	64873.6	303878	235808	306734	60455	0	88637.7	977732	1.13758e+06	326508	82466.5	0	644764	567379	770678
1670	94.6338	854.708	682505	0	1.38011e+06	1.26982e+06	1.61148e+06	918147	488267	1.47328e+06	1.48749e+06	242069	619048	1.06933e+06	2.14575e+06	0	0	1.17647e+06	1.16716e+06	793857	1.17674e+06	2.09026e+06	826284	806455	1.08113e+06
1671	94.6338	915.733	150364	0	931348	700386	1.04811e+06	109886	64667.5	1.17959e+06	1.06796e+06	104080	262582	286645	1.31297e+06	0	0	383276	685422	463260	567970	613442	331750	391060	0
1672	94.6705	482.139	1.49376e+07	2.0417e+06	1.2456e+07	3.35158e+06	5.30611e+06	2.16989e+07	1.87815e+07	4.77937e+06	6.92078e+06	1.37079e+07	3.74022e+07	1.47361e+07	2.49876e+07	4.64976e+07	2.2018e+07	2.16514e+07	2.3218e+07	8.59523e+06	1.46174e+07	2.87942e+07	1.86556e+07	1.62949e+07	1.81387e+07
1673	94.6846	219.087	1.47418e+06	210201	1.3987e+06	1.1909e+06	1.28363e+06	1.31296e+06	1.08769e+06	1.1945e+06	1.80436e+06	1.25641e+06	1.4975e+06	2.6195e+06	632325	632297	719758	2.55849e+06	170339	684652	1.4499e+06	446841	413244	845394	553622
1674	94.6884	481.135	6.33812e+07	8.31199e+06	5.40608e+07	1.35498e+07	2.45687e+07	9.76972e+07	8.35862e+07	2.11804e+07	3.24428e+07	6.14388e+07	1.5908e+08	6.55947e+07	1.03496e+08	2.02962e+08	9.37582e+07	8.83567e+07	9.09638e+07	4.17722e+07	6.71279e+07	1.31241e+08	7.69484e+07	7.11837e+07	8.27418e+07
1675	94.7135	531.353	0	0	0	39401.8	0	84806.8	0	0	0	0	1.13677e+06	1.52591e+06	1.55979e+06	199970	497511	452314	167960	1.74184e+06	1.69988e+06	564681	455206	408044	540253
1676	94.7768	483.141	2.51945e+06	200954	1.84436e+06	632836	471199	4.337e+06	3.66333e+06	782924	296580	2.74873e+06	6.70087e+06	1.65328e+06	4.53599e+06	9.3222e+06	3.46636e+06	3.59377e+06	4.37482e+06	944373	2.06353e+06	5.84406e+06	2.99052e+06	3.31883e+06	3.23253e+06
1677	94.8438	828.619	2.31102e+06	3.06269e+06	2.98664e+06	3.05614e+06	1.75098e+06	1.15427e+06	1.73625e+06	5.22752e+06	3.65857e+06	3.45835e+06	1.66444e+06	0	0	0	1.1708e+06	910944	1.84357e+06	2.10793e+06	0	0	3.04399e+06	1.61427e+06	2.0853e+06
1678	94.904	769.602	1.59755e+06	1.48273e+06	2.14269e+06	1.95727e+06	1.0924e+06	796019	1.7089e+06	2.17758e+06	2.62145e+06	2.70012e+06	1.08083e+06	0	0	0	802617	820170	1.24265e+06	1.01504e+06	0	0	1.21154e+06	1.25146e+06	1.65975e+06
1679	94.9203	160.105	0	193313	57154.7	337604	0	476058	0	345139	148012	144882	6.08008e+06	1.04154e+07	3.33169e+06	2.35891e+06	1.57045e+06	3.2996e+06	1.02727e+06	3.11245e+06	7.11442e+06	4.03912e+06	1.87558e+06	2.63045e+06	3.17038e+06
[truncated: 3,983 more rows]
